# Supplementary material for: Loss of epidermal microRNA-149 sensitizes to skin inflammation
Source: Research Square preprint supplement (doi:10.21203/rs.3.rs-6047392/v1), 2025-07-29
Supplement: Supplementary file 1 [file 0dd050174f7324e777c6d504.xlsx]

## Sheet: GSE96957(NC-Tweak)_FClog2less-1
Gene_Symbol	log2.Fold_change..normalized	p.value	q.value.Benjamini
Flg	1.61373	1.14357e-191	3.30815e-189
Prl2c3	8.86037	2.28806e-06	2.50408e-05
Gm5483	7.1259	1.50183e-15	4.24321e-14
Cxcl3	6.73349	3.80801e-26	1.84979e-24
Cxcl2	6.70181	4.24428e-128	9.243e-126
Ccl4	6.60099	1.32933e-37	9.61381e-36
Gpr128	6.48013	9.61345e-05	0.000803137
Ccl3	5.94481	6.44009e-44	5.40354e-42
Clec4d	5.93673	1.55906e-35	1.08697e-33
Csf3	5.83798	7.98541e-06	8.10331e-05
Trem1	5.80296	1.06328e-25	5.05109e-24
Stfa2l1	5.68588	3.46926e-08	4.90454e-07
Irg1	5.6651	4.66823e-26	2.25635e-24
Il1b	5.58403	1.24284e-292	5.35307e-290
Clec4e	5.53985	4.56233e-19	1.58756e-17
Treml4	5.52128	5.88654e-13	1.35663e-11
Osm	5.50117	3.03057e-26	1.48705e-24
Mrgpra2b	5.47606	1.07612e-06	1.22691e-05
Il24	5.16935	0.000362252	0.00268086
Trem3	5.12936	0.000144297	0.00116338
Nppb	5.0142	2.38825e-05	0.000223727
Olfm4	4.91275	0.000242226	0.00185713
Cyp4f18	4.89831	5.17529e-15	1.4029e-13
Spib	4.86102	9.88356e-22	4.02444e-20
Il23a	4.80718	0.000900247	0.00614387
Nlrp3	4.68334	9.24086e-39	6.88871e-37
Mmp13	4.66413	2.66736e-49	2.49753e-47
Fgf23	4.63581	0.000223757	0.00173753
S100a9	4.61572	1.9056e-227	6.47969e-225
Rptn	4.60631	0	0
LOC102640171	4.43857	0.00503304	0.027808
BC106175	4.42866	0.00813524	0.0421372
Klk6	4.41642	0	0
Psg18	4.38906	0.00458664	0.0257676
Ubd	4.37866	1.83702e-10	3.44344e-09
Sprr2j-ps	4.29297	0.00064175	0.004528
Serpina10	4.2753	0.000141166	0.00114241
Mcpt8	4.23315	0.0081172	0.042055
Cxcl10	4.18111	6.81708e-23	2.91032e-21
Cxcl11	4.1806	1.25042e-06	1.41234e-05
Chil3	4.17013	0.000231299	0.00178536
Slc7a11	4.16163	3.02892e-18	1.01044e-16
Spink12	4.12136	0.000847824	0.00583542
Slco1a5	4.09795	2.06665e-05	0.000195489
Tcf23	4.09682	1.84596e-18	6.21151e-17
9130409I23Rik	4.09577	0.00150016	0.00973425
Gm7897	4.0788	2.29319e-14	5.91045e-13
Cd300lf	4.07858	3.48834e-15	9.67255e-14
Sprr1b	3.98545	0	0
Lce3e	3.97996	8.44745e-38	6.15521e-36
Hdc	3.96048	1.16959e-87	1.93753e-85
Lce3f	3.88157	7.90502e-50	7.51054e-48
Klk13	3.83752	8.96944e-161	2.31794e-158
Fpr1	3.81625	0.00554125	0.0302793
Plaur	3.79697	1.2062e-51	1.18673e-49
Nlrp12	3.77934	0.00869739	0.0445724
Gm5416	3.71455	9.20286e-09	1.40008e-07
Gm9774	3.66549	0.000110713	0.000911955
Slpi	3.64952	4.28251e-15	1.16742e-13
Tubb3	3.63582	1.13815e-12	2.55913e-11
Slfn4	3.60611	3.31822e-112	6.56263e-110
Cdhr1	3.59196	1.13334e-11	2.35186e-10
Cd14	3.57089	2.00962e-102	3.70957e-100
Krt16	3.54026	0	0
Gm10872	3.49052	0.000272392	0.00206958
S100a8	3.48946	8.5066e-70	1.0847e-67
Gzmb	3.47909	0.000466239	0.00337188
Lce3d	3.41996	4.66169e-34	3.03197e-32
Gzma	3.41783	6.18263e-05	0.000538086
Tnf	3.40407	1.50268e-13	3.64516e-12
Spp1	3.38402	2.54821e-62	3.03003e-60
Gm8991	3.37762	0.000158035	0.00126363
Ptgs2	3.33649	1.83978e-34	1.21702e-32
Tchhl1	3.33003	0.00150918	0.00978294
Krt6a	3.31831	0	0
Fpr2	3.30694	4.20411e-08	5.90464e-07
Ccl17	3.2811	0.000724066	0.00507186
Cd177	3.27822	0.00153115	0.00989887
Sell	3.2451	1.11563e-13	2.73364e-12
Tmprss11bnl	3.23648	3.03961e-05	0.000279875
Gm5478	3.2259	1.36408e-76	2.00293e-74
Lce3a	3.2218	1.53252e-11	3.13988e-10
Epgn	3.19791	4.59904e-24	2.04916e-22
Srgn	3.18275	1.83299e-113	3.70073e-111
Mmp10	3.16466	3.52207e-05	0.0003217
Padi1	3.16419	3.80241e-06	4.05158e-05
Krt6b	3.15568	0	0
Samsn1	3.14744	3.29392e-12	7.12531e-11
Stfa2	3.11767	5.80807e-16	1.66773e-14
Cxcl9	3.1076	5.56769e-22	2.31077e-20
1810033B17Rik	3.08066	1.57471e-05	0.000151846
Mmp8	3.06334	0.00914465	0.0465568
Fcrlb	3.04252	0.00394639	0.0226567
Ccl2	3.02941	4.34596e-25	2.00556e-23
Lce3b	3.01851	1.93201e-13	4.65171e-12
Stra6	3.01724	3.11263e-24	1.39328e-22
Sprr2h	2.99469	2.25051e-89	3.79299e-87
Csf3r	2.98821	2.04671e-55	2.16773e-53
Gsdmc3	2.98731	0.00272068	0.0162503
Il1bos	2.96759	0.00208157	0.0129852
Gsdmc	2.9661	4.2215e-76	6.10605e-74
Gm5150	2.96237	4.41739e-06	4.64557e-05
Klra2	2.95566	0.00707849	0.0374748
Ms4a4a	2.95454	4.82715e-37	3.45239e-35
Ccl1	2.94549	0.00449681	0.025329
Olah	2.9394	0.00438357	0.0247993
Retnlg	2.92529	0.00145295	0.00946271
Gjb2	2.92279	9.02364e-215	2.82091e-212
Sh2d5	2.91982	7.92691e-06	8.04816e-05
Bcl2l15	2.90317	2.29137e-21	9.08208e-20
BC100530	2.89874	0	0
Upp1	2.89583	4.16534e-10	7.46832e-09
Chil1	2.89015	4.13295e-33	2.58403e-31
Cxcl1	2.88705	2.12344e-06	2.33844e-05
Ccl20	2.87318	1.01115e-05	0.000100762
Ear11	2.87123	6.80479e-05	0.000585919
Nrg1	2.86414	2.91004e-06	3.14219e-05
Sprr1a	2.86114	0	0
Atp13a4	2.85758	3.2215e-07	3.93689e-06
Sprr2e	2.84321	1.49637e-11	3.07884e-10
Tnfsf14	2.83643	0.00112249	0.00751243
Ms4a6d	2.82828	7.53637e-71	9.86959e-69
Nfkbid	2.80513	5.29733e-16	1.5256e-14
Gm13124	2.79352	1.66755e-09	2.76953e-08
Akr1d1	2.79292	5.18302e-11	1.02091e-09
LOC102631590	2.79244	0.00700673	0.0371355
Ccl8	2.78349	0	0
Clec4n	2.76917	1.65933e-16	4.96313e-15
Rbp1	2.76115	3.12426e-71	4.11934e-69
Rn7sk	2.7367	5.76599e-06	5.97947e-05
LOC100038947	2.72556	6.09349e-05	0.000531282
Aldh1a3	2.72229	8.16952e-80	1.25668e-77
Sprr2a3	2.71279	2.76627e-222	8.93599e-220
BC117090	2.71194	4.59154e-75	6.54363e-73
Ccr1	2.70594	2.98578e-19	1.04648e-17
Sirpb1a	2.6975	8.271e-05	0.000700343
Lce3c	2.67776	1.56429e-34	1.04189e-32
Galnt6	2.67082	4.9507e-27	2.50534e-25
9930013L23Rik	2.66946	8.39468e-18	2.71176e-16
Nr4a3	2.66569	2.72497e-11	5.49588e-10
Klk1	2.65637	0.00330834	0.0193023
Ccl7	2.64549	2.35672e-20	8.76736e-19
Tpsab1	2.62598	6.39616e-13	1.46019e-11
Cxcl13	2.62551	4.00109e-11	7.9456e-10
LOC73899	2.61745	0.00245717	0.0148828
Gsdmc4	2.61467	7.63293e-05	0.000651725
Cd300ld	2.59363	0.000213272	0.0016601
Serpinb6c	2.59104	1.11025e-21	4.50184e-20
Fosl1	2.58757	0.000399111	0.00292793
Elf3	2.58632	2.24665e-07	2.80571e-06
Pglyrp2	2.5643	0.000890789	0.00609219
Klk14	2.56216	0.000421726	0.00307868
5830416P10Rik	2.56069	0.000926673	0.00630202
Ubl4a	2.54688	0.00136994	0.00900684
Lilrb4	2.54497	5.31348e-42	4.36381e-40
Clec7a	2.5429	1.03165e-14	2.73535e-13
F10	2.53671	0.00362127	0.0209703
Bcl2a1b	2.53518	5.48427e-05	0.000482726
2610528A11Rik	2.5241	2.27473e-34	1.49962e-32
Ccrl2	2.51544	2.32348e-11	4.71556e-10
Ccl5	2.5014	0.000141393	0.00114329
Gm12248	2.49744	2.49425e-10	4.60414e-09
Gad1-ps	2.49268	0.004874	0.0270992
Sprr2g	2.47847	1.09652e-10	2.10215e-09
Draxin	2.47151	0.0023185	0.0142161
Bcl2a1a	2.46196	0.00386312	0.0222181
Stfa3	2.45914	1.21729e-128	2.68109e-126
Slfn1	2.45536	2.77264e-09	4.44862e-08
Degs2	2.45045	1.16701e-30	6.83354e-29
Ifitm1	2.44898	2.02545e-21	8.07761e-20
Gjb6	2.44895	2.40123e-28	1.2928e-26
Fcgr4	2.44387	1.75139e-07	2.22155e-06
Sprr2f	2.44013	2.29598e-05	0.000215395
Bcl2a1d	2.41605	2.86641e-05	0.000264304
Tfec	2.41593	0.000429114	0.00312672
Ms4a4c	2.39492	1.16334e-08	1.74385e-07
Igfl3	2.39403	5.83697e-05	0.000511447
Tnfrsf9	2.38698	0.00130345	0.00860766
Pinlyp	2.37408	4.73844e-15	1.28808e-13
Gsdmc2	2.35111	1.64113e-06	1.83017e-05
Ccl12	2.34866	3.16702e-05	0.000290778
Rbp2	2.34449	3.32995e-26	1.62982e-24
Ankk1	2.34058	0.00102184	0.00687446
Mill1	2.33943	4.29e-72	5.81461e-70
Ms4a7	2.32672	1.71502e-30	9.95227e-29
Phlda2	2.32518	0.00562752	0.0306987
Slc2a3	2.31972	2.33069e-11	4.72032e-10
Ccr5	2.30689	5.64047e-16	1.62201e-14
Mefv	2.30601	1.87759e-05	0.000179092
Ch25h	2.30415	0.00277524	0.0165202
Il18rap	2.30218	5.48321e-07	6.51597e-06
Pla2g4d	2.29406	0.000115386	0.000944826
Gp49a	2.29138	7.60383e-18	2.4645e-16
2310042E22Rik	2.28755	5.7856e-46	5.05119e-44
Slc15a3	2.28613	1.26516e-13	3.08058e-12
Tmprss11e	2.27312	4.63386e-06	4.8574e-05
Plek	2.26405	9.97624e-40	7.73438e-38
Tgm3	2.24546	5.77679e-73	7.94083e-71
Gm6166	2.23886	0	0
Cpxm1	2.23687	1.94631e-102	3.62726e-100
Cd80	2.21842	0.000107144	0.000886327
Fabp5	2.19651	0	0
Mmp9	2.19543	5.36298e-40	4.22542e-38
Ces2f	2.17901	5.64623e-10	9.95771e-09
Serpina1c	2.17	0.00261238	0.0156856
Casp14	2.15649	1.93764e-292	8.1642e-290
Fcgr1	2.15057	9.3012e-12	1.94893e-10
Ccr7	2.14103	0.00372664	0.0215098
Sprr2a1	2.11016	0	0
Rab44	2.10557	1.92854e-09	3.16503e-08
Tmem8	2.09554	1.30561e-23	5.73818e-22
Il2rg	2.09367	5.77407e-31	3.40161e-29
Eme1	2.09117	0.000816375	0.00563697
Krt17	2.08903	0	0
Ltb	2.08354	0.000139219	0.00112854
Lst1	2.08268	5.82729e-07	6.90792e-06
Tlr1	2.07532	5.5211e-11	1.0831e-09
Pglyrp3	2.07526	2.64894e-26	1.30309e-24
Gpr35	2.05783	1.22991e-09	2.08011e-08
Tnc	2.05271	1.37423e-101	2.51277e-99
Adam8	2.04879	2.79138e-37	2.0038e-35
Sprr4	2.03133	1.68735e-06	1.87632e-05
Ms4a14	2.02664	2.27942e-05	0.000214049
Gpr171	2.02616	0.00423706	0.0240759
Pla2g4e	2.02604	1.36347e-59	1.56372e-57
Ms4a6c	2.02526	1.50299e-31	9.04688e-30
Fetub	2.02433	9.12839e-06	9.13877e-05
Gpr176	2.02177	0.000301175	0.00226431
Sprr2i	2.01589	0.00279072	0.0165971
Tlr13	2.00545	5.21486e-09	8.14459e-08
Tnfrsf26	2.00377	0.000729886	0.00510709
Arhgap8	2.00306	1.28842e-05	0.000126122
Gsdma3	1.994	9.84571e-09	1.49202e-07
Tgtp1	1.9905	2.26884e-07	2.83159e-06
Klk10	1.98742	3.76938e-76	5.49309e-74
Fam167b	1.98594	0.00614534	0.0331042
Cd53	1.98449	3.93149e-35	2.70213e-33
Serpina3g	1.98266	1.22371e-26	6.09717e-25
B430306N03Rik	1.98185	0.00283373	0.0168116
Scimp	1.96382	0.00502921	0.0277947
Serpina1b	1.9618	2.50804e-14	6.43852e-13
Samd12	1.96159	0.000672309	0.00473499
Isg15	1.95868	3.46671e-13	8.15435e-12
Fhl2	1.95485	1.7126e-09	2.83949e-08
Cxcr4	1.9548	3.19598e-13	7.5542e-12
Syt13	1.95121	1.52233e-07	1.95791e-06
Gm11545	1.9511	0.00956882	0.0483732
Fxyd4	1.95026	0.0028241	0.0167647
Slamf8	1.94425	0.00165802	0.0106094
Gpr65	1.93179	0.00225592	0.0139072
Fgr	1.91959	2.22944e-08	3.23194e-07
Bub1	1.91748	5.35172e-09	8.34489e-08
Pla2g4b	1.91385	9.59071e-11	1.85147e-09
Marcksl1-ps3	1.91026	0.000732534	0.00511823
Elf5	1.90782	0.000296924	0.00223755
Nfkbie	1.90657	4.18342e-15	1.14363e-13
AF251705	1.90209	2.24554e-07	2.80613e-06
Endou	1.89857	2.62355e-82	4.168e-80
Bst1	1.89551	6.27784e-10	1.10315e-08
Gbp2b	1.89363	1.09434e-35	7.6572e-34
Plk1	1.88503	1.03185e-14	2.73215e-13
Aif1	1.88476	8.60826e-09	1.31374e-07
Timp1	1.88421	2.56435e-14	6.56568e-13
Batf	1.88156	0.00443456	0.0250293
Mmp3	1.87894	5.3809e-46	4.71912e-44
Ifi47	1.87607	3.68049e-15	1.01617e-13
C3ar1	1.87485	2.85186e-27	1.45844e-25
Stx11	1.87216	2.77015e-08	3.96537e-07
Rsad2	1.865	2.13317e-09	3.46564e-08
Pyhin1	1.86389	0.000500119	0.00359811
Rtn4rl2	1.85321	0.000808597	0.00559323
Ctse	1.84916	0.000166038	0.00132216
Fcgr2b	1.84753	5.06389e-60	5.84217e-58
Traf1	1.84743	1.53338e-07	1.96951e-06
Cxcr2	1.84697	1.08255e-12	2.44545e-11
Gpr132	1.8456	1.10061e-05	0.000109283
Slfn2	1.84223	1.31573e-22	5.55589e-21
Cyp7b1	1.83621	3.80358e-06	4.0506e-05
Ptprz1	1.8348	3.69078e-11	7.35953e-10
Clcf1	1.8259	0.00163949	0.0105082
Padi4	1.82489	1.48374e-09	2.48127e-08
Il4i1	1.82265	0.000334381	0.00249748
Sgol2	1.82056	5.62677e-08	7.78431e-07
Hbegf	1.8192	6.7617e-11	1.3145e-09
Trem2	1.81805	7.56187e-10	1.31095e-08
AB124611	1.81744	1.08174e-06	1.23187e-05
Msr1	1.81511	7.00331e-08	9.5523e-07
Rpl12	1.81402	1.71863e-11	3.51007e-10
Ctss	1.81346	1.15509e-92	2.03526e-90
Aqp3	1.81133	9.10614e-264	3.60194e-261
Itgal	1.80844	2.33986e-07	2.91086e-06
Clec4a2	1.80816	3.72012e-10	6.71979e-09
1700055N04Rik	1.80586	5.40895e-08	7.49902e-07
Ccnb2	1.80511	3.98341e-14	1.00924e-12
Cdk1	1.80221	3.12828e-18	1.03822e-16
Cenpe	1.79867	4.25704e-13	9.92899e-12
Crabp2	1.79506	5.15799e-55	5.40391e-53
Sprr2d	1.79319	1.50617e-11	3.08917e-10
Pdpn	1.79179	3.21352e-31	1.92236e-29
Iigp1	1.78948	7.24062e-26	3.4481e-24
Marcksl1	1.78803	2.29547e-39	1.75161e-37
Pf4	1.78322	1.50459e-28	8.19154e-27
Ube2c	1.77918	1.77514e-15	4.99359e-14
Gm4841	1.77563	0.00779285	0.0406899
Birc5	1.76903	4.54647e-16	1.32113e-14
Mybl2	1.76784	6.30391e-09	9.75118e-08
Shcbp1	1.76451	1.2936e-06	1.45941e-05
Fcer1g	1.75833	1.85756e-28	1.00568e-26
Igtp	1.75808	5.49312e-21	2.13362e-19
Gpr114	1.75699	0.000241048	0.00184956
Fanca	1.75501	6.4927e-05	0.000561792
Nuf2	1.75436	4.65949e-09	7.31849e-08
Adamts4	1.75163	0.000153057	0.00122584
Nfkb2	1.7511	2.45252e-63	2.95247e-61
Bub1b	1.74486	2.78513e-16	8.22886e-15
Fcgr3	1.74257	2.26068e-33	1.43191e-31
Ada	1.74238	1.31062e-07	1.70716e-06
Ncapg	1.74093	1.9445e-08	2.8444e-07
Snx20	1.73916	0.000135127	0.00109766
Lair1	1.73736	0.00256895	0.0154632
Rhoh	1.73449	0.00394578	0.0226599
Icam1	1.7279	1.49248e-34	9.97493e-33
Exoc3l4	1.72429	0.00190418	0.0120061
Slc34a2	1.72359	2.35168e-15	6.57724e-14
Glrx	1.72323	1.50196e-103	2.82632e-101
Ccl22	1.72224	6.98919e-06	7.15607e-05
Clec4a3	1.72044	1.36649e-12	3.05835e-11
Kif2c	1.71857	2.72247e-09	4.37173e-08
Ehf	1.71752	9.21002e-22	3.75808e-20
Parpbp	1.71539	0.000427668	0.00311853
2810417H13Rik	1.71482	2.01837e-12	4.42534e-11
Cdkn3	1.70685	0.0007831	0.00543626
Nek2	1.70522	1.09089e-08	1.64669e-07
Cenpa	1.70376	1.09705e-15	3.11774e-14
Lcp2	1.70213	6.43777e-10	1.13023e-08
Vcam1	1.70159	3.1258e-10	5.7209e-09
Ccnb1	1.69853	7.18871e-20	2.60921e-18
Ier3	1.69708	3.21188e-31	1.92733e-29
Ms4a6b	1.69357	4.26431e-09	6.71959e-08
Dclk1	1.69171	1.3995e-28	7.6409e-27
Sgpp2	1.68978	1.92109e-10	3.57682e-09
Csrnp1	1.68684	2.34304e-21	9.26792e-20
Ly86	1.68519	2.07084e-09	3.3757e-08
Cep55	1.68335	1.17917e-07	1.55052e-06
Bcl3	1.6819	1.91377e-11	3.90039e-10
Gm8995	1.67971	8.31744e-12	1.74847e-10
Il10ra	1.67827	3.02631e-15	8.40342e-14
Alox12e	1.67724	1.0467e-177	2.89815e-175
Cdc20	1.67562	1.09389e-21	4.44482e-20
Gbp8	1.67465	0.00210699	0.0131226
P4ha3	1.66978	0.00320529	0.0187405
Klk9	1.66912	4.50269e-51	4.40763e-49
Klk8	1.66819	7.05053e-64	8.54084e-62
Susd3	1.66499	0.0021157	0.0131642
Depdc1b	1.65937	0.00155926	0.0100471
Kif11	1.65745	8.09838e-15	2.174e-13
Gbp5	1.65571	5.14282e-09	8.03855e-08
Mlkl	1.65504	8.34213e-07	9.67028e-06
Mcm10	1.65471	1.28457e-05	0.000125809
Syt8	1.65379	3.11961e-05	0.000286832
Hk3	1.64797	6.31836e-07	7.45812e-06
Aurka	1.64656	4.64776e-10	8.28729e-09
Cd163	1.64595	1.58837e-74	2.24713e-72
Lgmn	1.64533	2.75139e-123	5.86016e-121
Rad54l	1.6439	0.000453957	0.00328796
Glipr1	1.64128	0.00303676	0.0178792
Wfdc17	1.64075	4.50801e-23	1.94165e-21
Top2a	1.62899	2.46378e-50	2.37577e-48
Melk	1.62412	1.47489e-07	1.89942e-06
Spag5	1.62301	9.48969e-09	1.44032e-07
Apobec1	1.62064	1.36587e-23	5.97592e-22
Aurkb	1.61587	1.02844e-09	1.75469e-08
C5ar1	1.61353	1.7866e-09	2.95209e-08
Ska1	1.61286	0.00151948	0.00983983
Kif14	1.6116	8.74273e-06	8.79354e-05
Hmmr	1.61018	5.31197e-11	1.04419e-09
Iqgap3	1.60539	1.41061e-12	3.14982e-11
Pttg1	1.60299	4.36551e-09	6.86789e-08
Bdkrb2	1.60274	3.67359e-05	0.00033428
Pira2	1.60212	1.17131e-05	0.000115592
Gm12250	1.60019	9.29509e-05	0.000778554
Tgtp2	1.59642	9.78663e-11	1.88179e-09
Mcoln2	1.59642	5.14164e-06	5.37226e-05
Ccl19-ps1	1.59559	0.00238495	0.0145454
Kcnn4	1.59511	0.00431324	0.02448
Tmem95	1.59232	0.00605152	0.0326988
Ccr2	1.58998	5.34954e-32	3.25031e-30
Smim3	1.58665	3.80417e-05	0.000344866
Amica1	1.58605	1.70536e-08	2.50784e-07
Fam83a	1.585	1.42887e-06	1.60547e-05
Oasl1	1.58478	4.6656e-05	0.000415191
Ercc6l	1.58147	7.11126e-05	0.000610409
Gm21320	1.58033	1.40112e-85	2.26304e-83
Dsc2	1.57838	1.51232e-17	4.82102e-16
Ccl6	1.57608	1.91446e-56	2.07296e-54
Ripk3	1.5697	4.55742e-11	9.00427e-10
B4galnt1	1.56864	1.5394e-40	1.23804e-38
Cdca8	1.56817	1.6628e-12	3.69169e-11
Areg	1.56675	0.00423109	0.0240701
Il27ra	1.56643	0.0040618	0.0232161
Ndc80	1.56507	6.60387e-05	0.000570139
Ifi44	1.56454	2.90208e-09	4.64477e-08
Vash2	1.56062	0.00516233	0.0284655
Tpx2	1.56035	5.94268e-17	1.81674e-15
Kif20a	1.55822	4.02319e-15	1.10293e-13
Mastl	1.55506	6.2937e-05	0.000546281
Ska3	1.55352	0.00066104	0.00465901
Tyrobp	1.55248	4.26817e-24	1.90612e-22
Nod2	1.55166	1.01406e-13	2.50057e-12
Ifi202b	1.55108	1.36943e-21	5.48393e-20
Spc25	1.54984	2.56827e-05	0.000239203
Cd4	1.54956	0.00244672	0.0148288
Cks2	1.54897	3.33959e-10	6.08917e-09
Ncf1	1.54688	2.8211e-15	7.84486e-14
Ccna2	1.54609	6.30014e-22	2.60361e-20
Spdl1	1.54409	0.000141235	0.00114249
Tacc3	1.54026	2.5997e-16	7.69272e-15
Ifi44l	1.53882	1.67253e-05	0.000160799
Kif18b	1.53861	4.07584e-07	4.92813e-06
Tmem176a	1.53796	3.88789e-22	1.62754e-20
Kif15	1.53618	2.05455e-07	2.58245e-06
Arg2	1.53272	5.02325e-05	0.000444976
Ankle1	1.53231	0.000337886	0.00251881
Slc39a2	1.52749	0.00016981	0.00134722
Pla2g7	1.52558	3.12314e-18	1.0383e-16
Fscn1	1.5248	6.6248e-25	3.0427e-23
Lcn2	1.52096	4.09065e-05	0.000368767
Aoah	1.51709	0.00926309	0.0470979
Cgref1	1.51672	6.19935e-05	0.000539057
Cass4	1.51669	0.00320219	0.0187337
Sgol1	1.51527	0.000137714	0.00111728
Clec5a	1.51358	0.00883247	0.0451334
Dbf4	1.51354	2.25468e-08	3.26609e-07
Prss27	1.51318	3.86132e-07	4.68923e-06
Kif24	1.51259	0.00043863	0.00318887
Mx1	1.51089	7.88733e-05	0.000671671
Prr11	1.50872	5.26766e-07	6.27522e-06
Car2	1.50854	7.93772e-05	0.00067448
Tnfaip6	1.50801	2.07487e-05	0.000196172
Tdh	1.50522	1.55123e-11	3.17486e-10
Saa3	1.50499	0.000109193	0.000901351
Pif1	1.50162	0.000309403	0.00232166
Mpeg1	1.49965	9.63952e-40	7.53359e-38
Casc5	1.49752	2.22347e-05	0.000209404
Arl11	1.49668	0.00390096	0.0224092
Ncaph	1.49365	7.80861e-08	1.05763e-06
Ticrr	1.49271	0.000147675	0.00118814
Mmp12	1.49216	0.000529782	0.00378902
Dlgap5	1.49114	2.2791e-06	2.49709e-05
Mt2	1.48874	7.74245e-72	1.03493e-69
Serpinb12	1.48666	1.11237e-16	3.35825e-15
Themis2	1.48629	2.18656e-09	3.54643e-08
Mmp11	1.48515	1.84957e-14	4.81832e-13
Gpx2	1.48457	0.000114797	0.0009408
Il1rl1	1.48198	2.73446e-06	2.96086e-05
Evi2b	1.47873	9.93617e-08	1.31996e-06
Cd300a	1.47593	7.94862e-11	1.54214e-09
Ncf2	1.47504	5.86118e-13	1.3524e-11
Nckap1l	1.47494	1.23595e-22	5.23039e-21
Cyba	1.47154	1.81812e-17	5.76739e-16
Lrp8	1.47105	0.00441841	0.0249672
Aspm	1.46952	5.90791e-09	9.16057e-08
Rac2	1.46862	1.19364e-13	2.91374e-12
Prss22	1.46751	2.28966e-06	2.50441e-05
Knstrn	1.46656	3.1191e-09	4.96749e-08
Ctsc	1.4665	3.71045e-72	5.0645e-70
Rrm2	1.46046	9.17037e-19	3.13475e-17
Pik3r5	1.46008	1.81754e-09	2.99554e-08
Lrrc25	1.45946	8.93006e-05	0.000749599
Bin2	1.45789	0.000186789	0.00147168
Mis18bp1	1.45622	0.000195219	0.00153188
Serpinb11	1.45219	4.39645e-05	0.000393771
Csf2rb	1.44954	1.52396e-30	8.8701e-29
Brca1	1.4477	3.40317e-05	0.000311721
Fam64a	1.44733	0.000342454	0.00254894
Gm6551	1.4441	2.09035e-18	7.00955e-17
Troap	1.43815	0.00115605	0.00771575
Klk7	1.43651	1.94266e-183	5.4569e-181
Vav1	1.43581	2.44834e-08	3.53868e-07
Stac2	1.43553	0.000399959	0.00293303
Gen1	1.43457	0.00481665	0.0268342
Ttc22	1.43382	9.87324e-10	1.68751e-08
Gmfg	1.43371	3.71492e-05	0.000337723
Kif22	1.43268	1.03715e-08	1.5668e-07
Cdca5	1.43174	0.000289618	0.00218845
Irf8	1.43154	4.04238e-14	1.02284e-12
Mki67	1.43097	1.39651e-52	1.40244e-50
Cd200r1	1.42748	0.00056724	0.00403606
Depdc1a	1.42378	0.00119296	0.00793753
Cd300lh	1.42024	2.95702e-13	7.02364e-12
Gsta1	1.41881	0.0070612	0.0373935
Fblim1	1.41711	8.57298e-09	1.30939e-07
Hck	1.41636	0.000245944	0.0018834
Tnfrsf13b	1.41632	0.00111117	0.00744444
Selplg	1.41478	4.16314e-13	9.72168e-12
Ect2	1.41357	3.54276e-08	5.00479e-07
Tnfrsf1b	1.41332	2.74114e-20	1.01585e-18
Slc11a1	1.41147	2.05546e-09	3.36194e-08
Enah	1.41055	7.31209e-21	2.81755e-19
Smc2	1.41026	1.21431e-11	2.51719e-10
Prc1	1.40965	1.50899e-17	4.81834e-16
E2f8	1.40491	1.53772e-08	2.2682e-07
Atp8b4	1.40375	0.00881491	0.0450555
Slc2a6	1.40168	0.00264322	0.0158413
Clec12a	1.39873	0.00117459	0.00782872
Cd68	1.39332	1.65998e-33	1.06184e-31
Rrad	1.39248	0.000927438	0.00630501
Adamts15	1.39044	4.14627e-09	6.54955e-08
Cotl1	1.38789	9.63149e-34	6.22259e-32
Tifab	1.38717	5.85845e-07	6.93637e-06
P2ry6	1.3862	2.4798e-08	3.57615e-07
Stil	1.38467	0.00236712	0.0144548
Has2	1.38421	0.000257637	0.00196828
Il33	1.3841	1.8146e-39	1.39566e-37
Rgs4	1.3841	1.69474e-06	1.88346e-05
Gm4419	1.38403	0.000534232	0.00381802
Clec4a1	1.3834	1.90121e-10	3.54319e-09
Irgm2	1.38195	2.0912e-16	6.22607e-15
LOC101055843	1.38175	8.93686e-20	3.22559e-18
Cd48	1.37987	5.61623e-06	5.83666e-05
Gbp3	1.37291	6.91259e-10	1.20486e-08
Pbk	1.37157	1.44005e-05	0.000140045
Kif20b	1.37155	3.14817e-05	0.000289184
Slc7a7	1.37121	1.41749e-06	1.59361e-05
Slc10a6	1.37101	6.77119e-07	7.97806e-06
Ccl19	1.37067	0.00467718	0.0262382
Cenpn	1.37047	0.00219559	0.0135828
Nt5dc2	1.36732	1.64443e-14	4.30127e-13
Cdc25c	1.36684	0.000825203	0.00568982
Mrc1	1.36489	2.56121e-74	3.57132e-72
Tmem26	1.36319	0.00616578	0.0331774
Rad51ap1	1.36297	0.00272161	0.0162458
Tmem173	1.3615	4.96464e-10	8.81178e-09
Colq	1.35953	0.00441898	0.0249632
Igsf6	1.35837	0.000105701	0.00087589
Gbp6	1.35831	1.62188e-16	4.86613e-15
Zwilch	1.35715	5.02685e-05	0.000445091
Ccnf	1.35677	1.2726e-10	2.42532e-09
Hp	1.35637	2.48277e-155	6.16936e-153
C330027C09Rik	1.35602	1.87278e-07	2.36779e-06
Emr1	1.35594	1.34303e-19	4.78503e-18
Tmem176b	1.35563	1.17814e-34	7.90131e-33
Cstb	1.3546	1.73452e-53	1.77875e-51
Spi1	1.35181	4.95376e-10	8.80052e-09
Ugt1a7c	1.35057	1.47483e-07	1.9006e-06
Gsap	1.35009	0.000169891	0.00134731
Plet1	1.34906	4.34584e-17	1.33913e-15
Laptm5	1.34637	6.92757e-63	8.28828e-61
Alox5ap	1.34262	2.44997e-14	6.29779e-13
AI662270	1.34219	0.000411075	0.00300885
Anln	1.34036	6.41397e-18	2.08583e-16
Gm21188	1.33741	0.000602965	0.00427457
Oas3	1.33714	5.20461e-05	0.000459571
Fanci	1.33522	0.00157423	0.0101267
Irf1	1.33186	1.06717e-24	4.85538e-23
Tk1	1.33146	9.6374e-11	1.85678e-09
Cxcl16	1.32934	8.09149e-30	4.58565e-28
Akr1b8	1.32798	1.77841e-12	3.93035e-11
Birc3	1.32548	9.16106e-17	2.77871e-15
Ccl9	1.32421	2.58889e-25	1.21791e-23
Rad51	1.32413	0.000152463	0.0012221
Slc26a9	1.32286	1.00889e-06	1.15501e-05
Racgap1	1.31988	5.45594e-14	1.36978e-12
Gm10184	1.31919	3.57462e-34	2.34065e-32
Oas1a	1.31903	2.21481e-08	3.21313e-07
Ass1	1.31728	5.80413e-12	1.22946e-10
Ammecr1	1.31673	8.00269e-08	1.08089e-06
Ly9	1.3163	0.00349469	0.0203161
Nfil3	1.31349	1.74447e-05	0.0001673
Ckap2	1.31313	1.21267e-07	1.58703e-06
Kifc1	1.3078	2.12248e-05	0.00020038
Cd300lb	1.30605	0.00048408	0.00349049
Hpgd	1.30415	1.40573e-09	2.35691e-08
Diap3	1.30392	0.000207953	0.0016213
Ccdc88b	1.3034	3.95679e-05	0.000357198
Zbp1	1.30293	4.43107e-07	5.32442e-06
Glipr2	1.30229	5.42056e-07	6.44548e-06
Spc24	1.30105	1.99984e-05	0.000189725
Asf1b	1.2968	1.23803e-05	0.000121619
Trex2	1.2965	2.74221e-25	1.28691e-23
Mad2l1	1.29413	7.13159e-07	8.38232e-06
Gm4951	1.29372	0.00193289	0.0121437
Foxm1	1.29344	1.85733e-10	3.47813e-09
Fyb	1.2917	1.54531e-09	2.57755e-08
Lyn	1.29136	5.20183e-11	1.02357e-09
Tlr6	1.2885	0.000228476	0.00176639
Cdca3	1.28619	1.39904e-07	1.80414e-06
C1qtnf6	1.28565	2.37962e-12	5.20563e-11
Gm10052	1.28488	4.79263e-05	0.000425714
Socs1	1.28382	0.000576096	0.00409457
Serpinb3b	1.28343	3.03325e-28	1.62405e-26
Lpxn	1.28319	0.0073431	0.0387171
Pmaip1	1.28283	1.49304e-05	0.000144618
Poc1a	1.2804	0.00993438	0.0498442
Rtp4	1.27772	9.31893e-08	1.24222e-06
4632434I11Rik	1.27702	0.00735426	0.0387548
Has3	1.27274	6.00692e-06	6.20609e-05
Exo1	1.2716	0.00984084	0.0494517
Mcm5	1.27105	4.9623e-20	1.81813e-18
Syk	1.27063	6.37946e-19	2.18844e-17
Ptprc	1.2697	2.49771e-17	7.83343e-16
Nusap1	1.26478	2.03656e-08	2.97233e-07
Cd84	1.26339	1.15135e-07	1.51806e-06
Samhd1	1.26322	3.161e-57	3.44194e-55
Ccne1	1.26282	0.00165582	0.0106023
Casp8	1.2622	4.84108e-16	1.40464e-14
Dhx58	1.26074	0.000103842	0.000861583
Oas1g	1.25909	0.000903153	0.00616153
Tlr9	1.25482	0.00799262	0.0415428
2310046K23Rik	1.2489	1.22571e-92	2.14024e-90
Irgm1	1.24783	3.05565e-13	7.24017e-12
Gm11711	1.24643	7.23221e-07	8.49544e-06
Smox	1.24071	3.67925e-21	1.44648e-19
Sash3	1.2371	0.000103718	0.00086093
Naip2	1.23693	0.00371032	0.0214283
Il18r1	1.2366	2.08711e-05	0.000197233
Relt	1.23635	0.00198206	0.0124164
Gbp4	1.23615	3.93482e-17	1.21828e-15
Efhd2	1.2361	5.98669e-27	3.02172e-25
Il1f8	1.23493	9.16016e-07	1.05366e-05
Clspn	1.2339	2.26955e-05	0.000213329
Cdca2	1.23387	0.000267011	0.00203428
Slfn9	1.23108	7.76934e-10	1.34331e-08
Ctla2a	1.22849	3.7582e-09	5.94623e-08
Gbp2	1.22692	9.83403e-17	2.97817e-15
Zmynd15	1.22449	0.000375111	0.00276757
Tubb6	1.22326	2.5492e-23	1.10782e-21
Cenpm	1.22323	0.00798404	0.0415093
LOC102638104	1.22291	2.35485e-10	4.35928e-09
Traip	1.22109	0.00364066	0.0210574
Coro1a	1.21976	6.36406e-16	1.82468e-14
F630028O10Rik	1.21937	0.00013585	0.00110307
Tifa	1.21875	1.72251e-05	0.00016544
Cybb	1.21731	3.70394e-15	1.01974e-13
E2f7	1.21587	0.00164097	0.0105142
Kif4	1.21496	7.99029e-06	8.10402e-05
Pik3ap1	1.21283	2.45202e-08	3.54136e-07
Slc37a2	1.21024	2.03598e-17	6.44793e-16
Ticam2	1.20461	0.00960497	0.0484801
Igsf3	1.20301	7.89301e-15	2.12181e-13
Bend4	1.20292	0.00136947	0.00900683
Tnfaip8l2	1.20177	3.48681e-05	0.00031893
Ccdc152	1.20085	0.00837963	0.0431722
Ecscr	1.19929	4.26192e-06	4.5016e-05
Parp14	1.19896	1.71442e-21	6.85133e-20
Gla	1.19731	1.17917e-05	0.000116191
Car4	1.19616	0.00043856	0.00318955
Abcg1	1.19599	1.98398e-14	5.16155e-13
Pstpip1	1.19569	0.000107037	0.00088582
Tslp	1.19077	0.00248711	0.0150359
Gyk	1.18962	8.80216e-10	1.5111e-08
S1pr3	1.18953	1.52193e-05	0.000147122
Nxpe5	1.18916	4.82121e-07	5.77532e-06
Psmb10	1.18898	6.23175e-13	1.4277e-11
Gm14548	1.18719	1.8171e-05	0.000173664
Kif23	1.18671	5.50267e-08	7.61805e-07
Mxd3	1.18519	0.00484101	0.026939
Lcp1	1.18365	1.25812e-36	8.93221e-35
Gzmc	1.18176	0.00186098	0.0117682
Tubb2a	1.17914	2.16607e-33	1.37648e-31
Ivl	1.17891	3.11401e-44	2.62416e-42
Myo5b	1.17544	1.10614e-10	2.1185e-09
Itgam	1.17212	1.62282e-15	4.57174e-14
Junb	1.17171	9.35694e-53	9.49509e-51
Myo1f	1.17083	2.18472e-09	3.54641e-08
Gnpda1	1.17017	3.44119e-12	7.4273e-11
Gcnt1	1.16871	0.000605325	0.00428973
Tlr8	1.16823	0.0046366	0.0260332
Trip13	1.16804	0.00141777	0.00927724
LOC215866	1.16728	8.00818e-14	1.98993e-12
Oas2	1.16666	3.11274e-09	4.96145e-08
Sfn	1.16652	5.51927e-257	2.13949e-254
Arhgap4	1.16614	0.000106535	0.000882041
Esco2	1.16499	0.00354174	0.0205342
Gch1	1.15912	0.00236876	0.0144603
Hcls1	1.15862	2.47874e-08	3.57729e-07
Pira1	1.15758	0.000730089	0.00510667
Cyth4	1.15725	6.17126e-14	1.54537e-12
Mfge8	1.15579	2.17069e-57	2.37696e-55
Pik3cd	1.15568	6.74072e-10	1.17808e-08
Unc93b1	1.15468	1.73004e-29	9.69122e-28
Cnrip1	1.15453	0.000265183	0.00202114
Ncapg2	1.15413	7.55217e-08	1.02504e-06
Tnfaip3	1.15271	6.60565e-10	1.15551e-08
Irf7	1.15117	2.83063e-13	6.73169e-12
Gbp7	1.15092	5.14043e-12	1.09245e-10
Tmem86a	1.14692	8.32481e-21	3.18876e-19
Kntc1	1.1469	0.000276187	0.0020976
Dsn1	1.14504	0.00211697	0.0131678
Prune2	1.14486	5.54979e-06	5.77071e-05
Lxn	1.14457	6.98035e-08	9.52768e-07
Incenp	1.14432	5.48779e-11	1.07765e-09
Cenpi	1.14211	0.00203024	0.0126854
Sele	1.141	3.87232e-05	0.000350062
Tmem229b	1.14027	1.25969e-17	4.0356e-16
Tnfrsf23	1.13899	2.58968e-06	2.81668e-05
Lilra6	1.13819	0.00219556	0.013587
Csf2rb2	1.13704	4.33304e-14	1.09353e-12
Rps29	1.1365	2.43686e-09	3.93265e-08
Cmtm7	1.13513	1.62009e-05	0.000155912
2700094K13Rik	1.13482	4.30331e-07	5.18376e-06
Ncf4	1.1317	2.27629e-05	0.000213858
Nme1	1.13088	8.0836e-21	3.10866e-19
Kcnip3	1.13055	0.0005498	0.00391773
Sepp1	1.12985	0	0
Cenpf	1.12708	9.26311e-08	1.23563e-06
Slc43a2	1.12136	1.31327e-18	4.45774e-17
Dna2	1.12127	0.00141931	0.00928105
Gcnt4	1.12029	0.00510114	0.0281601
Hells	1.11992	7.60845e-05	0.000649921
Entpd7	1.11888	0.000680792	0.00478604
Elovl7	1.11803	4.54315e-49	4.21317e-47
Cd52	1.11263	3.63434e-06	3.88961e-05
Ctsh	1.11086	4.73841e-36	3.32753e-34
AW112010	1.11021	8.67506e-05	0.000730091
Fcgbp	1.11002	2.06694e-140	4.6583e-138
Rnf19b	1.10828	6.23757e-21	2.4131e-19
Sla	1.1056	0.000767235	0.0053376
Rad18	1.10553	0.00403091	0.0230667
Myo1g	1.10399	1.11257e-06	1.264e-05
Lmnb1	1.10205	6.72201e-11	1.30809e-09
Gtse1	1.10051	0.00253173	0.0152818
Urah	1.10003	2.17271e-35	1.49863e-33
Lyz2	1.09733	1.2051e-121	2.53882e-119
Oasl2	1.0959	3.856e-11	7.66533e-10
Bst2	1.09582	1.88812e-10	3.52558e-09
Cnfn	1.09321	2.8717e-39	2.17419e-37
Adam12	1.09216	4.6046e-07	5.52609e-06
Gm6407	1.09198	0.0050646	0.0279744
Cd209e	1.08817	0.00636803	0.0341236
Gmnn	1.08756	0.000289927	0.00218993
Tuba1c	1.08452	4.99176e-48	4.58532e-46
Kifc5b	1.0841	0.00477423	0.0266438
Dhrs9	1.08365	0.00542749	0.0297331
Ddx58	1.08309	2.1656e-11	4.409e-10
Bard1	1.08231	0.00989706	0.0496956
Mapk6	1.08215	1.54418e-33	9.91039e-32
Inpp5d	1.08211	3.3278e-09	5.2825e-08
Pgam1-ps2	1.07892	1.29204e-10	2.45754e-09
Tlr2	1.07704	0.000113122	0.000928648
Smpdl3b	1.07657	0.000238107	0.00183208
Gadd45b	1.0759	2.11308e-09	3.43877e-08
Blmh	1.07413	3.58865e-74	4.96822e-72
Porcn	1.07039	5.09069e-06	5.32475e-05
Bace2	1.07001	2.15166e-07	2.69576e-06
Was	1.06941	0.0025902	0.0155717
Pirb	1.06923	2.4106e-13	5.77531e-12
Arhgap11a	1.06828	1.13819e-06	1.29008e-05
Cit	1.06716	0.000629687	0.0044445
Cfb	1.06684	1.12443e-27	5.90616e-26
Arrb2	1.06593	5.5583e-11	1.08709e-09
Cd44	1.06564	3.24527e-65	4.03204e-63
Mcm3	1.06318	9.60065e-11	1.85154e-09
C3	1.06314	1.34639e-203	4.01473e-201
Krt14	1.05945	0	0
Itgb2	1.05836	2.02573e-09	3.31891e-08
Ckap4	1.05835	3.00076e-23	1.30113e-21
Ctsz	1.05665	3.5847e-28	1.90353e-26
Ckap2l	1.0564	1.17626e-07	1.54774e-06
H2afz	1.05605	2.12589e-30	1.22997e-28
Plk4	1.05484	0.000198917	0.00155711
Stab1	1.05387	6.06033e-46	5.26732e-44
Blm	1.05219	0.00432756	0.0245397
Cks1b	1.04948	1.17792e-05	0.000116186
Trim30a	1.04904	3.88129e-07	4.70758e-06
C1qb	1.04826	3.70688e-25	1.71882e-23
Apobec3	1.04668	0.00285241	0.0169069
Gsdmd	1.04661	5.06963e-07	6.05793e-06
Gpx1	1.04604	3.48515e-89	5.8232e-87
E130012A19Rik	1.04511	0.00823231	0.0425603
Slfn8	1.04509	0.000997697	0.00672838
Gbp10	1.04398	1.58391e-05	0.000152657
Il18bp	1.04315	0.00368379	0.0212941
Tlr7	1.04009	0.00140652	0.00920983
Tnip1	1.03786	4.10487e-17	1.26891e-15
Ptafr	1.03694	6.22371e-05	0.000540932
Hmha1	1.03553	3.25773e-14	8.30806e-13
Cytip	1.03252	0.000793328	0.00549939
Fam43a	1.03164	2.82259e-13	6.72083e-12
Slc4a7	1.03157	6.53194e-06	6.70561e-05
Bak1	1.02874	7.07638e-10	1.2323e-08
Mmp19	1.02778	4.36697e-10	7.80817e-09
Gpr34	1.02754	0.0029087	0.0172037
Dsg2	1.02736	7.92139e-10	1.36716e-08
Stat1	1.02647	2.03746e-26	1.0074e-24
Ctsl	1.02625	6.30772e-115	1.28691e-112
Ptpn18	1.0213	0.00140294	0.0091957
Susd1	1.02038	0.000286527	0.00216678
Fbxo5	1.02001	0.00268551	0.01606
Sult2b1	1.0175	4.09591e-16	1.19559e-14
Aox4	1.01746	1.02518e-17	3.28974e-16
Cst6	1.01724	2.00039e-164	5.31117e-162
Arhgap9	1.0129	3.78791e-05	0.000343553
Casp4	1.01215	0.000191071	0.00150298
Fen1	1.01105	4.53058e-06	4.75429e-05
Dsg1b	1.01029	1.40662e-59	1.60371e-57
Cd276	1.00638	4.66919e-06	4.8918e-05
Gpsm3	1.00619	0.000263798	0.00201138
Fam105a	1.0051	5.51097e-06	5.73342e-05
Nmi	1.00455	0.000543743	0.00387742
Fam162a	1.00278	3.08683e-19	1.078e-17
Fmnl1	1.00275	6.48507e-08	8.89552e-07
Il1f9	1.00244	1.70987e-17	5.43291e-16
Nfam1	1.00241	2.61679e-06	2.84138e-05
Fermt3	1.00134	5.57978e-07	6.62668e-06
Ifit1	1.00108	0.000451462	0.00327111
Tmem51	1.00015	1.28892e-05	0.000126107
