# Supplementary material for: Loss of epidermal microRNA-149 sensitizes to skin inflammation
Source: Research Square preprint supplement (doi:10.21203/rs.3.rs-6047392/v1), 2025-07-29
Supplement: Supplementary file 1 [file 054e8704642a78630d324d9b.pdf]

## Token Access for Review of GEO Submission GSE287498

Dear Editor,

We wish to inform you that our GEO submission to the GEO repository has not yet been publicly released. To facilitate the review process, we are providing the token for GSE287498. This token allows reviewers to access our data in GEO without the need to log in to our account.

To review GEO accession GSE287498, please follow these steps:

1. Go to the NCBI GEO access page:  
<https://www.ncbi.nlm.nih.gov/geo/query/acc.cgi?acc=GSE287498>
2. Enter the following token into the provided box: **ezslwywwfhwhvgf**

We appreciate your attention to our submission.

Sincerely yours,

Enikő Sonkoly, MD, PhD  
Professor of Dermatology & Venereology  
Department of Medical Sciences  
Uppsala University
