# Supplementary material for: Loss of epidermal microRNA-149 sensitizes to skin inflammation
Source: Research Square preprint supplement (doi:10.21203/rs.3.rs-6047392/v1), 2025-07-29
Supplement: Supplementary file 2 [file 0f692193c8fee5def28fab0c.pdf]

## **Description of Additional Supplementary Files**

### **Supplemental Data Legends**

**Supplemental Data S1** shows differentially expressed genes (DEGs) in *Mir149<sup>EKO</sup>* versus WT keratinocytes.

**Supplemental Data S2** lists 707 experimentally validated miR-149 targets from RNAcentral.

**Supplemental Data S3** includes 3591 DEGs from bulk RNA-seq of psoriasis versus healthy epidermis (GSE274560).

**Supplemental Data S4** shows 1086 DEGs from bulk RNA-seq of IMQ-treated back skin in *Mir149<sup>EKO</sup>* versus WT.

**Supplemental Data S5** lists 354 enriched biological processes from GSEA analysis of the IMQ transcriptome.

**Supplemental Data S6** details 807 DEGs from mice with subcutaneous Tweak injection compared to controls (GSE96957).

**Supplemental Data S7** and **S8** present the top 50 cluster-specific gene signatures for keratinocytes and immune cells from PBS- or IL-23-injected WT and *Mir149<sup>EKO</sup>* mice, respectively.
