# Supplementary material for: Loss of epidermal microRNA-149 sensitizes to skin inflammation
Source: Research Square preprint supplement (doi:10.21203/rs.3.rs-6047392/v1), 2025-07-29
Supplement: Supplementary file 2 [file 2500472971981a21fcc272df.xlsx]

## Sheet: DEGseq_MARS_IMQ_model_up
Gene (938)	Ensembl Gene ID	log2.Fold_change..normalized	p.value	q.value.Benjamini
Il1b	ENSMUSG00000027398	4.81957	6.96143e-26	4.2517e-24
Cd300lf	ENSMUSG00000047798	3.75136	0.00115083	0.00865331
Sprr2a3	ENSMUSG00000074445	3.46765	1.5855e-28	1.05147e-26
Sprr2d	ENSMUSG00000042212	3.4198	1.48089e-21	7.08445e-20
Sprr2a2	ENSMUSG00000068893	3.31427	2.08428e-226	1.40028e-223
Krt6b	ENSMUSG00000023041	3.10928	0	0
Sprr2a1	ENSMUSG00000078664	3.07053	0	0
Ccl4	ENSMUSG00000018930	3.04945	0.00101098	0.00771443
Tnc	ENSMUSG00000028364	2.98713	5.6162e-114	1.73563e-111
Krt16	ENSMUSG00000053797	2.92707	0	0
S100a9	ENSMUSG00000056071	2.82166	4.6106e-64	7.12429e-62
S100a8	ENSMUSG00000056054	2.71607	5.03317e-167	2.77759e-164
Hdc	ENSMUSG00000027360	2.62555	3.41474e-13	9.61102e-12
Sprr1b	ENSMUSG00000048455	2.57816	1.79742e-75	3.08597e-73
Serpinb3a	ENSMUSG00000044594	2.29218	1.83726e-10	4.05563e-09
Cd4	ENSMUSG00000023274	2.28122	0.000937689	0.00722292
Ccl8	ENSMUSG00000009185	2.04501	1.68539e-29	1.14222e-27
Ccl7	ENSMUSG00000035373	1.96532	4.82977e-06	6.13225e-05
Sprr2h	ENSMUSG00000046259	1.79281	0.000571028	0.00463177
Fcer1g	ENSMUSG00000058715	1.70614	7.47084e-65	1.16606e-62
Sprr1a	ENSMUSG00000050359	1.70004	1.27929e-27	8.23647e-26
Gjb2	ENSMUSG00000046352	1.60632	1.81573e-35	1.52482e-33
Ccl2	ENSMUSG00000035385	1.50703	2.0115e-05	0.000226048
Cd14	ENSMUSG00000051439	1.48159	1.47477e-13	4.25947e-12
Srgn	ENSMUSG00000020077	1.38429	4.83781e-15	1.57046e-13
Cpa3	ENSMUSG00000001865	1.34637	0.000103191	0.00099719
Krt6a	ENSMUSG00000058354	1.32638	0	0
Tnfrsf12a	ENSMUSG00000023905	1.09124	6.42164e-14	1.91929e-12
Cma1	ENSMUSG00000022225	0.988502	2.66127e-06	3.52978e-05
Tpsb2	ENSMUSG00000033825	0.869054	2.65148e-05	0.000287917
Mcpt4	ENSMUSG00000061068	0.860839	1.81183e-06	2.47975e-05
Myh3	ENSMUSG00000020908	3.31548	2.55002e-22	1.27518e-20
Clec4d	ENSMUSG00000030144	3.16965	2.17276e-08	3.8195e-07
Marco	ENSMUSG00000026390	3.07284	7.32052e-13	2.01634e-11
Stfa2	ENSMUSG00000022902	3.0469	3.5545e-22	1.76039e-20
Lce3d	ENSMUSG00000043472	2.74215	6.1978e-05	0.000628814
Slpi	ENSMUSG00000017002	2.63581	3.35719e-08	5.8026e-07
Saa3	ENSMUSG00000040026	2.63449	2.20734e-99	5.59146e-97
Mymk	ENSMUSG00000009214	2.61089	0.00131585	0.00970066
Cstdc6	ENSMUSG00000079594	2.60073	1.75573e-05	0.000200218
Ly6c2	ENSMUSG00000022584	2.56881	0.000411212	0.00342721
Fpr2	ENSMUSG00000052270	2.53199	0.000180485	0.00163186
2610528A11Rik	ENSMUSG00000096001	2.43345	2.70611e-30	1.89207e-28
Slc13a3	ENSMUSG00000018459	2.33969	1.32935e-67	2.18522e-65
Rptn	ENSMUSG00000041984	2.33446	2.27809e-107	6.28589e-105
Adm	ENSMUSG00000030790	2.30306	4.16047e-14	1.26054e-12
Fpr1	ENSMUSG00000045551	2.29672	6.4566e-05	0.0006525
Thbs4	ENSMUSG00000021702	2.28055	2.1749e-83	4.30854e-81
Lce3e	ENSMUSG00000074433	2.26367	0.000190828	0.00171634
Cd300ld5	ENSMUSG00000089722	2.23985	9.24877e-08	1.5107e-06
Stfa1	ENSMUSG00000071562	2.21393	1.73487e-79	3.19133e-77
Il1rl1	ENSMUSG00000026069	2.1715	6.15632e-07	8.93216e-06
Klk13	ENSMUSG00000054046	2.15269	9.93175e-14	2.90654e-12
Prg4	ENSMUSG00000006014	2.15175	6.10756e-26	3.745e-24
Trem2	ENSMUSG00000023992	2.12006	2.18215e-07	3.38201e-06
Tnni1	ENSMUSG00000026418	2.07422	6.75159e-06	8.34604e-05
Eln	ENSMUSG00000029675	2.07263	4.57546e-130	1.68333e-127
Timp1	ENSMUSG00000001131	2.06819	2.77984e-12	7.25575e-11
Cdhr1	ENSMUSG00000021803	2.05929	2.09215e-06	2.82586e-05
Clec4n	ENSMUSG00000023349	2.04434	5.07104e-05	0.000525186
Siglece	ENSMUSG00000030474	2.03259	3.312e-09	6.35739e-08
Cntn2	ENSMUSG00000053024	2.03064	7.75224e-05	0.000770835
Plaur	ENSMUSG00000046223	2.02157	1.70094e-07	2.67647e-06
Lilrb4a	ENSMUSG00000112148	2.02092	2.63028e-08	4.58209e-07
Pou2f2	ENSMUSG00000008496	2.00468	1.13406e-06	1.61209e-05
Gsdmc	ENSMUSG00000079025	1.99947	3.11261e-20	1.41459e-18
Tmem252	ENSMUSG00000048572	1.99934	4.13292e-10	8.73624e-09
Rbp2	ENSMUSG00000032454	1.99141	3.66727e-10	7.78388e-09
Csf3r	ENSMUSG00000028859	1.98467	3.41195e-10	7.30214e-09
Sell	ENSMUSG00000026581	1.96074	0.000844717	0.0065756
Adamts4	ENSMUSG00000006403	1.94286	3.08201e-05	0.000331638
Klk14	ENSMUSG00000044737	1.94072	4.24614e-06	5.45852e-05
Lox	ENSMUSG00000024529	1.93373	2.39035e-61	3.45194e-59
Fcgr1	ENSMUSG00000015947	1.92331	1.05588e-18	4.45777e-17
Ccl21a	ENSMUSG00000094686	1.92264	1.09352e-16	4.03272e-15
Cxcl13	ENSMUSG00000023078	1.9204	2.52728e-10	5.47708e-09
Gja5	ENSMUSG00000057123	1.91718	2.083e-13	5.93847e-12
Tlr1	ENSMUSG00000044827	1.91604	5.62205e-07	8.21096e-06
Sele	ENSMUSG00000026582	1.9029	3.25284e-06	4.26318e-05
Teddm3	ENSMUSG00000090356	1.89856	1.29625e-09	2.60126e-08
Stab1	ENSMUSG00000042286	1.88569	5.24353e-57	7.2342e-55
Cpxm1	ENSMUSG00000027408	1.88345	4.06953e-23	2.11015e-21
Cstdc5	ENSMUSG00000071561	1.88258	0	0
Lyve1	ENSMUSG00000030787	1.88143	1.91053e-16	6.91371e-15
Cd300e	ENSMUSG00000048498	1.849	2.01146e-05	0.000226209
Lcn2	ENSMUSG00000026822	1.82187	4.99809e-30	3.46325e-28
Lgi2	ENSMUSG00000039252	1.82146	1.51911e-06	2.10712e-05
Hmox1	ENSMUSG00000005413	1.81507	7.69996e-76	1.33685e-73
Ms4a4c	ENSMUSG00000024675	1.81317	1.23136e-06	1.73762e-05
Aif1	ENSMUSG00000024397	1.78306	2.1387e-13	6.08605e-12
Oas3	ENSMUSG00000032661	1.77563	2.58264e-05	0.000281432
Cd300ld	ENSMUSG00000034641	1.76915	1.29922e-08	2.34528e-07
Lce3c	ENSMUSG00000045475	1.74022	9.66414e-05	0.000941553
Klk6	ENSMUSG00000050063	1.73209	3.58964e-23	1.87389e-21
Apold1	ENSMUSG00000090698	1.71917	0.0005221	0.00427077
C3ar1	ENSMUSG00000040552	1.71702	3.46668e-24	1.92687e-22
Sgpp2	ENSMUSG00000032908	1.71417	1.14545e-13	3.32073e-12
Col12a1	ENSMUSG00000032332	1.70562	1.25496e-34	1.01527e-32
Pcdh12	ENSMUSG00000024440	1.70519	0.000628987	0.00506467
Hck	ENSMUSG00000003283	1.70362	1.13449e-10	2.55541e-09
Cd209g	ENSMUSG00000079168	1.7002	6.37725e-12	1.61015e-10
Lrrc32	ENSMUSG00000090958	1.69882	1.29311e-21	6.22464e-20
Sirpb1c	ENSMUSG00000074677	1.69639	0.000108194	0.00103968
Ccr1	ENSMUSG00000025804	1.68686	5.38061e-05	0.000553168
Pik3ap1	ENSMUSG00000025017	1.68439	6.31558e-23	3.24214e-21
Spp1	ENSMUSG00000029304	1.6735	4.54616e-10	9.57046e-09
C1qtnf3	ENSMUSG00000058914	1.67171	1.29075e-10	2.88635e-09
Siglec1	ENSMUSG00000027322	1.66681	4.87458e-44	5.19462e-42
Snai1	ENSMUSG00000042821	1.66339	1.71485e-06	2.35118e-05
Pik3r5	ENSMUSG00000020901	1.66034	5.45227e-10	1.14313e-08
Ccdc88b	ENSMUSG00000047810	1.66015	0.000155336	0.00142027
Selp	ENSMUSG00000026580	1.65957	3.32755e-07	5.02122e-06
Milr1	ENSMUSG00000040528	1.65908	0.000115591	0.00110254
Ms4a6d	ENSMUSG00000024679	1.65831	7.17763e-17	2.69196e-15
Cd209f	ENSMUSG00000051906	1.6567	9.06275e-30	6.19636e-28
Itgal	ENSMUSG00000030830	1.65222	6.87088e-07	9.93161e-06
Fgr	ENSMUSG00000028874	1.64794	1.18874e-05	0.000139472
Fcgr4	ENSMUSG00000059089	1.6478	2.79777e-11	6.77604e-10
Cd68	ENSMUSG00000018774	1.64331	9.40531e-43	9.62456e-41
Fhl2	ENSMUSG00000008136	1.62698	3.5943e-07	5.41317e-06
Tlr13	ENSMUSG00000033777	1.62428	3.50139e-10	7.46256e-09
Bst1	ENSMUSG00000029082	1.62172	4.41329e-06	5.65458e-05
Tlr9	ENSMUSG00000045322	1.6142	0.000779996	0.00613671
Ifi209	ENSMUSG00000043263	1.60613	1.09164e-07	1.7626e-06
Wfdc17	ENSMUSG00000069792	1.59651	3.09235e-15	1.02319e-13
Cd300ld3	ENSMUSG00000069607	1.59599	1.634e-06	2.25837e-05
Aoah	ENSMUSG00000021322	1.58885	3.30943e-06	4.32268e-05
Hhex	ENSMUSG00000024986	1.58827	0.000312661	0.00267215
Bcl6b	ENSMUSG00000000317	1.5762	0.00039986	0.003338
Lcp2	ENSMUSG00000002699	1.5752	2.38152e-09	4.66995e-08
Rrad	ENSMUSG00000031880	1.57407	3.18606e-09	6.12325e-08
Serpina3n	ENSMUSG00000021091	1.56832	8.73775e-108	2.45483e-105
P2rx1	ENSMUSG00000020787	1.56322	2.7409e-05	0.00029721
Myl4	ENSMUSG00000061086	1.55684	5.38669e-06	6.78363e-05
Hk3	ENSMUSG00000025877	1.55589	1.1052e-08	2.00677e-07
Fcna	ENSMUSG00000026938	1.55487	0.000103309	0.000997081
Ednrb	ENSMUSG00000022122	1.55224	6.99151e-20	3.12234e-18
Evi2b	ENSMUSG00000093938	1.55022	3.38577e-06	4.41866e-05
Spi1	ENSMUSG00000002111	1.5471	1.16999e-18	4.91269e-17
Olfr1033	ENSMUSG00000045392	1.54552	5.08501e-07	7.46897e-06
Itgam	ENSMUSG00000030786	1.54489	2.76279e-47	3.16227e-45
Meox1	ENSMUSG00000001493	1.52957	0.000654726	0.00525549
Col8a1	ENSMUSG00000068196	1.52731	1.62069e-08	2.89178e-07
Cthrc1	ENSMUSG00000054196	1.52724	1.49337e-06	2.077e-05
Sirpb1a	ENSMUSG00000095788	1.5204	0.000760337	0.00601573
Crispld2	ENSMUSG00000031825	1.51765	1.03937e-17	4.10751e-16
Tubb3	ENSMUSG00000062380	1.51602	0.000309301	0.00264782
Dok3	ENSMUSG00000035711	1.51285	1.04175e-05	0.000124015
Rac2	ENSMUSG00000033220	1.51061	6.86294e-30	4.71316e-28
Tdh	ENSMUSG00000021953	1.50639	0.000306347	0.00262544
C1qb	ENSMUSG00000036905	1.5038	1.11104e-123	3.73212e-121
Itgb2	ENSMUSG00000000290	1.50286	2.9772e-24	1.6668e-22
Loxl1	ENSMUSG00000032334	1.50165	1.055e-26	6.6538e-25
Ret	ENSMUSG00000030110	1.50039	1.36374e-06	1.90357e-05
C5ar1	ENSMUSG00000049130	1.49268	7.79213e-12	1.95779e-10
Sfrp2	ENSMUSG00000027996	1.48535	0.0003001	0.00258049
Aplnr	ENSMUSG00000044338	1.48506	1.71325e-15	5.76756e-14
Lcp1	ENSMUSG00000021998	1.4799	8.82867e-63	1.31174e-60
Ly9	ENSMUSG00000004707	1.47979	2.28735e-05	0.000252458
Coch	ENSMUSG00000020953	1.47881	1.93254e-15	6.47759e-14
Cd38	ENSMUSG00000029084	1.47118	8.00101e-09	1.47356e-07
Nxpe5	ENSMUSG00000047592	1.47008	0.000321877	0.00274484
Ebi3	ENSMUSG00000003206	1.46989	1.22416e-05	0.000143301
Cd180	ENSMUSG00000021624	1.46809	2.23528e-05	0.000247773
Ceacam1	ENSMUSG00000074272	1.46548	2.11774e-05	0.000236783
Ms4a7	ENSMUSG00000024672	1.46463	1.62294e-12	4.32374e-11
Fbln2	ENSMUSG00000064080	1.46336	3.79664e-78	6.74319e-76
Plek	ENSMUSG00000020120	1.46323	2.58551e-09	5.038e-08
Btk	ENSMUSG00000031264	1.46277	0.000153256	0.00140792
Myh8	ENSMUSG00000055775	1.45887	3.14511e-09	6.05963e-08
C1qc	ENSMUSG00000036896	1.45823	1.22215e-96	3.0459e-94
Tnnt1	ENSMUSG00000064179	1.45335	7.89527e-08	1.30759e-06
Nckap1l	ENSMUSG00000022488	1.44906	1.17682e-22	5.98166e-21
Pirb	ENSMUSG00000058818	1.44901	4.70271e-21	2.19536e-19
Il10ra	ENSMUSG00000032089	1.44612	1.23768e-11	3.05994e-10
Cyth4	ENSMUSG00000018008	1.443	4.89251e-23	2.51997e-21
Icam2	ENSMUSG00000001029	1.4429	6.5271e-06	8.10094e-05
Tmem8	ENSMUSG00000024180	1.44228	9.82248e-11	2.24191e-09
Laptm5	ENSMUSG00000028581	1.43841	6.98616e-87	1.43934e-84
Tnfrsf23	ENSMUSG00000037613	1.43571	2.84224e-05	0.000307121
Slc11a1	ENSMUSG00000026177	1.43461	4.7524e-15	1.54598e-13
Cldn5	ENSMUSG00000041378	1.43348	7.69996e-16	2.6558e-14
Emilin2	ENSMUSG00000024053	1.43255	1.17736e-18	4.93022e-17
Loxl2	ENSMUSG00000034205	1.43123	7.99336e-22	3.88407e-20
Lst1	ENSMUSG00000073412	1.43084	1.80571e-08	3.19608e-07
Vav1	ENSMUSG00000034116	1.43079	1.12826e-08	2.04623e-07
Psors1c2	ENSMUSG00000024409	1.43076	0.00123191	0.00917375
Tyrobp	ENSMUSG00000030579	1.4301	7.3305e-34	5.77913e-32
Ctss	ENSMUSG00000038642	1.42883	4.09016e-65	6.4491e-63
Lrrc25	ENSMUSG00000049988	1.41979	5.90924e-07	8.60599e-06
Adam12	ENSMUSG00000054555	1.41736	3.39868e-09	6.51567e-08
Ly86	ENSMUSG00000021423	1.41332	1.68383e-16	6.12199e-15
Cd300c2	ENSMUSG00000044811	1.41127	4.24965e-08	7.29618e-07
Spn	ENSMUSG00000051457	1.411	9.77825e-05	0.00095147
Tspan32	ENSMUSG00000000244	1.40886	0.001237	0.00919836
Bcl3	ENSMUSG00000053175	1.40756	2.15979e-08	3.80104e-07
Coro1a	ENSMUSG00000030707	1.40569	3.96266e-33	3.07693e-31
Cd48	ENSMUSG00000015355	1.405	8.25461e-07	1.18762e-05
C1qa	ENSMUSG00000036887	1.40392	2.12643e-79	3.8656e-77
P2ry6	ENSMUSG00000048779	1.4038	1.06243e-09	2.14597e-08
Ccr5	ENSMUSG00000079227	1.40229	1.88146e-12	4.98668e-11
Clec4a2	ENSMUSG00000030148	1.40141	1.63054e-14	5.12095e-13
Clec4a1	ENSMUSG00000049037	1.39925	5.02061e-16	1.77932e-14
Tnfrsf1b	ENSMUSG00000028599	1.39695	1.34928e-24	7.77949e-23
Tnn	ENSMUSG00000026725	1.39507	0.000481619	0.00397117
Msr1	ENSMUSG00000025044	1.39231	6.3794e-06	7.93037e-05
Fbln5	ENSMUSG00000021186	1.39138	1.85934e-23	9.80563e-22
Trim30a	ENSMUSG00000030921	1.38959	1.03559e-07	1.67384e-06
Fermt3	ENSMUSG00000024965	1.38909	1.7493e-13	5.03355e-12
Pira2	ENSMUSG00000089942	1.38792	0.000113422	0.00108453
Slfn2	ENSMUSG00000072620	1.38638	1.16414e-15	3.97092e-14
Adgre1	ENSMUSG00000004730	1.38539	1.00984e-61	1.47208e-59
Dll4	ENSMUSG00000027314	1.38317	5.75048e-05	0.000588453
B3gnt3	ENSMUSG00000031803	1.38244	1.6072e-09	3.20445e-08
Eng	ENSMUSG00000026814	1.38096	1.93106e-36	1.63949e-34
Tnfrsf13b	ENSMUSG00000010142	1.38076	5.46473e-05	0.00056107
Hcls1	ENSMUSG00000022831	1.37827	4.2027e-15	1.37877e-13
Clec12a	ENSMUSG00000053063	1.3775	1.2874e-08	2.32666e-07
Rab3il1	ENSMUSG00000024663	1.37716	1.89041e-13	5.41942e-12
Lyz2	ENSMUSG00000069516	1.37595	2.77666e-253	2.52382e-250
Alox5ap	ENSMUSG00000060063	1.37162	4.55705e-31	3.38536e-29
Tbxas1	ENSMUSG00000029925	1.36993	0.000123997	0.00117402
Flt4	ENSMUSG00000020357	1.3689	0.000236756	0.00208929
Ecscr	ENSMUSG00000073599	1.36694	3.07194e-06	4.04324e-05
Unc93b1	ENSMUSG00000036908	1.3609	6.38766e-47	7.20453e-45
Mrc1	ENSMUSG00000026712	1.36053	7.31926e-49	8.56797e-47
Scarf1	ENSMUSG00000038188	1.35728	0.000140727	0.0013068
Mest	ENSMUSG00000051855	1.35475	3.83904e-06	4.97658e-05
Cfp	ENSMUSG00000001128	1.3547	2.04644e-37	1.81733e-35
Fgd3	ENSMUSG00000037946	1.35265	0.00103846	0.00791626
Myo1f	ENSMUSG00000024300	1.35264	7.55026e-10	1.55971e-08
Nfam1	ENSMUSG00000058099	1.35233	8.99729e-10	1.83897e-08
Il1f6	ENSMUSG00000026984	1.352	2.58114e-05	0.000281466
Tie1	ENSMUSG00000033191	1.35062	3.42679e-23	1.79494e-21
Csf2ra	ENSMUSG00000059326	1.34978	4.66946e-07	6.89794e-06
Tifab	ENSMUSG00000049625	1.34706	5.72397e-06	7.18495e-05
Pld4	ENSMUSG00000052160	1.34569	6.84902e-24	3.75288e-22
Ncf4	ENSMUSG00000071715	1.34565	0.000525034	0.0042925
Mmp3	ENSMUSG00000043613	1.34459	1.89966e-09	3.75364e-08
Themis2	ENSMUSG00000037731	1.33983	1.06574e-10	2.41819e-09
Ssc5d	ENSMUSG00000035279	1.33961	7.52385e-06	9.1904e-05
Kcnab2	ENSMUSG00000028931	1.33941	5.60093e-08	9.42763e-07
Mndal	ENSMUSG00000090272	1.33855	2.54149e-06	3.38252e-05
Lat2	ENSMUSG00000040751	1.3381	0.00012676	0.00119724
Nrros	ENSMUSG00000052384	1.33702	1.58794e-15	5.38088e-14
Lyn	ENSMUSG00000042228	1.3361	8.5744e-17	3.19257e-15
Fbn1	ENSMUSG00000027204	1.33302	7.94503e-36	6.70856e-34
Itga5	ENSMUSG00000000555	1.33124	4.2432e-23	2.19284e-21
Sp110	ENSMUSG00000070034	1.33005	7.72761e-05	0.00076888
Igsf6	ENSMUSG00000035004	1.3296	5.24319e-06	6.61369e-05
Olfml3	ENSMUSG00000027848	1.3279	4.14968e-15	1.36718e-13
Clec7a	ENSMUSG00000079293	1.32719	0.00108462	0.00821953
She	ENSMUSG00000046280	1.32536	4.54301e-06	5.80154e-05
Mpeg1	ENSMUSG00000046805	1.32258	1.68257e-60	2.38524e-58
Olfml2a	ENSMUSG00000046618	1.32244	0.000776228	0.00611641
Elk3	ENSMUSG00000008398	1.31961	4.25609e-14	1.28699e-12
Ccr2	ENSMUSG00000049103	1.31919	1.85385e-13	5.32448e-12
Csf2rb	ENSMUSG00000071713	1.31784	2.12111e-14	6.56822e-13
Lgmn	ENSMUSG00000021190	1.31711	3.90459e-83	7.63717e-81
Fcgr2b	ENSMUSG00000026656	1.31334	3.82563e-22	1.88862e-20
Cd93	ENSMUSG00000027435	1.31208	1.99442e-24	1.12885e-22
Mmp11	ENSMUSG00000000901	1.31184	6.03719e-08	1.01179e-06
Upp1	ENSMUSG00000020407	1.31183	0.000444931	0.00368242
Ptprc	ENSMUSG00000026395	1.30774	2.38548e-11	5.80478e-10
Selplg	ENSMUSG00000048163	1.304	6.94416e-14	2.06348e-12
Cybb	ENSMUSG00000015340	1.3007	2.18543e-16	7.85333e-15
Cdh5	ENSMUSG00000031871	1.29918	6.06926e-30	4.18671e-28
Fetub	ENSMUSG00000022871	1.29867	0.000803443	0.00628916
Cd53	ENSMUSG00000040747	1.29792	2.63464e-21	1.24879e-19
Cd300lb	ENSMUSG00000063193	1.29576	0.000373342	0.0031438
Tlr8	ENSMUSG00000040522	1.29523	1.26362e-08	2.28635e-07
Ms4a4a	ENSMUSG00000101389	1.29486	3.64486e-09	6.96172e-08
Adcy4	ENSMUSG00000022220	1.29408	2.89978e-06	3.82316e-05
Zbp1	ENSMUSG00000027514	1.29255	0.000717193	0.00569772
Cd37	ENSMUSG00000030798	1.29064	7.96387e-08	1.31613e-06
Evi2a	ENSMUSG00000078771	1.2898	3.46696e-10	7.4096e-09
Ankrd1	ENSMUSG00000024803	1.28842	1.92523e-11	4.71452e-10
Clec4a3	ENSMUSG00000043832	1.28786	9.03046e-12	2.25791e-10
Col3a1	ENSMUSG00000026043	1.28766	0	0
Svep1	ENSMUSG00000028369	1.28761	6.07451e-14	1.82259e-12
Igf2bp2	ENSMUSG00000033581	1.28677	0.000967808	0.00742531
Myog	ENSMUSG00000026459	1.28616	7.03581e-10	1.46125e-08
Gsdmd	ENSMUSG00000022575	1.28487	6.84233e-06	8.42452e-05
Cyba	ENSMUSG00000006519	1.28113	2.68894e-21	1.27063e-19
B4galt6	ENSMUSG00000056124	1.28094	2.52795e-08	4.40879e-07
Folr2	ENSMUSG00000032725	1.28073	9.60865e-13	2.62319e-11
Loxl3	ENSMUSG00000000693	1.27908	0.000432693	0.0035869
Ms4a6c	ENSMUSG00000079419	1.27879	2.01871e-20	9.28367e-19
Nav1	ENSMUSG00000009418	1.27802	7.42235e-11	1.7067e-09
Snx20	ENSMUSG00000031662	1.27709	0.000831483	0.00648892
Itgb3	ENSMUSG00000020689	1.27571	7.22078e-06	8.86928e-05
Tlr2	ENSMUSG00000027995	1.27569	2.24467e-05	0.00024828
Entpd1	ENSMUSG00000048120	1.27489	5.58957e-18	2.24338e-16
Dock2	ENSMUSG00000020143	1.27123	1.88621e-09	3.73664e-08
Gm6551		1.26895	0.000156269	0.00142711
Fcrls	ENSMUSG00000015852	1.26491	6.6994e-16	2.33151e-14
Ace	ENSMUSG00000020681	1.26289	1.4026e-30	1.00338e-28
Tifa	ENSMUSG00000046688	1.26165	9.96226e-05	0.000967547
Creb3l1	ENSMUSG00000027230	1.25893	6.47642e-07	9.37898e-06
C1qtnf5	ENSMUSG00000079592	1.25415	1.36057e-06	1.90087e-05
Col1a1	ENSMUSG00000001506	1.25348	8.38001e-303	8.63252e-300
Fmnl1	ENSMUSG00000055805	1.25342	4.50434e-08	7.71631e-07
Slamf9	ENSMUSG00000026548	1.25224	4.70092e-06	5.98341e-05
Dhx58	ENSMUSG00000017830	1.25085	0.000860463	0.00668807
Col5a2	ENSMUSG00000026042	1.24932	4.5356e-50	5.43288e-48
Csf1	ENSMUSG00000014599	1.24821	1.92615e-15	6.4702e-14
Mmp19	ENSMUSG00000025355	1.24561	7.34107e-15	2.3583e-13
Csf1r	ENSMUSG00000024621	1.24453	2.50717e-49	2.95731e-47
Srpx2	ENSMUSG00000031253	1.24392	6.8431e-05	0.000687961
Sla	ENSMUSG00000022372	1.24332	6.59128e-06	8.17403e-05
Otulinl	ENSMUSG00000056069	1.24139	1.5706e-07	2.48403e-06
Pdgfra	ENSMUSG00000029231	1.24081	2.25215e-19	9.77535e-18
Dab2	ENSMUSG00000022150	1.24052	9.64201e-31	6.99475e-29
Tmem173	ENSMUSG00000024349	1.23932	1.15669e-06	1.63674e-05
Fmod	ENSMUSG00000041559	1.23866	4.59062e-06	5.85749e-05
Gja4	ENSMUSG00000050234	1.2369	1.03865e-09	2.10067e-08
Pf4	ENSMUSG00000029373	1.23642	1.13358e-12	3.07841e-11
Cd52	ENSMUSG00000000682	1.23608	1.4171e-10	3.15518e-09
Gjb6	ENSMUSG00000040055	1.23515	6.00591e-07	8.73854e-06
Hmcn2	ENSMUSG00000055632	1.23497	2.19316e-12	5.79293e-11
Ptprj	ENSMUSG00000025314	1.23414	1.09194e-18	4.59748e-17
AB124611	ENSMUSG00000057191	1.23113	1.85532e-09	3.68016e-08
Tspan11	ENSMUSG00000030351	1.22637	1.93362e-05	0.000218248
Lbp	ENSMUSG00000016024	1.22626	6.24949e-11	1.45214e-09
Tnfrsf14	ENSMUSG00000042333	1.22319	0.000140214	0.00130282
Sema3g	ENSMUSG00000021904	1.22229	7.24327e-17	2.70346e-15
Fyb	ENSMUSG00000022148	1.2222	6.28124e-12	1.58851e-10
Pecam1	ENSMUSG00000020717	1.22203	8.69585e-44	9.07894e-42
Cd84	ENSMUSG00000038147	1.21976	4.74413e-08	8.0645e-07
Apbb1ip	ENSMUSG00000026786	1.21956	1.94164e-10	4.27382e-09
Cd163	ENSMUSG00000008845	1.21937	3.402e-17	1.30118e-15
Nes	ENSMUSG00000004891	1.21875	1.05452e-13	3.07444e-12
Ctsc	ENSMUSG00000030560	1.21865	5.43659e-66	8.75064e-64
Fgd2	ENSMUSG00000024013	1.21667	8.53954e-05	0.000842074
Cfb	ENSMUSG00000090231	1.21621	9.73563e-25	5.67679e-23
Sp100	ENSMUSG00000026222	1.21401	9.45187e-09	1.73251e-07
Aldh3b1	ENSMUSG00000024885	1.21372	3.45075e-06	4.49586e-05
Ms4a6b	ENSMUSG00000024677	1.21362	6.76669e-09	1.25823e-07
Inpp5d	ENSMUSG00000026288	1.21359	2.41515e-12	6.34674e-11
Vcan	ENSMUSG00000021614	1.21337	1.46531e-12	3.92408e-11
Gmfg	ENSMUSG00000060791	1.21044	2.72828e-06	3.61246e-05
Ticam2	ENSMUSG00000056130	1.20911	0.00122243	0.0091119
Tubb6	ENSMUSG00000001473	1.20829	2.92808e-24	1.65127e-22
Meox2	ENSMUSG00000036144	1.20797	1.33895e-05	0.000155326
Slc28a2	ENSMUSG00000027219	1.20655	7.47734e-05	0.000745419
Gimap4	ENSMUSG00000054435	1.2064	0.00079564	0.00624073
Cnfn	ENSMUSG00000063651	1.20543	4.5916e-22	2.25954e-20
Sema7a	ENSMUSG00000038264	1.2025	3.50978e-12	9.08428e-11
Tmem88	ENSMUSG00000045377	1.20234	1.8442e-05	0.000209072
Sirpa	ENSMUSG00000037902	1.20167	4.63358e-42	4.64923e-40
Notch4	ENSMUSG00000015468	1.2011	8.46992e-07	1.2152e-05
Pcsk5	ENSMUSG00000024713	1.19974	6.68107e-05	0.000672985
B4galt5	ENSMUSG00000017929	1.19963	6.09341e-08	1.0201e-06
Bgn	ENSMUSG00000031375	1.19936	1.79852e-142	7.31334e-140
Mgp	ENSMUSG00000030218	1.19694	3.06377e-15	1.01591e-13
Fcgr3	ENSMUSG00000059498	1.19661	2.95076e-24	1.65801e-22
Lrmp	ENSMUSG00000030263	1.19627	0.000115885	0.00110466
Pstpip1	ENSMUSG00000032322	1.19261	2.54833e-05	0.000278281
Prex1	ENSMUSG00000039621	1.19231	2.08335e-14	6.46425e-13
Chil1	ENSMUSG00000064246	1.19104	4.61249e-12	1.18e-10
Oasl2	ENSMUSG00000029561	1.19069	1.74777e-08	3.09708e-07
Adamts2	ENSMUSG00000036545	1.19067	1.60341e-22	8.07034e-21
Arhgap30	ENSMUSG00000048865	1.19023	9.5973e-09	1.75708e-07
Jam2	ENSMUSG00000053062	1.18829	6.54438e-13	1.81877e-11
Ikzf1	ENSMUSG00000018654	1.1874	4.46177e-05	0.000466779
Endou	ENSMUSG00000022468	1.18603	7.05807e-13	1.95101e-11
Emilin1	ENSMUSG00000029163	1.18327	6.24848e-09	1.16749e-07
Ifit2	ENSMUSG00000045932	1.18299	2.7487e-05	0.000297846
Cd86	ENSMUSG00000022901	1.18294	0.000770647	0.00607863
Scamp5	ENSMUSG00000040722	1.18086	2.05787e-06	2.78199e-05
Arhgap4	ENSMUSG00000031389	1.17848	0.000120333	0.00114143
Prkcb	ENSMUSG00000052889	1.17821	1.85487e-06	2.52969e-05
Tnfaip8l2	ENSMUSG00000013707	1.17784	5.36243e-05	0.000551666
Ccl9	ENSMUSG00000019122	1.17695	7.14787e-32	5.38775e-30
Arap3	ENSMUSG00000024451	1.17479	8.01237e-06	9.73326e-05
C1ra	ENSMUSG00000055172	1.16959	1.10072e-19	4.84569e-18
Sdc3	ENSMUSG00000025743	1.16858	3.66563e-37	3.23664e-35
Cd300a	ENSMUSG00000034652	1.16665	1.89113e-08	3.34345e-07
Slc8a1	ENSMUSG00000054640	1.16528	4.94824e-05	0.000512812
Was	ENSMUSG00000031165	1.16456	0.00014346	0.00132898
Pdia5	ENSMUSG00000022844	1.16418	0.000146595	0.00135396
Oas1a	ENSMUSG00000052776	1.16198	1.39734e-05	0.000161494
Mfap4	ENSMUSG00000042436	1.16173	1.49175e-17	5.83556e-16
Csf2rb2	ENSMUSG00000071714	1.16151	6.96364e-09	1.29019e-07
Ctsk	ENSMUSG00000028111	1.16144	5.35962e-27	3.39413e-25
Ctla2a	ENSMUSG00000044258	1.16065	6.3492e-10	1.32399e-08
Tmem176a	ENSMUSG00000023367	1.15887	6.14365e-11	1.42969e-09
Efemp2	ENSMUSG00000024909	1.15875	8.95374e-10	1.83736e-08
Plvap	ENSMUSG00000034845	1.15853	4.12451e-41	3.9585e-39
Gm13889	ENSMUSG00000087006	1.15575	7.72152e-07	1.11196e-05
Fscn1	ENSMUSG00000029581	1.15381	7.94078e-20	3.53605e-18
Stfa3	ENSMUSG00000054905	1.1521	1.11899e-128	4.02107e-126
Aqp1	ENSMUSG00000004655	1.15129	3.45846e-91	7.74494e-89
Serpinb3b	ENSMUSG00000073602	1.151	0.000797367	0.00624792
Tinagl1	ENSMUSG00000028776	1.15099	1.3997e-22	7.06805e-21
Cd209b	ENSMUSG00000065987	1.15086	8.76429e-06	0.000105554
Dok2	ENSMUSG00000022102	1.15073	4.85993e-06	6.16549e-05
Angpt2	ENSMUSG00000031465	1.14783	0.000832051	0.00649008
Gpsm3	ENSMUSG00000034786	1.14536	1.06866e-06	1.52333e-05
Pdpn	ENSMUSG00000028583	1.14404	7.2319e-06	8.87588e-05
Fkbp10	ENSMUSG00000001555	1.14296	1.16727e-11	2.89979e-10
Col1a2	ENSMUSG00000029661	1.14213	8.43285e-253	7.23913e-250
Akna	ENSMUSG00000039158	1.14138	0.000141134	0.00130979
Cotl1	ENSMUSG00000031827	1.14069	1.02898e-34	8.3683e-33
Il2rg	ENSMUSG00000031304	1.14063	4.51459e-07	6.68834e-06
Rarres2	ENSMUSG00000009281	1.13953	1.23071e-22	6.23505e-21
Heg1	ENSMUSG00000075254	1.13874	1.67496e-23	8.86354e-22
Col5a1	ENSMUSG00000026837	1.1387	2.56078e-34	2.03965e-32
Napsa	ENSMUSG00000002204	1.13753	0.000707891	0.00564122
Pik3cd	ENSMUSG00000039936	1.13616	5.31886e-08	8.96259e-07
Erg	ENSMUSG00000040732	1.13315	0.000237765	0.0020958
Emp3	ENSMUSG00000040212	1.13315	1.31078e-15	4.46126e-14
Dock10	ENSMUSG00000038608	1.13306	0.000300478	0.00258087
Fxyd5	ENSMUSG00000009687	1.13225	3.59583e-23	1.8708e-21
Cldn15	ENSMUSG00000001739	1.13188	6.46841e-05	0.000653267
Mfap5	ENSMUSG00000030116	1.13149	1.44993e-08	2.5931e-07
Rcn3	ENSMUSG00000019539	1.13109	4.49331e-15	1.46788e-13
Egfl7	ENSMUSG00000026921	1.13026	1.0176e-11	2.53611e-10
Rgl1	ENSMUSG00000026482	1.13011	5.15755e-11	1.21116e-09
Myo1g	ENSMUSG00000020437	1.13002	2.7499e-06	3.63486e-05
Ptpn18	ENSMUSG00000026126	1.12923	7.5572e-06	9.22385e-05
F13a1	ENSMUSG00000039109	1.12898	7.85125e-48	9.05354e-46
Ripk3	ENSMUSG00000022221	1.12791	2.99047e-05	0.000322461
Lyl1	ENSMUSG00000034041	1.12725	5.29513e-05	0.000545469
Syk	ENSMUSG00000021457	1.1268	1.26765e-14	4.01387e-13
Pla2g7	ENSMUSG00000023913	1.12603	3.69495e-11	8.86558e-10
Tlr7	ENSMUSG00000044583	1.12539	3.5057e-06	4.56361e-05
Arhgap45	ENSMUSG00000035697	1.12325	5.18928e-08	8.76337e-07
Sod3	ENSMUSG00000072941	1.12242	1.55401e-20	7.1894e-19
Apobec3	ENSMUSG00000009585	1.11858	1.06249e-05	0.000126289
Mlkl	ENSMUSG00000012519	1.11657	0.000353002	0.00298554
Ncf1	ENSMUSG00000015950	1.11419	4.15767e-13	1.16596e-11
Shank3	ENSMUSG00000022623	1.11014	2.32718e-06	3.1215e-05
Ncf2	ENSMUSG00000026480	1.10693	7.62882e-08	1.2689e-06
Flt1	ENSMUSG00000029648	1.10386	4.12028e-12	1.05934e-10
Nos3	ENSMUSG00000028978	1.10195	1.99113e-06	2.6965e-05
Glipr2	ENSMUSG00000028480	1.10103	0.000138525	0.00129101
Rab31	ENSMUSG00000056515	1.0955	3.42363e-19	1.4695e-17
Vsir	ENSMUSG00000020101	1.09486	1.54464e-26	9.62412e-25
Vwf	ENSMUSG00000001930	1.09388	6.27287e-18	2.50461e-16
Irf8	ENSMUSG00000041515	1.09378	8.64223e-08	1.41913e-06
Sned1	ENSMUSG00000047793	1.09279	3.75449e-05	0.000398177
Ackr1	ENSMUSG00000037872	1.09244	0.000308316	0.00264085
Vcam1	ENSMUSG00000027962	1.09048	7.1629e-05	0.000715919
Hacd4	ENSMUSG00000028497	1.08956	2.9154e-07	4.44706e-06
Fam43a	ENSMUSG00000046546	1.08942	4.69289e-14	1.4163e-12
Xirp1	ENSMUSG00000079243	1.0882	2.65517e-55	3.53687e-53
Gpx2	ENSMUSG00000042808	1.08725	0.000102948	0.000995467
Lipa	ENSMUSG00000024781	1.08699	1.75217e-16	6.35551e-15
Mmrn2	ENSMUSG00000041445	1.08653	3.93712e-11	9.40283e-10
Il4ra	ENSMUSG00000030748	1.08449	5.10691e-20	2.30064e-18
Clec10a	ENSMUSG00000000318	1.0838	3.19051e-16	1.1412e-14
Cxcl12	ENSMUSG00000061353	1.08253	6.82045e-51	8.36425e-49
Ifi204	ENSMUSG00000073489	1.0821	5.294e-10	1.11145e-08
Tmem119	ENSMUSG00000054675	1.07954	1.74038e-07	2.73574e-06
Olfml2b	ENSMUSG00000038463	1.07925	2.93932e-11	7.09661e-10
Rassf2	ENSMUSG00000027339	1.0788	8.97586e-10	1.83946e-08
Galns	ENSMUSG00000015027	1.07856	0.000143284	0.00132815
2024-03-01	ENSMUSG00000036469	1.07683	0.000271533	0.00235583
Adam23	ENSMUSG00000025964	1.07682	1.18794e-05	0.000139483
Fli1	ENSMUSG00000016087	1.07519	0.000130958	0.00123163
Ptafr	ENSMUSG00000056529	1.07478	2.45502e-06	3.27591e-05
St8sia4	ENSMUSG00000040710	1.07451	0.000306008	0.00262399
Mustn1	ENSMUSG00000042485	1.07431	3.21416e-45	3.47309e-43
Podn	ENSMUSG00000028600	1.07389	2.52511e-10	5.48005e-09
Itga9	ENSMUSG00000039115	1.07058	4.89569e-07	7.21146e-06
Fstl1	ENSMUSG00000022816	1.06921	3.01456e-56	4.12221e-54
Adam19	ENSMUSG00000011256	1.06887	4.47842e-05	0.000467887
Gbp9	ENSMUSG00000029298	1.06875	0.000119666	0.00113649
Crabp1	ENSMUSG00000032291	1.06821	0.000288752	0.00249402
Tmem106a	ENSMUSG00000034947	1.06783	1.26774e-10	2.839e-09
Rasip1	ENSMUSG00000044562	1.06707	1.1149e-07	1.79827e-06
Icam1	ENSMUSG00000037405	1.067	3.65465e-10	7.76777e-09
Slc7a7	ENSMUSG00000000958	1.06699	5.92669e-05	0.000603687
Porcn	ENSMUSG00000031169	1.0669	4.23933e-07	6.32299e-06
Adgra2	ENSMUSG00000031486	1.0655	3.46133e-08	5.97592e-07
Dcn	ENSMUSG00000019929	1.06519	4.82989e-101	1.26494e-98
Crlf2	ENSMUSG00000033467	1.06494	1.29713e-05	0.000150928
Samd9l	ENSMUSG00000047735	1.06425	0.000205115	0.00183416
Cmtm3	ENSMUSG00000031875	1.06018	1.09336e-12	2.97965e-11
Apobec1	ENSMUSG00000040613	1.05919	1.67867e-06	2.30978e-05
Neurl3	ENSMUSG00000047180	1.05764	0.000210334	0.00187541
Mmp2	ENSMUSG00000031740	1.05718	2.01402e-34	1.61247e-32
Pdgfrb	ENSMUSG00000024620	1.0561	1.76522e-17	6.83613e-16
Map1a	ENSMUSG00000027254	1.0517	1.20002e-07	1.92551e-06
Thbs2	ENSMUSG00000023885	1.05058	2.8973e-26	1.79796e-24
Sox17	ENSMUSG00000025902	1.05053	0.000796156	0.0062416
S1pr1	ENSMUSG00000045092	1.05028	2.22977e-11	5.43446e-10
Ehd4	ENSMUSG00000027293	1.04841	1.5326e-34	1.23342e-32
Col6a3	ENSMUSG00000048126	1.04716	5.76984e-53	7.36822e-51
Tbx2	ENSMUSG00000000093	1.04667	0.000972963	0.00746116
Lhfpl2	ENSMUSG00000045312	1.04637	1.26594e-05	0.000147633
Fes	ENSMUSG00000053158	1.04629	1.42768e-05	0.000164754
Epsti1	ENSMUSG00000022014	1.04585	0.000128777	0.00121407
Ppp1r18	ENSMUSG00000034595	1.04455	2.75711e-14	8.46974e-13
Limd2	ENSMUSG00000040699	1.0437	4.15863e-11	9.88602e-10
Ptprb	ENSMUSG00000020154	1.04263	3.17298e-14	9.70868e-13
Fndc1	ENSMUSG00000071984	1.04246	1.46664e-06	2.04167e-05
Ubash3b	ENSMUSG00000032020	1.04209	0.000550236	0.00447487
Rnf213	ENSMUSG00000070327	1.03906	1.39701e-09	2.7962e-08
Pde3a	ENSMUSG00000041741	1.03861	0.000510011	0.00417852
Heyl	ENSMUSG00000032744	1.03524	0.000123457	0.00116963
Pltp	ENSMUSG00000017754	1.03374	1.43395e-71	2.38251e-69
Rassf4	ENSMUSG00000042129	1.03203	5.31069e-16	1.87353e-14
Nid2	ENSMUSG00000021806	1.02936	4.6813e-08	7.96646e-07
Isg15	ENSMUSG00000035692	1.02905	0.000274149	0.00237586
Col4a2	ENSMUSG00000031503	1.0286	4.11549e-56	5.5783e-54
Prelp	ENSMUSG00000041577	1.02794	1.81452e-18	7.4968e-17
Fgd5	ENSMUSG00000034037	1.02718	5.74806e-05	0.000588596
S1pr3	ENSMUSG00000067586	1.02665	1.94851e-05	0.000219769
Hic1	ENSMUSG00000043099	1.02405	0.000111482	0.00106862
Samhd1	ENSMUSG00000027639	1.02327	1.84296e-25	1.10807e-23
Lyz1	ENSMUSG00000069515	1.02307	3.67782e-14	1.11869e-12
Slc37a2	ENSMUSG00000032122	1.02248	6.23012e-07	9.03075e-06
Ccl6	ENSMUSG00000018927	1.02219	2.27307e-41	2.20902e-39
Musk	ENSMUSG00000057280	1.02196	0.000132284	0.00124183
Stard8	ENSMUSG00000031216	1.02017	1.41094e-13	4.08274e-12
C1qtnf6	ENSMUSG00000022440	1.01988	1.50719e-06	2.09435e-05
Wdfy4	ENSMUSG00000051506	1.01859	0.00114441	0.00861349
Adgrd1	ENSMUSG00000044017	1.01779	2.68711e-06	3.561e-05
Thbd	ENSMUSG00000074743	1.01238	2.4355e-14	7.51163e-13
Hp	ENSMUSG00000031722	1.00972	1.3657e-184	7.81585e-182
Gm21188	ENSMUSG00000095609	1.00895	0.000152539	0.00140383
Ifi211	ENSMUSG00000026536	1.00888	5.82575e-06	7.30678e-05
Hba-a2	ENSMUSG00000069917	1.00687	5.54875e-41	5.29255e-39
Lpcat1	ENSMUSG00000021608	1.00639	2.26026e-05	0.000249825
Mrc2	ENSMUSG00000020695	1.00587	7.45005e-11	1.71052e-09
Gcnt1	ENSMUSG00000038843	1.00397	0.00113077	0.00852742
Sema6b	ENSMUSG00000001227	1.00315	0.000337614	0.00286638
Cyp26b1	ENSMUSG00000063415	1.00095	1.11483e-10	2.51479e-09
Ifi207	ENSMUSG00000073490	1.00065	2.09197e-07	3.25859e-06
Ifitm1	ENSMUSG00000025491	1.00044	0.000621976	0.00501344
Lrg1	ENSMUSG00000037095	0.998241	9.95291e-25	5.78167e-23
Serping1	ENSMUSG00000023224	0.997578	8.094e-37	6.98706e-35
Scd2	ENSMUSG00000025203	0.997365	1.43167e-45	1.58015e-43
Srpx	ENSMUSG00000090084	0.996393	0.000136778	0.00127935
A4galt	ENSMUSG00000047878	0.995014	0.000189587	0.00170717
Slfn5	ENSMUSG00000054404	0.994052	2.01972e-13	5.7794e-12
Podxl	ENSMUSG00000025608	0.991472	3.83964e-14	1.16562e-12
Tmsb10	ENSMUSG00000079523	0.991462	7.91869e-25	4.65246e-23
Plekho2	ENSMUSG00000050721	0.989199	1.06508e-09	2.14852e-08
Pi15	ENSMUSG00000067780	0.988771	5.14894e-05	0.000532183
Esam	ENSMUSG00000001946	0.988527	8.62287e-14	2.53309e-12
Myo7a	ENSMUSG00000030761	0.985157	0.000792631	0.00622345
Rnasel	ENSMUSG00000066800	0.9846	8.69779e-06	0.000104835
Pi16	ENSMUSG00000024011	0.980578	6.65805e-13	1.84704e-11
Mcub	ENSMUSG00000027994	0.978422	0.00046262	0.00382472
Ldb2	ENSMUSG00000039706	0.977233	0.000412391	0.00343518
Pear1	ENSMUSG00000028073	0.97701	5.24766e-05	0.000540939
Serpinf1	ENSMUSG00000000753	0.975675	1.19761e-23	6.42553e-22
Plau	ENSMUSG00000021822	0.973441	4.97333e-08	8.40787e-07
Clec14a	ENSMUSG00000045930	0.973028	6.87592e-05	0.000689019
Col18a1	ENSMUSG00000001435	0.972119	8.56252e-44	9.00055e-42
Colec12	ENSMUSG00000036103	0.971617	4.50834e-06	5.76202e-05
Galnt16	ENSMUSG00000021130	0.971287	1.31812e-06	1.84489e-05
Serpine1	ENSMUSG00000037411	0.968595	1.13479e-06	1.61166e-05
Grn	ENSMUSG00000034708	0.968479	8.60693e-90	1.89992e-87
Cilp	ENSMUSG00000042254	0.967421	2.00943e-28	1.32691e-26
Mafb	ENSMUSG00000074622	0.966751	4.04377e-17	1.53902e-15
Peg3	ENSMUSG00000002265	0.964669	3.60703e-06	4.69157e-05
Gng2	ENSMUSG00000043004	0.964479	3.18642e-07	4.83186e-06
Ugcg	ENSMUSG00000028381	0.964136	8.92995e-08	1.46171e-06
Itga1	ENSMUSG00000042284	0.963646	0.000381473	0.00319833
Plekho1	ENSMUSG00000015745	0.963263	2.14483e-11	5.23568e-10
Ralb	ENSMUSG00000004451	0.963143	6.16748e-10	1.28784e-08
Rbp1	ENSMUSG00000046402	0.962942	4.99287e-07	7.3406e-06
Bex1	ENSMUSG00000050071	0.961895	0.000195617	0.00175634
Sparc	ENSMUSG00000018593	0.959872	4.29722e-284	4.15004e-281
Pappa2	ENSMUSG00000073530	0.957624	7.46375e-05	0.000744544
Kif26a	ENSMUSG00000021294	0.956755	0.00105427	0.00801309
Il16	ENSMUSG00000001741	0.956548	0.000230957	0.00204161
Scarf2	ENSMUSG00000012017	0.956384	3.94199e-05	0.000416633
Wipf1	ENSMUSG00000075284	0.956077	2.08558e-08	3.67881e-07
Fblim1	ENSMUSG00000006219	0.955161	0.000219765	0.00194937
Gusb	ENSMUSG00000025534	0.954342	9.97143e-14	2.91264e-12
Vasn	ENSMUSG00000039646	0.952687	1.0295e-05	0.000122745
Zeb2	ENSMUSG00000026872	0.95122	2.24316e-12	5.90482e-11
Dnm1	ENSMUSG00000026825	0.950953	0.000497508	0.00408692
Gpx7	ENSMUSG00000028597	0.948499	0.000766296	0.00605668
Ncam1	ENSMUSG00000039542	0.948413	6.21971e-06	7.76309e-05
Col5a3	ENSMUSG00000004098	0.948058	6.45971e-16	2.25317e-14
Rtp4	ENSMUSG00000033355	0.945233	0.000869879	0.00675106
Tnfsf12	ENSMUSG00000097328	0.94474	4.82151e-05	0.000500349
Gimap6	ENSMUSG00000047867	0.944279	0.00046062	0.00381023
Pla2g15	ENSMUSG00000031903	0.943863	1.22967e-10	2.76176e-09
Tcirg1	ENSMUSG00000001750	0.942739	2.41534e-06	3.22853e-05
Dapp1	ENSMUSG00000028159	0.942222	0.000799966	0.00626512
Col4a1	ENSMUSG00000031502	0.9401	3.15268e-88	6.67331e-86
Dchs1	ENSMUSG00000036862	0.939547	0.000711794	0.00566648
Dpysl2	ENSMUSG00000022048	0.936995	2.03316e-06	2.751e-05
Ifitm3	ENSMUSG00000025492	0.935312	6.38159e-54	8.42807e-52
Klk9	ENSMUSG00000047884	0.934669	4.19414e-06	5.39615e-05
Lrrc15	ENSMUSG00000052316	0.934402	0.000151851	0.00139833
Golm1	ENSMUSG00000021556	0.932197	0.000258937	0.0022605
Col15a1	ENSMUSG00000028339	0.931048	9.29373e-18	3.68222e-16
Naaa	ENSMUSG00000029413	0.93025	1.4631e-15	4.96874e-14
Thbs1	ENSMUSG00000040152	0.930192	6.69431e-22	3.28383e-20
Tm6sf1	ENSMUSG00000038623	0.929775	2.72679e-07	4.17586e-06
Ets1	ENSMUSG00000032035	0.928743	4.08536e-07	6.11103e-06
Lgals3bp	ENSMUSG00000033880	0.927863	1.65158e-25	9.9688e-24
Col6a2	ENSMUSG00000020241	0.927626	1.5411e-51	1.90505e-49
Fmnl3	ENSMUSG00000023008	0.926908	2.41227e-05	0.000265109
Adam15	ENSMUSG00000028041	0.926486	2.12431e-27	1.36203e-25
Cbfa2t3	ENSMUSG00000006362	0.925811	0.000184818	0.00166811
Tgfb1	ENSMUSG00000002603	0.924211	9.09985e-16	3.12469e-14
Casp14	ENSMUSG00000005355	0.920063	4.91509e-30	3.42108e-28
Scpep1	ENSMUSG00000000278	0.920017	5.39556e-20	2.42361e-18
Ifit3	ENSMUSG00000074896	0.918923	6.37124e-06	7.93299e-05
Igf2	ENSMUSG00000048583	0.918833	1.90017e-06	2.58235e-05
Basp1	ENSMUSG00000045763	0.918696	6.84847e-05	0.000688053
Msn	ENSMUSG00000031207	0.917797	6.61079e-50	7.85769e-48
Nrp1	ENSMUSG00000025810	0.917686	4.95889e-16	1.76149e-14
Dok1	ENSMUSG00000068335	0.914302	0.00034162	0.0028988
Hbb-bt	ENSMUSG00000073940	0.913804	5.16261e-16	1.82546e-14
Pcolce	ENSMUSG00000029718	0.913512	4.58296e-19	1.95085e-17
S1pr2	ENSMUSG00000043895	0.91265	1.26785e-05	0.000147744
Arrb2	ENSMUSG00000060216	0.911981	1.05075e-08	1.91239e-07
Tek	ENSMUSG00000006386	0.907676	1.5094e-06	2.09554e-05
Sema6d	ENSMUSG00000027200	0.907332	0.000831241	0.00649032
Acvrl1	ENSMUSG00000000530	0.907262	7.676e-08	1.27537e-06
Oaf	ENSMUSG00000032014	0.90692	3.91196e-05	0.000413742
C1s1	ENSMUSG00000038521	0.906793	3.04159e-19	1.30915e-17
Emcn	ENSMUSG00000054690	0.90678	2.16901e-05	0.000241466
Abca9	ENSMUSG00000041797	0.905194	8.47874e-06	0.000102434
Ctsz	ENSMUSG00000016256	0.904007	1.50198e-25	9.1014e-24
S100a4	ENSMUSG00000001020	0.903614	9.50103e-24	5.13321e-22
Arhgap9	ENSMUSG00000040345	0.900164	3.29771e-05	0.000352638
Tmsb4x	ENSMUSG00000049775	0.898476	1.02586e-234	7.54836e-232
Ddx58	ENSMUSG00000040296	0.89819	3.54406e-05	0.000377154
Slc5a8	ENSMUSG00000020062	0.897797	1.43212e-05	0.000165143
Adamts5	ENSMUSG00000022894	0.897441	6.16987e-08	1.03178e-06
Rsad2	ENSMUSG00000020641	0.896868	0.00116734	0.00875615
Lsp1	ENSMUSG00000018819	0.896557	1.30052e-08	2.34487e-07
Col6a1	ENSMUSG00000001119	0.896494	1.07812e-53	1.39992e-51
Ggt5	ENSMUSG00000006344	0.895032	0.000372014	0.00313433
Hba-a1	ENSMUSG00000069919	0.894845	1.30699e-43	1.35541e-41
Man1c1	ENSMUSG00000037306	0.892892	7.67304e-09	1.41484e-07
Slc43a3	ENSMUSG00000027074	0.892145	9.79025e-08	1.5874e-06
Hmcn1	ENSMUSG00000066842	0.890512	9.90796e-05	0.000963485
Helz2	ENSMUSG00000027580	0.887077	0.000528391	0.00431538
Itga4	ENSMUSG00000027009	0.886759	0.000676597	0.00541137
Iqgap2	ENSMUSG00000021676	0.886582	0.000161886	0.00147492
Adap1	ENSMUSG00000056413	0.885728	0.00110559	0.00835794
Ifi203	ENSMUSG00000039997	0.884907	0.000156241	0.0014277
Kdr	ENSMUSG00000062960	0.88467	1.72579e-06	2.36409e-05
Bst2	ENSMUSG00000046718	0.884409	3.04622e-07	4.63746e-06
Gm4070	ENSMUSG00000078606	0.882783	1.14273e-05	0.000134686
Klf2	ENSMUSG00000055148	0.881065	2.39884e-08	4.2026e-07
Col14a1	ENSMUSG00000022371	0.881052	5.65775e-11	1.3206e-09
Sulf1	ENSMUSG00000016918	0.879918	0.000153499	0.00140931
Fam111a	ENSMUSG00000024691	0.877234	4.39019e-06	5.62965e-05
Hbb-bs	ENSMUSG00000052305	0.877038	7.31719e-38	6.57356e-36
Ramp2	ENSMUSG00000001240	0.876445	9.74656e-09	1.78019e-07
Pik3cg	ENSMUSG00000020573	0.873687	0.00105471	0.00801251
Selenop	ENSMUSG00000064373	0.872926	8.74692e-205	5.40629e-202
Plxnd1	ENSMUSG00000030123	0.872805	3.70255e-12	9.55123e-11
Trpv2	ENSMUSG00000018507	0.872684	0.00076662	0.00605304
Gpr153	ENSMUSG00000042804	0.872565	9.10555e-05	0.000893326
Lmo2	ENSMUSG00000032698	0.866919	6.25716e-05	0.000634004
Lum	ENSMUSG00000036446	0.866339	6.07702e-16	2.139e-14
Pla2g4e	ENSMUSG00000050211	0.865934	4.25685e-07	6.34299e-06
Mrgprf	ENSMUSG00000031070	0.86468	0.000131781	0.00123786
Acta2	ENSMUSG00000035783	0.862518	1.86689e-50	2.27144e-48
Clcn5	ENSMUSG00000004317	0.86228	0.00130623	0.0096435
Lama2	ENSMUSG00000019899	0.859502	3.2668e-07	4.9392e-06
Nfatc4	ENSMUSG00000023411	0.859211	0.000673434	0.00538887
Gda	ENSMUSG00000058624	0.857761	1.85101e-12	4.92286e-11
Ly6a	ENSMUSG00000075602	0.857203	5.36346e-37	4.65597e-35
Pde2a	ENSMUSG00000110195	0.8561	1.64506e-09	3.27149e-08
Bicc1	ENSMUSG00000014329	0.855207	0.000135898	0.00127266
Arhgef2	ENSMUSG00000028059	0.854285	4.01215e-10	8.49257e-09
Gpihbp1	ENSMUSG00000022579	0.852398	0.000154868	0.00141682
Lhfp	ENSMUSG00000048332	0.852268	5.63783e-07	8.22623e-06
Masp1	ENSMUSG00000022887	0.851694	0.000669455	0.00536258
Adamts12	ENSMUSG00000047497	0.851188	2.11929e-05	0.000236784
Atp2a3	ENSMUSG00000020788	0.850896	2.45986e-07	3.7934e-06
Parp14	ENSMUSG00000034422	0.850895	3.27774e-07	4.95089e-06
Cp	ENSMUSG00000003617	0.850231	7.906e-08	1.30796e-06
Sipa1	ENSMUSG00000056917	0.848977	1.38297e-05	0.000159953
Sh3kbp1	ENSMUSG00000040990	0.848716	1.80626e-07	2.83642e-06
Nr2f2	ENSMUSG00000030551	0.847639	0.000253052	0.00221539
Pip4k2a	ENSMUSG00000026737	0.846827	4.24971e-09	8.07707e-08
Igsf10	ENSMUSG00000036334	0.844745	0.000347186	0.00293957
Cbr2	ENSMUSG00000025150	0.844144	1.24872e-19	5.46606e-18
Gns	ENSMUSG00000034707	0.843815	5.31533e-33	4.10663e-31
Sox18	ENSMUSG00000046470	0.84292	1.13543e-07	1.82756e-06
Kctd12	ENSMUSG00000098557	0.840298	7.37761e-19	3.13184e-17
Chil3	ENSMUSG00000040809	0.84025	2.74704e-06	3.63419e-05
Tlr4	ENSMUSG00000039005	0.83996	1.93164e-05	0.000218185
Ckap4	ENSMUSG00000046841	0.833274	1.80862e-14	5.63444e-13
Arhgap31	ENSMUSG00000022799	0.832024	1.14534e-07	1.8416e-06
Slc25a45	ENSMUSG00000024818	0.83076	0.00119132	0.00891009
Itgbl1	ENSMUSG00000032925	0.829544	0.00014001	0.0013017
Csta1	ENSMUSG00000034362	0.828125	6.41947e-09	1.19799e-07
Tmem176b	ENSMUSG00000029810	0.827692	1.1216e-19	4.92359e-18
Aqp9	ENSMUSG00000032204	0.824694	0.000810447	0.00633756
Trpv4	ENSMUSG00000014158	0.824014	0.000310712	0.00265843
St6galnac4	ENSMUSG00000079442	0.823153	1.98439e-05	0.00022349
Cyyr1	ENSMUSG00000041134	0.821779	0.000207571	0.00185291
Adcy7	ENSMUSG00000031659	0.821268	1.63627e-06	2.25948e-05
Dpep1	ENSMUSG00000019278	0.821204	7.15172e-08	1.19211e-06
Swap70	ENSMUSG00000031015	0.821079	2.28062e-06	3.06437e-05
Cald1	ENSMUSG00000029761	0.818855	3.15237e-13	8.88877e-12
Them5	ENSMUSG00000028148	0.818123	9.70764e-08	1.57897e-06
Slc9a9	ENSMUSG00000031129	0.817862	9.13992e-05	0.00089613
Peak1	ENSMUSG00000074305	0.817726	3.41968e-06	4.45915e-05
Il10rb	ENSMUSG00000022969	0.817169	1.22965e-07	1.96693e-06
Gbp7	ENSMUSG00000040253	0.814439	0.00124999	0.00927707
Medag	ENSMUSG00000029659	0.814307	7.5612e-06	9.22144e-05
Nccrp1	ENSMUSG00000047586	0.814111	2.3135e-09	4.5539e-08
Galnt6	ENSMUSG00000037280	0.813954	7.01833e-05	0.000702378
Stx2	ENSMUSG00000029428	0.81389	0.000421161	0.00350069
Ftl1	ENSMUSG00000050708	0.810816	3.48354e-236	2.69139e-233
Ube2l6	ENSMUSG00000027078	0.808094	1.12598e-05	0.000132916
Lpar1	ENSMUSG00000038668	0.807392	0.000417086	0.00346868
P3h1	ENSMUSG00000028641	0.807366	0.000360769	0.0030479
Rin3	ENSMUSG00000044456	0.807102	0.000807462	0.00631742
Serpinb12	ENSMUSG00000059956	0.806776	0.000367455	0.0030976
Lrp1	ENSMUSG00000040249	0.806499	2.17273e-41	2.12487e-39
Efhd2	ENSMUSG00000040659	0.804711	4.41239e-25	2.61227e-23
Mmp14	ENSMUSG00000000957	0.80374	8.78978e-35	7.18622e-33
Mxra7	ENSMUSG00000020814	0.800993	5.97194e-05	0.000607895
Ifitm2	ENSMUSG00000060591	0.799484	8.95096e-40	8.33195e-38
Prcp	ENSMUSG00000061119	0.799156	1.28575e-12	3.46727e-11
Selenon	ENSMUSG00000050989	0.799012	1.26315e-07	2.01843e-06
Tmem229b	ENSMUSG00000046157	0.798428	9.57464e-05	0.000934011
St6gal1	ENSMUSG00000022885	0.798334	0.000184692	0.00166795
Fam114a1	ENSMUSG00000029185	0.797119	0.000670955	0.00537181
Cd302	ENSMUSG00000060703	0.79684	4.61944e-05	0.000480995
Slc9a3r2	ENSMUSG00000002504	0.79453	6.62771e-08	1.10715e-06
Ifi30	ENSMUSG00000031838	0.791705	1.08221e-19	4.77781e-18
Grk5	ENSMUSG00000003228	0.791452	0.00107324	0.00814124
Ddr2	ENSMUSG00000026674	0.789019	9.77048e-07	1.39532e-05
Fam129a	ENSMUSG00000026483	0.788289	2.08242e-10	4.56419e-09
Mcam	ENSMUSG00000032135	0.786509	1.21133e-14	3.84343e-13
Rhoc	ENSMUSG00000002233	0.780804	5.34255e-11	1.2508e-09
Gpc3	ENSMUSG00000055653	0.780584	0.000135426	0.00126902
Slc5a3	ENSMUSG00000089774	0.780537	0.000512792	0.00419908
Hspg2	ENSMUSG00000028763	0.780392	2.5361e-33	1.98923e-31
Clec2d	ENSMUSG00000030157	0.780318	0.000477918	0.00394487
Adgrl4	ENSMUSG00000039167	0.778462	1.64817e-05	0.000188788
Map1s	ENSMUSG00000019261	0.777825	0.00136234	0.00999566
Zbtb8b	ENSMUSG00000048485	0.777684	8.1251e-05	0.000803771
Mapt	ENSMUSG00000018411	0.776325	1.65855e-07	2.61243e-06
Cfh	ENSMUSG00000026365	0.776174	8.67564e-05	0.00085386
Tgm1	ENSMUSG00000022218	0.775484	0.000143556	0.00132828
Inhbb	ENSMUSG00000037035	0.774083	8.37686e-08	1.37848e-06
Stard3nl	ENSMUSG00000003062	0.773192	7.1298e-05	0.000713073
Plk1	ENSMUSG00000030867	0.773063	1.83142e-05	0.000207929
Soga1	ENSMUSG00000055485	0.770377	1.80938e-05	0.00020588
Gbp3	ENSMUSG00000028268	0.769716	0.00116671	0.00875569
Cpne2	ENSMUSG00000034361	0.769313	5.23206e-05	0.000539691
Man2b1	ENSMUSG00000005142	0.767693	2.06197e-16	7.42693e-15
D17H6S56E-5		0.766145	1.36376e-21	6.54435e-20
Nid1	ENSMUSG00000005397	0.76354	2.68273e-22	1.33291e-20
Trim47	ENSMUSG00000020773	0.760712	4.34532e-07	6.46858e-06
Hip1	ENSMUSG00000039959	0.759431	3.39254e-10	7.28077e-09
Kirrel	ENSMUSG00000041734	0.758847	4.37191e-07	6.5019e-06
Thy1	ENSMUSG00000032011	0.758834	8.57555e-16	2.95121e-14
Evl	ENSMUSG00000021262	0.758312	1.79574e-05	0.000204479
Trim14	ENSMUSG00000039853	0.755364	0.000660963	0.00530005
1110002E22Rik	ENSMUSG00000090066	0.755142	7.59849e-10	1.56758e-08
Igfbp7	ENSMUSG00000036256	0.753683	1.94908e-40	1.84768e-38
Ctsh	ENSMUSG00000032359	0.753574	2.77328e-18	1.13668e-16
Ifnar2	ENSMUSG00000022971	0.753072	1.10455e-06	1.57304e-05
St3gal1	ENSMUSG00000013846	0.752254	3.68998e-07	5.54645e-06
Lgals1	ENSMUSG00000068220	0.750569	3.21379e-35	2.68429e-33
Gpm6b	ENSMUSG00000031342	0.748142	0.000287434	0.00248402
Apod	ENSMUSG00000022548	0.748016	6.58854e-31	4.82494e-29
Cd248	ENSMUSG00000056481	0.747592	3.24516e-05	0.000347741
Myh10	ENSMUSG00000020900	0.747445	5.83476e-05	0.000596288
Tspan4	ENSMUSG00000025511	0.743678	2.52542e-08	4.40935e-07
Abcg1	ENSMUSG00000024030	0.74285	3.06124e-08	5.30889e-07
Casp8	ENSMUSG00000026029	0.742846	5.87004e-06	7.35635e-05
Iigp1	ENSMUSG00000054072	0.742013	0.001044	0.00795454
P2rx4	ENSMUSG00000029470	0.737364	3.63213e-07	5.46482e-06
Klk7	ENSMUSG00000030713	0.736786	1.74974e-18	7.26801e-17
Ntn1	ENSMUSG00000020902	0.736579	0.00046758	0.00386366
Rgs5	ENSMUSG00000026678	0.735805	2.65636e-25	1.58479e-23
Crip1	ENSMUSG00000006360	0.731075	1.23434e-12	3.34029e-11
Ckb	ENSMUSG00000001270	0.730625	7.0136e-09	1.29789e-07
Ctsb	ENSMUSG00000021939	0.730132	1.16984e-188	6.95243e-186
Fndc3b	ENSMUSG00000039286	0.728386	1.23292e-06	1.73824e-05
Armcx4	ENSMUSG00000049804	0.72821	0.000541774	0.00441069
Tnxb	ENSMUSG00000033327	0.728012	1.55432e-17	6.065e-16
Galnt17	ENSMUSG00000034040	0.727628	0.00135647	0.0099668
Mfge8	ENSMUSG00000030605	0.727515	8.86822e-29	5.90654e-27
Mfap2	ENSMUSG00000060572	0.726238	0.000258813	0.0022607
Fam171a2	ENSMUSG00000034685	0.725242	0.000883976	0.00685015
Nceh1	ENSMUSG00000027698	0.725146	0.000590332	0.00476833
Olfm1	ENSMUSG00000026833	0.725011	0.000137233	0.00128206
Myo5a	ENSMUSG00000034593	0.724509	2.75263e-10	5.94876e-09
Akr1b8	ENSMUSG00000029762	0.724472	0.000237741	0.00209679
Fn1	ENSMUSG00000026193	0.722488	8.41573e-15	2.69792e-13
Sacs	ENSMUSG00000048279	0.721319	0.000837658	0.00652723
Plod1	ENSMUSG00000019055	0.720021	2.03482e-13	5.81183e-12
Tagln2	ENSMUSG00000026547	0.719914	1.19274e-36	1.01824e-34
Pid1	ENSMUSG00000045658	0.719376	0.000298633	0.00257074
Gnpda1	ENSMUSG00000052102	0.718316	5.78408e-08	9.72531e-07
Scarb1	ENSMUSG00000037936	0.717839	2.54255e-17	9.77301e-16
Ivl	ENSMUSG00000049128	0.717332	1.63571e-05	0.0001875
Actb	ENSMUSG00000029580	0.716768	4.35445e-205	2.80354e-202
Mxra8	ENSMUSG00000029070	0.710824	4.41606e-09	8.38292e-08
Filip1l	ENSMUSG00000043336	0.710348	3.83759e-11	9.17932e-10
Acp2	ENSMUSG00000002103	0.709216	1.59382e-07	2.51303e-06
Itgb6	ENSMUSG00000026971	0.708721	0.000710606	0.00565994
Irf5	ENSMUSG00000029771	0.708456	4.3468e-05	0.000456296
Robo4	ENSMUSG00000032125	0.707571	0.00127748	0.00944934
Itpr1	ENSMUSG00000030102	0.707339	0.000715268	0.00568535
Gvin1	ENSMUSG00000045868	0.706785	0.00030013	0.00257931
Serpinh1	ENSMUSG00000070436	0.706764	8.19949e-42	8.1217e-40
Pkn1	ENSMUSG00000057672	0.70458	3.59092e-11	8.62938e-10
Lamc1	ENSMUSG00000026478	0.701405	4.09919e-21	1.91942e-19
Islr	ENSMUSG00000037206	0.700613	8.98449e-05	0.00088257
Il1f9	ENSMUSG00000044103	0.699059	0.00119817	0.00894836
Eva1b	ENSMUSG00000050212	0.695375	0.00121547	0.00907315
Asah1	ENSMUSG00000031591	0.692808	1.01084e-09	2.05249e-08
Dsc1	ENSMUSG00000044322	0.69257	1.18691e-09	2.38803e-08
Il1r1	ENSMUSG00000026072	0.69182	4.20684e-05	0.000442505
Ttc9	ENSMUSG00000042734	0.690958	0.000345972	0.0029309
Ripor1	ENSMUSG00000038604	0.690842	1.1071e-05	0.000130787
Pros1	ENSMUSG00000022912	0.690534	6.75862e-11	1.56573e-09
Adgre5	ENSMUSG00000002885	0.690318	7.2757e-08	1.21147e-06
Plk2	ENSMUSG00000021701	0.690209	0.000695152	0.00555402
Irf1	ENSMUSG00000018899	0.689027	3.47718e-05	0.000370547
Gnai2	ENSMUSG00000032562	0.687172	2.86167e-38	2.60109e-36
Sh3bgrl3	ENSMUSG00000028843	0.686172	1.70705e-18	7.10979e-17
Prss12	ENSMUSG00000027978	0.682337	0.00134524	0.00989839
Impdh1	ENSMUSG00000003500	0.681193	1.37495e-05	0.000159144
Ptpn6	ENSMUSG00000004266	0.680488	6.80157e-06	8.3877e-05
Ly6e	ENSMUSG00000022587	0.678574	1.52353e-46	1.70591e-44
Tm4sf1	ENSMUSG00000027800	0.678274	2.38682e-05	0.000263061
Rhoj	ENSMUSG00000046768	0.677838	7.9468e-05	0.000788657
Gpnmb	ENSMUSG00000029816	0.677768	3.97876e-07	5.96313e-06
Hexa	ENSMUSG00000025232	0.677103	7.50472e-22	3.65814e-20
Igf2r	ENSMUSG00000023830	0.676912	6.1e-12	1.5452e-10
Ninj1	ENSMUSG00000037966	0.676485	9.11827e-10	1.86123e-08
Sparcl1	ENSMUSG00000029309	0.675962	2.19888e-18	9.03647e-17
Neurl1b	ENSMUSG00000034413	0.675114	5.08311e-05	0.000526083
Stard4	ENSMUSG00000024378	0.674114	6.85378e-05	0.00068814
Pgm5	ENSMUSG00000041731	0.672875	8.00929e-06	9.73718e-05
Ehf	ENSMUSG00000012350	0.669847	0.000106895	0.00102977
Timp2	ENSMUSG00000017466	0.669785	5.45846e-35	4.51038e-33
Tuba1a	ENSMUSG00000072235	0.669318	3.04083e-21	1.43253e-19
Ube2c	ENSMUSG00000001403	0.668899	4.60769e-05	0.000480095
Gfra1	ENSMUSG00000025089	0.667865	0.000271628	0.00235533
Rab8b	ENSMUSG00000036943	0.667535	4.4691e-07	6.64005e-06
Mfsd12	ENSMUSG00000034854	0.666563	0.00112601	0.00850395
Irf7	ENSMUSG00000025498	0.666401	1.83442e-07	2.87479e-06
Myof	ENSMUSG00000048612	0.664372	1.20292e-10	2.7056e-09
Vim	ENSMUSG00000026728	0.664032	1.08297e-127	3.71869e-125
Hspb7	ENSMUSG00000006221	0.663819	8.07749e-113	2.44732e-110
Nfatc2	ENSMUSG00000027544	0.663551	7.23311e-06	8.87032e-05
Cdc20	ENSMUSG00000006398	0.662228	5.035e-06	6.37712e-05
Serpinb1a	ENSMUSG00000044734	0.661702	6.78152e-05	0.000682214
Cdk1	ENSMUSG00000019942	0.661397	3.11362e-05	0.000334806
Irx4	ENSMUSG00000021604	0.661094	1.8363e-06	2.50658e-05
Cdsn	ENSMUSG00000039518	0.658809	4.94103e-13	1.37814e-11
Fgl2	ENSMUSG00000039899	0.658433	1.60832e-09	3.20254e-08
Adgrf5	ENSMUSG00000056492	0.656481	4.55012e-08	7.76889e-07
Ablim1	ENSMUSG00000025085	0.656423	2.02114e-42	2.05465e-40
Fyn	ENSMUSG00000019843	0.656393	0.000146269	0.00135176
Tagln	ENSMUSG00000032085	0.655409	8.60065e-18	3.42519e-16
Sh3bp2	ENSMUSG00000054520	0.654851	0.000655302	0.00525739
Sln	ENSMUSG00000042045	0.654604	9.32343e-10	1.8981e-08
Myadm	ENSMUSG00000068566	0.652755	1.68947e-17	6.5592e-16
Fam49b	ENSMUSG00000022378	0.652715	4.79925e-06	6.09852e-05
Slc43a2	ENSMUSG00000038178	0.652221	5.80884e-11	1.35382e-09
Cadm3	ENSMUSG00000005338	0.651085	0.00124774	0.00926478
Flnc	ENSMUSG00000068699	0.651051	9.41758e-94	2.20486e-91
Sbno2	ENSMUSG00000035673	0.650963	8.04194e-08	1.32619e-06
Ssbp4	ENSMUSG00000070003	0.649863	1.28916e-06	1.80764e-05
Zc3h7a	ENSMUSG00000037965	0.649863	0.000723865	0.00573892
Klk8	ENSMUSG00000064023	0.647601	1.31871e-05	0.000153208
Arrdc4	ENSMUSG00000042659	0.647567	0.000210062	0.00187406
Parvb	ENSMUSG00000022438	0.647372	1.50384e-05	0.000173025
Rrbp1	ENSMUSG00000027422	0.646025	2.65906e-16	9.53314e-15
Macf1	ENSMUSG00000028649	0.641319	6.45533e-16	2.25674e-14
Crabp2	ENSMUSG00000004885	0.638639	0.000296246	0.00255304
Tpm4	ENSMUSG00000031799	0.638614	2.89871e-26	1.79164e-24
Numbl	ENSMUSG00000063160	0.638233	0.00062817	0.00506073
Jcad	ENSMUSG00000033960	0.636697	0.000189446	0.00170689
Pcdh1	ENSMUSG00000051375	0.6361	1.60167e-06	2.21566e-05
Rhog	ENSMUSG00000073982	0.633291	1.06062e-10	2.41011e-09
Rab11fip5	ENSMUSG00000051343	0.632697	4.39037e-17	1.66683e-15
Slco2a1	ENSMUSG00000032548	0.631848	1.96063e-07	3.06327e-06
Gm43305		0.631631	1.90154e-17	7.34565e-16
Gab2	ENSMUSG00000004508	0.631356	0.000712127	0.0056633
Cd74	ENSMUSG00000024610	0.630653	3.58289e-24	1.98433e-22
Rgs3	ENSMUSG00000059810	0.630437	0.000263049	0.00228994
Ogn	ENSMUSG00000021390	0.630195	2.1931e-05	0.000243622
Calm4	ENSMUSG00000033765	0.62936	7.13853e-61	1.02134e-58
Grb10	ENSMUSG00000020176	0.629209	3.82854e-06	4.96713e-05
Cygb	ENSMUSG00000020810	0.627339	1.24027e-06	1.74701e-05
Enah	ENSMUSG00000022995	0.627233	4.10573e-09	7.81303e-08
Lasp1	ENSMUSG00000038366	0.62722	1.21728e-17	4.7983e-16
C130074G19Rik	ENSMUSG00000039349	0.626005	2.41936e-06	3.23111e-05
Arhgap18	ENSMUSG00000039031	0.625602	0.00033713	0.00286385
Ass1	ENSMUSG00000076441	0.624436	9.36429e-08	1.52795e-06
Ctsl	ENSMUSG00000021477	0.62417	2.94058e-29	1.97556e-27
Ccnb2	ENSMUSG00000032218	0.623826	0.000552407	0.00449016
2024-09-09	ENSMUSG00000059248	0.623775	1.37859e-14	4.34734e-13
S100a6	ENSMUSG00000001025	0.623554	8.05399e-42	8.02905e-40
Mt2	ENSMUSG00000031762	0.622656	1.55867e-17	6.06663e-16
Far1	ENSMUSG00000030759	0.622593	7.95521e-13	2.18726e-11
Pxdc1	ENSMUSG00000021411	0.62244	0.000219347	0.0019479
Arap1	ENSMUSG00000032812	0.622357	3.40701e-10	7.30169e-09
Cxcl14	ENSMUSG00000021508	0.620754	2.59561e-09	5.0513e-08
Gm2a	ENSMUSG00000000594	0.61913	1.65786e-11	4.07269e-10
Sema4c	ENSMUSG00000026121	0.618533	0.00123607	0.00919582
Parp12	ENSMUSG00000038507	0.616444	0.000279495	0.00241947
Pmp22	ENSMUSG00000018217	0.61635	1.79475e-18	7.43498e-17
Usp28	ENSMUSG00000032267	0.615314	1.57375e-06	2.179e-05
Synj1	ENSMUSG00000022973	0.614814	0.00119064	0.00890932
Cenpa	ENSMUSG00000029177	0.612657	0.000650549	0.0052274
Fam167a	ENSMUSG00000035095	0.612357	1.1853e-05	0.000139386
Igf1	ENSMUSG00000020053	0.610492	3.16731e-06	4.15814e-05
Bmf	ENSMUSG00000040093	0.609623	0.00136164	0.00999531
Cfl1	ENSMUSG00000056201	0.607408	6.45123e-56	8.66821e-54
Klk10	ENSMUSG00000030693	0.60718	0.00050603	0.00415031
Elf4	ENSMUSG00000031103	0.604643	0.00100148	0.00765701
Rap1b	ENSMUSG00000052681	0.603691	8.53937e-15	2.73189e-13
Nacc2	ENSMUSG00000026932	0.602229	0.000376733	0.00316718
Cnp	ENSMUSG00000006782	0.601605	4.70537e-05	0.000488954
Postn	ENSMUSG00000027750	0.601565	3.76309e-73	6.32036e-71
C1qtnf1	ENSMUSG00000017446	0.601403	2.33464e-06	3.12878e-05
Pkd2	ENSMUSG00000034462	0.599304	0.00064228	0.00516363
Sh3bp5	ENSMUSG00000021892	0.595944	0.000232677	0.00205564
Zfp710	ENSMUSG00000048897	0.595707	0.0003423	0.00290138
Flna	ENSMUSG00000031328	0.594769	4.61828e-37	4.03173e-35
Abcd1	ENSMUSG00000031378	0.594376	8.29139e-05	0.000818649
Map7d1	ENSMUSG00000028849	0.592971	7.03762e-16	2.43824e-14
Gm46894		0.592682	1.64661e-23	8.74342e-22
Tbc1d1	ENSMUSG00000029174	0.591713	0.000173523	0.00157629
Lypd3	ENSMUSG00000057454	0.589631	7.66408e-14	2.27304e-12
Tln1	ENSMUSG00000028465	0.589306	3.05667e-18	1.24622e-16
Ampd3	ENSMUSG00000005686	0.588575	1.35858e-05	0.000157367
Atp8b2	ENSMUSG00000060671	0.58804	4.44155e-05	0.000465294

## Sheet: DEGseq_MARS_IMQ_model_down
Gene (148)	Ensembl Gene ID	log2.Fold_change	p.value	q.value.Benjamini
Paqr7	ENSMUSG00000037348	-3.78611	0	0
Elovl6	ENSMUSG00000041220	-0.649389	0	0
Serpina3b	ENSMUSG00000066364	-1.0545	1.31601e-241	1.07027e-238
Cfd	ENSMUSG00000061780	-0.718732	7.41848e-162	3.69776e-159
Cyp2e1	ENSMUSG00000025479	-1.48638	5.77354e-159	2.6239e-156
Pvalb	ENSMUSG00000005716	-0.988828	2.21473e-155	9.50612e-153
Msmo1	ENSMUSG00000031604	-0.651082	1.22409e-140	4.84991e-138
Mup22	ENSMUSG00000110439	-0.698926	6.69056e-133	2.52152e-130
Anxa8	ENSMUSG00000021950	-0.671964	8.00923e-123	2.63316e-120
Krt77	ENSMUSG00000067594	-2.91334	1.05699e-122	3.40262e-120
Tmem164	ENSMUSG00000047045	-0.899237	3.38309e-112	1.0053e-109
Myoz1	ENSMUSG00000068697	-0.651095	3.95522e-109	1.13178e-106
Echdc1	ENSMUSG00000019883	-0.693044	1.58339e-94	3.82289e-92
Acsbg1	ENSMUSG00000032281	-0.906229	1.44789e-93	3.33923e-91
Fcgbp	ENSMUSG00000047730	-1.21665	1.41908e-87	2.96319e-85
Hacd2	ENSMUSG00000035376	-0.598959	2.76046e-79	4.95984e-77
Acot1	ENSMUSG00000072949	-1.09371	8.73239e-74	1.48278e-71
Ces1d	ENSMUSG00000056973	-1.01612	5.37918e-64	8.22962e-62
Mup10	ENSMUSG00000078680	-0.726971	9.05382e-62	1.33238e-59
Sdr16c5	ENSMUSG00000028236	-0.976342	1.16787e-53	1.50383e-51
Tmem159	ENSMUSG00000030917	-1.06824	4.17124e-52	5.24016e-50
Prxl2a	ENSMUSG00000021792	-0.657754	1.52498e-45	1.6712e-43
Acad9	ENSMUSG00000027710	-0.605299	2.47709e-44	2.65805e-42
Ldah	ENSMUSG00000037669	-1.06902	1.82137e-41	1.7926e-39
Acox3	ENSMUSG00000029098	-0.676842	3.89756e-41	3.76407e-39
Pck1	ENSMUSG00000027513	-1.23773	8.73977e-39	8.03851e-37
Tmem45b	ENSMUSG00000041737	-0.609771	1.1577e-37	1.03403e-35
Lpcat3	ENSMUSG00000004270	-0.585896	3.96112e-37	3.47768e-35
Mylk4	ENSMUSG00000044951	-0.773803	8.77215e-37	7.5304e-35
Lce1m	ENSMUSG00000027912	-2.19922	7.82598e-32	5.87024e-30
Mstn	ENSMUSG00000026100	-1.19159	1.11967e-30	8.08468e-29
Aadacl2fm1	ENSMUSG00000036951	-1.38257	2.17847e-29	1.46995e-27
Acss2	ENSMUSG00000027605	-0.594473	2.15174e-28	1.41484e-26
Acaa1b	ENSMUSG00000010651	-1.27579	1.15669e-25	7.03666e-24
Slc39a11	ENSMUSG00000041654	-0.646169	1.60822e-24	9.238e-23
Hsd3b6	ENSMUSG00000027869	-0.645435	7.68476e-24	4.19593e-22
AAdacl4fm3	ENSMUSG00000041735	-0.685996	1.53957e-23	8.20326e-22
Acer1	ENSMUSG00000045019	-0.610835	6.77842e-23	3.46822e-21
Insig2	ENSMUSG00000003721	-0.753498	2.64519e-22	1.3185e-20
Ampd1	ENSMUSG00000070385	-0.692973	1.6544e-20	7.631e-19
Arrdc3	ENSMUSG00000074794	-0.662004	2.21447e-20	1.01537e-18
Cdo1	ENSMUSG00000033022	-0.751997	2.6791e-20	1.22117e-18
Mup2	ENSMUSG00000078688	-0.594046	3.59406e-20	1.6286e-18
Hmgcs2	ENSMUSG00000027875	-0.861176	1.36868e-19	5.97424e-18
Clca3a2	ENSMUSG00000028262	-0.606955	4.15785e-19	1.7797e-17
Pex16	ENSMUSG00000027222	-0.61945	2.17055e-18	8.94382e-17
Lce1a1	ENSMUSG00000057609	-0.947776	5.00418e-18	2.01892e-16
Lce1a2	ENSMUSG00000068890	-1.07524	1.13203e-16	4.16479e-15
Mup11	ENSMUSG00000073834	-0.747456	6.39974e-16	2.24747e-14
Flg2	ENSMUSG00000049133	-0.95359	4.66116e-15	1.5195e-13
Aldh1a1	ENSMUSG00000053279	-0.62132	1.52599e-14	4.80236e-13
Slc7a2	ENSMUSG00000031596	-0.83777	3.64854e-14	1.11198e-12
Awat2	ENSMUSG00000031220	-0.773473	4.79074e-14	1.44301e-12
Dhrs7c	ENSMUSG00000033044	-0.956009	8.08063e-14	2.39199e-12
Hephl1	ENSMUSG00000031936	-0.730753	2.29299e-13	6.51309e-12
Il22ra2	ENSMUSG00000039760	-2.20755	9.12278e-13	2.49938e-11
Emc9	ENSMUSG00000022217	-0.679224	1.22579e-12	3.32295e-11
Nudt17	ENSMUSG00000028100	-0.625744	2.60719e-12	6.81662e-11
Lrrc9	ENSMUSG00000021090	-1.58647	4.16912e-12	1.07012e-10
Dapl1	ENSMUSG00000026989	-1.36339	4.81957e-12	1.23094e-10
Pafah2	ENSMUSG00000037366	-0.643975	4.97995e-12	1.26771e-10
Fgfr2	ENSMUSG00000030849	-0.625748	5.09669e-12	1.2953e-10
Avpr1a	ENSMUSG00000020123	-0.927578	9.13452e-12	2.28024e-10
Chac1	ENSMUSG00000027313	-1.1473	1.04136e-11	2.59115e-10
Il1r2	ENSMUSG00000026073	-1.10574	1.38803e-11	3.42617e-10
Lgr6	ENSMUSG00000042793	-0.741253	1.93874e-11	4.74009e-10
Pnkd	ENSMUSG00000026179	-0.633885	4.81904e-11	1.13339e-09
Mup19	ENSMUSG00000078673	-0.766154	5.57047e-11	1.30219e-09
Lce1b	ENSMUSG00000027923	-0.823243	6.84589e-11	1.58357e-09
Alad	ENSMUSG00000028393	-0.585778	1.06667e-10	2.41675e-09
Lce1c	ENSMUSG00000042092	-0.800985	1.76398e-10	3.90503e-09
Hhatl	ENSMUSG00000032523	-0.701406	2.83329e-10	6.11452e-09
Abhd3	ENSMUSG00000002475	-0.967	7.41061e-10	1.53497e-08
Tm7sf2	ENSMUSG00000024799	-0.671832	7.45921e-10	1.54297e-08
Paqr5	ENSMUSG00000032278	-1.05656	1.52087e-09	3.03624e-08
Tnfrsf19	ENSMUSG00000060548	-0.685064	2.42199e-09	4.73729e-08
Dhrs7b	ENSMUSG00000042569	-0.616871	4.74388e-09	8.98314e-08
Lce1d	ENSMUSG00000103243	-0.745684	6.1629e-09	1.15429e-07
Pdzk1	ENSMUSG00000038298	-1.20875	6.81163e-09	1.26506e-07
Tgm3	ENSMUSG00000027401	-0.968817	6.85595e-09	1.27177e-07
Tmem184a	ENSMUSG00000036687	-0.910051	5.31217e-08	8.9611e-07
Cyp2b10	ENSMUSG00000030483	-0.593361	9.48632e-08	1.54623e-06
Lce1l	ENSMUSG00000046676	-0.952971	1.20554e-07	1.93036e-06
Slc1a1	ENSMUSG00000024935	-1.05779	1.3886e-07	2.21202e-06
Klf15	ENSMUSG00000030087	-0.614467	1.41214e-07	2.2426e-06
Mt4	ENSMUSG00000031757	-1.62422	2.11973e-07	3.29518e-06
Wnt3	ENSMUSG00000000125	-1.51466	2.66001e-07	4.07763e-06
Fbp2	ENSMUSG00000021456	-0.803676	2.90884e-07	4.44144e-06
Gm94	ENSMUSG00000071858	-0.645873	3.24231e-07	4.91178e-06
Gdpd2	ENSMUSG00000019359	-1.09477	4.2023e-07	6.27381e-06
Serpinb1c	ENSMUSG00000079049	-1.16383	5.42586e-07	7.93943e-06
Cyp2j12	ENSMUSG00000081225	-0.771589	1.33187e-06	1.86245e-05
Oas1f	ENSMUSG00000053765	-0.999478	1.54008e-06	2.13429e-05
Atp6v1b1	ENSMUSG00000006269	-1.67712	1.67554e-06	2.30753e-05
Ptch2	ENSMUSG00000028681	-1.22621	2.27928e-06	3.06523e-05
Shh	ENSMUSG00000002633	-3.61457	2.4078e-06	3.22124e-05
Lce1h	ENSMUSG00000049593	-0.923161	2.53074e-06	3.37112e-05
Gm16527		-0.733488	2.6232e-06	3.48228e-05
Krt73	ENSMUSG00000063661	-2.58675	3.07948e-06	4.04972e-05
Aqp4	ENSMUSG00000024411	-0.825091	5.07463e-06	6.41154e-05
Lce1i	ENSMUSG00000068888	-0.81993	5.12073e-06	6.4645e-05
Serpinb2	ENSMUSG00000062345	-0.60285	5.95592e-06	7.45793e-05
Slc1a3	ENSMUSG00000005360	-0.706861	6.61381e-06	8.1954e-05
Sema3d	ENSMUSG00000040254	-1.22301	8.66365e-06	0.000104505
Cyp3a57	ENSMUSG00000070419	-0.609363	1.05806e-05	0.00012586
A4gnt	ENSMUSG00000037953	-1.14026	1.22738e-05	0.000143569
Snap91	ENSMUSG00000033419	-0.684034	1.27346e-05	0.000148285
Pex11g	ENSMUSG00000069633	-0.623446	1.5766e-05	0.000181127
Tmem229a	ENSMUSG00000048022	-0.739312	2.13928e-05	0.0002385
Il20ra	ENSMUSG00000020007	-1.82634	2.16967e-05	0.000241366
Depp1	ENSMUSG00000048489	-0.63851	2.17927e-05	0.000242259
Fam13a	ENSMUSG00000037709	-0.620401	2.76054e-05	0.00029892
Bach2	ENSMUSG00000040270	-1.10215	2.95153e-05	0.000318485
Ctxn3	ENSMUSG00000069372	-0.661032	3.95369e-05	0.000417584
Mup15	ENSMUSG00000096674	-0.629343	4.09431e-05	0.000431256
Frem2	ENSMUSG00000037016	-0.713802	4.59843e-05	0.000479453
Lce1e	ENSMUSG00000068889	-0.762305	5.0839e-05	0.000525812
Serpinb7	ENSMUSG00000067001	-1.1453	6.23763e-05	0.00063244
LOC100861978		-1.05745	6.86985e-05	0.000689305
Krt28	ENSMUSG00000055937	-1.79746	7.52521e-05	0.000749707
Cbs	ENSMUSG00000024039	-0.795306	9.69755e-05	0.000944213
Lce1f	ENSMUSG00000042124	-0.604294	0.0001148	0.00109635
Slc6a4	ENSMUSG00000020838	-1.26027	0.000118403	0.00112657
Fosb	ENSMUSG00000003545	-1.4126	0.00012638	0.00119512
Golga7b	ENSMUSG00000042532	-1.67985	0.000128438	0.00121161
Mycl	ENSMUSG00000028654	-0.602399	0.000153583	0.00140925
Wnt7b	ENSMUSG00000022382	-0.589464	0.000166691	0.00151602
Amy1	ENSMUSG00000074264	-0.716655	0.00018785	0.0016935
Robo1	ENSMUSG00000022883	-0.842617	0.000240695	0.00212042
Serpina3g	ENSMUSG00000041481	-0.675102	0.00024964	0.00218924
Hs3st6	ENSMUSG00000039628	-0.979486	0.000258996	0.00225974
Akr1c14	ENSMUSG00000033715	-0.696527	0.000283288	0.00244956
Lce1g	ENSMUSG00000027919	-0.68594	0.000297202	0.00255985
Slc2a12	ENSMUSG00000037490	-0.696998	0.0003017	0.00258993
Sult5a1	ENSMUSG00000000739	-0.82795	0.000381428	0.00320143
Gm13306	ENSMUSG00000073877	-0.829975	0.000413335	0.00344119
Padi2	ENSMUSG00000028927	-0.60586	0.000507314	0.00415863
Mycn	ENSMUSG00000037169	-1.38434	0.000576379	0.00466294
Krt35	ENSMUSG00000048013	-1.6115	0.000604448	0.00487725
Ptger3	ENSMUSG00000040016	-0.930568	0.000620781	0.00500643
Arg2	ENSMUSG00000021125	-1.11481	0.000687855	0.00549857
Lce1j	ENSMUSG00000068887	-0.761882	0.000903922	0.00699069
Slc43a1	ENSMUSG00000027075	-0.690678	0.00100568	0.00767778
Pon1	ENSMUSG00000002588	-2.07441	0.00109215	0.00826439
Lce6a	ENSMUSG00000086848	-0.671054	0.00115155	0.00865453
Hlf	ENSMUSG00000003949	-0.648829	0.00123855	0.00920098
Lgals12	ENSMUSG00000024972	-0.80525	0.00127538	0.00943831
Fam241b	ENSMUSG00000020083	-0.76375	0.00135216	0.00993984
