# Supplementary material for: Loss of epidermal microRNA-149 sensitizes to skin inflammation
Source: Research Square preprint supplement (doi:10.21203/rs.3.rs-6047392/v1), 2025-07-29
Supplement: Supplementary file 3 [file 4db8925e1028d532255060dc.xlsx]

## Sheet: IMMUNE_leiden_2_080_DEG_P_by_sc
Cluster	Gene	P_adj	Log2FC	Scores
1	CCL3	9.3542e-40	9.81754	13.9455
1	CCL4	3.48426e-37	9.83737	13.4655
1	HDC	1.9318e-36	7.17237	13.3081
1	ACOD1	1.8326e-33	7.43052	12.7634
1	RUNX1	5.22096e-32	4.23318	12.4821
1	CD9	7.28689e-32	4.57801	12.441
1	IFITM1	1.54361e-31	6.90382	12.3685
1	CYP11A1	1.94474e-31	7.26033	12.3392
1	TEC	1.69065e-30	5.14628	12.1542
1	NEDD9	3.4295e-30	5.20882	12.0876
1	LILR4B	4.83707e-29	4.62251	11.8602
1	IER3	7.0072e-28	4.84465	11.6268
1	SLC24A3	4.01171e-27	4.84577	11.4699
1	SRGN	7.8897e-27	3.07402	11.4048
1	NEAT1	1.67743e-24	2.96621	10.9224
1	TAX1BP1	9.27669e-24	2.64491	10.76
1	NABP1	1.00745e-23	4.33159	10.7468
1	LILRB4A	2.16079e-23	3.98671	10.6658
1	CCL9	9.89513e-23	5.22597	10.5186
1	IL6	2.6999e-22	6.58106	10.419
1	CCL6	3.90917e-22	5.39524	10.3793
1	ARHGAP15	6.31989e-22	3.7833	10.3291
1	GZMB	5.93529e-19	6.33919	9.64618
1	IL1B	1.56008e-18	4.58055	9.53823
1	SQSTM1	2.15272e-17	2.42526	9.25805
1	AQP9	3.77629e-17	7.30711	9.19393
1	PLEK	7.01618e-17	3.04644	9.11606
1	CYP4F18	1.52802e-16	5.35866	9.02117
1	GSR	2.19023e-16	4.11553	8.97846
1	SAMSN1	3.51773e-16	2.75374	8.92002
1	BCAR3	5.9055e-16	5.55666	8.85949
1	LITAF	6.2731e-16	2.42515	8.84986
1	SUB1	9.17128e-16	2.19921	8.80453
1	FTL1	9.55569e-16	2.45767	8.79715
1	ERO1L	1.29231e-15	4.00556	8.76048
1	SATB1	4.34105e-15	3.97745	8.61495
1	GATA2	5.1931e-15	6.11327	8.59187
1	MIRT1	8.17907e-15	4.70119	8.53705
1	GTDC1	1.17177e-14	3.51581	8.49295
1	NFKB1	2.05326e-14	2.05684	8.42512
1	OSM	3.43486e-14	5.13165	8.36228
1	GM43661	3.97143e-14	4.76699	8.34051
1	FXYD5	1.14572e-13	1.81228	8.21202
1	CSF2RB2	1.95054e-13	4.16572	8.14564
1	ACTG1	2.24886e-13	1.52626	8.12618
1	ZEB2	4.46635e-13	2.69329	8.04034
1	CD200R3	7.49556e-13	5.88886	7.97413
1	IRAK3	7.49556e-13	4.23193	7.97232
1	CSF2RB	2.03161e-12	3.11127	7.84558
1	MCPT8	2.03161e-12	10.8108	7.84394
2	CLEC4D	2.97065e-236	6.10756	33.1101
2	SRGN	2.65875e-217	3.4813	31.7315
2	SLC7A11	1.96389e-204	5.45382	30.7795
2	TYROBP	2.72056e-183	4.07011	29.121
2	S100A8	1.24584e-180	8.75212	28.9084
2	PIK3AP1	2.47416e-172	5.49799	28.2291
2	GSR	6.16922e-169	5.06282	27.9498
2	ENTPD1	3.18406e-155	5.30351	26.7811
2	FTH1	5.40712e-153	2.25958	26.5859
2	ARG2	8.07712e-143	6.20519	25.6775
2	ACOD1	9.44669e-143	6.34948	25.6709
2	IFITM2	1.05687e-142	3.79653	25.666
2	ANKRD33B	3.57796e-142	5.68554	25.618
2	CD14	3.65355e-139	4.48128	25.344
2	MXD1	2.52526e-124	4.24503	23.9526
2	XYLT1	4.79261e-122	3.54002	23.73
2	CXCL2	6.44659e-120	4.26982	23.5221
2	HDC	3.38294e-119	4.94991	23.4512
2	SLPI	1.6935e-117	6.01243	23.2833
2	ANTXR2	6.63548e-112	3.31468	22.7225
2	S100A9	9.10801e-110	8.51431	22.5045
2	CLEC4E	3.07356e-108	4.20888	22.3471
2	FTL1	4.34523e-107	2.14769	22.2274
2	SGMS2	5.61578e-106	5.02492	22.1114
2	THBS1	6.35583e-106	4.04184	22.1055
2	CSF3R	1.07201e-101	6.54869	21.6612
2	LMNB1	9.126e-100	3.2201	21.4544
2	EIF1	6.28399e-99	1.1701	21.3638
2	BTG1	1.54972e-96	1.73652	21.1032
2	GRINA	2.63656e-95	4.78852	20.968
2	IFITM1	2.65632e-95	5.57425	20.9673
2	SORL1	1.29567e-90	4.47756	20.4455
2	IL1B	3.99781e-90	3.51393	20.3901
2	SYK	5.3344e-90	3.39982	20.3756
2	LILR4B	1.29662e-89	3.37944	20.3318
2	IL1R2	1.00546e-87	3.51431	20.1161
2	ALCAM	7.0156e-84	2.7935	19.67
2	MIRT1	1.73838e-82	5.89098	19.5059
2	CD9	6.74349e-82	2.75652	19.4362
2	ZEB2	5.54509e-80	2.73483	19.2073
2	CCR1	1.08505e-79	4.99308	19.1721
2	LILRB4A	1.61878e-79	3.21078	19.1509
2	S100A11	5.98122e-79	1.97827	19.0824
2	RESF1	1.76355e-71	2.9224	18.1589
2	ETS2	3.23558e-70	3.37166	17.9978
2	H3F3B	3.25962e-70	1.18503	17.997
2	IGF1R	7.70983e-68	2.93634	17.6892
2	SH2D3C	2.50868e-65	6.64038	17.358
2	UBB	6.4361e-65	1.12374	17.3035
2	GAB2	1.96946e-63	2.40525	17.1035
3	PSAP	0	3.68846	43.2015
3	LYZ2	0	5.13174	40.6062
3	CTSS	0	3.53845	39.1012
3	LGMN	0	4.91715	37.8283
3	CTSB	1.19779e-270	3.31791	35.3936
3	HMOX1	3.26681e-259	4.37827	34.637
3	ZEB2	4.9011e-254	3.07706	34.283
3	TGFBI	3.45632e-236	3.39463	33.0601
3	RBM47	1.41709e-229	3.66612	32.5935
3	THBS1	1.24724e-222	4.07331	32.0966
3	NPC2	3.50156e-220	2.33388	31.9179
3	FTL1	7.53525e-209	1.95486	31.0879
3	ABCA1	1.91718e-202	3.15264	30.6079
3	LGALS3	1.67284e-195	1.86783	30.0795
3	CD14	9.25573e-194	3.29043	29.9438
3	LAMP1	1.36688e-173	2.71598	28.3482
3	CLEC4E	2.52895e-172	3.3717	28.2433
3	SLFN2	4.73824e-172	2.65412	28.2193
3	CYBB	9.82325e-170	4.34426	28.0281
3	SYK	2.50716e-169	2.81388	27.993
3	APP	1.42024e-151	2.20812	26.4883
3	SLC7A11	3.93952e-145	2.92757	25.9201
3	CSTB	4.79228e-144	2.03816	25.8223
3	TRIM25	4.83103e-144	2.9473	25.8207
3	CYBA	6.06958e-142	1.8862	25.6318
3	TYROBP	7.81758e-142	2.23833	25.6207
3	APOE	1.37474e-141	2.93516	25.5975
3	CLEC4D	3.82207e-138	2.73273	25.284
3	PLIN2	1.09188e-136	3.27501	25.1501
3	MRC1	6.23639e-133	3.83848	24.8033
3	LILRB4A	1.88558e-131	2.34127	24.6635
3	FNIP2	3.73723e-129	2.7139	24.4475
3	PRDX1	1.21516e-127	2.14243	24.3039
3	EFHD2	4.20938e-127	2.13665	24.2518
3	PLA2G7	4.40141e-124	3.17978	23.9629
3	B2M	7.64868e-124	1.23788	23.9389
3	IER3	1.31324e-122	2.3305	23.8191
3	RBMS1	5.25972e-121	1.73298	23.663
3	CTSZ	2.35734e-119	2.00724	23.4994
3	PID1	4.85944e-119	3.09267	23.4678
3	PLEK	7.39717e-119	1.95345	23.4491
3	MDFIC	3.9487e-117	2.39786	23.2767
3	CCL9	9.02128e-117	3.3132	23.2404
3	AIF1	4.18976e-115	3.2533	23.0735
3	TXNRD1	3.32421e-113	1.78325	22.8812
3	ANXA5	1.28821e-111	1.6219	22.7204
3	ESD	4.53811e-111	2.04253	22.6643
3	ATP6V0C	3.29986e-110	1.34819	22.5747
3	RILPL2	1.07791e-107	2.62675	22.3146
3	MAFB	3.45982e-107	3.62531	22.2618
4	MGL2	6.90883e-282	5.38042	36.1613
4	CD74	1.86978e-277	5.41019	35.8588
4	H2-AB1	1.36837e-268	4.80003	35.274
4	H2-AA	7.70334e-259	4.70246	34.6239
4	TMSB4X	2.1414e-246	1.70939	33.7803
4	H2-EB1	5.89031e-237	4.41546	33.1257
4	TNIP3	1.20069e-217	4.01509	31.7517
4	IFI30	8.87198e-201	3.09903	30.5008
4	H2-DMB1	3.60995e-190	3.03612	29.686
4	SYNGR2	6.90215e-182	2.69073	29.0337
4	WFDC17	1.27802e-178	3.12183	28.7704
4	PLBD1	1.51827e-175	2.88741	28.5205
4	PSAP	1.56624e-175	2.54718	28.5166
4	H2-DMA	2.67102e-173	2.80849	28.3334
4	LSP1	9.114e-173	2.44846	28.2877
4	MARCKS	6.48041e-172	2.90242	28.2161
4	CTSS	1.47485e-171	2.57281	28.1848
4	LYZ2	2.75295e-171	3.35995	28.1606
4	CCDC88A	1.11159e-162	3.0237	27.4469
4	CD83	1.09358e-159	2.83764	27.1931
4	RFTN1	3.17897e-159	3.02583	27.1521
4	ETV3	2.66457e-155	3.01335	26.8161
4	IL1B	5.82193e-155	3.46574	26.7853
4	CD86	2.80273e-153	2.644	26.6389
4	CRIP1	5.83235e-150	2.20922	26.3493
4	ATOX1	7.59097e-145	2.05899	25.8977
4	CYBA	3.7217e-135	2.02363	25.0211
4	ACTB	1.2797e-134	1.32106	24.9704
4	REL	4.81191e-132	1.92661	24.7307
4	NAAA	2.09862e-129	3.58119	24.4828
4	RPS27L	3.30571e-129	2.15646	24.4629
4	CST3	3.57953e-125	2.1899	24.0795
4	GM2A	3.73721e-125	2.03518	24.0764
4	ETV6	1.39612e-118	1.95765	23.4393
4	CD209D	3.95696e-116	5.85885	23.1963
4	GDI2	7.00617e-116	1.76432	23.1705
4	CSF2RA	7.41887e-116	2.3257	23.1669
4	NPC2	1.59748e-115	1.77035	23.1326
4	MRC1	5.68662e-115	2.81851	23.0767
4	NRP2	5.55196e-114	3.09472	22.9768
4	SH3BGRL	1.55317e-112	2.15456	22.8305
4	CLIC4	1.0516e-110	1.84684	22.6445
4	SDC4	5.62945e-109	2.05993	22.4673
4	SPI1	1.24427e-107	2.17321	22.3283
4	NAPSA	4.26122e-107	2.43521	22.2722
4	PLEK	1.10774e-106	2.00951	22.2284
4	SLFN2	3.82259e-106	2.13987	22.1718
4	SEC61B	4.71781e-106	1.67626	22.1613
4	APP	1.03126e-105	1.91168	22.1252
4	RPS29	7.46031e-104	1.20573	21.9303
5	CST3	1.92787e-50	5.53394	15.6034
5	WDFY4	2.10613e-36	5.36257	13.332
5	H2-AB1	5.62892e-36	4.89948	13.228
5	PLBD1	2.46626e-35	3.86022	13.0946
5	TMSB4X	1.36547e-34	2.00927	12.9453
5	H2-AA	1.36547e-34	4.70364	12.9329
5	ACTB	8.92463e-33	1.99039	12.5954
5	LSP1	1.54536e-32	3.10483	12.5414
5	H2-EB1	2.60521e-32	4.57238	12.4906
5	NAAA	2.9583e-32	4.31815	12.4721
5	CD74	3.0509e-31	5.12651	12.2737
5	ITGA1	3.0509e-31	5.31276	12.2701
5	NAGA	1.20347e-30	3.87889	12.1519
5	ATOX1	2.82277e-29	2.6843	11.885
5	PSAP	3.48226e-29	3.0754	11.8617
5	H2-DMB1	6.75954e-29	3.19746	11.8006
5	MPEG1	7.10822e-29	3.74363	11.7913
5	HTR7	1.22521e-28	4.98807	11.7405
5	CDK14	1.62044e-28	3.58326	11.7123
5	AIF1	2.89574e-28	3.5115	11.657
5	ACTG1	2.89574e-28	1.78349	11.6544
5	UVRAG	3.23458e-28	2.86366	11.641
5	SYNGR2	1.12566e-27	2.85136	11.5304
5	IRF5	1.80739e-27	3.29142	11.4859
5	CKB	2.88044e-26	3.75796	11.2405
5	PKIB	3.90541e-26	3.84961	11.2101
5	2024-09-03	1.01493e-25	4.81696	11.1219
5	VAV3	2.31006e-25	2.93505	11.045
5	LRRK2	1.53798e-24	4.38959	10.8703
5	H2AFZ	2.38425e-24	2.21283	10.8271
5	S100A11	6.76794e-24	2.16085	10.7281
5	RPS11	2.22284e-23	1.46808	10.6146
5	PSME1	3.55133e-23	2.53442	10.5679
5	TMSB10	1.70631e-22	2.1402	10.4168
5	PSMB8	3.35248e-22	2.68272	10.3496
5	RAB7B	2.48692e-21	3.6386	10.1532
5	TGFBI	3.17866e-21	2.63183	10.1265
5	SKAP2	6.19674e-21	2.40941	10.0584
5	ALOX5AP	7.64832e-21	2.53775	10.0351
5	POMP	1.96499e-20	2.24783	9.93904
5	FYN	2.28058e-20	2.34037	9.92172
5	SLAMF7	2.79581e-20	3.45342	9.89896
5	FMNL2	5.74145e-20	2.75452	9.82436
5	LRRK1	8.21509e-20	3.4876	9.78384
5	PRKAR2A	8.21509e-20	3.62919	9.7836
5	KLRB1B	1.58111e-19	3.02579	9.7149
5	RPSA	1.92168e-19	1.41532	9.69281
5	CRIP1	2.96925e-19	2.26399	9.64612
5	PFKP	3.0586e-19	2.21817	9.64096
5	ERLIN1	4.56809e-19	3.6554	9.59762
6	CCR7	1.71275e-29	6.04352	12.1445
6	CACNB3	1.186e-27	7.99509	11.7344
6	TMEM123	1.08979e-26	3.38484	11.5103
6	LSP1	5.43335e-26	3.76906	11.3458
6	FSCN1	6.70352e-25	9.76132	11.1039
6	CST3	1.15886e-24	4.53245	11.0385
6	CERS6	5.54285e-23	3.87235	10.6711
6	TMCC3	1.50184e-22	4.2999	10.5639
6	TMSB4X	1.50184e-22	2.19706	10.5545
6	STRIP2	4.98901e-22	5.26268	10.4312
6	CALM1	7.90787e-22	2.31602	10.3782
6	MREG	9.68794e-22	5.29782	10.3505
6	RFTN1	1.298e-21	3.79136	10.3093
6	TBC1D4	1.298e-21	4.33849	10.3076
6	LY75	1.87088e-21	4.46382	10.2658
6	GPR137B	3.72607e-21	3.62503	10.1928
6	LRRK1	5.2862e-21	4.10938	10.1528
6	CCL22	8.99421e-21	6.67648	10.0952
6	IFI30	3.99708e-20	3.55161	9.94246
6	PSME2	1.10927e-19	3.45671	9.83513
6	SAMSN1	1.15644e-19	2.9889	9.82602
6	CD63	2.06029e-19	3.57393	9.75845
6	ITGA4	5.13118e-19	4.65472	9.6611
6	ACTB	5.49209e-19	2.0259	9.64995
6	PSMB8	5.66375e-19	3.18823	9.64277
6	TBC1D8	7.6485e-19	5.57552	9.608
6	ANXA3	2.6587e-18	5.86162	9.47504
6	CD40	6.06238e-18	4.22706	9.3849
6	MMP25	2.26627e-17	4.0719	9.2405
6	PLXNC1	2.26627e-17	3.37957	9.23779
6	MYO1G	2.58399e-17	2.96717	9.22033
6	RABGAP1L	3.02869e-17	2.80228	9.19862
6	SYNGR2	3.02869e-17	2.89759	9.19678
6	KTN1	3.13085e-17	3.39061	9.19009
6	SERPINB9	3.41664e-17	3.99875	9.17766
6	BASP1	3.5275e-17	3.2207	9.17126
6	FCHSD2	3.87215e-17	3.78978	9.15833
6	ADAM23	5.43271e-17	4.78525	9.1189
6	MARCKS	7.09288e-17	3.16225	9.0872
6	ZMYND15	3.56807e-16	6.27939	8.90707
6	MRTFA	4.9627e-16	2.81859	8.86772
6	IRF8	7.67585e-16	4.11751	8.81637
6	RELB	1.31782e-15	2.49952	8.75303
6	PSME1	1.37425e-15	2.8379	8.74576
6	CLIC4	2.3363e-15	2.46051	8.68315
6	BMP2K	3.56344e-15	2.95543	8.63257
6	ROGDI	5.86614e-15	4.68043	8.57296
6	SOCS2	1.11482e-14	3.98481	8.49634
6	ETV3	1.47146e-14	2.95481	8.46169
6	EPSTI1	1.49555e-14	4.26055	8.45749
7	CD207	0	9.49151	42.5895
7	MFGE8	0	8.37588	42.5535
7	TBC1D4	0	6.38926	41.4247
7	IL1R2	0	5.7165	40.4645
7	H2-EB1	0	5.5292	40.3575
7	CD74	0	5.95704	39.9207
7	CST3	0	4.69535	39.326
7	PXDC1	0	4.489	38.6575
7	LTC4S	0	7.36735	38.5966
7	H2-AB1	0	5.37861	38.5664
7	H2-AA	0	5.27213	38.3364
7	CLDN1	0	5.52051	38.0819
7	H2-M2	7.34508e-292	6.50717	36.7206
7	CACNB2	1.05842e-288	6.25492	36.5202
7	HPGDS	2.63418e-286	4.80934	36.367
7	TNFAIP2	9.14109e-273	4.29392	35.4982
7	H2-DMA	5.57027e-271	3.93763	35.3806
7	SCIN	6.81779e-266	6.09599	35.0466
7	HAPLN3	1.29398e-264	7.5886	34.961
7	CCSER1	1.18391e-263	6.20659	34.8962
7	LY75	5.27763e-253	4.68186	34.1855
7	PTGS1	1.94234e-251	5.69989	34.0786
7	MYO10	2.18347e-251	4.27761	34.0739
7	CD86	8.25216e-251	3.71418	34.0336
7	CACNA1E	1.27253e-240	6.93275	33.3366
7	CXCL16	3.75252e-232	3.42424	32.7457
7	ANTXR2	3.26806e-223	3.43116	32.1104
7	PGF	8.45181e-223	6.0348	32.0796
7	H2-DMB1	1.01876e-212	3.29297	31.3473
7	EPCAM	5.39065e-212	4.5287	31.2931
7	EDIL3	5.6797e-207	4.52609	30.9206
7	SCP2	3.00092e-206	2.70227	30.8658
7	PRKCB	2.6953e-203	3.32423	30.6439
7	CD83	4.76934e-200	3.41562	30.3982
7	PKIB	4.52898e-196	3.92107	30.0947
7	CD72	1.80131e-195	4.35011	30.0479
7	MTHFS	3.81845e-194	3.68976	29.9453
7	ALOX5	8.73496e-194	5.40774	29.9168
7	CD9	4.55502e-190	2.84073	29.6288
7	CSF1R	3.94045e-189	3.2524	29.5551
7	HAVCR2	1.48247e-188	2.8245	29.5095
7	CALM1	1.5128e-188	1.80988	29.508
7	MALT1	2.938e-187	2.66608	29.4066
7	NLRP3	3.46786e-187	3.32897	29.4002
7	CTNNA1	2.00536e-185	2.60337	29.2612
7	PAK1	1.60343e-184	2.92615	29.1894
7	NDRG1	1.76782e-183	2.68833	29.1064
7	H2-DMB2	1.88218e-181	4.86721	28.9451
7	IL18	1.14572e-176	4.32865	28.5617
7	CXCL2	1.6039e-172	4.10318	28.2252
8	MCPT4	1.98902e-262	12.412	34.9012
8	CMA1	2.93232e-261	13.025	34.8042
8	CPA3	3.32362e-248	11.4187	33.9184
8	TPSB2	8.70659e-243	11.6718	33.5403
8	SERPINB1A	2.08398e-164	5.89795	27.6395
8	HDC	7.47039e-132	5.61807	24.7703
8	MRGPRB1	1.29635e-119	10.0608	23.5921
8	VIM	8.28655e-100	2.01233	21.558
8	NDRG1	8.7458e-100	3.10085	21.5525
8	FCER1A	1.18253e-97	9.21107	21.3161
8	VWA5A	3.56459e-94	5.05503	20.9266
8	TPSAB1	1.82292e-84	9.52593	19.8178
8	LMNA	1.53172e-75	2.25306	18.7461
8	RAB27B	3.20613e-74	5.31959	18.5795
8	CCL7	5.53163e-73	6.35233	18.4222
8	PLEK	4.57329e-72	2.69	18.3051
8	AHNAK	1.40169e-69	1.7698	17.9838
8	CYP11A1	1.79483e-66	6.71497	17.5746
8	IL1RL1	7.56633e-65	4.96196	17.3583
8	BASP1	8.68577e-65	3.12866	17.3486
8	RPL41	1.40983e-59	0.963392	16.6284
8	MS4A2	9.10618e-59	8.62552	16.5115
8	CD55	3.23275e-57	6.30374	16.2892
8	TPT1	8.79663e-54	0.841805	15.7893
8	PAKAP	6.71545e-52	3.90488	15.5097
8	FTL1	1.42531e-50	1.49614	15.3082
8	SRGN	3.56432e-49	1.37842	15.0949
8	ARHGDIB	3.84713e-49	1.95665	15.0889
8	TPH1	4.49359e-49	8.8116	15.0782
8	FDX1	1.9294e-48	5.54239	14.9793
8	GNAI1	6.58995e-48	5.60477	14.8952
8	JUND	7.82051e-43	2.73387	14.0743
8	RPS12	1.80923e-42	1.01501	14.0135
8	HS6ST2	6.26727e-42	5.13526	13.9225
8	PDE4D	9.01012e-40	2.68915	13.5561
8	H2AFZ	5.24152e-32	1.08532	12.1384
8	CTLA2A	2.34942e-31	2.11918	12.012
8	CMTM7	8.92688e-31	3.37749	11.8976
8	GATA2	2.19735e-30	6.27559	11.8189
8	CSF2RB	2.42482e-30	2.09411	11.8102
8	LAT2	1.01693e-29	3.30813	11.6859
8	KIT	3.55076e-29	3.94747	11.5754
8	CD81	6.3876e-29	3.73149	11.5235
8	FCER1G	1.37153e-28	1.31032	11.4555
8	TPSG1	1.63739e-28	9.94063	11.4398
8	PRKCB	2.92548e-28	2.75108	11.3878
8	PMP22	1.81201e-27	2.94978	11.2224
8	CSF2RB2	4.19198e-27	3.19097	11.1453
8	RPS24	4.83651e-27	0.750882	11.1323
8	SLC6A4	1.00298e-25	5.60067	10.8497
9	EBF1	1.31958e-07	10.7542	6.91355
9	ARHGAP15	1.84699e-06	4.70555	6.42449
9	IGHM	2.03141e-06	6.51799	6.34789
9	AFF3	2.71201e-06	5.75855	6.25855
9	BACH2	8.37508e-06	4.59237	6.04437
9	DOCK2	4.61544e-05	3.08536	5.71504
9	FOXP1	4.61544e-05	3.43918	5.70591
9	NFATC3	7.19285e-05	4.59819	5.59961
9	SATB1	0.000105599	4.6875	5.48389
9	PAX5	0.000449935	14.6153	5.18996
9	CD79A	0.000449935	10.2759	5.18161
9	IGKC	0.000449935	9.77081	5.17688
9	HSPE1	0.000995329	2.85122	5.01128
9	SYK	0.00110483	3.8437	4.96907
9	HEG1	0.00236094	4.3943	4.76802
9	BANK1	0.00256396	9.35581	4.74237
9	RPS27	0.00448749	1.65889	4.61043
9	CD37	0.00457482	3.82882	4.59825
9	RPS15A	0.00902941	1.52346	4.43051
9	SERINC3	0.00902941	2.14265	4.42369
9	SNX5	0.00930949	3.31146	4.41
9	HMGN1	0.0096415	3.05401	4.39551
9	RIPOR2	0.0162249	3.212	4.24868
9	MALAT1	0.0178151	1.22479	4.21582
9	MT-ND2	0.0195706	1.52373	4.18883
9	MEF2C	0.0218573	5.68002	4.15253
9	LY6E	0.0232046	2.56926	4.13342
9	ABLIM1	0.0252748	3.56578	4.09318
9	AKT3	0.0263417	2.85158	4.07869
9	MT-CYTB	0.0276865	1.27028	4.06229
9	BLNK	0.0283491	5.07944	4.05124
9	CAMK2D	0.0283491	2.93989	4.04741
9	GM26740	0.0315745	3.83577	4.00429
9	XYLT1	0.0315745	2.68888	4.00429
9	RPL12	0.033432	1.52288	3.98648
9	RPL18A	0.0454816	1.44232	3.90019
9	RAPGEF6	0.0493987	1.94047	3.86806
9	DIPK1A	0.0552921	4.04952	3.83655
9	KCNQ5	0.0562544	3.6786	3.82844
9	GM8369	0.0644995	6.26764	3.79079
9	TMEM163	0.0763175	5.41566	3.74119
9	RPL36A	0.0834499	1.6288	3.71301
9	ASH1L	0.0834499	2.18973	3.70759
9	RPS19	0.0946194	1.37226	3.67203
9	RPL8	0.108544	1.32529	3.63319
9	BLK	0.118635	4.60612	3.60219
9	SLC9A7	0.118635	4.68262	3.5996
9	DOCK11	0.126905	2.6981	3.57858
9	PKIG	0.131755	4.53948	3.55626
9	ARHGEF18	0.131755	4.58287	3.5553
10	IL23R	1.43619e-211	6.19364	31.3703
10	RORA	2.75584e-193	4.04074	29.9767
10	EMB	1.52367e-183	3.39141	29.2058
10	IL2RA	8.57745e-163	4.77617	27.5129
10	ST6GALNAC3	3.34889e-139	3.98207	25.4492
10	IKZF3	8.45406e-139	3.58213	25.4068
10	BLK	5.9112e-124	6.97957	24.0206
10	CAMK4	2.52719e-122	3.30871	23.8591
10	AU020206	7.40035e-115	3.12538	23.1241
10	FAM129A	2.76231e-114	2.6359	23.063
10	NFKB1	3.9255e-109	1.89861	22.5399
10	ETS1	2.43435e-106	2.58646	22.2498
10	FNBP1	4.55701e-105	2.02269	22.1115
10	IGF1R	1.23912e-103	2.77499	21.959
10	AEBP2	1.31215e-103	2.54879	21.9537
10	CXCR6	1.30875e-101	3.25376	21.7408
10	ICOS	2.98513e-97	3.0456	21.2727
10	5830411N06RIK	2.13017e-96	6.71772	21.1779
10	NR3C1	1.15324e-93	2.27387	20.877
10	ODC1	1.23539e-92	2.38781	20.7611
10	CYFIP2	1.13553e-86	2.94689	20.0841
10	UHRF2	8.68608e-85	2.32392	19.8655
10	IL17F	5.16131e-83	6.39077	19.6575
10	FURIN	4.52521e-81	2.11904	19.4273
10	GPR183	2.73765e-80	2.914	19.3328
10	HIVEP2	4.05371e-76	2.12584	18.8274
10	AHCYL2	8.23354e-75	2.37965	18.6639
10	ERN1	1.17441e-74	2.14454	18.6433
10	FRYL	6.71269e-73	2.04956	18.4241
10	LY6A	2.2816e-72	2.96064	18.3563
10	SRGN	4.95632e-72	1.54688	18.3126
10	PIM1	6.88985e-72	1.66045	18.2932
10	ITK	7.76017e-71	2.21456	18.1593
10	KDM2B	1.18793e-70	2.15142	18.1345
10	CISH	8.21681e-70	2.52868	18.0239
10	PDE4B	8.96112e-69	1.82203	17.89
10	NRIP1	1.83273e-68	2.37746	17.8488
10	ZNRF1	4.66357e-68	2.37719	17.7953
10	LGALS1	1.01511e-67	1.61889	17.7505
10	DENND5A	7.53976e-67	1.98421	17.6363
10	ANKRD12	1.20285e-64	1.68522	17.3461
10	OLFR60	1.6941e-64	4.01706	17.3252
10	RAMP1	1.00652e-62	2.47853	17.0875
10	THY1	3.8182e-62	2.22708	17.0073
10	MT-CO3	3.94975e-62	1.00447	17.0042
10	ZHX2	1.8413e-61	1.81139	16.9127
10	MIR155HG	5.81116e-60	2.70656	16.707
10	SYTL3	1.56876e-59	2.04489	16.6466
10	IL1R1	3.26922e-59	3.25343	16.6015
10	CD69	1.3082e-58	3.34052	16.5171
11	IKZF2	9.67339e-111	5.86075	22.8123
11	CTLA4	7.0205e-97	6.03046	21.3381
11	CAMK4	9.75373e-89	4.12967	20.4228
11	TOX	9.16996e-86	4.09768	20.0714
11	ICOS	7.93947e-77	4.05696	19.0095
11	RORA	2.90193e-75	3.57646	18.8101
11	SH3RF1	5.80839e-68	5.22635	17.8882
11	CD2	2.91342e-67	3.61856	17.7907
11	IL1RL1	1.64267e-61	5.0819	17.014
11	GM26740	7.70338e-61	3.94441	16.9181
11	ETS1	7.52983e-59	2.81981	16.6412
11	FOXP3	9.9955e-58	8.12017	16.4811
11	SNTB1	9.90069e-55	4.10368	16.0545
11	VPS54	1.14665e-53	3.38162	15.8977
11	TNFRSF9	3.51139e-52	3.04377	15.678
11	FAM107B	1.18751e-49	2.30899	15.2999
11	H2-K1	1.76763e-48	1.76795	15.1196
11	ITGAE	3.84331e-48	3.11077	15.065
11	IL2RA	6.31779e-48	3.64562	15.0288
11	IL7R	1.66631e-45	2.41752	14.6487
11	NR3C1	5.2857e-45	2.35127	14.5672
11	ODC1	3.13374e-44	2.34721	14.4422
11	TANK	2.60847e-43	2.33897	14.2927
11	MYO3B	4.04754e-42	5.20062	14.0953
11	ITGAV	5.68054e-42	2.40586	14.0689
11	MALAT1	8.19691e-41	1.12688	13.8764
11	IL18R1	1.83941e-40	3.20792	13.8159
11	TNFRSF4	2.73737e-40	4.87231	13.785
11	LDLRAD4	4.527e-40	2.47564	13.7464
11	TRAF3	2.23397e-39	2.64347	13.6282
11	TTC39C	8.52314e-39	3.0216	13.528
11	IKZF3	1.15808e-38	2.90311	13.5034
11	TNRC6B	1.65067e-38	2.0502	13.4752
11	DOCK2	1.26066e-37	1.9295	13.3224
11	EMB	1.26509e-37	2.16774	13.3202
11	ARID5B	1.83924e-37	2.44503	13.2903
11	HACD3	2.54233e-37	2.44151	13.2642
11	FYB	4.33343e-37	2.17041	13.2224
11	FAM169B	7.54962e-37	4.53011	13.1788
11	STAT5B	1.89722e-36	2.8087	13.1073
11	SKAP1	1.03822e-35	2.44325	12.976
11	ITGB8	1.32357e-35	6.06117	12.9541
11	PTPRC	3.72815e-35	1.54424	12.8727
11	MBNL1	6.15917e-34	1.58407	12.6527
11	LAMC1	6.67391e-33	3.12292	12.4616
11	GM20275	6.67391e-33	3.95102	12.4602
11	CCDC88C	1.73528e-32	2.6674	12.3814
11	TNFRSF18	1.31462e-31	2.85041	12.2163
11	INPP4B	2.89506e-31	2.85938	12.149
11	CPM	3.72534e-31	4.06691	12.1269
12	RORA	4.33332e-298	4.11124	37.1779
12	NR3C1	1.32906e-253	3.19411	34.2944
12	EMB	1.62301e-240	3.12055	33.3928
12	ICOS	4.9458e-217	4.04345	31.7177
12	IKZF3	3.46122e-210	4.11961	31.2115
12	ETS1	8.10436e-200	2.92009	30.4327
12	CAMK4	6.65732e-168	3.2335	27.912
12	PTPN22	4.54265e-149	2.57946	26.3102
12	IL18R1	3.45313e-145	3.66624	25.9648
12	PPP1R16B	3.69494e-145	2.79257	25.9586
12	CD28	3.75074e-140	4.16933	25.5047
12	AKAP13	6.85293e-140	1.61487	25.4782
12	RNF125	1.10508e-138	2.486	25.3663
12	TNFSF8	1.82564e-137	4.36838	25.2531
12	HIVEP2	2.3559e-137	2.34923	25.2407
12	UHRF2	1.07609e-136	2.50905	25.1782
12	INPP4B	5.3056e-136	3.4403	25.1127
12	AR	2.56869e-134	2.96071	24.956
12	OSTF1	6.40534e-131	2.0708	24.6391
12	HLF	4.78204e-129	3.6389	24.4618
12	SKAP1	6.43985e-125	2.54508	24.0688
12	MALAT1	1.83035e-124	1.02352	24.0237
12	AEBP2	1.63896e-123	2.44515	23.9307
12	IFNGR1	2.03826e-121	2.26865	23.7254
12	ODC1	2.76607e-119	2.1764	23.5164
12	ITK	1.71311e-117	2.32014	23.3362
12	ST6GALNAC3	1.86404e-117	3.23651	23.3312
12	SSH2	7.00097e-115	2.14867	23.0735
12	GRAP2	1.81904e-111	2.35295	22.7284
12	MBNL1	4.75777e-109	1.56104	22.4814
12	RUNX1	1.39992e-108	2.01469	22.4311
12	CXCR6	1.22433e-104	3.048	22.0225
12	STK4	2.71563e-101	2.10041	21.6694
12	IL18RAP	1.46096e-97	3.08473	21.269
12	CD6	3.66136e-97	4.82195	21.2248
12	TEX2	1.7906e-96	2.55694	21.1489
12	H2-K1	3.77746e-96	1.31374	21.1116
12	NDFIP1	2.18591e-90	1.50965	20.4729
12	FYB	1.41606e-89	1.90147	20.3796
12	ERN1	8.73793e-89	2.02236	20.2894
12	FNBP1	8.27227e-88	1.48843	20.1776
12	FLI1	1.32042e-85	2.18436	19.9224
12	CD2	2.02614e-84	2.54452	19.7834
12	RUNX2	5.35212e-82	1.91092	19.4976
12	FAM107B	9.15014e-82	1.63467	19.4685
12	IQGAP2	3.7406e-80	2.12582	19.2766
12	AU020206	4.77087e-77	2.30266	18.9014
12	DOCK2	1.073e-76	1.52668	18.8578
12	SLAMF1	4.06736e-76	3.64927	18.7864
12	BHLHE40	5.43187e-75	1.94236	18.6467
13	STMN1	1.86421e-35	4.73502	13.2205
13	MKI67	6.53266e-35	4.62932	13.0733
13	TUBB5	3.62605e-33	3.71763	12.7326
13	TOP2A	1.0474e-32	5.06796	12.6269
13	SMC4	1.33438e-28	3.38556	11.8412
13	HMGB2	1.00986e-27	2.91524	11.6547
13	KIF11	3.42327e-26	5.93356	11.3372
13	DIAPH3	1.02257e-24	4.13522	11.0239
13	LGALS1	1.88424e-23	2.51558	10.7477
13	H2AFV	1.28433e-22	3.00642	10.5593
13	SMC2	1.56042e-22	4.2722	10.532
13	HMGB1	2.15894e-22	2.21134	10.4932
13	PCLAF	2.99193e-22	5.52339	10.4548
13	HIST1H2AE	4.99153e-22	4.93121	10.3991
13	HIST1H1E	1.32866e-21	3.54026	10.2987
13	BIRC5	1.86528e-21	5.34547	10.2598
13	RBM3	3.20923e-21	1.85158	10.2014
13	CDCA8	1.24506e-20	4.68547	10.0633
13	PTMA	2.76885e-20	1.62462	9.97896
13	PRC1	3.76299e-20	4.53876	9.94336
13	LY6E	3.82808e-20	2.43959	9.93679
13	ANP32E	1.82017e-19	2.57585	9.77551
13	TMPO	6.3552e-18	3.23996	9.40434
13	PPIA	1.22601e-17	1.46371	9.33048
13	NUSAP1	1.37993e-17	5.34841	9.3136
13	HINT1	2.38683e-17	1.96718	9.25106
13	HIST1H2AP	5.12e-17	5.6394	9.16507
13	UBE2S	7.47468e-17	2.06418	9.12023
13	HIST1H1B	8.85533e-17	5.94924	9.09803
13	INCENP	1.29644e-16	4.11768	9.05283
13	HMGN2	1.39358e-16	3.09028	9.04088
13	RAN	1.39358e-16	2.13002	9.03658
13	CENPP	1.39358e-16	5.10469	9.03125
13	TRBC2	1.5055e-16	2.77933	9.01962
13	CLIC1	1.69634e-16	2.0715	9.00345
13	RORA	3.07139e-16	2.86087	8.93503
13	NUCKS1	3.7667e-16	2.34113	8.90949
13	UBE2C	4.07769e-16	5.28529	8.8978
13	BRCA1	5.08994e-16	5.06522	8.87033
13	TPX2	6.58726e-16	4.85983	8.83881
13	ICOS	6.96845e-16	2.96287	8.82983
13	RAC2	7.45956e-16	2.47205	8.81958
13	KIF23	1.34169e-15	3.60294	8.75101
13	DEK	2.10732e-15	2.27647	8.69737
13	ETS1	3.07029e-15	2.40044	8.65204
13	CENPF	5.35927e-15	5.51992	8.58578
13	GAPDH	6.41782e-15	1.63711	8.56067
13	AW112010	6.41782e-15	3.27006	8.56023
13	ULBP1	6.67309e-15	4.2858	8.5534
13	TAGLN2	1.0465e-14	2.05674	8.49904
14	GM2682	0.0176602	7.6287	4.81071
14	TXK	0.0176602	6.23096	4.77677
14	AW112010	0.0176602	6.12108	4.76402
14	EPSTI1	0.0742981	4.24525	4.36042
14	H2-Q7	0.0742981	3.89656	4.355
14	KLRA8	0.0757906	14.0586	4.2837
14	GZMA	0.0757906	11.0291	4.27629
14	MGAT5	0.0786554	4.03505	4.23813
14	GIMAP4	0.0809387	6.65168	4.20092
14	PTPRC	0.0809387	2.6664	4.18125
14	GIMAP6	0.087031	5.75954	4.13289
14	MS4A4B	0.087031	5.95622	4.12293
14	SATB1	0.10384	3.85962	4.04916
14	PITPNC1	0.10384	3.40761	4.0333
14	KCNQ5	0.10384	4.39276	4.02016
14	ITGA4	0.10384	4.75283	4.01474
14	KLRK1	0.119642	3.41869	3.95188
14	ARSB	0.119642	4.56182	3.94065
14	UMAD1	0.119642	4.21945	3.94017
14	PRKCA	0.130603	3.55169	3.90671
14	UTRN	0.131973	3.11867	3.89237
14	SH2D2A	0.139256	4.35456	3.86799
14	GSAP	0.15085	4.04556	3.83437
14	CCR5	0.15085	4.03224	3.82322
14	DOCK2	0.15085	3.15551	3.817
14	RUNX1	0.15525	3.09052	3.80019
14	USP48	0.172931	3.65212	3.75486
14	1700025G04RIK	0.200788	3.61435	3.70746
14	TNIK	0.200788	3.8189	3.69981
14	CBLB	0.216797	2.98189	3.67192
14	CAR2	0.228136	8.22234	3.65073
14	UGCG	0.233977	3.52607	3.63631
14	FYB	0.250993	2.92005	3.59178
14	SFSWAP	0.250993	3.26318	3.58907
14	ZNRF3	0.250993	3.54493	3.58445
14	GIMAP8	0.250993	6.13253	3.57951
14	SETBP1	0.250993	5.97258	3.56533
14	PPP1R16B	0.250993	2.90062	3.5619
14	ARHGAP15	0.250993	3.03754	3.55441
14	H2-K1	0.250993	2.09524	3.55417
14	EIF4G3	0.250993	3.08106	3.55218
14	PTPN22	0.250993	2.99076	3.54908
14	RIOK1	0.253121	2.54908	3.54079
14	MAP3K1	0.253393	2.89633	3.53338
14	ATP8B4	0.253393	2.96295	3.52876
14	HIP1R	0.264309	3.1841	3.51187
14	ELF4	0.273369	2.51021	3.49729
14	IRF8	0.30288	5.11876	3.46431
14	KLRC2	0.314527	4.7174	3.44869
14	CCL5	0.322101	5.53259	3.4369
15	STMN1	1.48261e-22	5.09409	10.7601
15	TOP2A	3.25536e-22	5.50034	10.6229
15	TRDC	1.1745e-20	4.85802	10.2438
15	HMGB1	4.60643e-18	2.56537	9.58865
15	HIST1H2AE	4.60643e-18	5.44891	9.58203
15	CD3G	4.60643e-18	4.0515	9.57794
15	H2AFV	9.00207e-18	3.55702	9.49243
15	MKI67	1.46177e-17	4.20589	9.42778
15	HMGB2	2.23434e-17	3.03536	9.37074
15	NKG7	7.68004e-17	3.78539	9.22825
15	TUBB5	3.77339e-16	3.12191	9.04572
15	CD3E	4.00334e-16	3.48212	9.02974
15	PTMA	4.94346e-16	1.94162	8.99784
15	IL12RB2	5.20332e-16	3.98347	8.98407
15	PRKACB	8.83399e-16	3.09798	8.91803
15	CARMIL1	1.18572e-15	3.33758	8.87819
15	SMC2	1.5882e-15	4.50895	8.83885
15	TPX2	1.74985e-15	5.84646	8.82162
15	CNTN1	7.32642e-15	3.59912	8.65369
15	CD247	9.05916e-15	3.25095	8.62357
15	PCLAF	1.02614e-14	4.99411	8.6037
15	SMC4	1.09678e-14	3.04789	8.59072
15	AGAP1	1.2857e-14	3.31021	8.56732
15	HIST1H1E	1.78096e-14	3.54421	8.52478
15	NCAPD3	1.88283e-14	3.48468	8.51361
15	UBE2S	2.21289e-14	2.47612	8.49031
15	CD7	2.45449e-14	3.40391	8.47387
15	CTNND2	4.45218e-14	3.07978	8.39999
15	PRDX4	1.05435e-13	3.39023	8.29398
15	CENPP	1.42073e-13	5.69663	8.25065
15	FERMT2	1.42073e-13	3.27062	8.25048
15	RACGAP1	1.72397e-13	5.27602	8.22353
15	MYO1E	4.6816e-13	2.93086	8.09916
15	ATAD2	4.84762e-13	2.99555	8.09129
15	TRDV4	5.92458e-13	3.63758	8.06328
15	SMC1A	8.62833e-13	2.61411	8.01375
15	PRKCH	1.03e-12	3.17606	7.98858
15	TRAT1	1.07617e-12	3.10437	7.97988
15	ATP1B1	1.13777e-12	3.41201	7.96979
15	CTSW	2.08891e-12	3.41456	7.8912
15	DUT	2.12757e-12	3.92165	7.88583
15	ANP32E	2.19638e-12	2.8373	7.87884
15	RIPOR2	2.28418e-12	3.18069	7.871
15	HJURP	2.55692e-12	3.5305	7.854
15	USP36	2.92514e-12	3.0745	7.83429
15	CD3D	2.94527e-12	2.93874	7.83067
15	KNL1	3.28112e-12	5.60727	7.81271
15	DIAPH3	3.28112e-12	3.98744	7.81172
15	AVIL	3.34445e-12	3.36625	7.80671
15	CENPA	6.00012e-12	2.65299	7.72769
16	PRKCH	0	5.17375	52.8758
16	IL12RB2	0	6.40557	52.4553
16	TRDC	0	6.14645	51.8845
16	MYO1E	0	4.08955	50.7767
16	FERMT2	0	6.39073	49.7575
16	CD3G	0	4.81471	49.5832
16	CTLA2A	0	5.08829	49.337
16	CD3E	0	4.98777	49.1271
16	CD7	0	5.8551	48.4525
16	KCNMA1	0	6.61394	48.1739
16	TRAT1	0	5.02039	45.3096
16	AGAP1	0	4.29704	44.5611
16	CARMIL1	0	4.87725	44.423
16	ZEB1	0	3.6593	43.9046
16	NKG7	0	5.15219	43.5291
16	IL2RB	0	3.75765	43.1523
16	FOXO1	0	3.66159	42.9674
16	SLC24A3	0	4.9186	42.7469
16	PRKACB	0	4.16362	42.6389
16	PITPNM2	0	5.96705	42.4419
16	ABR	0	3.60495	42.3862
16	FLNB	0	3.78064	42.056
16	CLASP2	0	3.91923	42.049
16	RGS1	0	3.19678	41.8808
16	GRAP2	0	3.73014	41.8334
16	CTNND2	0	4.40887	41.7324
16	SYTL3	0	3.63172	41.1666
16	ITK	0	3.55971	40.9979
16	GEM	0	3.50708	40.6557
16	COL27A1	0	5.60506	40.599
16	CD3D	0	3.80618	40.4401
16	ADGRL2	0	4.26766	40.0917
16	SLC16A10	0	4.26394	39.7513
16	RAPGEF2	0	2.87212	39.6034
16	DENND4A	0	2.4684	39.1958
16	RHOQ	0	3.6325	38.9348
16	USP36	0	4.35244	38.8695
16	JMY	0	3.32929	38.8646
16	GSDME	0	4.42209	38.6884
16	RGS2	0	2.79413	38.6102
16	TOX	0	3.72908	38.5982
16	ZC3H13	0	2.99325	38.282
16	VGLL4	0	3.03323	38.2481
16	CD247	0	3.66671	38.2387
16	AREG	0	3.97604	37.9677
16	ZMAT4	0	5.34803	37.9533
16	ANKRD11	0	2.15593	37.8721
16	TNFRSF9	0	3.51088	37.7066
16	PTK2B	1.06073e-306	2.98874	37.6028
16	CNTN1	2.01881e-306	5.91432	37.5851
17	DCN	2.94571e-44	9.60274	14.6666
17	SPARC	6.04933e-39	7.30342	13.7617
17	GSN	1.50008e-36	4.52759	13.327
17	COL1A2	2.65682e-35	8.08893	13.089
17	BGN	1.1693e-32	8.57769	12.6006
17	TIMP2	2.16697e-27	4.51171	11.5895
17	APOD	2.87421e-27	7.53096	11.5521
17	COL1A1	2.40869e-26	7.61186	11.3563
17	BICC1	4.1739e-26	8.8769	11.2978
17	COL6A1	7.35401e-26	7.6382	11.2386
17	COL3A1	1.72528e-25	7.39316	11.1546
17	ID3	2.2592e-25	4.02732	11.1229
17	COL6A3	3.70902e-25	7.98592	11.0714
17	PLPP3	5.85664e-25	5.09191	11.0237
17	EBF1	8.17606e-25	7.00837	10.9874
17	PRRX1	1.57959e-24	8.70568	10.922
17	TCF4	3.61775e-24	3.33792	10.8409
17	COL5A2	2.0704e-23	7.45111	10.6748
17	LAMA2	1.29516e-22	7.7247	10.4981
17	FN1	3.40141e-22	3.89261	10.4017
17	PAM	5.98989e-22	4.02238	10.3397
17	PBX1	5.98989e-22	3.27756	10.3385
17	LUM	6.85112e-22	8.1592	10.3213
17	NFIA	1.81325e-21	3.56382	10.2233
17	RNASE4	2.58996e-21	4.62584	10.1848
17	ABI3BP	2.87247e-21	4.71374	10.1709
17	FSTL1	5.19628e-21	7.54353	10.1093
17	SLIT3	9.33515e-21	6.97443	10.0481
17	LRP1	5.83892e-20	2.94618	9.86229
17	CPED1	9.4179e-20	5.21446	9.81076
17	IGFBP7	1.29738e-19	6.14278	9.77507
17	MEIS2	1.36383e-19	5.30636	9.76679
17	SERPING1	1.42414e-19	7.87158	9.75928
17	CD63	1.93074e-19	2.72742	9.72533
17	FGFR1	1.95078e-19	3.55409	9.72133
17	KLF9	5.48123e-19	3.8599	9.61269
17	NFIX	6.62598e-19	3.67352	9.59032
17	CAVIN1	1.51659e-18	4.95486	9.50173
17	CCDC80	1.73999e-18	6.58288	9.48471
17	AEBP1	3.65931e-17	7.16316	9.1589
17	RBMS3	5.65822e-17	3.63062	9.10906
17	GHR	5.97753e-17	4.92372	9.10049
17	TIMP3	8.1794e-17	5.75731	9.0638
17	CD81	2.63278e-16	3.04483	8.93291
17	ZBTB20	3.15768e-16	2.23397	8.91029
17	RBFOX2	3.25244e-16	3.70564	8.90458
17	GPM6B	4.00108e-16	4.62517	8.87918
17	SELENOM	4.15938e-16	5.13757	8.87251
17	MMP2	4.2486e-16	6.55688	8.86595
17	LHFP	4.2486e-16	5.96462	8.8656
18	LGALS7	0	10.2829	40.6239
18	PERP	0	9.15382	40.0634
18	SFN	0	7.89353	39.716
18	DSP	0	8.43528	39.511
18	DSC3	0	8.50165	39.2043
18	FXYD3	0	8.41716	38.638
18	LY6D	0	9.42927	38.029
18	KRT14	8.54367e-305	9.31946	37.5353
18	S100A14	9.5622e-289	8.42243	36.535
18	ANXA8	6.01098e-285	8.63103	36.2921
18	APOE	1.32797e-281	4.95456	36.0769
18	COL17A1	1.24422e-280	8.14793	36.0124
18	MCC	1.14751e-278	7.15545	35.8844
18	CDH1	2.70694e-277	5.02046	35.7942
18	KLF5	3.82842e-275	6.74519	35.6538
18	TRIM29	1.17715e-274	8.09527	35.6205
18	DMKN	1.95858e-267	6.92555	35.1493
18	CLCA3A2	1.31961e-260	8.65737	34.6978
18	KRT5	7.31246e-259	9.02969	34.5804
18	SERPINB5	1.10411e-257	8.15833	34.5004
18	CXADR	2.41601e-250	6.21518	34.006
18	EFNA5	1.78787e-248	5.39868	33.8779
18	NFIX	2.84382e-247	5.2306	33.7949
18	JUP	3.13776e-247	4.50956	33.7907
18	FCGBP	5.31993e-244	8.35329	33.569
18	NFIB	6.23728e-239	6.41833	33.2186
18	RPLP0	5.75429e-236	2.45338	33.0114
18	TACSTD2	3.03412e-233	5.25388	32.8201
18	RPL5	2.55507e-231	2.07718	32.6838
18	PKP1	9.06808e-230	7.3461	32.5735
18	ID3	7.38129e-229	4.62809	32.5081
18	DSG3	1.52493e-228	7.58239	32.4848
18	APOC1	4.2756e-227	8.11103	32.3812
18	PPP1R14C	5.128e-226	5.82996	32.3035
18	FAM25C	2.0322e-224	8.82024	32.1886
18	RPL10A	9.10117e-223	2.32837	32.0695
18	EGFR	6.81921e-221	5.6372	31.9339
18	TACC2	1.53897e-220	5.12166	31.9076
18	RPL13	1.68248e-219	1.82255	31.8318
18	ITGA6	3.40113e-218	5.12354	31.7365
18	HMGN1	1.10642e-217	3.29908	31.6986
18	URAH	9.99375e-217	7.8246	31.6284
18	ESRP1	7.8804e-215	8.20754	31.4894
18	TMEM45A	2.05695e-214	7.46176	31.4582
18	S100A16	5.40654e-214	6.92309	31.4268
18	DENND2C	4.9712e-212	6.74437	31.282
18	DSTN	9.48691e-212	3.12491	31.2607
18	ATF3	8.84584e-211	3.7344	31.1886
18	CKMT1	2.51384e-210	8.83648	31.1545
18	RPL4	6.11766e-205	2.0497	30.7536
Cluster	Gene	P_adj	Log2FC	Scores
Cluster	Gene	P_adj	Log2FC	Scores
Cluster	Gene	P_adj	Log2FC	Scores
Cluster	Gene	P_adj	Log2FC	Scores
Cluster	Gene	P_adj	Log2FC	Scores
Cluster	Gene	P_adj	Log2FC	Scores
Cluster	Gene	P_adj	Log2FC	Scores
Cluster	Gene	P_adj	Log2FC	Scores
Cluster	Gene	P_adj	Log2FC	Scores
Cluster	Gene	P_adj	Log2FC	Scores
Cluster	Gene	P_adj	Log2FC	Scores
Cluster	Gene	P_adj	Log2FC	Scores
Cluster	Gene	P_adj	Log2FC	Scores
Cluster	Gene	P_adj	Log2FC	Scores
Cluster	Gene	P_adj	Log2FC	Scores
Cluster	Gene	P_adj	Log2FC	Scores
Cluster	Gene	P_adj	Log2FC	Scores
