# Supplementary material for: Loss of epidermal microRNA-149 sensitizes to skin inflammation
Source: Research Square preprint supplement (doi:10.21203/rs.3.rs-6047392/v1), 2025-07-29
Supplement: Supplementary file 4 [file 581e43476078971df9f69f66.xlsx]

## Sheet: Exprimental validated targets
TarBase	Ensembl	Description	Methods
COPG1	ENSG00000181789	coatomer protein complex subunit gamma 1	HITS-CLIP
TXNIP	ENSG00000265972	thioredoxin interacting protein	HITS-CLIP
ARFGEF2	ENSG00000124198	ADP ribosylation factor guanine nucleotide exchange factor 2	HITS-CLIP
KPNA4	ENSG00000186432	karyopherin subunit alpha 4	HITS-CLIP
TBC1D15	ENSG00000121749	TBC1 domain family member 15	HITS-CLIP
PSME2	ENSG00000100911	proteasome activator subunit 2	HITS-CLIP
SLC9A3R1	ENSG00000109062	SLC9A3 regulator 1	HITS-CLIP
FGF14	ENSG00000102466	fibroblast growth factor 14	HITS-CLIP
ZBTB5	ENSG00000168795	zinc finger and BTB domain containing 5	HITS-CLIP
SAMD1	ENSG00000141858	sterile alpha motif domain containing 1	HITS-CLIP
SLC35B4	ENSG00000205060	solute carrier family 35 member B4	HITS-CLIP
KCTD15	ENSG00000153885	potassium channel tetramerization domain containing 15	HITS-CLIP
OSER1	ENSG00000132823	oxidative stress responsive serine rich 1	HITS-CLIP
BTG2	ENSG00000159388	BTG anti-proliferation factor 2	HITS-CLIP
PTPRK	ENSG00000152894	protein tyrosine phosphatase, receptor type K	HITS-CLIP
SYT16	ENSG00000139973	synaptotagmin 16	HITS-CLIP
FLNA	ENSG00000196924	filamin A	HITS-CLIP
METRNL	ENSG00000176845	meteorin like, glial cell differentiation regulator	HITS-CLIP
FNIP1	ENSG00000217128	folliculin interacting protein 1	HITS-CLIP
ERCC6	ENSG00000225830	ERCC excision repair 6, chromatin remodeling factor	HITS-CLIP
MED1	ENSG00000125686	mediator complex subunit 1	HITS-CLIP
FAM222B	ENSG00000173065	family with sequence similarity 222 member B	HITS-CLIP
PRDM2	ENSG00000116731	PR/SET domain 2	HITS-CLIP
VPS26A	ENSG00000122958	VPS26, retromer complex component A	HITS-CLIP
MROH7	ENSG00000184313	maestro heat like repeat family member 7	HITS-CLIP
SATB1	ENSG00000182568	SATB homeobox 1	HITS-CLIP
CELF1	ENSG00000149187	CUGBP Elav-like family member 1	HITS-CLIP
SUB1	ENSG00000113387	SUB1 homolog, transcriptional regulator	HITS-CLIP
SRRM2	ENSG00000167978	serine/arginine repetitive matrix 2	HITS-CLIP
TLN1	ENSG00000137076	talin 1	HITS-CLIP
IL13RA1	ENSG00000131724	interleukin 13 receptor subunit alpha 1	HITS-CLIP
TRAM2	ENSG00000065308	translocation associated membrane protein 2	HITS-CLIP
CEP170B	ENSG00000099814	centrosomal protein 170B	HITS-CLIP
PRRC2B	ENSG00000130723	proline rich coiled-coil 2B	HITS-CLIP
ARHGEF12	ENSG00000196914	Rho guanine nucleotide exchange factor 12	HITS-CLIP
SRSF5	ENSG00000100650	serine and arginine rich splicing factor 5	HITS-CLIP
CAPN15	ENSG00000103326	calpain 15	HITS-CLIP
MLLT6	ENSG00000275023	MLLT6, PHD finger containing	HITS-CLIP
GHITM	ENSG00000165678	growth hormone inducible transmembrane protein	HITS-CLIP
HEXIM1	ENSG00000186834	hexamethylene bisacetamide inducible 1	HITS-CLIP
KMT2B	ENSG00000272333	lysine methyltransferase 2B	HITS-CLIP
EIF4G1	ENSG00000114867	eukaryotic translation initiation factor 4 gamma 1	HITS-CLIP
NECTIN4	ENSG00000143217	nectin cell adhesion molecule 4	HITS-CLIP
AMER2	ENSG00000165566	APC membrane recruitment protein 2	HITS-CLIP
TMEM64	ENSG00000180694	transmembrane protein 64	HITS-CLIP
ARHGEF4	ENSG00000136002	Rho guanine nucleotide exchange factor 4	HITS-CLIP
ETS2	ENSG00000157557	ETS proto-oncogene 2, transcription factor	HITS-CLIP
HNRNPDL	ENSG00000152795	heterogeneous nuclear ribonucleoprotein D like	HITS-CLIP
PCM1	ENSG00000078674	pericentriolar material 1	HITS-CLIP
ZNF385A	ENSG00000161642	zinc finger protein 385A	HITS-CLIP
TOB2	ENSG00000183864	transducer of ERBB2, 2	HITS-CLIP
CDK19	ENSG00000155111	cyclin dependent kinase 19	HITS-CLIP
FDXR	ENSG00000161513	ferredoxin reductase	HITS-CLIP
FOSL1	ENSG00000175592	FOS like 1, AP-1 transcription factor subunit	Luciferase Reporter Assay
REEP3	ENSG00000165476	receptor accessory protein 3	HITS-CLIP
CBX5	ENSG00000094916	chromobox 5	HITS-CLIP
PAF1	ENSG00000006712	PAF1 homolog, Paf1/RNA polymerase II complex component	HITS-CLIP
LRP1	ENSG00000123384	LDL receptor related protein 1	HITS-CLIP
TMEM184B	ENSG00000198792	transmembrane protein 184B	HITS-CLIP
MIEF1	ENSG00000100335	mitochondrial elongation factor 1	HITS-CLIP
VPS53	ENSG00000141252	VPS53, GARP complex subunit	HITS-CLIP
EIF4G3	ENSG00000075151	eukaryotic translation initiation factor 4 gamma 3	HITS-CLIP
SLC8A1	ENSG00000183023	solute carrier family 8 member A1	HITS-CLIP
CLASP1	ENSG00000074054	cytoplasmic linker associated protein 1	HITS-CLIP
RUSC2	ENSG00000198853	RUN and SH3 domain containing 2	HITS-CLIP
RAB3C	ENSG00000152932	RAB3C, member RAS oncogene family	HITS-CLIP
WDR43	ENSG00000163811	WD repeat domain 43	HITS-CLIP
ZNF652	ENSG00000198740	zinc finger protein 652	HITS-CLIP
AHNAK	ENSG00000124942	AHNAK nucleoprotein	HITS-CLIP
SLC7A8	ENSG00000092068	solute carrier family 7 member 8	HITS-CLIP
CNTNAP1	ENSG00000108797	contactin associated protein 1	HITS-CLIP
SLC19A2	ENSG00000117479	solute carrier family 19 member 2	HITS-CLIP
RNF216	ENSG00000011275	ring finger protein 216	HITS-CLIP
KLC1	ENSG00000126214	kinesin light chain 1	HITS-CLIP
ZBTB48	ENSG00000204859	zinc finger and BTB domain containing 48	HITS-CLIP
JMJD1C	ENSG00000171988	jumonji domain containing 1C	HITS-CLIP
GABBR1	ENSG00000204681	gamma-aminobutyric acid type B receptor subunit 1	HITS-CLIP
CHGB	ENSG00000089199	chromogranin B	HITS-CLIP
NPTX1	ENSG00000171246	neuronal pentraxin 1	HITS-CLIP
KIF23	ENSG00000137807	kinesin family member 23	HITS-CLIP
TXNL1	ENSG00000091164	thioredoxin like 1	HITS-CLIP
TRAK2	ENSG00000115993	trafficking kinesin protein 2	HITS-CLIP
TMEM97	ENSG00000109084	transmembrane protein 97	HITS-CLIP
HYOU1	ENSG00000149428	hypoxia up-regulated 1	HITS-CLIP
ATAD2	ENSG00000156802	ATPase family, AAA domain containing 2	HITS-CLIP
EIF3C	ENSG00000184110	eukaryotic translation initiation factor 3 subunit C	CLASH
KLF3	ENSG00000109787	Kruppel like factor 3	HITS-CLIP
CCM2	ENSG00000136280	CCM2 scaffold protein	HITS-CLIP
SREBF2	ENSG00000198911	sterol regulatory element binding transcription factor 2	HITS-CLIP
TBRG4	ENSG00000136270	transforming growth factor beta regulator 4	HITS-CLIP
NFATC1	ENSG00000131196	nuclear factor of activated T cells 1	HITS-CLIP
HSPA9	ENSG00000113013	heat shock protein family A (Hsp70) member 9	HITS-CLIP
FUS	ENSG00000089280	FUS RNA binding protein	HITS-CLIP
TNFRSF12A	ENSG00000006327	TNF receptor superfamily member 12A	HITS-CLIP
PTPN12	ENSG00000127947	protein tyrosine phosphatase, non-receptor type 12	HITS-CLIP
MTCH1	ENSG00000137409	mitochondrial carrier 1	HITS-CLIP
CEPT1	ENSG00000134255	choline/ethanolamine phosphotransferase 1	HITS-CLIP
TNRC6B	ENSG00000100354	trinucleotide repeat containing 6B	HITS-CLIP
WASF2	ENSG00000158195	WAS protein family member 2	HITS-CLIP
IGFBP5	ENSG00000115461	insulin like growth factor binding protein 5	HITS-CLIP
GREB1	ENSG00000196208	growth regulating estrogen receptor binding 1	HITS-CLIP
CLTC	ENSG00000141367	clathrin heavy chain	HITS-CLIP
MCAT	ENSG00000100294	malonyl-CoA-acyl carrier protein transacylase	HITS-CLIP
MXD1	ENSG00000059728	MAX dimerization protein 1	HITS-CLIP
CASP2	ENSG00000106144	caspase 2	HITS-CLIP
JPH2	ENSG00000149596	junctophilin 2	HITS-CLIP
BIRC6	ENSG00000115760	baculoviral IAP repeat containing 6	HITS-CLIP
POLG	ENSG00000140521	DNA polymerase gamma, catalytic subunit	HITS-CLIP
DMPK	ENSG00000104936	DM1 protein kinase	HITS-CLIP
TSHZ1	ENSG00000179981	teashirt zinc finger homeobox 1	HITS-CLIP
TCF7	ENSG00000081059	transcription factor 7	HITS-CLIP
SRSF6	ENSG00000124193	serine and arginine rich splicing factor 6	HITS-CLIP
ASIC1	ENSG00000110881	acid sensing ion channel subunit 1	HITS-CLIP
PPDPF	ENSG00000125534	pancreatic progenitor cell differentiation and proliferation factor	HITS-CLIP
SYT2	ENSG00000143858	synaptotagmin 2	HITS-CLIP
NF1	ENSG00000196712	neurofibromin 1	HITS-CLIP
RGMB	ENSG00000174136	repulsive guidance molecule BMP co-receptor b	HITS-CLIP
FBXO5	ENSG00000112029	F-box protein 5	HITS-CLIP
MTMR4	ENSG00000108389	myotubularin related protein 4	HITS-CLIP
RASSF3	ENSG00000153179	Ras association domain family member 3	HITS-CLIP
CCT3	ENSG00000163468	chaperonin containing TCP1 subunit 3	HITS-CLIP
C14orf132	ENSG00000227051	chromosome 14 open reading frame 132	HITS-CLIP
RTN4	ENSG00000115310	reticulon 4	HITS-CLIP
EIF4EBP1	ENSG00000187840	eukaryotic translation initiation factor 4E binding protein 1	HITS-CLIP
TCEAL2	ENSG00000184905	transcription elongation factor A like 2	HITS-CLIP
NCR3LG1	ENSG00000188211	natural killer cell cytotoxicity receptor 3 ligand 1	HITS-CLIP
ERGIC3	ENSG00000125991	ERGIC and golgi 3	HITS-CLIP
TACC1	ENSG00000147526	transforming acidic coiled-coil containing protein 1	HITS-CLIP
REV3L	ENSG00000009413	REV3 like, DNA directed polymerase zeta catalytic subunit	HITS-CLIP
SPAG9	ENSG00000008294	sperm associated antigen 9	HITS-CLIP
NPDC1	ENSG00000107281	neural proliferation, differentiation and control 1	HITS-CLIP
BTG3	ENSG00000154640	BTG anti-proliferation factor 3	HITS-CLIP
GPR137	ENSG00000173264	G protein-coupled receptor 137	HITS-CLIP
EHD2	ENSG00000024422	EH domain containing 2	HITS-CLIP
RPLP0	ENSG00000089157	ribosomal protein lateral stalk subunit P0	CLASH
RPLP2	ENSG00000177600	ribosomal protein lateral stalk subunit P2	HITS-CLIP
APPL2	ENSG00000136044	adaptor protein, phosphotyrosine interacting with PH domain and leucine zipper 2	HITS-CLIP
CACNG4	ENSG00000075461	calcium voltage-gated channel auxiliary subunit gamma 4	HITS-CLIP
CHD8	ENSG00000100888	chromodomain helicase DNA binding protein 8	HITS-CLIP
TCEAL9	ENSG00000185222	transcription elongation factor A like 9	HITS-CLIP
EP400	ENSG00000183495	E1A binding protein p400	HITS-CLIP
ST6GALNAC6	ENSG00000160408	ST6 N-acetylgalactosaminide alpha-2,6-sialyltransferase 6	HITS-CLIP
C6orf136	ENSG00000204564	chromosome 6 open reading frame 136	HITS-CLIP
ZNF346	ENSG00000113761	zinc finger protein 346	CLASH
FBXL4	ENSG00000112234	F-box and leucine rich repeat protein 4	HITS-CLIP
MAVS	ENSG00000088888	mitochondrial antiviral signaling protein	HITS-CLIP
FAHD1	ENSG00000180185	fumarylacetoacetate hydrolase domain containing 1	HITS-CLIP
CABLES2	ENSG00000149679	Cdk5 and Abl enzyme substrate 2	HITS-CLIP
CHD1	ENSG00000153922	chromodomain helicase DNA binding protein 1	HITS-CLIP
RBBP4	ENSG00000162521	RB binding protein 4, chromatin remodeling factor	HITS-CLIP
SNRPF	ENSG00000139343	small nuclear ribonucleoprotein polypeptide F	HITS-CLIP
ZNF611	ENSG00000213020	zinc finger protein 611	HITS-CLIP
AP1G1	ENSG00000166747	adaptor related protein complex 1 subunit gamma 1	HITS-CLIP
RHOB	ENSG00000143878	ras homolog family member B	HITS-CLIP
TXLNA	ENSG00000084652	taxilin alpha	HITS-CLIP
ZFAND5	ENSG00000107372	zinc finger AN1-type containing 5	HITS-CLIP
UBE2K	ENSG00000078140	ubiquitin conjugating enzyme E2 K	HITS-CLIP
DLGAP4	ENSG00000080845	DLG associated protein 4	HITS-CLIP
PSMD8	ENSG00000099341	proteasome 26S subunit, non-ATPase 8	CLASH
INPPL1	ENSG00000165458	inositol polyphosphate phosphatase like 1	HITS-CLIP
ADCY1	ENSG00000164742	adenylate cyclase 1	HITS-CLIP
PABPN1	ENSG00000100836	poly(A) binding protein nuclear 1	HITS-CLIP
NUMA1	ENSG00000137497	nuclear mitotic apparatus protein 1	HITS-CLIP
SOCS1	ENSG00000185338	suppressor of cytokine signaling 1	HITS-CLIP
BOD1L1	ENSG00000038219	biorientation of chromosomes in cell division 1 like 1	HITS-CLIP
VAMP2	ENSG00000220205	vesicle associated membrane protein 2	HITS-CLIP
DHX40	ENSG00000108406	DEAH-box helicase 40	HITS-CLIP
TBL1X	ENSG00000101849	transducin beta like 1 X-linked	HITS-CLIP
ESYT2	ENSG00000117868	extended synaptotagmin 2	HITS-CLIP
SEZ6L2	ENSG00000174938	seizure related 6 homolog like 2	HITS-CLIP
LMNB2	ENSG00000176619	lamin B2	HITS-CLIP
USP34	ENSG00000115464	ubiquitin specific peptidase 34	HITS-CLIP
CACNA1E	ENSG00000198216	calcium voltage-gated channel subunit alpha1 E	HITS-CLIP
EMC10	ENSG00000161671	ER membrane protein complex subunit 10	HITS-CLIP
ILF2	ENSG00000143621	interleukin enhancer binding factor 2	CLASH
ELK4	ENSG00000158711	ELK4, ETS transcription factor	HITS-CLIP
SDAD1	ENSG00000198301	SDA1 domain containing 1	HITS-CLIP
FAM221B	ENSG00000204930	family with sequence similarity 221 member B	HITS-CLIP
SRSF7	ENSG00000115875	serine and arginine rich splicing factor 7	HITS-CLIP
AMOTL2	ENSG00000114019	angiomotin like 2	HITS-CLIP
DYNLL2	ENSG00000264364	dynein light chain LC8-type 2	HITS-CLIP
MAT2B	ENSG00000038274	methionine adenosyltransferase 2B	HITS-CLIP
MAPK14	ENSG00000112062	mitogen-activated protein kinase 14	HITS-CLIP
PPP4R3B	ENSG00000275052	protein phosphatase 4 regulatory subunit 3B	HITS-CLIP
RBM14	ENSG00000239306	RNA binding motif protein 14	HITS-CLIP
RNF138	ENSG00000134758	ring finger protein 138	HITS-CLIP
ANKRD11	ENSG00000167522	ankyrin repeat domain 11	CLASH
TJP2	ENSG00000119139	tight junction protein 2	HITS-CLIP
PTPA	ENSG00000119383	protein phosphatase 2 phosphatase activator	HITS-CLIP
TRIM11	ENSG00000154370	tripartite motif containing 11	HITS-CLIP
POFUT1	ENSG00000101346	protein O-fucosyltransferase 1	HITS-CLIP
SERF2	ENSG00000140264	small EDRK-rich factor 2	HITS-CLIP
RPL13A	ENSG00000142541	ribosomal protein L13a	HITS-CLIP
KIF5C	ENSG00000168280	kinesin family member 5C	HITS-CLIP
ZNF281	ENSG00000162702	zinc finger protein 281	HITS-CLIP
KANSL1	ENSG00000120071	KAT8 regulatory NSL complex subunit 1	HITS-CLIP
KCTD12	ENSG00000178695	potassium channel tetramerization domain containing 12	HITS-CLIP
SEC16A	ENSG00000148396	SEC16 homolog A, endoplasmic reticulum export factor	HITS-CLIP
DOCK4	ENSG00000128512	dedicator of cytokinesis 4	HITS-CLIP
CCDC186	ENSG00000165813	coiled-coil domain containing 186	HITS-CLIP
FOXC1	ENSG00000054598	forkhead box C1	HITS-CLIP
FOXN2	ENSG00000170802	forkhead box N2	HITS-CLIP
CENPB	ENSG00000125817	centromere protein B	CLASH
ITPRIPL2	ENSG00000205730	ITPRIP like 2	HITS-CLIP
CNOT11	ENSG00000158435	CCR4-NOT transcription complex subunit 11	CLASH
EYA4	ENSG00000112319	EYA transcriptional coactivator and phosphatase 4	HITS-CLIP
CNN3	ENSG00000117519	calponin 3	HITS-CLIP
TBL1XR1	ENSG00000177565	transducin beta like 1 X-linked receptor 1	HITS-CLIP
KMT2D	ENSG00000167548	lysine methyltransferase 2D	HITS-CLIP
SRSF4	ENSG00000116350	serine and arginine rich splicing factor 4	HITS-CLIP
VCP	ENSG00000165280	valosin containing protein	HITS-CLIP
GNL2	ENSG00000134697	G protein nucleolar 2	HITS-CLIP
FAM160A2	ENSG00000051009	family with sequence similarity 160 member A2	HITS-CLIP
C6orf89	ENSG00000198663	chromosome 6 open reading frame 89	HITS-CLIP
ZKSCAN1	ENSG00000106261	zinc finger with KRAB and SCAN domains 1	HITS-CLIP
TEX2	ENSG00000136478	testis expressed 2	HITS-CLIP
LRP6	ENSG00000070018	LDL receptor related protein 6	HITS-CLIP
LRRK2	ENSG00000188906	leucine rich repeat kinase 2	HITS-CLIP
ERBIN	ENSG00000112851	erbb2 interacting protein	HITS-CLIP
EEF2	ENSG00000167658	eukaryotic translation elongation factor 2	HITS-CLIP
CUL1	ENSG00000055130	cullin 1	HITS-CLIP
NUP107	ENSG00000111581	nucleoporin 107	HITS-CLIP
PLEKHG2	ENSG00000090924	pleckstrin homology and RhoGEF domain containing G2	HITS-CLIP
OXSR1	ENSG00000172939	oxidative stress responsive 1	HITS-CLIP
PROM2	ENSG00000155066	prominin 2	HITS-CLIP
PNN	ENSG00000100941	pinin, desmosome associated protein	HITS-CLIP
GRIN2B	ENSG00000273079	glutamate ionotropic receptor NMDA type subunit 2B	HITS-CLIP
ACIN1	ENSG00000100813	apoptotic chromatin condensation inducer 1	HITS-CLIP
AKAP10	ENSG00000108599	A-kinase anchoring protein 10	HITS-CLIP
WNK2	ENSG00000165238	WNK lysine deficient protein kinase 2	HITS-CLIP
CHD2	ENSG00000173575	chromodomain helicase DNA binding protein 2	HITS-CLIP
CAP1	ENSG00000131236	cyclase associated actin cytoskeleton regulatory protein 1	HITS-CLIP
JUN	ENSG00000177606	Jun proto-oncogene, AP-1 transcription factor subunit	HITS-CLIP
H2AFJ	ENSG00000246705	H2A histone family member J	HITS-CLIP
PCLO	ENSG00000186472	piccolo presynaptic cytomatrix protein	HITS-CLIP
DDX27	ENSG00000124228	DEAD-box helicase 27	HITS-CLIP
DDR2	ENSG00000162733	discoidin domain receptor tyrosine kinase 2	HITS-CLIP
CACNB2	ENSG00000165995	calcium voltage-gated channel auxiliary subunit beta 2	HITS-CLIP
TRIP12	ENSG00000153827	thyroid hormone receptor interactor 12	HITS-CLIP
ROCK2	ENSG00000134318	Rho associated coiled-coil containing protein kinase 2	HITS-CLIP
TUBB2B	ENSG00000137285	tubulin beta 2B class IIb	HITS-CLIP
OLFM1	ENSG00000130558	olfactomedin 1	HITS-CLIP
AASDHPPT	ENSG00000149313	aminoadipate-semialdehyde dehydrogenase-phosphopantetheinyl transferase	HITS-CLIP
GARS	ENSG00000106105	glycyl-tRNA synthetase	Chimeric fragments
TCAF1	ENSG00000198420	TRPM8 channel associated factor 1	HITS-CLIP
GRB10	ENSG00000106070	growth factor receptor bound protein 10	HITS-CLIP
unknown	ENSG00000224870		HITS-CLIP
PMM2	ENSG00000140650	phosphomannomutase 2	HITS-CLIP
C19orf25	ENSG00000119559	chromosome 19 open reading frame 25	HITS-CLIP
CCNT1	ENSG00000129315	cyclin T1	HITS-CLIP
PANX1	ENSG00000110218	pannexin 1	HITS-CLIP
NUCKS1	ENSG00000069275	nuclear casein kinase and cyclin dependent kinase substrate 1	HITS-CLIP
TCEAL5	ENSG00000204065	transcription elongation factor A like 5	HITS-CLIP
FOXK1	ENSG00000164916	forkhead box K1	HITS-CLIP
ASPH	ENSG00000198363	aspartate beta-hydroxylase	HITS-CLIP
SLC39A14	ENSG00000104635	solute carrier family 39 member 14	HITS-CLIP
ZNF275	ENSG00000063587	zinc finger protein 275	HITS-CLIP
RPL15	ENSG00000174748	ribosomal protein L15	CLASH
BRD4	ENSG00000141867	bromodomain containing 4	HITS-CLIP
ZNF550	ENSG00000251369	zinc finger protein 550	HITS-CLIP
TOP1	ENSG00000198900	DNA topoisomerase I	HITS-CLIP
DROSHA	ENSG00000113360	drosha ribonuclease III	HITS-CLIP
PSMD2	ENSG00000175166	proteasome 26S subunit, non-ATPase 2	Chimeric fragments, HITS-CLIP
TAOK1	ENSG00000160551	TAO kinase 1	HITS-CLIP
CCND2	ENSG00000118971	cyclin D2	HITS-CLIP
LRFN4	ENSG00000173621	leucine rich repeat and fibronectin type III domain containing 4	HITS-CLIP
SYNE2	ENSG00000054654	spectrin repeat containing nuclear envelope protein 2	HITS-CLIP
RPN2	ENSG00000118705	ribophorin II	HITS-CLIP
IL6	ENSG00000136244	interleukin 6	HITS-CLIP
DUS3L	ENSG00000141994	dihydrouridine synthase 3 like	HITS-CLIP
DUSP6	ENSG00000139318	dual specificity phosphatase 6	HITS-CLIP
BIRC2	ENSG00000110330	baculoviral IAP repeat containing 2	HITS-CLIP
UCP2	ENSG00000175567	uncoupling protein 2	HITS-CLIP
MRPL20	ENSG00000242485	mitochondrial ribosomal protein L20	HITS-CLIP
TUBA1C	ENSG00000167553	tubulin alpha 1c	HITS-CLIP
RPL13	ENSG00000167526	ribosomal protein L13	HITS-CLIP
CTCF	ENSG00000102974	CCCTC-binding factor	HITS-CLIP
CACNA2D1	ENSG00000153956	calcium voltage-gated channel auxiliary subunit alpha2delta 1	HITS-CLIP
PRKDC	ENSG00000253729	protein kinase, DNA-activated, catalytic polypeptide	HITS-CLIP
SLC25A3	ENSG00000075415	solute carrier family 25 member 3	HITS-CLIP
IBA57	ENSG00000181873	IBA57, iron-sulfur cluster assembly	HITS-CLIP
SLC25A36	ENSG00000114120	solute carrier family 25 member 36	HITS-CLIP
EFHD1	ENSG00000115468	EF-hand domain family member D1	HITS-CLIP
GPC1	ENSG00000063660	glypican 1	Luciferase Reporter Assay
TNRC18	ENSG00000182095	trinucleotide repeat containing 18	HITS-CLIP
EIF3A	ENSG00000107581	eukaryotic translation initiation factor 3 subunit A	HITS-CLIP
ARHGAP21	ENSG00000107863	Rho GTPase activating protein 21	HITS-CLIP
PPP1R9B	ENSG00000108819	protein phosphatase 1 regulatory subunit 9B	HITS-CLIP
AUTS2	ENSG00000158321	AUTS2, activator of transcription and developmental regulator	HITS-CLIP
HSPA8	ENSG00000109971	heat shock protein family A (Hsp70) member 8	HITS-CLIP
TP53BP1	ENSG00000067369	tumor protein p53 binding protein 1	HITS-CLIP
SCRIB	ENSG00000180900	scribbled planar cell polarity protein	HITS-CLIP
HOXA10	ENSG00000253293	homeobox A10	HITS-CLIP
JUND	ENSG00000130522	JunD proto-oncogene, AP-1 transcription factor subunit	HITS-CLIP
CSRNP2	ENSG00000110925	cysteine and serine rich nuclear protein 2	HITS-CLIP
ARVCF	ENSG00000099889	ARVCF, delta catenin family member	HITS-CLIP
KLHL29	ENSG00000119771	kelch like family member 29	HITS-CLIP
RAB3D	ENSG00000105514	RAB3D, member RAS oncogene family	HITS-CLIP
DAZAP1	ENSG00000071626	DAZ associated protein 1	HITS-CLIP
SPEN	ENSG00000065526	spen family transcriptional repressor	HITS-CLIP
NFRKB	ENSG00000170322	nuclear factor related to kappaB binding protein	HITS-CLIP
GUCD1	ENSG00000138867	guanylyl cyclase domain containing 1	HITS-CLIP
SMC1A	ENSG00000072501	structural maintenance of chromosomes 1A	CLASH
PTPRA	ENSG00000132670	protein tyrosine phosphatase, receptor type A	HITS-CLIP
GJA1	ENSG00000152661	gap junction protein alpha 1	HITS-CLIP
SCLY	ENSG00000132330	selenocysteine lyase	HITS-CLIP
TMED4	ENSG00000158604	transmembrane p24 trafficking protein 4	HITS-CLIP
MICAL3	ENSG00000243156	microtubule associated monooxygenase, calponin and LIM domain containing 3	HITS-CLIP
ZSWIM9	ENSG00000185453	zinc finger SWIM-type containing 9	HITS-CLIP
CXCL5	ENSG00000163735	C-X-C motif chemokine ligand 5	HITS-CLIP
DYNC1H1	ENSG00000197102	dynein cytoplasmic 1 heavy chain 1	HITS-CLIP
TUBA1B	ENSG00000123416	tubulin alpha 1b	HITS-CLIP
IPO5	ENSG00000065150	importin 5	HITS-CLIP
CHD9	ENSG00000177200	chromodomain helicase DNA binding protein 9	HITS-CLIP
CDT1	ENSG00000167513	chromatin licensing and DNA replication factor 1	HITS-CLIP
PHF12	ENSG00000109118	PHD finger protein 12	HITS-CLIP
C14orf119	ENSG00000179933	chromosome 14 open reading frame 119	HITS-CLIP
MIA3	ENSG00000154305	MIA family member 3, ER export factor	HITS-CLIP
EDC3	ENSG00000179151	enhancer of mRNA decapping 3	HITS-CLIP
DNAJA3	ENSG00000103423	DnaJ heat shock protein family (Hsp40) member A3	HITS-CLIP
APAF1	ENSG00000120868	apoptotic peptidase activating factor 1	HITS-CLIP
RAB5C	ENSG00000108774	RAB5C, member RAS oncogene family	HITS-CLIP
SEMA4B	ENSG00000185033	semaphorin 4B	HITS-CLIP
AP5M1	ENSG00000053770	adaptor related protein complex 5 subunit mu 1	HITS-CLIP
PSMG4	ENSG00000180822	proteasome assembly chaperone 4	HITS-CLIP
SETBP1	ENSG00000152217	SET binding protein 1	HITS-CLIP
FMR1	ENSG00000102081	fragile X mental retardation 1	HITS-CLIP
TGFB1I1	ENSG00000140682	transforming growth factor beta 1 induced transcript 1	HITS-CLIP
RNF11	ENSG00000123091	ring finger protein 11	HITS-CLIP
SENP3	ENSG00000161956	SUMO specific peptidase 3	HITS-CLIP
MAP1B	ENSG00000131711	microtubule associated protein 1B	HITS-CLIP
DIAPH1	ENSG00000131504	diaphanous related formin 1	HITS-CLIP
PALM2	ENSG00000243444	paralemmin 2	CLASH
HMGA1	ENSG00000137309	high mobility group AT-hook 1	HITS-CLIP
SF1	ENSG00000168066	splicing factor 1	HITS-CLIP
SPTBN1	ENSG00000115306	spectrin beta, non-erythrocytic 1	HITS-CLIP
NFS1	ENSG00000244005	NFS1, cysteine desulfurase	HITS-CLIP
SAP18	ENSG00000150459	Sin3A associated protein 18	HITS-CLIP
RGS5	ENSG00000143248	regulator of G protein signaling 5	HITS-CLIP
KDM2A	ENSG00000173120	lysine demethylase 2A	HITS-CLIP
USP24	ENSG00000162402	ubiquitin specific peptidase 24	HITS-CLIP
ZNF711	ENSG00000147180	zinc finger protein 711	HITS-CLIP
PAM	ENSG00000145730	peptidylglycine alpha-amidating monooxygenase	HITS-CLIP
BCL2L2	ENSG00000129473	BCL2 like 2	HITS-CLIP
IGF2BP1	ENSG00000159217	insulin like growth factor 2 mRNA binding protein 1	HITS-CLIP
UBTD1	ENSG00000165886	ubiquitin domain containing 1	HITS-CLIP
SDE2	ENSG00000143751	SDE2 telomere maintenance homolog	HITS-CLIP
ATP5F1A	ENSG00000152234	ATP synthase F1 subunit alpha	CLASH
COMMD7	ENSG00000149600	COMM domain containing 7	HITS-CLIP
SIRT1	ENSG00000096717	sirtuin 1	HITS-CLIP
CITED2	ENSG00000164442	Cbp/p300 interacting transactivator with Glu/Asp rich carboxy-terminal domain 2	HITS-CLIP
C6orf132	ENSG00000188112	chromosome 6 open reading frame 132	HITS-CLIP
RP1L1	ENSG00000183638	RP1 like 1	HITS-CLIP
GLG1	ENSG00000090863	golgi glycoprotein 1	HITS-CLIP
NEFM	ENSG00000104722	neurofilament medium	HITS-CLIP
BIRC5	ENSG00000089685	baculoviral IAP repeat containing 5	HITS-CLIP
PCDH1	ENSG00000156453	protocadherin 1	HITS-CLIP
MARCH9	ENSG00000139266	membrane associated ring-CH-type finger 9	HITS-CLIP
PCDH9	ENSG00000184226	protocadherin 9	HITS-CLIP
UBE2D3	ENSG00000109332	ubiquitin conjugating enzyme E2 D3	HITS-CLIP
ZNFX1	ENSG00000124201	zinc finger NFX1-type containing 1	HITS-CLIP
SFI1	ENSG00000198089	SFI1 centrin binding protein	HITS-CLIP
TAF15	ENSG00000270647	TATA-box binding protein associated factor 15	HITS-CLIP
ACACA	ENSG00000278540	acetyl-CoA carboxylase alpha	HITS-CLIP
R3HDM4	ENSG00000198858	R3H domain containing 4	HITS-CLIP
SLC15A2	ENSG00000163406	solute carrier family 15 member 2	HITS-CLIP
CBX6	ENSG00000183741	chromobox 6	HITS-CLIP
BPTF	ENSG00000171634	bromodomain PHD finger transcription factor	HITS-CLIP
SLC6A8	ENSG00000130821	solute carrier family 6 member 8	HITS-CLIP
ANK2	ENSG00000145362	ankyrin 2	HITS-CLIP
SDK2	ENSG00000069188	sidekick cell adhesion molecule 2	HITS-CLIP
PPARGC1B	ENSG00000155846	PPARG coactivator 1 beta	HITS-CLIP
ZNF316	ENSG00000205903	zinc finger protein 316	HITS-CLIP
SFT2D2	ENSG00000213064	SFT2 domain containing 2	HITS-CLIP
REPS2	ENSG00000169891	RALBP1 associated Eps domain containing 2	HITS-CLIP
PURA	ENSG00000185129	purine rich element binding protein A	HITS-CLIP
EFHD2	ENSG00000142634	EF-hand domain family member D2	HITS-CLIP
ADAM17	ENSG00000151694	ADAM metallopeptidase domain 17	HITS-CLIP
IFI30	ENSG00000216490	IFI30, lysosomal thiol reductase	CLASH
VPS39	ENSG00000166887	VPS39, HOPS complex subunit	HITS-CLIP
KRR1	ENSG00000111615	KRR1, small subunit processome component homolog	Chimeric fragments
PTPRN2	ENSG00000155093	protein tyrosine phosphatase, receptor type N2	HITS-CLIP
EIF3I	ENSG00000084623	eukaryotic translation initiation factor 3 subunit I	HITS-CLIP
AKAP12	ENSG00000131016	A-kinase anchoring protein 12	HITS-CLIP
PLPP3	ENSG00000162407	phospholipid phosphatase 3	HITS-CLIP
CCDC136	ENSG00000128596	coiled-coil domain containing 136	HITS-CLIP
FXR1	ENSG00000114416	FMR1 autosomal homolog 1	HITS-CLIP
DDX1	ENSG00000079785	DEAD-box helicase 1	HITS-CLIP
C6orf62	ENSG00000112308	chromosome 6 open reading frame 62	HITS-CLIP
CALM1	ENSG00000198668	calmodulin 1	HITS-CLIP
MAP9	ENSG00000164114	microtubule associated protein 9	HITS-CLIP
GNAQ	ENSG00000156052	G protein subunit alpha q	HITS-CLIP
RNF169	ENSG00000166439	ring finger protein 169	HITS-CLIP
FBXL16	ENSG00000127585	F-box and leucine rich repeat protein 16	HITS-CLIP
KIF2A	ENSG00000068796	kinesin family member 2A	HITS-CLIP
PLEKHA8	ENSG00000106086	pleckstrin homology domain containing A8	HITS-CLIP
GLCE	ENSG00000138604	glucuronic acid epimerase	HITS-CLIP
MCL1	ENSG00000143384	MCL1, BCL2 family apoptosis regulator	HITS-CLIP
RIC8A	ENSG00000177963	RIC8 guanine nucleotide exchange factor A	HITS-CLIP
NFE2L2	ENSG00000116044	nuclear factor, erythroid 2 like 2	HITS-CLIP
MT-CO1	ENSG00000198804	mitochondrially encoded cytochrome c oxidase I	CLASH
SPTAN1	ENSG00000197694	spectrin alpha, non-erythrocytic 1	HITS-CLIP
RPL5	ENSG00000122406	ribosomal protein L5	HITS-CLIP
L3MBTL2	ENSG00000100395	L3MBTL2, polycomb repressive complex 1 subunit	HITS-CLIP
MAP1A	ENSG00000166963	microtubule associated protein 1A	HITS-CLIP
ENSA	ENSG00000143420	endosulfine alpha	HITS-CLIP
HIVEP2	ENSG00000010818	human immunodeficiency virus type I enhancer binding protein 2	HITS-CLIP
DNM2	ENSG00000079805	dynamin 2	HITS-CLIP
RCC2	ENSG00000179051	regulator of chromosome condensation 2	HITS-CLIP
SCD	ENSG00000099194	stearoyl-CoA desaturase	HITS-CLIP
LRPPRC	ENSG00000138095	leucine rich pentatricopeptide repeat containing	HITS-CLIP
CTDSP1	ENSG00000144579	CTD small phosphatase 1	HITS-CLIP
SLC38A2	ENSG00000134294	solute carrier family 38 member 2	HITS-CLIP
CHERP	ENSG00000085872	calcium homeostasis endoplasmic reticulum protein	HITS-CLIP
ZDHHC5	ENSG00000156599	zinc finger DHHC-type containing 5	HITS-CLIP
MARK4	ENSG00000007047	microtubule affinity regulating kinase 4	HITS-CLIP
POLD3	ENSG00000077514	DNA polymerase delta 3, accessory subunit	CLASH
ZNF24	ENSG00000172466	zinc finger protein 24	HITS-CLIP
AXIN1	ENSG00000103126	axin 1	HITS-CLIP
DDAH1	ENSG00000153904	dimethylarginine dimethylaminohydrolase 1	HITS-CLIP
PBXIP1	ENSG00000163346	PBX homeobox interacting protein 1	HITS-CLIP
RAB11FIP2	ENSG00000107560	RAB11 family interacting protein 2	HITS-CLIP
BTBD3	ENSG00000132640	BTB domain containing 3	HITS-CLIP
SYNPO	ENSG00000171992	synaptopodin	HITS-CLIP
ZNF217	ENSG00000171940	zinc finger protein 217	HITS-CLIP
TAOK3	ENSG00000135090	TAO kinase 3	HITS-CLIP
ESYT1	ENSG00000139641	extended synaptotagmin 1	HITS-CLIP
ACER3	ENSG00000078124	alkaline ceramidase 3	HITS-CLIP
MAPRE3	ENSG00000084764	microtubule associated protein RP/EB family member 3	HITS-CLIP
FOXJ3	ENSG00000198815	forkhead box J3	HITS-CLIP
ZSWIM6	ENSG00000130449	zinc finger SWIM-type containing 6	HITS-CLIP
IFNGR2	ENSG00000159128	interferon gamma receptor 2	HITS-CLIP
PAN3	ENSG00000152520	poly(A) specific ribonuclease subunit PAN3	HITS-CLIP
NCALD	ENSG00000104490	neurocalcin delta	HITS-CLIP
WDR62	ENSG00000075702	WD repeat domain 62	HITS-CLIP
SELENON	ENSG00000162430	selenoprotein N	CLASH
KDELR1	ENSG00000105438	KDEL endoplasmic reticulum protein retention receptor 1	HITS-CLIP
DDX39B	ENSG00000198563	DExD-box helicase 39B	HITS-CLIP
LMX1B	ENSG00000136944	LIM homeobox transcription factor 1 beta	HITS-CLIP
RASAL2	ENSG00000075391	RAS protein activator like 2	HITS-CLIP
PHACTR4	ENSG00000204138	phosphatase and actin regulator 4	HITS-CLIP
TMBIM6	ENSG00000139644	transmembrane BAX inhibitor motif containing 6	HITS-CLIP
CREBRF	ENSG00000164463	CREB3 regulatory factor	HITS-CLIP
HM13	ENSG00000101294	histocompatibility minor 13	HITS-CLIP
SUPT16H	ENSG00000092201	SPT16 homolog, facilitates chromatin remodeling subunit	HITS-CLIP
ZNF512	ENSG00000243943	zinc finger protein 512	HITS-CLIP
LGALS3BP	ENSG00000108679	galectin 3 binding protein	HITS-CLIP
KIAA0100	ENSG00000007202	KIAA0100	HITS-CLIP
NSMF	ENSG00000165802	NMDA receptor synaptonuclear signaling and neuronal migration factor	HITS-CLIP
SYMPK	ENSG00000125755	symplekin	HITS-CLIP
EIF3D	ENSG00000100353	eukaryotic translation initiation factor 3 subunit D	HITS-CLIP
UBQLN2	ENSG00000188021	ubiquilin 2	HITS-CLIP
ZCCHC3	ENSG00000247315	zinc finger CCHC-type containing 3	HITS-CLIP
PITX1	ENSG00000069011	paired like homeodomain 1	CLASH
GPX4	ENSG00000167468	glutathione peroxidase 4	HITS-CLIP
BCL6	ENSG00000113916	B cell CLL/lymphoma 6	HITS-CLIP
ATP8B2	ENSG00000143515	ATPase phospholipid transporting 8B2	HITS-CLIP
AFF4	ENSG00000072364	AF4/FMR2 family member 4	HITS-CLIP
CSNK1E	ENSG00000213923	casein kinase 1 epsilon	HITS-CLIP
C2CD2L	ENSG00000172375	C2CD2 like	HITS-CLIP
RABGAP1L	ENSG00000152061	RAB GTPase activating protein 1 like	HITS-CLIP
NAP1L5	ENSG00000177432	nucleosome assembly protein 1 like 5	HITS-CLIP
STX16	ENSG00000124222	syntaxin 16	HITS-CLIP
LARP4	ENSG00000161813	La ribonucleoprotein domain family member 4	HITS-CLIP
CHMP7	ENSG00000147457	charged multivesicular body protein 7	HITS-CLIP
CTDSPL	ENSG00000144677	CTD small phosphatase like	HITS-CLIP
OSBPL8	ENSG00000091039	oxysterol binding protein like 8	CLASH
TPRG1L	ENSG00000158109	tumor protein p63 regulated 1 like	HITS-CLIP
DPYSL2	ENSG00000092964	dihydropyrimidinase like 2	HITS-CLIP
ARHGAP32	ENSG00000134909	Rho GTPase activating protein 32	HITS-CLIP
SOCS7	ENSG00000274211	suppressor of cytokine signaling 7	HITS-CLIP
AKIRIN1	ENSG00000174574	akirin 1	HITS-CLIP
RPS6KB1	ENSG00000108443	ribosomal protein S6 kinase B1	HITS-CLIP
ADCY9	ENSG00000162104	adenylate cyclase 9	HITS-CLIP
HNRNPM	ENSG00000099783	heterogeneous nuclear ribonucleoprotein M	HITS-CLIP
SKI	ENSG00000157933	SKI proto-oncogene	CLASH
TMEM69	ENSG00000159596	transmembrane protein 69	HITS-CLIP
RGP1	ENSG00000107185	RGP1 homolog, RAB6A GEF complex partner 1	HITS-CLIP
KCTD20	ENSG00000112078	potassium channel tetramerization domain containing 20	HITS-CLIP
DDI2	ENSG00000197312	DNA damage inducible 1 homolog 2	HITS-CLIP
CCDC88A	ENSG00000115355	coiled-coil domain containing 88A	HITS-CLIP
ZNF623	ENSG00000183309	zinc finger protein 623	HITS-CLIP
WDR93	ENSG00000140527	WD repeat domain 93	HITS-CLIP
YY1	ENSG00000100811	YY1 transcription factor	HITS-CLIP
TNKS1BP1	ENSG00000149115	tankyrase 1 binding protein 1	HITS-CLIP
BAG4	ENSG00000156735	BCL2 associated athanogene 4	HITS-CLIP
TMBIM1	ENSG00000135926	transmembrane BAX inhibitor motif containing 1	HITS-CLIP
ANP32A	ENSG00000140350	acidic nuclear phosphoprotein 32 family member A	HITS-CLIP
MLF2	ENSG00000089693	myeloid leukemia factor 2	HITS-CLIP
PRDX5	ENSG00000126432	peroxiredoxin 5	HITS-CLIP
IRS4	ENSG00000133124	insulin receptor substrate 4	HITS-CLIP
SLC25A44	ENSG00000160785	solute carrier family 25 member 44	HITS-CLIP
TANC2	ENSG00000170921	tetratricopeptide repeat, ankyrin repeat and coiled-coil containing 2	HITS-CLIP
EZH1	ENSG00000108799	enhancer of zeste 1 polycomb repressive complex 2 subunit	HITS-CLIP
KMT2A	ENSG00000118058	lysine methyltransferase 2A	HITS-CLIP
WSB1	ENSG00000109046	WD repeat and SOCS box containing 1	HITS-CLIP
EHBP1	ENSG00000115504	EH domain binding protein 1	HITS-CLIP
DHX30	ENSG00000132153	DExH-box helicase 30	HITS-CLIP
SYAP1	ENSG00000169895	synapse associated protein 1	HITS-CLIP
SLCO4A1	ENSG00000101187	solute carrier organic anion transporter family member 4A1	HITS-CLIP
XPNPEP3	ENSG00000196236	X-prolyl aminopeptidase 3	HITS-CLIP
EIF5	ENSG00000100664	eukaryotic translation initiation factor 5	HITS-CLIP
TTLL5	ENSG00000119685	tubulin tyrosine ligase like 5	HITS-CLIP
AHR	ENSG00000106546	aryl hydrocarbon receptor	HITS-CLIP
LMBR1L	ENSG00000139636	limb development membrane protein 1 like	HITS-CLIP
ADGRB3	ENSG00000135298	adhesion G protein-coupled receptor B3	HITS-CLIP
ITGB1	ENSG00000150093	integrin subunit beta 1	HITS-CLIP
USP1	ENSG00000162607	ubiquitin specific peptidase 1	HITS-CLIP
WEE1	ENSG00000166483	WEE1 G2 checkpoint kinase	HITS-CLIP
CHID1	ENSG00000177830	chitinase domain containing 1	HITS-CLIP
YWHAE	ENSG00000108953	tyrosine 3-monooxygenase/tryptophan 5-monooxygenase activation protein epsilon	CLASH, HITS-CLIP
DICER1	ENSG00000100697	dicer 1, ribonuclease III	HITS-CLIP
PRPF8	ENSG00000174231	pre-mRNA processing factor 8	HITS-CLIP
P4HB	ENSG00000185624	prolyl 4-hydroxylase subunit beta	HITS-CLIP
CEP295	ENSG00000166004	centrosomal protein 295	HITS-CLIP
EPRS	ENSG00000136628	glutamyl-prolyl-tRNA synthetase	HITS-CLIP
AKAP6	ENSG00000151320	A-kinase anchoring protein 6	HITS-CLIP
SYNGAP1	ENSG00000197283	synaptic Ras GTPase activating protein 1	HITS-CLIP
PIGQ	ENSG00000007541	phosphatidylinositol glycan anchor biosynthesis class Q	HITS-CLIP
COL5A2	ENSG00000204262	collagen type V alpha 2 chain	HITS-CLIP
FTH1	ENSG00000167996	ferritin heavy chain 1	HITS-CLIP
ZNF621	ENSG00000172888	zinc finger protein 621	CLASH
MAP7D1	ENSG00000116871	MAP7 domain containing 1	HITS-CLIP
SLC3A2	ENSG00000168003	solute carrier family 3 member 2	HITS-CLIP
CDK17	ENSG00000059758	cyclin dependent kinase 17	HITS-CLIP
SEPT7	ENSG00000122545	septin 7	HITS-CLIP
BICRA	ENSG00000063169	BRD4 interacting chromatin remodeling complex associated protein	HITS-CLIP
STEAP3	ENSG00000115107	STEAP3 metalloreductase	HITS-CLIP
NRSN2	ENSG00000125841	neurensin 2	HITS-CLIP
NCEH1	ENSG00000144959	neutral cholesterol ester hydrolase 1	HITS-CLIP
ADK	ENSG00000156110	adenosine kinase	HITS-CLIP
TNFSF15	ENSG00000181634	TNF superfamily member 15	HITS-CLIP
HEG1	ENSG00000173706	heart development protein with EGF like domains 1	HITS-CLIP
DNMBP	ENSG00000107554	dynamin binding protein	HITS-CLIP
CYFIP2	ENSG00000055163	cytoplasmic FMR1 interacting protein 2	HITS-CLIP
CKAP2L	ENSG00000169607	cytoskeleton associated protein 2 like	HITS-CLIP
URGCP	ENSG00000106608	upregulator of cell proliferation	HITS-CLIP
ZNF146	ENSG00000167635	zinc finger protein 146	HITS-CLIP
EEF1B2	ENSG00000114942	eukaryotic translation elongation factor 1 beta 2	CLASH
SEC23A	ENSG00000100934	Sec23 homolog A, coat complex II component	HITS-CLIP
PHF3	ENSG00000118482	PHD finger protein 3	HITS-CLIP
UAP1	ENSG00000117143	UDP-N-acetylglucosamine pyrophosphorylase 1	HITS-CLIP
B4GALNT4	ENSG00000182272	beta-1,4-N-acetyl-galactosaminyltransferase 4	HITS-CLIP
SGPL1	ENSG00000166224	sphingosine-1-phosphate lyase 1	HITS-CLIP
H1F0	ENSG00000189060	H1 histone family member 0	HITS-CLIP
NUP214	ENSG00000126883	nucleoporin 214	HITS-CLIP
PDCD6IP	ENSG00000170248	programmed cell death 6 interacting protein	HITS-CLIP
MYO10	ENSG00000145555	myosin X	HITS-CLIP
TRIM26	ENSG00000234127	tripartite motif containing 26	HITS-CLIP
ERGIC1	ENSG00000113719	endoplasmic reticulum-golgi intermediate compartment 1	HITS-CLIP
ZNF592	ENSG00000166716	zinc finger protein 592	HITS-CLIP
FAM234B	ENSG00000084444	family with sequence similarity 234 member B	HITS-CLIP
DNTTIP2	ENSG00000067334	deoxynucleotidyltransferase terminal interacting protein 2	HITS-CLIP
MAPK8IP3	ENSG00000138834	mitogen-activated protein kinase 8 interacting protein 3	HITS-CLIP
DDX17	ENSG00000100201	DEAD-box helicase 17	HITS-CLIP
EEF1D	ENSG00000104529	eukaryotic translation elongation factor 1 delta	HITS-CLIP
GDF11	ENSG00000135414	growth differentiation factor 11	HITS-CLIP
HIPK2	ENSG00000064393	homeodomain interacting protein kinase 2	HITS-CLIP
NRXN1	ENSG00000179915	neurexin 1	HITS-CLIP
KIFC1	ENSG00000237649	kinesin family member C1	HITS-CLIP
ELAVL4	ENSG00000162374	ELAV like RNA binding protein 4	HITS-CLIP
SZRD1	ENSG00000055070	SUZ RNA binding domain containing 1	HITS-CLIP
AVL9	ENSG00000105778	AVL9 cell migration associated	HITS-CLIP
GOLPH3	ENSG00000113384	golgi phosphoprotein 3	HITS-CLIP
MSH6	ENSG00000116062	mutS homolog 6	HITS-CLIP
MTHFSD	ENSG00000103248	methenyltetrahydrofolate synthetase domain containing	HITS-CLIP
CASP8AP2	ENSG00000118412	caspase 8 associated protein 2	HITS-CLIP
MAP3K4	ENSG00000085511	mitogen-activated protein kinase kinase kinase 4	HITS-CLIP
FBLN1	ENSG00000077942	fibulin 1	HITS-CLIP
ACLY	ENSG00000131473	ATP citrate lyase	CLASH
CALM3	ENSG00000160014	calmodulin 3	HITS-CLIP
OGFR	ENSG00000060491	opioid growth factor receptor	HITS-CLIP
NFE2L1	ENSG00000082641	nuclear factor, erythroid 2 like 1	HITS-CLIP
BTRC	ENSG00000166167	beta-transducin repeat containing E3 ubiquitin protein ligase	HITS-CLIP
ABHD14B	ENSG00000114779	abhydrolase domain containing 14B	HITS-CLIP
EPS8	ENSG00000151491	epidermal growth factor receptor pathway substrate 8	HITS-CLIP
UGP2	ENSG00000169764	UDP-glucose pyrophosphorylase 2	HITS-CLIP
CCDC71L	ENSG00000253276	coiled-coil domain containing 71 like	HITS-CLIP
HUWE1	ENSG00000086758	HECT, UBA and WWE domain containing 1, E3 ubiquitin protein ligase	HITS-CLIP
NMT1	ENSG00000136448	N-myristoyltransferase 1	HITS-CLIP
BSN	ENSG00000164061	bassoon presynaptic cytomatrix protein	HITS-CLIP
OSTF1	ENSG00000134996	osteoclast stimulating factor 1	HITS-CLIP
CALU	ENSG00000128595	calumenin	HITS-CLIP
WIZ	ENSG00000011451	widely interspaced zinc finger motifs	HITS-CLIP
GAPDH	ENSG00000111640	glyceraldehyde-3-phosphate dehydrogenase	CLASH
NEFL	ENSG00000277586	neurofilament light	HITS-CLIP
CHCHD3	ENSG00000106554	coiled-coil-helix-coiled-coil-helix domain containing 3	HITS-CLIP
SCRN3	ENSG00000144306	secernin 3	Chimeric fragments
STARD3	ENSG00000131748	StAR related lipid transfer domain containing 3	HITS-CLIP
TOP2B	ENSG00000077097	DNA topoisomerase II beta	HITS-CLIP
NME4	ENSG00000103202	NME/NM23 nucleoside diphosphate kinase 4	HITS-CLIP
RORA	ENSG00000069667	RAR related orphan receptor A	HITS-CLIP
EIF2S3	ENSG00000130741	eukaryotic translation initiation factor 2 subunit gamma	HITS-CLIP
RPL18	ENSG00000063177	ribosomal protein L18	HITS-CLIP
TRIP13	ENSG00000071539	thyroid hormone receptor interactor 13	HITS-CLIP
LRRC42	ENSG00000116212	leucine rich repeat containing 42	HITS-CLIP
PPFIA1	ENSG00000131626	PTPRF interacting protein alpha 1	HITS-CLIP
MARCKSL1	ENSG00000175130	MARCKS like 1	HITS-CLIP
DAB2	ENSG00000153071	DAB2, clathrin adaptor protein	HITS-CLIP
WDR70	ENSG00000082068	WD repeat domain 70	HITS-CLIP
ARMCX3	ENSG00000102401	armadillo repeat containing X-linked 3	HITS-CLIP
PNMA8B	ENSG00000204851	PNMA family member 8B	HITS-CLIP
ATP11B	ENSG00000058063	ATPase phospholipid transporting 11B (putative)	HITS-CLIP
E2F3	ENSG00000112242	E2F transcription factor 3	CLASH
ALCAM	ENSG00000170017	activated leukocyte cell adhesion molecule	HITS-CLIP
ATP2A2	ENSG00000174437	ATPase sarcoplasmic/endoplasmic reticulum Ca2+ transporting 2	HITS-CLIP
SRF	ENSG00000112658	serum response factor	HITS-CLIP
PHB	ENSG00000167085	prohibitin	HITS-CLIP
ZMIZ2	ENSG00000122515	zinc finger MIZ-type containing 2	HITS-CLIP
RABGGTB	ENSG00000137955	Rab geranylgeranyltransferase subunit beta	HITS-CLIP
OGT	ENSG00000147162	O-linked N-acetylglucosamine (GlcNAc) transferase	HITS-CLIP
CIAO1	ENSG00000144021	cytosolic iron-sulfur assembly component 1	HITS-CLIP
TRIM28	ENSG00000130726	tripartite motif containing 28	HITS-CLIP
SOGA1	ENSG00000149639	suppressor of glucose, autophagy associated 1	HITS-CLIP
MIDN	ENSG00000167470	midnolin	HITS-CLIP
PRRC2C	ENSG00000117523	proline rich coiled-coil 2C	HITS-CLIP
TMEM248	ENSG00000106609	transmembrane protein 248	HITS-CLIP
NEK7	ENSG00000151414	NIMA related kinase 7	HITS-CLIP
HNRNPR	ENSG00000125944	heterogeneous nuclear ribonucleoprotein R	HITS-CLIP
SHMT2	ENSG00000182199	serine hydroxymethyltransferase 2	HITS-CLIP
NAP1L1	ENSG00000187109	nucleosome assembly protein 1 like 1	HITS-CLIP
PEG3	ENSG00000198300	paternally expressed 3	HITS-CLIP
PGK1	ENSG00000102144	phosphoglycerate kinase 1	HITS-CLIP
NHSL2	ENSG00000204131	NHS like 2	HITS-CLIP
RNF26	ENSG00000173456	ring finger protein 26	HITS-CLIP
SMAD2	ENSG00000175387	SMAD family member 2	HITS-CLIP
PANK3	ENSG00000120137	pantothenate kinase 3	HITS-CLIP
STX10	ENSG00000104915	syntaxin 10	HITS-CLIP
GSTO1	ENSG00000148834	glutathione S-transferase omega 1	HITS-CLIP
CD2BP2	ENSG00000169217	CD2 cytoplasmic tail binding protein 2	HITS-CLIP
RBMS2	ENSG00000076067	RNA binding motif single stranded interacting protein 2	HITS-CLIP
SBNO2	ENSG00000064932	strawberry notch homolog 2	HITS-CLIP
TARDBP	ENSG00000120948	TAR DNA binding protein	HITS-CLIP
DAAM2	ENSG00000146122	dishevelled associated activator of morphogenesis 2	HITS-CLIP
TMEM109	ENSG00000110108	transmembrane protein 109	HITS-CLIP
EEF1A2	ENSG00000101210	eukaryotic translation elongation factor 1 alpha 2	HITS-CLIP
CXorf57	ENSG00000147231	chromosome X open reading frame 57	HITS-CLIP
TNFRSF10B	ENSG00000120889	TNF receptor superfamily member 10b	HITS-CLIP
LENG8	ENSG00000167615	leukocyte receptor cluster member 8	HITS-CLIP
NCOA5	ENSG00000124160	nuclear receptor coactivator 5	HITS-CLIP
PMP2	ENSG00000147588	peripheral myelin protein 2	HITS-CLIP
ACAP2	ENSG00000114331	ArfGAP with coiled-coil, ankyrin repeat and PH domains 2	HITS-CLIP
PABPC1	ENSG00000070756	poly(A) binding protein cytoplasmic 1	HITS-CLIP
TXNRD1	ENSG00000198431	thioredoxin reductase 1	HITS-CLIP
STRADB	ENSG00000082146	STE20-related kinase adaptor beta	HITS-CLIP
ESM1	ENSG00000164283	endothelial cell specific molecule 1	HITS-CLIP
CCDC43	ENSG00000180329	coiled-coil domain containing 43	HITS-CLIP
F5	ENSG00000198734	coagulation factor V	HITS-CLIP
TIA1	ENSG00000116001	TIA1 cytotoxic granule associated RNA binding protein	HITS-CLIP
FAM13C	ENSG00000148541	family with sequence similarity 13 member C	HITS-CLIP
CDK12	ENSG00000167258	cyclin dependent kinase 12	HITS-CLIP
EML6	ENSG00000214595	echinoderm microtubule associated protein like 6	HITS-CLIP
SMG5	ENSG00000198952	SMG5, nonsense mediated mRNA decay factor	HITS-CLIP
XRCC1	ENSG00000073050	X-ray repair cross complementing 1	HITS-CLIP
ATP6V1C1	ENSG00000155097	ATPase H+ transporting V1 subunit C1	HITS-CLIP
ANKRD52	ENSG00000139645	ankyrin repeat domain 52	HITS-CLIP
CHD6	ENSG00000124177	chromodomain helicase DNA binding protein 6	HITS-CLIP
DUSP7	ENSG00000164086	dual specificity phosphatase 7	HITS-CLIP
ACKR3	ENSG00000144476	atypical chemokine receptor 3	HITS-CLIP
FAM168B	ENSG00000152102	family with sequence similarity 168 member B	HITS-CLIP
BRPF3	ENSG00000096070	bromodomain and PHD finger containing 3	HITS-CLIP
TCEAL1	ENSG00000172465	transcription elongation factor A like 1	HITS-CLIP
RPL36	ENSG00000130255	ribosomal protein L36	HITS-CLIP
CCT7	ENSG00000135624	chaperonin containing TCP1 subunit 7	HITS-CLIP
SNX4	ENSG00000114520	sorting nexin 4	HITS-CLIP
QSOX2	ENSG00000165661	quiescin sulfhydryl oxidase 2	HITS-CLIP
SETD2	ENSG00000181555	SET domain containing 2	HITS-CLIP
HINT3	ENSG00000111911	histidine triad nucleotide binding protein 3	HITS-CLIP
TFPI2	ENSG00000105825	tissue factor pathway inhibitor 2	HITS-CLIP
ZFPM1	ENSG00000179588	zinc finger protein, FOG family member 1	HITS-CLIP
TSNAX	ENSG00000116918	translin associated factor X	HITS-CLIP
SNRNP200	ENSG00000144028	small nuclear ribonucleoprotein U5 subunit 200	CLASH
TROVE2	ENSG00000116747	TROVE domain family member 2	HITS-CLIP
FGFR1	ENSG00000077782	fibroblast growth factor receptor 1	Luciferase Reporter Assay
TKT	ENSG00000163931	transketolase	CLASH
MED26	ENSG00000105085	mediator complex subunit 26	HITS-CLIP
DDIT4	ENSG00000168209	DNA damage inducible transcript 4	HITS-CLIP
MAZ	ENSG00000103495	MYC associated zinc finger protein	HITS-CLIP
PLS3	ENSG00000102024	plastin 3	HITS-CLIP
SON	ENSG00000159140	SON DNA binding protein	HITS-CLIP
PIAS4	ENSG00000105229	protein inhibitor of activated STAT 4	HITS-CLIP
VEGFC	ENSG00000150630	vascular endothelial growth factor C	HITS-CLIP
CCNI	ENSG00000118816	cyclin I	HITS-CLIP
MRPL3	ENSG00000114686	mitochondrial ribosomal protein L3	HITS-CLIP
NCOR1	ENSG00000141027	nuclear receptor corepressor 1	HITS-CLIP
NRXN3	ENSG00000021645	neurexin 3	HITS-CLIP
IRAK1	ENSG00000184216	interleukin 1 receptor associated kinase 1	HITS-CLIP
CCNB1	ENSG00000134057	cyclin B1	HITS-CLIP
AAK1	ENSG00000115977	AP2 associated kinase 1	HITS-CLIP
SCRN1	ENSG00000136193	secernin 1	HITS-CLIP
GATAD2B	ENSG00000143614	GATA zinc finger domain containing 2B	HITS-CLIP
FOPNL	ENSG00000133393	FGFR1OP N-terminal like	HITS-CLIP
TRIM33	ENSG00000197323	tripartite motif containing 33	HITS-CLIP
SNRK	ENSG00000163788	SNF related kinase	HITS-CLIP
TOMM70	ENSG00000154174	translocase of outer mitochondrial membrane 70	HITS-CLIP
RFX7	ENSG00000181827	regulatory factor X7	HITS-CLIP
DUS1L	ENSG00000169718	dihydrouridine synthase 1 like	HITS-CLIP
FAM104A	ENSG00000133193	family with sequence similarity 104 member A	HITS-CLIP
TAF7	ENSG00000178913	TATA-box binding protein associated factor 7	HITS-CLIP
AHSA1	ENSG00000100591	activator of HSP90 ATPase activity 1	Chimeric fragments
TTI1	ENSG00000101407	TELO2 interacting protein 1	HITS-CLIP
TRIO	ENSG00000038382	trio Rho guanine nucleotide exchange factor	HITS-CLIP
RBM47	ENSG00000163694	RNA binding motif protein 47	HITS-CLIP
RAD23A	ENSG00000179262	RAD23 homolog A, nucleotide excision repair protein	HITS-CLIP
C1orf115	ENSG00000162817	chromosome 1 open reading frame 115	HITS-CLIP
FAM131A	ENSG00000175182	family with sequence similarity 131 member A	HITS-CLIP
PDP1	ENSG00000164951	pyruvate dehyrogenase phosphatase catalytic subunit 1	HITS-CLIP
