# Supplementary material for: Loss of epidermal microRNA-149 sensitizes to skin inflammation
Source: Research Square preprint supplement (doi:10.21203/rs.3.rs-6047392/v1), 2025-07-29
Supplement: Supplementary file 5 [file 6153350bb2301efbddb21560.xlsx]

## Sheet: Figure 1
	Fig.1c
		Dorsal Skin Thickness (mm)																	Two-tailed Unpaired t test
		conditions/n	1	2	3	4	5	6	7	8	9	10	11						P value	0,1149
		WT	0.27	0.28	0.27	0.28	0.27	0.27	0.27	0.27	0.27	0.27	0.28						Degrees of Freedom	df=20
		Mir149EKO	0.28	0.28	0.28	0.28	0.28	0.27	0.26	0.27	0.28	0.29	0.28						t value	t=1,648
		Ear Skin Thickness (mm)																	Two-tailed Unpaired t test
		conditions/n	1	2	3	4	5	6	7	8	9	10	11	12	13	14	15	16	P value	0.9418
		WT	0.175	0.19	0.185	0.17	0.185	0.185	0.175	0.18	0.195	0.2	0.2175	0.215	0.2	0.21	0.225	0.22	Degrees of Freedom	df=30
		Mir149EKO	0.18	0.175	0.185	0.18	0.185	0.18	0.185	0.175	0.22	0.225	0.215	0.21	0.225	0.195	0.21	0.19	t value	t=0,07359
	Fig.1f	Normalized Expression (Tweakr/Gapdh)																	Two-tailed Unpaired t test
		conditions/n	1	2	3	4													P value	p=0.0011
		WT	108.086	118.254	140.468	98.734													Degrees of Freedom	df=6
		Mir149EKO	277.959	315.487	282.953	199.316													t value	t=5.816
	Fig.1h	Normalized Expression (TWEAKR/18S)																	One-way ANOVA
			1	2	3	4	5	6	7										P value	0,0067
		H	0.0722027	0.118578	0.102666	0.0386652	0.0264894	0.04897	0.0326624										F value	F (2, 17) = 6,808
		PN	0.0384971	0.0495311	0.0613213	0.062568	0.0189999	0.091545	0.031193										Degrees of Freedom	2 (for treatment groups), 17 (for residual/error)
		PP	0.0957912	0.163348	0.134515	0.115287	0.0906083	0,6582362*	0.0723701
	Fig. 1i
	Correlation for miR-149 and TWEAKR Expression
		H							PN							PP
	miR-149	0.0722027	0.118578	0.102666	0.0386652	0.0264894	0.04897	0.0326624	0.0384971	0.0495311	0.0613213	0.062568	0.0189999	0.091545	0.031193	0.0957912	0.163348	0.134515	0.115287	0.0906083	0.158236	0.0723701
	TWEAKR	1.582	1.218	1.29	1.149	1.137	1.056	0.939	1.61	1.632	1.299	1.58	1.193	1.005	1.052	0.603	0.504	0.372	0.453	0.452	0.47	0.521
	Pearson r				P value			Number of XY Pairs	21
	r	-0.6005			P (one-tailed)	0.002
	95% confidence interval	-0,8197 to -0,2279			P value summary	**
	R squared	0.3606			Significant? (alpha = 0.05)	Yes

## Sheet: Figure 2
	Fig.2b
		Cxcl10									t value	Degrees of Freedom	Below threshold?	Summary	P value				Two-tailed Unpaired t test
		conditions/n	1	2	3	4	5	6		WT+Medium vs. Mir149EKO+Medium	3.474	8	Yes	*	0.0171				t value and Degrees of Freedom	t=2.857, df=10
		WT+Medium	0.234775	0.216192	0.346145	0.298631	0.319315	0.335032
		Mir149EKO+Medium	0.479154	0.264372	0.364793	0.427364	0.423237	0.502837		Tukey's multiple comparisons test	Mean Diff,	95,00% CI of diff,	Below threshold?	Summary	Adjusted P Value				One-way ANOVA
		WT+Tweak	0.783856	0.851861	0.809788	0.762038	0.675869	0.556491		WT+Medium vs. WT+Tweak	-0.4483	-0,6765 to -0,2201	Yes	***	0.0001				P value	<0,0001
		Mir149EKO+Tweak	0.952733	1.02577	1.41758	0.961625	0.829601	1.36408		Mir149EKO+Medium vs. Mir149EKO+Tweak	-0.6816	-0,9098 to -0,4534	Yes	****	<0.0001				F value	F (3, 20) = 38.91
										WT+Tweak vs. Mir149EKO+Tweak	-0.3519	-0,5801 to -0,1237	Yes	**	0.0018				Degrees of Freedom	3 (for treatment groups), 20 (for residual/error)
		Cxcl9								Tukey's multiple comparisons test	Mean Diff,	95,00% CI of diff,	Below threshold?	Summary	Adjusted P Value				One-way ANOVA
		conditions/n	1	2	3	4	5	6		WT+Medium vs. Mir149EKO+Medium	-0.04783	-0,07382 to -0,02184	Yes	***	0.0003				P value	<0.0001
		WT+Medium	0.0197878	0.0278213	0.0206067	0.0211184	0.0363628	0.0288791		WT+Medium vs. WT+Tweak	-0.03961	-0,06560 to -0,01362	Yes	**	0.0022				F value	F (3, 12) = 45,16
		Mir149EKO+Medium	0.0811674	0,034423009*	0.0627182	0.055683	0.08566	0.0827362		Mir149EKO+Medium vs. Mir149EKO+Tweak	-0.04591	-0,07189 to -0,01992	Yes	***	0.0005				Degrees of Freedom	3 (for treatment groups), 12 (for residual/error)
		WT+Tweak	0,043412917*	0.0646664	0.0790896	0.0588765	0.0612879	0.0629546		WT+Tweak vs. Mir149EKO+Tweak	-0.05412	-0,08011 to -0,02814	Yes	****	<0,0001
		Mir149EKO+Tweak	0.139302	0.0985742	0.115033	0.135779	0.144065	0.0842444
		Ccl5								Tukey's multiple comparisons test	Mean Diff,	95,00% CI of diff,	Below threshold?	Summary	Adjusted P Value				One-way ANOVA
		conditions/n	1	2	3	4	5	6		WT+Medium vs. Mir149EKO+Medium	-0.2929	-0,4585 to -0,1274	Yes	***	0.0004				P value	<0,0001
		WT+Medium	0.0829421	0.124009	0.151247	0.0861432	0.18728	0.12878		WT+Medium vs. WT+Tweak	-0.5055	-0,6790 to -0,3319	Yes	****	<0,0001				F value	F (3, 19) = 315,7
		Mir149EKO+Medium	0.430847	0.306848	0.486222	0.333651	0.448309	0.512181		Mir149EKO+Medium vs. Mir149EKO+Tweak	-1.394	-1,560 to -1,229	Yes	****	<0,0001				Degrees of Freedom	3 (for treatment groups), 19 (for residual/error)
		WT+Tweak	0.6724	0.562101	1.730685882*	0.668258	0.578861	0.679308		WT+Tweak vs. Mir149EKO+Tweak	-1.182	-1,355 to -1,008	Yes	****	<0,0001
		Mir149EKO+Tweak	2.09585	1.80238	1.82793	1.82927	1.75759	1.57003
		Ccl2								Tukey's multiple comparisons test	Mean Diff,	95,00% CI of diff,	Below threshold?	Summary	Adjusted P Value				One-way ANOVA
		conditions/n	1	2	3	4	5	6		WT+Medium vs. Mir149EKO+Medium	-9.323	-15,47 to -3,172	Yes	**	0.0021				P value	<0.0001
		WT+Medium	3.04957	7.78167	4.61028	2.41074	3.04957	4.61028		WT+Medium vs. WT+Tweak	-8.705	-14,86 to -2,554	Yes	**	0.0039				F value	F (3, 20) = 23,60
		Mir149EKO+Medium	10.8347	11.7332	11.4068	11.7706	16.2218	19.4828		Mir149EKO+Medium vs. Mir149EKO+Tweak	-9.155	-15,31 to -3,004	Yes	**	0.0025				Degrees of Freedom	3 (for treatment groups), 20 (for residual/error)
		WT+Tweak	8.65226	5.96376	17.0533	15.853	13.85	16.3689		WT+Tweak vs. Mir149EKO+Tweak	-9.773	-15,92 to -3,622	Yes	**	0.0013
		Mir149EKO+Tweak	20.5164	21.776	23.1115	30.8001	23.2428	16.9331
	Fig.2c
															β-actin	Total-P65	P-P65	Fold Change	Normalized Fold Change
															116.293	65.69	27.349	0.416334	1
															90.973	36.297	23.395	0.644544	1.54814
															98.411	66.582	47.893	0.719309	1.72772
															83.952	45.57	59.066	1.29616	3.11327
	Fig.2d
		CCL5									t value	Degrees of Freedom	Below threshold?	Summary	P value				Two-tailed Unpaired t test						Anti-Control+Medium vs. Anti-miR-149+Medium	-0.05516	-0,2914 to 0,1811	No	ns	0.8977
		conditions/n	1	2	3	4				Anti-Control+Medium vs. Anti-miR-149+Medium	8.138	6	Yes	***	0,0002				t value and Degrees of Freedom	t=8,138, df=6					Anti-Control+Medium vs. Anti-Control+TWEAK	-0.206	-0,4422 to 0,03020	No	ns	0.0953
		Anti-Control+Medium	0.0181098	0.0252922	0.0261231	0.0364432				Anti-Control+Medium vs. Anti-Control+TWEAK	6.751	6	Yes	***	0,0005				t value and Degrees of Freedom	t=6,751, df=6
		Anti-miR-149+Medium	0.0875508	0.0869161	0.0647639	0.0873636													One-way ANOVA
		Anti-Control+TWEAK	0.180002	0.302893	0.183975	0.263111				Tukey's multiple comparisons test	Mean Diff,	95,00% CI of diff,	Below threshold?	Summary	Adjusted P Value				P value	<0,0001					Anti-miR-149+Medium vs. Anti-miR-149+TWEAK	-0.4597	-0,6959 to -0,2235	Yes	***	0.0004
		Anti-miR-149+TWEAK	0.383749	0.440686	0.480623	0.860262				Anti-miR-149+Medium vs. Anti-miR-149+TWEAK	-0.4597	-0,6959 to -0,2235	Yes	***	0.0004				F value	F (3, 12) = 16,85					Anti-Control+TWEAK vs. Anti-miR-149+TWEAK	-0.3088	-0,5450 to -0,07263	Yes	*	0.0101
										Anti-Control+TWEAK vs. Anti-miR-149+TWEAK	-0.3088	-0,5450 to -0,07263	Yes	*	0.0101				Degrees of Freedom	3 (for treatment groups), 12 (for residual/error)
		CCL2								Tukey's multiple comparisons test	Mean Diff,	95,00% CI of diff,	Below threshold?	Summary	Adjusted P Value				One-way ANOVA
		conditions/n	1	2	3	4				Anti-Control+Medium vs. Anti-miR-149+Medium	-0.001959	-0,003075 to -0,0008428	Yes	**	0.0074				P value	<0,0001
		Anti-Control+Medium	0.00384226	0.0029181	0.00192103	0.00236347				Anti-Control+Medium vs. Anti-Control+TWEAK	-0.003579	-0,004785 to -0,002374	Yes	****	0.0002				F value	F (3, 12) = 49,03
		Anti-miR-149+Medium	0.00502148	0.00476717	0.00494458	0.00414723				Anti-miR-149+Medium vs. Anti-miR-149+TWEAK	-0.003752	-0,004868 to -0,002636	Yes	****	<0,0001				Degrees of Freedom	3 (for treatment groups), 12 (for residual/error)
		Anti-Control+TWEAK	0,004497541	0.00584897	0.00641486	0.0067575				Anti-Control+TWEAK vs. Anti-miR-149+TWEAK	-0.002131	-0,003337 to -0,0009258	Yes	**	0.0008
		Anti-miR-149+TWEAK	0.00846103	0.00865513	0.00826869	0.00850259
	Fig.2e
		Number of PBMCs/counting beads									t value	Degrees of Freedom	Below threshold?	Summary	P value				Two-tailed Unpaired t test
		conditions/n	1	2	3	4				Anti-Control+Medium vs. Anti-Control+TWEAK	3.274	4	Yes	*	0,0307				t value and Degrees of Freedom	t=3,274, df=4
		Anti-Control+Medium	217.5	332*	239.5	223.5
		Anti-miR-149+Medium	549	460.5	537.533	450				Tukey's multiple comparisons test	Mean Diff,	95,00% CI of diff,	Below threshold?	Summary	Adjusted P Value				One-way ANOVA
		Anti-Control+TWEAK	266	357.5	248,5*	335				Anti-Control+Medium vs. Anti-miR-149+Medium	-272.4	-420,5 to -124,4	Yes	**	0.001				P value	<0,0001
		Anti-miR-149+TWEAK	768.5	710	935.5	815.5				Anti-miR-149+Medium vs. Anti-miR-149+TWEAK	-308.1	-445,2 to -171,0	Yes	***	0.0002				F value	F (3, 10) = 57,97
										Anti-Control+TWEAK vs. Anti-miR-149+TWEAK	-487.9	-635,9 to -339,8	Yes	****	<0,0001				Degrees of Freedom	3 (for treatment groups), 10 (for residual/error)

## Sheet: Figure 3
	Fig.3b		n/Days	1	2	3	4	5
		WT-Vehicle	1	0	0	0	0.25	1.75
			2	0	0	1.25	1.25	1.5			Tukey's multiple comparisons test	Mean Diff,	95,00% CI of diff,	Below threshold?	Summary	Adjusted P Value
			3	0	0	0.5	1	1.75			WT-IMQ vs. Mir149EKO-IMQ	-1.011	-1,646 to -0,3749	Yes	***	0.0004
		Mir149EKO-Vehicle	1	0	0	1	1.5	2.25			WT-IMQ vs. WT-Vehicle	1.108	0,3003 to 1,916	Yes	**	0.003
			2	0	0	0.5	2	2.25			Mir149EKO-IMQ vs. Mir149EKO-Vehicle	1.736	0,9471 to 2,524	Yes	****	<0,0001
			3	0	0	0.5	1.75	3.25			WT-Vehicle vs. Mir149EKO-Vehicle	-0.3833	-1,316 to 0,5497	No	ns	0.7049
		WT-IMQ	1	0	0.5	0.75	2.75	4.5										Two-way ANOVA (Treatment)
			2	0	0	1.25	4	6			ANOVA table	SS (Type III)	DF	MS	F (DFn, DFd)	P value		P value	<0.0001
			3	0	0	1	1.5	2.5			Days	272.5	4	68.12	F (4, 87) = 71,58	P<0,0001		F value	F (3, 87) = 21,51
			4	0	0	2.25	2.25	3			Treatment	61.41	3	20.47	F (3, 87) = 21,51	P<0,0001		Degrees of Freedom	3 (for treatment groups), 87 (for residual/error)
			5	0	0.5	1.25	3.25	6.5			Residual	82.79	87	0.9516
			6	0	0.5	1.25	2.75	3.5
		Mir149EKO-IMQ	1	0	0.5	2.25	5	7.75
			2	0	0.5	2.75	5.5	6
			3	0	0.5	1.25	4	4.75
			4	0	0.25	2	5	6
			5	0	0.5	2	3.75	7.75
			6	0	0	3	4.5	5.75
			7	0	0	2	5	7.5
	Fig.3c
		Epidermis thickness										t value	Degrees of Freedom	Below threshold?	Summary	P value			Two-tailed Unpaired t test
		conditions/n	1	2	3	4	5				WT+Vehicle vs. Mir149EKO+Vehicle	2.504	4	No	ns	0,0665			t value and Degrees of Freedom	t=2,504, df=4
		WT+Vehicle	57.9166	39.8155	48.1592
		Mir149EKO+Vehicle	57.27	70.9875	78.1577						Tukey's multiple comparisons test	Mean Diff,	95,00% CI of diff,	Below threshold?	Summary	Adjusted P Value			One-way ANOVA
		WT+IMQ	82.2044	102.424	115.371	102.348	86.9161				WT+Vehicle vs. WT+IMQ	-49.22	-84,18 to -14,27	Yes	**	0.006			P value	<0,0001
		Mir149EKO+IMQ	121.427	130.542	167.829	153.346	172.292				Mir149EKO+Vehicle vs. Mir149EKO+IMQ	-80.28	-115,2 to -45,33	Yes	****	<0,0001			F value	F (3, 12) = 29,37
											WT+IMQ vs. Mir149EKO+IMQ	-51.23	-81,51 to -20,96	Yes	**	0.0015			Degrees of Freedom	3 (for treatment groups), 12 (for residual/error)
	Fig.3d
		CD45 positive cells per field										t value	Degrees of Freedom	Below threshold?	Summary	P value			Two-tailed Unpaired t test
		conditions/n	1	2	3	4	5				WT+Vehicle vs. Mir149EKO+Vehicle	2.504	4	No	ns	0,0721			t value and Degrees of Freedom	t=2,429, df=4
		WT+Vehicle	35	38	26						WT+Vehicle vs. WT+IMQ	3.06	6	Yes	*	0,0222			t value and Degrees of Freedom	t=3,060, df=6
		Mir149EKO+Vehicle	43	40	50														One-way ANOVA
		WT+IMQ	51	40	54	41	48				Tukey's multiple comparisons test	Mean Diff,	95,00% CI of diff,	Below threshold?	Summary	Adjusted P Value			P value	<0,0001
		Mir149EKO+IMQ	60	59	62	53	77				Mir149EKO+Vehicle vs. Mir149EKO+IMQ	-17.87	-33,20 to -2,532	Yes	*	0.0213			F value	F (3, 12) = 29,37
											WT+IMQ vs. Mir149EKO+IMQ	-15.4	-28,68 to -2,120	Yes	*	0.0219			Degrees of Freedom	3 (for treatment groups), 12 (for residual/error)
	Fig.3e	The vehicle groups included three mice from new experimental batches for qRT-PCR analysis
		S100a8										t value	Degrees of Freedom	Below threshold?	Summary	P value			Two-tailed Unpaired t test
		conditions/n	1	2	3	4	5	6	7		WT+Vehicle vs. Mir149EKO+Vehicle	3.792	10	Yes	**	0,0035			t value and Degrees of Freedom	t=3,792, df=10
		WT+Vehicle	61.1297	132.705	1.84627	90.4831	63.1967	34.2024				Mann-Whitney U	Sum of ranks	Below threshold?	Summary	P value			Two-tailed Mann Whitney test
		Mir149EKO+Vehicle	467.446	313.269	560.96	72.6797	257.594	569.276			WT+Vehicle vs. WT+IMQ	4	25 , 53	Yes	*	0,0260			One-way ANOVA
		WT+IMQ	857.729	3100.73	137.322	1377.27	74.3398	75.0313			Tukey's multiple comparisons test	Mean Diff,	95,00% CI of diff,	Below threshold?	Summary	Adjusted P Value			P value	0,0017
		Mir149EKO+IMQ	802.137	4161.63	5668.76	217.31	8284.26	13064.9	5749.15		Mir149EKO+Vehicle vs. Mir149EKO+IMQ	-5048	-8816 to -1279	Yes	**	0.0062			F value	F (3, 21) = 7,141
											WT+IMQ vs. Mir149EKO+IMQ	-4484	-8252 to -715,8	Yes	*	0.016			Degrees of Freedom	3 (for treatment groups), 21 (for residual/error)
		S100a9										t value	Degrees of Freedom	Below threshold?	Summary	P value			Two-tailed Unpaired t test
		conditions/n	1	2	3	4	5	6	7		WT+Vehicle vs. Mir149EKO+Vehicle	2.972	10	Yes	*	0,0140			t value and Degrees of Freedom	t=2,972, df=10
		WT+Vehicle	66.1944	56.2155	2.86779	31.1832	33.0863	5.75725				Mann-Whitney U	Sum of ranks	Below threshold?	Summary	P value			Two-tailed Mann Whitney test
		Mir149EKO+Vehicle	176.423	76.6409	180.561	22.4986	88.1511	144.624			WT+Vehicle vs. WT+IMQ	3	24 , 54	Yes	*	0,0152			One-way ANOVA
		WT+IMQ	433.641	1641.43	66.9343	553.94	45.142	57.237			Tukey's multiple comparisons test	Mean Diff,	95,00% CI of diff,	Below threshold?	Summary	Adjusted P Value			P value	P=0,0018
		Mir149EKO+IMQ	391.705	2412.83	2949.97	93.7397	4110.31	7006.81	2819.09		Mir149EKO+Vehicle vs. Mir149EKO+IMQ	-2712	-4703 to -720,4	Yes	**	0.0054			F value	F (3, 21) = 7,133
											WT+IMQ vs. Mir149EKO+IMQ	-2360	-4351 to -368,8	Yes	*	0.0165			Degrees of Freedom	3 (for treatment groups), 21 (for residual/error)
		Tweakr										t value	Degrees of Freedom	Below threshold?	Summary	P value			Two-tailed Unpaired t test
		conditions/n	1	2	3	4	5	6	7		WT+Vehicle vs. Mir149EKO+Vehicle	2.672	10	Yes	*	0,0234			t value and Degrees of Freedom	t=2,672, df=10
		WT+Vehicle	5.59545	3.25532	10.0016	0.453012	5.69377	10.6151			WT+Vehicle vs. WT+IMQ	3.155	10	Yes	*	0,0102			t value and Degrees of Freedom	t=3,155, df=10
		Mir149EKO+Vehicle	6.87716	6.29952	16.5972	14.2378	16.947	15.3762											One-way ANOVA
		WT+IMQ	13.5899	13.467	9.36284	11.6452	20.858	10.3847			Tukey's multiple comparisons test	Mean Diff,	95,00% CI of diff,	Below threshold?	Summary	Adjusted P Value			P value	P=0,0004
		Mir149EKO+IMQ	16.0834	25.9293	28.6872	15.4307	36.4628	48.7661	18.6459		Mir149EKO+Vehicle vs. Mir149EKO+IMQ	-14.42	-25,98 to -2,859	Yes	*	0.0112			F value	F (3, 21) = 9,437
											WT+IMQ vs. Mir149EKO+IMQ	-13.93	-25,49 to -2,364	Yes	*	0.0146			Degrees of Freedom	3 (for treatment groups), 21 (for residual/error)

## Sheet: Figure 4
	Fig. 4b
		n/Days	1	2	3	4	5	6	7	8	9	10	11	12	13		Tukey's multiple comparisons test	Mean Diff,	95,00% CI of diff,	Below threshold?	Summary	Adjusted P Value
	WT-IL23	1	0.18	0.22	0.21	0.23	0.24	0.23	0.27	0.3	0.31	0.32	0.34	0.37	0.41		WT-IL23 vs. Mir149EKO-IL23	-0.02096	-0,02734 to -0,01458	Yes	****	<0,0001
		2	0.18	0.18	0.19	0.24	0.25	0.25	0.27	0.27	0.31	0.33	0.33	0.34	0.36		WT-IL23 vs. WT-PBS	0.06721	0,06083 to 0,07359	Yes	****	<0,0001
		3	0.18	0.22	0.21	0.23	0.21	0.25	0.27	0.29	0.35	0.33	0.34	0.35	0.37		Mir149EKO-IL23 vs. Mir149EKO-PBS	0.08538	0,07900 to 0,09177	Yes	****	<0,0001
		4	0.18	0.21	0.22	0.23	0.23	0.27	0.3	0.32	0.31	0.31	0.34	0.36	0.4		WT-PBS vs. Mir149EKO-PBS	-0.002788	-0,009169 to 0,003592	No	ns	0.6725
		5	0.19	0.18	0.21	0.23	0.24	0.24	0.27	0.29	0.29	0.31	0.33	0.36	0.38
		6	0.19	0.22	0.24	0.23	0.25	0.25	0.27	0.27	0.32	0.36	0.35	0.35	0.4		ANOVA table	SS	DF	MS	F (DFn, DFd)	P value
		7	0.2	0.23	0.2	0.25	0.24	0.27	0.31	0.33	0.35	0.4	0.4	0.4	0.4		Interaction	0.3493	36	0.009703	F (36, 364) = 30,53	P<0,0001
		8	0.18	0.22	0.22	0.24	0.24	0.25	0.27	0.32	0.32	0.32	0.35	0.38	0.39		Day	0.891	12	0.07425	F (12, 364) = 233,6	P<0,0001
	Mir149EKO-IL23	1	0.18	0.22	0.23	0.22	0.23	0.24	0.3	0.37	0.4	0.4	0.41	0.42	0.46		Condition	0.6287	3	0.2096	F (3, 364) = 659,4	P<0,0001
		2	0.18	0.22	0.21	0.24	0.24	0.25	0.29	0.34	0.36	0.4	0.4	0.41	0.46		Residual	0.1157	364	0.0003178
		3	0.19	0.22	0.22	0.25	0.22	0.23	0.26	0.32	0.32	0.33	0.33	0.36	0.42
		4	0.18	0.22	0.2	0.23	0.25	0.28	0.3	0.35	0.32	0.38	0.38	0.43	0.43			Two-way ANOVA (Condition)
		5	0.18	0.2	0.2	0.23	0.2	0.24	0.26	0.28	0.3	0.33	0.36	0.4	0.41			P value	<0.0001
		6	0.18	0.22	0.2	0.24	0.25	0.27	0.31	0.35	0.43	0.43	0.43	0.44	0.45			F value	F (3, 364) = 659,4
		7	0.19	0.2	0.19	0.23	0.25	0.26	0.3	0.3	0.36	0.37	0.39	0.44	0.5			Degrees of Freedom	3 (for treatment groups), 364 (for residual/error)
		8	0.16	0.23	0.22	0.23	0.23	0.25	0.3	0.37	0.39	0.38	0.4	0.43	0.43
	WT-PBS	1	0.17	0.19	0.19	0.19	0.22	0.2	0.2	0.21	0.22	0.22	0.22	0.24	0.24
		2	0.19	0.19	0.2	0.22	0.2	0.21	0.21	0.22	0.23	0.23	0.23	0.23	0.24
		3	0.19	0.2	0.21	0.22	0.21	0.22	0.21	0.24	0.23	0.24	0.26	0.25	0.29
		4	0.17	0.21	0.21	0.23	0.23	0.22	0.22	0.22	0.23	0.22	0.24	0.23	0.27
		5	0.18	0.2	0.19	0.22	0.2	0.2	0.2	0.22	0.22	0.23	0.22	0.23	0.23
		6	0.18	0.19	0.2	0.21	0.2	0.18	0.19	0.21	0.22	0.22	0.22	0.22	0.22
		7	0.17	0.19	0.2	0.2	0.21	0.22	0.22	0.23	0.24	0.22	0.23	0.25	0.26
		8	0.17	0.19	0.17	0.21	0.19	0.21	0.2	0.21	0.22	0.22	0.23	0.25	0.23
	Mir149EKO-PBS	1	0.21	0.19	0.21	0.21	0.19	0.2	0.2	0.2	0.23	0.24	0.23	0.23	0.24
		2	0.21	0.2	0.2	0.21	0.21	0.19	0.2	0.23	0.23	0.24	0.23	0.23	0.26
		3	0.17	0.18	0.2	0.2	0.2	0.21	0.21	0.22	0.22	0.21	0.23	0.25	0.26
		4	0.19	0.23	0.21	0.22	0.19	0.21	0.2	0.23	0.23	0.23	0.25	0.25	0.28
		5	0.18	0.2	0.19	0.23	0.21	0.21	0.21	0.22	0.22	0.23	0.23	0.23	0.25
		6	0.18	0.19	0.2	0.21	0.19	0.21	0.2	0.22	0.23	0.23	0.24	0.22	0.26
		7	0.16	0.21	0.2	0.2	0.21	0.19	0.2	0.22	0.23	0.22	0.23	0.24	0.26
		8	0.18	0.2	0.2	0.21	0.21	0.22	0.22	0.23	0.25	0.22	0.25	0.28	0.28
	Fig.4c
		Epidermis thickness										Two-tailed Unpaired t test						t value	Degrees of Freedom	Below threshold?	Summary	P value
		conditions/n	1	2	3	4	5	6	7	8		t value and Degrees of Freedom	t=2,320, df=14				WT-IL23 vs. Mir149EKO-IL23	2.32	14	Yes	*	0,0360
		WT-PBS	23.8476	17.8629	16.2365
		Mir149EKO-PBS	23.6228	15.7242	19.2462							One-way ANOVA					Tukey's multiple comparisons test	Mean Diff,	95,00% CI of diff,	Below threshold?	Summary	Adjusted P Value
		WT-IL23	42.2687	40.5956	32.6356	72.6945	45.4085	65.6265	67.5338	53.4454		P value	<0,0001				WT-PBS vs. Mir149EKO-PBS	-0.2154	-35,59 to 35,16	No	ns	>0,9999
		Mir149EKO-IL23	55.3393	64.8047	66.8105	73.1986	55.6855	116.695	78.4703	69.2953		F value	F (3, 18) = 13,77				WT-PBS vs. WT-IL23	-33.21	-62,54 to -3,878	Yes	*	0.0234
												Degrees of Freedom	3 (for treatment groups), 18 (for residual/error)				Mir149EKO-PBS vs. Mir149EKO-IL23	-53.01	-82,34 to -23,67	Yes	***	0.0004
	Fig.4d
		BrdU positive cells per 50 basal cells										Two-tailed Unpaired t test						t value	Degrees of Freedom	Below threshold?	Summary	P value
		conditions/n	1	2	3	4	5	6	7	8		t value and Degrees of Freedom	t=6,151, df=4				WT-PBS vs. Mir149EKO-PBS	6.151	4	Yes	**	0,0035
		WT-PBS	4.2	4.8	4.7							t value and Degrees of Freedom	t=2,678, df=9				WT-PBS vs. WT-IL23	2.678	9	Yes	*	0.0253
		Mir149EKO-PBS	9.4	13	12.6							One-way ANOVA
		WT-IL23	4	6.5	16.5	11.8	13.3	10.8	13.5	11.3		P value	<0,0001				Tukey's multiple comparisons test	Mean Diff,	95,00% CI of diff,	Below threshold?	Summary	Adjusted P Value
		Mir149EKO-IL23	17	16.8	18.6	20.9	33.4	16.5	23.9	20.1		F value	F (3, 18) = 13,77				Mir149EKO-PBS vs. Mir149EKO-IL23	-9.233	-17,58 to -0,8887	Yes	*	0.0272
												Degrees of Freedom	3 (for treatment groups), 18 (for residual/error)				WT-IL23 vs. Mir149EKO-IL23	-9.938	-16,10 to -3,775	Yes	**	0.0013
	Fig.4e
		Frequency of Ly6g/CD11b positive cells
		conditions/n	1	2	3							Two-tailed Unpaired t test						t value	Degrees of Freedom	Below threshold?	Summary	P value
		PBS	0.066	0.094	0.047							t value and Degrees of Freedom	t=3,210, df=4				IL-23 vs. PBS	3.21	4	Yes	*	0,0326
		IL-23	0.19	0.39	0.23
		Frequency of F4-80/CD11b positive cells
		conditions/n	1	2	3							Two-tailed Unpaired t test						t value	Degrees of Freedom	Below threshold?	Summary	P value
		PBS	1.54	1.59	1.49							t value and Degrees of Freedom	t=4,862, df=4				IL-23 vs. PBS	4.862	4	Yes	**	0,0083
		IL-23	2.02	2.29	2.54
		Frequency of CD3 positive cells
		conditions/n	1	2	3							Two-tailed Unpaired t test						t value	Degrees of Freedom	Below threshold?	Summary	P value
		PBS	4.15	4.05	3.43							t value and Degrees of Freedom	t=5,472, df=4				IL-23 vs. PBS	5.472	4	Yes	**	0,0054
		IL-23	5.2	5.77	5.98
	Fig.4f
		Frequency of CD45 positive cells
		conditions/n	1	2	3							Two-tailed Unpaired t test						t value	Degrees of Freedom	Below threshold?	Summary	P value
		WT-IL23	7.13	6.64	5.37							t value and Degrees of Freedom	t=4,274, df=4				WT-IL23 vs. Mir149EKO-IL23	4.274	4	Yes	*	0,0129
		Mir149EKO-IL23	8.72	9.06	10.2
	Fig.4g
		Il-6											t value	Degrees of Freedom	Below threshold?	Summary	P value		Two-tailed Unpaired t test
		conditions/n	1	2	3	4	5	6	7	8		WT-PBS vs. Mir149EKO-PBS	2.553	8	Yes	*	0,0340		t value and Degrees of Freedom	t=2,553, df=8
		WT-PBS	1.81849	1.36889	2.54131	3.9483	18,82252974*	7,103075448*	0.814025			WT-PBS vs. WT-IL23	3.148	11	Yes	**	0,0093		t value and Degrees of Freedom	t=3,148, df=11
		Mir149EKO-PBS	3.7082	7.01293	2.14792	0,300985382*	7.24037	1,124660209*	10.7481										One-way ANOVA
		WT-IL23	4.32002	17.2905	22.5734	14.4938	25.8591	7.69171	30.6355	5.98187		Tukey's multiple comparisons test	Mean Diff,	95,00% CI of diff,	Below threshold?	Summary	Adjusted P Value		P value	P=0,0007
		Mir149EKO-IL23	1,173937783*	7.54691	49.1184	55.2184	23.3317	84.4496	36.4866	7.230406043*		Mir149EKO-PBS vs. Mir149EKO-IL23	-36.52	-61,39 to -11,65	Yes	**	0.0028		F value	F (3, 20) = 8,747
												WT-IL23 vs. Mir149EKO-IL23	-26.59	-48,77 to -4,407	Yes	*	0.0153		Degrees of Freedom	3 (for treatment groups), 20 (for residual/error)
		Il-17a											t value	Degrees of Freedom	Below threshold?	Summary	P value		Two-tailed Unpaired t test
		conditions/n	1	2	3	4	5	6	7	8		WT-PBS vs. WT-IL23	3.128	13	Yes	**	0,0080		t value and Degrees of Freedom	t=3,128, df=13
		WT-PBS	0	0	0	0	0	0	0
		Mir149EKO-PBS	0	0	0	0	0	0	0			Tukey's multiple comparisons test	Mean Diff,	95,00% CI of diff,	Below threshold?	Summary	Adjusted P Value		One-way ANOVA
		WT-IL23	20.4373	20.2293	2.74972	5.23838	29.7768	1.66616	21.5926	3.19202		Mir149EKO-PBS vs. Mir149EKO-IL23	-31.77	-46,07 to -17,46	Yes	****	<0,0001		P value	P<0,0001
		Mir149EKO-IL23	65.1159	26.9713	34.2162	25.6879	1.646369493*	15.8579	22.6041	31.9054		WT-IL23 vs. Mir149EKO-IL23	-18.66	-32,51 to -4,800	Yes	**	0.0055		F value	F (3, 25) = 16,70
																			Degrees of Freedom	3 (for treatment groups), 25 (for residual/error)
		Tweakr											t value	Degrees of Freedom	Below threshold?	Summary	P value		Two-tailed Unpaired t test
		conditions/n	1	2	3	4	5	6	7	8		WT-PBS vs. Mir149EKO-PBS	3.469	9	Yes	**	0,0071		t value and Degrees of Freedom	t=3,469, df=9
		WT-PBS	3.33574	5.05567	6.37329	13,89610113*	11,2369261*	4.47493	1.67551			WT-PBS vs. WT-IL23	2.5	9	Yes	*	0,0338		t value and Degrees of Freedom	t=2,500, df=9
No		Mir149EKO-PBS	8.85671	16.4655	4,243343723*	7.14014	19.7021	14.2491	8.55283										One-way ANOVA
		WT-IL23	13.1215	18.9154	5.61297	18.6863	59,88265858*	5.44672	65,63790759*	7.29229		Tukey's multiple comparisons test	Mean Diff,	95,00% CI of diff,	Below threshold?	Summary	Adjusted P Value		P value	P=0,0002
		Mir149EKO-IL23	26.3977	6,294825103*	22.8171	18.4293	18.9043	11.611	33.7779	31.8923		Mir149EKO-PBS vs. Mir149EKO-IL23	-10.91	-20,20 to -1,618	Yes	*	0.0178		F value	F (3, 20) = 10,76
												WT-IL23 vs. Mir149EKO-IL23	-11.89	-21,18 to -2,599	Yes	**	0.0093		Degrees of Freedom	3 (for treatment groups), 20 (for residual/error)
		Il1f9											t value	Degrees of Freedom	Below threshold?	Summary	P value		Two-tailed Unpaired t test
		conditions/n	1	2	3	4	5	6	7	8		WT-PBS vs. WT-IL23	3.167	10	Yes	*	0,0100		t value and Degrees of Freedom	t=3,167, df=10
		WT-PBS	16.2995	6.2217	41.2419	53.1981	13.2274	65.4058	65.0982
		Mir149EKO-PBS	30.265	43.8663	39.4215	92.081	12.0317	144,8781*	283,5185*			Tukey's multiple comparisons test	Mean Diff,	95,00% CI of diff,	Below threshold?	Summary	Adjusted P Value		One-way ANOVA
		WT-IL23	121.859	201.376	151.883	560,7213*	122.607	19.1553	460,8789*	8,6906*		WT-PBS vs. Mir149EKO-PBS	-6.291	-117,0 to 104,4	No	ns	0.9985		P value	P=0,0039
		Mir149EKO-IL23	198.484	114.682	135.459	72.5543	42.9809	212.787	100.151	382.092		Mir149EKO-PBS vs. Mir149EKO-IL23	-130.2	-240,9 to -19,49	Yes	*	0.0176		F value	F (3, 20) = 6,134
												WT-IL23 vs. Mir149EKO-IL23	-50.37	-161,1 to 60,35	No	ns	0.5896		Degrees of Freedom	3 (for treatment groups), 20 (for residual/error)
		Il-22											t value	Degrees of Freedom	Below threshold?	Summary	P value		Two-tailed Unpaired t test
		conditions/n	1	2	3	4	5	6	7	8		WT-PBS vs. WT-IL23	2.372	10	Yes	*	0,0392		t value and Degrees of Freedom	t=2,372, df=10
		WT-PBS	204.254	2061.26	2776.56	1566.02	7562,930615*	1985.63	1624.35
		Mir149EKO-PBS	1693.57	1654.08	2423.33	1000.83	729.951	753.533	1957.72			Tukey's multiple comparisons test	Mean Diff,	95,00% CI of diff,	Below threshold?	Summary	Adjusted P Value		One-way ANOVA
		WT-IL23	3097.94	4426.22	5900	3623.52	219,1797557*	1016,300431*	1521.94	2116.93		WT-PBS vs. Mir149EKO-PBS	244	-1542 to 2030	No	ns	0.9807		P value	P=0,0037
		Mir149EKO-IL23	4667.62	5510.31	817,8583277*	2755.94	2700.83	2006.39	1196,896494*	4122.38		Mir149EKO-PBS vs. Mir149EKO-IL23	-2168	-3955 to -381,9	Yes	*	0.0138		F value	F (3, 21) = 6,131
												WT-IL23 vs. Mir149EKO-IL23	-179.5	-2033 to 1674	No	ns	0.9929		Degrees of Freedom	3 (for treatment groups), 21 (for residual/error)

## Sheet: Figure 5
	Fig.5f	Normalized Proportion of keratinocytes
																t value	Degrees of Freedom	Below threshold?	Summary	P value		Two-tailed Unpaired t test
			n/Clusters	MIX (Fib)	Seb-Gland	Supra-Diff	uHF	Cycling	HF-Ana	Act-Bas	Act-Diff	Diff	Bas	Bas	Mir149EKO-IL-23 vs. WT-IL-23	3.095	4	Yes	*	0,0364		t value and Degrees of Freedom	t=3,095, df=4
		Mir149EKO+IL-23	1	1.06406	2.19196	4.68185	5.34156	5.38412	5.42669	11.5131	17.7485	22.3665	24.2818		WT-IL23 vs. WT-PBS	9.422	4	Yes	***	0,0007		t value and Degrees of Freedom	t=9,422, df=4
			2	1.18871	1.06984	4.42793	5.3789	8.2318	5.85438	10.627	14.205	24.6568	24.3596									Two-tailed Unpaired t test
			3	3.41163	0.810962	4.61409	5.22931	7.21476	6.76644	9.00537	24.7483	19.547	18.6521	Diff	Mir149EKO-IL-23 vs. WT-IL-23	0.2583	4	No	ns	0,8089		t value and Degrees of Freedom	t=0.2583, df=4
		WT+IL-23	1	0.39086	1.50331	4.81058	4.38966	5.5021	6.13349	7.06554	23.4095	29.2544	17.5406		WT-IL23 vs. WT-PBS	1.113	4	No	ns	0,3280		t value and Degrees of Freedom	t=1.113, df=4
			2	2.27033	0.31679	4.35586	4.77825	5.46462	5.72862	7.52376	35.0053	18.7698	15.7867									Two-tailed Unpaired t test
			3	1.22714	1.93868	6.13165	8.65645	4.05771	10.7894	8.22696	29.982	15.0586	13.9315	Act-Diff	Mir149EKO-IL-23 vs. WT-IL-23	2.313	4	No	ns	0,0818		t value and Degrees of Freedom	t=2.313, df=4
		WT+PBS	1	1.01998	2.12323	4.12157	5.32889	4.89176	6.34888	5.44796	13.6553	23.816	33.2465		WT-IL23 vs. WT-PBS	4.88	4	Yes	**	0,0082		t value and Degrees of Freedom	t=4.880, df=4
			2	1.25299	3.55629	5.54634	3.68528	4.09066	6.26497	5.71218	4.75402	25.2257	39.9115									Two-tailed Unpaired t test
			3	0.753329	1.17379	4.30974	3.88928	5.76384	6.74492	4.16959	5.48353	29.2397	38.4723	Act-Bas	Mir149EKO-IL-23 vs. WT-IL-23	3.435	4	Yes	*	0,0264		t value and Degrees of Freedom	t=3.435, df=4
															WT-IL23 vs. WT-PBS	4.274	4	Yes	*	0,0129		t value and Degrees of Freedom	t=4.274, df=4
	Fig.5j	Tweak/Tweakr Combined Score from different clusters													Bas			Below threshold?	Summary	P value
															Mir149EKO-IL-23 vs. WT-IL-23			Yes	****	3.38715e-05
		Clusters	Bas-WT-PBS	KC - Bas-WT-IL23	KC - Act_Bas-WT-PBS	KC - Act_Bas-WT-IL23		Clusters		KC - Diff-WT-PBS	KC - Diff-WT-IL23	KC - Act_Diff-WT-PBS	KC - Act_Diff-WT-IL23		WT-IL23 vs. WT-PBS			No	ns	0.955328
		Bas-WT-IL23	0.955328	1	4.47134e-17	9.05628e-07		Bas-WT-IL23		7.46947e-05	0.0257838	3.32459e-24	1.45822e-30		Diff
		Bas-Mir149EKO-IL23	2.37636e-09	3.38715e-05	2.90456e-13	6.69822e-05		Bas-Mir149EKO-IL23		4.44636e-27	3.06322e-10	2.7359e-20	2.41053e-26		Mir149EKO-IL-23 vs. WT-IL-23			Yes	****	2.3436e-12
		Act_Bas-WT-IL23	6.72382e-07	9.05628e-07	0.148063	1		Act_Bas-WT-IL23		7.76286e-09	3.88148e-08	0.000507642	2.0109e-06		WT-IL23 vs. WT-PBS			No	ns	0.415366
		Act_Bas-Mir149EKO-IL23	3.9838e-20	9.89411e-20	0.0219884	0.000851719		Act_Bas-Mir149EKO-IL23		3.17159e-23	6.76663e-22	0.944337	0.196874		Act-Diff
		Diff-WT-IL23	0.0042921	0.0257838	9.63122e-20	3.88148e-08		Diff-WT-IL23		0.415366	1	7.16433e-27	2.05096e-33		Mir149EKO-IL-23 vs. WT-IL-23			No	ns	0.576408
		Diff-Mir149EKO-IL23	1.74725e-12	7.92061e-07	1.76902e-12	0.00015027		Diff-Mir149EKO-IL23		7.85078e-32	2.3436e-12	1.85286e-19	1.95919e-25		WT-IL23 vs. WT-PBS			No	ns	0.148211
		Act_Diff-WT-IL23	2.57316e-31	1.45822e-30	0.000119559	2.0109e-06		Act_Diff-WT-IL23		1.65764e-35	2.05096e-33	0.148211	1		Act-Bas
		Act_Diff-Mir149EKO-IL23	1.67348e-38	3.36658e-37	0.000284949	4.33021e-06		Act_Diff-Mir149EKO-IL23		5.62168e-44	8.49251e-41	0.318628	0.576408		Mir149EKO-IL-23 vs. WT-IL-23			Yes	****	0.000851719
															WT-IL23 vs. WT-PBS			No	ns	0.148063
		Tweak/Tweakr Combined Score from 3 conditions
																		Below threshold?	Summary	P value
		t.test(Tweak_score[genotype_treatment=="Mir149EKO-IL23"], Tweak score[genotype_treatment=="WT-IL23"])													Mir149EKO-IL-23 vs. WT-IL-23			Yes	*	0.0451832
		t.test(Tweak_score[genotype_treatment=="WT-PBS"], Tweak score[genotype_treatment=="WT-IL23"])													WT-IL23 vs. WT-PBS			Yes	****	8.41114e-17

## Sheet: Figure 6
	Fig.6e	Proportion of immune cells within 3 conditions
			n/Clusters	B cell	Baso	FibC	LC	MDSC	MΦ	MGL2+ MΦ/cDC2	WDFY4+ MΦ/DC	MC	NK/ILC	αβ/γδ T	PCLAF+ T	Prolif T	Trm/KC	Th	T17	Treg	CCR7+cDC2
		WT+PBS	1	0.22	0.34	1.23	11.62	4.47	8.32	4.58	0.67	3.58	0.11	28.44	0.89	0.5	12.12	13.35	7.32	1.79	0.45
		WT+IL-23	2	0.283789	1.27705	1.09968	8.47818	7.02377	15.5729	13.48	1.41894	4.89535	0.177368	13.8702	1.17063	0.673998	5.56935	11.7418	7.91061	4.22136	1.13515
		Mir149EKO+IL-23	3	0.129828	0.778968	0.97371	8.47128	5.90717	18.5329	12.431	1.23337	7.72476	0.032457	13.8267	0.876339	0.616683	8.01688	10.4836	6.10191	3.21324	0.64914
	Fig.6f														Below threshold?	Summary	P value	Fold change (FC)		Two-tailed Unpaired t test
		Normalized 3 subsets of MΦ (x103) per donor by total cell number										MΦ		WT-IL23 vs. WT-PBS	No	ns	0,0512	3.9		t value and Degrees of Freedom	t=2,753, df=4
		cluster/conditions	WT+PBS			WT+IL-23			Mir149EKO+IL-23					Mir149EKO-IL-23 vs. WT-IL-23	No	ns	0,8293				t=0,2301, df=4
		MΦ	13.3	3.46	2.94	16.29	23.5	36.8	12.89	26.77	44.48	MGL2+ MΦ/cDC2		WT-IL23 vs. WT-PBS	No	ns	0,1171	6.2			t=1,993, df=4
		MGL2+ MΦ/cDC2	7.32	2	1.53	9.66	17.22	40.44	16.79	17.66	21.83			Mir149EKO-IL-23 vs. WT-IL-23	No	ns	0,7151				t=0,3919, df=4
		WDFY4+ MΦ/DC	1.2	0.27	0.13	1.14	1.61	4.41	2.28	1.09	2.03	WDFY4+ MΦ/DC		WT-IL23 vs. WT-PBS	No	ns	0,1597	4.5			t=1,725, df=4
														Mir149EKO-IL-23 vs. WT-IL-23	No	ns	0,6168				t=0,5417, df=4
		Normalized 6 subsets of T cell (x103) per donor by total cell number													Below threshold?	Summary	P value	Fold change (FC)		Two-tailed Unpaired t test
		cluster/conditions	WT+PBS			WT+IL-23			Mir149EKO+IL-23			αβ/γδ		WT-IL23 vs. WT-PBS	No	ns	0,9814	1		t value and Degrees of Freedom	t=0,02480, df=4
		αβ/γδ	21.15	17.46	28.01	22.54	26.71	17.06	22.29	20.94	19.66	Th		WT-IL23 vs. WT-PBS	No	ns	0,3027	1.8			t=1,182, df=4
		Th	11.17	7.33	12.79	5.3	23.35	27.41	6.72	12.93	27.39	Th17/Tc17		WT-IL23 vs. WT-PBS	No	ns	0,7589	2.3			t=0,3287, df=4
		Th17/Tc17	6.92	7.59	2.81	6.82	11.38	20.89	9.67	3.28	13.29	Treg		WT-IL23 vs. WT-PBS	No	ns	0,0679	5			t=2,484, df=4
		Treg	3.33	0.4	0.51	4.73	5.25	11.12	4.43	3.1	6.64	PCLAF+		WT-IL23 vs. WT-PBS	No	ns	0.4158	2.9			t=0,9068, df=4
		PCLAF+	0.8	0.93	0.38	0.57	0.58	4.98	1.48	0.36	1.9	Prolif		WT-IL23 vs. WT-PBS	No	ns	0,3279	2.6			t=1,113, df=4
		Prolif	0.13	0.4	0.64	0.38	2.04	0.57	0.81	0.73	1.22
	Fig.6g
		Absolute immune cell numbers among 18 clusters
		conditions/cluster	NK/ILC	B cell	Prolif T	CCR7+cDC2	Baso	PCLAF+ T	FibC	WDFY4+ MΦ/DC	Treg	MC	MDSC	T17	Trm/KC	LC	MGL2+ MΦ/cDC2	Th	MΦ	αβ/γδ T
		WT+PBS	2	4	9	8	6	16	22	12	32	64	80	131	217	208	82	239	149	509
		WT+IL-23	5	8	19	32	36	33	31	40	119	138	198	223	157	239	380	331	439	391
		Mir149EKO+IL-23	1	4	19	20	24	27	30	38	99	238	182	188	247	261	383	323	571	426
		Normalized MC (x103) per donor by total cell number
			n/Conditions	WT+PBS	WT+IL-23	Mir149EKO+IL-23									Below threshold?	Summary	P value	Fold change (FC)		Two-tailed Unpaired t test
		MC	1	4.92	4.36	10.74								WT-IL23 vs. WT-PBS	No	ns	0,1522	2.9		t value and Degrees of Freedom	t=1,765, df=4
			2	2.93	6.57	3.28								Mir149EKO-IL-23 vs. WT-IL-23	No	ns	0,6145	1.5			t=0,5453, df=4
			3	0.64	13.42	18.99
	Fig. 6h
		Number of mast cell (Cpa3+) per field
		conditions/n	1	2	3									t value	Degrees of Freedom	Below threshold?	Summary	P value		Two-tailed Unpaired t test
		WT+IL-23	31.5	30.5	31.5								Mir149EKO-IL-23 vs. WT-IL-23	3.937	4	Yes	*	0,0170		t value and Degrees of Freedom	t=3,937, df=4
		Mir149EKO+IL-23	73.25	47	67.8
	Fig.6j	Proportion of selected gene expressed mast cells (%)
			WT+PBS	WT+IL-23	Mir149EKO+IL-23
		Tnfsf12	1.36364	1.36364	3.40909
		Ccl7	7.95455	20	26.3636
		Cd13	0.681818	1.81818	1.36364
		Cd34	0.227273	1.36364	1.36364
		Fcer1a	7.72727	20.9091	32.0455
		Kit	6.36364	12.7273	19.3182

## Sheet: Figure7
	Fig.7b		n/genes	Fcer1g	Srgn	Mcpt4	Tpsb2	Cma1	Cpa3	Hdc
		WT+IMQ	1	132.080510466473*	25.9803	23.1867224380654*	26.2037899360305*	23.6336954007269*	6.369365*	4.91670258927651*			t value	Degrees of Freedom	Below threshold?	Summary	P value			Two-tailed Unpaired t test
			2	21.9168	8.2715	16.4376	8.42956	9.43056	2.21276	0.790271		Fcer1g	3.114	8	Yes	*	0.0143			t value and Degrees of Freedom	t=3,114, df=8
			3	9.13389	8.99337	7.16659	3.72382	3.44277	2.38886	1.40521		Srgn	2.649	8	Yes	*	0.0293				t=2,649, df=8
			4	32.2997	12.8231	26.8559	12.4602	18.6903	5.80668	2.05653		Mcpt4	2.939	8	Yes	*	0.0187				t=2,939, df=8
			5	9.12194	7.89826	6.4521	3.50416	2.78108	1.2793	1.22367		Tpsb2	3.256	8	Yes	*	0.0116				t=3,256, df=8
			6	33.9054	21.9172	18.8282	20.6669	11.4734	4.55995	3.01545		Cma1	4.031	8	Yes	**	0.0038				t=4,031, df=8
		Mir149EKO+IMQ	1	107.434	41.2304	29.1765	27.0748	21.3261	7.54139	8.53043		Cpa3	3.893	8	Yes	**	0.0046				t=3,893, df=8
			2	156.103	74.704	27.2817	25.8312	26.4449	12.8877	11.5084		Hdc	6.035	8	Yes	***	0.0003				t=6,035, df=8
			3	77.6196	18.4052	28.3199	17.0906	22.4587	7.94272	6.57329
			4	56.2053	25.8195	25.916	17.2773	18.4111	7.61282	5.72311
			5	248.564	33.6472	48.5349	32.2839	31.4113	15.1058	9.54338
			6	69.94661*	22.46904*	6.07271270110277*	6.45915805480931*	6.73519045031398*	1.82181381033083*	4.250899*
	Fig.7d	Total scores for erythema, scaling, and skin thickness
			n/Days	1	2	3	4	5
		PBS-Vehicle	1	0	0.5	1.75	3	3
			2	0	0.5	1	2.75	2
			3	0	0.25	1	1.5	2.5
			4	0	0.5	1.75	3.5	1.5
			5	0	0.5	0.05	1.5	1.5
			6	0	0.75	1.5	2	1.5			Tukey's multiple comparisons test	Mean Diff,	95,00% CI of diff,	Below threshold?	Summary	Adjusted P Value
			7	0	0.5	2.25	3.75	4			PBS-Vehicle vs. PBS-IMQ	-2.856	-3,707 to -2,005	Yes	****	<0,0001
											PBS-Vehicle vs. Monensin+Vehicle	0.5934	-0,2305 to 1,417	No	ns	0.2446
		PBS-IMQ	1	0	1.5	5.25	8	7.75			PBS-IMQ vs. Monensin+IMQ	0.9616	0,1378 to 1,785	Yes	*	0.015
			2	0	1.5	3.75	7.25	8.25			Monensin+Vehicle vs. Monensin+IMQ	-2.488	-3,283 to -1,692	Yes	****	<0,0001
			3	0	3	5	7.25	8.5										Two-way ANOVA (Treatment)
			4	0	1.25	4.25	7	8.75			ANOVA table	SS (Type III)	DF	MS	F (DFn, DFd)	P value		P value	<0.0001
			5	0	1	2.75	5.75	7			Days	446.4	4	111.6	F (4, 142) = 59,53	P<0,0001		F value	F (3, 142) = 51,39
			6	0	1.5	4.5	8	8.5			Treatment	289	3	96.35	F (3, 142) = 51,39	P<0,0001		Degrees of Freedom	3 (for treatment groups), 142 (for residual/error)
			7	0	1.5	4	6.25	7.75			Residual	266.2	142	1.875
		Monensin+Vehicle	1	0	0.5	1	1	0.5
			2	0	1	1.5	1	1
			3	0	1.25	1.25	1.5	1
			4	0	1	1	1.75	0.5
			5	0	0	0.5	1.5	1.5
			6	0	1	1.25	1	0.5
			7	0	0	0.5	1.25	1
			8	0	0.75	0.5	1	0.75
		Monensin+IMQ	1	0	1	1	4	6.25
			2	0	1	4.5	7.75	7.75
			3	0	1	1.75	4.75	6
			4	0	0.5	1.25	3.5	6
			5	0	0.5	2.75	4.5	6.25
			6	0	1.25	4.25	6.75	7.5
			7	0	0.75	2.75	6	7.5
			8	0	1.75	4.75	6.25	7.75
	Fig.7f
		S100a9
		conditions/n	1	2	3	4	5	6	7	8	Tukey's multiple comparisons test	Mean Diff,	95,00% CI of diff,	Below threshold?	Summary	Adjusted P Value			One-way ANOVA
		PBS-Vehicle	10.9	4.5	10.8	23.2	6.2	38.6	2.1		Veh_PBS vs. Veh_Mon	0.5696	-7870 to 7871	No	ns	>0,9999			P value	P<0,0001
		Monensin+Vehicle	4.2	3.3	32.3	1.7	1.4	3.9	37.1	21.6	Veh_PBS vs. IMQ_PBS	-16652	-24781 to -8523	Yes	****	<0,0001			F value	F (3, 25) = 14,83
		PBS-IMQ	3006.7	12809.3	20886.1	9961.2	19317.4	15784.9	34896.2		Veh_Mon vs. IMQ_Mon	-7926	-15797 to -54,95	Yes	*	0.048			Degrees of Freedom	3 (for treatment groups), 25 (for residual/error)
		Monensin+IMQ	6403.7	2834.6	15628.7	7911.3	2091.8	6713.2	13989.7	26233,8*	IMQ_PBS vs. IMQ_Mon	8727	598,0 to 16856	Yes	*	0.0321
		Il1b
		conditions/n	1	2	3	4	5	6	7	8	Tukey's multiple comparisons test	Mean Diff,	95,00% CI of diff,	Below threshold?	Summary	Adjusted P Value			One-way ANOVA
		PBS-Vehicle	1.1	0.2	0.3	0.2	0.2	0.5	0.1		Veh_PBS vs. Veh_Mon	-0.2286	-39,88 to 39,42	No	ns	>0,9999			P value	P<0,0001
		Monensin+Vehicle	0.3	0.8	0.8	0	0.1	1.3	1.2	0.3	Veh_PBS vs. IMQ_PBS	-96.47	-137,4 to -55,52	Yes	****	<0,0001			F value	F (3, 25) = 19,94
		PBS-IMQ	13.1	171.8	119.6	65.2	152.3	59.3	96.6		Veh_Mon vs. IMQ_Mon	-10.73	-50,38 to 28,92	No	ns	0.8782			Degrees of Freedom	3 (for treatment groups), 25 (for residual/error)
		Monensin+IMQ	5.3	2.5	13.8	5.1	3.5	15	34.1	110,7*	IMQ_PBS vs. IMQ_Mon	85.51	44,57 to 126,5	Yes	****	<0,0001
		Ccl2
		conditions/n	1	2	3	4	5	6	7	8	Tukey's multiple comparisons test	Mean Diff,	95,00% CI of diff,	Below threshold?	Summary	Adjusted P Value			One-way ANOVA
		PBS-Vehicle	13*	1.6	0.8	1.2	2.5	0.7	0.6		Veh_PBS vs. Veh_Mon	-0.7292	-6,046 to 4,587	No	ns	0.9809			P value	P<0,0001
		Monensin+Vehicle	0.9	4.1	2.7	0.3	1.2	2.3	2.1	2.1	Veh_PBS vs. IMQ_PBS	-15.12	-20,80 to -9,433	Yes	****	<0,0001			F value	F (3, 23) = 26,31
		PBS-IMQ	13.1	21	10.1	6,1*	21.7	13.5	18.7		Veh_Mon vs. IMQ_Mon	-8.252	-13,35 to -3,157	Yes	***	0.0009			Degrees of Freedom	3 (for treatment groups), 23 (for residual/error)
		Monensin+IMQ	14.3	4.7	12.9	7.9	5.7	7.1	18.9	20,7*	IMQ_PBS vs. IMQ_Mon	6.136	0,6589 to 11,61	Yes	*	0.0242
		Il17a
		conditions/n	1	2	3	4	5	6	7	8	Tukey's multiple comparisons test	Mean Diff,	95,00% CI of diff,	Below threshold?	Summary	Adjusted P Value			One-way ANOVA
		PBS-Vehicle	0.026	0.003	0.003	0.005	0.088	0.002	0.001		Veh_PBS vs. Veh_Mon	0.01429	-0,2097 to 0,2383	No	ns	0.998			P value	P=0,0005
		Monensin+Vehicle	0.009	0.003	0,216*	0.001	0.005	0.003	0.002	0.005	Veh_PBS vs. IMQ_PBS	-0.3367	-0,5607 to -0,1127	Yes	**	0.0019			F value	F (3, 24) = 8,440
		PBS-IMQ	0.013	0.153	0.265	0.181	0.341	0.842	0.69		Veh_Mon vs. IMQ_Mon	-0.04386	-0,2679 to 0,1801	No	ns	0.9483			Degrees of Freedom	3 (for treatment groups), 24 (for residual/error)
		Monensin+IMQ	0.027	0.059	0,306*	0.069	0.02	0.059	0.056	0.045	IMQ_PBS vs. IMQ_Mon	0.3071	0,08314 to 0,5311	Yes	**	0.0047

## Sheet: Figure8
	Fig. 8b
		n/Days	1	2	3	4	5	6	7	8	9	10	11	12	13	14	Tukey's multiple comparisons test	Mean Diff,	95,00% CI of diff,	Below threshold?	Summary	Adjusted P Value
	WT+IL-23+Anti-Tweak	1	0.2	0.24	0.26	0.27	0.32	0.32	0.35	0.42	0.41	0.48	0.5	0.53	0.49	0.53	WT+IL-23+Anti-Tweak vs. Mir149EKO+IL-23+Anti-Tweak	0.0003423	-0,01811 to 0,01879	No	ns	>0,9999
		2	0.2	0.23	0.25	0.3	0.33	0.35	0.39	0.4	0.41	0.49	0.46	0.46	0.5	0.53	WT+IL-23+Anti-Tweak vs. WT+IL-23+Anti-Ctrl	-0.01006	-0,02978 to 0,009666	No	ns	0.6903
		3	0.225	0.24	0.25	0.28	0.3	0.31	0.32	0.34	0.41	0.46	0.47	0.47	0.48	0.51	Mir149EKO+IL-23+Anti-Tweak vs. Mir149EKO-IL-23+Anti-Ctrl	-0.04469	-0,06177 to -0,02761	Yes	****	<0,0001
		4	0.21	0.24	0.26	0.27	0.33	0.34	0.36	0.41	0.38	0.46	0.46	0.5	0.5	0.53	Mir149EKO+IL-23+Anti-Tweak vs. Mir149EKO-PBS	0.1307	0,1090 to 0,1523	Yes	****	<0,0001
		5	0.21	0.25	0.27	0.29	0.3	0.34	0.34	0.4	0.44	0.43	0.47	0.48	0.49	0.5	WT+IL-23+Anti-Ctrl vs. Mir149EKO-IL-23+Anti-Ctrl	-0.03429	-0,05274 to -0,01583	Yes	****	<0,0001
		6	0.21	0.23	0.25	0.26	0.3	0.33	0.38	0.41	0.44	0.44	0.47	0.47	0.48	0.53	Mir149EKO-IL-23+Anti-Ctrl vs. Mir149EKO-PBS	0.1754	0,1537 to 0,1970	Yes	****	<0,0001
																	WT-PBS vs. Mir149EKO-PBS	-0.01016	-0,03849 to 0,01817	No	ns	0.909
																	WT+IL-23+Anti-Ctrl vs. WT-PBS	0.1512	0,1241 to 0,1784	Yes	****	<0,0001
	Mir149EKO+IL-23+Anti-Tweak	1	0.22	0.25	0.28	0.31	0.35	0.35	0.38	0.43	0.43	0.47	0.47	0.49	0.5	0.52
		2	0.2	0.25	0.26	0.28	0.33	0.33	0.39	0.4	0.39	0.44	0.47	0.49	0.49	0.5	ANOVA table	SS	DF	MS	F (DFn, DFd)	P value
		3	0.23	0.26	0.26	0.28	0.3	0.31	0.33	0.37	0.4	0.43	0.46	0.47	0.47	0.52	Days	3.704	13	0.2849	F (13, 461) = 142,8	P<0,0001
		4	0.2	0.225	0.26	0.28	0.32	0.33	0.38	0.38	0.41	0.46	0.47	0.48	0.51	0.53	Conditions	1.557	5	0.3114	F (5, 461) = 156,1	P<0,0001
		5	0.22	0.25	0.27	0.28	0.3	0.33	0.36	0.36	0.36	0.42	0.46	0.49	0.49	0.5	Residual	0.9199	461	0.001995
		6	0.2	0.26	0.26	0.31	0.32	0.35	0.34	0.4	0.45	0.5	0.49	0.52	0.52	0.57
		7	0.19	0.24	0.26	0.29	0.3	0.3	0.35	0.34	0.38	0.45	0.41	0.47	0.46	0.5		Two-way ANOVA (Condition)
		8	0.2	0.25	0.26	0.3	0.32	0.36	0.36	0.38	0.4	0.47	0.47	0.49	0.48	0.5		P value	<0.0001
	WT+IL-23+Anti-Ctrl	1	0.19	0.24	0.26	0.29	0.36	0.35	0.39	0.4	0.44	0.47	0.5	0.54	0.56	0.56		F value	F (5, 461) = 156,1
		2	0.2	0.23	0.25	0.32	0.35	0.37	0.4	0.42	0.45	0.5	0.5	0.5	0.52	0.53		Degrees of Freedom	5 (for treatment groups), 461 (for residual/error)
		3	0.21	0.24	0.24	0.3	0.35	0.35	0.36	0.37	0.45	0.48	0.48	0.48	0.48	0.51
		4	0.22	0.25	0.27	0.25	0.34	0.36	0.35	0.36	0.44	0.47	0.48	0.47	0.47	0.54
		5	0.19	0.25	0.25	0.31	0.34	0.35	0.39	0.42	0.42	0.49	0.49	0.5	0.5	0.53
		6	0.21	0.23	0.25	0.28	0.32	0.34	0.34	0.36	0.39	0.43	0.47	0.48	0.49	0.51	Mir149EKO+IL-23+Anti-Tweak vs.Mir149EKO-IL-23+Anti-Ctrl
																	Two-tailed Unpaired t test	t value and Degrees of Freedom		Below threshold?	Summary	P value
																	Day1	t=0,5804, df=14		No	ns	0.5709
	Mir149EKO-IL-23+Anti-Ctrl	1	0.21	0.26	0.29	0.33	0.37	0.38	0.39	0.42	0.47	0.51	0.54	0.6	0.61	0.62	Day2	t=0,3406, df=14		No	ns	0.7384
		2	0.22	0.24	0.26	0.36	0.38	0.4	0.44	0.45	0.48	0.49	0.55	0.59	0.61	0.59	Day3	t=1,371, df=14		No	ns	0.1918
		3	0.22	0.26	0.26	0.29	0.36	0.34	0.37	0.4	0.46	0.5	0.53	0.6	0.58	0.58	Day4	t=2,853, df=14		Yes	*	0.0128
		4	0.19	0.23	0.26	0.3	0.38	0.4	0.45	0.44	0.49	0.49	0.5	0.52	0.56	0.6	Day5	t=4,816, df=14		Yes	***	0.0003
		5	0.2	0.25	0.28	0.3	0.39	0.4	0.41	0.43	0.43	0.48	0.5	0.53	0.56	0.56	Day6	t=3,931, df=14		Yes	**	0.0015
		6	0.19	0.25	0.29	0.35	0.35	0.36	0.42	0.44	0.49	0.52	0.54	0.6	0.6	0.66	Day7	t=3,421, df=14		Yes	**	0.0041
		7	0.2	0.25	0.27	0.31	0.32	0.35	0.36	0.37	0.43	0.48	0.48	0.51	0.53	0.57	Day8	t=3,036, df=14		Yes	**	0.0089
		8	0.2	0.26	0.26	0.32	0.38	0.38	0.42	0.44	0.47	0.52	0.54	0.58	0.58	0.58	Day9	t=4,786, df=14		Yes	***	0.0003
	WT-PBS	1	0.21		0.23		0.23		0.24		0.244		0.246		0.245	0.26	Day10	t=4,065, df=14		Yes	**	0.0012
		2	0.22		0.23		0.24		0.23		0.23		0.24		0.242	0.24	Day11	t=4,928, df=14		Yes	***	0.0002
		3	0.23		0.25		0.23		0.255		0.245		0.246		0.248	0.25	Day12	t=5,263, df=14		Yes	***	0.0001
		4	0.22		0.24		0.24		0.238		0.243		0.243		0.245	0.24	Day13	t=7,295, df=14		Yes	****	<0,0001
																	Day14	t=5,444, df=14		Yes	****	<0,0001
	Mir149EKO-PBS	1	0.23		0.24		0.24		0.243		0.245		0.26		0.258	0.258
		2	0.22		0.23		0.24		0.245		0.25		0.25		0.253	0.25
		3	0.23		0.24		0.25		0.27		0.27		0.26		0.255	0.263
		4	0.23		0.25		0.25		0.265		0.253		0.25		0.255	0.288
		5	0.22		0.24		0.24		0.256		0.243		0.254		0.268	0.26
		6	0.23		0.26		0.25		0.258		0.253		0.253		0.243	0.255
		7	0.22		0.24		0.23		0.262		0.235		0.265		0.268	0.245
	Fig.8c
		Epidermis thickness
		conditions/n	1	2	3	4	5	6	7	8		One-way ANOVA					Tukey's multiple comparisons test	Mean Diff,	95,00% CI of diff,	Below threshold?	Summary	Adjusted P Value
		WT+Anti-Ctrl	35.9014	40.5304	45.3794	41.1207	39.4327	38.9215				P value	0,0001				WT+Anti-Ctrl vs. Mir149EKO+Anti-Ctrl	-29.17	-45,95 to -12,39	Yes	***	0.0004
		Mir149EKO+Anti-Ctrl	49.0101	60.0292	68.3171	103.511	67.685	82.4451	71.6583	52.4374		F value	F (3, 23) = 10,87				WT+Anti-Ctrl vs. WT+Anti-Tweak	-2.485	-20,42 to 15,45	No	ns	0.9804
		WT+Anti-Tweak	52.1942	46.7353	48.8593	31.5225	42.2759	34.6077				Degrees of Freedom	3 (for treatment groups), 23 (for residual/error)				Mir149EKO+Anti-Ctrl vs. Mir149EKO+Anti-Tweak	24.92	8,841 to 41,00	Yes	**	0.0015
		Mir149EKO+Anti-Tweak	33.3616	43.0065	44.2029	50.62	36.1606	47.7048	56.215	62.3235*							WT+Anti-Tweak vs. Mir149EKO+Anti-Tweak	-1.768	-19,05 to 15,52	No	ns	0.9919
	Fig.8d
		Ki67 positive cells per 50 basal cells
		conditions/n	1	2	3	4						One-way ANOVA					Tukey's multiple comparisons test	Mean Diff,	95,00% CI of diff,	Below threshold?	Summary	Adjusted P Value
		WT+Anti-Ctrl	8.9	15.4	18.5	15.1						P value	P=0,0062				WT+Anti-Ctrl vs. Mir149EKO+Anti-Ctrl	-16.8	-29,39 to -4,212	Yes	**	0.0088
		Mir149EKO+Anti-Ctrl	29.6	19.6	41.3	34.6						F value	F (3, 12) = 6,803				WT+Anti-Ctrl vs. WT+Anti-Tweak	-2.1	-14,69 to 10,49	No	ns	0.9586
		WT+Anti-Tweak	16.9	11.5	24.6	13.3						Degrees of Freedom	3 (for treatment groups), 18 (for residual/error)				Mir149EKO+Anti-Ctrl vs. Mir149EKO+Anti-Tweak	15.1	2,512 to 27,69	Yes	*	0.0178
		Mir149EKO+Anti-Tweak	16.4	16.2	20	12.1											WT+Anti-Tweak vs. Mir149EKO+Anti-Tweak	0.4	-12,19 to 12,99	No	ns	0.9997
	Fig.8f
		CD45+										Two-tailed Unpaired t test						t value	Degrees of Freedom	Below threshold?	Summary	P value
		conditions/n	1	2	3	4						t value and Degrees of Freedom	t=2,950, df=6				WT+Anti-Ctrl vs. WT+Anti-Tweak	2.95	6	Yes	*	0,0256
		WT+Anti-Ctrl	476	341	329	382
		WT+Anti-Tweak	335	205	206	248.667						One-way ANOVA					Tukey's multiple comparisons test	Mean Diff,	95,00% CI of diff,	Below threshold?	Summary	Adjusted P Value
		Mir149EKO+Anti-Ctrl	501	627	684	604						P value	P=0,0004				WT+Anti-Ctrl vs. Mir149EKO+Anti-Ctrl	-222	-390,0 to -54,01	Yes	**	0.0094
		Mir149EKO+Anti-Tweak	358	368	408	589						F value	F (3, 12) = 13,48				WT+Anti-Tweak vs. Mir149EKO+Anti-Tweak	-182.1	-350,1 to -14,10	Yes	*	0.0324
												Degrees of Freedom	3 (for treatment groups), 12 (for residual/error)				Mir149EKO+Anti-Ctrl vs. Mir149EKO+Anti-Tweak	173.3	5,265 to 341,2	Yes	*	0.0426
		CD3+										Two-tailed Unpaired t test						t value	Degrees of Freedom	Below threshold?	Summary	P value
		conditions/n	1	2	3	4						t value and Degrees of Freedom	t=2,036, df=6				WT+Anti-Ctrl vs. Mir149EKO+Anti-Ctrl	2.036	6	No	ns	0,0879
		WT+Anti-Ctrl	26	16.5	17.67	13.7							t=2,117, df=6				WT+Anti-Tweak vs. Mir149EKO+Anti-Tweak	2.117	6	No	ns	0,0786
		WT+Anti-Tweak	19.25	19.75	16.25	12						One-way ANOVA
		Mir149EKO+Anti-Ctrl	24.3	26	22.3	23.7						P value	P<0,0001				Tukey's multiple comparisons test	Mean Diff,	95,00% CI of diff,	Below threshold?	Summary	Adjusted P Value
		Mir149EKO+Anti-Tweak	31.7	28.5	26.3	15						F value	F (3, 12) = 2,918				WT+Anti-Ctrl vs. WT+Anti-Tweak	1.655	-8,618 to 11,93	No	ns	0.9625
												Degrees of Freedom	3 (for treatment groups), 12 (for residual/error)				Mir149EKO+Anti-Ctrl vs. Mir149EKO+Anti-Tweak	-1.3	-11,57 to 8,973	No	ns	0.9811
		F4/80+										Two-tailed Unpaired t test						t value	Degrees of Freedom	Below threshold?	Summary	P value
		conditions/n	1	2	3	4						t value and Degrees of Freedom	t=1,868, df=6				Mir149EKO+Anti-Ctrl vs. Mir149EKO+Anti-Tweak	1.868	6	No	ns	0,1110
		WT+Anti-Ctrl	124	67	95	85
No		WT+Anti-Tweak	107	134	108	91						One-way ANOVA					Tukey's multiple comparisons test	Mean Diff,	95,00% CI of diff,	Below threshold?	Summary	Adjusted P Value
		Mir149EKO+Anti-Ctrl	154	178	156	100						P value	P=0,0002				WT+Anti-Ctrl vs. WT+Anti-Tweak	-17.25	-66,60 to 32,10	No	ns	0.7314
		Mir149EKO+Anti-Tweak	100	132	118	102						F value	F (3, 20) = 10,76				WT+Anti-Ctrl vs. Mir149EKO+Anti-Ctrl	-54.25	-103,6 to -4,902	Yes	*	0.0299
												Degrees of Freedom	3 (for treatment groups), 20 (for residual/error)				WT+Anti-Tweak vs. Mir149EKO+Anti-Tweak	-3	-52,35 to 46,35	No	ns	0.9978
		CPA3+										Two-tailed Unpaired t test						t value	Degrees of Freedom	Below threshold?	Summary	P value
		conditions/n	1	2	3	4						t value and Degrees of Freedom	t=4,618, df=6				WT+Anti-Ctrl vs. WT+Anti-Tweak	4.618	6	Yes	**	0,0036
		WT+Anti-Ctrl	31.5	30.5	31.5	27.6667							t=2,444, df=6				WT+Anti-Tweak vs. Mir149EKO+Anti-Tweak	2.444	6	No	ns	0,0502
		WT+Anti-Tweak	15.75	25	19.5	21.5						One-way ANOVA
		Mir149EKO+Anti-Ctrl	73.25	47	67.8	47.8333						P value	P=0,0039				Tukey's multiple comparisons test	Mean Diff,	95,00% CI of diff,	Below threshold?	Summary	Adjusted P Value
		Mir149EKO+Anti-Tweak	43	33.3333	36.25	20						F value	F (3, 20) = 6,134				WT+Anti-Ctrl vs. Mir149EKO+Anti-Ctrl	-28.68	-46,69 to -10,67	Yes	**	0.0024
												Degrees of Freedom	3 (for treatment groups), 20 (for residual/error)				Mir149EKO+Anti-Ctrl vs. Mir149EKO+Anti-Tweak	25.83	7,812 to 43,84	Yes	**	0.0053
		0.2	0.2	0.225	0.21	0.21	0.21			0.22	0.2	0.23	0.2	0.22	0.2	0.19	0.2	0.19	0.2	0.21	0.22	0.19	0.21			0.21	0.22	0.22	0.19	0.2	0.19	0.2	0.2	0.21	0.22	0.23	0.22					0.23	0.22	0.23	0.23	0.22	0.23	0.22
		0.24	0.23	0.24	0.24	0.25	0.23			0.25	0.25	0.26	0.225	0.25	0.26	0.24	0.25	0.24	0.23	0.24	0.25	0.25	0.23			0.26	0.24	0.26	0.23	0.25	0.25	0.25	0.26
		0.26	0.25	0.25	0.26	0.27	0.25			0.28	0.26	0.26	0.26	0.27	0.26	0.26	0.26	0.26	0.25	0.24	0.27	0.25	0.25			0.29	0.26	0.26	0.26	0.28	0.29	0.27	0.26	0.23	0.23	0.25	0.24					0.24	0.23	0.24	0.25	0.24	0.26	0.24
		0.27	0.3	0.28	0.27	0.29	0.26			0.31	0.28	0.28	0.28	0.28	0.31	0.29	0.3	0.29	0.32	0.3	0.25	0.31	0.28			0.33	0.36	0.29	0.3	0.3	0.35	0.31	0.32
		0.32	0.33	0.3	0.33	0.3	0.3			0.35	0.33	0.3	0.32	0.3	0.32	0.3	0.32	0.36	0.35	0.35	0.34	0.34	0.32			0.37	0.38	0.36	0.38	0.39	0.35	0.32	0.38	0.23	0.24	0.23	0.24					0.24	0.24	0.25	0.25	0.24	0.25	0.23
		0.32	0.35	0.31	0.34	0.34	0.33			0.35	0.33	0.31	0.33	0.33	0.35	0.3	0.36	0.35	0.37	0.35	0.36	0.35	0.34			0.38	0.4	0.34	0.4	0.4	0.36	0.35	0.38
		0.35	0.39	0.32	0.36	0.34	0.38			0.38	0.39	0.33	0.38	0.36	0.34	0.35	0.36	0.39	0.4	0.36	0.35	0.39	0.34			0.39	0.44	0.37	0.45	0.41	0.42	0.36	0.42	0.24	0.23	0.255	0.238					0.243	0.245	0.27	0.265	0.256	0.258	0.262
		0.42	0.4	0.34	0.41	0.4	0.41			0.43	0.4	0.37	0.38	0.36	0.4	0.34	0.38	0.4	0.42	0.37	0.36	0.42	0.36			0.42	0.45	0.4	0.44	0.43	0.44	0.37	0.44
		0.41	0.41	0.41	0.38	0.44	0.44			0.43	0.39	0.4	0.41	0.36	0.45	0.38	0.4	0.44	0.45	0.45	0.44	0.42	0.39			0.47	0.48	0.46	0.49	0.43	0.49	0.43	0.47	0.244	0.23	0.245	0.243					0.245	0.25	0.27	0.253	0.243	0.253	0.235
		0.48	0.49	0.46	0.46	0.43	0.44			0.47	0.44	0.43	0.46	0.42	0.5	0.45	0.47	0.47	0.5	0.48	0.47	0.49	0.43			0.51	0.49	0.5	0.49	0.48	0.52	0.48	0.52
		0.5	0.46	0.47	0.46	0.47	0.47			0.47	0.47	0.46	0.47	0.46	0.49	0.41	0.47	0.5	0.5	0.48	0.48	0.49	0.47			0.54	0.55	0.53	0.5	0.5	0.54	0.48	0.54	0.246	0.24	0.246	0.243					0.26	0.25	0.26	0.25	0.254	0.253	0.265
		0.53	0.46	0.47	0.5	0.48	0.47			0.49	0.49	0.47	0.48	0.49	0.52	0.47	0.49	0.54	0.5	0.48	0.47	0.5	0.48			0.6	0.59	0.6	0.52	0.53	0.6	0.51	0.58
		0.49	0.5	0.48	0.5	0.49	0.48			0.5	0.49	0.47	0.51	0.49	0.52	0.46	0.48	0.56	0.52	0.48	0.47	0.5	0.49			0.61	0.61	0.58	0.56	0.56	0.6	0.53	0.58	0.245	0.242	0.248	0.245					0.258	0.253	0.255	0.255	0.268	0.243	0.268
		0.53	0.53	0.51	0.53	0.5	0.53			0.52	0.5	0.52	0.53	0.5	0.57	0.5	0.5	0.56	0.53	0.51	0.54	0.53	0.51			0.62	0.59	0.58	0.6	0.56	0.66	0.57	0.58	0.26	0.24	0.25	0.24					0.258	0.25	0.263	0.288	0.26	0.255	0.245

## Sheet: Figure S1
	Fig.S1d
		miR-149 expression
		conditions/n	1	2	3	4		Tukey's multiple comparisons test					Mean Diff.	95.00% CI of diff.	Below threshold?	Summary	Adjusted P Value		One-way ANOVA
		miR-149fl/fl	114.922	112.963	112.098	111.834		miR-149fl/fl vs. Krt14-Cre+/- -miR-149fl/wt					52.93	49.98 to 55.88	Yes	****	<0.0001		P value	P<0.0001
		Krt14-Cre+/- -miR-149fl/wt	61.9062	61.8762	58.2672	58.0415		miR-149fl/fl vs. Krt14-Cre+/- -miR-149fl/fl					110.8	107.8 to 113.7	Yes	****	<0.0001		F value	F (2. 9) = 5491
		Krt14-Cre+/- -miR-149fl/fl	2.02022	2.60144	2.19286	1.91482		Krt14-Cre+/- -miR-149fl/wt vs. Krt14-Cre+/- -miR-149fl/fl					57.84	54.89 to 60.79	Yes	****	<0.0001		Degrees of Freedom	2 (for treatment groups). 9 (for residual/error)
		Tweakr expression
		conditions/n	1	2	3	4		Tukey's multiple comparisons test					Mean Diff.	95.00% CI of diff.	Below threshold?	Summary	Adjusted P Value		One-way ANOVA
		miR-149fl/fl	108.086	118.254	140.468	98.734		miR-149fl/fl vs. Krt14-Cre+/- -miR-149fl/wt					-37.51	-106.5 to 31.46	No	ns	0.3279		P value	P=0.0004
		Krt14-Cre+/- -miR-149fl/wt	148.876	143.171	126.659	196.892		miR-149fl/fl vs. Krt14-Cre+/- -miR-149fl/fl					-152.5	-221.5 to -83.57	Yes	***	0.0004		F value	F (2. 9) = 20.70
		Krt14-Cre+/- -miR-149fl/fl	277.959	315.487	282.953	199.316		Krt14-Cre+/- -miR-149fl/wt vs. Krt14-Cre+/- -miR-149fl/fl					-115	-184.0 to -46.05	Yes	**	0.0031		Degrees of Freedom	2 (for treatment groups). 9 (for residual/error)
		Il-6 expression
		conditions/n	1	2	3	4		Tukey's multiple comparisons test					Mean Diff.	95.00% CI of diff.	Below threshold?	Summary	Adjusted P Value		One-way ANOVA
		miR-149fl/fl	0.0938703	0.109001	0.108218	0.0915379		miR-149fl/fl vs. Krt14-Cre+/- -miR-149fl/wt					-0.1246	-0.5100 to 0.2608	No	ns	0.6524		P value	P=0.0007
		Krt14-Cre+/- -miR-149fl/wt	0.149623	0.196698	0.314321	0.240214		miR-149fl/fl vs. Krt14-Cre+/- -miR-149fl/fl					-0.7808	-1.166 to -0.3954	Yes	***	0.0008		F value	F (2. 9) = 18.47
		Krt14-Cre+/- -miR-149fl/fl	0.484343	1.27089	0.981787	0.788735		Krt14-Cre+/- -miR-149fl/wt vs. Krt14-Cre+/- -miR-149fl/fl					-0.6562	-1.042 to -0.2708	Yes	**	0.0027		Degrees of Freedom	2 (for treatment groups). 9 (for residual/error)
	Fig.S1f	BMI calculations
			n/Weeks	9	10	11	12	13	14	15	16	17	18	19	20		Tukey's multiple comparisons test	Mean Diff.	95.00% CI of diff.	Below threshold?	Summary	Adjusted P Value
		WT-Male	1	3.01	3.05	3.02	3.41	3.59	3.51	3.62	4.23	3.92	4.15	4.35	4.3		WT-Male vs. Mir149EKO-Male	0.02153	-0.1160 to 0.1591	No	ns	0.9776
			2	2.79	3.2	3.22	3.79	3.64	3.36	3.36	2.7	4.03	3.52	3.53	3.6		WT-Female vs. Mir149EKO-Female	0.08167	-0.05587 to 0.2192	No	ns	0.4181
			3	3.1	3.33	3.34	3.3	3.32	3.13	3.23	4.13	3.85	3.83	3.89	3.9
			4	3.06	3.04	3.18	3.41	3.41	3.47	3.46	3.85	4.52	3.85	4.81	4.9
			5	3.11	3	3.03	3.29	3.31	3.24	3.4	3.93	4.17	3.79	3.51	3.6
			6	3.64	3.27	3.25	3.11	3.19	3.33	3.45	3.53	3.71	4.49	4.45	4.5
		Mir149EKO-Male	1	3	3.27	3.49	3.57	3.61	3.31	3.08	3.53	3.85	3.95	4.35	4.1
			2	3.37	3.13	3.22	3.73	3.35	3.66	3.54	3.7	2.73	2.65	3.5	3.6		ANOVA table	SS (Type III)	DF	MS	F (DFn. DFd)	P value
			3	3.48	3.53	3.49	3.62	3.89	3.59	3.97	3.12	4.29	4.02	3.88	4		Time (weeks)	29.08	11	2.643	F (11. 273) = 25.94	P<0.0001
			4	3.3	3.46	3.53	3.53	3.19	3.3	3.64	3.94	3.52	3.31	3.81	3.9		Groups	37.34	3	12.45	F (3. 273) = 122.1	P<0.0001
			5	2.83	3.47	3.42	3.46	3.58	3.78	3.72	3.33	3.43	3.49	3.69	3.7		Residual	27.82	273	0.1019
			6	2.92	3.4	3.48	3.64	3.84	3.89	4.27	3.62	3.73	3.48	3.59	3.6
		WT-Female	1	2.3657	2.45868	2.50775	2.53616	2.51235	2.6679	3.03086	3.21	3.81	3.45	3.38	3.52
			2	2.5517	2.5594	2.7014	2.6756	2.7074	3.0012	3.2827	2.96	3.24	3.32	3.25	3.24
			3	2.092	2.128	2.246	2.253	2.742	2.915	2.81	2.51	3.61	3.12	2.78	2.68
			4	2.34375	2.36958	2.39024	2.33988	2.3716	2.61358	3.05185	2.98	3.27	2.92	3.05	3.29
			5	2.49383	2.52469	2.59136	2.45432	2.59259	2.75556	2.79506	3.67	3.33	2.77	2.91	3.06
			6	2.45432	2.41	2.42	2.87	2.92	2.93333	3.17531	3.57	3.58	3.67	3.62	4.62
		Mir149EKO-Female	1	2.441	2.447	2.496	2.822	2.716	3.021	3.307	3.16	3.65	3.67	3.34	3.56
			2	2.04933	2.04287	2.21591	2.26756	2.41235	2.7679	3.11605	3.16	3.38	3.44	3.26	3.67
			3	2.0687	2.02608	2.17846	2.36958	2.41111	2.89012	3.1642	3.09	3.75	3.25	3.2	3.21
			4	2.11131	2.14618	2.24432	2.27789	2.39136	2.44444	2.58395	3.08	2.78	2.97	3.02	2.67
			5	2.37037	2.4716	2.38272	2.405	2.4086	2.7037	2.6975	3.16	2.98	2.98	2.83	3.05
			6	2.19753	2.23457	2.852	2.91852	2.284	2.453	2.909	3.48	3.34	3.74	3.24	3.29
	Fig. S1g
			WT						Mir149EKO
		Ptprc	0	0	0	0	0	0	0	0	0	0	0	0
		Cd4	1	0	0	0	0	0	0	0	0	0	0	0
		Cd8a	0	0	0	0	2	0	0	0	0	0	0	0
		Cd8b1	0	0	0	0	0	0	1	1	1	0	0	0
		Cd3d	0	0	0	0	0	0	0	0	0	0	0	0
		Cd3e	0	0	0	0	0	0	0	0	0	0	0	0
		Cd3g	0	0	0	0	0	0	0	0	0	0	0	0
		Cd80	79	46	72	43	48	45	48	48	71	59	53	45
		Cd86	0	0	0	0	0	0	0	0	0	0	0	0
		Cd27	0	0	2	0	1	1	3	2	2	1	0	3
		Foxp3	0	0	0	0	0	1	0	1	0	0	1	1
		Ncr1	0	0	0	0	0	0	0	0	0	0	0	0
		Cd19	1	0	0	0	0	0	0	0	0	0	0	0
		Ms4a1	0	0	0	0	0	0	0	0	0	0	0	0
		Itgam	95	104	100	104	98	99	97	85	73	108	78	93
		Itgax	0	0	0	0	0	0	0	0	0	0	0	0
		Cd207	0	0	0	0	0	0	0	0	0	0	0	0
		Cd14	44	46	63	61	61	47	47	44	52	48	62	52
		Cd68	262	322	313	268	334	335	342	361	316	344	324	327
		Mmp12	21	12	14	19	25	12	16	19	10	11	12	15
		Lyz1	0	0	0	0	0	0	0	0	0	0	0	0
		Lyz2	1	1	0	1	0	0	0	0	0	1	0	0
		Cela1	0	0	1	0	0	0	1	1	0	2	0	0
		Cela2a	0	0	0	0	0	0	0	0	0	0	0	0
		Cela3a	0	0	0	0	0	0	0	0	0	0	0	0
		Ctrc	0	0	0	0	0	0	0	0	0	0	0	0
		Elane	0	0	0	0	0	0	0	0	0	0	0	0
		Vim	13	13	20	8	17	9	19	17	16	20	12	14
		Col1a1	23	47	55	45	120	63	77	81	88	74	33	55
		Col1a2	12	22	26	32	46	26	56	46	46	45	30	23
		Tyrp1	45	45	28	56	41	42	95	105	80	80	76	90
		Dct	26	26	19	41	26	30	50	45	28	39	38	42
		Krt1	3148	3310	2219	3988	3809	4419	4071	4106	2064	3510	2042	3889
		Krt5	491190	514648	488348	490435	458785	461276	479778	443602	438222	475587	433893	444328
		Krt14	304927	336158	308568	328816	309921	311475	326927	309668	283785	325457	286762	291325
		Krt16	60489.6	66482	68045.7	65762.2	65594.4	63354.6	64057.2	62674.8	55344.5	66135.5	59148.2	59503.3
		Krt17	193657	196112	197883	192105	175399	183279	184777	177940	182340	188283	174392	181339
		Krt6a	283353	300785	292408	293668	286675	292948	296477	278928	268172	288390	283312	282732
		Krt6b	13981.7	15090.5	16973.8	13807.3	14607.3	15178.6	13182.8	12719.7	11768.5	15510.1	13861.2	11278.7
		Dsc3	17154	18681	18139	19146	19203	18480	18215	19445	17299	17051	19086	19491
		Dsp	116285	127308	130396	143153	127130	130781	131664	133440	112568	122321	126595	129671
	Fig. S1i
		%	WT						Mir149EKO								t value	Degrees of Freedom	Below threshold?	Summary	P value	Two-tailed Unpaired t test
		G0/G1	16.446	16.846	16.644	16.582	17.166	16.586	16.534	16.828	16.518	16.356	16.414	15.898		G0/G1	1.76	10	No	ns	0.7202	t=1.760. df=10
		S	18.36	16.09	18.65	17.52	14.62	19.37	18.54	16.65	18.05	18.8	18.68	21.39		S	1.301	10	No	ns	0.7622	t=1.301. df=10
		G2/M	65.312	67.128	65.08	65.984	68.304	64.504	65.168	66.68	65.56	64.96	65.056	62.888		G2/M	1.301	10	No	ns	0.7622	t=1.301. df=10

## Sheet: Figure S2
	Fig.S2a	Thickness	n/Days	1	2	3	4	5
		WT-Vehicle	1	0	0	0	0	1
			2	0	0	0.5	0.5	1.5			Tukey's multiple comparisons test	Mean Diff,	95,00% CI of diff,	Below threshold?	Summary	Adjusted P Value
			3	0	0	0	0.5	1			WT-IMQ vs. Mir149EKO-IMQ	-0.6762	-1,035 to -0,3176	Yes	****	<0,0001
		Mir149EKO-Vehicle	1	0	0	1	1	1.5			WT-IMQ vs. WT-Vehicle	0.5333	0,07751 to 0,9892	Yes	*	0.0151
			2	0	0	0.5	1.5	1.5			Mir149EKO-IMQ vs. Mir149EKO-Vehicle	0.8762	0,4314 to 1,321	Yes	****	<0,0001
			3	0	0	0.5	1	1.5			WT-Vehicle vs. Mir149EKO-Vehicle	-0.3333	-0,8597 to 0,1930	No	ns	0.3517
		WT-IMQ	1	0	0	0.5	1.5	2
			2	0	0	1	2.5	3			ANOVA table	SS (Type III)	DF	MS	F (DFn, DFd)	P value		Two-way ANOVA (Treatment)
			3	0	0	1	1	1.5			Days	84.97	4	21.24	F (4, 87) = 70,15	P<0,0001		P value	<0.0001
			4	0	0	0.5	1	3.5			Treatment	19.18	3	6.394	F (3, 87) = 21,11	P<0,0001		F value	F (3, 87) = 21,11
			5	0	0	0.5	1	1.5			Residual	26.35	87	0.3028				Degrees of Freedom	3 (for treatment groups), 87 (for residual/error)
			6	0	0	0.5	1.5	2
		Mir149EKO-IMQ	1	0	0	1.5	3.5	4
			2	0	0	1.5	3	4
			3	0	0	1.5	3	3
			4	0	0	1	2.5	2.5
			5	0	0	1	2.5	3
			6	0	0	1.5	2.5	4
			7	0	0	2	3.5	3
		Erythema	n/Days	1	2	3	4	5
		WT-Vehicle	1	0	0	0	0	0.25
			2	0	0	0.5	0.25	0			Tukey's multiple comparisons test	Mean Diff,	95,00% CI of diff,	Below threshold?	Summary	Adjusted P Value
			3	0	0	0.25	0.25	0.25			WT-IMQ vs. Mir149EKO-IMQ	-0.07381	-0,2861 to 0,1385	No	ns	0.7993
		Mir149EKO-Vehicle	1	0	0	0.5	0.5	0.5			WT-IMQ vs. WT-Vehicle	0.4667	0,1968 to 0,7365	Yes	***	0.0001
			2	0	0	0	0.5	0.5			Mir149EKO-IMQ vs. Mir149EKO-Vehicle	0.3238	0,06044 to 0,5872	Yes	**	0.0096
			3	0	0	0.5	1	1			WT-Vehicle vs. Mir149EKO-Vehicle	-0.2167	-0,5283 to 0,09495	No	ns	0.2704
		WT-IMQ	1	0	0.5	0.25	1	1
			2	0	0	0	1	1.5			ANOVA table	SS (Type III)	DF	MS	F (DFn, DFd)	P value		Two-way ANOVA (Treatment)
			3	0	0	0.75	0.75	1			Days	14.13	4	3.534	F (4, 87) = 33,29	P<0,0001		P value	<0.0001
			4	0	0.5	0.75	1.5	2			Treatment	3.693	3	1.231	F (3, 87) = 11,60	P<0,0001		F value	F (3, 87) = 11,60
			5	0	0.25	0.5	0.75	0.75			Residual	9.235	87	0.1061				Degrees of Freedom	3 (for treatment groups), 87 (for residual/error)
			6	0	0.5	0.75	0.75	0.75
		Mir149EKO-IMQ	1	0	0	0.25	1.25	1.5
			2	0	0.5	0.5	1.25	2
			3	0	0.5	0.75	1.5	1
			4	0	0.5	0	1	0.5
			5	0	0.25	0.5	1.75	1.5
			6	0	0.5	0.25	0.75	2
			7	0	0	0.5	0.75	1.25
		Scaling	n/Days	1	2	3	4	5
		WT-Vehicle	1	0	0	0	0.25	0.5
			2	0	0	0.25	0.5	0			Tukey's multiple comparisons test	Mean Diff,	95,00% CI of diff,	Below threshold?	Summary	Adjusted P Value
			3	0	0	0.25	0.25	0.5			WT-IMQ vs. Mir149EKO-IMQ	-0.2083	-0,3837 to -0,03293	Yes	*	0.0132
		Mir149EKO-Vehicle	1	0	0	0	0.25	0.5			WT-IMQ vs. WT-Vehicle	0.175	-0,04793 to 0,3979	No	ns	0.1758
			2	0	0	0.25	0.25	0.5			Mir149EKO-IMQ vs. Mir149EKO-Vehicle	0.35	0,1324 to 0,5676	Yes	***	0.0004
			3	0	0	0	0.25	1			WT-Vehicle vs. Mir149EKO-Vehicle	-0.03333	-0,2908 to 0,2241	No	ns	0.9865
		WT-IMQ	1	0	0	0	0.25	1.5
			2	0	0	0.25	0.5	1.5			ANOVA table	SS (Type III)	DF	MS	F (DFn, DFd)	P value		Two-way ANOVA
			3	0	0	0.5	0.5	0.5			Row Factor	17.22	4	4.304	F (4, 87) = 59,42	P<0,0001		P value	<0.0001
			4	0	0	0	0.75	1.5			Column Factor	2.212	3	0.7372	F (3, 87) = 10,18	P<0,0001		F value	F (3, 87) = 10,18
			5	0	0	0	0.5	0.75			Residual	6.302	87	0.07243				Degrees of Freedom	3 (for treatment groups), 87 (for residual/error)
			6	0	0	0	0.5	0.75
		Mir149EKO-IMQ	1	0	0	0.5	0.5	2
			2	0	0	0.25	0.75	1.75
			3	0	0	0.5	1	2
			4	0	0	0.25	0.5	1.75
			5	0	0	0.5	0.75	1.5
			6	0	0	0.25	0.5	1.75
			7	0	0	0.5	0.25	1.5
	Fig.S2b
		BrdU positive cells per field										t value	Degrees of Freedom	Below threshold?	Summary	P value			Two-tailed Unpaired t test
		conditions/n	1	2	3	4	5				WT+Vehicle vs. Mir149EKO+Vehicle	0.02386	4	No	ns	0,9821			t value and Degrees of Freedom	t=0,02386, df=4
		WT+Vehicle	2.3	5.8	5.8						WT+Vehicle vs. WT+IMQ	3.268	6	Yes	*	0.0171			t value and Degrees of Freedom	t=3,268, df=6
		Mir149EKO+Vehicle	4	6.2	3.8														One-way ANOVA
		WT+IMQ	7.7	9.7	10.8	6.7	10.1				Tukey's multiple comparisons test	Mean Diff,	95,00% CI of diff,	Below threshold?	Summary	Adjusted P Value			P value	<0,0001
		Mir149EKO+IMQ	16.2	15.8	20.5	12.8	21.2				Mir149EKO+Vehicle vs. Mir149EKO+IMQ	-12.63	-17,97 to -7,293	Yes	****	<0,0001			F value	F (3, 12) = 29,37
											WT+IMQ vs. Mir149EKO+IMQ	-8.3	-12,92 to -3,675	Yes	***	0.0009			Degrees of Freedom	3 (for treatment groups), 12 (for residual/error)
	Fig.S2c
		miR-149 expression in IMQ model										t value	Degrees of Freedom	Below threshold?	Summary	P value			Two-tailed Unpaired t test
		conditions/n	1	2	3	4	5	6			WT+Vehicle vs. WT+IMQ	2.576	11	Yes	*	0.0258			t value and Degrees of Freedom	t=2,576, df=11
		WT+Vehicle	87.3428	117.219	97.6223	102.379	109.823	91.2306
		WT+IMQ	81.111	96.8318	91.0732	82.2724	60.5365	79.3619
		Correlation of Tweak and miR-149 expression (with extended corhort samples for IMQ model)
			1	2	3	4	5	6	7	8	9	10	11	12
		Mir149	87.3428	117.219	97.6223	102.379	109.823	91.2306	81.111	96.8318	91.0732	82.2724	60.5365	79.3619
		Tweak	5.59545	3.25532	10.0016	0.453012	12.0316	10.6151	25.1428	13.5899	9.36284	11.6452	20.858	2.9114
			13	14	15	16	17	18	19	20	21	22	23	24	25	26	27	28	29	30	31	32
		Mir149	24.4939	87.212	55.6062	61.4891	50.4573	15.1717	75.6285	29.3645	33.7516	28.7154	133.001	120.455	60.3655	53.8058	58.8039	52.5809	85.9142	38.6094	48.8282	49.0485
		Tweak	36.8938	5.69377	6.87716	5.29175	6.29952	16.5972	14.2378	16.947	25.9293	15.3762	13.467	10.3847	16.0834	13.389	5.00441	28.6872	15.4307	36.4628	48.7661	18.6459
	Fig.S2d	The vehicle groups included three mice from new experimental batches for qRT-PCR analysis
		Il-1b										t value	Degrees of Freedom	Below threshold?	Summary	P value			Two-tailed Unpaired t test
		conditions/n	1	2	3	4	5	6	7		WT+Vehicle vs. WT+IMQ	3.143	9	Yes	*	0,0119			t value and Degrees of Freedom	t=3,143, df=9
		WT+Vehicle	2.51801	14,03643028*	0.903393	3.33017	9.17533	2.24489
		Mir149EKO+Vehicle	14.4889	6.24275	17.1164	2.80599	8.69775	2.34078			Tukey's multiple comparisons test	Mean Diff,	95,00% CI of diff,	Below threshold?	Summary	Adjusted P Value			One-way ANOVA
		WT+IMQ	13.6739	19.7411	4.70462	17.5369	12.0938	29.7874			WT+Vehicle vs. Mir149EKO+Vehicle	-4.981	-51,24 to 41,28	No	ns	0.99			P value	0,0017
		Mir149EKO+IMQ	147.899	5.91716	71.9899	4,959761208*	78.982	59.6166	11.7143		Mir149EKO+Vehicle vs. Mir149EKO+IMQ	-54.07	-98,18 to -9,964	Yes	*	0.0132			F value	F (3, 19) = 5,794
											WT+IMQ vs. Mir149EKO+IMQ	-46.43	-90,54 to -2,324	Yes	*	0.037			Degrees of Freedom	3 (for treatment groups), 19 (for residual/error)
		Ccl20
		conditions/n	1	2	3	4	5	6	7		Tukey's multiple comparisons test	Mean Diff,	95,00% CI of diff,	Below threshold?	Summary	Adjusted P Value			One-way ANOVA
		WT+Vehicle	18.7173	19.8414	6.40706	7.05261	6.68281	2.92834			WT+Vehicle vs. Mir149EKO+Vehicle	-0.2506	-11,35 to 10,85	No	ns	>0,9999			P value	P=0,0027
		Mir149EKO+Vehicle	9.9363	12.7815	3.57536	19.0136	10.8585	6.96787			WT+Vehicle vs. WT+IMQ	-13.68	-25,32 to -2,046	Yes	*	0.0178			F value	F (3, 19) = 6,796
		WT+IMQ	32.1698	24.9208	17.2942	219,2730821*	16.1618	29.2343			Mir149EKO+Vehicle vs. Mir149EKO+IMQ	-12.14	-23,23 to -1,039	Yes	*	0.0291			Degrees of Freedom	3 (for treatment groups), 19 (for residual/error)
		Mir149EKO+IMQ	12.3624	6,473851306*	27.1109	33.7302	25.764	18.6281	18.356		WT+IMQ vs. Mir149EKO+IMQ	1.298	-10,34 to 12,94	No	ns	0.989
		Il1f9
		conditions/n	1	2	3	4	5	6	7		Tukey's multiple comparisons test	Mean Diff,	95,00% CI of diff,	Below threshold?	Summary	Adjusted P Value			One-way ANOVA
		WT+Vehicle	175.179	29.7321	165.959	273.852	242.726	40.9707			WT+Vehicle vs. Mir149EKO+Vehicle	-4.297	-201,0 to 192,4	No	ns	>0,9999			P value	P=0,0029
		Mir149EKO+Vehicle	153.513	155.724	139.814	89.1932	227.197	188.759			WT+Vehicle vs. WT+IMQ	-229.7	-436,0 to -23,47	Yes	*	0.0258			F value	F (3, 19) = 6,688
		WT+IMQ	447.629	330.719	160.338	544.101	157.6779206*	439.571			Mir149EKO+Vehicle vs. Mir149EKO+IMQ	-223.4	-420,1 to -26,74	Yes	*	0.0226			Degrees of Freedom	3 (for treatment groups), 19 (for residual/error)
		Mir149EKO+IMQ	264.344	200.188	397.581	188.051	635.448	497.07	300.01		WT+IMQ vs. Mir149EKO+IMQ	2.031	-204,2 to 208,3	No	ns	>0,9999
		Il-6										t value	Degrees of Freedom	Below threshold?	Summary	P value			Two-tailed Unpaired t test
		conditions/n	1	2	3	4	5	6	7		WT+Vehicle vs. Mir149EKO+Vehicle	3.724	8	Yes	**	0,0058			t value and Degrees of Freedom	t=3,724, df=8
		WT+Vehicle	0.32632	0.527661	0.126867	0.490445	0.852716	1,334694825*
		Mir149EKO+Vehicle	1.10437	0.812826	0.856943	0.956318	0,452802823*	1.16023			Tukey's multiple comparisons test	Mean Diff,	95,00% CI of diff,	Below threshold?	Summary	Adjusted P Value			One-way ANOVA
		WT+IMQ	2.03313	1.23037	1.07463	0.982037	1.69815	0,577201871*			WT+Vehicle vs. WT+IMQ	-0.9389	-1,776 to -0,1013	Yes	*	0.0252			P value	P<0,0001
		Mir149EKO+IMQ	2.25924	2.69046	2.67161	1.03284	1.77318	2.90917	0,907312174*		Mir149EKO+Vehicle vs. Mir149EKO+IMQ	-1.245	-2,047 to -0,4427	Yes	**	0.002			F value	F (3, 17) = 14,08
											WT+IMQ vs. Mir149EKO+IMQ	-0.8191	-1,621 to -0,01718	Yes	*	0.0444			Degrees of Freedom	3 (for treatment groups), 17 (for residual/error)
	Fig.S2f	The vehicle groups included three mice from new experimental batches for qRT-PCR analysis
		Tweak										t value	Degrees of Freedom	Below threshold?	Summary	P value			Two-tailed Unpaired t test
		conditions/n	1	2	3	4	5	6	7		WT+Vehicle vs. Mir149EKO+Vehicle	2.221	10	No	ns	0,0506			t value and Degrees of Freedom	t=2,221, df=10
		WT+Vehicle	31.7248	38.0145	34.6095	16.425	37.7446	48.8972
		Mir149EKO+Vehicle	69.4056	63.2372	51.9282	29.9187	42.1357	47.7087			Tukey's multiple comparisons test	Mean Diff,	95,00% CI of diff,	Below threshold?	Summary	Adjusted P Value			One-way ANOVA
		WT+IMQ	53.1952	74.8115	61.0644	47.565	74.7724	48.2803			WT+Vehicle vs. WT+IMQ	-25.38	-44,48 to -6,274	Yes	**	0.0067			P value	P<0,0001
		Mir149EKO+IMQ	80.166	86.8274	88.359	71.0821	83.0342	93.7716	65.4652		Mir149EKO+Vehicle vs. Mir149EKO+IMQ	-30.52	-48,93 to -12,11	Yes	***	0.0008			F value	F (3, 21) = 17,53
											WT+IMQ vs. Mir149EKO+IMQ	-21.3	-39,71 to -2,886	Yes	*	0.0196			Degrees of Freedom	3 (for treatment groups), 21 (for residual/error)

[truncated: 2 more sheets: Figure S4, Figure S5]
