# Supplementary material for: Loss of epidermal microRNA-149 sensitizes to skin inflammation
Source: Research Square preprint supplement (doi:10.21203/rs.3.rs-6047392/v1), 2025-07-29
Supplement: Supplementary file 6 [file a87d2d0c4bfab799522ccd26.xlsx]

## Sheet: DEGs_miR149EKOvsWT_KCs_77up
Genes	LogFC	logCPM	LR	PValue	FDR
Fyb	6.08276	1.53035	699.265	4.31962e-154	5.27642e-150
Fsbp	1.49067	0.0943398	13.246	0.000273167	0.0196279
Tyrp1	1.04471	1.91252	63.1167	1.94812e-15	7.93211e-12
H1f5	0.943341	0.10754	17.52	2.84298e-05	0.00378473
Pmel	0.908966	1.41324	32.1908	1.39751e-08	8.98449e-06
Adamts3	0.838586	0.896114	16.2157	5.6525e-05	0.0062203
Xlr3b	0.779003	0.041608	13.2464	0.0002731	0.0196279
Sh3rf3	0.696412	0.343191	11.429	0.000723084	0.0378538
Thy1	0.644848	0.87781	15.6421	7.65335e-05	0.00799023
Pgm5	0.633414	2.39312	11.8396	0.000579837	0.0323533
Cxcl10	0.631661	1.00402	16.5258	4.79919e-05	0.00542798
Gm10406	0.623779	1.44242	18.7116	1.52058e-05	0.00244392
Gapdhs	0.609688	1.09812	13.1568	0.000286476	0.0201109
Gpsm1	0.589842	1.66517	14.7731	0.000121253	0.0112205
Nrg2	0.58433	2.34726	22.2011	2.45527e-06	0.000576752
Fam129c	0.558312	1.3273	13.1719	0.000284172	0.0201109
Inha	0.541849	1.66338	13.721	0.000212074	0.0166057
LOC115490345	0.532476	1.5668	17.3904	3.0436e-05	0.00387266
Slc8a1	0.532203	2.14618	19.9864	7.79957e-06	0.00148862
Rasgrf2	0.521465	2.39435	17.4944	2.88154e-05	0.00378473
Nxph3	0.520952	2.21158	26.8212	2.23176e-07	9.08698e-05
Speg	0.517928	1.58011	16.5329	4.78134e-05	0.00542798
Celf5	0.512695	1.11993	11.401	0.000734034	0.0381542
Sdk1	0.483285	2.40581	21.6202	3.32341e-06	0.000724918
Tmem81	0.468544	1.52503	13.2864	0.000267345	0.0194382
Slc7a8	0.464113	4.69218	32.0833	1.47699e-08	9.02072e-06
Ucn2	0.454007	3.38087	19.8557	8.35139e-06	0.00150018
Sned1	0.451467	2.31941	16.616	4.57643e-05	0.00527369
Fhl1	0.434032	7.20861	40.0716	2.44821e-10	4.98415e-07
Klhl23	0.425654	2.32069	15.7744	7.1362e-05	0.00764638
Skint7	0.417481	2.47933	14.6737	0.000127819	0.0116516
Klk11	0.413951	2.90354	23.4444	1.28574e-06	0.000334155
Rhof	0.413813	2.96593	15.0949	0.000102241	0.00977481
Dbn1	0.408869	3.61439	26.1059	3.232e-07	0.000123371
Gjb6	0.40754	3.13095	12.2324	0.000469658	0.0285416
Igfbp2	0.398379	8.47097	18.8797	1.39228e-05	0.00228491
Aoc2	0.394821	2.33409	11.984	0.000536585	0.0309169
Rgs11	0.392161	3.16244	18.1712	2.01913e-05	0.00293615
Tnfrsf12a	0.386427	6.90066	68.6014	1.20521e-16	7.36084e-13
Id3	0.383777	3.92812	18.3867	1.80314e-05	0.00271918
Atg9b	0.369563	6.72536	25.3061	4.89162e-07	0.000150615
Emx2	0.369498	2.62115	10.9111	0.000955874	0.0457882
Col5a2	0.363813	5.12923	25.8675	3.65675e-07	0.000131374
Spaca6	0.361816	4.03415	25.0563	5.56792e-07	0.000165883
Tmem150a	0.355436	2.41084	12.9184	0.000325376	0.0218377
Serpine2	0.352127	5.30159	60.9187	5.94799e-15	1.81637e-11
Ms4a10	0.349107	4.84193	22.2124	2.44086e-06	0.000576752
Gsdmc2	0.345394	3.32922	11.4258	0.0007243	0.0378538
Slc4a3	0.345386	4.0282	18.6249	1.59129e-05	0.002492
Slc25a27	0.342091	3.00076	19.07	1.26013e-05	0.00210856
Cplx2	0.335623	2.26414	11.7782	0.000599288	0.0326799
Peg3	0.334637	3.91888	19.5831	9.63189e-06	0.00170512
Tbx1	0.327281	2.67822	11.7811	0.000598362	0.0326799
Csta1	0.321596	4.27434	12.3888	0.000431915	0.0263792
Gpc2	0.317797	3.51025	12.8659	0.00033463	0.0223361
Anks1b	0.315215	2.9914	15.0229	0.000106217	0.0100576
Leng8	0.311401	6.7066	27.598	1.4933e-07	6.51453e-05
Htr1d	0.31104	4.2954	11.2317	0.000804102	0.0406471
Usp2	0.302303	3.41339	13.4587	0.000243878	0.0183078
Ints6l	0.30169	3.91012	17.4001	3.02802e-05	0.00387266
Dync2h1	0.285368	3.26444	11.8294	0.000583035	0.0323533
2700081O15Rik	0.285187	3.5719	18.663	1.5598e-05	0.0024744
Lrrk2	0.283184	3.47253	16.0735	6.09307e-05	0.00664525
Slc18b1	0.279297	3.26473	15.7236	7.33057e-05	0.00778634
Ogdhl	0.276746	3.69058	13.3534	0.000257952	0.0188676
Ces2f	0.276473	7.30965	30.0434	4.2248e-08	2.34572e-05
Mgmt	0.275594	4.45593	25.699	3.99024e-07	0.000139259
Trim7	0.263224	6.15412	33.8794	5.86361e-09	4.21318e-06
9930104L06Rik	0.262427	3.3885	10.8722	0.000976203	0.0462082
Adm	0.260336	4.75625	18.3354	1.8523e-05	0.00272601
Ror2	0.260285	3.74239	12.4607	0.000415608	0.0259013
Atat1	0.260274	3.46789	12.5103	0.000404706	0.0255255
Nrbp2	0.255615	6.64936	34.0031	5.50229e-09	4.20066e-06
Rrnad1	0.253501	3.34552	12.1725	0.000484986	0.0291313
Cish	0.25287	3.94225	12.4174	0.000425342	0.0262401
Chst15	0.252708	4.96494	26.4188	2.74856e-07	0.000108302
Serpinb6c	0.252377	4.50616	11.4236	0.000725156	0.0378538

## Sheet: DEGs_miR149EKOvsWT_KCs_73down
Genes	LogFC	logCPM	LR	PValue	FDR
Slc6a9	-0.256359	5.71523	12.1266	0.000497083	0.0294751
Snrpn	-0.260097	3.04611	12.1667	0.000486515	0.0291313
Snurf	-0.265405	2.98684	11.6551	0.000640276	0.034606
Igfbp7	-0.27623	7.14197	11.1874	0.000823532	0.040892
Fyn	-0.276365	4.11233	15.123	0.000100728	0.00976504
Scin	-0.282509	3.57547	16.9911	3.75546e-05	0.0045873
Hs6st1	-0.286971	6.52749	14.3616	0.000150849	0.0131615
Rrad	-0.287796	4.33634	16.4773	4.92371e-05	0.00551772
Cgnl1	-0.287823	3.43899	13.0524	0.000302891	0.0209029
Fam129a	-0.291059	6.88879	19.9147	8.09759e-06	0.00149867
Ly75	-0.292574	3.03285	11.2549	0.000794127	0.0405869
Klk8	-0.293676	3.11024	14.0221	0.000180676	0.0150133
Fabp5	-0.295132	9.19961	28.9508	7.42403e-08	3.9428e-05
D17H6S56E-5	-0.2966	9.69217	13.0285	0.000306783	0.020935
Lyn	-0.300618	2.47598	11.1521	0.000839344	0.041175
Ctsc	-0.300851	5.74818	19.9354	8.01016e-06	0.00149867
Clu	-0.301486	5.99719	25.2902	4.93215e-07	0.000150615
Myorg	-0.316969	5.23725	38.6357	5.1077e-10	7.79883e-07
Dynap	-0.317775	5.67725	37.8879	7.49275e-10	1.01693e-06
Mthfd2	-0.32177	6.13437	13.9698	0.000185773	0.0151281
Arg1	-0.327442	2.92991	11.9627	0.000542765	0.0311261
Psat1	-0.32945	7.43665	21.9541	2.79254e-06	0.000631682
Mgst3	-0.332348	3.75314	17.0181	3.70261e-05	0.0045873
Psph	-0.338161	5.56668	22.1273	2.55155e-06	0.000588061
Garem1	-0.350045	3.81781	35.7765	2.21299e-09	2.07936e-06
Lgals1	-0.358917	5.0368	18.5093	1.69082e-05	0.00258167
Slc7a5	-0.359918	7.20651	14.6568	0.000128968	0.0116692
Tnnt2	-0.3817	1.94027	10.894	0.000964768	0.0460338
Acot7	-0.383409	5.28007	25.6335	4.12803e-07	0.000139758
Trib3	-0.386021	5.46659	15.1507	9.92608e-05	0.00969977
Epcam	-0.402221	6.47892	25.5849	4.23336e-07	0.000139758
Dpyd	-0.40953	1.66933	11.2268	0.000806243	0.0406471
Serpinb1a	-0.410188	4.74672	28.6602	8.62577e-08	4.39016e-05
Cdhr1	-0.410894	1.63503	11.2731	0.000786381	0.0403811
Zdhhc2	-0.411109	3.31548	24.7474	6.53558e-07	0.000185656
Npr3	-0.41475	5.12791	35.6054	2.41615e-09	2.10809e-06
Slc25a29	-0.414993	2.01067	11.2721	0.000786795	0.0403811
Slc7a3	-0.417813	3.67306	16.7726	4.21364e-05	0.004949
Padi3	-0.419597	3.876	23.2234	1.44232e-06	0.000367041
Steap4	-0.428264	4.77702	13.4554	0.000244303	0.0183078
Pck2	-0.430895	5.78426	20.6442	5.53052e-06	0.001145
Lrrc4	-0.449672	3.95683	20.1843	7.0326e-06	0.00138554
Mal	-0.451561	5.01075	19.144	1.21217e-05	0.00205648
Krt8	-0.456685	4.19063	28.3765	9.98688e-08	4.69191e-05
Tspan13	-0.464446	1.58639	10.9517	0.000935197	0.0449742
Adam12	-0.465639	5.19572	23.0487	1.57949e-06	0.000393745
Atp6v1c2	-0.477426	2.76416	13.55	0.000232294	0.0178458
Gstp3	-0.479284	2.29443	13.9227	0.000190484	0.015409
Olfr1033	-0.49248	4.43078	20.5819	5.71345e-06	0.00116316
Aldh1l2	-0.494434	5.45473	40.4423	2.02506e-10	4.94723e-07
Inpp4b	-0.497811	2.75309	13.8541	0.000197564	0.0158766
Bcl2l15	-0.504933	4.53763	15.8981	6.6845e-05	0.00722577
Tspan12	-0.518979	1.72093	16.3862	5.16612e-05	0.00573674
Dnase1l3	-0.520737	3.20151	32.8247	1.00857e-08	6.84426e-06
Pla2g7	-0.521116	2.14721	17.7663	2.49763e-05	0.00346688
Cadm4	-0.52518	4.0775	34.7011	3.8442e-09	3.13046e-06
Krt18	-0.529156	1.82353	18.3485	1.83961e-05	0.00272601
Krt42	-0.538288	6.21282	22.6088	1.98578e-06	0.000485126
Rnf125	-0.555097	1.11355	10.9938	0.000914186	0.0443126
Fut1	-0.581865	1.69236	12.4004	0.000429232	0.0263471
Aldh3a1	-0.601196	2.94711	31.08	2.47611e-08	1.44027e-05
Aldh1a3	-0.621566	4.34998	28.5727	9.02469e-08	4.40947e-05
Oasl2	-0.622562	1.4254	13.6146	0.000224431	0.0173508
Gm13212	-0.631266	1.48989	18.5887	1.6218e-05	0.00250763
Khdrbs3	-0.641116	1.91712	23.8868	1.02172e-06	0.000283643
Hoxa11	-0.660571	0.702708	13.9761	0.000185145	0.0151281
2610528A11Rik	-0.733178	1.05327	17.0236	3.69183e-05	0.0045873
Slc39a4	-0.747085	0.96286	19.5244	9.93253e-06	0.00173323
Mmp9	-0.796948	4.50027	23.6079	1.18104e-06	0.000313617
Chd5	-0.85023	0.156625	14.5312	0.000137854	0.0122912
Bcat1	-0.963502	1.03011	14.1584	0.000168046	0.0143544
Gm2007	-1.10096	0.63497	15.0914	0.000102429	0.00977481
Cxcl5	-1.45012	0.353225	14.0426	0.000178713	0.0149519
