# Supplementary material for: Loss of epidermal microRNA-149 sensitizes to skin inflammation
Source: Research Square preprint supplement (doi:10.21203/rs.3.rs-6047392/v1), 2025-07-29
Supplement: Supplementary file 7 [file acc51ceb634d9342f110737d.xlsx]

## Sheet: DEGs_Epidermis (filtered)_3591
Genes	logFC	logCPM	LR	PValue	FDR	gene_name
ENSG00000171711.2	13.4058	4.37943	189.378	4.34654e-43	2.39457e-40	DEFB4A
ENSG00000184330.11	11.9339	9.89971	346.154	2.91519e-77	1.87369e-73	S100A7A
ENSG00000244094.1	11.2333	4.58575	151.9	6.66334e-35	1.7737e-32	SPRR2F
ENSG00000134827.7	11.1514	6.87122	276.905	3.54792e-62	6.21918e-59	TCN1
ENSG00000163221.8	10.9777	1.9713	141.098	1.53137e-32	3.2246e-30	S100A12
ENSG00000124102.4	10.5955	9.35011	158.458	2.4585e-36	7.52456e-34	PI3
ENSG00000206073.10	10.5852	9.82353	204.418	2.26838e-46	1.61996e-43	SERPINB4
ENSG00000229035.2	10.363	1.36874	77.2834	1.48108e-18	5.33796e-17	SPRR2C
ENSG00000241794.1	10.3219	7.8792	165.633	6.65337e-38	2.33255e-35	SPRR2A
ENSG00000145113.21	10.239	4.53229	65.8062	4.9751e-16	1.2394e-14	MUC4
ENSG00000154198.14	9.99236	3.60536	115.754	5.38144e-27	6.5261e-25	CYP4Z2P
ENSG00000050730.15	9.77384	3.7778	178.376	1.09671e-40	5.03494e-38	TNIP3
ENSG00000163220.10	9.47016	11.7347	265.741	9.61832e-60	1.42662e-56	S100A9
ENSG00000153292.15	9.40313	2.43703	248.684	5.02768e-56	6.05899e-53	ADGRF1
ENSG00000143546.9	9.02952	11.1983	192.329	9.86248e-44	5.59319e-41	S100A8
ENSG00000143556.8	8.56419	10.5655	195.495	2.00888e-44	1.1738e-41	S100A7
ENSG00000140519.12	8.41742	6.51084	205.091	1.61821e-46	1.20009e-43	RHCG
ENSG00000170465.9	8.27996	9.33667	114.303	1.11822e-26	1.29889e-24	KRT6C
ENSG00000093134.13	8.24379	2.26914	154.527	1.77613e-35	5.35115e-33	VNN3
ENSG00000187510.7	8.22078	2.0773	141.786	1.08302e-32	2.3203e-30	PLEKHG7
ENSG00000196805.7	8.15889	3.79038	81.8457	1.47136e-19	6.18099e-18	SPRR2B
ENSG00000065675.14	7.79454	2.72638	341.031	3.80486e-76	1.4673e-72	PRKCQ
ENSG00000012223.12	7.28247	7.79074	33.7561	6.24738e-09	4.88888e-08	LTF
ENSG00000153802.11	7.22083	4.76311	124.112	7.96137e-29	1.17184e-26	TMPRSS11D
ENSG00000115919.14	7.20351	5.68088	564.585	8.45705e-125	1.63069e-120	KYNU
ENSG00000214215.3	7.16255	1.00703	92.9707	5.30737e-22	3.2385e-20	C12orf74
ENSG00000181333.11	7.16207	5.73577	175.198	5.42012e-40	2.22363e-37	HEPHL1
ENSG00000137757.10	7.0788	0.443636	68.5606	1.2304e-16	3.42345e-15	CASP5
ENSG00000198074.9	7.01113	6.77627	341.393	3.17375e-76	1.4673e-72	AKR1B10
ENSG00000271856.1	6.86544	1.25763	142.518	7.49195e-33	1.67976e-30	LINC01215
ENSG00000057149.14	6.85844	9.37716	110.826	6.46115e-26	6.52272e-24	SERPINB3
ENSG00000279496.1	6.54375	3.37061	278.978	1.25394e-62	2.41785e-59	CTC-251I16.1
ENSG00000111335.12	6.51402	5.7577	175.211	5.38539e-40	2.22363e-37	OAS2
ENSG00000113749.6	6.40277	4.21752	303.096	6.97053e-68	1.92008e-64	HRH2
ENSG00000159167.11	6.28856	2.56692	67.2446	2.39827e-16	6.35211e-15	STC1
ENSG00000189420.8	6.20379	2.74037	125.216	4.56549e-29	7.05236e-27	ZFP92
ENSG00000186832.8	6.1707	10.7604	135.866	2.13466e-31	3.99617e-29	KRT16
ENSG00000224689.7	6.14187	0.251581	100.949	9.43936e-24	7.49011e-22	ZNF812
ENSG00000070526.14	6.08492	2.07041	114.101	1.23838e-26	1.3964e-24	ST6GALNAC1
ENSG00000163216.6	6.05606	6.3098	101.852	5.98273e-24	4.90889e-22	SPRR2D
ENSG00000165949.12	5.97648	7.05141	94.6939	2.22224e-22	1.4379e-20	IFI27
ENSG00000100342.20	5.89216	4.61419	136.103	1.8942e-31	3.58078e-29	APOL1
ENSG00000188293.5	5.88828	3.3729	80.9732	2.28794e-19	9.28761e-18	IGFL1
ENSG00000121966.6	5.75252	3.56386	106.987	4.48036e-25	4.07502e-23	CXCR4
ENSG00000162891.10	5.73698	1.74274	38.3038	6.05441e-10	5.71931e-09	IL20
ENSG00000115009.11	5.70786	2.52538	48.3528	3.5604e-12	4.96397e-11	CCL20
ENSG00000237943.6	5.70376	1.09394	133.497	7.04015e-31	1.22296e-28	PRKCQ-AS1
ENSG00000120217.13	5.68039	3.57076	166.225	4.93936e-38	1.76372e-35	CD274
ENSG00000163739.4	5.61249	2.44116	32.3685	1.27537e-08	9.40049e-08	CXCL1
ENSG00000119125.16	5.54958	4.11763	96.7436	7.89117e-23	5.45368e-21	GDA
ENSG00000136688.10	5.53631	5.99561	179.32	6.82339e-41	3.20899e-38	IL36G
ENSG00000169429.10	5.49761	3.28672	31.5757	1.91813e-08	1.36176e-07	CXCL8
ENSG00000134321.11	5.48907	2.68647	73.2544	1.13972e-17	3.67493e-16	RSAD2
ENSG00000205420.10	5.45467	12.351	115.568	5.90921e-27	7.03342e-25	KRT6A
ENSG00000227471.8	5.43873	2.18359	90.7364	1.64146e-21	9.33645e-20	AKR1B15
ENSG00000188373.4	5.42094	5.94039	201.464	1.00092e-45	6.89277e-43	C10orf99
ENSG00000004468.12	5.37154	1.16679	152.396	5.19211e-35	1.4259e-32	CD38
ENSG00000007171.16	5.36635	2.49977	66.9525	2.78126e-16	7.24707e-15	NOS2
ENSG00000126709.14	5.33092	6.42135	70.9034	3.75148e-17	1.14095e-15	IFI6
ENSG00000135114.12	5.29897	1.98887	82.7721	9.20822e-20	3.99894e-18	OASL
ENSG00000204610.12	5.29241	0.673222	77.2627	1.49663e-18	5.38396e-17	TRIM15
ENSG00000255267.3	5.1923	0.327359	80.1489	3.47239e-19	1.36364e-17	RP11-430H10.2
ENSG00000165474.5	5.03893	10.013	161.896	4.35972e-37	1.42482e-34	GJB2
ENSG00000273132.1	5.03437	0.425587	48.7167	2.95733e-12	4.18981e-11	RP11-350J20.12
ENSG00000132688.10	5.02454	5.72933	123.127	1.30828e-28	1.89671e-26	NES
ENSG00000148346.11	4.9855	5.34167	48.6118	3.11979e-12	4.39414e-11	LCN2
ENSG00000104368.17	4.96675	6.56115	176.661	2.5974e-40	1.11296e-37	PLAT
ENSG00000134326.11	4.92482	2.48469	85.5285	2.28389e-20	1.10095e-18	CMPK2
ENSG00000079385.21	4.9017	2.14372	46.7089	8.23543e-12	1.07731e-10	CEACAM1
ENSG00000182585.9	4.89154	2.77418	57.8193	2.87342e-14	5.6536e-13	EPGN
ENSG00000281194.1	4.82581	0.695416	45.7692	1.33038e-11	1.68988e-10	AC055736.3
ENSG00000178233.17	4.80488	1.23934	45.9785	1.19558e-11	1.53061e-10	TMEM151B
ENSG00000204613.10	4.79626	1.35158	67.8308	1.78147e-16	4.84489e-15	TRIM10
ENSG00000025708.12	4.76973	7.40781	248.793	4.75907e-56	6.05899e-53	TYMP
ENSG00000184254.16	4.75306	3.96858	88.6749	4.65321e-21	2.49925e-19	ALDH1A3
ENSG00000198682.12	4.7527	3.7761	147.69	5.54433e-34	1.35324e-31	PAPSS2
ENSG00000106302.9	4.71938	1.80464	58.6881	1.84759e-14	3.77385e-13	HYAL4
ENSG00000172243.17	4.63748	4.67097	134.356	4.56584e-31	8.30551e-29	CLEC7A
ENSG00000133216.16	4.57469	5.26719	196.89	9.96507e-45	6.19827e-42	EPHB2
ENSG00000137965.10	4.56796	5.04447	63.7443	1.41666e-15	3.33938e-14	IFI44
ENSG00000137959.15	4.53481	5.16609	38.3715	5.8479e-10	5.53828e-09	IFI44L
ENSG00000175471.19	4.53107	2.83118	49.3302	2.16307e-12	3.12314e-11	MCTP1
ENSG00000113083.12	4.50815	2.99382	181.122	2.75697e-41	1.36307e-38	LOX
ENSG00000272666.1	4.50305	1.34549	98.1715	3.83665e-23	2.81286e-21	CTA-384D8.35
ENSG00000157601.13	4.46082	6.82081	101.259	8.07171e-24	6.53944e-22	MX1
ENSG00000119121.21	4.45395	2.82917	72.245	1.90072e-17	6.00814e-16	TRPM6
ENSG00000157111.12	4.45143	2.32903	142.253	8.56077e-33	1.89734e-30	TMEM171
ENSG00000203785.8	4.44588	6.95589	85.2382	2.64499e-20	1.26553e-18	SPRR2E
ENSG00000069011.15	4.36316	3.7037	174.698	6.96963e-40	2.79976e-37	PITX1
ENSG00000062096.14	4.30866	4.43644	87.4559	8.61822e-21	4.41959e-19	ARSF
ENSG00000175592.8	4.29681	4.21762	64.0381	1.22035e-15	2.90504e-14	FOSL1
ENSG00000112299.7	4.27897	2.46995	105.056	1.18728e-24	1.03122e-22	VNN1
ENSG00000132357.13	4.26911	4.14559	110.924	6.14833e-26	6.23959e-24	CARD6
ENSG00000128340.14	4.25629	2.81823	121.988	2.32201e-28	3.24441e-26	RAC2
ENSG00000119714.10	4.23085	4.33929	236.408	2.38737e-53	2.30167e-50	GPR68
ENSG00000231971.5	4.21693	1.70807	85.0674	2.8836e-20	1.3695e-18	RP11-557H15.3
ENSG00000164687.10	4.21594	8.32211	250.852	1.69348e-56	2.3324e-53	FABP5
ENSG00000158859.9	4.11014	2.97262	60.2981	8.15264e-15	1.73509e-13	ADAMTS4
ENSG00000002587.9	4.07515	1.52859	44.6918	2.30621e-11	2.82698e-10	HS3ST1
ENSG00000234964.4	4.04614	2.92869	122.272	2.01231e-28	2.83221e-26	FABP5P7
ENSG00000169469.8	4.0238	8.45759	101.11	8.70151e-24	6.99094e-22	SPRR1B
ENSG00000248485.1	4.01646	4.58793	121.286	3.30749e-28	4.4912e-26	PCP4L1
ENSG00000253417.5	3.96148	1.50452	99.6865	1.78538e-23	1.3607e-21	RP11-109J4.1
ENSG00000103044.10	3.95449	6.73059	93.3193	4.45037e-22	2.77709e-20	HAS3
ENSG00000241735.1	3.94419	1.45311	73.5849	9.63998e-18	3.15583e-16	FABP5P3
ENSG00000231678.2	3.93817	0.574475	50.2543	1.35057e-12	2.01249e-11	RP11-339N8.1
ENSG00000131126.18	3.91669	0.067003	48.3297	3.60254e-12	5.01547e-11	TEX101
ENSG00000178919.8	3.90974	4.56163	140.746	1.82884e-32	3.71196e-30	FOXE1
ENSG00000183908.5	3.90352	2.5835	70.9366	3.68893e-17	1.1237e-15	LRRC55
ENSG00000188095.4	3.87772	0.324993	67.5961	2.00664e-16	5.40022e-15	MESP2
ENSG00000185745.9	3.87744	4.11701	67.8446	1.76901e-16	4.82461e-15	IFIT1
ENSG00000148680.15	3.87481	1.32437	60.4079	7.71012e-15	1.65002e-13	HTR7
ENSG00000064886.13	3.86999	5.01242	54.2525	1.7631e-13	3.09619e-12	CHI3L2
ENSG00000130487.5	3.83595	0.655314	51.9485	5.69746e-13	9.10177e-12	KLHDC7B
ENSG00000133106.14	3.82761	2.89648	64.319	1.05822e-15	2.54739e-14	EPSTI1
ENSG00000090376.8	3.80684	4.68572	133.711	6.31868e-31	1.10761e-28	IRAK3
ENSG00000143320.8	3.79071	8.84806	214.467	1.45689e-48	1.22138e-45	CRABP2
ENSG00000138642.14	3.78519	5.79531	77.2571	1.5009e-18	5.38927e-17	HERC6
ENSG00000089127.12	3.78232	5.11444	184.168	5.96254e-42	3.02552e-39	OAS1
ENSG00000132530.16	3.76724	5.09978	79.3354	5.24133e-19	2.00921e-17	XAF1
ENSG00000227300.12	3.75728	0.445631	45.1359	1.83822e-11	2.28822e-10	KRT16P2
ENSG00000165449.11	3.7431	2.10988	48.5639	3.19695e-12	4.49567e-11	SLC16A9
ENSG00000133101.9	3.72857	0.00770174	73.7586	8.82799e-18	2.91475e-16	CCNA1
ENSG00000170298.15	3.7284	0.328875	81.1976	2.04238e-19	8.34346e-18	LGALS9B
ENSG00000163874.8	3.71863	8.01537	290.522	3.82669e-65	8.19848e-62	ZC3H12A
ENSG00000173432.10	3.7104	1.47722	28.0976	1.15347e-07	7.13316e-07	SAA1
ENSG00000005001.9	3.70176	4.30652	86.3345	1.51933e-20	7.52234e-19	PRSS22
ENSG00000159516.8	3.69136	4.32776	43.5303	4.17456e-11	4.90218e-10	SPRR2G
ENSG00000280032.1	3.68908	1.90994	122.765	1.57007e-28	2.25926e-26	RP11-832A4.7
ENSG00000269981.1	3.67959	0.0770286	38.19	6.41805e-10	6.03084e-09	RP11-34P13.16
ENSG00000138829.10	3.66841	2.82023	67.1178	2.55757e-16	6.69132e-15	FBN2
ENSG00000159337.6	3.63456	6.90562	65.062	7.25769e-16	1.77818e-14	PLA2G4D
ENSG00000128965.11	3.62415	0.547579	69.1783	8.99529e-17	2.57722e-15	CHAC1
ENSG00000105928.13	3.62244	2.15457	82.4897	1.06224e-19	4.58215e-18	DFNA5
ENSG00000166450.12	3.61916	0.62744	13.6638	0.000218632	0.00069348	PRTG
ENSG00000135218.17	3.61644	6.33677	67.5422	2.06229e-16	5.5306e-15	CD36
ENSG00000100433.15	3.61295	1.66394	136.566	1.50051e-31	2.89328e-29	KCNK10
ENSG00000184979.9	3.6083	1.64163	74.9673	4.78582e-18	1.62179e-16	USP18
ENSG00000177614.9	3.59051	3.94737	114.707	9.12254e-27	1.07257e-24	PGBD5
ENSG00000139329.4	3.58321	1.20444	34.651	3.94426e-09	3.20494e-08	LUM
ENSG00000131015.4	3.56692	0.330959	82.9164	8.55993e-20	3.75974e-18	ULBP2
ENSG00000185479.5	3.56578	9.8623	38.5907	5.22675e-10	5.01403e-09	KRT6B
ENSG00000211445.11	3.55121	5.10098	77.701	1.19879e-18	4.36956e-17	GPX3
ENSG00000137648.16	3.54038	5.24637	55.6613	8.6098e-14	1.59017e-12	TMPRSS4
ENSG00000272398.5	3.53288	7.9265	98.151	3.87663e-23	2.83141e-21	CD24
ENSG00000254087.7	3.50941	4.48766	137.886	7.71917e-32	1.51879e-29	LYN
ENSG00000187608.8	3.50591	1.80201	47.1981	6.41616e-12	8.5795e-11	ISG15
ENSG00000244122.2	3.49869	3.65514	62.2912	2.96249e-15	6.72824e-14	UGT1A7
ENSG00000185885.15	3.48323	3.97649	62.0003	3.43407e-15	7.70847e-14	IFITM1
ENSG00000145703.15	3.48022	3.04721	47.0342	6.97592e-12	9.26375e-11	IQGAP2
ENSG00000148798.9	3.46916	3.23025	54.7166	1.39228e-13	2.49962e-12	INA
ENSG00000169474.4	3.4474	5.56972	71.6832	2.52673e-17	7.87083e-16	SPRR1A
ENSG00000167617.2	3.44082	3.12117	95.4954	1.48232e-22	9.8559e-21	CDC42EP5
ENSG00000168461.12	3.43306	4.89627	166.634	4.02223e-38	1.46333e-35	RAB31
ENSG00000172350.9	3.42953	1.00426	28.4695	9.51879e-08	5.9883e-07	ABCG4
ENSG00000167772.11	3.42769	5.22128	99.5477	1.91492e-23	1.44232e-21	ANGPTL4
ENSG00000113070.7	3.4206	5.57599	35.5733	2.45637e-09	2.08835e-08	HBEGF
ENSG00000135047.14	3.41793	4.88506	138.658	5.23223e-32	1.04008e-29	CTSL
ENSG00000174469.17	3.39626	1.24742	126.732	2.12665e-29	3.38892e-27	CNTNAP2
ENSG00000167759.12	3.39397	6.03847	71.9276	2.23238e-17	6.99307e-16	KLK13
ENSG00000245648.1	3.35512	2.42686	146.308	1.11167e-33	2.61406e-31	RP11-277P12.20
ENSG00000119917.13	3.34405	4.36272	62.0555	3.33911e-15	7.50404e-14	IFIT3
ENSG00000132274.15	3.34182	5.59161	81.5716	1.69023e-19	7.0088e-18	TRIM22
ENSG00000153976.2	3.34044	1.89999	55.6673	8.58348e-14	1.58683e-12	HS3ST3A1
ENSG00000253746.1	3.3401	0.589598	68.7268	1.13092e-16	3.17415e-15	RP11-527N22.2
ENSG00000272636.3	3.32344	4.74133	74.8723	5.02165e-18	1.69575e-16	DOC2B
ENSG00000274605.1	3.31963	2.64799	113.391	1.77177e-26	1.9411e-24	RP11-12G12.7
ENSG00000170458.13	3.30766	1.82594	71.3915	2.92936e-17	9.06645e-16	CD14
ENSG00000243137.7	3.30565	0.0221137	8.40063	0.00375091	0.0088536	PSG4
ENSG00000272189.1	3.30543	0.272175	105.105	1.15805e-24	1.01038e-22	RP3-325F22.5
ENSG00000268104.2	3.29577	5.13493	21.8923	2.88394e-06	1.36261e-05	SLC6A14
ENSG00000185404.16	3.28764	2.40835	95.7147	1.3269e-22	8.97727e-21	SP140L
ENSG00000172382.9	3.28118	3.61777	84.5048	3.83292e-20	1.79384e-18	PRSS27
ENSG00000171916.16	3.2611	0.0916008	49.6815	1.80839e-12	2.63364e-11	LGALS9C
ENSG00000167755.13	3.25452	4.53643	23.6351	1.16446e-06	5.94377e-06	KLK6
ENSG00000260528.3	3.22244	0.952426	30.7095	2.99692e-08	2.06013e-07	FAM157C
ENSG00000182326.14	3.18902	4.92828	158.475	2.4374e-36	7.52456e-34	C1S
ENSG00000183347.14	3.18225	4.24504	68.8602	1.05694e-16	2.99706e-15	GBP6
ENSG00000157445.14	3.18142	2.00458	47.1681	6.51527e-12	8.69997e-11	CACNA2D3
ENSG00000229644.6	3.17675	3.3086	52.5448	4.20552e-13	6.91311e-12	NAMPTP1
ENSG00000184557.4	3.16432	5.01229	44.1848	2.9879e-11	3.59405e-10	SOCS3
ENSG00000171124.12	3.15905	2.80717	63.0113	2.05529e-15	4.75181e-14	FUT3
ENSG00000196754.10	3.15007	7.1107	111.362	4.92913e-26	5.10986e-24	S100A2
ENSG00000121742.15	3.13834	7.93433	117.631	2.0882e-27	2.63168e-25	GJB6
ENSG00000157103.10	3.13103	2.02974	23.8073	1.0648e-06	5.47215e-06	SLC6A1
ENSG00000134755.14	3.13052	9.09276	67.196	2.4581e-16	6.46638e-15	DSC2
ENSG00000111331.12	3.12853	7.10448	154.275	2.01623e-35	5.98105e-33	OAS3
ENSG00000075673.11	3.11984	4.81667	14.4352	0.000145066	0.000477942	ATP12A
ENSG00000007062.11	3.10894	1.5646	24.7873	6.40182e-07	3.44804e-06	PROM1
ENSG00000268903.1	3.09094	0.725463	24.0652	9.3127e-07	4.83618e-06	RP11-34P13.15
ENSG00000042062.11	3.07738	1.32447	45.7832	1.32092e-11	1.68008e-10	FAM65C
ENSG00000253161.5	3.05231	2.7915	93.0043	5.21798e-22	3.20424e-20	LINC01605
ENSG00000137440.4	3.04241	7.07914	152.373	5.25044e-35	1.4259e-32	FGFBP1
ENSG00000275216.1	3.03925	0.588456	31.0802	2.4758e-08	1.72465e-07	RP11-54H7.4
ENSG00000141668.9	3.03694	0.280731	12.586	0.000388647	0.00116605	CBLN2
ENSG00000109861.15	3.03073	6.85264	200.786	1.4074e-45	9.35778e-43	CTSC
ENSG00000176920.11	3.02993	4.58049	107.163	4.09974e-25	3.80054e-23	FUT2
ENSG00000197641.11	3.00952	7.20005	56.132	6.77638e-14	1.26733e-12	SERPINB13
ENSG00000171903.16	3.0004	2.07076	10.0131	0.0015543	0.00405164	CYP4F11
ENSG00000172602.9	2.99382	1.18815	42.6133	6.67037e-11	7.53475e-10	RND1
ENSG00000180871.7	2.98296	4.16035	143.335	4.96473e-33	1.13964e-30	CXCR2
ENSG00000171236.9	2.97699	4.43892	115.614	5.77533e-27	6.96e-25	LRG1
ENSG00000081041.8	2.97658	1.26093	11.3208	0.000766454	0.00214371	CXCL2
ENSG00000114948.12	2.97545	3.1672	137.661	8.64558e-32	1.68388e-29	ADAM23
ENSG00000094963.13	2.97032	2.05683	28.4603	9.56382e-08	6.01152e-07	FMO2
ENSG00000243649.8	2.95027	1.40384	62.061	3.32976e-15	7.49311e-14	CFB
ENSG00000101670.11	2.9375	5.11012	36.0413	1.93177e-09	1.66883e-08	LIPG
ENSG00000139547.7	2.92557	2.23872	81.8991	1.43215e-19	6.05585e-18	RDH16
ENSG00000166535.19	2.91089	9.33663	53.3574	2.78068e-13	4.7365e-12	A2ML1
ENSG00000108950.11	2.90385	2.51199	23.2294	1.43781e-06	7.20475e-06	FAM20A
ENSG00000280693.2	2.89964	4.54297	66.403	3.67551e-16	9.33744e-15	SH3PXD2A-AS1
ENSG00000140534.13	2.89605	4.04978	154.17	2.12588e-35	6.21079e-33	TICRR
ENSG00000269741.5	2.89186	2.67451	51.4872	7.20647e-13	1.12972e-11	KLK9
ENSG00000112559.13	2.88725	4.34024	121.926	2.39668e-28	3.32466e-26	MDFI
ENSG00000233461.5	2.88649	4.7505	98.4756	3.29061e-23	2.44036e-21	RP11-295G20.2
ENSG00000146072.6	2.87449	4.79428	85.8521	1.93911e-20	9.41811e-19	TNFRSF21
ENSG00000134242.15	2.85702	0.955443	17.1374	3.47699e-05	0.000131702	PTPN22
ENSG00000144648.14	2.85601	2.90234	23.2848	1.39699e-06	7.02024e-06	ACKR2
ENSG00000073464.11	2.84277	2.81234	66.0954	4.29626e-16	1.07784e-14	CLCN4
ENSG00000159403.15	2.84266	6.28472	207.36	5.17363e-47	3.99032e-44	C1R
ENSG00000133962.7	2.83948	1.97822	58.5881	1.94392e-14	3.95805e-13	CATSPERB
ENSG00000259230.1	2.83821	0.0950281	45.6907	1.38481e-11	1.75555e-10	CTD-2555C10.3
ENSG00000198223.14	2.83611	1.37173	27.989	1.22007e-07	7.49694e-07	CSF2RA
ENSG00000147689.16	2.83506	6.25334	98.9492	2.59061e-23	1.92865e-21	FAM83A
ENSG00000077238.13	2.83387	6.65501	150.599	1.28266e-34	3.29763e-32	IL4R
ENSG00000198624.12	2.81693	3.46245	53.3774	2.75244e-13	4.69253e-12	CCDC69
ENSG00000163202.4	2.81676	2.87628	40.2203	2.26882e-10	2.3332e-09	LCE3D
ENSG00000185215.8	2.81631	6.14636	66.7797	3.03604e-16	7.84731e-15	TNFAIP2
ENSG00000127954.12	2.80454	6.24359	45.3063	1.68507e-11	2.10847e-10	STEAP4
ENSG00000106688.11	2.80442	2.74635	52.8587	3.58424e-13	5.97849e-12	SLC1A1
ENSG00000169174.10	2.80399	4.11264	140.752	1.82268e-32	3.71196e-30	PCSK9
ENSG00000182264.8	2.78995	0.67337	42.1284	8.54709e-11	9.477e-10	IZUMO1
ENSG00000147251.15	2.78529	3.6609	68.269	1.42649e-16	3.92937e-15	DOCK11
ENSG00000175832.12	2.77962	4.12919	164.263	1.32521e-37	4.56297e-35	ETV4
ENSG00000164430.15	2.77926	2.32545	65.5144	5.76895e-16	1.42611e-14	MB21D1
ENSG00000198807.12	2.77741	0.355976	20.4379	6.15967e-06	2.72785e-05	PAX9
ENSG00000142089.15	2.77056	6.43039	93.8969	3.32396e-22	2.1014e-20	IFITM3
ENSG00000184060.10	2.75505	5.16175	72.6646	1.53666e-17	4.90562e-16	ADAP2
ENSG00000162366.7	2.75355	6.45269	122.3	1.98469e-28	2.81389e-26	PDZK1IP1
ENSG00000205413.7	2.7397	5.404	72.0998	2.04585e-17	6.45632e-16	SAMD9
ENSG00000171848.13	2.73032	5.65385	292.079	1.75196e-65	4.22267e-62	RRM2
ENSG00000187398.11	2.72857	2.14053	41.5611	1.14242e-10	1.23545e-09	LUZP2
ENSG00000146242.8	2.72214	6.31943	450.087	6.90665e-100	6.6587e-96	TPBG
ENSG00000157551.17	2.71048	4.74433	83.032	8.0734e-20	3.57044e-18	KCNJ15
ENSG00000161798.6	2.69238	0.710871	13.4635	0.000243247	0.000763641	AQP5
ENSG00000175264.7	2.68771	2.18782	28.4647	9.54215e-08	6.00103e-07	CHST1
ENSG00000135636.13	2.68055	1.49031	17.64	2.66908e-05	0.000103489	DYSF
ENSG00000134057.14	2.67684	4.99709	124.444	6.73408e-29	1.01443e-26	CCNB1
ENSG00000165181.16	2.67251	2.56434	31.622	1.87296e-08	1.33312e-07	C9orf84
ENSG00000128284.19	2.65387	2.82386	84.0745	4.76482e-20	2.1875e-18	APOL3
ENSG00000149573.8	2.6504	7.68737	218.406	2.01407e-49	1.76524e-46	MPZL2
ENSG00000254223.1	2.64764	0.330124	23.3159	1.37461e-06	6.9168e-06	RP11-419K12.1
ENSG00000163687.13	2.64728	3.24858	78.281	8.93781e-19	3.30785e-17	DNASE1L3
ENSG00000236438.6	2.64082	0.44206	32.4817	1.20319e-08	8.9093e-08	FAM157A
ENSG00000127423.10	2.63723	1.93787	92.3943	7.10189e-22	4.27933e-20	AUNIP
ENSG00000168404.12	2.63597	3.36318	125.213	4.57185e-29	7.05236e-27	MLKL
ENSG00000171208.9	2.62867	3.27032	49.069	2.47116e-12	3.54531e-11	NETO2
ENSG00000085276.17	2.62747	0.325935	39.4536	3.35949e-10	3.33734e-09	MECOM
ENSG00000128422.15	2.6273	10.3788	33.0283	9.08264e-09	6.87329e-08	KRT17
ENSG00000021355.12	2.62154	6.13763	58.4647	2.06972e-14	4.18326e-13	SERPINB1
ENSG00000019186.9	2.60934	1.21142	59.3376	1.32816e-14	2.76561e-13	CYP24A1
ENSG00000166183.15	2.60669	4.13461	56.8189	4.77863e-14	9.18659e-13	ASPG
ENSG00000154146.12	2.60424	0.0294539	88.5449	4.96935e-21	2.65426e-19	NRGN
ENSG00000140451.12	2.60295	1.82871	100.97	9.33948e-24	7.44148e-22	PIF1
ENSG00000144596.11	2.59751	3.31774	33.4677	7.24585e-09	5.58858e-08	GRIP2
ENSG00000172828.12	2.5962	2.65832	44.3025	2.81361e-11	3.40993e-10	CES3
ENSG00000221963.5	2.59491	6.32753	99.3711	2.09352e-23	1.57071e-21	APOL6
ENSG00000163251.3	2.58826	4.65915	100.387	1.25351e-23	9.66804e-22	FZD5
ENSG00000183760.10	2.58623	3.66941	34.1586	5.07979e-09	4.03745e-08	PAPL
ENSG00000148773.12	2.58445	7.25624	94.5059	2.44361e-22	1.56537e-20	MKI67
ENSG00000146094.13	2.58355	2.1505	47.0802	6.814e-12	9.07373e-11	DOK3
ENSG00000271303.1	2.57377	1.70908	68.6701	1.16392e-16	3.25256e-15	SRXN1
ENSG00000101276.14	2.5676	1.9072	71.1604	3.29339e-17	1.01281e-15	SLC52A3
ENSG00000173727.11	2.5618	0.300309	19.4573	1.02876e-05	4.34526e-05	CMB9-22P13.1
ENSG00000203722.7	2.55329	2.39444	54.4147	1.62341e-13	2.87444e-12	RAET1G
ENSG00000163993.6	2.55068	0.380135	15.6427	7.65082e-05	0.00026764	S100P
ENSG00000185736.15	2.54318	0.00243986	30.6129	3.14993e-08	2.15685e-07	ADARB2
ENSG00000135373.12	2.54274	8.65708	242.91	9.12413e-55	1.03489e-51	EHF
ENSG00000228672.3	2.54025	2.40063	112.734	2.46813e-26	2.68873e-24	PROB1
ENSG00000177989.13	2.53777	4.67795	84.3295	4.18827e-20	1.93202e-18	ODF3B
ENSG00000126787.12	2.52559	4.13955	82.8755	8.73867e-20	3.82593e-18	DLGAP5
ENSG00000008311.14	2.51887	5.76444	240.39	3.23304e-54	3.46331e-51	AASS
ENSG00000050438.16	2.51801	0.734727	29.0656	6.99682e-08	4.51969e-07	SLC4A8
ENSG00000184232.8	2.51768	3.01021	87.1272	1.01761e-20	5.15e-19	OAF
ENSG00000272568.5	2.51763	0.476239	18.4925	1.70573e-05	6.87928e-05	CTB-113D17.1
ENSG00000026751.16	2.51703	2.48828	57.3792	3.59384e-14	6.99257e-13	SLAMF7
ENSG00000233517.1	2.51643	0.00570885	31.7584	1.74595e-08	1.24963e-07	AC005162.5
ENSG00000181649.5	2.51413	4.34422	51.6461	6.64614e-13	1.04956e-11	PHLDA2
ENSG00000168502.17	2.50114	4.97389	72.6507	1.54754e-17	4.93219e-16	MTCL1
ENSG00000224566.2	2.49561	0.414578	83.6018	6.05191e-20	2.72011e-18	FAM96AP2
ENSG00000043355.10	2.49433	0.506542	30.5724	3.21636e-08	2.19843e-07	ZIC2
ENSG00000108786.10	2.48728	3.85169	120.908	4.00312e-28	5.39777e-26	HSD17B1
ENSG00000099194.5	2.48576	8.45468	42.8023	6.05604e-11	6.88923e-10	SCD
ENSG00000255221.2	2.48331	1.7207	44.6592	2.34493e-11	2.87261e-10	CARD17
ENSG00000186871.6	2.4814	2.75259	106.774	4.98947e-25	4.51676e-23	ERCC6L
ENSG00000213197.3	2.48051	0.219643	27.6218	1.4751e-07	8.94428e-07	AC012066.1
ENSG00000089057.14	2.47821	7.73448	106.529	5.64696e-25	5.08807e-23	SLC23A2
ENSG00000092295.11	2.47278	6.96863	34.334	4.64204e-09	3.71864e-08	TGM1
ENSG00000185507.19	2.47123	4.68097	88.1839	5.96443e-21	3.15085e-19	IRF7
ENSG00000143942.4	2.47086	1.31189	63.6721	1.46948e-15	3.45122e-14	CHAC2
ENSG00000179477.9	2.4708	7.24196	32.7231	1.06268e-08	7.9513e-08	ALOX12B
ENSG00000249859.7	2.46852	2.74537	49.5368	1.94685e-12	2.82674e-11	PVT1
ENSG00000224940.8	2.46465	1.3598	39.7292	2.91725e-10	2.92666e-09	PRRT4
ENSG00000134070.4	2.46338	3.33576	76.7727	1.91813e-18	6.7863e-17	IRAK2
ENSG00000178773.14	2.45617	1.95954	37.1214	1.11e-09	1.00248e-08	CPNE7
ENSG00000154065.16	2.45605	2.49679	85.7489	2.04295e-20	9.89751e-19	ANKRD29
ENSG00000151715.7	2.45447	5.72991	98.1114	3.95489e-23	2.86685e-21	TMEM45B
ENSG00000182481.8	2.45107	6.17201	272.1	3.95497e-61	6.35498e-58	KPNA2
ENSG00000114251.13	2.45027	5.6753	139.433	3.54132e-32	7.11289e-30	WNT5A
ENSG00000163435.15	2.44197	3.90051	30.9176	2.69218e-08	1.86327e-07	ELF3
ENSG00000231870.4	2.43596	1.57674	15.0038	0.000107293	0.000363675	KRT17P3
ENSG00000233930.3	2.42669	0.0505423	13.5005	0.000238503	0.000750092	KRTAP5-AS1
ENSG00000151012.13	2.42013	4.4537	39.1858	3.85323e-10	3.77723e-09	SLC7A11
ENSG00000138496.16	2.41668	6.34546	125.433	4.09235e-29	6.41534e-27	PARP9
ENSG00000128335.13	2.41323	4.61015	94.3518	2.64142e-22	1.68648e-20	APOL2
ENSG00000174502.18	2.41247	3.9661	20.2068	6.95056e-06	3.03695e-05	SLC26A9
ENSG00000130489.12	2.41178	4.23991	107.088	4.25749e-25	3.92789e-23	SCO2
ENSG00000180347.13	2.41011	2.22445	12.943	0.000321117	0.0009822	CCDC129
ENSG00000105755.7	2.40381	3.83881	69.3361	8.30365e-17	2.39329e-15	ETHE1
ENSG00000088836.12	2.40136	3.83533	95.7023	1.33528e-22	9.00237e-21	SLC4A11
ENSG00000214456.8	2.39813	2.25635	17.7959	2.45907e-05	9.60028e-05	PLIN5
ENSG00000087586.17	2.39605	3.52858	79.6125	4.55527e-19	1.7673e-17	AURKA
ENSG00000267139.1	2.38356	1.79882	53.0237	3.29542e-13	5.51582e-12	AC005262.3
ENSG00000226887.7	2.37745	1.53756	62.5964	2.53715e-15	5.79637e-14	ERVMER34-1
ENSG00000105427.9	2.37427	6.59393	27.9985	1.21411e-07	7.46526e-07	CNFN
ENSG00000196344.11	2.36329	1.48677	26.8208	2.23226e-07	1.31468e-06	ADH7
ENSG00000178363.4	2.36186	9.5785	69.5783	7.34418e-17	2.14887e-15	CALML3
ENSG00000239264.8	2.36171	4.10201	180.104	4.60003e-41	2.21744e-38	TXNDC5
ENSG00000183914.14	2.35931	1.11542	18.8858	1.3878e-05	5.70566e-05	DNAH2
ENSG00000256940.1	2.3572	2.01854	97.3947	5.67965e-23	3.9969e-21	RP11-783K16.5
ENSG00000267688.1	2.35499	1.51066	37.6575	8.43225e-10	7.77573e-09	AC005262.2
ENSG00000158125.9	2.35483	3.99517	28.3046	1.03651e-07	6.47424e-07	XDH
ENSG00000167080.8	2.35181	3.14661	23.4507	1.28158e-06	6.48766e-06	B4GALNT2
ENSG00000225492.6	2.35127	0.356156	17.8206	2.42743e-05	9.47867e-05	GBP1P1
ENSG00000121316.10	2.34883	6.35298	86.1591	1.66028e-20	8.14595e-19	PLBD1
ENSG00000182389.18	2.34864	5.3282	40.5088	1.95732e-10	2.03456e-09	CACNB4
ENSG00000185966.3	2.34281	1.3069	28.0419	1.18717e-07	7.31577e-07	LCE3E
ENSG00000120053.10	2.34055	5.0921	303.837	4.80709e-68	1.54484e-64	GOT1
ENSG00000085831.15	2.33343	5.5504	134.104	5.18467e-31	9.17163e-29	TTC39A
ENSG00000188089.13	2.33042	8.28052	70.281	5.143e-17	1.54226e-15	PLA2G4E
ENSG00000272711.1	2.3295	0.466881	69.3961	8.05484e-17	2.33554e-15	RP11-259N19.1
ENSG00000113356.10	2.32884	3.82415	143.06	5.70425e-33	1.29399e-30	POLR3G
ENSG00000183696.13	2.32811	3.51832	36.2515	1.73425e-09	1.5097e-08	UPP1
ENSG00000174007.7	2.32511	1.16156	34.2693	4.79894e-09	3.82527e-08	CEP19
ENSG00000136542.8	2.32447	1.57047	31.6092	1.88539e-08	1.34049e-07	GALNT5
ENSG00000112984.11	2.32225	4.43166	122.341	1.94361e-28	2.77606e-26	KIF20A
ENSG00000169129.14	2.31478	6.28427	187.931	8.99515e-43	4.8179e-40	AFAP1L2
ENSG00000105173.13	2.3134	2.59645	47.8834	4.52332e-12	6.19011e-11	CCNE1
ENSG00000068615.16	2.31288	2.48415	22.1645	2.50253e-06	1.19885e-05	REEP1
ENSG00000129451.11	2.3119	6.95129	52.5628	4.16719e-13	6.86539e-12	KLK10
ENSG00000266274.2	2.31115	0.61912	40.3996	2.06981e-10	2.1434e-09	RN7SL138P
ENSG00000111012.9	2.30062	1.73687	48.7354	2.92936e-12	4.15323e-11	CYP27B1
ENSG00000125968.8	2.29099	6.62048	80.8414	2.44579e-19	9.88672e-18	ID1
ENSG00000275880.1	2.28983	2.64842	85.1309	2.79252e-20	1.32952e-18	RP11-90L1.8
ENSG00000108679.12	2.2844	6.89579	60.3005	8.14249e-15	1.73485e-13	LGALS3BP
ENSG00000049768.14	2.2794	0.918784	58.9749	1.59697e-14	3.28983e-13	FOXP3
ENSG00000168071.21	2.27553	1.79049	32.719	1.06493e-08	7.96505e-08	CCDC88B
ENSG00000117399.13	2.26841	4.7179	127.771	1.2596e-29	2.04098e-27	CDC20
ENSG00000273604.1	2.26287	3.59255	114.203	1.17636e-26	1.35492e-24	C17orf96
ENSG00000154217.14	2.25623	2.21833	50.7895	1.02825e-12	1.57354e-11	PITPNC1
ENSG00000262714.1	2.25405	0.266157	32.3348	1.29766e-08	9.53924e-08	RP11-44F14.8
ENSG00000007038.10	2.25292	0.458483	19.3832	1.06941e-05	4.49639e-05	PRSS21
ENSG00000163207.6	2.25114	6.35195	39.8931	2.6825e-10	2.71517e-09	IVL
ENSG00000167779.7	2.24947	0.181001	18.3257	1.86175e-05	7.45706e-05	IGFBP6
ENSG00000182938.4	2.24822	1.59567	23.9657	9.80671e-07	5.07224e-06	OTOP3
ENSG00000170542.5	2.24814	1.7265	12.8546	0.000336651	0.00102581	SERPINB9
ENSG00000157193.14	2.24129	4.8825	83.7356	5.65578e-20	2.55997e-18	LRP8
ENSG00000198643.6	2.24023	1.18184	15.0374	0.0001054	0.000357991	FAM3D
ENSG00000169403.11	2.23775	4.70032	89.7866	2.6529e-21	1.47416e-19	PTAFR
ENSG00000131885.16	2.23414	0.695382	19.4494	1.03302e-05	4.35764e-05	KRT17P1
ENSG00000178146.9	2.23394	0.469502	45.2921	1.69734e-11	2.12107e-10	RP1-232L22__B.1
ENSG00000166851.14	2.2245	4.55252	112.044	3.49438e-26	3.68189e-24	PLK1
ENSG00000167874.6	2.22242	0.266824	36.6216	1.43436e-09	1.27277e-08	TMEM88
ENSG00000138180.15	2.21992	3.97726	87.8637	7.01229e-21	3.63981e-19	CEP55
ENSG00000180438.14	2.21933	3.16031	87.9849	6.59554e-21	3.46527e-19	TPRXL
ENSG00000138778.11	2.2087	4.52113	81.1929	2.04726e-19	8.34574e-18	CENPE
ENSG00000118257.16	2.2063	4.62879	43.6174	3.99275e-11	4.71741e-10	NRP2
ENSG00000029153.14	2.2053	6.35284	80.5404	2.84826e-19	1.13471e-17	ARNTL2
ENSG00000001626.14	2.19614	1.73701	9.66019	0.00188304	0.00481214	CFTR
ENSG00000124249.6	2.19389	0.768923	16.5315	4.78496e-05	0.00017564	KCNK15
ENSG00000103187.7	2.19282	3.76844	54.8614	1.29337e-13	2.33291e-12	COTL1
ENSG00000135439.11	2.1925	3.31581	35.84	2.14201e-09	1.83565e-08	AGAP2
ENSG00000072858.10	2.1886	1.16051	15.9837	6.38895e-05	0.000227838	SIDT1
ENSG00000269899.1	2.18799	0.869016	28.8745	7.72221e-08	4.94191e-07	RP11-589N15.2
ENSG00000007264.13	2.1843	0.239283	21.6293	3.30755e-06	1.54572e-05	MATK
ENSG00000131378.13	2.18173	3.53774	37.7216	8.15973e-10	7.54609e-09	RFTN1
ENSG00000224063.5	2.1805	1.79249	28.5965	8.91439e-08	5.62458e-07	AC007319.1
ENSG00000214110.3	2.17988	3.23305	34.1567	5.08473e-09	4.03764e-08	LDHAP4
ENSG00000121743.3	2.17855	1.65619	29.3306	6.10258e-08	3.97937e-07	GJA3
ENSG00000183671.12	2.17694	2.79712	46.6165	8.63311e-12	1.12552e-10	GPR1
ENSG00000130558.18	2.17354	4.20036	54.4972	1.55667e-13	2.76643e-12	OLFM1
ENSG00000154080.12	2.1735	0.574089	12.0023	0.000531342	0.00154251	CHST9
ENSG00000081181.7	2.1704	2.05255	35.0979	3.13538e-09	2.61038e-08	ARG2
ENSG00000143153.12	2.16957	6.574	59.7923	1.05417e-14	2.20941e-13	ATP1B1
ENSG00000075618.17	2.16782	7.75439	101.206	8.28881e-24	6.68723e-22	FSCN1
ENSG00000164045.11	2.1677	3.1345	105.467	9.64848e-25	8.49507e-23	CDC25A
ENSG00000232022.6	2.16716	0.848043	12.5126	0.000404217	0.00120745	FAAHP1
ENSG00000075035.9	2.1662	0.997721	10.5378	0.0011696	0.00313662	WSCD2
ENSG00000184731.5	2.16424	5.97787	149.843	1.87651e-34	4.76091e-32	FAM110C
ENSG00000198576.3	2.15686	3.33923	10.9971	0.000912548	0.00250616	ARC
ENSG00000147889.16	2.15545	0.243378	18.0864	2.11104e-05	8.37305e-05	CDKN2A
ENSG00000156587.15	2.15336	5.32084	71.0394	3.50169e-17	1.07174e-15	UBE2L6
ENSG00000147509.13	2.15251	1.72875	31.4231	2.075e-08	1.46611e-07	RGS20
ENSG00000256235.1	2.15023	1.06263	31.2233	2.29994e-08	1.61029e-07	SMIM3
ENSG00000153048.10	2.14656	5.77803	92.9644	5.32434e-22	3.23861e-20	CARHSP1
ENSG00000142945.12	2.14363	4.20431	119.787	7.0441e-28	9.17731e-26	KIF2C
ENSG00000107833.10	2.1421	3.78608	100.35	1.27735e-23	9.81266e-22	NPM3
ENSG00000151014.5	2.14188	3.91861	66.4481	3.59237e-16	9.16245e-15	CCRN4L
ENSG00000179593.15	2.1418	5.38909	51.6207	6.73274e-13	1.06149e-11	ALOX15B
ENSG00000174951.10	2.14115	4.25521	91.4605	1.13843e-21	6.63181e-20	FUT1
ENSG00000076706.14	2.13818	3.65037	27.9232	1.26227e-07	7.73653e-07	MCAM
ENSG00000163565.18	2.13779	7.76672	172.927	1.69762e-39	6.68032e-37	IFI16
ENSG00000101057.15	2.133	4.97415	115.015	7.81141e-27	9.24046e-25	MYBL2
ENSG00000256462.1	2.1315	3.03986	66.9302	2.81289e-16	7.31959e-15	RP11-116G8.5
ENSG00000105835.11	2.12749	7.62246	71.9571	2.19923e-17	6.90644e-16	NAMPT
ENSG00000184368.15	2.12636	2.10331	23.3802	1.32938e-06	6.70322e-06	MAP7D2
ENSG00000185306.12	2.12536	2.26417	38.9677	4.3087e-10	4.19597e-09	C12orf56
ENSG00000214595.11	2.12259	4.28714	56.4594	5.73711e-14	1.09311e-12	EML6
ENSG00000107518.16	2.11311	1.7259	21.7798	3.05797e-06	1.43779e-05	ATRNL1
ENSG00000254027.1	2.11085	0.0417262	49.3294	2.16395e-12	3.12314e-11	RP11-363E6.3
ENSG00000224945.1	2.11025	0.91805	33.3784	7.58633e-09	5.82555e-08	RP11-82L18.2
ENSG00000157827.19	2.1071	5.70171	85.0367	2.92883e-20	1.38416e-18	FMNL2
ENSG00000135698.9	2.10251	5.25014	134.549	4.14357e-31	7.60918e-29	MPHOSPH6
ENSG00000136514.2	2.0979	1.13868	50.0141	1.52644e-12	2.25022e-11	RTP4
ENSG00000237289.9	2.09616	5.24339	237.993	1.07736e-53	1.09335e-50	CKMT1B
ENSG00000037042.8	2.0953	3.8987	55.7692	8.14995e-14	1.50813e-12	TUBG2
ENSG00000134757.4	2.09293	9.57521	83.7426	5.63566e-20	2.55686e-18	DSG3
ENSG00000139629.15	2.08939	5.87025	50.2553	1.34989e-12	2.01249e-11	GALNT6
ENSG00000251331.6	2.08242	1.40888	38.4285	5.67959e-10	5.4068e-09	RP11-689K5.3
ENSG00000086205.16	2.07954	1.88336	22.5741	2.02195e-06	9.86768e-06	FOLH1
ENSG00000139055.6	2.07493	1.23022	24.061	9.33299e-07	4.84541e-06	ERP27
ENSG00000135363.11	2.07362	2.25417	40.2616	2.2213e-10	2.28555e-09	LMO2
ENSG00000133048.12	2.06894	5.69303	52.0348	5.45265e-13	8.74692e-12	CHI3L1
ENSG00000188613.6	2.06685	1.16345	39.1047	4.01684e-10	3.92762e-09	NANOS1
ENSG00000187840.4	2.06364	4.13782	129.853	4.41359e-30	7.33645e-28	EIF4EBP1
ENSG00000163219.11	2.06327	3.05538	58.3119	2.23683e-14	4.50214e-13	ARHGAP25
ENSG00000110446.9	2.05622	0.353053	36.8838	1.25384e-09	1.1224e-08	SLC15A3
ENSG00000261618.1	2.05287	2.55906	28.1125	1.14467e-07	7.08328e-07	RP11-79H23.3
ENSG00000124610.4	2.04898	3.63515	55.9936	7.27064e-14	1.3506e-12	HIST1H1A
ENSG00000165490.12	2.04852	3.22934	112.334	3.01869e-26	3.23369e-24	DDIAS
ENSG00000060558.3	2.04368	6.48309	133.087	8.65564e-31	1.45129e-28	GNA15
ENSG00000155465.18	2.04351	0.194864	29.1187	6.80765e-08	4.41079e-07	SLC7A7
ENSG00000086300.15	2.04227	1.02225	13.0244	0.00030746	0.000945526	SNX10
ENSG00000223572.9	2.04132	4.64266	124.366	7.00615e-29	1.03917e-26	CKMT1A
ENSG00000154839.9	2.03693	2.87754	64.4114	1.00974e-15	2.43954e-14	SKA1
ENSG00000136378.14	2.03511	0.510921	14.7672	0.000121635	0.000407253	ADAMTS7
ENSG00000112096.16	2.03487	8.52668	94.8814	2.02143e-22	1.32126e-20	SOD2
ENSG00000148082.9	2.03074	3.39562	39.6479	3.04129e-10	3.04003e-09	SHC3
ENSG00000003400.14	2.02704	4.1699	118.741	1.1932e-27	1.52366e-25	CASP10
ENSG00000164611.12	2.01861	4.54137	91.7575	9.79769e-22	5.74222e-20	PTTG1
ENSG00000108829.9	2.01779	6.71112	108.378	2.22109e-25	2.10971e-23	LRRC59
ENSG00000121858.10	2.01376	6.20377	97.7513	4.74384e-23	3.3878e-21	TNFSF10
ENSG00000162654.8	2.01143	2.6886	23.1366	1.50895e-06	7.53965e-06	GBP4
ENSG00000275183.1	2.01105	2.94518	75.2112	4.22967e-18	1.44348e-16	LENG9
ENSG00000110799.13	2.00883	2.53444	20.6826	5.42075e-06	2.42456e-05	VWF
ENSG00000115415.18	2.00817	7.78525	80.2069	3.37195e-19	1.32961e-17	STAT1
ENSG00000159247.12	2.00337	2.07233	16.3465	5.27533e-05	0.000191705	TUBBP5
ENSG00000123243.14	2.00262	1.78119	16.1393	5.8851e-05	0.00021171	ITIH5
ENSG00000090889.11	1.99955	3.73467	104.594	1.49877e-24	1.29015e-22	KIF4A
ENSG00000163191.5	1.99543	7.97913	66.2332	4.00609e-16	1.01135e-14	S100A11
ENSG00000100078.3	1.99341	5.47188	42.8439	5.92852e-11	6.76412e-10	PLA2G3
ENSG00000130234.10	1.99183	0.570264	32.6586	1.09854e-08	8.19419e-08	ACE2
ENSG00000121552.3	1.98974	7.51447	33.799	6.11091e-09	4.78792e-08	CSTA
ENSG00000065328.16	1.9874	3.27021	120.303	5.42945e-28	7.1706e-26	MCM10
ENSG00000158023.9	1.9856	2.84002	22.7147	1.87928e-06	9.22041e-06	WDR66
ENSG00000102886.14	1.98214	3.06484	22.7629	1.83274e-06	9.02425e-06	GDPD3
ENSG00000148926.9	1.97802	4.09172	33.4833	7.18797e-09	5.55282e-08	ADM
ENSG00000255690.2	1.97654	4.06757	26.1015	3.23937e-07	1.85291e-06	TRIL
ENSG00000242125.3	1.97286	6.16396	45.8334	1.28749e-11	1.64081e-10	SNHG3
ENSG00000090924.14	1.9631	4.19581	21.2389	4.05449e-06	1.85742e-05	PLEKHG2
ENSG00000173193.13	1.96216	6.36502	73.7123	9.03731e-18	2.97368e-16	PARP14
ENSG00000137462.6	1.96109	2.89736	66.186	4.10308e-16	1.03149e-14	TLR2
ENSG00000173083.14	1.95746	4.97703	49.6079	1.87752e-12	2.7302e-11	HPSE
ENSG00000111206.12	1.95713	5.0473	162.495	3.22556e-37	1.09114e-34	FOXM1
ENSG00000111981.4	1.95265	0.680876	8.98648	0.00271984	0.00665363	ULBP1
ENSG00000108179.13	1.95103	6.17456	109.502	1.26006e-25	1.22709e-23	PPIF
ENSG00000117228.9	1.94998	5.43587	79.2505	5.47125e-19	2.08491e-17	GBP1
ENSG00000077152.9	1.94788	1.88298	76.3848	2.33436e-18	8.18386e-17	UBE2T
ENSG00000086548.8	1.94693	2.289	10.9588	0.000931617	0.00255417	CEACAM6
ENSG00000148459.15	1.94571	3.11136	91.01	1.42944e-21	8.22762e-20	PDSS1
ENSG00000271361.1	1.94449	1.02054	7.573	0.00592492	0.0132935	HTATSF1P2
ENSG00000235847.2	1.94422	3.89344	25.8011	3.7848e-07	2.13138e-06	LDHAP7
ENSG00000069399.12	1.94279	5.36327	81.5203	1.73471e-19	7.16246e-18	BCL3
ENSG00000128165.8	1.94217	0.775463	25.533	4.34892e-07	2.4154e-06	ADM2
ENSG00000173805.15	1.94047	1.74606	16.4627	4.96157e-05	0.000181535	HAP1
ENSG00000117308.14	1.93954	3.61589	55.2633	1.05419e-13	1.92308e-12	GALE
ENSG00000250995.1	1.93401	0.686405	21.6773	3.22584e-06	1.51009e-05	RP13-128O4.3
ENSG00000188313.12	1.93379	4.75265	88.0814	6.28163e-21	3.30936e-19	PLSCR1
ENSG00000176769.9	1.93305	3.03599	11.0705	0.00087712	0.00242028	TCERG1L
ENSG00000105281.12	1.9325	6.2044	70.1457	5.50818e-17	1.63902e-15	SLC1A5
ENSG00000183010.16	1.92924	3.0903	44.4837	2.56478e-11	3.12605e-10	PYCR1
ENSG00000181938.13	1.92173	3.8867	111.567	4.44461e-26	4.63248e-24	GINS3
ENSG00000100336.17	1.92074	2.75528	7.29464	0.00691605	0.0152476	APOL4
ENSG00000278954.1	1.92018	0.625276	18.3573	1.83118e-05	7.34376e-05	RP13-415G19.2
ENSG00000093009.9	1.91946	2.85922	110.67	6.98865e-26	7.01849e-24	CDC45
ENSG00000131724.10	1.91837	6.48049	73.6838	9.1687e-18	3.01177e-16	IL13RA1
ENSG00000186603.5	1.91748	1.74199	46.4776	9.26706e-12	1.20247e-10	HPDL
ENSG00000165304.7	1.91645	3.94392	121.739	2.63325e-28	3.62674e-26	MELK
ENSG00000175063.16	1.9164	3.7784	78.1829	9.39261e-19	3.46951e-17	UBE2C
ENSG00000103034.14	1.91624	5.53546	52.6424	4.00166e-13	6.62887e-12	NDRG4
ENSG00000269968.1	1.91396	1.88855	56.0597	7.0302e-14	1.30972e-12	RP5-940J5.9
ENSG00000118322.12	1.91342	6.84443	31.5925	1.90164e-08	1.35154e-07	ATP10B
ENSG00000035499.12	1.91193	3.05434	70.1839	5.40269e-17	1.61511e-15	DEPDC1B
ENSG00000101084.16	1.91175	4.0764	105.529	9.35408e-25	8.27364e-23	C20orf24
ENSG00000198814.12	1.91135	4.5068	95.682	1.34899e-22	9.06312e-21	GK
ENSG00000142627.12	1.91129	7.07068	48.153	3.94235e-12	5.45703e-11	EPHA2
ENSG00000140368.12	1.91127	1.33764	42.9328	5.66529e-11	6.48297e-10	PSTPIP1
ENSG00000164620.8	1.90821	3.35488	95.7898	1.27753e-22	8.67372e-21	RELL2
ENSG00000129038.15	1.90725	3.86951	49.9701	1.56107e-12	2.296e-11	LOXL1
ENSG00000089685.14	1.90643	4.58769	82.8093	9.03642e-20	3.94209e-18	BIRC5
ENSG00000116649.9	1.9061	5.90413	141.005	1.60511e-32	3.32793e-30	SRM
ENSG00000157456.7	1.90459	4.09835	75.6419	3.40073e-18	1.16886e-16	CCNB2
ENSG00000107821.14	1.90373	0.867417	41.9883	9.18221e-11	1.0123e-09	KAZALD1
ENSG00000266709.1	1.90154	1.21447	29.5305	5.50426e-08	3.61366e-07	RP11-214O1.2
ENSG00000124107.5	1.89822	6.54376	42.4703	7.17645e-11	8.0791e-10	SLPI
ENSG00000161905.12	1.89133	0.969447	55.1225	1.13249e-13	2.05618e-12	ALOX15
ENSG00000181026.14	1.89027	4.44557	119.46	8.30689e-28	1.07499e-25	AEN
ENSG00000092853.13	1.88691	3.19398	53.5244	2.55399e-13	4.37887e-12	CLSPN
ENSG00000100504.16	1.88575	6.96979	87.2687	9.47363e-21	4.8198e-19	PYGL
ENSG00000172551.10	1.88382	3.57509	12.8976	0.000329001	0.00100408	MUCL1
ENSG00000101347.8	1.88354	4.50537	21.7979	3.02927e-06	1.42603e-05	SAMHD1
ENSG00000121152.9	1.88087	3.6118	112.3	3.07107e-26	3.27162e-24	NCAPH
ENSG00000174950.10	1.88076	3.18368	49.1526	2.36806e-12	3.40245e-11	CD164L2
ENSG00000105388.14	1.88022	2.47604	13.1543	0.000286861	0.000887984	CEACAM5
ENSG00000118193.11	1.87941	3.51825	60.2926	8.17535e-15	1.73801e-13	KIF14
ENSG00000170545.16	1.87776	5.34323	91.9939	8.69443e-22	5.15834e-20	SMAGP
ENSG00000247627.2	1.87502	2.09811	8.3613	0.00383296	0.00902517	MTND4P12
ENSG00000160213.5	1.87301	6.57331	71.8565	2.31425e-17	7.2323e-16	CSTB
ENSG00000130204.12	1.87274	6.2639	147.625	5.72851e-34	1.38071e-31	TOMM40
ENSG00000026652.13	1.87274	2.9612	38.8091	4.67334e-10	4.51686e-09	AGPAT4
ENSG00000173894.10	1.87257	4.36303	116.494	3.70473e-27	4.57914e-25	CBX2
ENSG00000131187.9	1.87167	3.14331	61.263	4.99381e-15	1.09173e-13	F12
ENSG00000261373.1	1.86718	2.72823	76.6191	2.07324e-18	7.32165e-17	VPS9D1-AS1
ENSG00000136531.13	1.86316	1.36273	8.06056	0.00452393	0.010453	SCN2A
ENSG00000155115.6	1.86235	4.46739	107.032	4.38108e-25	4.0036e-23	GTF3C6
ENSG00000006118.14	1.86199	3.14428	39.3262	3.58593e-10	3.53497e-09	TMEM132A
ENSG00000181381.13	1.86145	4.57806	48.5628	3.19887e-12	4.49567e-11	DDX60L
ENSG00000101871.14	1.85901	5.40164	123.71	9.75113e-29	1.4244e-26	MID1
ENSG00000198018.6	1.85595	5.6484	92.421	7.00654e-22	4.23511e-20	ENTPD7
ENSG00000142657.20	1.85501	7.06172	91.997	8.68093e-22	5.15834e-20	PGD
ENSG00000111907.20	1.85438	5.68245	133.441	7.24084e-31	1.24659e-28	TPD52L1
ENSG00000169679.14	1.85382	4.27156	95.6385	1.379e-22	9.20062e-21	BUB1
ENSG00000117724.12	1.85367	6.18625	35.7566	2.23571e-09	1.91001e-08	CENPF
ENSG00000177674.15	1.85232	4.29454	101.839	6.02256e-24	4.92064e-22	AGTRAP
ENSG00000214706.10	1.84852	5.39956	114.196	1.18051e-26	1.35492e-24	IFRD2
ENSG00000109321.10	1.84698	2.92463	11.5363	0.00068249	0.001931	AREG
ENSG00000168016.13	1.84679	4.58383	69.0336	9.68009e-17	2.76112e-15	TRANK1
ENSG00000100219.16	1.84671	6.58566	116.193	4.31302e-27	5.29705e-25	XBP1
ENSG00000178999.12	1.8458	3.60734	99.6294	1.8376e-23	1.39499e-21	AURKB
ENSG00000109971.13	1.84577	9.61214	79.5507	4.70017e-19	1.81621e-17	HSPA8
ENSG00000167553.14	1.84504	8.11683	103.258	2.94164e-24	2.48775e-22	TUBA1C
ENSG00000094804.9	1.84307	3.68416	111.676	4.2065e-26	4.40813e-24	CDC6
ENSG00000010438.16	1.84227	5.55944	78.9306	6.43307e-19	2.43698e-17	PRSS3
ENSG00000250479.8	1.84212	4.58849	70.1064	5.61899e-17	1.66429e-15	CHCHD10
ENSG00000149131.15	1.84157	3.21614	21.9203	2.84217e-06	1.34445e-05	SERPING1
ENSG00000074800.13	1.84148	9.83924	111.09	5.65365e-26	5.7986e-24	ENO1
ENSG00000105549.10	1.84023	0.224467	32.327	1.30293e-08	9.57439e-08	THEG
ENSG00000189057.10	1.83924	4.22622	54.8706	1.28731e-13	2.32416e-12	FAM111B
ENSG00000157110.15	1.83747	3.38411	78.1178	9.70765e-19	3.57219e-17	RBPMS
ENSG00000075218.18	1.83713	3.38006	67.163	2.49965e-16	6.56651e-15	GTSE1
ENSG00000205885.7	1.83691	3.77047	19.655	9.27586e-06	3.94972e-05	C1RL-AS1
ENSG00000162062.14	1.83681	1.46127	50.2786	1.33399e-12	1.99086e-11	C16orf59
ENSG00000166451.13	1.83656	3.64954	120.733	4.37189e-28	5.8137e-26	CENPN
ENSG00000171612.6	1.83592	2.22037	61.563	4.28807e-15	9.46024e-14	SLC25A33
ENSG00000178082.6	1.83315	1.20565	53.9223	2.08582e-13	3.63641e-12	TWF1P1
ENSG00000137807.13	1.82947	4.39173	73.8191	8.56131e-18	2.83641e-16	KIF23
ENSG00000132746.14	1.82937	8.29194	65.5154	5.76618e-16	1.42611e-14	ALDH3B2
ENSG00000181418.7	1.82897	0.181447	37.6499	8.46492e-10	7.80214e-09	DDN
ENSG00000065833.8	1.82896	6.04001	38.5107	5.44536e-10	5.20047e-09	ME1
ENSG00000034510.5	1.82847	7.26848	75.19	4.27521e-18	1.45644e-16	TMSB10
ENSG00000146733.13	1.82746	3.66955	61.9771	3.47472e-15	7.77258e-14	PSPH
ENSG00000102174.8	1.8269	0.785872	19.1376	1.21623e-05	5.05851e-05	PHEX
ENSG00000137168.7	1.8259	4.25374	89.3384	3.32734e-21	1.8175e-19	PPIL1
ENSG00000115556.13	1.8243	1.97345	35.6161	2.40298e-09	2.04722e-08	PLCD4
ENSG00000167207.11	1.82398	5.81659	38.0035	7.06177e-10	6.61637e-09	NOD2
ENSG00000131462.7	1.82366	5.58697	148.567	3.56695e-34	8.93219e-32	TUBG1
ENSG00000253626.3	1.82348	1.8153	24.413	7.77433e-07	4.10473e-06	EIF5AL1
ENSG00000198406.7	1.82261	0.740892	39.7885	2.8301e-10	2.84663e-09	BZW1P2
ENSG00000140511.11	1.82184	3.16228	82.3107	1.16289e-19	4.98286e-18	HAPLN3
ENSG00000106785.14	1.81975	6.17402	112.461	2.83227e-26	3.05094e-24	TRIM14
ENSG00000145386.9	1.81789	4.92842	61.7109	3.97762e-15	8.82584e-14	CCNA2
ENSG00000095585.16	1.81707	4.44802	41.2626	1.33093e-10	1.42178e-09	BLNK
ENSG00000187908.15	1.81524	0.10093	13.0237	0.000307572	0.000945717	DMBT1
ENSG00000157554.18	1.81385	1.71023	25.7119	3.96372e-07	2.21918e-06	ERG
ENSG00000139318.7	1.81268	4.70513	18.63	1.58703e-05	6.44642e-05	DUSP6
ENSG00000100290.2	1.81185	1.74254	59.3055	1.35001e-14	2.80809e-13	BIK
ENSG00000030110.12	1.8082	4.62867	95.1067	1.80391e-22	1.18713e-20	BAK1
ENSG00000118515.11	1.8082	7.75614	73.7819	8.72415e-18	2.88541e-16	SGK1
ENSG00000151948.11	1.80621	2.68744	60.9554	5.83832e-15	1.26346e-13	GLT1D1
ENSG00000235162.8	1.80567	4.61384	44.2388	2.90665e-11	3.51165e-10	C12orf75
ENSG00000071539.13	1.80497	3.11801	84.4462	3.94816e-20	1.83442e-18	TRIP13
ENSG00000111348.8	1.80362	5.65182	80.2376	3.31983e-19	1.31714e-17	ARHGDIB
ENSG00000151006.7	1.80073	2.57301	23.6074	1.18133e-06	6.01649e-06	PRSS53
ENSG00000167900.11	1.80052	4.64756	65.9327	4.66597e-16	1.1639e-14	TK1
ENSG00000132182.11	1.79992	5.20334	67.8378	1.77516e-16	4.83456e-15	NUP210
ENSG00000111885.6	1.79808	5.40825	65.9387	4.65168e-16	1.16184e-14	MAN1A1
ENSG00000136026.13	1.79448	7.63972	113.573	1.61593e-26	1.78048e-24	CKAP4
ENSG00000130589.16	1.79266	6.18109	51.0692	8.91667e-13	1.37435e-11	HELZ2
ENSG00000100911.13	1.7914	5.57702	211.96	5.13076e-48	4.12214e-45	PSME2
ENSG00000111110.11	1.78702	3.32841	10.2811	0.00134402	0.00354761	PPM1H
ENSG00000176014.12	1.78674	7.59596	87.8634	7.01354e-21	3.63981e-19	TUBB6
ENSG00000082014.16	1.78627	4.23338	61.74	3.9193e-15	8.70645e-14	SMARCD3
ENSG00000135451.12	1.78348	3.57872	108.516	2.07187e-25	1.97771e-23	TROAP
ENSG00000165175.15	1.78231	5.14552	82.9907	8.24419e-20	3.63763e-18	MID1IP1
ENSG00000103490.13	1.78059	5.9459	64.8373	8.13452e-16	1.98293e-14	PYCARD
ENSG00000198208.11	1.7798	2.23185	33.2477	8.11366e-09	6.18978e-08	RPS6KL1
ENSG00000198805.11	1.77973	5.80802	50.9485	9.48234e-13	1.45572e-11	PNP
ENSG00000100526.19	1.77972	2.54499	43.6099	4.00806e-11	4.7326e-10	CDKN3
ENSG00000186767.5	1.77911	3.61745	62.8409	2.24096e-15	5.1502e-14	SPIN4
ENSG00000005022.5	1.77779	8.42788	99.5877	1.87667e-23	1.41905e-21	SLC25A5
ENSG00000134490.13	1.77535	4.50654	96.8952	7.30973e-23	5.10675e-21	TMEM241
ENSG00000008513.14	1.77525	3.50431	19.194	1.18084e-05	4.92195e-05	ST3GAL1
ENSG00000065485.17	1.77364	3.11833	81.3062	1.93324e-19	7.93122e-18	PDIA5
ENSG00000160211.15	1.77108	6.08905	125.012	5.05894e-29	7.74178e-27	G6PD
ENSG00000072571.19	1.77063	3.50813	46.7363	8.12126e-12	1.06382e-10	HMMR
ENSG00000065600.12	1.76845	2.41547	62.2272	3.06033e-15	6.92598e-14	TMEM206
ENSG00000277287.1	1.76731	1.81301	47.2519	6.24243e-12	8.36459e-11	RP4-794I6.4
ENSG00000197982.13	1.767	3.86569	93.1485	4.8513e-22	2.99817e-20	C1orf122
ENSG00000159399.9	1.76632	6.97445	74.867	5.03514e-18	1.69733e-16	HK2
ENSG00000137975.7	1.76615	9.37697	83.6277	5.97305e-20	2.69094e-18	CLCA2
ENSG00000177700.5	1.76597	5.6003	83.5822	6.11197e-20	2.74072e-18	POLR2L
ENSG00000105559.11	1.76479	3.70131	50.144	1.4287e-12	2.11422e-11	PLEKHA4
ENSG00000277013.1	1.75989	4.66817	53.4548	2.64606e-13	4.52719e-12	CTC-526N19.1
ENSG00000130429.12	1.75969	4.62607	32.5729	1.14806e-08	8.524e-08	ARPC1B
ENSG00000101000.4	1.75837	2.88637	42.3831	7.50366e-11	8.41685e-10	PROCR
ENSG00000129235.10	1.75812	4.33877	84.7108	3.45365e-20	1.62423e-18	TXNDC17
ENSG00000080986.12	1.75581	3.29383	53.2829	2.88813e-13	4.88071e-12	NDC80
ENSG00000282508.1	1.75534	0.685078	19.3167	1.10734e-05	4.64167e-05	LINC01002
ENSG00000278463.1	1.75515	3.94998	47.7066	4.95013e-12	6.73121e-11	HIST1H2AB
ENSG00000072310.16	1.75373	7.65911	62.0851	3.28934e-15	7.41813e-14	SREBF1
ENSG00000125166.12	1.75267	6.93154	196.707	1.09276e-44	6.58459e-42	GOT2
ENSG00000176749.8	1.75242	3.97304	70.4592	4.69887e-17	1.41127e-15	CDK5R1
ENSG00000068489.12	1.75075	4.07836	64.4091	1.01089e-15	2.43954e-14	PRR11
ENSG00000152213.3	1.75011	1.00531	19.874	8.27196e-06	3.55234e-05	ARL11
ENSG00000198736.11	1.74951	4.81718	57.8642	2.8085e-14	5.54852e-13	MSRB1
ENSG00000088325.15	1.74907	5.5287	109.338	1.3683e-25	1.32581e-23	TPX2
ENSG00000145220.13	1.74831	3.17233	62.8776	2.19956e-15	5.0732e-14	LYAR
ENSG00000278952.1	1.74466	0.843875	15.1623	9.86557e-05	0.000337703	RP11-399J13.2
ENSG00000250889.2	1.74316	1.45103	38.4793	5.53369e-10	5.2822e-09	LINC01336
ENSG00000233903.2	1.74288	0.328637	42.259	7.99502e-11	8.91098e-10	Z83851.4
ENSG00000124215.16	1.74265	1.4791	24.5934	7.07925e-07	3.77599e-06	CDH26
ENSG00000103222.18	1.7402	6.99598	223.022	1.9824e-50	1.82022e-47	ABCC1
ENSG00000128641.17	1.73795	6.69661	40.3022	2.17558e-10	2.2445e-09	MYO1B
ENSG00000169684.13	1.73643	1.39467	39.6923	2.97295e-10	2.97789e-09	CHRNA5
ENSG00000205502.3	1.7364	0.742271	17.9407	2.27892e-05	8.96048e-05	C2CD4B
ENSG00000199377.1	1.73587	0.389294	6.83465	0.0089406	0.0190897	RNU5F-1
ENSG00000173227.13	1.73351	2.51423	49.5829	1.90163e-12	2.76316e-11	SYT12
ENSG00000258412.1	1.73199	0.204794	18.7102	1.52166e-05	6.20574e-05	RP11-404P21.5
ENSG00000213903.8	1.73041	7.81596	95.3127	1.62567e-22	1.07719e-20	LTB4R
ENSG00000270120.1	1.72965	1.16424	11.3856	0.000740171	0.00207592	RP11-327F22.6
ENSG00000171056.7	1.72742	5.71638	110.485	7.67392e-26	7.62725e-24	SOX7
ENSG00000100596.6	1.72316	7.43282	82.5526	1.02897e-19	4.45856e-18	SPTLC2
ENSG00000184985.16	1.72185	3.02444	16.4808	4.91462e-05	0.000179988	SORCS2
ENSG00000152056.16	1.72042	2.73915	44.982	1.9885e-11	2.46733e-10	AP1S3
ENSG00000164733.20	1.71572	8.50155	93.2322	4.6505e-22	2.89261e-20	CTSB
ENSG00000182057.4	1.71566	0.453891	46.0636	1.14478e-11	1.46961e-10	OGFRP1
ENSG00000124593.14	1.71113	3.08399	38.747	4.82451e-10	4.65597e-09	PRICKLE4
ENSG00000105131.7	1.7088	6.79522	44.4716	2.5808e-11	3.14154e-10	EPHX3
ENSG00000187678.8	1.70735	1.57604	18.293	1.89404e-05	7.57693e-05	SPRY4
ENSG00000064932.15	1.70718	7.41844	84.6046	3.64425e-20	1.7097e-18	SBNO2
ENSG00000158055.15	1.70344	7.2014	93.4139	4.24254e-22	2.656e-20	GRHL3
ENSG00000186185.13	1.70189	4.29363	76.3197	2.41271e-18	8.42786e-17	KIF18B
ENSG00000101224.17	1.70057	6.19601	86.7569	1.22718e-20	6.13017e-19	CDC25B
ENSG00000155918.7	1.69911	1.53467	20.0451	7.5639e-06	3.28041e-05	RAET1L
ENSG00000171793.13	1.69899	5.3201	129.683	4.80807e-30	7.92386e-28	CTPS1
ENSG00000198569.9	1.69751	0.00478766	7.94871	0.00481216	0.0110396	SLC34A3
ENSG00000172575.11	1.69651	6.02456	39.3492	3.54403e-10	3.49902e-09	RASGRP1
ENSG00000171314.8	1.69513	5.91631	133.205	8.1535e-31	1.37909e-28	PGAM1
ENSG00000188997.7	1.69429	3.20348	57.0974	4.14754e-14	8.0294e-13	KCTD21
ENSG00000131747.14	1.69338	6.74027	45.2621	1.72353e-11	2.14962e-10	TOP2A
ENSG00000111716.12	1.69275	5.31398	56.441	5.79109e-14	1.09797e-12	LDHB
ENSG00000149428.18	1.69203	6.80117	76.6078	2.08511e-18	7.35012e-17	HYOU1
ENSG00000197635.9	1.69131	3.53227	14.8339	0.000117405	0.000395209	DPP4
ENSG00000137812.19	1.69059	5.02356	58.4836	2.04995e-14	4.15637e-13	CASC5
ENSG00000197279.3	1.68767	1.98062	31.2397	2.2806e-08	1.59849e-07	ZNF165
ENSG00000136840.18	1.68713	2.24418	36.1412	1.83526e-09	1.59117e-08	ST6GALNAC4
ENSG00000022556.15	1.68708	3.82948	5.37141	0.0204694	0.0393785	NLRP2
ENSG00000166803.10	1.68587	3.1825	46.8038	7.84616e-12	1.02988e-10	KIAA0101
ENSG00000146670.9	1.68411	3.74631	82.2684	1.18805e-19	5.07937e-18	CDCA5
ENSG00000154914.16	1.68053	2.98191	59.266	1.37739e-14	2.85886e-13	USP43
ENSG00000109667.11	1.68011	3.45156	32.7107	1.06948e-08	7.9898e-08	SLC2A9
ENSG00000176153.11	1.67975	4.01349	35.5567	2.47728e-09	2.10427e-08	GPX2
ENSG00000132334.16	1.67947	5.14111	90.0853	2.28112e-21	1.27491e-19	PTPRE
ENSG00000104998.3	1.67912	2.23945	8.61071	0.00334192	0.00799292	IL27RA
ENSG00000109805.9	1.67749	4.12285	56.3783	5.97857e-14	1.12797e-12	NCAPG
ENSG00000122952.16	1.67638	4.29059	117.055	2.79148e-27	3.49516e-25	ZWINT
ENSG00000154518.9	1.67616	6.65662	111.177	5.41138e-26	5.57979e-24	ATP5G3
ENSG00000166794.4	1.67439	6.90033	96.7771	7.75896e-23	5.38159e-21	PPIB
ENSG00000029993.14	1.67275	5.00848	96.8102	7.6302e-23	5.31139e-21	HMGB3
ENSG00000214514.7	1.67183	1.88537	22.3388	2.28547e-06	1.10254e-05	KRT42P
ENSG00000278771.1	1.6714	5.99524	20.4243	6.20371e-06	2.74358e-05	Metazoa_SRP
ENSG00000125657.4	1.67082	1.92395	23.0118	1.61008e-06	8.00144e-06	TNFSF9
ENSG00000145050.15	1.67003	5.33226	93.6898	3.6905e-22	2.31792e-20	MANF
ENSG00000136695.14	1.66837	6.11479	14.1594	0.00016796	0.000545403	IL36RN
ENSG00000172366.19	1.66807	1.93456	43.5352	4.16397e-11	4.89571e-10	FAM195A
ENSG00000177238.13	1.6664	0.0848741	15.8651	6.80201e-05	0.000241332	TRIM72
ENSG00000262814.6	1.6653	3.66168	63.4514	1.64375e-15	3.82788e-14	MRPL12
ENSG00000261061.1	1.66517	1.56813	51.1905	8.3823e-13	1.29821e-11	RP11-303E16.2
ENSG00000165644.10	1.66217	4.11345	110.06	9.50837e-26	9.40207e-24	COMTD1
ENSG00000278921.2	1.65871	0.409599	37.6476	8.47491e-10	7.80388e-09	EPB41L4A-AS2
ENSG00000102575.10	1.6564	4.81835	43.8764	3.49774e-11	4.17089e-10	ACP5
ENSG00000176928.5	1.6541	4.48358	33.4059	7.47951e-09	5.75269e-08	GCNT4
ENSG00000173110.7	1.6537	2.71925	19.2302	1.15865e-05	4.83574e-05	HSPA6
ENSG00000138074.14	1.65362	4.85433	81.3726	1.86936e-19	7.6855e-18	SLC5A6
ENSG00000146950.12	1.64951	5.696	103.736	2.31119e-24	1.97187e-22	SHROOM2
ENSG00000013810.18	1.64848	4.58412	124.391	6.91833e-29	1.0341e-26	TACC3
ENSG00000105854.12	1.64815	6.38672	90.7825	1.60369e-21	9.14863e-20	PON2
ENSG00000236090.2	1.6455	1.01024	17.3487	3.11114e-05	0.000118884	LDHAP3
ENSG00000163032.11	1.64225	5.41998	66.215	4.0433e-16	1.01912e-14	VSNL1
ENSG00000263528.7	1.6406	5.01039	51.0392	9.05393e-13	1.39439e-11	IKBKE
ENSG00000173915.12	1.63923	4.7966	83.4368	6.57855e-20	2.93629e-18	USMG5
ENSG00000145194.17	1.6385	2.60445	82.2477	1.20057e-19	5.12153e-18	ECE2
ENSG00000183479.12	1.63758	3.38098	18.4001	1.79047e-05	7.19096e-05	TREX2
ENSG00000134690.10	1.63697	3.75341	95.907	1.20411e-22	8.20411e-21	CDCA8
ENSG00000049323.15	1.63636	5.50492	15.5752	7.92894e-05	0.000276316	LTBP1
ENSG00000196923.13	1.63587	4.8214	67.3094	2.32076e-16	6.15528e-15	PDLIM7
ENSG00000100918.12	1.63408	2.61408	23.0864	1.54886e-06	7.72708e-06	REC8
ENSG00000188015.9	1.63288	2.10115	22.3523	2.26944e-06	1.0959e-05	S100A3
ENSG00000150995.17	1.63141	3.32486	27.585	1.50339e-07	9.11008e-07	ITPR1
ENSG00000116663.10	1.63122	3.24264	50.3028	1.3176e-12	1.97252e-11	FBXO6
ENSG00000180198.15	1.63044	5.40821	127.089	1.77609e-29	2.85388e-27	RCC1
ENSG00000167114.12	1.62767	6.6989	71.7056	2.49821e-17	7.79459e-16	SLC27A4
ENSG00000229132.2	1.62707	0.0758384	36.4846	1.53876e-09	1.35295e-08	EIF4A1P10
ENSG00000130813.17	1.62626	4.76785	53.9826	2.02271e-13	3.5352e-12	C19orf66
ENSG00000223356.1	1.62618	0.39719	12.9293	0.000323479	0.000988639	RP11-66D17.5
ENSG00000197785.13	1.62548	4.46976	120.804	4.21908e-28	5.64946e-26	ATAD3A
ENSG00000112186.11	1.62541	1.24594	28.9798	7.31379e-08	4.70552e-07	CAP2
ENSG00000100949.14	1.62387	5.21054	153.047	3.74138e-35	1.0609e-32	RABGGTA
ENSG00000170312.15	1.62295	4.80365	78.7262	7.13439e-19	2.68159e-17	CDK1
ENSG00000147684.7	1.62031	5.10707	162.292	3.57228e-37	1.1876e-34	NDUFB9
ENSG00000158882.12	1.62007	4.12521	133.326	7.67247e-31	1.30921e-28	TOMM40L
ENSG00000152253.8	1.61969	2.34323	34.5868	4.07654e-09	3.29991e-08	SPC25
ENSG00000167034.9	1.61953	1.32808	12.3126	0.000449914	0.00132995	NKX3-1
ENSG00000105011.8	1.6185	3.36466	63.7981	1.37847e-15	3.2573e-14	ASF1B
ENSG00000260711.2	1.61803	3.50506	25.4989	4.42641e-07	2.45188e-06	RP11-747H7.3
ENSG00000172936.12	1.61747	6.12845	134.284	4.73526e-31	8.5332e-29	MYD88
ENSG00000185112.5	1.61736	5.04004	19.931	8.02871e-06	3.45789e-05	FAM43A
ENSG00000197956.9	1.61704	6.49776	28.4115	9.80801e-08	6.15419e-07	S100A6
ENSG00000156968.8	1.61605	2.78222	19.3867	1.06749e-05	4.49025e-05	MPV17L
ENSG00000197191.4	1.61545	4.29742	20.4091	6.25312e-06	2.76226e-05	CYSRT1
ENSG00000091490.10	1.6144	3.61562	50.5035	1.18951e-12	1.80481e-11	SEL1L3
ENSG00000176984.6	1.61339	0.0479958	17.9246	2.29829e-05	9.02744e-05	AP000679.2
ENSG00000163376.11	1.61213	2.23151	45.9752	1.1976e-11	1.53131e-10	KBTBD8
ENSG00000164211.12	1.61006	3.72953	33.3906	7.53868e-09	5.79358e-08	STARD4
ENSG00000235098.8	1.60896	2.58818	24.3444	8.05597e-07	4.23603e-06	ANKRD65
ENSG00000161981.10	1.60887	3.10334	60.6221	6.91537e-15	1.48819e-13	SNRNP25
ENSG00000111912.18	1.60834	5.76264	52.3121	4.73456e-13	7.71045e-12	NCOA7
ENSG00000137628.16	1.60682	5.81604	25.4506	4.53857e-07	2.50825e-06	DDX60
ENSG00000111665.11	1.6063	3.08452	74.0223	7.72391e-18	2.56338e-16	CDCA3
ENSG00000226415.1	1.60415	0.648762	38.2295	6.28939e-10	5.92437e-09	TPI1P1
ENSG00000163840.9	1.60145	6.20931	93.0886	5.00042e-22	3.08045e-20	DTX3L
ENSG00000112742.9	1.60124	4.25997	70.1663	5.45102e-17	1.62704e-15	TTK
ENSG00000200879.1	1.60075	0.773714	8.31542	0.00393099	0.00922221	SNORD14E
ENSG00000104611.11	1.5996	4.63784	86.3206	1.53009e-20	7.54556e-19	SH2D4A
ENSG00000123473.15	1.5994	4.36666	144.852	2.31391e-33	5.37551e-31	STIL
ENSG00000143502.14	1.5993	4.60301	39.0635	4.10251e-10	4.0053e-09	SUSD4
ENSG00000107201.9	1.59912	5.62465	47.8285	4.6517e-12	6.35227e-11	DDX58
ENSG00000253408.5	1.59833	0.00576115	30.2942	3.71233e-08	2.50722e-07	RP11-231D20.2
ENSG00000275126.1	1.59689	3.27968	46.9035	7.45687e-12	9.84144e-11	HIST1H4L
ENSG00000069535.13	1.59613	3.59038	11.3713	0.000745896	0.00209012	MAOB
ENSG00000033867.16	1.59468	5.07798	30.2983	3.70444e-08	2.50364e-07	SLC4A7
ENSG00000108551.4	1.59398	4.12682	27.4888	1.58003e-07	9.52665e-07	RASD1
ENSG00000113368.11	1.59375	5.7839	118.815	1.14968e-27	1.47788e-25	LMNB1
ENSG00000134851.12	1.59314	6.72015	107.043	4.35572e-25	3.99939e-23	TMEM165
ENSG00000037241.7	1.59122	2.57462	72.4082	1.74988e-17	5.56785e-16	RPL26L1
ENSG00000072110.13	1.5904	7.2358	19.4517	1.03175e-05	4.35417e-05	ACTN1
ENSG00000164087.7	1.58952	2.54784	80.583	2.78748e-19	1.11511e-17	POC1A
ENSG00000247077.6	1.5879	6.15208	91.0037	1.43407e-21	8.22966e-20	PGAM5
ENSG00000143127.12	1.58786	0.691944	12.5289	0.000400716	0.00119811	ITGA10
ENSG00000213906.9	1.58601	6.65609	91.0952	1.3692e-21	7.92252e-20	LTB4R2
ENSG00000128039.10	1.58527	5.48184	56.5555	5.46342e-14	1.04199e-12	SRD5A3
ENSG00000163170.11	1.58365	2.43247	50.3082	1.31398e-12	1.96862e-11	BOLA3
ENSG00000184182.18	1.58261	4.0876	84.4814	3.87844e-20	1.80638e-18	UBE2F
ENSG00000168938.5	1.5825	4.54956	67.196	2.45807e-16	6.46638e-15	PPIC
ENSG00000239672.7	1.58163	4.79966	89.3062	3.38193e-21	1.8421e-19	NME1
ENSG00000171954.12	1.58098	6.73427	26.6182	2.47894e-07	1.44714e-06	CYP4F22
ENSG00000105364.13	1.58011	5.99609	153.613	2.81447e-35	8.09979e-33	MRPL4
ENSG00000005059.15	1.57995	4.60317	90.0759	2.29201e-21	1.2773e-19	CCDC109B
ENSG00000233621.1	1.57947	3.18832	61.1974	5.16291e-15	1.12487e-13	LINC01137
ENSG00000171798.17	1.57827	0.994711	8.61982	0.00332525	0.00795701	KNDC1
ENSG00000165475.13	1.57721	3.44035	48.1385	3.97159e-12	5.48962e-11	CRYL1
ENSG00000110697.12	1.57603	4.57001	41.2603	1.33247e-10	1.42263e-09	PITPNM1
ENSG00000108691.9	1.57544	3.06864	9.49107	0.00206475	0.00522267	CCL2
ENSG00000127564.16	1.57478	3.88459	97.4337	5.56894e-23	3.93334e-21	PKMYT1
ENSG00000137563.11	1.57462	5.24864	45.8787	1.25808e-11	1.6065e-10	GGH
ENSG00000111640.14	1.57459	10.6684	73.5421	9.85111e-18	3.21403e-16	GAPDH
ENSG00000078237.5	1.57182	3.58332	33.7384	6.30452e-09	4.92959e-08	TIGAR
ENSG00000118242.15	1.56989	5.60661	65.3077	6.40695e-16	1.57776e-14	MREG
ENSG00000100644.16	1.56949	7.77957	66.718	3.13269e-16	8.06469e-15	HIF1A
ENSG00000263426.2	1.5686	3.48882	23.0215	1.602e-06	7.96536e-06	RN7SL471P
ENSG00000181634.7	1.568	2.04612	12.1688	0.000485951	0.00142424	TNFSF15
ENSG00000184216.11	1.56784	6.83304	89.551	2.98841e-21	1.64636e-19	IRAK1
ENSG00000158402.18	1.56769	1.87138	29.0638	7.00324e-08	4.5208e-07	CDC25C
ENSG00000015475.18	1.56754	3.49834	55.2637	1.05396e-13	1.92308e-12	BID
ENSG00000138772.12	1.56625	3.75411	11.3307	0.000762377	0.00213324	ANXA3
ENSG00000224621.1	1.56446	0.313587	15.1782	9.78251e-05	0.000335038	RP11-276H7.3
ENSG00000241322.8	1.56376	0.351819	18.2451	1.94229e-05	7.75065e-05	CDRT1
ENSG00000123136.14	1.56354	5.79837	142.082	9.33231e-33	2.02186e-30	DDX39A
ENSG00000131174.4	1.56269	5.87989	87.3897	8.91118e-21	4.5577e-19	COX7B
ENSG00000163218.14	1.56181	4.59556	19.1661	1.1982e-05	4.98999e-05	PGLYRP4
ENSG00000145569.5	1.56179	2.58769	23.4746	1.26571e-06	6.4191e-06	FAM105A
ENSG00000177098.8	1.56108	3.92448	16.0255	6.24935e-05	0.000223479	SCN4B
ENSG00000197299.10	1.56101	2.68825	44.0106	3.26598e-11	3.91124e-10	BLM
ENSG00000156970.12	1.56091	4.10008	61.9207	3.5757e-15	7.97993e-14	BUB1B
ENSG00000206341.7	1.5605	5.18956	9.90954	0.00164424	0.00426591	HLA-H
ENSG00000169299.13	1.56007	6.9266	87.2751	9.44307e-21	4.81696e-19	PGM2
ENSG00000144452.14	1.55987	8.87633	24.1174	9.06378e-07	4.71963e-06	ABCA12
ENSG00000185338.4	1.55738	3.03489	37.7587	8.00595e-10	7.42167e-09	SOCS1
ENSG00000188643.10	1.55557	8.69048	64.2418	1.10052e-15	2.63605e-14	S100A16
ENSG00000122035.6	1.5531	2.30036	48.6756	3.01999e-12	4.26916e-11	RASL11A
ENSG00000111669.14	1.55245	8.1952	112.557	2.69758e-26	2.92218e-24	TPI1
ENSG00000254858.9	1.55165	3.27107	91.0907	1.37233e-21	7.92252e-20	MPV17L2
ENSG00000184661.13	1.54926	3.81752	57.6746	3.09274e-14	6.05424e-13	CDCA2
ENSG00000072135.12	1.5481	5.07834	76.3865	2.3324e-18	8.18386e-17	PTPN18
ENSG00000254750.1	1.54646	3.67724	28.3954	9.89002e-08	6.19959e-07	CASP1P2
ENSG00000196139.11	1.54645	2.41866	20.0834	7.41361e-06	3.22176e-05	AKR1C3
ENSG00000117650.12	1.54535	2.98719	27.3469	1.7004e-07	1.01887e-06	NEK2
ENSG00000099800.7	1.54487	5.57708	102.067	5.36766e-24	4.42305e-22	TIMM13
ENSG00000127084.17	1.5448	2.98629	30.5569	3.24213e-08	2.21369e-07	FGD3
ENSG00000168078.9	1.54372	3.20134	36.1649	1.81303e-09	1.57402e-08	PBK
ENSG00000138028.14	1.54362	1.41989	17.8778	2.35552e-05	9.23153e-05	CGREF1
ENSG00000084207.15	1.54342	8.52366	94.6307	2.29427e-22	1.47954e-20	GSTP1
ENSG00000141424.12	1.54338	7.80408	118.646	1.25172e-27	1.58788e-25	SLC39A6
ENSG00000105538.8	1.54171	3.7608	27.9605	1.23817e-07	7.60329e-07	RASIP1
ENSG00000233198.3	1.54139	0.90483	9.67033	0.00187267	0.00479088	RNF224
ENSG00000197261.11	1.54079	2.77543	29.6628	5.14124e-08	3.38686e-07	C6orf141
ENSG00000246582.2	1.53982	1.51103	47.9469	4.37913e-12	6.01414e-11	RP11-1149O23.3
ENSG00000100280.16	1.53976	7.49578	103.234	2.9779e-24	2.50742e-22	AP1B1
ENSG00000144118.13	1.53898	5.64553	76.9946	1.71426e-18	6.09859e-17	RALB
ENSG00000023330.14	1.53841	5.46938	61.1325	5.33601e-15	1.15997e-13	ALAS1
ENSG00000097021.19	1.53744	5.0235	57.8251	2.86492e-14	5.6484e-13	ACOT7
ENSG00000139433.9	1.53703	9.60603	51.263	8.07828e-13	1.25415e-11	GLTP
ENSG00000120694.19	1.53645	6.75496	44.2997	2.81758e-11	3.41259e-10	HSPH1
ENSG00000117395.10	1.53614	5.10603	83.256	7.20863e-20	3.20269e-18	EBNA1BP2
ENSG00000135324.5	1.53595	1.68275	16.7127	4.34899e-05	0.000161575	MRAP2
ENSG00000143333.6	1.53297	0.231227	6.57103	0.0103652	0.0217478	RGS16
ENSG00000051128.18	1.53104	4.42098	48.2636	3.72609e-12	5.18373e-11	HOMER3
ENSG00000256433.2	1.52977	0.950934	15.1056	0.000101661	0.000346697	RP1-102E24.8
ENSG00000196743.8	1.5296	8.83385	74.3477	6.55021e-18	2.18893e-16	GM2A
ENSG00000121207.11	1.52903	0.457645	5.35141	0.0207055	0.0397811	LRAT
ENSG00000170454.5	1.52889	4.00667	7.23055	0.00716731	0.0157385	KRT75
ENSG00000119705.9	1.52861	4.34291	100.584	1.1349e-23	8.85958e-22	SLIRP
ENSG00000128578.9	1.52784	2.1251	18.4608	1.73438e-05	6.98313e-05	STRIP2
ENSG00000130164.11	1.52718	7.26167	29.8085	4.76899e-08	3.16652e-07	LDLR
ENSG00000166002.6	1.52644	2.48455	73.2672	1.13236e-17	3.66347e-16	SMCO4
ENSG00000163535.17	1.52501	3.35195	38.7207	4.88984e-10	4.71194e-09	SGOL2
ENSG00000165732.12	1.52435	8.0529	66.4633	3.56468e-16	9.10644e-15	DDX21
ENSG00000172269.16	1.5243	4.57499	54.4879	1.5641e-13	2.77706e-12	DPAGT1
ENSG00000177602.5	1.52312	2.35391	53.1366	3.11137e-13	5.23046e-12	GSG2
ENSG00000108561.8	1.52303	6.67287	97.8261	4.56797e-23	3.27433e-21	C1QBP
ENSG00000255587.7	1.52198	0.115687	12.1404	0.000493416	0.00144437	RAB44
ENSG00000189043.9	1.52144	5.8682	85.3233	2.53364e-20	1.21527e-18	NDUFA4
ENSG00000185043.10	1.51997	4.06066	47.0688	6.85392e-12	9.12059e-11	CIB1
ENSG00000221869.4	1.51929	6.47482	78.467	8.13442e-19	3.03969e-17	CEBPD
ENSG00000185803.8	1.51793	4.47231	72.3501	1.8021e-17	5.70803e-16	SLC52A2
ENSG00000165806.19	1.51768	5.4342	103.667	2.39328e-24	2.03292e-22	CASP7
ENSG00000176619.10	1.51589	6.87315	105.025	1.20621e-24	1.04297e-22	LMNB2
ENSG00000232445.1	1.51366	0.297583	10.8873	0.000968259	0.0026456	RP11-132A1.4
ENSG00000226950.6	1.51366	5.19623	99.851	1.64301e-23	1.25716e-21	DANCR
ENSG00000236983.1	1.51329	0.0857883	12.3708	0.000436103	0.00129309	LINC00614
ENSG00000150779.11	1.51288	4.20043	55.2967	1.0364e-13	1.896e-12	TIMM8B
ENSG00000241413.3	1.51135	1.0744	9.63882	0.00190507	0.00486345	RN7SL441P
ENSG00000204335.3	1.51116	0.547068	7.55024	0.00600021	0.0134405	SP5
ENSG00000197696.9	1.51033	0.948629	28.3688	1.00267e-07	6.27713e-07	NMB
ENSG00000062038.13	1.51006	7.8088	15.8114	6.99796e-05	0.000247314	CDH3
ENSG00000183208.12	1.50994	1.46847	28.9014	7.61561e-08	4.88017e-07	GDPGP1
ENSG00000171421.12	1.5092	3.4198	74.0441	7.63917e-18	2.53963e-16	MRPL36
ENSG00000276180.1	1.50855	2.93347	25.7305	3.92565e-07	2.2017e-06	HIST1H4I
ENSG00000213085.9	1.50815	1.81385	26.6372	2.45475e-07	1.43432e-06	CFAP45
ENSG00000178741.11	1.50808	5.59143	114.34	1.09754e-26	1.2826e-24	COX5A
ENSG00000123485.11	1.50768	3.6452	50.836	1.00413e-12	1.53786e-11	HJURP
ENSG00000159423.16	1.50635	4.99638	60.6749	6.7322e-15	1.45039e-13	ALDH4A1
ENSG00000198695.2	1.50568	4.39526	35.8132	2.17168e-09	1.85943e-08	MT-ND6
ENSG00000163931.15	1.50472	7.59794	62.0607	3.33036e-15	7.49311e-14	TKT
ENSG00000123975.4	1.50376	2.96939	57.3734	3.60447e-14	7.00618e-13	CKS2
ENSG00000148339.12	1.50083	5.15136	27.5201	1.55468e-07	9.38255e-07	SLC25A25
ENSG00000117226.11	1.5007	3.90821	50.4524	1.22091e-12	1.83919e-11	GBP3
ENSG00000108106.13	1.50023	3.87151	68.4523	1.29982e-16	3.58558e-15	UBE2S
ENSG00000272269.1	1.49954	0.0717232	15.7789	7.11929e-05	0.000251142	RP11-500C11.3
ENSG00000104356.10	1.49869	4.04327	102.842	3.62942e-24	3.02954e-22	POP1
ENSG00000165480.15	1.49652	3.20195	54.9453	1.23931e-13	2.24379e-12	SKA3
ENSG00000106683.14	1.49601	4.83711	76.4567	2.251e-18	7.92039e-17	LIMK1
ENSG00000198937.8	1.49574	1.76358	25.8211	3.7458e-07	2.11127e-06	CCDC167
ENSG00000130816.14	1.49516	6.52077	177.066	2.11865e-40	9.2845e-38	DNMT1
ENSG00000251455.1	1.49448	1.96211	19.2421	1.15146e-05	4.81093e-05	RP11-164P12.3
ENSG00000153395.9	1.49272	4.65868	43.8329	3.57637e-11	4.25676e-10	LPCAT1
ENSG00000147697.8	1.49233	6.37385	36.3245	1.67048e-09	1.46104e-08	GSDMC
ENSG00000106105.13	1.49127	7.0202	86.4811	1.4108e-20	7.02922e-19	GARS
ENSG00000213928.8	1.48996	3.10018	16.7455	4.27443e-05	0.000159111	IRF9
ENSG00000112146.16	1.4893	6.30296	115.829	5.18118e-27	6.32301e-25	FBXO9
ENSG00000123892.11	1.48742	6.36312	92.3664	7.20259e-22	4.32649e-20	RAB38
ENSG00000168610.14	1.48559	8.81925	50.6254	1.11787e-12	1.70259e-11	STAT3
ENSG00000044574.7	1.48558	8.17549	78.8408	6.73236e-19	2.54038e-17	HSPA5
ENSG00000256269.6	1.48556	3.91952	64.9644	7.62647e-16	1.8638e-14	HMBS
ENSG00000107954.10	1.48444	0.825654	11.7113	0.00062122	0.00177615	NEURL1
ENSG00000203760.8	1.4838	2.4335	37.3085	1.00846e-09	9.15497e-09	CENPW
ENSG00000154723.12	1.47993	4.09024	82.3833	1.12099e-19	4.82478e-18	ATP5J
ENSG00000277791.4	1.47871	5.60453	81.5413	1.7164e-19	7.10205e-18	PSMB3
ENSG00000124787.13	1.47772	3.12317	43.9581	3.35474e-11	4.00533e-10	RPP40
ENSG00000138646.8	1.4772	2.14405	19.9679	7.87535e-06	3.40019e-05	HERC5
ENSG00000166171.12	1.47594	2.17434	44.186	2.98607e-11	3.59405e-10	DPCD
ENSG00000171320.14	1.47492	2.86303	50.478	1.2051e-12	1.82175e-11	ESCO2
ENSG00000111602.11	1.47386	4.84989	107.797	2.97699e-25	2.78652e-23	TIMELESS
ENSG00000163584.17	1.47263	4.8588	30.6873	3.03148e-08	2.08166e-07	RPL22L1
ENSG00000089327.14	1.47194	3.66331	23.977	9.74947e-07	5.04398e-06	FXYD5
ENSG00000155368.16	1.47161	6.24916	40.0306	2.50019e-10	2.54668e-09	DBI
ENSG00000167799.9	1.47132	3.87245	39.0449	4.1417e-10	4.04151e-09	NUDT8
ENSG00000125844.15	1.46963	6.09937	66.7458	3.08882e-16	7.97305e-15	RRBP1
ENSG00000174371.16	1.46948	3.23457	53.866	2.14643e-13	3.73197e-12	EXO1
ENSG00000169230.9	1.46769	6.44757	65.4516	5.95586e-16	1.47043e-14	PRELID1
ENSG00000115129.13	1.46489	2.85741	58.226	2.33671e-14	4.68362e-13	TP53I3
ENSG00000169020.9	1.46236	4.09847	79.3118	5.30426e-19	2.0293e-17	ATP5I
ENSG00000101182.14	1.46101	6.20675	92.9897	5.25664e-22	3.21773e-20	PSMA7
ENSG00000155846.16	1.46041	6.58628	54.6397	1.44778e-13	2.58963e-12	PPARGC1B
ENSG00000185624.14	1.45752	9.54912	71.9682	2.18697e-17	6.87915e-16	P4HB
ENSG00000140105.17	1.45735	5.97571	54.4685	1.57959e-13	2.802e-12	WARS
ENSG00000125434.10	1.45631	1.90236	37.3497	9.87374e-10	8.97621e-09	SLC25A35
ENSG00000198901.13	1.45578	5.66921	79.0746	5.98086e-19	2.27461e-17	PRC1
ENSG00000145623.12	1.45471	6.07986	68.79	1.09528e-16	3.09042e-15	OSMR
ENSG00000184076.12	1.45353	5.1649	75.5451	3.5715e-18	1.22319e-16	UQCR10
ENSG00000196954.12	1.45203	6.20379	83.3803	6.76923e-20	3.01442e-18	CASP4
ENSG00000109736.14	1.45085	4.72153	98.3232	3.55374e-23	2.62541e-21	MFSD10
ENSG00000227959.1	1.45055	1.01189	36.0008	1.9724e-09	1.70089e-08	RP11-276H7.2
ENSG00000042753.11	1.45047	5.67729	63.8598	1.33593e-15	3.16067e-14	AP2S1
ENSG00000120738.7	1.45026	8.46059	15.7046	7.4042e-05	0.000259994	EGR1
ENSG00000147324.10	1.44965	6.78565	103.845	2.188e-24	1.87506e-22	MFHAS1
ENSG00000128487.16	1.44936	4.5462	31.412	2.08688e-08	1.47396e-07	SPECC1
ENSG00000125430.8	1.44925	3.40348	51.3412	7.76295e-13	1.20909e-11	HS3ST3B1
ENSG00000129810.14	1.44843	2.7166	36.5163	1.51394e-09	1.33479e-08	SGOL1
ENSG00000256663.1	1.44686	0.140822	26.8232	2.22939e-07	1.31379e-06	RP11-424C20.2
ENSG00000128626.11	1.44622	4.34488	77.8738	1.0984e-18	4.01885e-17	MRPS12
ENSG00000173442.11	1.44581	6.34553	77.122	1.60719e-18	5.74949e-17	EHBP1L1
ENSG00000166394.14	1.44533	5.62476	41.7167	1.05504e-10	1.14675e-09	CYB5R2
ENSG00000158966.13	1.44465	6.18406	41.2969	1.30777e-10	1.40013e-09	CACHD1
ENSG00000175701.10	1.4442	3.4437	87.8894	6.92175e-21	3.61694e-19	LINC00116
ENSG00000210117.1	1.44287	1.0174	14.6462	0.000129697	0.000431646	MT-TW
ENSG00000148334.14	1.44178	5.38276	177.606	1.61476e-40	7.24088e-38	PTGES2
ENSG00000161888.11	1.44161	3.07088	41.0062	1.5175e-10	1.60156e-09	SPC24
ENSG00000121621.6	1.44149	3.12406	36.1272	1.84846e-09	1.60189e-08	KIF18A
ENSG00000276368.1	1.44106	5.70944	42.2424	8.06309e-11	8.98166e-10	HIST1H2AJ
ENSG00000107338.9	1.44097	3.82343	54.7298	1.3829e-13	2.4851e-12	SHB
ENSG00000151689.12	1.4398	5.58866	50.0673	1.48563e-12	2.19341e-11	INPP1
ENSG00000166411.13	1.43591	6.49556	134.225	4.87794e-31	8.70893e-29	IDH3A
ENSG00000144063.3	1.43533	4.04275	17.9288	2.29321e-05	9.01116e-05	MALL
ENSG00000134684.10	1.43491	6.34832	96.9748	7.02164e-23	4.92332e-21	YARS
ENSG00000198618.5	1.43457	3.82158	56.411	5.87998e-14	1.11155e-12	PPIAP22
ENSG00000137033.11	1.43424	6.2494	28.7519	8.22675e-08	5.22835e-07	IL33
ENSG00000115107.19	1.43369	5.04176	47.3953	5.80223e-12	7.83464e-11	STEAP3
ENSG00000116898.11	1.43269	5.10948	74.4362	6.26299e-18	2.09658e-16	MRPS15
ENSG00000115221.10	1.43261	3.92528	43.5617	4.10799e-11	4.83874e-10	ITGB6
ENSG00000103005.11	1.43255	4.46328	88.8799	4.19526e-21	2.27868e-19	USB1
ENSG00000168237.17	1.43012	2.4487	35.6963	2.30607e-09	1.96751e-08	GLYCTK
ENSG00000143977.13	1.42969	4.64099	71.4926	2.78305e-17	8.62746e-16	SNRPG
ENSG00000101444.12	1.42832	6.60387	80.7323	2.58466e-19	1.03828e-17	AHCY
ENSG00000132589.15	1.42745	6.69651	77.0377	1.6773e-18	5.98919e-17	FLOT2
ENSG00000131019.10	1.42629	0.0261097	15.3236	9.05798e-05	0.000311941	ULBP3
ENSG00000100170.9	1.42462	5.80182	9.77369	0.00177027	0.00455671	SLC5A1
ENSG00000164077.13	1.42438	3.85711	65.0546	7.28519e-16	1.78265e-14	MON1A
ENSG00000215875.4	1.42323	0.567782	7.89726	0.00495097	0.0113204	ST13P20
ENSG00000175147.11	1.42235	2.15615	22.9081	1.69935e-06	8.42079e-06	TMEM51-AS1
ENSG00000137094.14	1.42142	3.13843	43.3878	4.4898e-11	5.23096e-10	DNAJB5
ENSG00000099337.4	1.42121	6.6295	60.8121	6.27908e-15	1.3558e-13	KCNK6
ENSG00000164405.10	1.42038	5.18506	83.6851	5.80196e-20	2.61999e-18	UQCRQ
ENSG00000179218.13	1.42038	8.95514	58.446	2.08952e-14	4.21444e-13	CALR
ENSG00000237149.5	1.41936	2.30358	32.7692	1.03776e-08	7.78262e-08	ZNF503-AS2
ENSG00000125995.15	1.41845	3.93044	41.872	9.74482e-11	1.07004e-09	ROMO1
ENSG00000243989.7	1.41792	1.6246	40.2754	2.20564e-10	2.27186e-09	ACY1
ENSG00000064666.14	1.4173	7.52649	45.2933	1.69626e-11	2.12107e-10	CNN2
ENSG00000198780.11	1.41657	2.34478	16.8677	4.0077e-05	0.000150197	FAM169A
ENSG00000278291.1	1.41632	2.14795	15.7568	7.20269e-05	0.000253759	RP11-172H24.4
ENSG00000217648.1	1.41513	0.501473	34.1576	5.08247e-09	4.03764e-08	RP1-95L4.4
ENSG00000050344.8	1.41337	4.91923	25.411	4.63261e-07	2.55363e-06	NFE2L3
ENSG00000165633.12	1.41304	3.94226	18.6547	1.56662e-05	6.37695e-05	VSTM4
ENSG00000251322.7	1.41303	3.61395	26.0889	3.26061e-07	1.8634e-06	SHANK3
ENSG00000085840.12	1.41277	3.35476	50.4392	1.22913e-12	1.84867e-11	ORC1
ENSG00000255501.1	1.41251	2.57672	10.0163	0.0015516	0.00404525	CARD18
ENSG00000185561.9	1.41235	3.92438	56.1538	6.70171e-14	1.25459e-12	TLCD2
ENSG00000250148.1	1.41151	0.814342	8.84041	0.00294633	0.00716009	KRT8P31
ENSG00000177409.11	1.41149	2.54165	21.2408	4.05059e-06	1.85651e-05	SAMD9L
ENSG00000169258.6	1.41048	3.27138	36.0349	1.93819e-09	1.67288e-08	GPRIN1
ENSG00000144485.10	1.40981	0.336487	26.0442	3.33685e-07	1.90414e-06	HES6
ENSG00000164032.11	1.40964	6.3282	60.2469	8.36765e-15	1.77693e-13	H2AFZ
ENSG00000222047.8	1.40892	1.55318	22.8029	1.79496e-06	8.84726e-06	C10orf55
ENSG00000169607.12	1.40887	3.69664	33.1719	8.43608e-09	6.41422e-08	CKAP2L
ENSG00000167536.13	1.40868	3.75532	66.2326	4.00722e-16	1.01135e-14	DHRS13
ENSG00000276043.4	1.40866	4.31864	90.5849	1.7721e-21	1.00204e-19	UHRF1
ENSG00000278272.1	1.40844	5.72699	43.0961	5.21152e-11	5.99932e-10	HIST1H3C
ENSG00000197965.11	1.40838	7.24138	54.5165	1.54148e-13	2.74196e-12	MPZL1
ENSG00000269386.5	1.40834	3.06346	34.0786	5.29291e-09	4.18957e-08	RAB11B-AS1
ENSG00000221955.10	1.40816	2.74046	27.6932	1.42159e-07	8.65248e-07	SLC12A8
ENSG00000171227.6	1.40802	2.57627	32.9642	9.38718e-09	7.08984e-08	TMEM37
ENSG00000115267.5	1.40705	5.16247	50.4895	1.19807e-12	1.81328e-11	IFIH1
ENSG00000076382.16	1.40701	4.24101	86.8175	1.19015e-20	5.97615e-19	SPAG5
ENSG00000114859.14	1.40531	2.57669	41.375	1.25654e-10	1.34904e-09	CLCN2
ENSG00000173599.13	1.4048	4.56126	50.7398	1.05461e-12	1.60878e-11	PC
ENSG00000162302.12	1.40471	6.3212	80.2173	3.35416e-19	1.32531e-17	RPS6KA4
ENSG00000149925.16	1.40462	9.51557	81.6431	1.63018e-19	6.78902e-18	ALDOA
ENSG00000186654.20	1.40452	3.38385	52.0881	5.30662e-13	8.52685e-12	PRR5
ENSG00000197766.7	1.4045	3.22487	12.2775	0.000458445	0.00135309	CFD
ENSG00000111639.7	1.40368	5.19331	73.064	1.25511e-17	4.03352e-16	MRPL51
ENSG00000113407.13	1.40112	6.38692	109.162	1.49535e-25	1.43449e-23	TARS
ENSG00000165025.14	1.40071	6.11826	64.8215	8.19986e-16	1.99633e-14	SYK
ENSG00000171310.10	1.40012	2.35574	12.6137	0.000382936	0.0011519	CHST11
ENSG00000150630.3	1.39901	0.254947	7.04039	0.00796916	0.0172809	VEGFC
ENSG00000258643.5	1.39836	0.50429	20.6353	5.55632e-06	2.4783e-05	BCL2L2-PABPN1
ENSG00000033050.7	1.39813	6.03398	115.599	5.81754e-27	6.96731e-25	ABCF2
ENSG00000186940.6	1.3967	0.118365	15.5863	7.88221e-05	0.000274904	CHCHD2P9
ENSG00000112494.9	1.39636	3.84881	11.2119	0.000812732	0.00226069	UNC93A
ENSG00000075643.5	1.39609	4.10229	26.8213	2.23161e-07	1.31468e-06	MOCOS
ENSG00000075399.12	1.39581	4.69358	59.6476	1.13455e-14	2.37014e-13	VPS9D1
ENSG00000155380.11	1.39484	5.75173	21.6496	3.27285e-06	1.53024e-05	SLC16A1
ENSG00000090339.8	1.39482	2.40495	7.69379	0.00554111	0.0125124	ICAM1
ENSG00000139579.12	1.39479	4.84192	63.4996	1.60397e-15	3.73976e-14	NABP2
ENSG00000105220.14	1.39263	8.23611	68.9054	1.03303e-16	2.9379e-15	GPI
ENSG00000136159.3	1.39179	4.54379	72.0457	2.10275e-17	6.62503e-16	NUDT15
ENSG00000166197.16	1.39107	6.77128	56.9484	4.47401e-14	8.61817e-13	NOLC1
ENSG00000171241.8	1.39032	3.23814	35.0216	3.26063e-09	2.70299e-08	SHCBP1
ENSG00000142634.12	1.38763	6.60946	88.5217	5.02814e-21	2.67825e-19	EFHD2
ENSG00000108932.11	1.38395	4.59613	33.296	7.91448e-09	6.05583e-08	SLC16A6
ENSG00000103257.8	1.38394	7.36234	22.7459	1.84897e-06	9.09253e-06	SLC7A5
ENSG00000144867.11	1.38384	5.52997	82.0367	1.33585e-19	5.67352e-18	SRPRB
ENSG00000141527.16	1.38336	5.50753	20.6875	5.40685e-06	2.4189e-05	CARD14
ENSG00000123609.10	1.38332	3.9243	66.3479	3.77961e-16	9.5641e-15	NMI
ENSG00000261286.1	1.38287	1.20395	9.68995	0.00185279	0.00474441	RP11-517C16.2
ENSG00000196839.12	1.3826	1.992	17.6641	2.6356e-05	0.000102294	ADA
ENSG00000082153.17	1.38249	7.02534	70.719	4.11901e-17	1.24487e-15	BZW1
ENSG00000100139.13	1.38228	7.7928	97.9508	4.28903e-23	3.09742e-21	MICALL1
ENSG00000168393.12	1.38207	3.6884	61.2834	4.94242e-15	1.08172e-13	DTYMK
ENSG00000167797.7	1.37987	4.04114	87.2346	9.63814e-21	4.8906e-19	CDK2AP2
ENSG00000254986.7	1.37963	5.04718	134.651	3.93626e-31	7.29798e-29	DPP3
ENSG00000228716.6	1.37931	4.353	36.4374	1.57652e-09	1.383e-08	DHFR
ENSG00000100567.12	1.37877	5.6618	56.0256	7.15336e-14	1.3301e-12	PSMA3
ENSG00000088726.15	1.37861	5.61183	47.5814	5.27678e-12	7.15017e-11	TMEM40
ENSG00000142684.7	1.37812	3.5666	67.7692	1.83799e-16	4.99157e-15	ZNF593
ENSG00000134809.8	1.378	3.77811	88.4597	5.18814e-21	2.75586e-19	TIMM10
ENSG00000170379.19	1.37572	3.27913	37.4911	9.18288e-10	8.39963e-09	TCAF2
ENSG00000027697.12	1.37468	6.8859	91.764	9.76561e-22	5.74087e-20	IFNGR1
ENSG00000173660.11	1.3743	4.9462	78.5256	7.89676e-19	2.95661e-17	UQCRH
ENSG00000186193.8	1.37429	4.5764	42.1086	8.63428e-11	9.56817e-10	SAPCD2
ENSG00000139988.9	1.37397	6.25335	33.7214	6.35963e-09	4.9597e-08	RDH12
ENSG00000152413.14	1.37383	5.21509	79.8105	4.12106e-19	1.60855e-17	HOMER1
ENSG00000228544.1	1.37242	2.31884	24.4399	7.66662e-07	4.05563e-06	CCDC183-AS1
ENSG00000134308.13	1.37237	8.40897	58.266	2.28963e-14	4.59881e-13	YWHAQ
ENSG00000231890.7	1.37217	1.86528	30.1316	4.03691e-08	2.71313e-07	DARS-AS1
ENSG00000152669.8	1.37132	1.73604	35.5924	2.43234e-09	2.06974e-08	CCNO
ENSG00000162063.12	1.37121	4.72411	77.3485	1.43303e-18	5.19393e-17	CCNF
ENSG00000143228.12	1.37112	2.99616	32.8776	9.81454e-09	7.38657e-08	NUF2
ENSG00000129173.12	1.36671	4.20339	37.8077	7.80747e-10	7.25353e-09	E2F8
ENSG00000186792.15	1.36631	1.83296	28.3361	1.01976e-07	6.37373e-07	HYAL3
ENSG00000063241.7	1.36479	4.7746	85.9664	1.8302e-20	8.93414e-19	ISOC2
ENSG00000102743.14	1.36376	2.81446	40.1288	2.37763e-10	2.43471e-09	SLC25A15
ENSG00000066279.16	1.36326	6.31185	31.4625	2.03333e-08	1.43772e-07	ASPM
ENSG00000181163.13	1.36305	8.13578	76.3632	2.36009e-18	8.25903e-17	NPM1
ENSG00000128283.6	1.36221	7.27879	56.1239	6.80447e-14	1.27012e-12	CDC42EP1
ENSG00000167106.11	1.36129	7.32201	83.044	8.02484e-20	3.55713e-18	FAM102A
ENSG00000155287.10	1.35974	5.17957	110.604	7.22654e-26	7.2198e-24	SLC25A28
ENSG00000101935.9	1.35928	6.12146	54.1097	1.89605e-13	3.32663e-12	AMMECR1
ENSG00000132768.13	1.35871	4.80361	93.2179	4.68428e-22	2.90425e-20	DPH2
ENSG00000170745.11	1.35863	3.74495	10.522	0.00117962	0.00316173	KCNS3
ENSG00000235109.7	1.35734	3.26908	29.9601	4.4104e-08	2.94668e-07	ZSCAN31
ENSG00000273703.1	1.35734	3.6594	40.4295	2.03836e-10	2.1131e-09	HIST1H2BM
ENSG00000108439.9	1.35727	5.01045	87.7179	7.54876e-21	3.89185e-19	PNPO
ENSG00000275713.1	1.35647	4.9746	43.2882	4.72413e-11	5.4742e-10	HIST1H2BH
ENSG00000251381.6	1.35597	4.25341	20.3598	6.41624e-06	2.82784e-05	LINC00958
ENSG00000156411.9	1.35592	5.00647	89.6773	2.80359e-21	1.55341e-19	C14orf2
ENSG00000125454.11	1.35553	2.41866	38.3029	6.05739e-10	5.71931e-09	SLC25A19
ENSG00000125912.10	1.35509	5.98653	82.7925	9.11344e-20	3.96671e-18	NCLN
ENSG00000160703.15	1.35418	6.17684	29.7951	4.80193e-08	3.18512e-07	NLRX1
ENSG00000181019.12	1.35214	2.82836	21.6081	3.34439e-06	1.5599e-05	NQO1
ENSG00000141098.12	1.35098	5.26759	41.1924	1.37957e-10	1.46885e-09	GFOD2
ENSG00000099901.16	1.34853	5.61438	79.5839	4.62167e-19	1.78946e-17	RANBP1
ENSG00000164638.10	1.34833	2.32455	14.5369	0.000137444	0.000454657	SLC29A4
ENSG00000104812.14	1.34815	6.51462	65.7689	5.07008e-16	1.26144e-14	GYS1
ENSG00000107798.17	1.34799	5.55429	88.8122	4.34126e-21	2.35135e-19	LIPA
ENSG00000101447.13	1.34655	4.17737	40.3611	2.11101e-10	2.18254e-09	FAM83D
ENSG00000185880.12	1.34625	5.13389	64.3238	1.05562e-15	2.5443e-14	TRIM69
ENSG00000131979.18	1.34612	4.65659	70.9552	3.65438e-17	1.1167e-15	GCH1
ENSG00000132507.17	1.34561	8.71067	60.5627	7.12728e-15	1.52868e-13	EIF5A
ENSG00000114023.15	1.34544	5.97982	60.7152	6.596e-15	1.42264e-13	FAM162A
ENSG00000259529.1	1.34543	1.0238	10.5784	0.00114415	0.00307519	RP11-468E2.4
ENSG00000243708.8	1.34465	2.08844	12.8487	0.000337717	0.0010284	PLA2G4B
ENSG00000063176.15	1.34286	3.12928	79.752	4.24477e-19	1.65349e-17	SPHK2
ENSG00000168398.6	1.34275	4.09463	37.5197	9.0492e-10	8.29704e-09	BDKRB2
ENSG00000163399.15	1.34255	9.5875	66.6015	3.32327e-16	8.53252e-15	ATP1A1
ENSG00000170426.1	1.34242	5.23823	18.2628	1.92426e-05	7.6835e-05	SDR9C7
ENSG00000142507.9	1.34087	5.87041	74.4746	6.1423e-18	2.05975e-16	PSMB6
ENSG00000183520.11	1.34078	5.17975	94.7724	2.13587e-22	1.38922e-20	UTP11L
ENSG00000188508.10	1.34058	9.97613	21.0428	4.4913e-06	2.04056e-05	KRTDAP
ENSG00000273983.1	1.34054	5.95576	32.4913	1.19724e-08	8.86871e-08	HIST1H3G
ENSG00000111641.10	1.34014	5.65975	94.6184	2.30858e-22	1.4838e-20	NOP2
ENSG00000100804.18	1.34009	5.77096	58.7381	1.80117e-14	3.68294e-13	PSMB5
ENSG00000168528.11	1.34007	6.08713	32.1426	1.43262e-08	1.04359e-07	SERINC2
ENSG00000162639.15	1.3397	2.07497	20.3564	6.42783e-06	2.8323e-05	HENMT1
ENSG00000279069.1	1.33964	0.552763	29.9173	4.50863e-08	3.00607e-07	RP11-159D12.6
ENSG00000277149.4	1.33948	2.65744	20.3138	6.57249e-06	2.88812e-05	TYW1B
ENSG00000088367.20	1.33895	5.63261	63.5703	1.54746e-15	3.62113e-14	EPB41L1
ENSG00000226666.1	1.33785	0.304288	21.9199	2.84271e-06	1.34445e-05	HSPA9P1
ENSG00000149054.14	1.33745	1.29538	19.7777	8.69895e-06	3.72161e-05	ZNF215
ENSG00000272989.1	1.3373	0.684956	13.2064	0.000278994	0.000865438	RP13-616I3.1
ENSG00000111863.12	1.33687	4.82527	20.6194	5.60244e-06	2.49541e-05	ADTRP
ENSG00000218336.7	1.33683	2.87706	11.679	0.000632103	0.00180299	TENM3
ENSG00000242372.6	1.33456	6.73066	55.5499	9.11175e-14	1.67806e-12	EIF6
ENSG00000172115.8	1.33282	6.08673	56.0297	7.13853e-14	1.32862e-12	CYCS
ENSG00000162894.11	1.33166	0.302856	11.3087	0.000771447	0.00215674	FCMR
ENSG00000147383.10	1.33096	4.88688	70.2688	5.17491e-17	1.54942e-15	NSDHL
ENSG00000168275.14	1.32958	2.62407	41.0778	1.46292e-10	1.54989e-09	COA6
ENSG00000165389.6	1.32861	6.43796	55.5629	9.05154e-14	1.66856e-12	SPTSSA
ENSG00000205250.8	1.32812	5.93106	121.675	2.7196e-28	3.7191e-26	E2F4
ENSG00000248282.1	1.32788	0.256855	7.80333	0.00521502	0.0118399	RP11-112L18.1
ENSG00000188486.3	1.32769	5.98155	82.5175	1.04736e-19	4.52808e-18	H2AFX
ENSG00000237649.7	1.32657	4.45016	64.6714	8.84905e-16	2.14896e-14	KIFC1
ENSG00000176340.3	1.32613	5.93943	54.3015	1.71967e-13	3.03096e-12	COX8A
ENSG00000070501.11	1.32536	4.90751	51.5867	6.85042e-13	1.07828e-11	POLB
ENSG00000163637.11	1.32468	6.01083	41.4146	1.23134e-10	1.32345e-09	PRICKLE2
ENSG00000135617.3	1.32468	3.91325	59.4033	1.28451e-14	2.67762e-13	PRADC1
ENSG00000165655.15	1.32412	4.61545	41.2655	1.32897e-10	1.42046e-09	ZNF503
ENSG00000200169.1	1.32356	1.27869	5.38433	0.0203184	0.0391254	RNU5D-1
ENSG00000182117.5	1.32331	4.86726	53.317	2.83833e-13	4.81342e-12	NOP10
ENSG00000149489.8	1.32325	0.773994	25.0965	5.45321e-07	2.96947e-06	ROM1
ENSG00000133065.10	1.32317	5.18761	73.7136	9.03133e-18	2.97368e-16	SLC41A1
ENSG00000257167.2	1.32265	1.61602	31.1682	2.36615e-08	1.65245e-07	TMPO-AS1
ENSG00000140254.12	1.32122	6.72043	41.7899	1.01629e-10	1.11089e-09	DUOXA1
ENSG00000276170.4	1.31999	2.08668	18.3396	1.84829e-05	7.40778e-05	AC124789.1
ENSG00000241468.7	1.31975	5.45168	85.9058	1.88715e-20	9.1889e-19	ATP5J2
ENSG00000159479.16	1.31904	5.16552	44.1159	3.09496e-11	3.71623e-10	MED8
ENSG00000173153.13	1.31846	5.46497	81.864	1.45778e-19	6.15074e-18	ESRRA
ENSG00000109158.10	1.31793	2.29067	16.1466	5.86226e-05	0.000210928	GABRA4
ENSG00000276903.1	1.31793	4.81073	42.9139	5.72019e-11	6.54192e-10	HIST1H2AL
ENSG00000137767.13	1.31775	4.74548	65.7542	5.10813e-16	1.26763e-14	SQRDL
ENSG00000130766.4	1.3175	3.52653	33.0577	8.9463e-09	6.78343e-08	SESN2
ENSG00000253669.3	1.31749	0.644592	24.5388	7.2829e-07	3.87283e-06	KB-1732A1.1
ENSG00000155393.12	1.3158	4.81275	50.9232	9.60511e-13	1.47339e-11	HEATR3
ENSG00000177051.5	1.31557	5.46166	41.1272	1.42639e-10	1.51451e-09	FBXO46
ENSG00000179403.11	1.31393	5.08362	56.3314	6.12313e-14	1.15299e-12	VWA1
ENSG00000071054.15	1.31291	7.34845	81.6616	1.61499e-19	6.74031e-18	MAP4K4
ENSG00000182325.10	1.31276	3.93738	68.5106	1.26197e-16	3.49617e-15	FBXL6
ENSG00000254093.8	1.31106	3.56457	56.4538	5.75332e-14	1.0935e-12	PINX1
ENSG00000137804.12	1.3106	5.33579	36.1524	1.82478e-09	1.58279e-08	NUSAP1
ENSG00000071246.10	1.30945	3.18729	11.0674	0.000878599	0.00242397	VASH1
ENSG00000125445.10	1.30771	4.78791	79.4778	4.87673e-19	1.87691e-17	MRPS7
ENSG00000125967.16	1.30696	3.29566	45.567	1.47509e-11	1.86143e-10	NECAB3
ENSG00000135374.9	1.30677	0.820209	7.34103	0.00673983	0.0149034	ELF5
ENSG00000235636.1	1.30615	1.84158	39.9676	2.58216e-10	2.62325e-09	NUS1P1
ENSG00000229512.1	1.30602	0.194174	11.477	0.000704629	0.00198635	AC068580.5
ENSG00000277363.4	1.30594	4.88643	15.5776	7.91882e-05	0.000276014	SRCIN1
ENSG00000154227.13	1.30587	7.6455	53.402	2.71827e-13	4.6426e-12	CERS3
ENSG00000146477.5	1.30531	4.849	47.8005	4.71882e-12	6.43937e-11	SLC22A3
ENSG00000112242.14	1.304	3.89963	36.254	1.73208e-09	1.50849e-08	E2F3
ENSG00000160193.11	1.30372	4.27669	43.4038	4.45325e-11	5.19465e-10	WDR4
ENSG00000259479.6	1.30214	1.29701	5.37363	0.0204434	0.0393385	SORD2P
ENSG00000118160.13	1.30183	0.362739	8.35621	0.00384371	0.00904718	SLC8A2
ENSG00000197147.12	1.30093	6.81861	54.0736	1.93122e-13	3.38525e-12	LRRC8B
ENSG00000164109.13	1.30047	3.82326	43.5628	4.10569e-11	4.83874e-10	MAD2L1
ENSG00000170638.9	1.29977	5.35137	94.0318	3.10497e-22	1.96941e-20	TRABD
ENSG00000177494.5	1.29822	2.28829	12.2732	0.000459503	0.00135559	ZBED2
ENSG00000175793.11	1.29805	10.9316	39.941	2.61745e-10	2.6563e-09	SFN
ENSG00000150753.11	1.29784	7.06792	53.4019	2.71834e-13	4.6426e-12	CCT5
ENSG00000189334.8	1.29759	8.66978	41.614	1.11192e-10	1.20517e-09	S100A14
ENSG00000155761.13	1.29639	0.997878	8.81174	0.00299298	0.00726103	SPAG17
ENSG00000146221.9	1.29623	0.729136	8.7978	0.00301593	0.00730844	TCTE1
ENSG00000141179.13	1.29608	2.45767	40.0374	2.49149e-10	2.53916e-09	PCTP
ENSG00000176194.17	1.29568	2.20272	10.2962	0.00133303	0.00352199	CIDEA
ENSG00000104691.14	1.29527	2.51669	37.6988	8.25552e-10	7.63101e-09	UBXN8
ENSG00000146409.10	1.29516	4.64082	113.657	1.54891e-26	1.72636e-24	SLC18B1
ENSG00000165929.12	1.2951	6.98023	114.114	1.22998e-26	1.39509e-24	TC2N
ENSG00000274641.1	1.29489	5.21275	44.2337	2.91428e-11	3.51646e-10	HIST1H2BO
ENSG00000101294.16	1.29479	6.44148	68.8133	1.08241e-16	3.06477e-15	HM13
ENSG00000112294.12	1.2945	5.54567	41.8308	9.95218e-11	1.09095e-09	ALDH5A1
ENSG00000184164.14	1.29428	4.34493	73.4405	1.03714e-17	3.3667e-16	CRELD2
ENSG00000278588.1	1.29365	5.02644	44.8232	2.1565e-11	2.66037e-10	HIST1H2BI
ENSG00000183048.11	1.29337	3.52204	59.6266	1.14675e-14	2.39304e-13	SLC25A10
ENSG00000106992.17	1.29199	1.97379	26.0749	3.28418e-07	1.87575e-06	AK1
ENSG00000188483.7	1.29197	4.28701	46.6205	8.61564e-12	1.124e-10	IER5L
ENSG00000126453.9	1.28965	3.02594	62.6625	2.45337e-15	5.61161e-14	BCL2L12
ENSG00000133313.14	1.28832	6.4288	58.7396	1.79982e-14	3.68294e-13	CNDP2
ENSG00000059378.12	1.2871	5.22088	50.217	1.37647e-12	2.04634e-11	PARP12
ENSG00000086696.10	1.28672	2.27046	9.19715	0.00242392	0.00601134	HSD17B2
ENSG00000101311.15	1.28626	7.65293	34.3867	4.51805e-09	3.62534e-08	FERMT1
ENSG00000100350.14	1.28383	5.60666	47.9854	4.29398e-12	5.9014e-11	FOXRED2
ENSG00000173540.12	1.28362	4.78739	36.8047	1.30574e-09	1.16615e-08	GMPPB
ENSG00000184584.12	1.28265	4.01151	39.801	2.81204e-10	2.82995e-09	TMEM173
ENSG00000051341.13	1.28232	3.94694	29.6899	5.06976e-08	3.34434e-07	POLQ
ENSG00000196584.2	1.28212	2.93117	34.0406	5.39746e-09	4.26008e-08	XRCC2
ENSG00000067225.17	1.28196	10.0265	68.7298	1.12923e-16	3.17402e-15	PKM
ENSG00000069956.11	1.28152	7.70819	81.1992	2.04073e-19	8.34346e-18	MAPK6
ENSG00000116096.5	1.28133	2.5711	23.3781	1.33083e-06	6.70876e-06	SPR
ENSG00000213585.10	1.28075	7.4093	71.1791	3.26229e-17	1.00485e-15	VDAC1
ENSG00000078081.7	1.28061	4.65557	16.7207	4.33048e-05	0.000161013	LAMP3
ENSG00000161267.11	1.27901	5.80298	32.8595	9.90677e-09	7.45017e-08	BDH1
ENSG00000165804.15	1.27859	6.95332	94.7687	2.13982e-22	1.38922e-20	ZNF219
ENSG00000256351.1	1.27775	1.59367	5.83726	0.0156903	0.0313123	RP1-7G5.5
ENSG00000140650.11	1.27744	5.04647	66.9024	2.85281e-16	7.41347e-15	PMM2
ENSG00000125977.6	1.277	5.96061	70.1209	5.57792e-17	1.65722e-15	EIF2S2
ENSG00000147155.10	1.27584	5.53635	83.9549	5.06199e-20	2.31842e-18	EBP
ENSG00000163808.16	1.27538	3.58853	35.7977	2.18901e-09	1.87178e-08	KIF15
ENSG00000213523.9	1.27371	4.40476	95.6589	1.36484e-22	9.1378e-21	SRA1
ENSG00000164062.12	1.27326	6.38303	69.5662	7.38941e-17	2.15883e-15	APEH
ENSG00000266402.3	1.27283	0.36969	28.1471	1.12437e-07	6.97332e-07	SNHG25
ENSG00000154845.15	1.27257	7.44998	81.8532	1.4658e-19	6.17107e-18	PPP4R1
ENSG00000265778.2	1.27076	0.336093	22.8646	1.7382e-06	8.59604e-06	RP11-17M16.2
ENSG00000168961.16	1.2694	1.62572	16.3563	5.2481e-05	0.000190824	LGALS9
ENSG00000048162.19	1.26908	4.05741	56.4493	5.76658e-14	1.0944e-12	NOP16
ENSG00000138160.5	1.26896	5.49564	44.7354	2.25544e-11	2.7721e-10	KIF11
ENSG00000269985.1	1.26857	0.855413	12.3413	0.00044305	0.00131106	RP1-232P20.1
ENSG00000139734.17	1.26789	3.86559	34.6237	4.0001e-09	3.24621e-08	DIAPH3
ENSG00000099256.18	1.26736	0.247641	9.8595	0.00168957	0.00436532	PRTFDC1
ENSG00000160752.14	1.26693	6.1932	51.6661	6.57896e-13	1.0398e-11	FDPS
ENSG00000108010.11	1.26631	5.99044	68.7637	1.10998e-16	3.12448e-15	GLRX3
ENSG00000259153.1	1.26624	1.29345	12.9253	0.000324175	0.000990453	RP6-65G23.3
ENSG00000085999.11	1.26597	2.51542	41.7601	1.03189e-10	1.12539e-09	RAD54L
ENSG00000171202.6	1.26566	2.57144	39.4469	3.37098e-10	3.34703e-09	TMEM126A
ENSG00000134222.16	1.26514	2.41176	34.4818	4.30246e-09	3.46823e-08	PSRC1
ENSG00000129455.15	1.26466	5.21737	29.6668	5.13068e-08	3.38106e-07	KLK8
ENSG00000119013.8	1.26451	4.47791	44.0826	3.14805e-11	3.77492e-10	NDUFB3
ENSG00000222724.1	1.26442	0.0510536	5.39361	0.0202106	0.0389585	RNU2-63P
ENSG00000111775.2	1.26373	5.45262	98.2459	3.69518e-23	2.71948e-21	COX6A1
ENSG00000172428.10	1.26363	3.53273	49.2762	2.2234e-12	3.20415e-11	MYEOV2
ENSG00000144381.16	1.26337	6.96267	62.18	3.13449e-15	7.08549e-14	HSPD1
ENSG00000168884.14	1.26316	4.5946	81.8007	1.50523e-19	6.30952e-18	TNIP2
ENSG00000169689.14	1.26259	4.47122	66.6147	3.30115e-16	8.48704e-15	STRA13
ENSG00000159199.13	1.26251	5.08671	77.5625	1.28591e-18	4.66946e-17	ATP5G1
ENSG00000131828.13	1.26184	5.73815	96.1861	1.04575e-22	7.15042e-21	PDHA1
ENSG00000232224.5	1.26174	2.38548	12.5961	0.000386556	0.0011611	LINC00202-1
ENSG00000137261.13	1.26172	1.22837	9.75805	0.0017854	0.00459136	KIAA0319
ENSG00000166598.12	1.26142	7.78594	45.647	1.41605e-11	1.79118e-10	HSP90B1
ENSG00000112473.16	1.26123	5.76182	53.6688	2.37302e-13	4.08907e-12	SLC39A7
ENSG00000272030.1	1.26099	0.460569	16.5733	4.68044e-05	0.000172361	RP1-178F15.4
ENSG00000120437.8	1.25936	5.12664	36.3407	1.65668e-09	1.45069e-08	ACAT2
ENSG00000142669.13	1.25904	6.91328	34.9767	3.33671e-09	2.75421e-08	SH3BGRL3
ENSG00000164919.10	1.2582	5.05842	67.3753	2.24446e-16	5.96112e-15	COX6C
ENSG00000135045.6	1.25729	2.26776	27.2218	1.81397e-07	1.08154e-06	C9orf40
ENSG00000162069.14	1.25683	5.92941	14.5861	0.000133899	0.000443998	CCDC64B
ENSG00000141497.13	1.25642	1.88351	18.8749	1.39574e-05	5.73709e-05	ZMYND15
ENSG00000148291.9	1.25624	3.36097	57.2068	3.92309e-14	7.60251e-13	SURF2
ENSG00000054967.12	1.256	3.30024	14.1709	0.000166933	0.000542616	RELT
ENSG00000171729.13	1.25563	4.41158	44.7166	2.2772e-11	2.79675e-10	TMEM51
ENSG00000143106.12	1.25499	5.31271	55.5117	9.29062e-14	1.70937e-12	PSMA5
ENSG00000163882.9	1.25483	4.35106	76.2614	2.485e-18	8.66469e-17	POLR2H
ENSG00000159166.13	1.25415	9.35861	50.2295	1.36779e-12	2.03658e-11	LAD1
ENSG00000141543.9	1.2537	6.54136	50.1529	1.42221e-12	2.10784e-11	EIF4A3
ENSG00000161980.5	1.25332	2.28312	46.8463	7.67794e-12	1.01194e-10	POLR3K
ENSG00000241837.6	1.2519	5.1292	70.6099	4.35321e-17	1.31154e-15	ATP5O
ENSG00000131473.16	1.25101	7.19193	60.5403	7.20885e-15	1.54446e-13	ACLY
ENSG00000110955.8	1.25037	8.91968	77.3185	1.45496e-18	5.25366e-17	ATP5B
ENSG00000117461.14	1.25029	1.83937	16.7066	4.36283e-05	0.000161941	PIK3R3
ENSG00000175792.11	1.24896	5.04443	65.1075	7.09203e-16	1.7398e-14	RUVBL1
ENSG00000171163.15	1.24879	4.07928	20.6342	5.55949e-06	2.47914e-05	ZNF692
ENSG00000162931.11	1.24838	0.930902	6.6913	0.00968847	0.0204682	TRIM17
ENSG00000116991.10	1.24829	6.52969	30.1881	3.92099e-08	2.63798e-07	SIPA1L2
ENSG00000144395.17	1.24775	1.72326	21.0679	4.43292e-06	2.01641e-05	CCDC150
ENSG00000035141.7	1.2471	5.17424	91.6322	1.0438e-21	6.09898e-20	FAM136A
ENSG00000179750.15	1.24649	1.24872	12.2366	0.000468614	0.00137909	APOBEC3B
ENSG00000100612.13	1.24616	4.73416	21.6936	3.19864e-06	1.49808e-05	DHRS7
ENSG00000117118.9	1.2459	5.66887	78.311	8.80307e-19	3.26425e-17	SDHB
ENSG00000226976.3	1.24565	0.0428204	17.6293	2.68416e-05	0.000104032	COX6A1P2
ENSG00000006695.10	1.24519	4.54202	88.7938	4.3819e-21	2.36671e-19	COX10
ENSG00000106526.10	1.24493	2.98769	16.2787	5.46762e-05	0.000197687	ACTR3C
ENSG00000126391.13	1.24379	6.68197	51.2243	8.23913e-13	1.27809e-11	FRMD8
ENSG00000088002.11	1.24311	6.8116	16.8382	4.0706e-05	0.000152294	SULT2B1
ENSG00000062716.10	1.24257	6.83243	32.3066	1.31667e-08	9.66425e-08	VMP1
ENSG00000170209.4	1.24255	2.90985	21.4297	3.67041e-06	1.69678e-05	ANKK1
ENSG00000183765.20	1.24243	3.16085	34.9604	3.36475e-09	2.77499e-08	CHEK2
ENSG00000071575.11	1.24237	5.30163	34.6215	4.00463e-09	3.24852e-08	TRIB2
ENSG00000132341.11	1.24233	7.78027	64.0259	1.22792e-15	2.91946e-14	RAN
ENSG00000117523.15	1.24193	8.97189	52.1923	5.03228e-13	8.13349e-12	PRRC2C
ENSG00000037897.16	1.24175	3.38981	41.7383	1.04346e-10	1.13609e-09	METTL1
ENSG00000175756.13	1.24119	5.35774	56.3008	6.21914e-14	1.16879e-12	AURKAIP1
ENSG00000106853.16	1.24079	5.37043	96.5753	8.5912e-23	5.91627e-21	PTGR1
ENSG00000188707.5	1.24065	3.22819	23.0935	1.54309e-06	7.70027e-06	ZBED6CL
ENSG00000198885.9	1.24021	0.208365	11.6572	0.000639539	0.00182105	ITPRIPL1
ENSG00000165283.15	1.24	5.89125	66.8512	2.928e-16	7.5782e-15	STOML2
ENSG00000110104.11	1.23993	5.33399	88.78	4.41261e-21	2.37665e-19	CCDC86
ENSG00000249042.5	1.23979	2.18416	19.6853	9.13029e-06	3.89405e-05	CTD-2015H6.3
ENSG00000107020.9	1.23934	4.22265	41.2132	1.36498e-10	1.45492e-09	PLGRKT
ENSG00000095380.10	1.23921	4.2112	55.2982	1.03562e-13	1.896e-12	NANS
ENSG00000126267.8	1.2377	6.3525	61.6849	4.03058e-15	8.91257e-14	COX6B1
ENSG00000168653.10	1.23724	4.43206	56.6647	5.16823e-14	9.8961e-13	NDUFS5
ENSG00000119812.18	1.2364	5.71596	68.5339	1.24716e-16	3.46509e-15	FAM98A
ENSG00000242114.5	1.23584	0.111682	18.7962	1.45453e-05	5.95588e-05	MTFP1
ENSG00000013275.7	1.2355	6.04319	64.4737	9.78284e-16	2.36976e-14	PSMC4
ENSG00000221926.11	1.23516	4.63717	46.0473	1.15431e-11	1.47988e-10	TRIM16
ENSG00000092929.11	1.23407	3.68676	16.4218	5.06983e-05	0.000184769	UNC13D
ENSG00000106803.9	1.23313	5.3265	45.3076	1.68393e-11	2.10841e-10	SEC61B
ENSG00000177156.10	1.23258	6.57133	49.3524	2.13874e-12	3.0914e-11	TALDO1
ENSG00000160691.18	1.23247	6.74412	42.9587	5.5908e-11	6.41295e-10	SHC1
ENSG00000163754.17	1.23238	4.56982	50.4542	1.21978e-12	1.83893e-11	GYG1
ENSG00000184967.6	1.23172	4.44985	51.1859	8.40217e-13	1.30025e-11	NOC4L
ENSG00000167645.16	1.23141	4.05077	56.3425	6.0884e-14	1.14757e-12	YIF1B
ENSG00000102144.13	1.23136	8.09041	69.4135	7.98418e-17	2.31854e-15	PGK1
ENSG00000124275.14	1.23046	5.75594	64.1903	1.12966e-15	2.69913e-14	MTRR
ENSG00000164885.12	1.23006	2.84948	51.9052	5.82471e-13	9.27433e-12	CDK5
ENSG00000166986.12	1.22976	6.27032	70.1549	5.48249e-17	1.6339e-15	MARS
ENSG00000198873.11	1.22846	2.6597	36.4583	1.5597e-09	1.36887e-08	GRK5
ENSG00000132361.16	1.22813	8.02173	63.08	1.98483e-15	4.60548e-14	CLUH
ENSG00000183605.16	1.22809	3.85762	51.915	5.79552e-13	9.23548e-12	SFXN4
ENSG00000147536.11	1.22802	3.23875	58.4559	2.07903e-14	4.19769e-13	GINS4
ENSG00000089723.9	1.22766	3.76037	19.45	1.03267e-05	4.35708e-05	OTUB2
ENSG00000181061.13	1.22752	5.74767	28.8376	7.87079e-08	5.02865e-07	HIGD1A
ENSG00000065911.11	1.22721	4.48968	33.6674	6.53878e-09	5.09006e-08	MTHFD2
ENSG00000145494.11	1.22673	4.07115	63.6496	1.48642e-15	3.48676e-14	NDUFS6
ENSG00000168453.14	1.22646	9.15301	49.5239	1.95973e-12	2.84331e-11	HR
ENSG00000111321.10	1.2256	6.76763	69.3729	8.15016e-17	2.35963e-15	LTBR
ENSG00000100116.16	1.22527	3.06427	32.5515	1.16075e-08	8.61496e-08	GCAT
ENSG00000138182.14	1.22444	5.22082	32.349	1.28821e-08	9.48788e-08	KIF20B
ENSG00000103415.11	1.22428	5.10719	41.4585	1.204e-10	1.29479e-09	HMOX2
ENSG00000119632.3	1.22394	3.27992	20.0706	7.4635e-06	3.24198e-05	IFI27L2
ENSG00000143321.18	1.22391	8.80366	50.4951	1.19462e-12	1.80948e-11	HDGF
ENSG00000013306.15	1.223	6.64024	90.4554	1.89195e-21	1.06357e-19	SLC25A39
ENSG00000085741.12	1.22291	1.46036	6.77616	0.00923834	0.0196387	WNT11
ENSG00000143627.17	1.22273	1.18479	11.6608	0.000638313	0.00181855	PKLR
ENSG00000172172.7	1.22252	4.36646	43.2164	4.90081e-11	5.66871e-10	MRPL13
ENSG00000103042.8	1.2215	4.42379	97.6648	4.95548e-23	3.52589e-21	SLC38A7
ENSG00000196313.11	1.21983	6.64447	86.95	1.11301e-20	5.61809e-19	POM121
ENSG00000135334.8	1.21937	5.18955	40.0089	2.52814e-10	2.57244e-09	AKIRIN2
ENSG00000124608.4	1.21898	5.15259	39.8369	2.76083e-10	2.78277e-09	AARS2
ENSG00000161921.14	1.21809	5.50365	38.0245	6.9861e-10	6.54866e-09	CXCL16
ENSG00000151632.16	1.21791	4.33258	26.9617	2.07526e-07	1.22821e-06	AKR1C2
ENSG00000267598.1	1.21784	1.47007	13.5337	0.000234317	0.000738615	CTC-250I14.6
ENSG00000167216.16	1.21763	2.2332	16.521	4.81152e-05	0.000176548	KATNAL2
ENSG00000136122.15	1.21748	3.10303	41.0655	1.47209e-10	1.5579e-09	BORA
ENSG00000145912.8	1.21673	5.42742	57.8544	2.82254e-14	5.57054e-13	NHP2
ENSG00000114767.6	1.21657	4.36745	58.2562	2.30108e-14	4.617e-13	RRP9
ENSG00000065978.17	1.21654	8.22962	49.7358	1.75908e-12	2.56764e-11	YBX1
ENSG00000165629.19	1.21564	6.87071	59.9496	9.73169e-15	2.05302e-13	ATP5C1
ENSG00000111229.15	1.21521	6.05022	48.7039	2.97669e-12	4.21104e-11	ARPC3
ENSG00000102030.15	1.21454	4.09152	67.7328	1.87223e-16	5.0774e-15	NAA10
ENSG00000041357.15	1.21379	6.18792	87.7214	7.53552e-21	3.89185e-19	PSMA4
ENSG00000167085.11	1.21373	6.41817	61.2006	5.15452e-15	1.12487e-13	PHB
ENSG00000099624.7	1.21228	6.59236	50.2967	1.32168e-12	1.97709e-11	ATP5D
ENSG00000125356.6	1.21076	3.8617	48.069	4.11482e-12	5.67539e-11	NDUFA1
ENSG00000117984.12	1.21002	8.59948	52.2647	4.85019e-13	7.87881e-12	CTSD
ENSG00000136950.13	1.20953	5.7259	57.0457	4.25794e-14	8.21732e-13	ARPC5L
ENSG00000179091.4	1.2092	6.39688	92.7645	5.89013e-22	3.57149e-20	CYC1
ENSG00000164466.12	1.2088	5.55904	100.679	1.08152e-23	8.47716e-22	SFXN1
ENSG00000110218.8	1.20805	5.38437	54.5272	1.53313e-13	2.73215e-12	PANX1
ENSG00000185262.8	1.20783	5.94357	57.5135	3.35671e-14	6.5444e-13	UBALD2
ENSG00000163468.14	1.2078	7.43756	69.1809	8.98328e-17	2.57722e-15	CCT3
ENSG00000126602.10	1.20733	6.84216	102.397	4.54399e-24	3.76039e-22	TRAP1
ENSG00000198900.5	1.20651	6.41642	67.1212	2.55324e-16	6.68907e-15	TOP1
ENSG00000138399.17	1.20634	4.27762	51.8093	6.11601e-13	9.71408e-12	FASTKD1
ENSG00000172009.14	1.20592	4.91336	73.0032	1.2944e-17	4.14594e-16	THOP1
ENSG00000164855.15	1.20529	6.37354	23.0822	1.55222e-06	7.73982e-06	TMEM184A
ENSG00000213866.3	1.20465	0.532024	20.6285	5.57593e-06	2.4859e-05	YBX1P10
ENSG00000156709.13	1.2043	4.31993	53.3846	2.74235e-13	4.67948e-12	AIFM1
ENSG00000130649.9	1.20409	3.60353	16.5508	4.73641e-05	0.000174156	CYP2E1
ENSG00000133985.2	1.20248	4.86143	31.5063	1.98798e-08	1.40824e-07	TTC9
ENSG00000143870.12	1.20209	7.16051	41.5754	1.13411e-10	1.22784e-09	PDIA6
ENSG00000133275.15	1.20096	6.62655	103.008	3.33827e-24	2.79863e-22	CSNK1G2
ENSG00000170906.15	1.2006	4.42614	55.033	1.18522e-13	2.14787e-12	NDUFA3
ENSG00000126522.16	1.19971	3.1876	33.2341	8.17063e-09	6.22465e-08	ASL
ENSG00000119686.9	1.19964	3.43749	11.6994	0.000625211	0.00178624	FLVCR2
ENSG00000169718.17	1.19957	6.12622	95.2013	1.71976e-22	1.13563e-20	DUS1L
ENSG00000134333.13	1.19956	9.6213	48.4416	3.40265e-12	4.75434e-11	LDHA
ENSG00000128228.4	1.199	2.58576	28.9197	7.54422e-08	4.83763e-07	SDF2L1
ENSG00000126249.7	1.19898	2.0723	32.1184	1.45057e-08	1.05348e-07	PDCD2L
ENSG00000260101.1	1.19879	2.23481	25.066	5.54008e-07	3.01252e-06	RP11-568N6.1
ENSG00000165914.14	1.19763	3.68312	42.8201	6.00129e-11	6.83502e-10	TTC7B
ENSG00000111247.14	1.19693	2.7979	28.0645	1.1734e-07	7.23551e-07	RAD51AP1
ENSG00000111328.6	1.19667	5.03779	36.5044	1.52326e-09	1.34116e-08	CDK2AP1
ENSG00000011426.10	1.19632	6.2531	32.1267	1.44439e-08	1.0503e-07	ANLN
ENSG00000091651.8	1.19603	2.64445	34.1561	5.08631e-09	4.03764e-08	ORC6
ENSG00000197905.8	1.1959	3.72374	43.0948	5.21504e-11	5.99979e-10	TEAD4
ENSG00000174442.11	1.19568	4.1782	45.4229	1.58763e-11	1.99562e-10	ZWILCH
ENSG00000130762.14	1.195	3.7203	31.1746	2.35834e-08	1.64759e-07	ARHGEF16
ENSG00000172757.12	1.19497	8.76593	48.9947	2.5665e-12	3.67389e-11	CFL1
ENSG00000111405.8	1.1935	5.92321	15.132	0.000100251	0.000342615	ENDOU
ENSG00000105401.6	1.19341	6.73208	73.2202	1.15965e-17	3.73294e-16	CDC37
ENSG00000160957.12	1.19317	3.89211	46.9167	7.4067e-12	9.78863e-11	RECQL4
ENSG00000273542.1	1.19271	1.37022	19.4259	1.04581e-05	4.40772e-05	HIST1H4K
ENSG00000257497.2	1.19199	1.89064	13.5933	0.000226997	0.000717181	RP11-585P4.5
ENSG00000166902.4	1.19146	4.43085	57.9392	2.70349e-14	5.35753e-13	MRPL16
ENSG00000163694.14	1.19125	6.15567	59.9119	9.91993e-15	2.08817e-13	RBM47
ENSG00000176890.15	1.19055	4.32201	50.1533	1.42195e-12	2.10784e-11	TYMS
ENSG00000128016.5	1.19039	7.69638	11.53	0.000684825	0.00193704	ZFP36
ENSG00000166689.14	1.18953	5.54739	26.4549	2.69769e-07	1.56536e-06	PLEKHA7
ENSG00000161036.10	1.18921	3.51884	51.0175	9.15457e-13	1.40877e-11	LRWD1
ENSG00000110717.10	1.18787	5.49504	78.3622	8.57795e-19	3.19305e-17	NDUFS8
ENSG00000033011.11	1.18706	4.28963	68.9791	9.95132e-17	2.83429e-15	ALG1
ENSG00000100263.13	1.18686	3.51497	63.721	1.4335e-15	3.37083e-14	RHBDD3
ENSG00000198331.10	1.18647	2.53267	22.1729	2.4916e-06	1.19391e-05	HYLS1
ENSG00000159131.16	1.18564	6.21578	67.1417	2.52674e-16	6.62866e-15	GART
ENSG00000129932.7	1.18309	3.99627	53.2904	2.87715e-13	4.86642e-12	DOHH
ENSG00000106868.16	1.18238	2.16066	22.7053	1.88844e-06	9.26067e-06	SUSD1
ENSG00000138092.10	1.18223	3.95362	56.426	5.83538e-14	1.10528e-12	CENPO
ENSG00000165280.15	1.18204	8.52426	70.76	4.03426e-17	1.22502e-15	VCP
ENSG00000124570.17	1.1813	4.81292	42.3512	7.62711e-11	8.54538e-10	SERPINB6
ENSG00000156697.12	1.18063	4.20457	58.5522	1.97972e-14	4.02243e-13	UTP14A
ENSG00000120549.15	1.18059	7.73756	62.2578	3.01312e-15	6.82714e-14	KIAA1217
ENSG00000108518.7	1.18041	8.65628	46.7446	8.08665e-12	1.06e-10	PFN1
ENSG00000072506.12	1.18036	5.67593	43.3338	4.61551e-11	5.36122e-10	HSD17B10
ENSG00000149418.10	1.18028	7.73289	58.1008	2.49022e-14	4.9758e-13	ST14
ENSG00000213593.9	1.17931	5.52702	76.0472	2.76966e-18	9.60513e-17	TMX2
ENSG00000114346.13	1.17925	5.06518	48.6282	3.09393e-12	4.36091e-11	ECT2
ENSG00000127948.13	1.17903	6.34095	53.0073	3.32311e-13	5.55734e-12	POR
ENSG00000006327.13	1.17863	3.77626	14.3365	0.00015287	0.000501127	TNFRSF12A
ENSG00000176170.13	1.17835	2.54988	31.7995	1.70935e-08	1.22663e-07	SPHK1
ENSG00000185000.9	1.1783	4.8696	62.8739	2.20378e-15	5.07686e-14	DGAT1
ENSG00000129116.17	1.17774	7.67522	31.2423	2.27748e-08	1.59689e-07	PALLD
ENSG00000103254.9	1.17729	1.91342	20.7841	5.1407e-06	2.31487e-05	FAM173A
ENSG00000068079.7	1.17716	2.67242	22.5075	2.09326e-06	1.01796e-05	IFI35
ENSG00000147912.12	1.17711	1.82856	28.0477	1.18359e-07	7.29602e-07	FBXO10
ENSG00000170482.16	1.17685	0.825606	11.4126	0.000729484	0.00204863	SLC23A1
ENSG00000172590.18	1.17549	4.33061	48.3557	3.55511e-12	4.96018e-11	MRPL52
ENSG00000178814.15	1.17391	4.98745	43.7813	3.67195e-11	4.35951e-10	OPLAH
ENSG00000130520.10	1.17198	5.32084	59.2035	1.42177e-14	2.94464e-13	LSM4
ENSG00000146701.11	1.17138	7.69958	57.044	4.26165e-14	8.21732e-13	MDH2
ENSG00000148834.12	1.17058	4.43195	34.5971	4.05506e-09	3.28804e-08	GSTO1
ENSG00000135899.16	1.17044	3.06399	33.2831	7.96707e-09	6.08642e-08	SP110
ENSG00000145632.14	1.17034	7.89778	44.2049	2.95739e-11	3.56402e-10	PLK2
ENSG00000261236.5	1.17015	5.45292	68.2271	1.45713e-16	3.99663e-15	BOP1
ENSG00000176595.3	1.16996	1.16373	8.65948	0.00325364	0.00780598	KBTBD11
ENSG00000188827.10	1.16788	4.01049	38.428	5.68104e-10	5.4068e-09	SLX4
ENSG00000168496.3	1.16754	4.23707	52.1966	5.02129e-13	8.12253e-12	FEN1
ENSG00000115286.19	1.1671	5.23489	85.4166	2.41678e-20	1.1621e-18	NDUFS7
ENSG00000169976.6	1.16687	5.26495	47.4064	5.76941e-12	7.79578e-11	SF3B5
ENSG00000163082.9	1.16651	7.04617	34.9607	3.36435e-09	2.77499e-08	SGPP2
ENSG00000136522.13	1.16473	4.5588	57.2593	3.81971e-14	7.40963e-13	MRPL47
ENSG00000130332.14	1.16329	4.21799	70.0004	5.92917e-17	1.75079e-15	LSM7
ENSG00000241170.2	1.16254	0.22022	8.30557	0.00395237	0.00927124	RP11-147I3.1
ENSG00000137547.8	1.16243	4.92144	61.6989	4.00199e-15	8.86969e-14	MRPL15
ENSG00000129255.14	1.16174	5.02014	51.8919	5.86426e-13	9.32959e-12	MPDU1
ENSG00000204394.12	1.16169	7.12228	76.0353	2.78635e-18	9.64568e-17	VARS
ENSG00000167962.12	1.16072	6.36741	67.0429	2.65669e-16	6.94124e-15	ZNF598
ENSG00000140464.19	1.15856	6.54718	46.3584	9.84838e-12	1.27533e-10	PML
ENSG00000162746.14	1.15791	0.196022	22.4109	2.20121e-06	1.06562e-05	FCRLB
ENSG00000186010.18	1.15715	4.92419	68.4831	1.27968e-16	3.54015e-15	NDUFA13
ENSG00000172548.14	1.15626	7.09739	53.0608	3.2338e-13	5.43155e-12	NIPAL4
ENSG00000152380.9	1.15611	1.43909	30.0203	4.27548e-08	2.86051e-07	FAM151B
ENSG00000112972.14	1.15585	8.09025	26.3163	2.8983e-07	1.66921e-06	HMGCS1
ENSG00000111684.10	1.15536	5.78868	67.5052	2.10131e-16	5.60407e-15	LPCAT3
ENSG00000072042.12	1.15518	5.84093	56.1267	6.79467e-14	1.26952e-12	RDH11
ENSG00000051523.10	1.15472	3.14048	26.0157	3.38646e-07	1.92733e-06	CYBA
ENSG00000090316.15	1.15412	6.18633	88.6358	4.74632e-21	2.54218e-19	MAEA
ENSG00000162458.12	1.15386	5.01735	28.0995	1.15238e-07	7.12869e-07	FBLIM1
ENSG00000212664.5	1.15302	1.89954	15.382	8.78206e-05	0.000303523	RP11-592N21.1
ENSG00000134697.12	1.15235	5.59818	52.0657	5.3674e-13	8.61734e-12	GNL2
ENSG00000275379.1	1.15219	5.27616	35.6732	2.33358e-09	1.98921e-08	HIST1H3I
ENSG00000057657.14	1.15185	5.70117	16.7741	4.21039e-05	0.000156909	PRDM1
ENSG00000144802.11	1.15178	7.91013	45.2209	1.76018e-11	2.19391e-10	NFKBIZ
ENSG00000187134.12	1.15157	3.35628	14.7875	0.000120332	0.00040345	AKR1C1
ENSG00000272455.1	1.15153	0.972034	16.8538	4.03716e-05	0.000151184	RP4-758J18.13
ENSG00000125656.8	1.15121	5.01236	54.9409	1.24208e-13	2.24669e-12	CLPP
ENSG00000183207.12	1.15067	5.97068	66.1964	4.08167e-16	1.02745e-14	RUVBL2
ENSG00000119718.10	1.15056	4.5702	46.5994	8.70857e-12	1.13382e-10	EIF2B2
ENSG00000143621.16	1.1498	7.19952	56.6283	5.26489e-14	1.00513e-12	ILF2
ENSG00000114738.10	1.14899	6.93669	39.9057	2.66526e-10	2.70198e-09	MAPKAPK3
ENSG00000249863.2	1.14897	2.26889	17.5326	2.82426e-05	0.000108871	RP11-177C12.1
ENSG00000140950.15	1.14896	5.18835	36.9141	1.23452e-09	1.10717e-08	TLDC1
ENSG00000134375.10	1.14872	4.59067	88.377	5.40949e-21	2.86554e-19	TIMM17A
ENSG00000266472.5	1.14797	5.34436	53.8969	2.11296e-13	3.6804e-12	MRPS21
ENSG00000204315.3	1.14782	2.90848	25.1605	5.27515e-07	2.87738e-06	FKBPL
ENSG00000051180.16	1.14744	2.35647	34.9897	3.31461e-09	2.74067e-08	RAD51
ENSG00000159720.11	1.14709	6.67418	58.989	1.58559e-14	3.26988e-13	ATP6V0D1
ENSG00000236017.7	1.14648	1.3965	8.97624	0.00273513	0.00668255	ASMTL-AS1
ENSG00000104518.10	1.14605	3.56217	26.6077	2.49244e-07	1.45401e-06	GSDMD
ENSG00000146938.14	1.14562	1.94668	5.13133	0.0234977	0.0444372	NLGN4X
ENSG00000163472.18	1.1444	7.63629	42.0674	8.818e-11	9.74935e-10	TMEM79
ENSG00000197774.12	1.14431	4.54679	23.8889	1.0206e-06	5.26322e-06	EME2
ENSG00000204220.9	1.14372	4.00417	42.4485	7.25675e-11	8.15887e-10	PFDN6
ENSG00000091483.6	1.14369	5.8062	48.8982	2.69592e-12	3.83919e-11	FH
ENSG00000116459.10	1.14325	6.78346	48.2051	3.83891e-12	5.32531e-11	ATP5F1
ENSG00000100664.10	1.14283	8.01892	47.3548	5.92332e-12	7.9758e-11	EIF5
ENSG00000146904.8	1.14193	5.98801	52.1384	5.17229e-13	8.32489e-12	EPHA1
ENSG00000143319.16	1.14187	5.68974	66.3901	3.69949e-16	9.37367e-15	ISG20L2
ENSG00000166477.12	1.14182	4.5427	80.4708	2.95027e-19	1.17293e-17	LEO1
ENSG00000249353.2	1.14092	1.38509	27.0784	1.95371e-07	1.15983e-06	NPM1P27
ENSG00000149923.13	1.14083	6.41232	52.5135	4.27293e-13	7.01631e-12	PPP4C
ENSG00000118162.13	1.14074	2.67561	31.221	2.30266e-08	1.61161e-07	KPTN
ENSG00000104549.11	1.14067	7.27542	18.349	1.83915e-05	7.37418e-05	SQLE
ENSG00000163541.11	1.14036	5.99711	63.1382	1.92699e-15	4.47666e-14	SUCLG1
ENSG00000138413.13	1.1403	5.81171	42.9064	5.7422e-11	6.5632e-10	IDH1
ENSG00000118705.16	1.13998	7.31549	52.2579	4.86701e-13	7.89885e-12	RPN2
ENSG00000280071.3	1.1395	1.76733	20.3029	6.60989e-06	2.90323e-05	CH507-9B2.3
ENSG00000166126.10	1.13939	3.38	29.0398	7.0907e-08	4.5742e-07	AMN
ENSG00000104689.9	1.13896	4.41396	50.5195	1.17984e-12	1.79273e-11	TNFRSF10A
ENSG00000167112.9	1.1377	5.6683	57.7747	2.93929e-14	5.77351e-13	TRUB2
ENSG00000149761.8	1.13767	4.45929	73.2592	1.13696e-17	3.67218e-16	NUDT22
ENSG00000006625.17	1.13535	4.89592	28.2328	1.07567e-07	6.69713e-07	GGCT
ENSG00000140332.15	1.13451	8.15045	63.7317	1.42569e-15	3.35656e-14	TLE3
ENSG00000141753.6	1.13442	4.39768	14.1936	0.00016493	0.00053683	IGFBP4
ENSG00000224861.1	1.13416	0.51986	18.8907	1.38427e-05	5.69601e-05	YBX1P1
ENSG00000138073.13	1.13394	5.35677	68.4763	1.28414e-16	3.54739e-15	PREB
ENSG00000117877.10	1.13358	3.61245	38.416	5.71628e-10	5.43497e-09	CD3EAP
ENSG00000100216.5	1.13348	6.20615	52.6984	3.88909e-13	6.45791e-12	TOMM22
ENSG00000123545.5	1.13203	3.15278	22.5493	2.04818e-06	9.98055e-06	NDUFAF4
ENSG00000268670.1	1.13136	0.47893	6.35815	0.0116843	0.0241792	CTD-2622I13.3
ENSG00000059769.19	1.1312	2.90581	39.9001	2.67289e-10	2.70829e-09	DNAJC25
ENSG00000136997.14	1.1308	7.58127	21.1446	4.25909e-06	1.94468e-05	MYC
ENSG00000255198.4	1.13013	2.20395	27.7335	1.39231e-07	8.48233e-07	SNHG9
ENSG00000277775.1	1.12981	5.20602	23.6708	1.14303e-06	5.84301e-06	HIST1H3F
ENSG00000112578.9	1.1286	4.0087	58.5421	1.98989e-14	4.03884e-13	BYSL
ENSG00000196976.6	1.12791	3.05113	32.27	1.34167e-08	9.82536e-08	LAGE3
ENSG00000186648.14	1.12784	4.40599	23.9958	9.65473e-07	4.99765e-06	LRRC16B
ENSG00000228594.3	1.12768	4.67957	53.7023	2.33295e-13	4.02721e-12	C1orf233
ENSG00000087269.15	1.12739	5.96505	74.2226	6.97865e-18	2.32405e-16	NOP14
ENSG00000117410.13	1.12706	5.23514	58.3967	2.14252e-14	4.31683e-13	ATP6V0B
ENSG00000137135.17	1.12694	1.87788	26.2947	2.93089e-07	1.68546e-06	ARHGEF39
ENSG00000101811.13	1.12687	4.20559	71.0859	3.42011e-17	1.04844e-15	CSTF2
ENSG00000275714.1	1.12648	4.71566	26.7874	2.27116e-07	1.33432e-06	HIST1H3A
ENSG00000116478.11	1.12586	6.13057	69.5628	7.40187e-17	2.1592e-15	HDAC1
ENSG00000117519.15	1.12515	5.37582	19.1469	1.21032e-05	5.03519e-05	CNN3
ENSG00000132305.20	1.12495	6.32832	80.1602	3.45243e-19	1.35857e-17	IMMT
ENSG00000179115.10	1.12418	6.11628	66.7332	3.10854e-16	8.01321e-15	FARSA
ENSG00000166123.13	1.12371	6.63233	41.619	1.10912e-10	1.20281e-09	GPT2
ENSG00000048140.17	1.12317	4.98188	47.8794	4.53264e-12	6.19847e-11	TSPAN17
ENSG00000101439.8	1.12171	7.08213	34.8922	3.48475e-09	2.86171e-08	CST3
ENSG00000172818.9	1.12119	6.87846	10.8138	0.00100748	0.00274034	OVOL1
ENSG00000183856.10	1.12093	4.63239	42.7389	6.25556e-11	7.11201e-10	IQGAP3
ENSG00000185480.11	1.1205	3.08965	19.9992	7.74735e-06	3.35129e-05	PARPBP
ENSG00000196465.10	1.12032	3.81939	49.9947	1.54159e-12	2.26907e-11	MYL6B
ENSG00000100292.16	1.11928	3.94465	7.79756	0.00523168	0.0118735	HMOX1
ENSG00000117143.13	1.11924	4.33233	17.3637	3.08665e-05	0.000118019	UAP1
ENSG00000197153.4	1.11901	4.39085	22.9406	1.67082e-06	8.28619e-06	HIST1H3J
ENSG00000189051.5	1.11898	2.6963	6.87187	0.00875629	0.0187349	RNF222
ENSG00000112695.11	1.11756	5.47824	56.6422	5.22789e-14	9.9905e-13	COX7A2
ENSG00000135940.6	1.1173	6.65582	61.2893	4.92753e-15	1.07969e-13	COX5B
ENSG00000268858.2	1.11722	3.46148	25.5539	4.30196e-07	2.39257e-06	RP4-591C20.9
ENSG00000005194.14	1.11693	5.06332	76.2004	2.56296e-18	8.92038e-17	CIAPIN1
ENSG00000214160.9	1.11679	5.11434	63.507	1.59802e-15	3.73039e-14	ALG3
ENSG00000248487.8	1.11662	0.772905	14.7528	0.000122566	0.000410086	ABHD14A
ENSG00000080608.9	1.11541	5.84267	53.3358	2.81143e-13	4.77621e-12	KIAA0020
ENSG00000104907.12	1.11463	4.81613	38.216	6.33322e-10	5.95993e-09	TRMT1
ENSG00000043039.6	1.11392	5.74627	26.9965	2.03827e-07	1.20743e-06	BARX2
ENSG00000243650.3	1.11342	0.358781	7.07703	0.00780785	0.0169577	RN7SL834P
ENSG00000248593.3	1.11245	0.59848	13.3458	0.000258997	0.000808624	DSTNP2
ENSG00000101361.14	1.11188	6.07764	67.5947	2.00807e-16	5.40022e-15	NOP56
ENSG00000105676.13	1.11138	4.53165	45.2905	1.69875e-11	2.12145e-10	ARMC6
ENSG00000186567.12	1.11127	4.2368	17.7837	2.47492e-05	9.6563e-05	CEACAM19
ENSG00000077312.8	1.11123	5.38331	67.401	2.21541e-16	5.9002e-15	SNRPA
ENSG00000182378.12	1.11117	5.12969	26.492	2.64629e-07	1.53692e-06	PLCXD1
ENSG00000139880.19	1.11043	2.96523	34.2268	4.90489e-09	3.90649e-08	CDH24
ENSG00000123159.15	1.11025	7.38833	44.9831	1.98745e-11	2.46733e-10	GIPC1
ENSG00000004779.9	1.10998	4.48686	43.648	3.93084e-11	4.64997e-10	NDUFAB1
ENSG00000169228.13	1.10984	3.57144	30.1023	4.09851e-08	2.75069e-07	RAB24
ENSG00000224411.3	1.10976	0.155902	15.1418	9.97285e-05	0.000340951	HSP90AA2P
ENSG00000176720.4	1.10936	5.27671	46.5221	9.05895e-12	1.17626e-10	BOK
ENSG00000131148.8	1.10887	4.17141	63.0294	2.03645e-15	4.7139e-14	EMC8
ENSG00000139546.10	1.10832	3.71069	59.0929	1.50399e-14	3.10824e-13	TARBP2
ENSG00000174547.13	1.10821	4.45666	45.9774	1.19626e-11	1.53061e-10	MRPL11
ENSG00000135378.3	1.10726	7.09354	69.1879	8.95143e-17	2.5723e-15	PRRG4
ENSG00000117450.13	1.10712	7.60716	48.8667	2.73964e-12	3.89857e-11	PRDX1
ENSG00000187838.16	1.10616	0.590993	17.7137	2.56776e-05	9.98216e-05	TMEM256-PLSCR3
ENSG00000183648.9	1.10606	4.22044	46.1022	1.12242e-11	1.44195e-10	NDUFB1
ENSG00000126457.20	1.10513	6.2814	53.5644	2.50254e-13	4.30454e-12	PRMT1
ENSG00000147400.8	1.10488	4.34548	34.4375	4.40155e-09	3.53923e-08	CETN2
ENSG00000088682.13	1.10469	5.07442	81.6311	1.64011e-19	6.81565e-18	COQ9
ENSG00000113387.11	1.10444	7.06339	51.0117	9.18175e-13	1.41182e-11	SUB1
ENSG00000077463.14	1.1041	3.99933	52.1674	5.0965e-13	8.22348e-12	SIRT6
ENSG00000111845.4	1.10389	4.08202	33.3083	7.86463e-09	6.02008e-08	PAK1IP1
ENSG00000130590.13	1.10347	3.46441	25.419	4.61351e-07	2.54383e-06	SAMD10
ENSG00000185052.11	1.10346	5.33753	43.3513	4.57429e-11	5.3229e-10	SLC24A3
ENSG00000142661.18	1.10344	3.77435	19.2356	1.1554e-05	4.82426e-05	MYOM3
ENSG00000162078.11	1.1018	3.61673	20.8898	4.86479e-06	2.19679e-05	ZG16B
ENSG00000085117.11	1.10171	7.25872	38.6075	5.18193e-10	4.97847e-09	CD82
ENSG00000132646.10	1.1014	6.06227	39.454	3.35878e-10	3.33734e-09	PCNA
ENSG00000198176.12	1.10087	6.72779	74.9761	4.76456e-18	1.62029e-16	TFDP1
ENSG00000068120.14	1.10085	6.06992	46.8294	7.74427e-12	1.01859e-10	COASY
ENSG00000114268.11	1.10072	2.8823	24.8957	6.0516e-07	3.27221e-06	PFKFB4
ENSG00000165501.16	1.10061	3.03585	32.9428	9.49082e-09	7.16531e-08	LRR1
ENSG00000198858.9	1.09952	6.12832	50.2265	1.36985e-12	2.03808e-11	R3HDM4
ENSG00000205220.11	1.09917	2.06372	27.3615	1.68754e-07	1.01179e-06	PSMB10
ENSG00000104522.15	1.09903	6.85375	38.3596	5.88368e-10	5.56669e-09	TSTA3
ENSG00000178896.6	1.09879	3.85592	48.2443	3.76293e-12	5.23121e-11	EXOSC4
ENSG00000124562.9	1.09842	5.0041	47.2784	6.15887e-12	8.25837e-11	SNRPC
ENSG00000168439.16	1.09824	6.56825	51.5212	7.08298e-13	1.11126e-11	STIP1
ENSG00000104147.8	1.09804	1.35807	13.267	0.000270114	0.000840596	OIP5
ENSG00000136379.11	1.09775	5.03479	33.6447	6.61535e-09	5.14343e-08	ABHD17C
ENSG00000127586.16	1.09724	4.2096	36.1649	1.81304e-09	1.57402e-08	CHTF18
ENSG00000142961.14	1.09695	4.31386	32.8721	9.84237e-09	7.40463e-08	MOB3C
ENSG00000160767.20	1.09644	5.14774	72.7598	1.4643e-17	4.68237e-16	FAM189B
ENSG00000012048.19	1.09625	4.60795	39.6273	3.07364e-10	3.06919e-09	BRCA1
ENSG00000118939.17	1.09523	3.69024	31.6323	1.86303e-08	1.32753e-07	UCHL3
ENSG00000179271.2	1.09496	4.36516	33.8924	5.8246e-09	4.58408e-08	GADD45GIP1
ENSG00000115350.11	1.09475	3.0067	32.1377	1.43622e-08	1.04551e-07	POLE4
ENSG00000210082.2	1.09351	5.53429	5.00635	0.0252544	0.0473831	MT-RNR2
ENSG00000170899.10	1.0931	6.67465	37.4675	9.29476e-10	8.49391e-09	GSTA4
ENSG00000169021.5	1.09274	5.80834	43.1739	5.00849e-11	5.78286e-10	UQCRFS1
ENSG00000196756.11	1.09229	4.26914	18.8064	1.44681e-05	5.92553e-05	SNHG17
ENSG00000084623.11	1.09219	6.63195	38.8925	4.47799e-10	4.33892e-09	EIF3I
ENSG00000135046.13	1.0921	7.75673	6.08599	0.0136258	0.0276473	ANXA1
ENSG00000231609.5	1.09166	0.587574	14.1594	0.000167952	0.000545403	AC009501.4
ENSG00000116288.12	1.09034	5.26117	33.4287	7.39238e-09	5.68794e-08	PARK7
ENSG00000182199.10	1.08993	6.30089	52.8597	3.58243e-13	5.97849e-12	SHMT2
ENSG00000167136.6	1.08918	3.51915	39.3436	3.55416e-10	3.50544e-09	ENDOG
ENSG00000175854.11	1.08897	2.71967	34.1549	5.08949e-09	4.0385e-08	SWI5
ENSG00000130701.3	1.08881	3.23953	16.5608	4.71155e-05	0.000173341	RBBP8NL
ENSG00000260186.5	1.08859	0.14106	5.11013	0.0237865	0.0449141	RP11-481J2.2
ENSG00000112304.10	1.08847	3.75476	25.5328	4.34927e-07	2.4154e-06	ACOT13
ENSG00000166226.12	1.08837	6.76256	47.483	5.54844e-12	7.513e-11	CCT2
ENSG00000167283.7	1.0883	5.89891	53.0325	3.28073e-13	5.496e-12	ATP5L
ENSG00000131467.10	1.08799	7.27762	53.2506	2.93602e-13	4.95729e-12	PSME3
ENSG00000158417.10	1.0876	6.44378	23.9506	9.88383e-07	5.10802e-06	EIF5B
ENSG00000262061.5	1.08723	1.01895	11.6211	0.000652068	0.00185227	RP11-1260E13.4
ENSG00000186684.12	1.08648	3.73165	33.5036	7.11338e-09	5.50402e-08	CYP27C1
ENSG00000187741.14	1.08507	3.96444	25.8469	3.69607e-07	2.08629e-06	FANCA
ENSG00000162645.12	1.08452	6.93671	50.4075	1.24914e-12	1.87732e-11	GBP2
ENSG00000060140.8	1.08365	1.51234	19.0928	1.24514e-05	5.17362e-05	STYK1
ENSG00000172216.5	1.08354	7.58905	18.5409	1.66298e-05	6.72236e-05	CEBPB
ENSG00000165272.14	1.08298	10.6651	23.1665	1.48564e-06	7.42897e-06	AQP3
ENSG00000187801.14	1.08165	1.4032	17.9541	2.26295e-05	8.90677e-05	ZFP69B
ENSG00000167862.9	1.08116	4.12497	35.3316	2.78081e-09	2.33739e-08	ICT1
ENSG00000159231.5	1.0808	4.6975	24.7908	6.39012e-07	3.4427e-06	CBR3
ENSG00000104524.13	1.08056	3.37214	34.9954	3.30479e-09	2.73489e-08	PYCRL
ENSG00000135838.13	1.08027	4.22172	39.9415	2.61689e-10	2.6563e-09	NPL
ENSG00000132963.7	1.07934	5.06855	35.0461	3.21986e-09	2.67494e-08	POMP
ENSG00000141499.16	1.07871	3.15813	51.6836	6.5206e-13	1.03142e-11	WRAP53
ENSG00000256751.5	1.07825	2.14389	22.6551	1.93843e-06	9.48651e-06	PLBD1-AS1
ENSG00000237807.3	1.07799	1.05266	13.4777	0.000241421	0.000758404	RP11-400K9.4
ENSG00000196510.12	1.07748	5.63563	69.4392	7.88052e-17	2.29189e-15	ANAPC7
ENSG00000170775.2	1.07558	3.78111	22.2555	2.38672e-06	1.14851e-05	GPR37
ENSG00000177830.17	1.07529	5.13567	47.7649	4.80521e-12	6.55262e-11	CHID1
ENSG00000163832.15	1.07464	3.47688	63.5528	1.56126e-15	3.649e-14	ELP6
ENSG00000179933.5	1.07457	4.77255	45.3921	1.61286e-11	2.02337e-10	C14orf119
ENSG00000197345.12	1.07378	3.83212	49.3709	2.1187e-12	3.06472e-11	MRPL21
ENSG00000116455.13	1.07353	4.3516	36.3758	1.62707e-09	1.4254e-08	WDR77
ENSG00000277224.1	1.0723	4.82907	23.1875	1.4695e-06	7.35587e-06	HIST1H2BF
ENSG00000173692.12	1.07183	6.94848	53.7878	2.23354e-13	3.86947e-12	PSMD1
ENSG00000129595.12	1.07178	5.84344	48.9824	2.58263e-12	3.6915e-11	EPB41L4A
ENSG00000128272.14	1.07141	7.44738	82.8729	8.75032e-20	3.82593e-18	ATF4
ENSG00000108242.12	1.07134	3.23555	9.27047	0.00232877	0.00580522	CYP2C18
ENSG00000259205.2	1.07088	0.411995	5.61162	0.0178418	0.0349265	PRKXP1
ENSG00000232434.2	1.07086	2.32173	17.4255	2.98795e-05	0.00011454	C9orf172
ENSG00000113648.16	1.07033	7.97876	74.64	5.64883e-18	1.90089e-16	H2AFY
ENSG00000107731.12	1.06961	5.69077	17.9052	2.32191e-05	9.11463e-05	UNC5B
ENSG00000245080.5	1.06851	0.358763	5.67685	0.0171902	0.0338433	RP11-320N21.1
ENSG00000167700.8	1.06804	3.93469	33.6108	6.7318e-09	5.22765e-08	MFSD3
ENSG00000103363.14	1.06792	6.08843	52.2547	4.87485e-13	7.8989e-12	TCEB2
ENSG00000182054.9	1.06791	6.98388	28.7666	8.16455e-08	5.19396e-07	IDH2
ENSG00000146410.11	1.0678	1.72524	20.621	5.59776e-06	2.4939e-05	MTFR2
ENSG00000277161.1	1.06759	4.3285	40.4663	2.00032e-10	2.07702e-09	PIGW
ENSG00000189159.15	1.06706	5.28148	48.9842	2.58037e-12	3.691e-11	HN1
ENSG00000163938.16	1.06706	6.54926	68.6579	1.17112e-16	3.26795e-15	GNL3
ENSG00000169855.19	1.06565	7.65232	43.1785	4.99663e-11	5.77261e-10	ROBO1
ENSG00000244363.3	1.06549	0.522814	10.7273	0.00105565	0.00285525	RPL7P23
ENSG00000104825.16	1.06522	4.60416	39.4909	3.29585e-10	3.28088e-09	NFKBIB
ENSG00000229344.1	1.06448	1.55696	7.93983	0.00483584	0.0110847	RP5-857K21.7
ENSG00000124172.9	1.06439	5.47633	46.6052	8.6829e-12	1.13124e-10	ATP5E
ENSG00000106636.7	1.06366	6.51356	57.6294	3.16454e-14	6.1885e-13	YKT6
ENSG00000087088.19	1.06366	4.34781	51.1973	8.35355e-13	1.2948e-11	BAX
ENSG00000087008.15	1.06363	4.93861	40.4054	2.06371e-10	2.13823e-09	ACOX3
ENSG00000139344.7	1.06299	0.751475	11.4963	0.000697361	0.00196846	AMDHD1
ENSG00000162909.17	1.06173	6.61709	16.2491	5.5536e-05	0.000200646	CAPN2
ENSG00000124615.17	1.06057	2.83251	6.26187	0.0123364	0.0253391	MOCS1
ENSG00000053372.4	1.06046	5.5194	38.5633	5.30053e-10	5.0722e-09	MRTO4
ENSG00000030582.16	1.06002	8.59434	50.2803	1.33278e-12	1.99061e-11	GRN
ENSG00000185432.11	1.06001	5.8414	14.7075	0.000125544	0.000418959	METTL7A
ENSG00000041880.14	1.05988	3.31674	32.7433	1.05169e-08	7.8783e-08	PARP3
ENSG00000079462.7	1.05974	3.59121	29.9318	4.47511e-08	2.98785e-07	PAFAH1B3
ENSG00000120889.12	1.05965	4.11023	17.9972	2.21229e-05	8.7377e-05	TNFRSF10B
ENSG00000188636.3	1.05895	4.44794	28.2595	1.06092e-07	6.61383e-07	LDOC1L
ENSG00000197467.13	1.05839	1.08298	8.37881	0.00379621	0.00894848	COL13A1
ENSG00000160877.5	1.05832	6.592	57.6909	3.06715e-14	6.01024e-13	NACC1
ENSG00000163531.15	1.05825	5.62411	15.5339	8.10372e-05	0.000281745	NFASC
ENSG00000130758.7	1.05817	3.89653	32.3091	1.31498e-08	9.65551e-08	MAP3K10
ENSG00000123297.16	1.058	4.10007	50.622	1.11985e-12	1.70426e-11	TSFM
ENSG00000240972.1	1.05796	6.26339	39.4315	3.39779e-10	3.37191e-09	MIF
ENSG00000152234.15	1.05766	8.63227	44.2785	2.84825e-11	3.44758e-10	ATP5A1
ENSG00000103196.11	1.05763	5.24638	18.0908	2.10613e-05	8.35604e-05	CRISPLD2
ENSG00000175198.14	1.05705	5.16819	34.8814	3.50406e-09	2.87512e-08	PCCA
ENSG00000147454.13	1.05684	5.70119	40.0633	2.45859e-10	2.50961e-09	SLC25A37
ENSG00000100889.11	1.05674	4.57201	33.3142	7.84081e-09	6.00423e-08	PCK2
ENSG00000185033.14	1.05665	7.52182	30.3272	3.64966e-08	2.47095e-07	SEMA4B
ENSG00000135821.16	1.05599	8.31492	16.9685	3.80042e-05	0.000142985	GLUL
ENSG00000135476.11	1.05561	4.42995	38.9504	4.3472e-10	4.2292e-09	ESPL1
ENSG00000204588.5	1.05481	0.618159	9.39315	0.00217797	0.0054758	LINC01123
ENSG00000178726.6	1.05409	7.67264	24.9307	5.94298e-07	3.21709e-06	THBD
ENSG00000132698.13	1.05352	7.16544	26.0359	3.35131e-07	1.91014e-06	RAB25
ENSG00000161677.11	1.053	3.45774	31.3701	2.13234e-08	1.50277e-07	JOSD2
ENSG00000197019.4	1.05287	4.12998	16.8377	4.07156e-05	0.000152294	SERTAD1
ENSG00000204267.13	1.0521	5.54995	37.6111	8.63521e-10	7.94272e-09	TAP2
ENSG00000197847.12	1.05141	1.21002	9.4495	0.00211207	0.00533048	SLC22A20
ENSG00000133265.10	1.05121	5.21648	37.2634	1.03202e-09	9.35566e-09	HSPBP1
ENSG00000140525.17	1.05063	5.28254	43.1194	5.14989e-11	5.94256e-10	FANCI
ENSG00000185298.12	1.05023	4.93933	49.2648	2.23642e-12	3.22051e-11	CCDC137
ENSG00000135723.13	1.04964	3.6241	31.6995	1.79965e-08	1.28474e-07	FHOD1
ENSG00000164070.11	1.04913	7.01265	52.4344	4.44872e-13	7.28186e-12	HSPA4L
ENSG00000104889.4	1.04762	3.58331	39.7744	2.85055e-10	2.86422e-09	RNASEH2A
ENSG00000167863.11	1.04713	6.03617	54.6525	1.43844e-13	2.57531e-12	ATP5H
ENSG00000175110.11	1.04693	5.14546	57.5385	3.31427e-14	6.4682e-13	MRPS22
ENSG00000181991.15	1.04665	4.75966	51.5966	6.81604e-13	1.07375e-11	MRPS11
ENSG00000141076.17	1.04639	5.4925	50.0989	1.46186e-12	2.15997e-11	CIRH1A
ENSG00000100739.10	1.04621	0.715872	5.68768	0.0170844	0.0336728	BDKRB1
ENSG00000174327.6	1.04599	3.17939	27.9361	1.25391e-07	7.69263e-07	SLC16A13
ENSG00000215021.8	1.04557	7.31576	55.3449	1.01132e-13	1.8554e-12	PHB2
ENSG00000092010.14	1.04556	5.95284	62.2599	3.00985e-15	6.82714e-14	PSME1
ENSG00000178163.7	1.04509	6.0344	60.3866	7.79422e-15	1.66432e-13	ZNF518B
ENSG00000253954.3	1.04425	0.0106095	15.2539	9.39822e-05	0.000322679	HMGN1P38
ENSG00000106244.12	1.04363	6.08021	54.2532	1.76251e-13	3.09619e-12	PDAP1
ENSG00000172183.14	1.04258	1.92447	12.8023	0.000346191	0.00105023	ISG20
ENSG00000171960.10	1.04186	4.29445	64.0801	1.1946e-15	2.84725e-14	PPIH
ENSG00000086189.9	1.04097	4.38595	48.5192	3.27064e-12	4.58985e-11	DIMT1
ENSG00000129667.12	1.04066	5.82908	24.461	7.58288e-07	4.01353e-06	RHBDF2
ENSG00000160888.6	1.04038	7.63791	15.2542	9.39671e-05	0.000322679	IER2
ENSG00000101310.14	1.0401	5.86867	42.4346	7.30864e-11	8.20764e-10	SEC23B
ENSG00000099364.16	1.03968	6.02788	50.3481	1.28758e-12	1.93207e-11	FBXL19
ENSG00000163918.10	1.03947	3.30157	31.2928	2.21903e-08	1.55817e-07	RFC4
ENSG00000130066.16	1.03927	6.34959	19.9116	8.11047e-06	3.48741e-05	SAT1
ENSG00000146232.14	1.03872	3.39892	18.4823	1.71492e-05	6.912e-05	NFKBIE
ENSG00000164904.15	1.03803	6.44404	47.0453	6.93654e-12	9.2178e-11	ALDH7A1
ENSG00000174145.7	1.03719	0.850668	8.18082	0.00423356	0.00985601	NWD2
ENSG00000233452.6	1.03657	1.0457	6.90945	0.00857412	0.01839	STXBP5-AS1
ENSG00000167460.14	1.03592	8.59854	20.4974	5.97121e-06	2.64987e-05	TPM4
ENSG00000198826.10	1.03537	4.95	38.6757	5.00397e-10	4.81469e-09	ARHGAP11A
ENSG00000167535.7	1.03466	4.82521	50.389	1.26097e-12	1.89361e-11	CACNB3
ENSG00000178982.9	1.03462	7.17251	52.0228	5.48599e-13	8.77849e-12	EIF3K
ENSG00000261359.2	1.03403	1.21286	22.1437	2.52988e-06	1.20985e-05	PYCARD-AS1
ENSG00000131153.8	1.03371	3.00451	24.551	7.23687e-07	3.8526e-06	GINS2
ENSG00000178952.8	1.03356	7.21676	52.5912	4.10731e-13	6.78057e-12	TUFM
ENSG00000040487.12	1.03348	3.58465	37.8386	7.68472e-10	7.15484e-09	PQLC2
ENSG00000068971.13	1.03339	4.1585	34.6984	3.84954e-09	3.1359e-08	PPP2R5B
ENSG00000148362.10	1.03319	4.14726	44.321	2.78709e-11	3.38417e-10	C9orf142
ENSG00000052749.13	1.03231	5.84199	37.6952	8.27066e-10	7.64134e-09	RRP12
ENSG00000169131.10	1.032	3.45779	32.1225	1.44752e-08	1.05166e-07	ZNF354A
ENSG00000175741.5	1.03108	0.451792	17.5695	2.76992e-05	0.00010699	RWDD4P2
ENSG00000117408.10	1.03034	5.34975	52.5123	4.27558e-13	7.01631e-12	IPO13
ENSG00000254413.8	1.0297	0.269278	9.19252	0.00243006	0.00602423	CHKB-CPT1B
ENSG00000068796.16	1.02933	5.77397	31.32	2.18813e-08	1.53815e-07	KIF2A
ENSG00000104904.12	1.02922	7.84346	52.7128	3.8606e-13	6.42543e-12	OAZ1
ENSG00000011009.10	1.02853	5.54313	40.1441	2.35899e-10	2.4169e-09	LYPLA2
ENSG00000128298.16	1.02815	1.13275	10.5396	0.00116842	0.00313408	BAIAP2L2
ENSG00000140104.13	1.02802	3.0882	24.6599	6.83936e-07	3.65714e-06	C14orf79
ENSG00000264920.1	1.02732	2.16455	17.4418	2.96234e-05	0.000113649	RP11-6N17.4
ENSG00000103423.13	1.02686	5.80864	51.7874	6.18478e-13	9.81522e-12	DNAJA3
ENSG00000163235.15	1.02637	4.95109	13.8362	0.000199456	0.000637903	TGFA
ENSG00000260852.1	1.02586	1.33602	17.3922	3.04071e-05	0.000116308	FBXL19-AS1
ENSG00000006555.10	1.02561	6.68523	32.0628	1.49266e-08	1.0816e-07	TTC22
ENSG00000188191.14	1.02498	3.26516	25.9915	3.42919e-07	1.94934e-06	PRKAR1B
ENSG00000065268.10	1.02495	5.06381	38.3993	5.76529e-10	5.47347e-09	WDR18
ENSG00000139618.14	1.02494	4.82169	21.4265	3.67647e-06	1.6989e-05	BRCA2
ENSG00000109919.9	1.02487	6.32415	50.7526	1.04771e-12	1.60079e-11	MTCH2
ENSG00000254332.1	1.02471	1.17634	10.7176	0.00106121	0.00286947	GS1-44D20.1
ENSG00000196405.12	1.02404	5.65988	27.5702	1.51492e-07	9.17131e-07	EVL
ENSG00000063587.13	1.02324	3.3603	27.3873	1.66524e-07	9.99659e-07	ZNF275
ENSG00000139182.13	1.02298	4.90864	16.899	3.94222e-05	0.000148002	CLSTN3
ENSG00000071626.16	1.02258	7.1759	96.318	9.78371e-23	6.7135e-21	DAZAP1
ENSG00000115053.15	1.02208	8.68734	39.6858	2.98286e-10	2.98627e-09	NCL
ENSG00000136888.6	1.02122	6.40774	39.1449	3.93495e-10	3.8495e-09	ATP6V1G1
ENSG00000226145.7	1.02084	3.31988	9.51601	0.00203687	0.00515893	KRT16P6
ENSG00000265354.3	1.02076	5.23239	43.768	3.69695e-11	4.38405e-10	TIMM23
ENSG00000184983.9	1.02035	5.21026	35.8013	2.18506e-09	1.86922e-08	NDUFA6
ENSG00000203995.9	1.01913	0.587504	7.21155	0.0072436	0.0158861	ZYG11A
ENSG00000272669.1	1.01888	0.305419	8.71315	0.00315923	0.00761358	RP3-508I15.21
ENSG00000279277.1	1.01871	0.044211	5.91013	0.015054	0.0301958	RP11-861A13.3
ENSG00000106305.9	1.01868	4.42808	43.3307	4.62267e-11	5.36631e-10	AIMP2
ENSG00000125863.17	1.01865	4.51593	38.4242	5.69224e-10	5.41479e-09	MKKS
ENSG00000111261.13	1.01858	5.76405	25.3219	4.85175e-07	2.66528e-06	MANSC1
ENSG00000225193.5	1.01848	1.6058	5.61891	0.0177677	0.034806	RPS12P26
ENSG00000167792.11	1.01613	6.79301	86.3317	1.52148e-20	7.52234e-19	NDUFV1
ENSG00000103966.9	1.0156	5.80521	27.4378	1.62226e-07	9.76296e-07	EHD4
ENSG00000169972.11	1.01532	3.88765	42.47	7.17742e-11	8.0791e-10	PUSL1
ENSG00000100462.15	1.0153	6.0411	47.6343	5.13629e-12	6.9745e-11	PRMT5
ENSG00000184840.11	1.01492	6.18952	42.0768	8.77566e-11	9.7081e-10	TMED9
ENSG00000090266.12	1.01462	4.35486	34.1885	5.00229e-09	3.98077e-08	NDUFB2
ENSG00000099817.11	1.01434	6.38789	43.646	3.93487e-11	4.65188e-10	POLR2E
ENSG00000105726.16	1.01426	6.14734	47.8918	4.50407e-12	6.16815e-11	ATP13A1
ENSG00000130021.13	1.01399	3.64953	22.8255	1.77399e-06	8.75043e-06	HDHD1
ENSG00000233276.3	1.01399	4.98423	18.923	1.36101e-05	5.60748e-05	GPX1
ENSG00000167676.4	1.01353	2.45323	5.34584	0.0207718	0.0398808	PLIN4
ENSG00000127184.10	1.01347	6.41444	40.1994	2.29317e-10	2.35447e-09	COX7C
ENSG00000183617.4	1.01325	4.20456	27.1587	1.87422e-07	1.11505e-06	MRPL54
ENSG00000007923.15	1.01321	6.09061	79.2744	5.40556e-19	2.06396e-17	DNAJC11
ENSG00000160072.19	1.01271	4.96344	24.8337	6.24957e-07	3.37169e-06	ATAD3B
ENSG00000081985.10	1.01234	3.47473	13.5647	0.000230477	0.000727104	IL12RB2
ENSG00000137700.16	1.0121	4.02072	54.0476	1.95688e-13	3.42711e-12	SLC37A4
ENSG00000070785.16	1.01176	4.19305	51.7144	6.41898e-13	1.01785e-11	EIF2B3
ENSG00000100479.12	1.01125	2.85033	34.9883	3.31691e-09	2.74139e-08	POLE2
ENSG00000231437.3	1.01102	0.503863	13.0029	0.000311006	0.000955211	RP11-88H9.2
ENSG00000139405.15	1.01091	4.31262	40.0188	2.51534e-10	2.56076e-09	RITA1
ENSG00000070081.15	1.01016	4.52655	18.934	1.35319e-05	5.58122e-05	NUCB2
ENSG00000188856.6	1.01013	2.66705	26.9837	2.05175e-07	1.21467e-06	RPSAP47
ENSG00000135624.15	1.0096	7.33552	42.3229	7.73808e-11	8.65462e-10	CCT7
ENSG00000171243.7	1.00935	5.38912	6.68456	0.00972517	0.020539	SOSTDC1
ENSG00000139514.12	1.00888	8.61621	29.5084	5.5675e-08	3.65269e-07	SLC7A1
ENSG00000165916.8	1.0083	6.08616	39.7795	2.8431e-10	2.85822e-09	PSMC3
ENSG00000122483.17	1.00779	2.98335	25.3597	4.7575e-07	2.61575e-06	CCDC18
ENSG00000108826.15	1.00686	4.6016	48.7565	2.89799e-12	4.11177e-11	MRPL27
ENSG00000164051.13	1.00646	3.02371	27.9254	1.26082e-07	7.73009e-07	CCDC51
ENSG00000128944.13	1.00641	3.35862	41.5162	1.16896e-10	1.26062e-09	KNSTRN
ENSG00000151239.13	1.00593	6.67545	31.7881	1.71944e-08	1.23204e-07	TWF1
ENSG00000174917.8	1.00547	4.51572	45.3246	1.66941e-11	2.09158e-10	C19orf70
ENSG00000170606.13	1.00543	7.21549	30.3036	3.69438e-08	2.49772e-07	HSPA4
ENSG00000126067.11	1.00531	7.01901	44.1971	2.9692e-11	3.57602e-10	PSMB2
ENSG00000116701.14	1.00524	3.60429	5.68036	0.0171559	0.033793	NCF2
ENSG00000249816.6	1.00512	1.9121	7.67744	0.00559153	0.0126189	LINC00964
ENSG00000170515.13	1.00463	7.60627	40.2004	2.29197e-10	2.35447e-09	PA2G4
ENSG00000116221.15	1.00356	6.22513	49.2382	2.2669e-12	3.26196e-11	MRPL37
ENSG00000163902.11	1.00335	7.35216	30.8948	2.724e-08	1.88394e-07	RPN1
ENSG00000167325.14	1.0032	7.34222	42.9025	5.75373e-11	6.57247e-10	RRM1
ENSG00000121270.15	1.00307	0.1685	12.6794	0.000369711	0.00111474	ABCC11
ENSG00000039650.9	1.00279	4.57268	47.872	4.54978e-12	6.21749e-11	PNKP
ENSG00000136628.17	1.00255	7.39774	40.5491	1.91734e-10	1.99731e-09	EPRS
ENSG00000258938.1	1.00211	0.697956	18.2763	1.91065e-05	7.63549e-05	RP11-317N8.5
ENSG00000109182.11	1.00207	6.2496	20.7085	5.34773e-06	2.39746e-05	CWH43
ENSG00000130706.12	1.00197	6.34389	53.6927	2.34437e-13	4.0433e-12	ADRM1
ENSG00000175634.14	1.00182	6.97187	37.8871	7.49586e-10	6.99837e-09	RPS6KB2
ENSG00000132819.16	1.00179	4.00187	47.1156	6.69209e-12	8.91755e-11	RBM38
ENSG00000122861.15	1.00171	5.23635	11.5771	0.000667677	0.00189214	PLAU
ENSG00000147883.10	1.00159	6.13259	29.2085	6.49927e-08	4.22661e-07	CDKN2B
ENSG00000188641.12	1.00158	4.49449	27.7488	1.38132e-07	8.41803e-07	DPYD
ENSG00000101003.9	1.00122	3.97655	30.0306	4.25288e-08	2.84704e-07	GINS1
ENSG00000115841.19	1.00071	2.75149	19.794	8.6255e-06	3.69347e-05	RMDN2
ENSG00000129187.14	1.00033	5.70449	48.7106	2.96663e-12	4.19989e-11	DCTD
ENSG00000167656.4	0.999323	8.84169	29.6907	5.06775e-08	3.34434e-07	LY6D
ENSG00000155660.10	0.999263	6.57681	35.5272	2.51512e-09	2.13547e-08	PDIA4
ENSG00000130165.10	0.999087	4.65163	39.8145	2.79268e-10	2.8134e-09	ELOF1
ENSG00000100600.14	0.998318	4.98757	45.2737	1.71333e-11	2.13829e-10	LGMN
ENSG00000187051.8	0.997943	4.36966	46.5809	8.79131e-12	1.1434e-10	RPS19BP1
ENSG00000115241.10	0.997885	5.89498	46.8399	7.70284e-12	1.01452e-10	PPM1G
ENSG00000078668.13	0.997469	5.62515	53.557	2.51198e-13	4.31694e-12	VDAC3
ENSG00000006712.14	0.997315	5.09832	56.2101	6.51268e-14	1.22038e-12	PAF1
ENSG00000112033.13	0.997269	5.86181	35.9677	2.00614e-09	1.72844e-08	PPARD
ENSG00000170417.14	0.996972	0.67146	13.6746	0.000217375	0.000690141	TMEM182
ENSG00000189001.10	0.99685	9.00334	12.721	0.000361577	0.00109261	SBSN
ENSG00000101365.20	0.996441	5.81033	60.0642	9.18139e-15	1.94545e-13	IDH3B
ENSG00000065057.7	0.995734	2.13305	26.0209	3.37745e-07	1.92276e-06	NTHL1
ENSG00000116574.5	0.995565	2.82574	8.9743	0.00273803	0.0066888	RHOU
ENSG00000154920.14	0.995402	1.13332	9.63069	0.00191353	0.0048815	EME1
ENSG00000103067.11	0.99539	7.54814	40.3549	2.11771e-10	2.1883e-09	ESRP2
ENSG00000275221.1	0.995292	3.66823	22.3154	2.3134e-06	1.1149e-05	HIST1H2AK
ENSG00000070010.18	0.995286	5.47229	58.5851	1.94681e-14	3.95974e-13	UFD1L
ENSG00000132109.9	0.995261	4.0619	25.4307	4.58559e-07	2.52988e-06	TRIM21
ENSG00000244038.9	0.994896	6.8198	45.6778	1.39396e-11	1.76599e-10	DDOST
ENSG00000136261.14	0.994776	6.45399	63.8968	1.31109e-15	3.10952e-14	BZW2
ENSG00000110921.11	0.994529	5.2967	25.4982	4.42791e-07	2.45201e-06	MVK
ENSG00000171223.5	0.994442	8.95503	10.4666	0.00121551	0.00324933	JUNB
ENSG00000120756.12	0.994323	3.48989	34.4428	4.3896e-09	3.53109e-08	PLS1
ENSG00000108961.13	0.994002	2.96098	29.8001	4.78975e-08	3.1792e-07	RANGRF
ENSG00000165678.19	0.993878	7.20171	39.8407	2.75539e-10	2.78165e-09	GHITM
ENSG00000266208.1	0.993776	4.06257	30.6402	3.10584e-08	2.1312e-07	CTD-2267D19.3
ENSG00000180992.6	0.993561	4.08381	35.6154	2.40375e-09	2.04722e-08	MRPL14
ENSG00000197798.8	0.993022	2.97075	43.8375	3.56811e-11	4.24955e-10	FAM118B
ENSG00000133619.17	0.992673	3.86584	32.4028	1.25304e-08	9.24649e-08	KRBA1
ENSG00000184357.4	0.992384	7.27038	20.7398	5.26111e-06	2.36248e-05	HIST1H1B
ENSG00000105063.18	0.992135	6.79248	52.5509	4.19251e-13	6.89761e-12	PPP6R1
ENSG00000197157.10	0.991929	7.56457	39.2441	3.74002e-10	3.67372e-09	SND1
ENSG00000113013.12	0.99056	7.87744	60.5808	7.06206e-15	1.51807e-13	HSPA9
ENSG00000104980.7	0.990155	4.84914	61.4108	4.63265e-15	1.01855e-13	TIMM44
ENSG00000158286.12	0.989924	2.05993	6.87721	0.00873017	0.0186894	RNF207
ENSG00000277879.1	0.989743	0.843774	8.40217	0.00374774	0.00884721	RP11-129M16.4
ENSG00000137267.5	0.988807	5.83287	12.3769	0.000434688	0.00128948	TUBB2A
ENSG00000160818.16	0.988778	3.56123	29.7923	4.8089e-08	3.18863e-07	GPATCH4
ENSG00000023734.10	0.988504	6.64864	38.0004	7.07293e-10	6.6204e-09	STRAP
ENSG00000227057.7	0.988283	5.42951	55.0778	1.15854e-13	2.10151e-12	WDR46
ENSG00000146425.10	0.98752	4.30618	44.6949	2.30251e-11	2.82423e-10	DYNLT1
ENSG00000065518.7	0.987396	5.99239	42.4676	7.18614e-11	8.0842e-10	NDUFB4
ENSG00000205476.8	0.985537	6.53793	30.2545	3.78905e-08	2.55545e-07	CCDC85C
ENSG00000001036.13	0.98527	3.84966	20.9028	4.83193e-06	2.18348e-05	FUCA2
ENSG00000229526.2	0.984497	0.197765	5.49621	0.0190578	0.0370286	KRT16P4
ENSG00000137857.17	0.983402	8.10659	15.3593	8.88846e-05	0.000306816	DUOX1
ENSG00000085760.14	0.982985	5.09898	51.6365	6.67873e-13	1.05384e-11	MTIF2
ENSG00000143549.19	0.982818	7.54826	36.3938	1.61216e-09	1.41363e-08	TPM3
ENSG00000142235.8	0.982527	2.55196	11.463	0.000709953	0.00200043	LMTK3
ENSG00000118263.14	0.982011	5.33513	25.6119	4.17452e-07	2.32841e-06	KLF7
ENSG00000187554.11	0.981579	3.25839	21.3139	3.89898e-06	1.79213e-05	TLR5
ENSG00000197451.10	0.981351	7.82381	63.2006	1.86695e-15	4.3424e-14	HNRNPAB
ENSG00000184207.8	0.981169	3.44209	38.6157	5.1601e-10	4.95997e-09	PGP
ENSG00000154102.10	0.981017	2.54816	15.8245	6.94951e-05	0.000245917	C16orf74
ENSG00000158710.14	0.98101	8.96314	26.1984	3.08077e-07	1.76691e-06	TAGLN2
ENSG00000181817.5	0.980764	3.62067	45.104	1.86848e-11	2.32195e-10	LSM10
ENSG00000125611.15	0.980568	3.4965	32.0412	1.50935e-08	1.09288e-07	CHCHD5
ENSG00000136824.18	0.980414	5.54706	20.1638	7.10865e-06	3.10251e-05	SMC2
ENSG00000114054.13	0.979289	4.69754	50.7529	1.04756e-12	1.60079e-11	PCCB
ENSG00000166562.8	0.978851	4.218	24.5208	7.35104e-07	3.90691e-06	SEC11C
ENSG00000140740.10	0.978308	7.11836	57.0922	4.1586e-14	8.04274e-13	UQCRC2
ENSG00000074582.12	0.978159	4.15106	31.0192	2.55486e-08	1.77523e-07	BCS1L
ENSG00000080824.18	0.977774	9.21808	32.799	1.02199e-08	7.67069e-08	HSP90AA1
ENSG00000177105.9	0.977751	5.00829	24.595	7.0734e-07	3.77391e-06	RHOG
ENSG00000204264.8	0.976481	5.50753	40.093	2.42159e-10	2.47577e-09	PSMB8
ENSG00000076003.4	0.976443	5.58976	35.7088	2.29132e-09	1.95666e-08	MCM6
ENSG00000188976.10	0.976363	6.78671	54.3839	1.64912e-13	2.91728e-12	NOC2L
ENSG00000121900.18	0.976095	6.12773	28.9054	7.60002e-08	4.87179e-07	TMEM54
ENSG00000157020.17	0.976057	5.9849	40.0583	2.46495e-10	2.51477e-09	SEC13
ENSG00000104067.16	0.975543	7.93192	35.8444	2.13717e-09	1.83232e-08	TJP1
ENSG00000105669.12	0.975539	6.12688	42.263	7.97864e-11	8.89787e-10	COPE
ENSG00000278828.1	0.97549	5.54153	23.7261	1.11063e-06	5.68647e-06	HIST1H3H
ENSG00000260196.1	0.97531	0.20631	7.27664	0.0069857	0.0153853	RP1-239B22.5
ENSG00000164520.11	0.975203	4.46272	11.9099	0.000558373	0.00161224	RAET1E
ENSG00000149499.11	0.975175	6.15928	35.8874	2.09058e-09	1.79477e-08	EML3
ENSG00000067836.12	0.975062	2.75854	30.2598	3.77868e-08	2.54935e-07	ROGDI
ENSG00000183258.11	0.974279	5.79907	75.3402	3.9622e-18	1.35459e-16	DDX41
ENSG00000124466.8	0.97423	9.62308	16.7207	4.33052e-05	0.000161013	LYPD3
ENSG00000106635.7	0.974152	4.98925	53.153	3.08547e-13	5.19144e-12	BCL7B
ENSG00000164182.10	0.974028	2.13617	17.4129	3.00772e-05	0.000115229	NDUFAF2
ENSG00000051596.9	0.974023	3.28195	22.5946	2.00044e-06	9.77015e-06	THOC3
ENSG00000232024.2	0.973855	1.53179	16.3862	5.16601e-05	0.000188123	LSM12P1
ENSG00000180801.12	0.973758	2.36524	5.82624	0.0157888	0.0314797	ARSJ
ENSG00000161800.12	0.97356	5.3491	36.5302	1.50318e-09	1.3259e-08	RACGAP1
ENSG00000078269.13	0.97188	4.85918	32.2706	1.34128e-08	9.82536e-08	SYNJ2
ENSG00000227403.1	0.971877	2.9776	18.1639	2.0268e-05	8.06453e-05	AC009299.3
ENSG00000143479.15	0.971218	1.96047	8.71884	0.00314938	0.00759365	DYRK3
ENSG00000063244.12	0.971052	7.385	50.2136	1.37889e-12	2.04836e-11	U2AF2
ENSG00000067057.16	0.970916	6.31629	37.441	9.42191e-10	8.58569e-09	PFKP
ENSG00000156261.12	0.97082	6.86573	48.2279	3.79453e-12	5.26754e-11	CCT8
ENSG00000173465.7	0.970384	3.68668	34.498	4.26681e-09	3.44093e-08	SSSCA1
ENSG00000124541.6	0.970087	5.35031	35.2376	2.91836e-09	2.44766e-08	RRP36
ENSG00000115233.11	0.969433	5.98803	37.64	8.50808e-10	7.83069e-09	PSMD14
ENSG00000141378.14	0.969263	3.81265	40.1239	2.38351e-10	2.43943e-09	PTRH2
ENSG00000115163.14	0.967999	3.19307	18.5842	1.62563e-05	6.58794e-05	CENPA
ENSG00000103274.10	0.967706	3.89929	41.7142	1.0564e-10	1.14758e-09	NUBP1
ENSG00000168701.18	0.96768	3.36686	32.0618	1.49346e-08	1.08177e-07	TMEM208
ENSG00000134440.11	0.967567	7.10197	52.3235	4.70702e-13	7.67857e-12	NARS
ENSG00000240859.1	0.967556	1.12526	12.0475	0.000518614	0.00151083	AC093627.10
ENSG00000155189.11	0.96722	4.27805	20.2551	6.77739e-06	2.96936e-05	AGPAT5
ENSG00000118894.14	0.966984	3.13507	25.6738	4.04275e-07	2.26017e-06	EEF2KMT
ENSG00000132967.9	0.966886	3.06256	24.8606	6.16291e-07	3.32866e-06	HMGB1P5
ENSG00000024526.16	0.966773	3.61126	20.4011	6.27953e-06	2.77265e-05	DEPDC1
ENSG00000068438.14	0.966041	5.20991	42.0074	9.0929e-11	1.0036e-09	FTSJ1
ENSG00000154760.13	0.965937	2.4329	15.1235	0.000100701	0.000343789	SLFN13
ENSG00000258929.6	0.965758	0.914487	10.9366	0.000942811	0.00258192	RP11-58E21.3
ENSG00000103995.13	0.965705	3.80423	23.195	1.46376e-06	7.32905e-06	CEP152
ENSG00000100714.15	0.964955	6.26254	61.3418	4.79786e-15	1.05367e-13	MTHFD1
ENSG00000146731.10	0.96338	7.23237	45.7878	1.31785e-11	1.67727e-10	CCT6A
ENSG00000187961.13	0.963097	2.89466	17.584	2.74887e-05	0.000106271	KLHL17
ENSG00000159527.3	0.961996	5.5375	19.2281	1.15992e-05	4.83998e-05	PGLYRP3
ENSG00000165502.6	0.961735	4.5158	27.0364	1.99663e-07	1.18422e-06	RPL36AL
ENSG00000071127.16	0.960791	7.86451	29.1417	6.72746e-08	4.36177e-07	WDR1
ENSG00000164543.5	0.960087	3.82505	17.0492	3.6423e-05	0.000137465	STK17A
ENSG00000182810.6	0.96006	4.01768	39.5108	3.2625e-10	3.2544e-09	DDX28
ENSG00000226085.3	0.959472	0.914372	8.78152	0.00304298	0.00736934	UQCRFS1P1
ENSG00000119421.6	0.959101	3.79679	33.2245	8.2111e-09	6.24808e-08	NDUFA8
ENSG00000183684.7	0.958117	5.35054	41.4107	1.23378e-10	1.32534e-09	ALYREF
ENSG00000140691.16	0.957507	4.47165	36.1014	1.87317e-09	1.62184e-08	ARMC5
ENSG00000143256.4	0.957297	2.30912	17.3992	3.02949e-05	0.000115902	PFDN2
ENSG00000229119.3	0.957145	0.598613	8.14547	0.00431689	0.0100275	CTB-63M22.1
ENSG00000062485.18	0.956876	7.60384	65.4016	6.10905e-16	1.50633e-14	CS
ENSG00000261040.6	0.956808	3.41405	8.85838	0.00291747	0.00709748	WFDC21P
ENSG00000125388.19	0.956615	2.38849	15.0694	0.000103627	0.000352778	GRK4
ENSG00000109066.13	0.956196	4.45922	33.664	6.55006e-09	5.09678e-08	TMEM104
ENSG00000265688.1	0.955905	1.14135	11.565	0.000672034	0.00190365	MAFG-AS1
ENSG00000118971.7	0.955704	7.6637	11.7399	0.000611737	0.00175164	CCND2
ENSG00000124784.8	0.955531	4.64292	47.6235	5.16458e-12	7.00798e-11	RIOK1
ENSG00000115657.12	0.95538	2.14222	16.6041	4.60511e-05	0.000169879	ABCB6
ENSG00000007080.10	0.95487	4.75064	30.6378	3.10979e-08	2.13315e-07	CCDC124
ENSG00000174437.16	0.954843	8.73033	40.2887	2.1907e-10	2.25888e-09	ATP2A2
ENSG00000161618.9	0.954584	4.99311	36.5049	1.52286e-09	1.34116e-08	ALDH16A1
ENSG00000108771.12	0.954579	3.65268	15.7303	7.30458e-05	0.000256879	DHX58
ENSG00000127884.4	0.954365	5.62294	42.4953	7.08532e-11	7.98942e-10	ECHS1
ENSG00000162377.5	0.954263	4.92424	43.1043	5.18976e-11	5.98141e-10	COA7
ENSG00000140990.14	0.954045	5.16975	35.985	1.98841e-09	1.71393e-08	NDUFB10
ENSG00000158042.8	0.953516	4.53252	42.954	5.60427e-11	6.42458e-10	MRPL17
ENSG00000106245.9	0.951816	4.79315	43.4889	4.26376e-11	5.00064e-10	BUD31
ENSG00000130312.6	0.951789	4.18388	44.0051	3.27521e-11	3.91765e-10	MRPL34
ENSG00000165891.15	0.951592	3.1978	21.109	4.33889e-06	1.97644e-05	E2F7
ENSG00000127774.6	0.951516	3.73927	33.8057	6.08993e-09	4.77536e-08	EMC6
ENSG00000169857.7	0.951458	3.53228	33.1193	8.66748e-09	6.58496e-08	AVEN
ENSG00000183155.4	0.950138	4.15415	39.6528	3.03364e-10	3.03396e-09	RABIF
ENSG00000258472.8	0.949621	1.12206	11.1369	0.000846253	0.00234311	RP11-192H23.4
ENSG00000058262.9	0.949143	7.90383	34.4117	4.46039e-09	3.58355e-08	SEC61A1
ENSG00000121073.13	0.949101	4.92661	58.778	1.76507e-14	3.61681e-13	SLC35B1
ENSG00000163528.12	0.949047	3.43741	35.5176	2.52763e-09	2.14514e-08	CHCHD4
ENSG00000113712.16	0.949023	8.76712	50.4452	1.22538e-12	1.84447e-11	CSNK1A1
ENSG00000205155.7	0.948369	3.31178	23.4599	1.27544e-06	6.46163e-06	PSENEN
ENSG00000204253.4	0.948075	2.36106	13.132	0.000290295	0.000897173	HNRNPCP2
ENSG00000105993.14	0.947833	7.21299	30.0615	4.18551e-08	2.80518e-07	DNAJB6
ENSG00000109519.12	0.947722	4.88199	43.4097	4.43985e-11	5.18216e-10	GRPEL1
ENSG00000127540.11	0.946564	3.69255	36.0135	1.95959e-09	1.69059e-08	UQCR11
ENSG00000171403.9	0.946294	1.76976	5.24538	0.0220052	0.041977	KRT9
ENSG00000172782.11	0.946119	3.08025	12.4101	0.000427011	0.00126945	FADS6
ENSG00000118680.12	0.945731	7.54527	28.7044	8.43138e-08	5.34431e-07	MYL12B
ENSG00000138271.5	0.945725	5.24831	27.6361	1.46424e-07	8.88681e-07	GPR87
ENSG00000136463.7	0.9457	3.85105	37.9759	7.16226e-10	6.69751e-09	TACO1
ENSG00000108821.13	0.945532	4.1817	21.2246	4.08494e-06	1.86969e-05	COL1A1
ENSG00000157693.14	0.945532	3.90427	32.8194	1.01128e-08	7.59625e-08	C9orf91
ENSG00000104886.9	0.945199	4.67904	48.1052	4.03944e-12	5.5794e-11	PLEKHJ1
ENSG00000198431.15	0.945124	5.37348	22.1513	2.51987e-06	1.20626e-05	TXNRD1
ENSG00000185238.12	0.944387	4.90946	69.9299	6.14486e-17	1.80893e-15	PRMT3
ENSG00000104969.9	0.944144	5.6895	38.2058	6.36617e-10	5.98793e-09	SGTA
ENSG00000059691.11	0.944061	4.64742	39.8547	2.73574e-10	2.76326e-09	GATB
ENSG00000174177.12	0.942128	3.56565	37.2167	1.05703e-09	9.57334e-09	CTU2
ENSG00000115946.7	0.941414	4.37497	28.4369	9.68046e-08	6.08008e-07	PNO1
ENSG00000125149.11	0.941394	5.90107	35.2063	2.96559e-09	2.48358e-08	C16orf70
ENSG00000167004.12	0.940769	7.63192	37.7941	7.86183e-10	7.29859e-09	PDIA3
ENSG00000120438.11	0.940407	7.32404	53.848	2.16611e-13	3.76279e-12	TCP1
ENSG00000183570.16	0.940015	0.580632	5.29335	0.021407	0.0409697	PCBP3
ENSG00000088986.10	0.939708	7.86792	26.7511	2.31416e-07	1.35793e-06	DYNLL1
ENSG00000118513.18	0.939269	4.00428	23.2757	1.4036e-06	7.04981e-06	MYB
ENSG00000099365.9	0.93862	2.73188	12.9317	0.000323064	0.000987615	STX1B
ENSG00000183199.6	0.938114	0.851987	17.0807	3.58236e-05	0.000135388	HSP90AB3P
ENSG00000174109.4	0.937686	3.12674	25.8183	3.75112e-07	2.11365e-06	C16orf91
ENSG00000062582.13	0.937364	0.767991	14.8111	0.000118836	0.000399616	MRPS24
ENSG00000101412.12	0.937115	3.50579	36.7942	1.31281e-09	1.17139e-08	E2F1
ENSG00000189171.13	0.937098	3.03874	22.94	1.67135e-06	8.28668e-06	S100A13
ENSG00000280214.1	0.93705	0.605895	5.69034	0.0170585	0.03363	CTD-2012K14.5
ENSG00000178802.17	0.936552	4.32732	35.3196	2.79809e-09	2.34986e-08	MPI
ENSG00000014257.15	0.936428	6.52385	19.4124	1.05321e-05	4.43503e-05	ACPP
ENSG00000245532.5	0.936377	11.7785	9.69162	0.0018511	0.00474073	NEAT1
ENSG00000113312.10	0.936082	4.97398	33.8324	6.0069e-09	4.71408e-08	TTC1
ENSG00000131475.6	0.935625	5.19609	35.3202	2.79714e-09	2.34986e-08	VPS25
ENSG00000197238.4	0.935203	1.32834	13.0265	0.000307122	0.000944635	HIST1H4J
ENSG00000271936.1	0.935031	0.598173	13.5077	0.000237581	0.000747681	RP11-443B20.1
ENSG00000165626.16	0.934915	2.03609	8.74435	0.00310562	0.00750314	BEND7
ENSG00000144029.11	0.93431	4.75885	48.0621	4.12928e-12	5.69126e-11	MRPS5
ENSG00000164574.15	0.933945	4.82258	41.3591	1.26679e-10	1.35853e-09	GALNT10
ENSG00000171428.13	0.933457	1.92987	15.7361	7.28199e-05	0.000256178	NAT1
ENSG00000260231.1	0.93329	3.65975	12.0927	0.000506188	0.00147749	JHDM1D-AS1
ENSG00000133835.14	0.933198	7.31783	61.1604	5.261e-15	1.14495e-13	HSD17B4
ENSG00000140564.10	0.933087	7.66005	32.5976	1.13352e-08	8.42582e-08	FURIN
ENSG00000187624.8	0.933022	2.45243	11.0072	0.00090757	0.00249391	C17orf97
ENSG00000131944.9	0.932802	1.19825	14.8169	0.000118472	0.000398529	FAAP24
[truncated: 1,592 more rows]
