# Supplementary material for: Loss of epidermal microRNA-149 sensitizes to skin inflammation
Source: Research Square preprint supplement (doi:10.21203/rs.3.rs-6047392/v1), 2025-07-29
Supplement: Supplementary file 8 [file d0d2bfb623d1ce961f42319f.xlsx]

## Sheet: KC_leiden_2_015_DEG_P_by_score_
Cluster	Gene	P_adj	Log2FC	Scores
0	KRT5	0	3.47584080696106	115.062934875488
0	KRT14	0	3.61130928993225	112.757904052734
0	CCND2	0	2.2147262096405	94.093620300293
0	FTH1	0	1.40612196922302	93.0239105224609
0	COL17A1	0	1.76886940002441	87.9702911376953
0	TGFBI	0	1.53828585147858	84.8301620483398
0	SLC6A6	0	1.75130105018616	84.0102462768555
0	SMOC2	0	2.51383471488953	83.0813598632812
0	DST	0	1.69152879714966	82.9195938110352
0	ANTXR1	0	2.98344993591309	81.6394805908203
0	CDH13	0	2.46599698066711	79.3671798706055
0	ITGA6	0	1.48358023166656	77.6948776245117
0	SLC4A8	0	2.56809067726135	77.2644729614258
0	SOX6	0	1.78322780132294	77.1089172363281
0	TSPO	0	1.48233950138092	74.1503295898438
0	S100A6	0	2.01904487609863	73.8159103393555
0	IFITM3	0	1.71567475795746	72.1274948120117
0	KRT15	0	2.3547158241272	71.5430526733398
0	FTL1	0	1.68063080310822	70.9734420776367
0	FOS	0	1.72882127761841	70.4001083374023
0	ITGB4	0	1.63743567466736	70.2517623901367
0	POSTN	0	1.69325339794159	67.2570037841797
0	TNFRSF19	0	1.59132599830627	66.6764984130859
0	WLS	0	1.29963862895966	66.6007766723633
0	APOE	0	0.747155249118805	66.3143920898438
0	CCND1	0	1.93302524089813	66.2101669311523
0	ATF3	0	1.19495928287506	64.4871673583984
0	FCGBP	0	1.3297404050827	64.3427352905273
0	JAG2	0	2.1315495967865	64.2974395751953
0	NFIX	0	0.929720103740692	63.367244720459
0	FGFR2	0	1.04821467399597	62.7063674926758
0	MT2	0	1.27878832817078	62.2915687561035
0	LAMB3	0	1.67058193683624	61.9054985046387
0	BCAM	0	1.44492900371552	60.7021789550781
0	1700025G04RIK	0	1.39259171485901	60.3037948608398
0	NFIA	0	1.42073702812195	60.051830291748
0	RBBP8	0	1.47165334224701	59.9661026000977
0	SOCS3	0	1.82493853569031	58.5248413085938
0	BHLHE40	0	1.24055147171021	58.4532089233398
0	TXNDC17	0	0.733084082603455	58.0829925537109
0	SLCO2A1	0	2.11998319625854	57.879322052002
0	MT1	0	1.02112185955048	57.7690238952637
0	GPX1	0	0.735606908798218	57.4546241760254
0	CAPG	0	1.06723940372467	57.3352432250977
0	CRISPLD2	0	2.0976345539093	57.0741653442383
0	NFIC	0	1.38681411743164	56.5531349182129
0	ITGB1	0	1.19974529743195	55.0390357971191
0	UQCRC1	0	0.913162589073181	54.3216094970703
0	ZFP36L2	0	1.10659158229828	54.0576667785645
0	JUNB	0	0.86358904838562	53.8127250671387
Cluster	Gene	P_adj	Log2FC	Scores
1	CALM4	0	3.97216963768005	123.633712768555
1	KRT10	0	4.60449123382568	122.926788330078
1	KRTDAP	0	4.04609870910645	122.600158691406
1	DSG1A	0	2.52065944671631	119.360321044922
1	FAM25C	0	2.37167310714722	119.181983947754
1	LGALS3	0	1.56019532680511	112.783874511719
1	KRT2	0	4.08003091812134	112.200210571289
1	PERP	0	1.21665704250336	109.038055419922
1	ELOVL4	0	3.40747046470642	108.742485046387
1	GLTP	0	2.28944039344788	107.983749389648
1	PRDX5	0	2.0103440284729	107.093276977539
1	DBI	0	1.88540959358215	103.778175354004
1	ACER1	0	3.10015058517456	103.28694152832
1	PYCARD	0	2.00362992286682	103.043128967285
1	DMKN	0	2.05886340141296	102.564414978027
1	MT4	0	3.76510691642761	101.734115600586
1	RAB25	0	1.91447293758392	100.933990478516
1	TMPRSS4	0	2.8072681427002	98.8015060424805
1	SBSN	0	3.27939391136169	98.6293029785156
1	PKP1	0	1.55892693996429	97.0911483764648
1	ITM2B	0	0.982319355010986	96.7018051147461
1	THEM5	0	2.3897602558136	93.485595703125
1	FABP5	0	2.9453547000885	93.2024383544922
1	ENDOU	0	2.86709642410278	92.8418197631836
1	SPTSSA	0	1.72950255870819	92.065055847168
1	LY6D	0	1.53229081630707	91.402473449707
1	SKINT6	0	3.56776356697083	90.7686462402344
1	SERPINB5	0	1.44129526615143	90.5805892944336
1	ACSL1	0	2.06881380081177	89.5001831054688
1	OAS1F	0	1.98677456378937	88.554801940918
1	CST6	0	2.49311470985413	87.3965072631836
1	CLIP4	0	2.35691404342651	86.9455490112305
1	POF1B	0	1.85676050186157	86.8703002929688
1	JUP	0	1.17709863185883	86.223014831543
1	SERPINB3B	0	2.16068935394287	86.0726318359375
1	SDR16C5	0	2.47418308258057	85.8713836669922
1	GM94	0	3.80750226974487	85.0038070678711
1	BBOX1	0	2.36742091178894	84.6831665039062
1	LY6G6C	0	3.1717643737793	84.5541687011719
1	DSP	0	1.05606496334076	84.262825012207
1	ANXA8	0	1.02445673942566	84.0891723632812
1	TRIM29	0	1.10706412792206	83.0099258422852
1	SKINT5	0	3.65761041641235	81.3695068359375
1	ABLIM1	0	2.17788624763489	80.9439926147461
1	PRXL2B	0	2.60849094390869	80.6568450927734
1	GGCT	0	1.90057325363159	80.1457138061523
1	PLA2G4F	0	2.83751916885376	79.3394622802734
1	DSG1B	0	2.17425227165222	79.1234664916992
1	CALM5	0	2.75828909873962	78.74072265625
1	LGALS7	0	0.840487539768219	78.5545349121094
Cluster	Gene	P_adj	Log2FC	Scores
2	SERPINB2	0	3.63598895072937	116.885673522949
2	IFI202B	0	4.14528179168701	113.603469848633
2	IRF6	0	2.31596517562866	105.395782470703
2	PLET1	0	3.25083494186401	104.9599609375
2	CD44	0	2.18047428131104	102.893821716309
2	RAP2B	0	2.75752425193787	100.570297241211
2	SLC22A23	0	2.57675266265869	99.672477722168
2	TACSTD2	0	1.8601416349411	98.6445693969727
2	EGFR	0	2.10529112815857	98.4205169677734
2	CCDC71L	0	3.54463720321655	97.8658065795898
2	RBMS1	0	1.7581193447113	97.7930374145508
2	CLDN1	0	2.30394339561462	95.3396987915039
2	GK	0	2.59304904937744	91.3422012329102
2	MAST4	0	1.84994566440582	89.203987121582
2	TMCC3	0	2.30211043357849	88.3943710327148
2	MAP7D1	0	2.30037093162537	88.3067779541016
2	ARID5B	0	1.67730700969696	87.1671905517578
2	CXCL16	0	2.09693765640259	87.0463409423828
2	SLC6A14	0	3.55254101753235	86.2816009521484
2	STX11	0	2.74905228614807	85.9550628662109
2	ZDHHC21	0	2.06578588485718	85.5266647338867
2	ACTG1	0	1.17306983470917	85.4697799682617
2	DENND2C	0	1.65610682964325	85.197509765625
2	EHF	0	1.85239446163177	83.6950836181641
2	CDCP1	0	1.86590254306793	83.1325912475586
2	NFKB1	0	1.7251638174057	82.4575347900391
2	TJP2	0	1.73065447807312	82.3475570678711
2	SGMS1	0	1.64544820785522	82.1030731201172
2	KRT16	0	3.38973784446716	82.0514984130859
2	ANXA1	0	1.41205620765686	81.731201171875
2	SFN	0	1.12316703796387	80.9598236083984
2	MET	0	2.20130681991577	80.7693099975586
2	MYO1E	0	1.4324357509613	80.5282821655273
2	PDE4B	0	1.90696036815643	79.6808929443359
2	SMOX	0	2.24715352058411	79.0569229125977
2	BTG1	0	1.40421569347382	78.5428161621094
2	EIF5	0	1.2761777639389	78.2841033935547
2	NIPAL1	0	2.23724675178528	77.750846862793
2	PPIF	0	2.8299720287323	77.3968963623047
2	CAST	0	1.21178913116455	77.1948165893555
2	PIM1	0	1.66575574874878	76.9777908325195
2	PHLDA1	0	2.23832011222839	76.7888641357422
2	PRRG4	0	2.01108407974243	76.5390090942383
2	NOCT	0	2.02983498573303	76.0712203979492
2	CAMK2D	0	1.84986686706543	74.7512283325195
2	ABCA12	0	2.13853764533997	74.4798126220703
2	FAM135A	0	1.5112841129303	74.3253479003906
2	KDM6B	0	1.68074262142181	74.2384719848633
2	TSPAN5	0	1.5442453622818	74.1156158447266
2	JAK2	0	1.74690723419189	73.2925109863281
Cluster	Gene	P_adj	Log2FC	Scores
3	SOX9	0	3.83812236785889	56.0151596069336
3	GSTM5	0	3.12103724479675	50.7630004882812
3	KRT79	0	8.51695442199707	47.6841621398926
3	ADGRL2	0	1.97637748718262	44.592113494873
3	GAS7	0	4.70820665359497	43.5657157897949
3	RBP1	0	5.7107572555542	43.4571418762207
3	REEP5	0	1.16534030437469	40.5747032165527
3	MGST1	0	3.95300316810608	40.1420669555664
3	EMB	0	2.36666250228882	39.5308570861816
3	ALDH3A1	0	2.436119556427	38.809253692627
3	KRT17	6.25167870256412e-299	3.08017778396606	37.1423683166504
3	EFNB2	2.17102173467056e-289	2.27324295043945	36.5445365905762
3	GPX4	1.5134405409492e-284	1.56983113288879	36.2364196777344
3	KALRN	1.66528341235518e-279	4.29130744934082	35.9130859375
3	BACH2	3.84376788817821e-268	2.55343008041382	35.1766929626465
3	PTPRK	2.08383580738706e-262	2.97267556190491	34.7963523864746
3	AKR1C18	7.70220742174906e-262	7.51805257797241	34.7580261230469
3	SLIT3	1.29962279193854e-252	5.41785383224487	34.140308380127
3	OSBPL3	6.02276230571002e-245	1.86765396595001	33.6176109313965
3	ALCAM	7.0733682159824e-241	2.62286281585693	33.3372497558594
3	BLNK	8.83606905473432e-236	2.56388092041016	32.9823265075684
3	C1QTNF12	5.80751575234327e-235	2.06418538093567	32.9245910644531
3	ACSL4	5.99868126384322e-226	2.54971981048584	32.2861099243164
3	AOPEP	3.09029426903745e-225	1.19111585617065	32.2347450256348
3	DEFB6	1.17584025393797e-224	3.08686327934265	32.1927108764648
3	MT-CO1	7.23046325499131e-215	0.354979604482651	31.4831771850586
3	NEBL	3.78839029992629e-213	3.83587765693665	31.3567543029785
3	EPCAM	1.27627468975366e-202	1.36547541618347	30.5715370178223
3	LDHB	1.5088538200279e-202	2.36217665672302	30.5655612945557
3	PLET1	2.75786624015731e-202	1.73124670982361	30.5453453063965
3	ARHGAP24	7.1484646750864e-202	4.24732065200806	30.5136890411377
3	PAWR	1.47649286296276e-194	1.50905168056488	29.9562377929688
3	MAP1LC3A	2.11185623160688e-194	1.12704718112946	29.9438228607178
3	RUNX1	1.50315032215949e-191	2.23814702033997	29.7234477996826
3	CSRP1	3.17194241741444e-190	1.37072861194611	29.6203231811523
3	ENDOD1	1.24419073202098e-183	3.57410359382629	29.1019973754883
3	PLIN2	2.39378716883769e-183	5.37071657180786	29.0790786743164
3	CACHD1	3.04570962767367e-175	1.83520495891571	28.4282398223877
3	TPM1	1.51258133319205e-174	1.88353860378265	28.3714561462402
3	IER3	1.93456375389727e-173	1.39152383804321	28.281177520752
3	RETREG1	6.01724964000292e-172	1.30083727836609	28.1591110229492
3	MYO1D	3.22377011831598e-168	1.3191990852356	27.850887298584
3	DPYSL3	3.12927015495508e-166	5.4640531539917	27.685546875
3	CALML3	6.35874410655239e-164	2.43045878410339	27.4920272827148
3	FST	7.73800491012864e-163	2.49777364730835	27.4007244110107
3	MSRB3	4.69721913981342e-162	3.26282024383545	27.3345413208008
3	MT-CYTB	1.61057122957275e-152	0.358942449092865	26.5166454315186
3	TNIP1	2.51708367058378e-152	1.51022720336914	26.4994792938232
3	BARX2	5.67842014652744e-151	2.82491207122803	26.381103515625
3	ADGRL3	9.89170213889687e-151	3.25684475898743	26.3594093322754
Cluster	Gene	P_adj	Log2FC	Scores
4	PTPRK	0	5.520263671875	69.0570068359375
4	FTL1	0	2.79280090332031	64.1484680175781
4	TENM2	0	4.69187259674072	61.1298942565918
4	FOXP1	0	2.51354432106018	59.9893226623535
4	KRT15	0	3.97827768325806	58.8603019714355
4	ALCAM	0	4.50183439254761	57.0948753356934
4	NFIB	0	2.23539638519287	57.0768127441406
4	PTN	0	3.44997239112854	56.9991493225098
4	ENOX1	0	7.41826200485229	56.0254783630371
4	APP	0	1.47741174697876	54.4779586791992
4	TCF12	0	2.3281946182251	54.3798942565918
4	AOPEP	0	2.30181527137756	53.1858062744141
4	SEMA3E	0	5.67663145065308	53.1764183044434
4	GM973	0	5.40362405776978	52.6962585449219
4	RUNX1	0	4.3300256729126	52.6245765686035
4	EMB	0	3.52528595924377	51.2375411987305
4	AUTS2	0	2.8822066783905	50.9605674743652
4	ACTN1	0	4.04706859588623	50.7113571166992
4	CRIP1	0	3.90010118484497	50.4784164428711
4	SOX9	0	3.89266610145569	50.1126022338867
4	FGFR1	0	3.9279990196228	49.4911003112793
4	MACF1	0	1.68663430213928	49.4397621154785
4	S100A6	0	2.42791152000427	49.4135398864746
4	ADGRA3	0	5.00875329971313	49.1345405578613
4	LGR5	0	8.30537509918213	48.2959480285645
4	BNC2	0	3.40025854110718	47.8332633972168
4	SH3RF1	0	3.06622242927551	47.1568069458008
4	FST	0	4.50237560272217	46.5452499389648
4	GOLIM4	0	2.01192307472229	46.5294494628906
4	CALD1	0	5.87295866012573	45.9267692565918
4	TGM5	0	5.56808757781982	45.6285209655762
4	TRPS1	0	2.77224612236023	45.6239204406738
4	SETBP1	0	6.12351703643799	45.0343437194824
4	NAALADL2	0	3.17294502258301	43.953540802002
4	SGCD	0	5.5425124168396	43.3742256164551
4	AFDN	0	1.67891347408295	41.6981506347656
4	LHX2	0	6.64551544189453	41.5728378295898
4	COL17A1	0	1.45971703529358	41.2509994506836
4	CAV1	0	2.87542986869812	40.855583190918
4	ADGRL3	0	4.77722215652466	40.6305274963379
4	CPNE8	0	1.86509716510773	39.9792976379395
4	MITF	0	3.95494556427002	39.8788032531738
4	CADM1	0	1.83645558357239	38.9578018188477
4	NEDD9	0	3.99709177017212	38.8939781188965
4	CRIM1	0	1.5571471452713	38.548526763916
4	RAPGEF2	0	2.09098267555237	38.4863510131836
4	TCF7L2	0	2.03498482704163	37.8730278015137
4	TPM1	1.9729397872956e-297	2.53426599502563	37.0031890869141
4	NEDD4	4.44716164664515e-292	1.10153603553772	36.6678924560547
4	SLC6A6	4.81099614485741e-292	1.52033376693726	36.6655693054199
Cluster	Gene	P_adj	Log2FC	Scores
5	HMGB2	0	3.3216986656189	67.0384902954102
5	STMN1	0	4.79641437530518	66.4242553710938
5	MKI67	0	5.43031072616577	65.9505081176758
5	H2AFZ	0	2.81375551223755	64.9523849487305
5	HMGB1	0	2.3111743927002	63.6748504638672
5	CDCA8	0	5.65652799606323	63.0396728515625
5	SMC4	0	3.5971405506134	62.7940406799316
5	BIRC5	0	6.67709445953369	62.6038551330566
5	H2AFV	0	3.1529176235199	61.0282325744629
5	TOP2A	0	5.95582342147827	60.6833534240723
5	ANLN	0	5.62378597259521	60.3745994567871
5	SMC2	0	4.73247671127319	60.1035079956055
5	CDCA3	0	6.20492601394653	59.9726676940918
5	CCDC34	0	3.81406569480896	58.9242858886719
5	CENPA	0	6.12865209579468	58.4679527282715
5	UBE2S	0	2.36269426345825	58.3102188110352
5	CENPF	0	6.99301147460938	57.9430541992188
5	PTMA	0	1.21102607250214	56.5251159667969
5	PRC1	0	4.467200756073	56.4519653320312
5	CKS2	0	3.0510458946228	56.1708679199219
5	RACGAP1	0	5.93359756469727	56.0647163391113
5	TUBB5	0	3.46055459976196	56.0249176025391
5	SPC24	0	5.50613594055176	55.5800628662109
5	HMMR	0	7.0096321105957	55.3918685913086
5	TPX2	0	5.76005363464355	55.2373962402344
5	HMGN2	0	3.14512920379639	54.6870765686035
5	NUCKS1	0	2.0868194103241	54.134838104248
5	DIAPH3	0	3.81036829948425	53.8555641174316
5	CENPE	0	5.77093029022217	53.7265739440918
5	CCNB2	0	5.97234964370728	53.3763275146484
5	DEK	0	2.14208173751831	53.0100059509277
5	UBE2C	0	7.13541650772095	52.7738761901855
5	PCLAF	0	5.56536674499512	52.4305000305176
5	CDK1	0	6.16195631027222	52.1524810791016
5	KNL1	0	6.28517055511475	51.8858528137207
5	CDC20	0	5.47215557098389	51.8729934692383
5	ANP32E	0	2.34470891952515	50.797119140625
5	SELENOH	0	2.7433614730835	50.7927131652832
5	NUSAP1	0	6.39832258224487	50.5775680541992
5	KIF23	0	4.93775320053101	50.3725700378418
5	ECT2	0	4.97149801254272	49.9966926574707
5	CKAP2L	0	4.50965023040771	49.8765830993652
5	RRM1	0	3.21382141113281	49.7602767944336
5	PTN	0	2.75762248039246	49.6502342224121
5	KIF11	0	6.13015985488892	49.5745315551758
5	INCENP	0	4.72478675842285	48.9741172790527
5	RBM3	0	1.13961851596832	48.8751373291016
5	RAN	0	1.60193657875061	48.6297264099121
5	CKS1B	0	3.15427088737488	48.5023651123047
5	HINT1	0	1.42608284950256	48.218204498291
Cluster	Gene	P_adj	Log2FC	Scores
6	SRGN	1.30609031053464e-49	8.09390449523926	15.4807710647583
6	DOCK10	1.89050805999941e-27	8.46582126617432	11.6948461532593
6	VIM	2.45722648957015e-27	5.27965974807739	11.6380290985107
6	ELMO1	1.04193397110201e-26	3.54398250579834	11.4893188476562
6	PTPRC	5.22869419052562e-26	8.79554557800293	11.3295879364014
6	ZEB1	1.41566345099882e-20	6.71881580352783	10.1432857513428
6	RGS2	1.19993859732984e-19	2.62031173706055	9.91909885406494
6	DENND4A	1.74801182127474e-19	1.96176362037659	9.85909271240234
6	LAPTM5	2.94250956689471e-19	8.44448566436768	9.79703521728516
6	RAB8B	3.73932140618452e-18	1.23122143745422	9.51943588256836
6	RGS1	1.68943732326699e-17	7.72058153152466	9.35359287261963
6	LCP1	3.11899519989093e-17	8.27307224273682	9.28009510040283
6	ZEB2	3.14673721082112e-17	6.28524208068848	9.26691150665283
6	TNFRSF1B	6.3591920697667e-17	6.65402555465698	9.18539905548096
6	FCER1G	7.69227476144837e-17	8.51287937164307	9.15906047821045
6	ANKRD44	3.96646104251616e-16	3.18031072616577	8.97469043731689
6	BTG1	4.65346447879048e-16	0.949783444404602	8.95170402526855
6	FXYD5	1.22900625623171e-15	6.75367641448975	8.83372020721436
6	ARHGAP26	1.38111223717319e-15	3.87749791145325	8.81589889526367
6	CREM	6.59312291131365e-15	2.96265459060669	8.62990760803223
6	GRAP2	1.69362260780762e-14	8.58978843688965	8.5169620513916
6	FAM107B	5.93005325238119e-14	2.28638482093811	8.3621244430542
6	FTL1	2.96608414707449e-13	1.31923198699951	8.1660213470459
6	MT-CO2	3.36045135666423e-13	0.378661602735519	8.14391899108887
6	FYB	3.94919041293896e-13	5.26682281494141	8.11983776092529
6	STK17B	8.80355138604488e-13	1.53960108757019	8.0183048248291
6	SLC38A1	3.0238962240623e-12	7.31720018386841	7.85469055175781
6	ITK	6.21036576872296e-12	8.76392936706543	7.76059627532959
6	RUNX1	8.04682250871406e-12	2.07327485084534	7.72114181518555
6	AKAP13	9.87913836357686e-12	0.954223036766052	7.69179630279541
6	CYTIP	1.78232026654673e-11	7.97486209869385	7.61284208297729
6	LYN	3.6606952284221e-11	6.10060024261475	7.51321172714233
6	SAMSN1	3.66723280567104e-11	8.70113658905029	7.51003694534302
6	NFKB1	4.32154248653977e-11	0.927067577838898	7.48562908172607
6	GAB2	4.91093855484429e-11	2.71274185180664	7.46231651306152
6	MT-CO1	4.91093855484429e-11	0.326650828123093	7.46050119400024
6	GCH1	5.43903238097466e-11	1.61750280857086	7.44436645507812
6	SH3KBP1	8.06932970746778e-11	2.6198947429657	7.38947582244873
6	DOCK2	8.20968956841121e-11	8.51274394989014	7.38177347183228
6	PLEK	8.20968956841121e-11	8.57863521575928	7.37957572937012
6	PITPNC1	2.8038570872944e-10	1.94512617588043	7.20688533782959
6	ITPKB	3.03686385837346e-10	2.07735204696655	7.1936297416687
6	CD53	4.96754015976195e-10	8.12245559692383	7.12381410598755
6	ELL2	8.85143645975277e-10	1.18635725975037	7.03916072845459
6	SPRR1A	1.25280789592227e-09	1.75095987319946	6.9883074760437
6	FYN	2.32924868130517e-09	3.19446444511414	6.89847946166992
6	MIR142HG	2.48223268799505e-09	9.28802108764648	6.88281393051147
6	PTPN22	2.67990921560177e-09	5.16321229934692	6.86974954605103
6	TYROBP	2.6808316927446e-09	8.40606212615967	6.86758661270142
6	CTLA2A	3.35652331697865e-09	7.76611566543579	6.83334493637085

## Sheet: KC_fresh_leiden_2_030_DEG_bySco
Cluster	Gene	P_adj	Log2FC	Scores
1	SBSN	0	5.14284515380859	68.4977722167969
1	LY6G6C	0	4.90025949478149	66.4792785644531
1	HAL	0	5.25903701782227	65.7551498413086
1	PRDX5	0	2.76246118545532	64.9391632080078
1	ELOVL4	0	3.75205230712891	64.8423156738281
1	GM94	0	4.73303699493408	64.2497329711914
1	FAM25C	0	2.81384086608887	64.1069107055664
1	PSAPL1	0	4.49895143508911	63.2284049987793
1	CALM4	0	4.06987047195435	63.1545944213867
1	ORM1	0	4.76426649093628	62.7364921569824
1	CST6	0	3.9455554485321	62.7021522521973
1	SLURP2	0	4.42814826965332	61.7597999572754
1	GLTP	0	2.62490844726562	61.4388694763184
1	DMKN	0	2.56763458251953	61.4277763366699
1	PLXDC2	0	3.27728891372681	61.3899002075195
1	SPINK5	0	4.90377426147461	61.3620147705078
1	KRT10	0	4.45910549163818	61.3429908752441
1	POF1B	0	2.70643353462219	61.3077659606934
1	KRTDAP	0	3.88425612449646	61.2917747497559
1	PDZK1IP1	0	3.37334513664246	61.2322654724121
1	AGPAT4	0	4.34518194198608	61.1505699157715
1	MAP2	0	3.85386562347412	60.943416595459
1	DGAT2	0	3.67505955696106	60.3791961669922
1	DSC1	0	4.55060386657715	60.3412246704102
1	NECTIN4	0	3.35976004600525	59.8333969116211
1	CLIC3	0	3.57035565376282	59.628360748291
1	PLA2G2F	0	3.53107094764709	59.4226760864258
1	2310050C09RIK	0	5.17827129364014	59.1871299743652
1	DSG1A	0	2.58732914924622	58.9069328308105
1	DKKL1	0	6.32713270187378	58.8075485229492
1	CALML3	0	4.65486288070679	58.7469100952148
1	SKINT5	0	4.10298538208008	58.6533355712891
1	PRXL2B	0	3.1980094909668	58.2027397155762
1	ELOVL1	0	2.96801948547363	58.0665702819824
1	ABLIM1	0	2.8867883682251	58.0604858398438
1	MBOAT2	0	6.65540742874146	58.0228385925293
1	PTGS1	0	3.1719536781311	57.9503364562988
1	HEBP2	0	3.08236241340637	57.9381942749023
1	HOMER2	0	3.30342245101929	57.6595878601074
1	SUSD2	0	3.96107530593872	56.817943572998
1	NUPR1	0	3.37246990203857	56.6110610961914
1	SKINT3	0	3.78420329093933	56.284782409668
1	DYNLL1	0	1.65963888168335	56.162784576416
1	KCTD12	0	4.27907705307007	56.0545539855957
1	SKINT9	0	3.72244930267334	55.9164886474609
1	DNASE1L3	0	4.17908573150635	55.8708763122559
1	SKINT6	0	3.41458082199097	55.8669548034668
1	CTNNBIP1	0	3.55524039268494	55.7435722351074
1	PMVK	0	2.89309000968933	55.4856719970703
1	LGALSL	0	3.30967855453491	55.459098815918
2	GK	0	2.83977866172791	92.2117919921875
2	SERPINB2	0	3.13372921943665	90.6459197998047
2	ABCA12	0	2.80665946006775	88.1558227539062
2	CCDC71L	0	3.22324347496033	87.6439361572266
2	PLET1	0	3.0148720741272	86.5348510742188
2	LYPD3	0	2.47360134124756	86.4210433959961
2	IRF6	0	2.02338767051697	83.552490234375
2	EHF	0	2.06490063667297	83.3060455322266
2	IFI202B	0	3.09702610969543	82.6330108642578
2	CLDN1	0	2.13493847846985	79.894416809082
2	SLC22A23	0	2.23495721817017	79.4837646484375
2	PPIF	0	3.02683329582214	78.1875457763672
2	TACSTD2	0	1.66053950786591	78.1199264526367
2	MAP7D1	0	2.20689392089844	77.6196670532227
2	KRT16	0	3.61087846755981	77.3813705444336
2	SLC6A14	0	3.2691056728363	77.3766860961914
2	RBMS1	0	1.561190366745	76.5532379150391
2	ACTG1	0	1.15266537666321	74.4720306396484
2	UGCG	0	2.12494492530823	74.197151184082
2	RAP2B	0	2.1268470287323	73.8641967773438
2	SFN	0	1.13245522975922	73.5143127441406
2	CSTB	0	1.52348792552948	72.9045333862305
2	FAM135A	0	1.66290402412415	72.7065963745117
2	ZDHHC21	0	1.93754875659943	72.4227752685547
2	EGFR	0	1.72683703899384	72.3365707397461
2	CD44	0	1.64007472991943	69.5929336547852
2	TJP2	0	1.62212717533112	68.4610137939453
2	NIPAL1	0	2.11055970191956	68.4576416015625
2	MPZL3	0	2.02165079116821	68.4426193237305
2	SGMS1	0	1.54295039176941	67.8901977539062
2	TMCC3	0	1.92679762840271	67.6436157226562
2	MAST4	0	1.59497475624084	67.589958190918
2	CLDN4	0	2.71112871170044	67.1432266235352
2	TSPAN5	0	1.57585740089417	67.0791473388672
2	DENND2C	0	1.45859444141388	66.2723922729492
2	ARID5B	0	1.424400806427	65.9450759887695
2	STX11	0	2.21378588676453	65.7630157470703
2	IL1RN	0	2.12707686424255	65.6771087646484
2	ZFP750	0	1.92693996429443	65.1134567260742
2	SMOX	0	1.98106575012207	64.9697189331055
2	FNIP2	0	1.85155582427979	64.4389572143555
2	RAB38	0	1.62947285175323	64.4024963378906
2	KIF13B	0	1.5857241153717	63.9287605285645
2	PRRG4	0	1.81955397129059	63.8438453674316
2	ANKRD22	0	2.04681468009949	63.7472763061523
2	CXCL16	0	1.67252433300018	63.5050811767578
2	SPRR1A	0	3.39060187339783	63.4313049316406
2	GGCT	0	1.7156308889389	62.8972206115723
2	ST14	0	1.83167660236359	62.7810516357422
2	SLC1A1	0	2.3396098613739	62.7079391479492
3	LGALS3	0	1.48666524887085	102.423721313477
3	KRT10	0	3.90108966827393	99.2102432250977
3	MT4	0	3.72156500816345	98.6164855957031
3	CALM4	0	3.27224659919739	98.040885925293
3	KRTDAP	0	3.37499046325684	96.8213119506836
3	DSG1A	0	2.084552526474	96.7548980712891
3	KRT2	0	3.48193001747131	92.1420745849609
3	FAM25C	0	1.82316219806671	91.9383087158203
3	ITM2B	0	0.954509019851685	90.8253021240234
3	PERP	0	1.04060137271881	89.4241790771484
3	PYCARD	0	1.77108716964722	88.3295745849609
3	RAB25	0	1.71236217021942	86.899299621582
3	LY6D	0	1.49939608573914	86.0654144287109
3	DBI	0	1.62250983715057	85.9258499145508
3	ACER1	0	2.42598938941956	83.4546661376953
3	GLTP	0	1.75311124324799	82.025764465332
3	ELOVL4	0	2.27472448348999	78.8728790283203
3	ANXA8	0	0.998146533966064	78.161994934082
3	PRDX5	0	1.41609537601471	77.7674407958984
3	PKP1	0	1.29583072662354	77.6972961425781
3	TMPRSS4	0	2.14500665664673	77.1596221923828
3	SERPINB3B	0	1.99219119548798	76.9760437011719
3	OAS1F	0	1.74709010124207	75.9579696655273
3	DMKN	0	1.57175147533417	75.4190979003906
3	DSC3	0	0.941343307495117	75.0964202880859
3	ENDOU	0	2.30739617347717	74.6573944091797
3	LGALS7	0	0.821405291557312	71.8779067993164
3	CLCA3A2	0	1.65836679935455	71.6730575561523
3	FABP5	0	2.23911499977112	70.8680877685547
3	THEM5	0	1.79422199726105	70.8224945068359
3	ACSL1	0	1.6663144826889	70.7182693481445
3	PLA2G4F	0	2.54476833343506	70.0288162231445
3	RPLP1	0	0.44139701128006	69.3934936523438
3	1810037I17RIK	0	1.35197496414185	69.2382507324219
3	BBOX1	0	1.97291839122772	69.2139282226562
3	RALBP1	0	1.12027406692505	68.5782623291016
3	CAPNS2	0	1.28082609176636	68.1752395629883
3	SPTSSA	0	1.29191911220551	67.1920776367188
3	SERPINB5	0	1.12021541595459	67.0431213378906
3	SBSN	0	1.94502639770508	65.7493515014648
3	SDR16C5	0	1.86947596073151	65.6357345581055
3	ID1	0	1.65881395339966	65.3478546142578
3	JUP	0	0.939501166343689	65.0060043334961
3	SKINT6	0	2.36436009407043	64.6183090209961
3	CLIP4	0	1.73800528049469	64.2174682617188
3	TRIM29	0	0.898610651493073	64.2014389038086
3	DSP	0	0.829346418380737	63.5364799499512
3	RPLP0	0	0.474747896194458	63.353328704834
3	CALM5	0	2.20456123352051	63.0852851867676
3	NPL	0	1.4623407125473	62.1996078491211
4	VIM	6.50857663738204e-130	7.05742931365967	24.6684818267822
4	DCN	9.48002764611835e-69	5.98260545730591	18.0582733154297
4	LGALS1	1.16759571710556e-64	6.31044292449951	17.4911689758301
4	SPARC	1.64306447265995e-61	3.94034886360168	17.0600566864014
4	ZEB2	2.45064918180278e-59	7.39821767807007	16.7543106079102
4	S100A4	1.13027396466817e-58	2.18781208992004	16.653923034668
4	CRIP1	4.45047738262156e-50	2.12700986862183	15.4017038345337
4	ZEB1	1.29579960262888e-46	6.61874580383301	14.8707265853882
4	COL1A2	7.09084687661567e-43	5.06439352035522	14.2769174575806
4	ZBTB20	7.92646349510916e-42	1.59798812866211	14.0967817306519
4	COL1A1	1.1654740107477e-37	6.11941194534302	13.3926076889038
4	BGN	4.35834203202738e-36	5.51849889755249	13.1079225540161
4	TIMP2	1.01172926091347e-35	4.01282691955566	13.0327081680298
4	EBF1	7.48775066619658e-31	7.13398790359497	12.1279592514038
4	GAB2	3.77684169795823e-30	2.67510080337524	11.9889841079712
4	IGFBP4	3.85861479380015e-28	3.75879955291748	11.5862703323364
4	EPB41L2	4.16781942611676e-28	2.29611301422119	11.5772485733032
4	FMNL2	5.48800112052134e-28	2.64801406860352	11.5512752532959
4	APOD	1.22408675240965e-27	6.82948398590088	11.4798269271851
4	FN1	2.82460393039115e-27	3.58513140678406	11.4028396606445
4	EMP3	8.10985657473742e-27	4.33797407150269	11.3043260574341
4	COL3A1	8.1181948170517e-27	5.79380941390991	11.3022174835205
4	FTL1	2.22156603905257e-26	1.09548258781433	11.2114963531494
4	ELMO1	3.25259074688313e-26	2.81761050224304	11.1757555007935
4	LAMA2	1.97928440240701e-25	6.7431058883667	11.0067710876465
4	SRGN	1.27549942423677e-24	6.50088357925415	10.8322458267212
4	AKT3	1.86672379682294e-24	2.45198798179626	10.7956066131592
4	TCF4	7.27487140183185e-24	1.27874374389648	10.6682376861572
4	SQSTM1	8.00283803138042e-24	0.918753564357758	10.6576948165894
4	PRRX1	8.20714385886862e-24	7.33936405181885	10.6537027359009
4	DENND4A	2.05776669958122e-23	1.29117655754089	10.5661916732788
4	RGS2	3.38072081605709e-23	1.89028835296631	10.5179033279419
4	AKAP13	6.26620684439886e-23	0.830225348472595	10.4579982757568
4	TMSB10	7.43213647939956e-23	1.08839106559753	10.4402456283569
4	SLIT3	1.07095071558569e-22	3.10926127433777	10.4039611816406
4	FYN	1.11071274090838e-22	3.00691628456116	10.3989639282227
4	PLPP3	3.04082046552694e-22	1.61170768737793	10.3010330200195
4	FERMT2	6.20132977157838e-22	2.56990885734558	10.2292814254761
4	FSTL1	1.12420624376216e-21	4.29292345046997	10.1700401306152
4	NR4A2	1.57428650355198e-21	1.53821873664856	10.1320695877075
4	FGFR1	1.53302802360189e-20	1.56886398792267	9.89843940734863
4	NFKB1	3.08273223559966e-20	0.750888049602509	9.82447052001953
4	COL6A3	4.81470889781968e-20	7.17317581176758	9.77694416046143
4	RUNX1	8.96577560265709e-20	1.5877777338028	9.71134090423584
4	FXYD5	1.2463123057535e-19	6.49968862533569	9.67531204223633
4	MARCKS	2.43478979703804e-19	1.06575202941895	9.60538387298584
4	CELF2	2.45755147598909e-19	1.26087188720703	9.60324764251709
4	BICC1	2.63803947161586e-19	6.49257802963257	9.59477806091309
4	FAM107B	2.89311354070518e-19	1.79171288013458	9.58410167694092
4	NUPR1	2.94844415657306e-19	1.20521700382233	9.58100414276123
5	KRT5	0	3.47951602935791	112.146987915039
5	KRT14	0	3.63429760932922	109.959548950195
5	CCND2	0	2.29756760597229	95.1723327636719
5	COL17A1	0	1.79683351516724	87.6057586669922
5	FTH1	0	1.35045540332794	86.6797866821289
5	SLC6A6	0	1.83041334152222	84.9540557861328
5	DST	0	1.76990413665771	84.3261489868164
5	SMOC2	0	2.5523419380188	84.1243515014648
5	TGFBI	0	1.55444419384003	83.4364700317383
5	CDH13	0	2.58069777488708	82.1135559082031
5	ANTXR1	0	2.92298674583435	81.3174362182617
5	SOX6	0	1.86669540405273	78.4824447631836
5	ITGA6	0	1.53098714351654	77.7380218505859
5	SLC4A8	0	2.5242133140564	76.7275772094727
5	KRT15	0	2.5657958984375	74.9280776977539
5	FOS	0	1.81638407707214	71.8069610595703
5	TSPO	0	1.45154452323914	70.7722244262695
5	ITGB4	0	1.66726005077362	70.0944671630859
5	S100A6	0	1.98548269271851	70.087516784668
5	FTL1	0	1.68100023269653	69.1070251464844
5	IFITM3	0	1.66459560394287	67.8030548095703
5	APOE	0	0.787355542182922	67.2461471557617
5	WLS	0	1.34100830554962	66.875
5	TNFRSF19	0	1.62571835517883	66.781852722168
5	FGFR2	0	1.13413393497467	65.4891967773438
5	CCND1	0	1.93011224269867	65.3192291259766
5	JAG2	0	2.15884900093079	64.9391403198242
5	FCGBP	0	1.36616468429565	64.0982208251953
5	LAMB3	0	1.74875020980835	63.6737403869629
5	NFIX	0	0.962279498577118	63.4168739318848
5	ATF3	0	1.20742690563202	62.8822250366211
5	POSTN	0	1.60470426082611	61.9532127380371
5	NFIA	0	1.47297334671021	60.2943305969238
5	SLCO2A1	0	2.19741106033325	59.5669975280762
5	1700025G04RIK	0	1.40880274772644	59.5629234313965
5	RBBP8	0	1.50495529174805	59.4834365844727
5	BCAM	0	1.44541895389557	59.3619575500488
5	TXNDC17	0	0.757636964321136	57.873851776123
5	SOCS3	0	1.84400618076324	57.748348236084
5	MT2	0	1.20674908161163	56.8118782043457
5	BHLHE40	0	1.24705708026886	56.7084350585938
5	CRISPLD2	0	2.02618646621704	55.0010986328125
5	TXNIP	0	1.4373664855957	54.9083633422852
5	GPX1	0	0.728069603443146	54.6965866088867
5	NFIC	0	1.36606621742249	54.5632743835449
5	MT1	0	0.998155772686005	54.2231903076172
5	ITGB1	0	1.20388555526733	53.5044174194336
5	JUNB	0	0.885013699531555	53.2119789123535
5	CAPG	0	1.01818561553955	53.0039405822754
5	IL1R2	0	2.85006499290466	52.725154876709
6	PHLDB2	0	3.75167441368103	72.3412399291992
6	ITGA2	0	4.0412220954895	71.1851348876953
6	CDCP1	0	2.38188767433167	71.1574478149414
6	PXDC1	0	3.10620999336243	70.1064834594727
6	CD44	0	2.27493667602539	70.0310287475586
6	ITGB1	0	2.62086963653564	69.7761077880859
6	IFI202B	0	3.64213085174561	68.6228866577148
6	MET	0	2.62822604179382	66.6634826660156
6	TNFRSF12A	0	2.16331458091736	63.4760780334473
6	4930523C07RIK	0	2.48265767097473	63.106746673584
6	SERPINB2	0	2.97007822990417	62.5996551513672
6	LAMC2	0	2.41508889198303	60.8964385986328
6	S100A10	0	1.80146384239197	60.8798751831055
6	PDE4B	0	2.15547919273376	60.2121124267578
6	NEDD4L	0	2.14748764038086	60.1745529174805
6	RAP2B	0	2.3697817325592	59.8875885009766
6	EGFR	0	1.94292140007019	59.6680450439453
6	SSH2	0	2.26529383659363	59.0581436157227
6	ATXN1	0	2.03270101547241	59.0535278320312
6	THBS1	0	2.52132654190063	57.3955841064453
6	ITGB6	0	2.82914090156555	56.2871246337891
6	CLIC4	0	1.99689447879791	55.9687080383301
6	ETS1	0	2.86406588554382	55.3560447692871
6	TPM1	0	2.44110321998596	53.7047653198242
6	ACTB	0	1.07671368122101	53.3463516235352
6	USP47	0	1.69188761711121	53.1722679138184
6	ITGAV	0	1.98588109016418	53.1533737182617
6	IRF6	0	1.73758125305176	52.7797203063965
6	IGFBP3	0	2.3931827545166	52.2962875366211
6	CXCL16	0	1.83407473564148	52.1618843078613
6	PIM1	0	1.69716119766235	51.6964073181152
6	MSN	0	1.97911512851715	51.5521621704102
6	EIF5	0	1.27720820903778	51.4678268432617
6	RBMS1	0	1.39211642742157	51.1345367431641
6	CAST	0	1.22820043563843	50.8870697021484
6	SCHIP1	0	2.22754430770874	50.5894393920898
6	TGIF1	0	1.88977634906769	50.3759765625
6	SEMA5A	0	2.26584267616272	50.3084487915039
6	TACSTD2	0	1.47108805179596	50.2938346862793
6	MAST4	0	1.5734361410141	49.9771842956543
6	MYO1E	0	1.35427832603455	49.9770355224609
6	ERRFI1	0	1.91189575195312	49.9467163085938
6	SLC22A23	0	1.85135233402252	49.6167068481445
6	KLF6	0	1.59458136558533	49.6135902404785
6	PHLDA1	0	2.12942719459534	49.3984260559082
6	ANXA1	0	1.39335858821869	49.3293685913086
6	SEMA3C	0	1.93599116802216	49.2357711791992
6	GADD45A	0	2.43209886550903	48.9898414611816
6	PLET1	0	2.07257008552551	48.7767677307129
6	MAP2K3	0	1.54680109024048	48.7452697753906
7	SOX9	0	3.88614892959595	50.5073699951172
7	GSTM5	0	3.33916258811951	47.2888336181641
7	RBP1	0	6.04862594604492	45.1743240356445
7	ADGRL2	0	2.24797940254211	44.4634819030762
7	DEFB6	0	4.09736442565918	43.1708793640137
7	GAS7	0	4.5707540512085	38.535572052002
7	NEBL	1.26905e-303	4.40381956100464	37.4504356384277
7	KRT17	2.51901719768971e-289	3.47400689125061	36.5594215393066
7	ALDH3A1	6.35896661393199e-277	2.51809525489807	35.7684631347656
7	KRT79	8.84337659805267e-270	7.14328956604004	35.3041687011719
7	SHROOM3	7.25682707820891e-243	2.83509397506714	33.4977416992188
7	SCEL	3.51117714396799e-234	1.72479665279388	32.891658782959
7	REEP5	2.11313827739225e-228	1.04722511768341	32.4823608398438
7	EPCAM	8.79690595668738e-224	1.62017405033112	32.1523361206055
7	ADGRL3	3.20553996053312e-219	3.8264524936676	31.8231201171875
7	BLNK	1.15654543781496e-212	2.71890234947205	31.3432769775391
7	DPYSL3	4.00677237137242e-202	5.83324146270752	30.558910369873
7	TEC	5.64763880566168e-200	2.06160092353821	30.3956451416016
7	DEFB1	1.04188659739724e-199	3.07106685638428	30.3744697570801
7	SKINT3	1.22304130371713e-195	2.75421380996704	30.0627098083496
7	FST	4.75786689205979e-195	2.97305059432983	30.0165729522705
7	EFNB2	9.60037347689552e-186	2.1339156627655	29.292121887207
7	TMSB4X	4.73254108040558e-175	0.847561955451965	28.4392890930176
7	EPHA4	3.86455108070605e-173	1.23304319381714	28.2833595275879
7	AQP3	2.2649442608699e-172	1.15453052520752	28.2191219329834
7	CLDN1	1.07404968956698e-169	1.38146042823792	27.9993572235107
7	IER3	2.8991516897168e-165	1.52332890033722	27.6305809020996
7	CST6	5.48709538032615e-158	3.61162638664246	27.0158348083496
7	CALML3	1.84212116818273e-150	2.62485861778259	26.365255355835
7	KIF26B	8.90115161563493e-149	4.6277961730957	26.2165374755859
7	ENDOD1	8.62458692540434e-147	3.47411775588989	26.0410499572754
7	ATP6V1C2	2.6295563091824e-143	3.12483668327332	25.7308979034424
7	EMB	7.05964399831822e-139	1.58193814754486	25.3306999206543
7	LMO7	3.66586978259886e-136	1.44266259670258	25.081693649292
7	VDR	2.45597311132644e-134	1.33706367015839	24.9130992889404
7	MT-CO1	6.16353376907608e-134	0.32967135310173	24.8749027252197
7	TMEM45A	6.0225210568053e-133	0.896094739437103	24.7826099395752
7	CLIP1	6.89885602669846e-131	0.955603003501892	24.589017868042
7	RUNX1	5.10521553810118e-129	2.12368226051331	24.4118499755859
7	BARX2	1.44163295888892e-128	2.93962860107422	24.3687782287598
7	MYO1D	4.56613948244376e-127	1.29460155963898	24.2256603240967
7	C1QTNF12	3.47455745638974e-122	1.82242071628571	23.7541408538818
7	AHR	5.2143969648295e-122	1.45785009860992	23.7365531921387
7	KALRN	5.44607434117413e-116	3.24765372276306	23.1428318023682
7	PLET1	5.78082743900268e-116	1.55861377716064	23.1397705078125
7	CRIP2	8.3006139309637e-116	0.758744955062866	23.1236782073975
7	MACF1	1.52297351808136e-115	0.81410950422287	23.0969886779785
7	AOPEP	3.63622254662053e-114	0.972889065742493	22.9585189819336
7	EGR2	2.14552173275679e-113	1.63182532787323	22.8807544708252
7	H3F3A	3.3770211868709e-113	0.362609505653381	22.8604965209961
8	MGST1	0	6.52181625366211	42.0631904602051
8	PLIN2	0	8.64722633361816	41.8661460876465
8	AKR1C18	0	8.53748893737793	41.2052268981934
8	SNTB1	0	6.22101974487305	39.0828742980957
8	PTPRK	0	5.41772890090942	39.0088882446289
8	AUTS2	0	4.06053352355957	38.6486663818359
8	VAV3	0	4.08255863189697	38.5003890991211
8	SEMA3E	0	6.38737678527832	38.482006072998
8	GPX4	2.79359037640581e-304	2.84098052978516	37.4977912902832
8	LAMA4	1.41263712881623e-301	8.78690528869629	37.3289566040039
8	ARHGAP24	1.16184614197437e-284	5.81960773468018	36.2689590454102
8	LDHB	1.62056239978801e-283	4.0064172744751	36.1940727233887
8	APOE	4.11643784371241e-265	1.65846168994904	34.9969139099121
8	CLMP	1.73767924314302e-263	8.75817489624023	34.888256072998
8	MOB3B	3.33151743991926e-256	4.59051036834717	34.4015960693359
8	ACSL4	9.07092923178614e-255	3.76371216773987	34.3040733337402
8	EMB	3.42740551426883e-253	3.57704925537109	34.1954689025879
8	TECR	4.42974944008735e-251	2.18024086952209	34.051872253418
8	NCOA7	1.04211630296697e-246	5.11751079559326	33.7540245056152
8	MSRB3	8.51543819022023e-245	5.04610967636108	33.6200675964355
8	PICALM	1.94720118531434e-244	2.69447374343872	33.5944366455078
8	GSTA3	1.22826379626725e-240	6.79523658752441	33.3321914672852
8	BACH2	1.1475694947771e-239	3.85103344917297	33.2632026672363
8	PSPH	1.37182585770479e-238	3.4714572429657	33.1867713928223
8	CAT	1.88293730405382e-235	4.19254636764526	32.9668312072754
8	AVPR1A	4.41593183840754e-230	9.91655826568604	32.5882835388184
8	PAWR	6.91107135064331e-230	2.84872913360596	32.5737533569336
8	IGFBP4	4.06050642037464e-229	5.52209377288818	32.5186195373535
8	PRXL2A	5.19520942157831e-227	3.02137732505798	32.3684616088867
8	KRT79	1.41639115552302e-222	4.74677276611328	32.0487785339355
8	SCD1	5.65627954527458e-221	3.59261989593506	31.9329452514648
8	SLC23A2	1.10032703838785e-220	4.15037059783936	31.9114475250244
8	TENM2	2.50012507382326e-219	3.44656038284302	31.812858581543
8	NAV3	1.25451192503615e-218	4.52861452102661	31.7615165710449
8	ACBD6	4.78454720134116e-215	3.11732721328735	31.4998035430908
8	TLN2	8.00362101169086e-214	4.64487218856812	31.4097175598145
8	MT-CYTB	2.52301880365215e-213	0.86738508939743	31.3725719451904
8	FAS	3.54152665461312e-211	3.80650305747986	31.2135524749756
8	ACSBG1	2.01143229053545e-208	2.64430260658264	31.009334564209
8	PDK4	7.73261851963439e-208	7.55088472366333	30.965353012085
8	LRMDA	3.06395581376108e-204	6.59078359603882	30.6958026885986
8	SLIT3	2.48357914229162e-202	5.45152521133423	30.5518856048584
8	OSBPL3	3.42445232634325e-198	2.90568995475769	30.2365055084229
8	SPTLC3	2.06714328876432e-196	3.56210541725159	30.0997161865234
8	KALRN	3.73003164421064e-194	4.70501470565796	29.9263019561768
8	IMMP2L	1.00229517954659e-193	3.27374839782715	29.8927955627441
8	ANXA5	2.58236766292507e-191	1.66377174854279	29.7062187194824
8	COX8A	3.13606321680448e-190	1.31441462039948	29.6216583251953
8	CSRP1	4.6374131296245e-190	2.34437227249146	29.6079845428467
8	IGFBP2	1.92367474382067e-189	4.13928461074829	29.5594787597656
9	HMGB2	0	3.17376351356506	72.4434585571289
9	STMN1	0	4.6828179359436	71.6585998535156
9	H2AFZ	0	2.71490335464478	70.1500091552734
9	MKI67	0	5.33520793914795	70.0253753662109
9	HMGB1	0	2.25693559646606	69.1880416870117
9	CDCA8	0	5.63670301437378	65.7081756591797
9	SMC4	0	3.36777663230896	64.2486877441406
9	H2AFV	0	3.01376724243164	63.905689239502
9	BIRC5	0	6.75587463378906	63.6611633300781
9	TOP2A	0	5.76918935775757	62.7828979492188
9	CCDC34	0	3.71887803077698	61.7588653564453
9	SMC2	0	4.58283185958862	61.5354690551758
9	PTMA	0	1.17472970485687	61.4830665588379
9	ANLN	0	5.51905727386475	61.1069412231445
9	CDCA3	0	6.25222539901733	60.4499092102051
9	CENPA	0	6.12165260314941	58.7993316650391
9	TUBB5	0	3.30693173408508	58.7763977050781
9	SPC24	0	5.57968759536743	57.6865005493164
9	HMGN2	0	3.08809304237366	57.6388626098633
9	UBE2S	0	2.14906001091003	57.466480255127
9	CENPF	0	6.9579439163208	57.4343070983887
9	NUCKS1	0	1.9763970375061	56.1708908081055
9	RACGAP1	0	5.88432884216309	55.8195419311523
9	DIAPH3	0	3.69147753715515	55.4622840881348
9	PCLAF	0	5.76259565353394	55.3544616699219
9	SELENOH	0	2.7523295879364	55.0157699584961
9	DEK	0	2.02977681159973	54.9995765686035
9	PRC1	0	4.16904830932617	54.5858688354492
9	CKS2	0	2.78051948547363	54.3698959350586
9	TPX2	0	5.66135168075562	54.2375755310059
9	HMMR	0	7.10529232025146	54.0379104614258
9	PTN	0	2.71164870262146	53.2886085510254
9	CENPE	0	5.69168138504028	53.232421875
9	HINT1	0	1.44190680980682	53.2124786376953
9	RBM3	0	1.11582446098328	52.6050872802734
9	RRM1	0	3.18612766265869	52.514232635498
9	CCNB2	0	5.95657348632812	52.4660835266113
9	CDK1	0	6.18152570724487	52.2181549072266
9	KNL1	0	6.33063983917236	51.2020225524902
9	RAN	0	1.53924000263214	50.9480018615723
9	ANP32E	0	2.180504322052	50.8406372070312
9	CDC20	0	5.27688026428223	50.703670501709
9	UBE2C	0	6.95175933837891	49.9984550476074
9	KIF23	0	4.8144850730896	49.914665222168
9	CKAP2L	0	4.32701253890991	48.8203544616699
9	CKS1B	0	3.00092840194702	48.5759544372559
9	HIST1H1B	0	5.30318069458008	48.3785018920898
9	PPIA	0	0.824573636054993	48.2527084350586
9	CLIC1	0	1.24484729766846	48.1617279052734
9	ECT2	0	4.77156162261963	48.0869216918945
10	PTPRK	0	5.52111959457397	69.1961517333984
10	FTL1	0	2.78844404220581	64.1343307495117
10	TENM2	0	4.68756771087646	61.1609802246094
10	FOXP1	0	2.5124192237854	60.0970077514648
10	KRT15	0	3.97804737091064	58.9629325866699
10	NFIB	0	2.23441529273987	57.1772041320801
10	ALCAM	0	4.49802923202515	57.1342697143555
10	PTN	0	3.44685816764832	57.0479125976562
10	ENOX1	0	7.43729496002197	56.1373100280762
10	APP	0	1.47461068630219	54.4692420959473
10	TCF12	0	2.32721400260925	54.469051361084
10	AOPEP	0	2.30151557922363	53.291015625
10	SEMA3E	0	5.67682123184204	53.2816925048828
10	GM973	0	5.4048490524292	52.7011299133301
10	RUNX1	0	4.32384252548218	52.5692443847656
10	EMB	0	3.52052164077759	51.2314491271973
10	AUTS2	0	2.88106727600098	51.0779113769531
10	ACTN1	0	4.04123401641846	50.6810188293457
10	CRIP1	0	3.89864420890808	50.5009269714355
10	SOX9	0	3.88810539245605	50.1527214050293
10	FGFR1	0	3.92651009559631	49.5447616577148
10	MACF1	0	1.6834362745285	49.4338073730469
10	S100A6	0	2.424391746521	49.4158172607422
10	ADGRA3	0	5.0105447769165	49.2147369384766
10	LGR5	0	8.34066486358643	48.3526382446289
10	BNC2	0	3.40078520774841	47.9582252502441
10	SH3RF1	0	3.06197452545166	47.1688690185547
10	GOLIM4	0	2.00892782211304	46.5617332458496
10	FST	0	4.49520349502563	46.5023307800293
10	CALD1	0	5.87026977539062	45.9427947998047
10	TRPS1	0	2.76944088935852	45.6473579406738
10	TGM5	0	5.56365156173706	45.6049385070801
10	SETBP1	0	6.13154125213623	45.0938682556152
10	NAALADL2	0	3.17125630378723	44.0041694641113
10	SGCD	0	5.55656480789185	43.5451850891113
10	AFDN	0	1.67810082435608	41.7765998840332
10	LHX2	0	6.66150522232056	41.7089195251465
10	COL17A1	0	1.45895314216614	41.3018264770508
10	CAV1	0	2.87077713012695	40.843334197998
10	ADGRL3	0	4.7819652557373	40.728458404541
10	CPNE8	0	1.86648535728455	40.1043395996094
10	MITF	0	3.954341173172	39.9607200622559
10	CADM1	0	1.83569276332855	39.0479507446289
10	NEDD9	0	3.99306201934814	38.9022750854492
10	CRIM1	0	1.55822956562042	38.6550407409668
10	RAPGEF2	0	2.09090781211853	38.5592651367188
10	TCF7L2	0	2.03484320640564	37.9599609375
10	TPM1	4.69330976708537e-297	2.52891659736633	36.9797782897949
10	SLC6A6	5.29376351044488e-293	1.52004635334015	36.7260322570801
10	NEDD4	2.73097070381582e-292	1.10018360614777	36.6811790466309
Cluster	Gene	P_adj	Log2FC	Scores
Cluster	Gene	P_adj	Log2FC	Scores
Cluster	Gene	P_adj	Log2FC	Scores
Cluster	Gene	P_adj	Log2FC	Scores
Cluster	Gene	P_adj	Log2FC	Scores
Cluster	Gene	P_adj	Log2FC	Scores
Cluster	Gene	P_adj	Log2FC	Scores
Cluster	Gene	P_adj	Log2FC	Scores
Cluster	Gene	P_adj	Log2FC	Scores
Cluster	Gene	P_adj	Log2FC	Scores

## Sheet: KC_fresh_leiden_2_030_DEG_byP
Column1	Column2	Column3	Column4	Column5
Cluster	Gene	P_adj	Log2FC	Scores
0	KRT5	0	3.47951602935791	112.146987915039
0	ZFP36L1	0	0.78494256734848	41.7850456237793
0	NET1	0	0.770910084247589	41.910587310791
0	ZFP36	0	0.878316760063171	41.9184684753418
0	NEDD4	0	0.655671179294586	42.0691833496094
0	THY1	0	1.89073920249939	42.1026649475098
0	NOP53	0	0.57698917388916	42.2393569946289
0	CLASP2	0	1.10743057727814	42.3654479980469
0	NR4A1	0	0.91318154335022	42.7234382629395
0	LAMA3	0	1.09535753726959	42.980297088623
0	SSBP2	0	0.795723855495453	43.5903968811035
0	HMGB1	0	0.552889406681061	43.8639335632324
0	COL7A1	0	1.85904216766357	43.9006500244141
0	TNS1	0	1.63222813606262	44.1584014892578
0	KLF9	0	0.957136631011963	44.2281723022461
0	CYB5R3	0	0.807428538799286	41.5480918884277
0	PKP4	0	0.995441794395447	44.2935752868652
0	EGR1	0	0.918719708919525	44.4552955627441
0	MMP14	0	1.31120824813843	44.480110168457
0	ACKR4	0	2.16297268867493	44.576473236084
0	MAPKBP1	0	1.45661282539368	44.7780914306641
0	SERPINB6A	0	1.00240433216095	45.0675659179688
0	KIF13A	0	1.20563161373138	45.1195335388184
0	GGTA1	0	1.46772336959839	45.3372421264648
0	ASAP1	0	1.05725753307343	45.9872970581055
0	AHCYL2	0	0.970503807067871	46.1433639526367
0	SERPINB7	0	1.64262747764587	46.3580322265625
0	NFIB	0	0.790351092815399	46.4000129699707
0	PLEC	0	0.818938493728638	46.4969253540039
0	TRERF1	0	1.72782218456268	46.7493858337402
0	LY6A	0	1.23381209373474	46.9084510803223
0	TRP63	0	0.963216841220856	44.3306541442871
0	MAF	0	0.824857711791992	41.4440155029297
0	OXCT1	0	0.763656139373779	41.0533905029297
0	CCN1	0	1.47174894809723	40.8691673278809
0	REEP5	0	0.548690557479858	37.8235626220703
0	EHD2	0	1.52004086971283	37.8250350952148
0	FERMT1	0	1.26068425178528	37.8293991088867
0	SVIL	0	1.02119088172913	37.8690452575684
0	FRMD4B	0	0.90232640504837	37.9348983764648
0	OAZ1	0	0.338295042514801	37.944206237793
0	TMSB4X	0	0.609470009803772	37.9968032836914
0	SET	0	0.596310675144196	38.0316429138184
0	CAVIN1	0	1.15864253044128	38.1888427734375
0	AFF1	0	0.804363250732422	38.1977119445801
0	CXCL14	0	1.43574666976929	38.2739486694336
0	TKT	0	0.666119158267975	38.3892822265625
0	COL4A6	0	1.85820496082306	38.3970375061035
0	PLP2	0	0.768747389316559	38.5383186340332
0	GSTM2	0	1.4026437997818	38.5388832092285
Cluster	Gene	P_adj	Log2FC	Scores
1	LGALS3	0	1.48666524887085	102.423721313477
1	DLG2	0	1.07901084423065	44.1991996765137
1	ATP2B4	0	0.854376316070557	43.6980781555176
1	ATP1B3	0	0.66255259513855	43.5250282287598
1	EEF2K	0	1.3228462934494	43.4251136779785
1	RPL9	0	0.28787899017334	43.3160858154297
1	KLF12	0	1.40994238853455	43.1640625
1	GGH	0	0.989892840385437	42.9573020935059
1	IFT20	0	0.910660207271576	42.7996826171875
1	HSPA12A	0	2.06049466133118	42.5197219848633
1	KLC3	0	0.89479660987854	44.367317199707
1	RPS5	0	0.263885885477066	42.4502143859863
1	METTL7A1	0	1.23787009716034	42.0362663269043
1	VAT1	0	1.0212596654892	41.9386520385742
1	NOTCH2	0	1.18061578273773	41.7070541381836
1	RPS19	0	0.24426506459713	41.6186828613281
1	RPL10A	0	0.308287143707275	41.5030250549316
1	RAB3D	0	0.98016631603241	41.4803237915039
1	RPS3	0	0.269647628068924	41.3723983764648
1	ACAP2	0	0.950894057750702	41.249137878418
1	STARD5	0	1.26995480060577	41.1639213562012
1	LIPM	0	1.61313116550446	42.0801620483398
1	ALOX12E	0	1.90051960945129	41.0785751342773
1	KAZALD1	0	1.73571503162384	44.3822937011719
1	DGCR6	0	0.803035140037537	44.6216773986816
1	CTTNBP2	0	1.70367193222046	48.2632789611816
1	NECTIN4	0	1.40640914440155	48.0560569763184
1	H2AFJ	0	0.855911791324615	47.6413230895996
1	ZFP750	0	1.26307106018066	47.5845489501953
1	ESRP1	0	0.800562858581543	47.4189949035645
1	CLIC3	0	1.47625708580017	46.8986434936523
1	PTGS1	0	1.28569436073303	46.8129730224609
1	SGPP1	0	1.2150102853775	46.4891510009766
1	APOC1	0	0.774548649787903	46.4226570129395
1	IL17RC	0	1.10339641571045	44.4322814941406
1	SLC31A2	0	1.1760321855545	46.4104919433594
1	RPS29	0	0.385571271181107	45.4293174743652
1	RPS3A1	0	0.274088710546494	45.3871116638184
1	FOXN3	0	0.8649080991745	45.381664276123
1	GJB5	0	1.43292200565338	45.278923034668
1	MXD4	0	1.03264427185059	45.1918983459473
1	ITGB5	0	1.85083818435669	45.0952262878418
1	GSTA2	0	2.29914093017578	45.0678596496582
1	HMGCS1	0	0.881707549095154	44.8863372802734
1	POU3F1	0	1.13163149356842	44.8030776977539
1	MVK	0	1.45260214805603	46.3885383605957
1	PRDX6	0	0.616728723049164	40.8425254821777
1	NIPAL2	0	0.858309805393219	40.7787742614746
1	GHR	0	1.10322189331055	40.7563209533691
1	GM20627	0	1.99093103408813	38.7416000366211
Cluster	Gene	P_adj	Log2FC	Scores
2	GK	0	2.83977866172791	92.2117919921875
2	SUCO	0	1.02091598510742	44.8434829711914
2	FAM214B	0	1.83476114273071	44.8624687194824
2	SUB1	0	0.85849267244339	44.9413719177246
2	NECTIN2	0	1.20000278949738	45.0275344848633
2	ERBB3	0	1.15921986103058	45.0349922180176
2	PMAIP1	0	1.69142746925354	45.1155776977539
2	ACTR3	0	0.732980012893677	44.6624908447266
2	EZR	0	0.833577573299408	45.3455505371094
2	GARS	0	1.35414361953735	45.504955291748
2	NECTIN1	0	1.01805889606476	45.7030982971191
2	ABTB2	0	1.33362805843353	45.7223129272461
2	TOP1	0	0.780499637126923	45.9004554748535
2	CYP51	0	1.22474205493927	46.0229644775391
2	HS3ST1	0	2.91451406478882	46.1809730529785
2	FAM129B	0	1.03511559963226	45.4697761535645
2	PON2	0	0.918176293373108	46.3454132080078
2	EPHA2	0	1.16310012340546	44.5354804992676
2	KLF6	0	1.01964402198792	44.1844100952148
2	KRT1	0	1.89567112922668	42.7337379455566
2	CEMIP2	0	1.38881254196167	42.8546409606934
2	GCH1	0	1.75543451309204	42.8768005371094
2	LGALS3	0	0.770063757896423	42.9965171813965
2	ITGAV	0	1.0796103477478	43.0675239562988
2	MIR22HG	0	1.39773869514465	43.1193771362305
2	KIFC3	0	2.08102440834045	44.2780075073242
2	STX3	0	1.23096668720245	43.2027435302734
2	RAB25	0	1.00801253318787	43.4536018371582
2	SELENOK	0	0.876765310764313	43.588306427002
2	DNAJB9	0	1.10470795631409	43.7413024902344
2	CERS3	0	1.66917741298676	43.8051719665527
2	2610528A11RIK	0	1.92189145088196	43.8336029052734
2	RCAN1	0	1.23742341995239	43.843376159668
2	1500015A07RIK	0	1.71367585659027	43.2161483764648
2	AQP3	0	1.10128676891327	46.3939476013184
2	AA986860	0	1.60524868965149	46.4175033569336
2	WASL	0	1.15970158576965	46.4717216491699
2	TRIM16	0	1.45180749893188	48.0045623779297
2	MAOA	0	1.47098362445831	48.057300567627
2	CTSC	0	1.77855384349823	48.1422996520996
2	IL1RL2	0	1.32257032394409	48.3692436218262
2	TSC22D2	0	1.15974915027618	48.4694671630859
2	ZSWIM4	0	1.67244601249695	48.5004272460938
2	SLC9A3R1	0	1.63873791694641	47.987419128418
2	MSMO1	0	1.3128023147583	48.5101165771484
2	PERP	0	0.668134033679962	48.7064590454102
2	KRT10	0	2.21532583236694	48.782657623291
2	ACE2	0	1.77528536319733	48.8069114685059
2	RAB11FIP1	0	2.6798312664032	48.8462562561035
2	GRPEL2	0	1.38224732875824	49.0681266784668
Cluster	Gene	P_adj	Log2FC	Scores
3	PHLDB2	0	3.75167441368103	72.3412399291992
3	SUB1	0	1.04154300689697	40.6499710083008
3	FGD6	0	1.6897976398468	40.9766616821289
3	CLDN1	0	1.47696971893311	41.0849571228027
3	FOSL1	0	1.29635810852051	41.2714653015137
3	PLEC	0	1.18073236942291	41.2872314453125
3	LMO7	0	1.84503257274628	41.351978302002
3	BTG1	0	1.12827241420746	41.4281234741211
3	ZHX2	0	2.12485361099243	41.4967498779297
3	COL17A1	0	1.39987564086914	41.6450805664062
3	ADSS	0	1.33077967166901	41.7091407775879
3	STX6	0	1.60183668136597	41.8133506774902
3	PDLIM1	0	1.39640319347382	42.0292167663574
3	PABPC1	0	0.699398159980774	42.1682434082031
3	PLS3	0	1.29250955581665	42.2972869873047
3	ITPKC	0	1.31315171718597	40.638298034668
3	IL15RA	0	2.0156078338623	42.3374290466309
3	GM14636	0	2.25966715812683	42.5756454467773
3	ACTR3	0	0.93844085931778	42.9766502380371
3	TSLP	0	3.32277727127075	42.9995155334473
3	WASL	0	1.4452508687973	43.1416816711426
3	CDK6	0	1.53265941143036	43.2293548583984
3	CCND2	0	1.58542788028717	43.2522583007812
3	S100A6	0	1.9556759595871	43.9359321594238
3	ANXA11	0	1.70854890346527	44.1920700073242
3	TMTC2	0	1.95405447483063	44.3190116882324
3	ZMAT4	0	2.08577418327332	44.3668479919434
3	TGFBR2	0	1.59782695770264	44.4451904296875
3	MARK3	0	1.55919194221497	44.4677619934082
3	NOCT	0	1.75777220726013	44.5879440307617
3	JAK2	0	1.60730028152466	45.0898246765137
3	MYO1D	0	1.50740242004395	42.4477653503418
3	ADAM8	0	2.50451016426086	45.2480239868164
3	ARHGDIB	0	1.3894522190094	40.6369819641113
3	NRG1	0	2.14670658111572	40.4329795837402
3	LRCH3	0	1.27888119220734	37.6935195922852
3	PTK2	0	1.61867070198059	37.7300186157227
3	ZYX	0	2.05526256561279	37.8092002868652
3	CTNNAL1	0	1.68466603755951	37.8624267578125
3	ZDHHC21	0	1.31279730796814	37.9259872436523
3	EPS15	0	1.40496718883514	37.9930992126465
3	RND3	0	1.12460005283356	38.0259666442871
3	PCDH7	0	1.62949335575104	38.0408554077148
3	FCGBP	0	1.29603576660156	38.055419921875
3	FLVCR1	0	1.75039291381836	38.4106369018555
3	FTL1	0	1.45096337795258	38.5023612976074
3	ZFC3H1	0	1.26828253269196	38.6960220336914
3	SMAD3	0	2.10337257385254	38.7725028991699
3	LAMB3	0	1.47599899768829	38.9663162231445
3	CFL1	0	0.923173010349274	40.5734672546387
Cluster	Gene	P_adj	Log2FC	Scores
4	PTPRK	0	5.52111959457397	69.1961517333984
4	SH3RF1	0	3.06197452545166	47.1688690185547
4	GOLIM4	0	2.00892782211304	46.5617332458496
4	FST	0	4.49520349502563	46.5023307800293
4	CALD1	0	5.87026977539062	45.9427947998047
4	TRPS1	0	2.76944088935852	45.6473579406738
4	SETBP1	0	6.13154125213623	45.0938682556152
4	NAALADL2	0	3.17125630378723	44.0041694641113
4	SGCD	0	5.55656480789185	43.5451850891113
4	AFDN	0	1.67810082435608	41.7765998840332
4	BNC2	0	3.40078520774841	47.9582252502441
4	LHX2	0	6.66150522232056	41.7089195251465
4	CAV1	0	2.87077713012695	40.843334197998
4	ADGRL3	0	4.7819652557373	40.728458404541
4	CPNE8	0	1.86648535728455	40.1043395996094
4	MITF	0	3.954341173172	39.9607200622559
4	CADM1	0	1.83569276332855	39.0479507446289
4	NEDD9	0	3.99306201934814	38.9022750854492
4	CRIM1	0	1.55822956562042	38.6550407409668
4	RAPGEF2	0	2.09090781211853	38.5592651367188
4	TCF7L2	0	2.03484320640564	37.9599609375
4	COL17A1	0	1.45895314216614	41.3018264770508
4	LGR5	0	8.34066486358643	48.3526382446289
4	TGM5	0	5.56365156173706	45.6049385070801
4	S100A6	0	2.424391746521	49.4158172607422
4	FTL1	0	2.78844404220581	64.1343307495117
4	TENM2	0	4.68756771087646	61.1609802246094
4	FOXP1	0	2.5124192237854	60.0970077514648
4	ADGRA3	0	5.0105447769165	49.2147369384766
4	NFIB	0	2.23441529273987	57.1772041320801
4	ALCAM	0	4.49802923202515	57.1342697143555
4	PTN	0	3.44685816764832	57.0479125976562
4	ENOX1	0	7.43729496002197	56.1373100280762
4	APP	0	1.47461068630219	54.4692420959473
4	TCF12	0	2.32721400260925	54.469051361084
4	AOPEP	0	2.30151557922363	53.291015625
4	KRT15	0	3.97804737091064	58.9629325866699
4	GM973	0	5.4048490524292	52.7011299133301
4	RUNX1	0	4.32384252548218	52.5692443847656
4	EMB	0	3.52052164077759	51.2314491271973
4	SEMA3E	0	5.67682123184204	53.2816925048828
4	AUTS2	0	2.88106727600098	51.0779113769531
4	ACTN1	0	4.04123401641846	50.6810188293457
4	CRIP1	0	3.89864420890808	50.5009269714355
4	SOX9	0	3.88810539245605	50.1527214050293
4	FGFR1	0	3.92651009559631	49.5447616577148
4	MACF1	0	1.6834362745285	49.4338073730469
4	TPM1	4.69330976708537e-297	2.52891659736633	36.9797782897949
4	SLC6A6	5.29376351044488e-293	1.52004635334015	36.7260322570801
4	NEDD4	2.73097070381582e-292	1.10018360614777	36.6811790466309
Cluster	Gene	P_adj	Log2FC	Scores
5	HMGB2	0	3.17376351356506	72.4434585571289
5	TAGLN2	0	1.46693384647369	41.9130096435547
5	TUBA1B	0	2.36501979827881	42.072925567627
5	DUT	0	3.16597628593445	42.1207542419434
5	KIF15	0	6.17822265625	42.1850090026855
5	RAD21	0	1.86715006828308	42.5087471008301
5	OAZ1	0	0.793183088302612	42.7150688171387
5	DNPH1	0	2.87203621864319	42.8891143798828
5	PBK	0	6.59806251525879	42.9007110595703
5	CBX3	0	2.07371520996094	43.8979415893555
5	TYMS	0	3.25007367134094	44.1504707336426
5	SERPINB6A	0	1.60895013809204	41.8401527404785
5	NCAPD2	0	5.05103206634521	44.3337898254395
5	CDKN3	0	5.94399785995483	44.5239601135254
5	LOCKD	0	5.18213748931885	44.5252494812012
5	ANP32B	0	1.61168718338013	44.662784576416
5	TACC3	0	4.1329174041748	44.7269248962402
5	CKAP2	0	4.19673156738281	44.742546081543
5	CENPP	0	4.23857116699219	45.0553665161133
5	KIF4	0	4.87811803817749	45.0553932189941
5	CCNB1	0	6.33835172653198	45.8671112060547
5	KIF20B	0	5.6816029548645	46.262092590332
5	CENPW	0	3.67816615104675	47.1403007507324
5	CCNA2	0	6.56480836868286	44.3998146057129
5	CENPM	0	4.84973335266113	41.6466903686523
5	LSM5	0	2.03251314163208	41.2795028686523
5	KRT5	0	2.51964664459229	41.0930938720703
5	CYB5R3	0	1.36679375171661	38.1711578369141
5	UHRF1	0	3.92454814910889	38.3209114074707
5	RANBP1	0	1.34164094924927	38.3986015319824
5	KNSTRN	0	4.93964767456055	38.4226875305176
5	HSP90B1	0	1.23407208919525	38.4591598510742
5	LMNA	0	0.924395799636841	38.7333564758301
5	JPT1	0	1.83943569660187	38.8351936340332
5	H3F3B	0	0.769843876361847	38.8990135192871
5	HMGN5	0	1.82664370536804	39.0536651611328
5	GPX4	0	1.39641010761261	39.0838012695312
5	HNRNPA2B1	0	0.908591210842133	39.0930862426758
5	SHCBP1	0	4.74120235443115	39.2909698486328
5	PRDX4	0	2.73928761482239	39.609935760498
5	SNRPD1	0	1.44680297374725	39.9250984191895
5	TXN1	0	1.20417165756226	39.9985084533691
5	SAE1	0	1.66826939582825	40.064281463623
5	ASPM	0	6.80160474777222	40.1982688903809
5	PTMS	0	1.45784938335419	40.4094009399414
5	PMF1	0	2.98382616043091	40.4351844787598
5	SMC6	0	1.67439925670624	40.5750923156738
5	TK1	0	3.8752908706665	40.7234001159668
5	SNRPG	0	1.27356767654419	40.8240432739258
5	DTYMK	0	2.21869802474976	40.8554458618164
Cluster	Gene	P_adj	Log2FC	Scores
6	SOX9	0	3.88614892959595	50.5073699951172
6	GSTM5	0	3.33916258811951	47.2888336181641
6	RBP1	0	6.04862594604492	45.1743240356445
6	ADGRL2	0	2.24797940254211	44.4634819030762
6	DEFB6	0	4.09736442565918	43.1708793640137
6	GAS7	0	4.5707540512085	38.535572052002
6	NEBL	1.2690546231005e-303	4.40381956100464	37.4504356384277
6	KRT17	2.51901719768971e-289	3.47400689125061	36.5594215393066
6	ALDH3A1	6.35896661393199e-277	2.51809525489807	35.7684631347656
6	KRT79	8.84337659805267e-270	7.14328956604004	35.3041687011719
6	SHROOM3	7.25682707820891e-243	2.83509397506714	33.4977416992188
6	SCEL	3.51117714396799e-234	1.72479665279388	32.891658782959
6	REEP5	2.11313827739225e-228	1.04722511768341	32.4823608398438
6	EPCAM	8.79690595668738e-224	1.62017405033112	32.1523361206055
6	ADGRL3	3.20553996053312e-219	3.8264524936676	31.8231201171875
6	BLNK	1.15654543781496e-212	2.71890234947205	31.3432769775391
6	DPYSL3	4.00677237137242e-202	5.83324146270752	30.558910369873
6	TEC	5.64763880566168e-200	2.06160092353821	30.3956451416016
6	DEFB1	1.04188659739724e-199	3.07106685638428	30.3744697570801
6	SKINT3	1.22304130371713e-195	2.75421380996704	30.0627098083496
6	FST	4.75786689205979e-195	2.97305059432983	30.0165729522705
6	EFNB2	9.60037347689552e-186	2.1339156627655	29.292121887207
6	TMSB4X	4.73254108040558e-175	0.847561955451965	28.4392890930176
6	EPHA4	3.86455108070605e-173	1.23304319381714	28.2833595275879
6	AQP3	2.2649442608699e-172	1.15453052520752	28.2191219329834
6	CLDN1	1.07404968956698e-169	1.38146042823792	27.9993572235107
6	IER3	2.8991516897168e-165	1.52332890033722	27.6305809020996
6	CST6	5.48709538032615e-158	3.61162638664246	27.0158348083496
6	CALML3	1.84212116818273e-150	2.62485861778259	26.365255355835
6	KIF26B	8.90115161563493e-149	4.6277961730957	26.2165374755859
6	ENDOD1	8.62458692540434e-147	3.47411775588989	26.0410499572754
6	ATP6V1C2	2.6295563091824e-143	3.12483668327332	25.7308979034424
6	EMB	7.05964399831822e-139	1.58193814754486	25.3306999206543
6	LMO7	3.66586978259886e-136	1.44266259670258	25.081693649292
6	VDR	2.45597311132644e-134	1.33706367015839	24.9130992889404
6	MT-CO1	6.16353376907608e-134	0.32967135310173	24.8749027252197
6	TMEM45A	6.0225210568053e-133	0.896094739437103	24.7826099395752
6	CLIP1	6.89885602669846e-131	0.955603003501892	24.589017868042
6	RUNX1	5.10521553810118e-129	2.12368226051331	24.4118499755859
6	BARX2	1.44163295888892e-128	2.93962860107422	24.3687782287598
6	MYO1D	4.56613948244376e-127	1.29460155963898	24.2256603240967
6	C1QTNF12	3.47455745638974e-122	1.82242071628571	23.7541408538818
6	AHR	5.2143969648295e-122	1.45785009860992	23.7365531921387
6	KALRN	5.44607434117413e-116	3.24765372276306	23.1428318023682
6	PLET1	5.78082743900268e-116	1.55861377716064	23.1397705078125
6	CRIP2	8.3006139309637e-116	0.758744955062866	23.1236782073975
6	MACF1	1.52297351808136e-115	0.81410950422287	23.0969886779785
6	AOPEP	3.63622254662053e-114	0.972889065742493	22.9585189819336
6	EGR2	2.14552173275679e-113	1.63182532787323	22.8807544708252
6	H3F3A	3.3770211868709e-113	0.362609505653381	22.8604965209961
Cluster	Gene	P_adj	Log2FC	Scores
7	SBSN	0	5.14284515380859	68.4977722167969
7	TMEM54	0	2.31219029426575	42.957691192627
7	MPZL3	0	2.0781090259552	42.9428367614746
7	GSN	0	1.39502239227295	42.9380836486816
7	DHCR7	0	2.33752608299255	42.6657409667969
7	SC5D	0	2.36764526367188	42.6576385498047
7	UGCG	0	2.08837175369263	42.6536445617676
7	TUBB4B	0	1.60805594921112	42.6366310119629
7	FDFT1	0	1.96338856220245	42.5732040405273
7	ARHGEF10L	0	2.44095540046692	42.3087196350098
7	ATP6V0A4	0	2.65153574943542	42.2810211181641
7	SCNN1A	0	2.97978806495667	42.2710800170898
7	STARD4	0	2.69273567199707	42.2595977783203
7	CEBPA	0	2.1803412437439	42.2435150146484
7	MVD	0	2.93291068077087	42.2394599914551
7	SPTLC3	0	2.18905735015869	42.1840515136719
7	SERPINB7	0	2.70204019546509	42.1783256530762
7	SGPP1	0	1.89714598655701	42.169506072998
7	RGS20	0	2.71768569946289	41.9322090148926
7	GM20627	0	2.74670791625977	41.9249038696289
7	CHMP5	0	1.67174088954926	41.8419647216797
7	CD24A	0	1.88455426692963	41.769344329834
7	FUCA1	0	1.92240726947784	41.6902847290039
7	NDEL1	0	1.57377827167511	41.6832427978516
7	SDR9C7	0	5.46875619888306	41.6612586975098
7	CLDN4	0	2.61470007896423	41.6592483520508
7	BTG2	0	1.77422606945038	41.5704574584961
7	OSBPL1A	0	2.23619866371155	41.2723541259766
7	MXI1	0	2.23804140090942	41.1036109924316
7	DPP3	0	2.21373105049133	41.0592956542969
7	ABHD12B	0	2.67587494850159	42.9657516479492
7	MVK	0	2.02764797210693	40.9762268066406
7	GJB3	0	2.13802909851074	43.1624755859375
7	EMP2	0	1.496737241745	43.6321411132812
7	MSMO1	0	2.07419967651367	45.6862983703613
7	CASZ1	0	1.77586936950684	45.6289596557617
7	ALOX12E	0	3.10221123695374	45.4407806396484
7	FAAH	0	3.68854141235352	45.3763198852539
7	TRIM29	0	1.21994185447693	45.3762626647949
7	EVPL	0	1.98504900932312	45.297981262207
7	IFT20	0	1.7942590713501	45.2564239501953
7	PLAAT3	0	4.36651563644409	45.2148170471191
7	MALL	0	2.84400391578674	45.1312026977539
7	DBI	0	1.66297090053558	45.0621452331543
7	SMAGP	0	2.52786636352539	45.0028686523438
7	IDI1	0	2.11003375053406	44.9229621887207
7	GRHL1	0	1.78906345367432	44.7092361450195
7	PAIP2	0	1.36386609077454	44.4795570373535
7	BLMH	0	2.14557504653931	44.4045562744141
7	ADGRF4	0	2.25719380378723	44.3777885437012
Cluster	Gene	P_adj	Log2FC	Scores
8	MGST1	0	6.52181625366211	42.0631904602051
8	PLIN2	0	8.64722633361816	41.8661460876465
8	AKR1C18	0	8.53748893737793	41.2052268981934
8	SNTB1	0	6.22101974487305	39.0828742980957
8	PTPRK	0	5.41772890090942	39.0088882446289
8	AUTS2	0	4.06053352355957	38.6486663818359
8	VAV3	0	4.08255863189697	38.5003890991211
8	SEMA3E	0	6.38737678527832	38.482006072998
8	GPX4	2.79359037640581e-304	2.84098052978516	37.4977912902832
8	LAMA4	1.41263712881623e-301	8.78690528869629	37.3289566040039
8	ARHGAP24	1.16184614197437e-284	5.81960773468018	36.2689590454102
8	LDHB	1.62056239978801e-283	4.0064172744751	36.1940727233887
8	APOE	4.11643784371241e-265	1.65846168994904	34.9969139099121
8	CLMP	1.73767924314302e-263	8.75817489624023	34.888256072998
8	MOB3B	3.33151743991926e-256	4.59051036834717	34.4015960693359
8	ACSL4	9.07092923178614e-255	3.76371216773987	34.3040733337402
8	EMB	3.42740551426883e-253	3.57704925537109	34.1954689025879
8	TECR	4.42974944008735e-251	2.18024086952209	34.051872253418
8	NCOA7	1.04211630296697e-246	5.11751079559326	33.7540245056152
8	MSRB3	8.51543819022023e-245	5.04610967636108	33.6200675964355
8	PICALM	1.94720118531434e-244	2.69447374343872	33.5944366455078
8	GSTA3	1.22826379626725e-240	6.79523658752441	33.3321914672852
8	BACH2	1.1475694947771e-239	3.85103344917297	33.2632026672363
8	PSPH	1.37182585770479e-238	3.4714572429657	33.1867713928223
8	CAT	1.88293730405382e-235	4.19254636764526	32.9668312072754
8	AVPR1A	4.41593183840754e-230	9.91655826568604	32.5882835388184
8	PAWR	6.91107135064331e-230	2.84872913360596	32.5737533569336
8	IGFBP4	4.06050642037464e-229	5.52209377288818	32.5186195373535
8	PRXL2A	5.19520942157831e-227	3.02137732505798	32.3684616088867
8	KRT79	1.41639115552302e-222	4.74677276611328	32.0487785339355
8	SCD1	5.65627954527458e-221	3.59261989593506	31.9329452514648
8	SLC23A2	1.10032703838785e-220	4.15037059783936	31.9114475250244
8	TENM2	2.50012507382326e-219	3.44656038284302	31.812858581543
8	NAV3	1.25451192503615e-218	4.52861452102661	31.7615165710449
8	ACBD6	4.78454720134116e-215	3.11732721328735	31.4998035430908
8	TLN2	8.00362101169086e-214	4.64487218856812	31.4097175598145
8	MT-CYTB	2.52301880365215e-213	0.86738508939743	31.3725719451904
8	FAS	3.54152665461312e-211	3.80650305747986	31.2135524749756
8	ACSBG1	2.01143229053545e-208	2.64430260658264	31.009334564209
8	PDK4	7.73261851963439e-208	7.55088472366333	30.965353012085
8	LRMDA	3.06395581376108e-204	6.59078359603882	30.6958026885986
8	SLIT3	2.48357914229162e-202	5.45152521133423	30.5518856048584
8	OSBPL3	3.42445232634325e-198	2.90568995475769	30.2365055084229
8	SPTLC3	2.06714328876432e-196	3.56210541725159	30.0997161865234
8	KALRN	3.73003164421064e-194	4.70501470565796	29.9263019561768
8	IMMP2L	1.00229517954659e-193	3.27374839782715	29.8927955627441
8	ANXA5	2.58236766292507e-191	1.66377174854279	29.7062187194824
8	COX8A	3.13606321680448e-190	1.31441462039948	29.6216583251953
8	CSRP1	4.6374131296245e-190	2.34437227249146	29.6079845428467
8	IGFBP2	1.92367474382067e-189	4.13928461074829	29.5594787597656
Cluster	Gene	P_adj	Log2FC	Scores
9	VIM	6.50857663738204e-130	7.05742931365967	24.6684818267822
9	DCN	9.48002764611835e-69	5.98260545730591	18.0582733154297
9	LGALS1	1.16759571710556e-64	6.31044292449951	17.4911689758301
9	SPARC	1.64306447265995e-61	3.94034886360168	17.0600566864014
9	ZEB2	2.45064918180278e-59	7.39821767807007	16.7543106079102
9	S100A4	1.13027396466817e-58	2.18781208992004	16.653923034668
9	CRIP1	4.45047738262156e-50	2.12700986862183	15.4017038345337
9	ZEB1	1.29579960262888e-46	6.61874580383301	14.8707265853882
9	COL1A2	7.09084687661567e-43	5.06439352035522	14.2769174575806
9	ZBTB20	7.92646349510916e-42	1.59798812866211	14.0967817306519
9	COL1A1	1.1654740107477e-37	6.11941194534302	13.3926076889038
9	BGN	4.35834203202738e-36	5.51849889755249	13.1079225540161
9	TIMP2	1.01172926091347e-35	4.01282691955566	13.0327081680298
9	EBF1	7.48775066619658e-31	7.13398790359497	12.1279592514038
9	GAB2	3.77684169795823e-30	2.67510080337524	11.9889841079712
9	IGFBP4	3.85861479380015e-28	3.75879955291748	11.5862703323364
9	EPB41L2	4.16781942611676e-28	2.29611301422119	11.5772485733032
9	FMNL2	5.48800112052134e-28	2.64801406860352	11.5512752532959
9	APOD	1.22408675240965e-27	6.82948398590088	11.4798269271851
9	FN1	2.82460393039115e-27	3.58513140678406	11.4028396606445
9	EMP3	8.10985657473742e-27	4.33797407150269	11.3043260574341
9	COL3A1	8.1181948170517e-27	5.79380941390991	11.3022174835205
9	FTL1	2.22156603905257e-26	1.09548258781433	11.2114963531494
9	ELMO1	3.25259074688313e-26	2.81761050224304	11.1757555007935
9	LAMA2	1.97928440240701e-25	6.7431058883667	11.0067710876465
9	SRGN	1.27549942423677e-24	6.50088357925415	10.8322458267212
9	AKT3	1.86672379682294e-24	2.45198798179626	10.7956066131592
9	TCF4	7.27487140183185e-24	1.27874374389648	10.6682376861572
9	SQSTM1	8.00283803138042e-24	0.918753564357758	10.6576948165894
9	PRRX1	8.20714385886862e-24	7.33936405181885	10.6537027359009
9	DENND4A	2.05776669958122e-23	1.29117655754089	10.5661916732788
9	RGS2	3.38072081605709e-23	1.89028835296631	10.5179033279419
9	AKAP13	6.26620684439886e-23	0.830225348472595	10.4579982757568
9	TMSB10	7.43213647939956e-23	1.08839106559753	10.4402456283569
9	SLIT3	1.07095071558569e-22	3.10926127433777	10.4039611816406
9	FYN	1.11071274090838e-22	3.00691628456116	10.3989639282227
9	PLPP3	3.04082046552694e-22	1.61170768737793	10.3010330200195
9	FERMT2	6.20132977157838e-22	2.56990885734558	10.2292814254761
9	FSTL1	1.12420624376216e-21	4.29292345046997	10.1700401306152
9	NR4A2	1.57428650355198e-21	1.53821873664856	10.1320695877075
9	FGFR1	1.53302802360189e-20	1.56886398792267	9.89843940734863
9	NFKB1	3.08273223559966e-20	0.750888049602509	9.82447052001953
9	COL6A3	4.81470889781968e-20	7.17317581176758	9.77694416046143
9	RUNX1	8.96577560265709e-20	1.5877777338028	9.71134090423584
9	FXYD5	1.2463123057535e-19	6.49968862533569	9.67531204223633
9	MARCKS	2.43478979703804e-19	1.06575202941895	9.60538387298584
9	CELF2	2.45755147598909e-19	1.26087188720703	9.60324764251709
9	BICC1	2.63803947161586e-19	6.49257802963257	9.59477806091309
9	FAM107B	2.89311354070518e-19	1.79171288013458	9.58410167694092
9	NUPR1	2.94844415657306e-19	1.20521700382233	9.58100414276123

## Sheet: KC_fresh_leiden_2_030_DEG_byFC
Column1	Column2	Column3	Column4	Column5
Cluster	Gene	P_adj	Log2FC	Scores
0	KRT14	0	3.63429760932922	109.959548950195
0	KRT5	0	3.47951602935791	112.146987915039
0	5830418P13RIK	0.181237495606266	3.35771632194519	1.91378581523895
0	RSPO3	1.18376747393549e-91	3.16116404533386	20.4564628601074
0	CCDC27	3.0850892886867e-41	3.12511110305786	13.6328268051147
0	IIGP1	0.763381443813474	3.1232922077179	1.09356009960175
0	WNT3A	1.9138864110105e-37	3.01057481765747	12.9756193161011
0	FGF12	0.00100735048786912	2.97370719909668	3.67854070663452
0	GM10782	0.365680329608002	2.96052074432373	1.55595362186432
0	TSPEAR	1.03567067699892e-63	2.95578002929688	17.0166893005371
0	ARSI	0.000111955142561597	2.93027186393738	4.22122859954834
0	ANTXR1	0	2.92298674583435	81.3174362182617
0	IL1R2	0	2.85006499290466	52.725154876709
0	CYSLTR1	2.19403323363242e-259	2.79826688766479	34.5243606567383
0	GM48843	0.00114097035982289	2.73456597328186	3.64522480964661
0	GM28286	0.277605820655188	2.71473455429077	1.70385241508484
0	GM5127	9.66015473294141e-75	2.7144820690155	18.4513072967529
0	SLC6A2	6.40149725654753e-101	2.68054628372192	21.4756107330322
0	NPY1R	0.66410501898575	2.63456583023071	1.19145178794861
0	4930474M22RIK	0.213226295401171	2.62145447731018	1.83642852306366
0	CDH13	0	2.58069777488708	82.1135559082031
0	KRT15	0	2.5657958984375	74.9280776977539
0	SMOC2	0	2.5523419380188	84.1243515014648
0	SLC4A8	0	2.5242133140564	76.7275772094727
0	GM48893	0.172318094918752	2.51055669784546	1.93808686733246
0	THSD4	0	2.49003553390503	38.8598022460938
0	DLK2	8.41118809689674e-234	2.48782753944397	32.7713737487793
0	GM16894	0.00393125920108299	2.48373866081238	3.29951453208923
0	GPHA2	9.67357196014033e-272	2.44775223731995	35.3395347595215
0	ECI3	0.0040645781403281	2.4392306804657	3.28965187072754
0	NRG2	1.11238529537799e-08	2.41890168190002	5.99993991851807
0	NGFR	2.820406572416e-88	2.40805602073669	20.071870803833
0	THBS2	1.93151722394043e-39	2.39151883125305	13.3255643844604
0	SLC2A5	6.3380867907467e-183	2.35126399993896	28.9718494415283
0	TNXB	7.03746593964372e-66	2.32554602622986	17.3080387115479
0	COL23A1	6.48754051043063e-173	2.3193199634552	28.1636409759521
0	MS4A10	9.90285047988542e-09	2.31553316116333	6.01928234100342
0	ADCY2	0.120792263347477	2.30208420753479	2.09753704071045
0	CCND2	0	2.29756760597229	95.1723327636719
0	GNA14	0	2.29447937011719	47.1288146972656
0	ADAMTS14	6.30023147755383e-116	2.2904040813446	23.030855178833
0	PITPNM3	2.13156853850875e-19	2.28586840629578	9.23117160797119
0	FIBIN	0.207006926067384	2.26740026473999	1.85116648674011
0	ACKR3	2.63895185398153e-156	2.23684978485107	26.7693862915039
0	GPR146	8.12758678887113e-10	2.22015070915222	6.41851043701172
0	MAN1C1	2.83448224603927e-169	2.21070861816406	27.8641471862793
0	ARHGAP25	5.96244353632959e-18	2.20216631889343	8.8630313873291
0	PLS1	2.20805105221572e-75	2.19762206077576	18.5315170288086
0	SLCO2A1	0	2.19741106033325	59.5669975280762
0	A830008E24RIK	3.27454733832737e-57	2.17716431617737	16.1109180450439
Cluster	Gene	P_adj	Log2FC	Scores
1	KRT10	0	3.90108966827393	99.2102432250977
1	MT4	0	3.72156500816345	98.6164855957031
1	KRT2	0	3.48193001747131	92.1420745849609
1	KRTDAP	0	3.37499046325684	96.8213119506836
1	NHLH1	0.802921400020564	3.35948586463928	1.04002690315247
1	CALM4	0	3.27224659919739	98.040885925293
1	CREG2	0.586274255640387	3.24951314926147	1.26332974433899
1	ANKDD1A	2.00229459354213e-05	2.76639294624329	4.60957145690918
1	CACNG4	9.71810229730905e-12	2.74133729934692	7.08432340621948
1	ASB17	0.80322533206261	2.63785219192505	1.03972196578979
1	ANO7	1.73883866789289e-25	2.61749887466431	10.6550378799438
1	PLA2G4F	0	2.54476833343506	70.0288162231445
1	GM5724	1.93906369811946e-11	2.46227335929871	6.98635053634644
1	ACER1	0	2.42598938941956	83.4546661376953
1	FBP2	0.0814135343614327	2.42335033416748	2.26432919502258
1	GM47071	5.24709687021479e-275	2.40700888633728	35.5550003051758
1	GM42456	0.352173114670603	2.40700435638428	1.57226157188416
1	ADD2	9.18436528680017e-05	2.39545512199402	4.27191638946533
1	SKINT9	0	2.36706018447876	50.2648010253906
1	SKINT6	0	2.36436009407043	64.6183090209961
1	SMIM5	0	2.36070609092712	55.4412155151367
1	BCO1	4.30932478789224e-05	2.35739183425903	4.44256210327148
1	FOXN1	8.12823353900226e-108	2.34021186828613	22.2090263366699
1	ENDOU	0	2.30739617347717	74.6573944091797
1	GSTA2	0	2.29914093017578	45.0678596496582
1	ELOVL4	0	2.27472448348999	78.8728790283203
1	LRRC32	0.000110845215355709	2.24680709838867	4.22778844833374
1	FABP5	0	2.23911499977112	70.8680877685547
1	KCNJ16	1.697946220213e-08	2.23024201393127	5.94110202789307
1	GM31143	0.071704732067133	2.2144238948822	2.3157787322998
1	CALM5	0	2.20456123352051	63.0852851867676
1	C130079G13RIK	2.54239901917563e-87	2.19043016433716	19.967357635498
1	HEMGN	0.00856551585338665	2.18848013877869	3.06570148468018
1	AI463170	0.429723507837634	2.17674708366394	1.45888888835907
1	HRH2	0.0522320089846403	2.16839075088501	2.43909978866577
1	TMPRSS4	0	2.14500665664673	77.1596221923828
1	ACHE	2.76878274131009e-48	2.1247079372406	14.7886266708374
1	GUCY1A1	0.0779964969268908	2.10910081863403	2.2817075252533
1	SULT2A3	1.86880079912341e-09	2.10201692581177	6.29980945587158
1	LY6G6E	0	2.08767604827881	51.3943367004395
1	DSG1A	0	2.084552526474	96.7548980712891
1	BCL2L14	1.87530676256662e-33	2.07980585098267	12.2580347061157
1	4833423E24RIK	0	2.07574367523193	54.8712425231934
1	HSPA12A	0	2.06049466133118	42.5197219848633
1	SKINT5	0	2.04215216636658	52.9718818664551
1	GADL1	0	2.01634526252747	39.5790061950684
1	SERPINB3C	0.261883938455081	2.00753021240234	1.73075449466705
1	CYP17A1	1.32524489491107e-06	2.00406217575073	5.15990352630615
1	AADACL2	1.18793794900777e-36	1.99948191642761	12.8460578918457
1	SERPINB3B	0	1.99219119548798	76.9760437011719
Cluster	Gene	P_adj	Log2FC	Scores
2	KRTAP3-2	1.27198486822249e-19	4.1255145072937	9.2911491394043
2	ANG2	0.0200329599449999	3.64786529541016	2.78476715087891
2	KRT16	0	3.61087846755981	77.3813705444336
2	SPRR2F	7.86583364699285e-35	3.57529902458191	12.5066471099854
2	SPRR2H	2.06209230628919e-108	3.48779082298279	22.2672233581543
2	SPRR1B	0	3.44318103790283	56.9136734008789
2	ATP13A4	4.45511784723734e-151	3.44193077087402	26.3171424865723
2	SPRR2K	5.84432522322415e-07	3.41192579269409	5.30881118774414
2	SPRR1A	0	3.39060187339783	63.4313049316406
2	SEMA7A	8.32739602295118e-13	3.28325343132019	7.41304874420166
2	SLC6A14	0	3.2691056728363	77.3766860961914
2	ADAP2	0.760573162710541	3.26883149147034	1.0846027135849
2	CCDC71L	0	3.22324347496033	87.6439361572266
2	LIPN	8.7713622828527e-13	3.15883874893188	7.4060640335083
2	UOX	0.22800187001078	3.14522743225098	1.79721784591675
2	SERPINB2	0	3.13372921943665	90.6459197998047
2	SPRR2J-PS	6.4124204610339e-05	3.12381601333618	4.34812355041504
2	IFI202B	0	3.09702610969543	82.6330108642578
2	LCE3D	0.001439006502202	3.09031581878662	3.58125853538513
2	PPIF	0	3.02683329582214	78.1875457763672
2	PLET1	0	3.0148720741272	86.5348510742188
2	SLFN2	1.25270689896736e-27	3.01100063323975	11.1001167297363
2	HALR1	0.4044477413724	2.94520592689514	1.4911698102951
2	PRDM1	0	2.93971538543701	58.6828346252441
2	HS3ST1	0	2.91451406478882	46.1809730529785
2	4930513D17RIK	0.0116565629119322	2.88792777061462	2.96336579322815
2	CSTA3	0.00331359099804796	2.8750205039978	3.34763431549072
2	CD274	0	2.84512662887573	51.1218070983887
2	GK	0	2.83977866172791	92.2117919921875
2	VMN2R90	0.0914994939829946	2.82718825340271	2.21247339248657
2	ABCA12	0	2.80665946006775	88.1558227539062
2	TMIGD1	7.41095093114612e-40	2.797776222229	13.4025087356567
2	LCE3C	3.31207837140258e-05	2.77264666557312	4.49518728256226
2	ADGRF2	0	2.76271200180054	57.7721977233887
2	CLDN4	0	2.71112871170044	67.1432266235352
2	RAB11FIP1	0	2.6798312664032	48.8462562561035
2	GM35028	0.0378987255189877	2.66390633583069	2.55836510658264
2	GM45267	0.0992443555588091	2.65228843688965	2.17829060554504
2	2310046K23RIK	0	2.63987398147583	51.2218475341797
2	SPRR2E	2.26840444248952e-12	2.62875843048096	7.27705812454224
2	NT5C1A	0.00677627655663164	2.61764097213745	3.13505482673645
2	GM19557	6.18215568822595e-05	2.59941983222961	4.35646915435791
2	PROCR	8.71916363583398e-147	2.56438422203064	25.9387435913086
2	CSTDC6	5.80751655801164e-07	2.55906748771667	5.30999755859375
2	SPRR2D	1.62204464413647e-47	2.55328774452209	14.6608619689941
2	GM47118	0.288985683840777	2.5336172580719	1.67561709880829
2	KRT6B	1.23336113856125e-08	2.51522183418274	5.98563718795776
2	GM45812	0.00309618913112008	2.49064826965332	3.36712074279785
2	LYPD3	0	2.47360134124756	86.4210433959961
2	HPGDS	8.51797238223715e-89	2.4670467376709	20.1331691741943
Cluster	Gene	P_adj	Log2FC	Scores
3	ITGA2	0	4.0412220954895	71.1851348876953
3	MMP10	2.60641903987896e-13	4.01815938949585	7.60024213790894
3	MMP13	3.34429407146559e-54	3.90458130836487	15.7030124664307
3	NTS	0.25885762223389	3.87736344337463	1.79755246639252
3	PHLDB2	0	3.75167441368103	72.3412399291992
3	SLAMF9	0.726352509156843	3.71355366706848	1.1929030418396
3	HAS2	4.15927529489332e-291	3.69277453422546	36.6026840209961
3	TNFSF18	1.0778523592879e-54	3.66902828216553	15.7752475738525
3	IFI202B	0	3.64213085174561	68.6228866577148
3	WINCR1	1.77644427364906e-39	3.37969708442688	13.3618326187134
3	TSLP	0	3.32277727127075	42.9995155334473
3	CH25H	4.86654553919038e-88	3.27600264549255	20.0700302124023
3	GM12602	0.00849534343602984	3.23444867134094	3.11271119117737
3	MMP1B	0.00579404564505435	3.19006943702698	3.22968029975891
3	ANXA3	1.31701739499648e-213	3.1805419921875	31.3396911621094
3	MMP12	0.734352019877985	3.14003610610962	1.18531405925751
3	IL2RG	4.70031571099371e-07	3.13300538063049	5.38486957550049
3	IL24	0.08789231962929	3.1216025352478	2.28716516494751
3	PXDC1	0	3.10620999336243	70.1064834594727
3	PTGS2OS	0.157155893365557	3.08345699310303	2.03688383102417
3	OAF	1.03588302856158e-116	3.00077295303345	23.1328582763672
3	GM20744	0.852672376893693	2.97087502479553	1.07578122615814
3	SERPINB2	0	2.97007822990417	62.5996551513672
3	TNIP3	1.00487246496903e-98	2.96773624420166	21.2634296417236
3	GM49890	2.93101384991725e-221	2.95377898216248	31.8976669311523
3	ICAM2	0.156246084102311	2.91790533065796	2.03952050209045
3	PLAUR	1.03970737742555e-301	2.90437865257263	37.2651062011719
3	LSAMP	2.93200864696983e-06	2.89391684532166	5.0365629196167
3	8030451A03RIK	9.03545213754084e-26	2.89001488685608	10.7344102859497
3	MMP3	4.56628129075315e-177	2.88975071907043	28.5227603912354
3	ETS1	0	2.86406588554382	55.3560447692871
3	IL19	0.357427377096084	2.83882117271423	1.62722396850586
3	ITGB6	0	2.82914090156555	56.2871246337891
3	TNC	2.28207429089167e-205	2.76947903633118	30.7273845672607
3	MIR155HG	9.12602797127244e-12	2.75219702720642	7.11697149276733
3	PTGS2	5.91293193040055e-165	2.74050998687744	27.5261783599854
3	KCNN4	0.0169919708929926	2.72729659080505	2.89032626152039
3	FLT1	1.5944632039617e-31	2.72277092933655	11.9072370529175
3	TLL1	4.12848939712666e-187	2.70470857620239	29.3232021331787
3	FOXA1	0.00331338683100153	2.70118045806885	3.39308977127075
3	RASSF8	2.56708437527454e-192	2.64831590652466	29.7305030822754
3	TNFSF4	0.000886669265419023	2.64270162582397	3.75517868995667
3	ST3GAL1	4.66099426131164e-65	2.63180446624756	17.2254390716553
3	MET	0	2.62822604179382	66.6634826660156
3	ITGB1	0	2.62086963653564	69.7761077880859
3	FHL2	9.06786138089e-107	2.55302810668945	22.1189842224121
3	GCNT4	3.93661884801427e-05	2.53034400939941	4.49881982803345
3	KRT14	2.1118504238858e-266	2.52209854125977	35.011043548584
3	THBS1	0	2.52132654190063	57.3955841064453
3	ADAM8	0	2.50451016426086	45.2480239868164
Cluster	Gene	P_adj	Log2FC	Scores
4	GRIK1	1.29493746209393e-89	8.72700500488281	20.2464561462402
4	6330403K07RIK	4.20212737577621e-09	8.57454109191895	6.16600799560547
4	GREM1	2.07273409165307e-58	8.34739398956299	16.3008937835693
4	LGR5	0	8.34066486358643	48.3526382446289
4	CHAT	0.0466929160596519	8.1200475692749	2.47929430007935
4	SLC38A4	1.10660894374495e-83	7.95957279205322	19.5580368041992
4	SHISA2	5.24853748102371e-136	7.94974279403687	24.9833755493164
4	GM40663	0.000232192488261522	7.92809152603149	4.04853105545044
4	COL8A2	5.0696218756212e-88	7.78168249130249	20.0636367797852
4	HMGA2	2.18835126033875e-82	7.77591609954834	19.4044437408447
4	GRP	0.0201011656674195	7.76053428649902	2.78249335289001
4	TAFA1	2.53418942301925e-19	7.66851949691772	9.22472095489502
4	SLC22A22	1.64015638917093e-09	7.64310884475708	6.31650590896606
4	SORCS3	0.00227724998135492	7.63889408111572	3.45549321174622
4	JPH4	0.361444106573624	7.57148790359497	1.55989217758179
4	GM6994	0.00173749884285235	7.5277681350708	3.53060221672058
4	SLC9A2	0.000562125915645578	7.50286817550659	3.82966136932373
4	HS3ST4	1.42010106019756e-05	7.44274997711182	4.6781439781189
4	ENOX1	0	7.43729496002197	56.1373100280762
4	WFDC3	7.46483538265863e-80	7.41613101959229	19.1008529663086
4	TNFRSF11B	3.25281398463498e-107	7.40480136871338	22.1643543243408
4	CDH11	7.91208701778726e-267	7.33750677108765	35.042179107666
4	GRM8	1.0275439602714e-12	7.29533195495605	7.38970994949341
4	GM49003	0.00986527979374953	7.27655076980591	3.01727318763733
4	SCRG1	7.43262707826294e-06	7.27406644821167	4.8127384185791
4	PEG3	5.0259216213436e-71	7.27394866943359	18.0005760192871
4	GM41271	0.360120305993122	7.22366046905518	1.56211876869202
4	EPB42	0.700042076483622	7.21947526931763	1.14926075935364
4	1700016K19RIK	0.488811259573624	7.20252466201782	1.38413774967194
4	CD34	4.0117513390937e-136	7.06294918060303	24.9941940307617
4	GFRA2	5.79944628324509e-07	7.03062915802002	5.31216239929199
4	ROR2	3.49212704029548e-66	6.8942699432373	17.3675308227539
4	SLC14A1	4.91924288403971e-11	6.85399913787842	6.84733438491821
4	FUT9	0.103927660063974	6.83876705169678	2.1594443321228
4	PCP4	2.36265351390071e-05	6.81257390975952	4.57011413574219
4	ATP6V1B1	2.71705110224464e-13	6.80904626846313	7.56704950332642
4	A930009A15RIK	0.577806723952206	6.73958873748779	1.27675700187683
4	KRT35	0.885816707004863	6.68869495391846	0.97337943315506
4	ADCY1	1.4444406215925e-08	6.68707418441772	5.96288156509399
4	LHX2	0	6.66150522232056	41.7089195251465
4	SLC2A13	6.18017912870829e-55	6.64620971679688	15.8006954193115
4	4930588K23RIK	0.251836244736004	6.61352348327637	1.75113260746002
4	SCTR	2.94277778878605e-09	6.55694103240967	6.22348022460938
4	LMCD1	1.90775136648244e-26	6.54734373092651	10.8625421524048
4	GPC6	1.44494257871639e-276	6.49471521377563	35.6784362792969
4	ADAMTSL1	1.50694705685962e-190	6.4893946647644	29.5962905883789
4	BMPER	2.69753310851975e-24	6.43571758270264	10.3953590393066
4	NKAIN3	4.57678701757785e-18	6.41952419281006	8.90403366088867
4	SYNPO2	8.15366971320758e-134	6.32532930374146	24.7801094055176
4	KIRREL	2.73741885901864e-66	6.30533599853516	17.3815975189209
Cluster	Gene	P_adj	Log2FC	Scores
5	PIMREG	2.73267298464614e-107	7.27755069732666	22.1849822998047
5	HIST1H2AF	1.05261464677463e-54	7.12416124343872	15.7863836288452
5	HMMR	0	7.10529232025146	54.0379104614258
5	PLK1	5.52371462245144e-149	7.0107045173645	26.1688480377197
5	CENPF	0	6.9579439163208	57.4343070983887
5	UBE2C	0	6.95175933837891	49.9984550476074
5	MXD3	2.63944284758806e-163	6.93702507019043	27.4030227661133
5	AURKB	9.42847553638703e-277	6.86765146255493	35.6977157592773
5	KIF2C	3.40474195271364e-150	6.84058094024658	26.2757167816162
5	ASPM	0	6.80160474777222	40.1982688903809
5	BIRC5	0	6.75587463378906	63.6611633300781
5	XKR5	0.00900165373554465	6.7458176612854	3.08698606491089
5	ESCO2	5.4332695512636e-284	6.68415355682373	36.1617431640625
5	DEPDC1A	3.66011921349001e-176	6.67439651489258	28.4642028808594
5	PBK	0	6.59806251525879	42.9007110595703
5	CCNA2	0	6.56480836868286	44.3998146057129
5	HIST1H3B	6.41143996188176e-12	6.5075740814209	7.1686110496521
5	NUF2	8.95973568746523e-182	6.48604202270508	28.9155788421631
5	CDC25C	8.9659913412724e-134	6.44066667556763	24.7888717651367
5	BUB1	7.80922212635251e-233	6.43214750289917	32.7356033325195
5	KIF18B	1.09621792631448e-46	6.39105987548828	14.5644521713257
5	HIST1H2AH	0.434953315177966	6.37573623657227	1.50720822811127
5	HIST1H3C	6.55927479562245e-184	6.35718297958374	29.0852203369141
5	SPC25	3.17291345195039e-221	6.35431289672852	31.9074821472168
5	SAPCD2	4.56264967984769e-103	6.3495078086853	21.7404041290283
5	KIF14	1.38179688493106e-103	6.34072160720825	21.7953395843506
5	CCNB1	0	6.33835172653198	45.8671112060547
5	KNL1	0	6.33063983917236	51.2020225524902
5	PIF1	6.94989576425826e-25	6.29382133483887	10.5515565872192
5	HIST1H2BN	5.08246343782396e-20	6.29149293899536	9.42520332336426
5	CDCA3	0	6.25222539901733	60.4499092102051
5	TROAP	2.08543127191285e-54	6.20212411880493	15.7426958084106
5	SKA1	4.07724263727762e-118	6.19375944137573	23.2843856811523
5	IQGAP3	1.75849754391483e-132	6.18794631958008	24.6683864593506
5	NUSAP1	0	6.18440532684326	47.6818008422852
5	CDK1	0	6.18152570724487	52.2181549072266
5	KIF15	0	6.17822265625	42.1850090026855
5	CENPA	0	6.12165260314941	58.7993316650391
5	PARPBP	4.03224347111249e-67	6.10965156555176	17.5104942321777
5	NEIL3	1.04715438102051e-168	6.10191011428833	27.8544025421143
5	NEK2	9.01061578829568e-126	6.06779718399048	24.0324172973633
5	KIF11	0	6.01715087890625	47.6398582458496
5	HIST1H2AB	3.1279619622984e-151	6.00604391098022	26.3666725158691
5	CCNB2	0	5.95657348632812	52.4660835266113
5	CDKN3	0	5.94399785995483	44.5239601135254
5	MELK	3.4229033206336e-239	5.91201782226562	33.1808280944824
5	RACGAP1	0	5.88432884216309	55.8195419311523
5	FOXM1	3.40521591559407e-197	5.87229442596436	30.1209888458252
5	ANKLE1	1.14594220746932e-05	5.85954904556274	4.75742292404175
5	HIST1H2AN	3.22719958856602e-14	5.81056785583496	7.87405824661255
Cluster	Gene	P_adj	Log2FC	Scores
6	STRA6	1.07304394370137e-41	7.34688472747803	13.8389482498169
6	KRT79	8.84337659805267e-270	7.14328956604004	35.3041687011719
6	HSD17B13	2.51867975671014e-05	6.98903751373291	4.73956727981567
6	RBP1	0	6.04862594604492	45.1743240356445
6	GATA6	1.77443498765337e-81	5.97646570205688	19.3845386505127
6	DPYSL3	4.00677237137242e-202	5.83324146270752	30.558910369873
6	CALHM5	0.0404969900766269	5.83170890808105	2.741206407547
6	1010001N08RIK	0.849456892622798	5.79037141799927	1.24365401268005
6	BTC	0.00121899957907995	5.5893383026123	3.82140493392944
6	AA467197	0.570900871898695	5.41835832595825	1.51621925830841
6	CSPRS	0.00736649482444554	5.31252861022949	3.31069660186768
6	KCND2	6.89643574650415e-09	5.3018217086792	6.25531196594238
6	ITPRID1	0.515825621204637	5.12481832504272	1.57990312576294
6	EPHB2	5.16600275928738e-29	5.09600830078125	11.5167598724365
6	NECAB1	0.386418056119773	4.93328952789307	1.74763071537018
6	CHRM3	0.000642194728372696	4.92652940750122	3.98764872550964
6	GSDMA3	0.35946020512514	4.84513282775879	1.7872759103775
6	CAR2	6.06997555122006e-05	4.74340724945068	4.54935026168823
6	GM14964	8.69875370978479e-09	4.65127563476562	6.21800470352173
6	ADAMTS5	4.42772467855373e-56	4.64295291900635	16.0654449462891
6	KIF26B	8.90115161563493e-149	4.6277961730957	26.2165374755859
6	GAS7	0	4.5707540512085	38.535572052002
6	CYP27A1	2.18017162793484e-31	4.53723287582397	11.9861183166504
6	RGS4	0.0850668890002924	4.53436803817749	2.45567488670349
6	GLP2R	0.56241237403123	4.45084762573242	1.52541267871857
6	ARHGAP28	1.21932217554166e-29	4.44555950164795	11.6430511474609
6	NEBL	1.2690546231005e-303	4.40381956100464	37.4504356384277
6	KRT7	1.04475463815374e-26	4.13087749481201	11.0419111251831
6	FOXC1	5.02770402921032e-104	4.10947751998901	21.9107227325439
6	DEFB6	0	4.09736442565918	43.1708793640137
6	RUNX2	1.26278611615197e-44	4.06301784515381	14.3205480575562
6	CRIP3	0.615967584409453	4.03730249404907	1.46732664108276
6	RUNX2OS1	0.294558526937132	3.94670057296753	1.89427947998047
6	MKRN2OS	0.516433272431374	3.9360785484314	1.57923579216003
6	CD200	2.07715294987261e-99	3.89928960800171	21.4172592163086
6	SOX9	0	3.88614892959595	50.5073699951172
6	SLIT3	1.57987693928989e-91	3.86699509620667	20.5496444702148
6	RASGRF1	0.00237852984692529	3.85104203224182	3.63832259178162
6	ADGRL3	3.20553996053312e-219	3.8264524936676	31.8231201171875
6	TMPRSS11B	0.556973211049203	3.73415851593018	1.53165638446808
6	INHBA	0.0708174146502697	3.73038005828857	2.52864694595337
6	TMPRSS11E	0.478873118195446	3.72931957244873	1.62432503700256
6	E030044B06RIK	0.232197082424964	3.70485663414001	2.01379776000977
6	TRBC1	0.0880321038075045	3.66461515426636	2.44177484512329
6	LBH	3.71771428873154e-15	3.63090515136719	8.26660633087158
6	C9	0.241064982982354	3.62760734558105	1.99533867835999
6	CST6	5.48709538032615e-158	3.61162638664246	27.0158348083496
6	DCLK1	9.43905643062613e-12	3.60377979278564	7.24500322341919
6	PRSS22	0.00160932531830127	3.56547594070435	3.74704599380493
6	CREB3L1	1.40132421204044e-06	3.52662324905396	5.32340240478516
Cluster	Gene	P_adj	Log2FC	Scores
7	SERPINA12	6.01706866362428e-28	8.25470161437988	11.1678524017334
7	P2RY4	0.247551118111357	7.88797092437744	1.77534985542297
7	HRNR	2.67773709344364e-258	7.80165767669678	34.4548645019531
7	2210020O09RIK	0.00018465483062259	7.34697294235229	4.10992193222046
7	GNG13	0.621802762733172	7.33516693115234	1.24647319316864
7	LYPD2	9.41315878898605e-06	7.27619934082031	4.76826906204224
7	ACP7	1.41474421482652e-66	7.17409658432007	17.4036712646484
7	DPPA5A	0.0103597707735062	7.16909551620483	3.01191353797913
7	FLG2	1.27626959943744e-19	7.15228271484375	9.29261779785156
7	WFDC21	4.62026377456652e-34	7.13299179077148	12.3650150299072
7	KRTAP3-3	0.179088041564878	7.12058973312378	1.9313873052597
7	KPRP	7.90072371855818e-60	7.10812282562256	16.4851760864258
7	1700029B22RIK	3.15274330074079e-08	7.07223987579346	5.83247137069702
7	GM32089	1.14664874761965e-37	7.06501579284668	13.0201940536499
7	LCE3A	0.887015678685349	7.03519201278687	0.991309583187103
7	CAPN9	1.16063370653358e-136	7.00405931472778	25.0204524993896
7	NCCRP1	1.21930867679444e-168	6.93050050735474	27.8133945465088
7	EREG	4.19404155750916e-162	6.88758087158203	27.2659378051758
7	SLC6A19	9.78321651929353e-64	6.84466028213501	17.0230178833008
7	LCE1F	1.78475551569466e-09	6.74339056015015	6.30414581298828
7	MBOAT2	0	6.65540742874146	58.0228385925293
7	LYPD5	0	6.62109661102295	43.6505966186523
7	FCHO1	8.31079025009431e-94	6.54591941833496	20.698392868042
7	UNC93A2	0.0421664712022483	6.52186298370361	2.5310685634613
7	GM36546	0.744607670049629	6.49947643280029	1.12282574176788
7	WFDC18	0.060315176742672	6.48421955108643	2.39576530456543
7	CDSN	5.20833037284946e-244	6.46947622299194	33.4850807189941
7	PRSS27	2.51975354022788e-30	6.3852710723877	11.6479902267456
7	KLK5	0	6.33996534347534	46.1286430358887
7	DKKL1	0	6.32713270187378	58.8075485229492
7	CCL6	1.22657694566293e-07	6.29141759872437	5.59609365463257
7	PDE1B	2.80160656057448e-56	6.27965021133423	15.9807252883911
7	CNFN	0	6.26619434356689	53.2863349914551
7	ADH6A	2.42157011324966e-144	6.26522922515869	25.7184505462646
7	TNFRSF13C	0.02212554698259	6.23164367675781	2.76212811470032
7	TRIM15	0.517921512473168	6.22447872161865	1.36388611793518
7	FLG	1.2698125678711e-30	6.15369462966919	11.706844329834
7	ANXA9	3.3210944979939e-83	6.14347314834595	19.4819564819336
7	KRT78	0	5.98019075393677	53.1657066345215
7	RNF222	1.00644159860444e-26	5.96278858184814	10.912127494812
7	ASB2	0.00385735912792629	5.9543514251709	3.31330871582031
7	CLDN23	1.50167530700957e-155	5.92050981521606	26.7049293518066
7	SLURP1	0	5.89539098739624	47.1829528808594
7	GM33497	0.347040176038897	5.88760566711426	1.5970801115036
7	LOR	1.48529155296195e-42	5.88690805435181	13.8592195510864
7	KLK7	0	5.87617826461792	38.253791809082
7	GM12968	1.05350994098317e-11	5.79673099517822	7.06831121444702
7	LY6M	2.58133289982809e-25	5.66663885116577	10.6101551055908
7	FLVCR2	3.85625168621338e-15	5.60293054580688	8.10730075836182
7	5430419D17RIK	0.0928642236898836	5.58895397186279	2.22139072418213
Cluster	Gene	P_adj	Log2FC	Scores
8	GM13178	0.0925376764090557	25.4961643218994	2.31674695014954
8	METTL7B	1.22113286721738e-18	11.8447828292847	9.12734031677246
8	PANX3	0.017769962876835	10.575984954834	2.92763662338257
8	ACOXL	1.76006689678082e-92	10.5469598770142	20.6167488098145
8	GM36107	0.00239001061075344	10.5213975906372	3.54084444046021
8	GM48972	0.0263963279717815	10.4786577224731	2.79137635231018
8	AVPR1A	4.41593183840754e-230	9.91655826568604	32.5882835388184
8	ACOX2	9.75648283727386e-59	9.8231143951416	16.4001369476318
8	GM436	0.230930464875862	9.78618335723877	1.90553116798401
8	CLSTN3	1.97152716262665e-39	9.61326599121094	13.4017715454102
8	WSCD2	1.3634768289632e-105	9.57973670959473	22.0399894714355
8	ELOVL3	9.95074864681164e-17	9.53126239776611	8.62935733795166
8	CES1D	6.73610678237889e-50	9.52695655822754	15.1009035110474
8	GM5678	4.81272917502191e-07	9.25263404846191	5.43729543685913
8	FOXS1	0.00769220786184744	9.23948669433594	3.1956832408905
8	FA2H	2.53282534476693e-43	9.18265247344971	14.0573854446411
8	ZFP385B	5.51393358856019e-118	9.14703464508057	23.3038845062256
8	GM50337	0.079145883387661	9.04364681243896	2.38124632835388
8	SOAT1	6.10866293594946e-165	9.00583457946777	27.5762519836426
8	IFNK	3.73188573507571e-13	8.9823055267334	7.60984230041504
8	ACAA1B	3.72307519891598e-30	8.8555154800415	11.6893081665039
8	GM29680	0.00190964070862097	8.82384777069092	3.60298824310303
8	LAMA4	1.41263712881623e-301	8.78690528869629	37.3289566040039
8	CLMP	1.73767924314302e-263	8.75817489624023	34.888256072998
8	ANKRD31	8.77924701300609e-15	8.6599588394165	8.09008598327637
8	AKR1C19	1.83605006509698e-29	8.65542316436768	11.5512704849243
8	PLIN2	0	8.64722633361816	41.8661460876465
8	AKR1C18	0	8.53748893737793	41.2052268981934
8	MC5R	2.8248047589549e-09	8.52598857879639	6.31810283660889
8	ZFP872	0.264684921016807	8.52300548553467	1.83618569374084
8	PPARG	1.66929532052621e-85	8.51463031768799	19.8174591064453
8	OXTR	7.77317161335445e-14	8.47996616363525	7.81487512588501
8	CIDEC	0.0182158387000512	8.42691707611084	2.91934180259705
8	LNCBATE6	0.741799151551035	8.3898868560791	1.22291970252991
8	PKP2	1.06570747507883e-133	8.25123882293701	24.8151950836182
8	AXDND1	3.01196174204933e-09	8.21583461761475	6.30782461166382
8	LPL	1.60399437180903e-117	8.190993309021	23.2576866149902
8	6030469F06RIK	0.546799938542407	8.15694522857666	1.42614018917084
8	GM48877	7.83451295941642e-10	8.12474250793457	6.51984310150146
8	GM46516	0.672580116428729	8.10913848876953	1.29106497764587
8	GM36041	0.0183382092200686	8.09445953369141	2.91708016395569
8	FAR2	1.94169284995793e-52	8.03726387023926	15.4854974746704
8	GM5538	0.43805223707661	7.97583818435669	1.56239128112793
8	ACOT5	0.0808009958227645	7.88462352752686	2.37308287620544
8	1700028P14RIK	0.549815771848026	7.78337049484253	1.42273092269897
8	CD36	0.00255136224829792	7.78285646438599	3.52209448814392
8	SYNPR	6.40556069489202e-18	7.62520456314087	8.94184970855713
8	PDK4	7.73261851963439e-208	7.55088472366333	30.965353012085
8	CHST1	0.0032003073328055	7.49737167358398	3.45722699165344
8	GPD1	0.039874838525304	7.46806335449219	2.6440258026123
Cluster	Gene	P_adj	Log2FC	Scores
9	CPA3	0.810528827190103	9.73089981079102	1.54082655906677
9	ACOD1	0.811555567402825	9.54518795013428	1.53979134559631
9	MCPT4	0.305228673519056	9.13552474975586	2.15191769599915
9	RAC2	0.457452533836005	8.64551258087158	1.92586243152618
9	MUSTN1	0.458448587917419	8.3771276473999	1.92383873462677
9	FLI1	0.00176837377020094	8.21984100341797	4.0004768371582
9	CMA1	0.0982982399606824	8.00136375427246	2.67855668067932
9	ARHGAP15	0.00137646426669009	7.86292934417725	4.06794166564941
9	C1QTNF2	0.591221647466099	7.82215690612793	1.76928722858429
9	RUNX1T1	0.000109563033618982	7.78673505783081	4.69093084335327
9	LAYN	0.0799203592254883	7.77619981765747	2.76519346237183
9	IL10RA	0.592061814605907	7.73309946060181	1.76826691627502
9	MIR142HG	0.00102286232335125	7.73268032073975	4.14685678482056
9	ST8SIA4	0.0665929676450684	7.72815132141113	2.83779835700989
9	ZFP521	1.95681979856289e-14	7.71524572372437	8.29883480072021
9	GLDN	0.00902033559863901	7.67104959487915	3.53147673606873
9	CTLA2B	0.817713221387375	7.6284122467041	1.53352081775665
9	TWIST2	0.00243463998845177	7.58512735366821	3.91283631324768
9	CDH19	0.817713221387375	7.56050252914429	1.53360152244568
9	ZFP536	0.895936620316227	7.55366611480713	1.45729732513428
9	PTGIS	0.116385200357412	7.52248811721802	2.60582685470581
9	KLRB1B	0.740499121110958	7.49889707565308	1.60976564884186
9	CYTH4	0.73796023232083	7.48932838439941	1.6126697063446
9	HTRA3	0.000419386946680007	7.46762037277222	4.3734827041626
9	CLEC4D	0.0821641702557504	7.45657634735107	2.75379395484924
9	ICOS	0.16656226274289	7.42447471618652	2.45021891593933
9	ATP8B4	0.00550598845924712	7.41379022598267	3.6781964302063
9	ZEB2	2.45064918180278e-59	7.39821767807007	16.7543106079102
9	PTPRC	7.40072262913094e-11	7.39224338531494	7.19420480728149
9	PTGIR	0.522356364440156	7.38161277770996	1.84333229064941
9	DOCK10	2.19543769815378e-17	7.35943269729614	9.10372066497803
9	SERPINF1	8.52115090640327e-12	7.3492636680603	7.49880647659302
9	IKZF1	0.00545026130074657	7.34810543060303	3.68100500106812
9	PRRX1	8.20714385886862e-24	7.33936405181885	10.6537027359009
9	FCGR2B	0.309078639871007	7.32454490661621	2.14419627189636
9	CD3D	0.116385200357412	7.3211841583252	2.60559773445129
9	PLEK	6.1365837737033e-05	7.30329132080078	4.82095193862915
9	FXYD1	0.000555802293011647	7.28851509094238	4.30283832550049
9	MECOM	0.00562488318048683	7.28638076782227	3.67209982872009
9	FIGN	0.306277211941597	7.27827310562134	2.14917254447937
9	SRPX2	0.0803800950671355	7.26666259765625	2.76287293434143
9	SAMSN1	6.0347196304343e-05	7.26159858703613	4.82490396499634
9	ABCA8A	0.524182297076473	7.25018930435181	1.84125769138336
9	QPCT	0.408445835709582	7.2355523109436	1.99060773849487
9	FGL2	0.00247879528235547	7.21146583557129	3.90803384780884
9	COL15A1	0.407460898846117	7.20871353149414	1.99277567863464
9	ITK	9.09066571188656e-05	7.18216180801392	4.73341751098633
9	RARRES2	4.61787728453289e-06	7.1771183013916	5.35684204101562
9	COL6A3	4.81470889781968e-20	7.17317581176758	9.77694416046143
9	CD7	0.199262186050045	7.14666414260864	2.36524939537048
