# Supplementary material for: Loss of epidermal microRNA-149 sensitizes to skin inflammation
Source: Research Square preprint supplement (doi:10.21203/rs.3.rs-6047392/v1), 2025-07-29
Supplement: Supplementary file 9 [file dd476872a9273edd735b25fc.xlsx]

## Sheet: gsea_report_for_Mir149EKO
NAME	GS<br> follow link to MSigDB	SIZE	ES	NES	NOM p-val	FDR q-val	FWER p-val	RANK AT MAX	LEADING EDGE
GOBP_TUMOR_NECROSIS_FACTOR_SUPERFAMILY_CYTOKINE_PRODUCTION	GOBP_TUMOR_NECROSIS_FACTOR_SUPERFAMILY_CYTOKINE_PRODUCTION	165	0.551162	2.58359	0.0159046	0.0617411	0.012	2781	tags=53%, list=20%, signal=65%
GOBP_POSITIVE_REGULATION_OF_TUMOR_NECROSIS_FACTOR_SUPERFAMILY_CYTOKINE_PRODUCTION	GOBP_POSITIVE_REGULATION_OF_TUMOR_NECROSIS_FACTOR_SUPERFAMILY_CYTOKINE_PRODUCTION	100	0.586621	2.47931	0.0120968	0.0363244	0.025	2707	tags=55%, list=19%, signal=68%
GOBP_NEGATIVE_REGULATION_OF_TUMOR_NECROSIS_FACTOR_SUPERFAMILY_CYTOKINE_PRODUCTION	GOBP_NEGATIVE_REGULATION_OF_TUMOR_NECROSIS_FACTOR_SUPERFAMILY_CYTOKINE_PRODUCTION	55	0.55315	2.24746	0.0160966	0.0310777	0.143	2781	tags=55%, list=20%, signal=68%
GOBP_RESPONSE_TO_TUMOR_NECROSIS_FACTOR	GOBP_RESPONSE_TO_TUMOR_NECROSIS_FACTOR	157	0.341924	1.81798	0.0220884	0.0790898	0.529	3601	tags=39%, list=26%, signal=52%
GOBP_POSITIVE_REGULATION_OF_CYTOKINE_PRODUCTION	GOBP_POSITIVE_REGULATION_OF_CYTOKINE_PRODUCTION	414	0.457	2.45187	0.0158103	0.0314793	0.031	2790	tags=41%, list=20%, signal=50%
GOBP_REGULATION_OF_LEUKOCYTE_MEDIATED_IMMUNITY	GOBP_REGULATION_OF_LEUKOCYTE_MEDIATED_IMMUNITY	203	0.499318	2.63408	0.0153846	0.196495	0.009	1988	tags=39%, list=14%, signal=45%
GOBP_POSITIVE_REGULATION_OF_CHEMOKINE_PRODUCTION	GOBP_POSITIVE_REGULATION_OF_CHEMOKINE_PRODUCTION	63	0.622321	2.47138	0.00389864	0.0355525	0.027	2789	tags=60%, list=20%, signal=75%
GOBP_LYMPHOCYTE_MEDIATED_IMMUNITY	GOBP_LYMPHOCYTE_MEDIATED_IMMUNITY	239	0.489537	2.62181	0.0117647	0.108454	0.01	1988	tags=38%, list=14%, signal=44%
GOBP_POSITIVE_REGULATION_OF_IMMUNE_EFFECTOR_PROCESS	GOBP_POSITIVE_REGULATION_OF_IMMUNE_EFFECTOR_PROCESS	231	0.503045	2.61581	0.0155039	0.0925739	0.01	2081	tags=41%, list=15%, signal=47%
GOBP_REGULATION_OF_IMMUNE_EFFECTOR_PROCESS	GOBP_REGULATION_OF_IMMUNE_EFFECTOR_PROCESS	329	0.490386	2.59741	0.0160321	0.0845907	0.011	2081	tags=40%, list=15%, signal=45%
GOBP_REGULATION_OF_INFLAMMATORY_RESPONSE	GOBP_REGULATION_OF_INFLAMMATORY_RESPONSE	282	0.458957	2.48509	0.0156556	0.0393246	0.024	3532	tags=48%, list=25%, signal=63%
GOBP_NEGATIVE_REGULATION_OF_IMMUNE_RESPONSE	GOBP_NEGATIVE_REGULATION_OF_IMMUNE_RESPONSE	152	0.510324	2.58592	0.0152091	0.0685779	0.012	2214	tags=43%, list=16%, signal=51%
GOBP_ADAPTIVE_IMMUNE_RESPONSE	GOBP_ADAPTIVE_IMMUNE_RESPONSE	338	0.474731	2.56643	0.015444	0.0616327	0.014	2024	tags=37%, list=15%, signal=42%
GOBP_RESPONSE_TO_TYPE_II_INTERFERON	GOBP_RESPONSE_TO_TYPE_II_INTERFERON	121	0.525202	2.4873	0.0154143	0.0403803	0.024	2711	tags=51%, list=19%, signal=63%
GOBP_MYELOID_CELL_ACTIVATION_INVOLVED_IN_IMMUNE_RESPONSE	GOBP_MYELOID_CELL_ACTIVATION_INVOLVED_IN_IMMUNE_RESPONSE	84	0.60339	2.55779	0.00776699	0.0548697	0.014	2081	tags=51%, list=15%, signal=60%
GOBP_POSITIVE_REGULATION_OF_RESPONSE_TO_EXTERNAL_STIMULUS	GOBP_POSITIVE_REGULATION_OF_RESPONSE_TO_EXTERNAL_STIMULUS	482	0.484519	2.55632	0.015748	0.0513278	0.014	2414	tags=41%, list=17%, signal=47%
GOBP_ADAPTIVE_IMMUNE_RESPONSE_BASED_ON_SOMATIC_RECOMBINATION_OF_IMMUNE_RECEPTORS_BUILT_FROM_IMMUNOGLOBULIN_SUPERFAMILY_DOMAINS	GOBP_ADAPTIVE_IMMUNE_RESPONSE_BASED_ON_SOMATIC_RECOMBINATION_OF_IMMUNE_RECEPTORS_BUILT_FROM_IMMUNOGLOBULIN_SUPERFAMILY_DOMAINS	262	0.47305	2.54812	0.0158103	0.0505204	0.014	1988	tags=37%, list=14%, signal=42%
GOBP_INTERLEUKIN_6_PRODUCTION	GOBP_INTERLEUKIN_6_PRODUCTION	151	0.538859	2.50634	0.0159046	0.03637	0.021	2790	tags=52%, list=20%, signal=65%
GOBP_CELL_CHEMOTAXIS	GOBP_CELL_CHEMOTAXIS	251	0.545284	2.54178	0.015625	0.045769	0.015	3282	tags=55%, list=24%, signal=71%
GOBP_REGULATION_OF_LYMPHOCYTE_MEDIATED_IMMUNITY	GOBP_REGULATION_OF_LYMPHOCYTE_MEDIATED_IMMUNITY	147	0.470411	2.53934	0.0117878	0.0437793	0.015	1988	tags=36%, list=14%, signal=42%
GOBP_DEFENSE_RESPONSE_TO_BACTERIUM	GOBP_DEFENSE_RESPONSE_TO_BACTERIUM	195	0.586724	2.53807	0.00784314	0.0415663	0.015	1930	tags=48%, list=14%, signal=55%
GOBP_PHAGOCYTOSIS	GOBP_PHAGOCYTOSIS	196	0.54676	2.53558	0.016129	0.0398545	0.015	2024	tags=45%, list=15%, signal=52%
GOBP_MYELOID_LEUKOCYTE_MEDIATED_IMMUNITY	GOBP_MYELOID_LEUKOCYTE_MEDIATED_IMMUNITY	89	0.579566	2.52477	0.0151803	0.0406644	0.018	1268	tags=42%, list=9%, signal=45%
GOBP_REGULATION_OF_LEUKOCYTE_MIGRATION	GOBP_REGULATION_OF_LEUKOCYTE_MIGRATION	206	0.549659	2.52365	0.0194553	0.0393883	0.019	2786	tags=52%, list=20%, signal=64%
GOBP_LEUKOCYTE_DEGRANULATION	GOBP_LEUKOCYTE_DEGRANULATION	66	0.59541	2.52308	0.0155039	0.0377359	0.019	1659	tags=45%, list=12%, signal=51%
GOBP_POSITIVE_REGULATION_OF_DEFENSE_RESPONSE	GOBP_POSITIVE_REGULATION_OF_DEFENSE_RESPONSE	362	0.463339	2.51484	0.0176471	0.0381403	0.019	2081	tags=36%, list=15%, signal=42%
GOBP_IMMUNE_RESPONSE_REGULATING_SIGNALING_PATHWAY	GOBP_IMMUNE_RESPONSE_REGULATING_SIGNALING_PATHWAY	320	0.444437	2.51048	0.0157791	0.0371397	0.019	2024	tags=34%, list=15%, signal=39%
GOBP_CELL_ACTIVATION_INVOLVED_IN_IMMUNE_RESPONSE	GOBP_CELL_ACTIVATION_INVOLVED_IN_IMMUNE_RESPONSE	239	0.484825	2.54219	0.0119522	0.0486839	0.014	2081	tags=36%, list=15%, signal=42%
GOBP_ACTIVATION_OF_IMMUNE_RESPONSE	GOBP_ACTIVATION_OF_IMMUNE_RESPONSE	377	0.462399	2.55828	0.015748	0.0594131	0.014	2024	tags=36%, list=15%, signal=41%
GOBP_IMMUNE_RESPONSE_REGULATING_CELL_SURFACE_RECEPTOR_SIGNALING_PATHWAY	GOBP_IMMUNE_RESPONSE_REGULATING_CELL_SURFACE_RECEPTOR_SIGNALING_PATHWAY	215	0.477545	2.59301	0.0117647	0.0755069	0.012	1979	tags=36%, list=14%, signal=42%
GOBP_MYELOID_LEUKOCYTE_MIGRATION	GOBP_MYELOID_LEUKOCYTE_MIGRATION	195	0.571442	2.4842	0.0174757	0.0380621	0.024	2786	tags=55%, list=20%, signal=68%
GOBP_MONONUCLEAR_CELL_MIGRATION	GOBP_MONONUCLEAR_CELL_MIGRATION	153	0.546875	2.48042	0.015444	0.0374723	0.025	3778	tags=62%, list=27%, signal=84%
GOBP_REGULATION_OF_CHEMOTAXIS	GOBP_REGULATION_OF_CHEMOTAXIS	204	0.516281	2.47746	0.0177866	0.0356927	0.025	2806	tags=48%, list=20%, signal=59%
GOBP_LEUKOCYTE_MIGRATION	GOBP_LEUKOCYTE_MIGRATION	315	0.547608	2.62367	0.0153846	0.140596	0.01	2786	tags=51%, list=20%, signal=63%
GOBP_T_CELL_PROLIFERATION	GOBP_T_CELL_PROLIFERATION	195	0.44471	2.46925	0.0151803	0.0350524	0.027	3972	tags=51%, list=29%, signal=71%
GOBP_NEGATIVE_REGULATION_OF_IMMUNE_SYSTEM_PROCESS	GOBP_NEGATIVE_REGULATION_OF_IMMUNE_SYSTEM_PROCESS	400	0.457667	2.46658	0.016	0.034404	0.028	2419	tags=39%, list=17%, signal=45%
GOBP_REGULATION_OF_INNATE_IMMUNE_RESPONSE	GOBP_REGULATION_OF_INNATE_IMMUNE_RESPONSE	315	0.453432	2.46488	0.0158416	0.0339367	0.028	2024	tags=35%, list=15%, signal=40%
GOBP_CHEMOKINE_PRODUCTION	GOBP_CHEMOKINE_PRODUCTION	93	0.549512	2.46476	0.00792079	0.0330218	0.028	2789	tags=51%, list=20%, signal=63%
GOBP_PRODUCTION_OF_MOLECULAR_MEDIATOR_INVOLVED_IN_INFLAMMATORY_RESPONSE	GOBP_PRODUCTION_OF_MOLECULAR_MEDIATOR_INVOLVED_IN_INFLAMMATORY_RESPONSE	79	0.525757	2.46308	0.0160643	0.0325567	0.028	2338	tags=47%, list=17%, signal=56%
GOBP_POSITIVE_REGULATION_OF_VASCULATURE_DEVELOPMENT	GOBP_POSITIVE_REGULATION_OF_VASCULATURE_DEVELOPMENT	153	0.541932	2.46225	0.0177866	0.0318053	0.028	2527	tags=48%, list=18%, signal=58%
GOBP_CYTOKINE_PRODUCTION_INVOLVED_IN_IMMUNE_RESPONSE	GOBP_CYTOKINE_PRODUCTION_INVOLVED_IN_IMMUNE_RESPONSE	119	0.477011	2.45589	0.016	0.0320915	0.031	2781	tags=45%, list=20%, signal=56%
GOBP_REGULATION_OF_PHAGOCYTOSIS	GOBP_REGULATION_OF_PHAGOCYTOSIS	100	0.590301	2.45412	0.0155039	0.031666	0.031	2024	tags=52%, list=15%, signal=60%
GOBP_LEUKOCYTE_MEDIATED_IMMUNITY	GOBP_LEUKOCYTE_MEDIATED_IMMUNITY	322	0.515467	2.69178	0.0156863	0.264726	0.008	1993	tags=41%, list=14%, signal=46%
GOBP_REGULATION_OF_ADAPTIVE_IMMUNE_RESPONSE	GOBP_REGULATION_OF_ADAPTIVE_IMMUNE_RESPONSE	174	0.46023	2.45114	0.0159363	0.0308492	0.031	2024	tags=36%, list=15%, signal=42%
GOBP_MYELOID_LEUKOCYTE_ACTIVATION	GOBP_MYELOID_LEUKOCYTE_ACTIVATION	207	0.56123	2.45076	0.015625	0.0302485	0.031	2241	tags=48%, list=16%, signal=56%
GOBP_REGULATION_OF_MONONUCLEAR_CELL_MIGRATION	GOBP_REGULATION_OF_MONONUCLEAR_CELL_MIGRATION	106	0.534527	2.44875	0.019305	0.0298779	0.031	3778	tags=61%, list=27%, signal=83%
GOBP_LEUKOCYTE_PROLIFERATION	GOBP_LEUKOCYTE_PROLIFERATION	292	0.453231	2.4454	0.0158103	0.0298566	0.031	3132	tags=45%, list=22%, signal=56%
GOBP_POSITIVE_REGULATION_OF_RESPONSE_TO_BIOTIC_STIMULUS	GOBP_POSITIVE_REGULATION_OF_RESPONSE_TO_BIOTIC_STIMULUS	278	0.45191	2.44312	0.0158416	0.029753	0.033	2024	tags=35%, list=15%, signal=40%
GOBP_DEFENSE_RESPONSE_TO_GRAM_POSITIVE_BACTERIUM	GOBP_DEFENSE_RESPONSE_TO_GRAM_POSITIVE_BACTERIUM	73	0.603549	2.4387	0.0114504	0.0297746	0.035	3013	tags=60%, list=22%, signal=77%
GOBP_REGULATION_OF_LEUKOCYTE_PROLIFERATION	GOBP_REGULATION_OF_LEUKOCYTE_PROLIFERATION	222	0.474419	2.4367	0.015625	0.0294057	0.035	3692	tags=52%, list=27%, signal=69%
GOBP_DEFENSE_RESPONSE_TO_SYMBIONT	GOBP_DEFENSE_RESPONSE_TO_SYMBIONT	248	0.456144	2.43349	0.0174419	0.0295032	0.035	2522	tags=40%, list=18%, signal=47%
GOBP_REGULATION_OF_RESPONSE_TO_BIOTIC_STIMULUS	GOBP_REGULATION_OF_RESPONSE_TO_BIOTIC_STIMULUS	392	0.426651	2.43181	0.0158416	0.0291944	0.035	2024	tags=32%, list=15%, signal=37%
GOBP_POSITIVE_REGULATION_OF_LEUKOCYTE_MIGRATION	GOBP_POSITIVE_REGULATION_OF_LEUKOCYTE_MIGRATION	143	0.567194	2.42923	0.0157791	0.029073	0.035	2786	tags=55%, list=20%, signal=68%
GOBP_COLLAGEN_METABOLIC_PROCESS	GOBP_COLLAGEN_METABOLIC_PROCESS	101	0.543936	2.41783	0.0199601	0.0307619	0.044	4036	tags=63%, list=29%, signal=89%
GOBP_B_CELL_MEDIATED_IMMUNITY	GOBP_B_CELL_MEDIATED_IMMUNITY	111	0.513034	2.41013	0.016129	0.031949	0.044	1988	tags=41%, list=14%, signal=48%
GOBP_POSITIVE_REGULATION_OF_CYTOKINE_PRODUCTION_INVOLVED_IN_IMMUNE_RESPONSE	GOBP_POSITIVE_REGULATION_OF_CYTOKINE_PRODUCTION_INVOLVED_IN_IMMUNE_RESPONSE	68	0.498726	2.40077	0.0120968	0.0330725	0.044	2567	tags=46%, list=18%, signal=56%
GOBP_NEGATIVE_REGULATION_OF_IMMUNE_EFFECTOR_PROCESS	GOBP_NEGATIVE_REGULATION_OF_IMMUNE_EFFECTOR_PROCESS	100	0.496636	2.40042	0.0179283	0.0326343	0.044	2639	tags=47%, list=19%, signal=58%
GOBP_REGULATION_OF_VASCULATURE_DEVELOPMENT	GOBP_REGULATION_OF_VASCULATURE_DEVELOPMENT	264	0.47368	2.40004	0.0242915	0.0321237	0.044	1948	tags=36%, list=14%, signal=41%
GOBP_LEUKOCYTE_CHEMOTAXIS	GOBP_LEUKOCYTE_CHEMOTAXIS	189	0.571335	2.39661	0.0155945	0.0322075	0.045	1948	tags=47%, list=14%, signal=54%
GOBP_POSITIVE_REGULATION_OF_LEUKOCYTE_MEDIATED_IMMUNITY	GOBP_POSITIVE_REGULATION_OF_LEUKOCYTE_MEDIATED_IMMUNITY	121	0.452067	2.39496	0.0118343	0.0319819	0.046	1988	tags=34%, list=14%, signal=39%
GOBP_LYMPHOCYTE_MIGRATION	GOBP_LYMPHOCYTE_MIGRATION	91	0.557757	2.39419	0.015748	0.0315783	0.048	2780	tags=51%, list=20%, signal=63%
GOBP_COAGULATION	GOBP_COAGULATION	140	0.475403	2.3909	0.0239521	0.0317068	0.054	2339	tags=41%, list=17%, signal=48%
GOBP_POSITIVE_REGULATION_OF_CELL_ACTIVATION	GOBP_POSITIVE_REGULATION_OF_CELL_ACTIVATION	340	0.437267	2.38878	0.0159681	0.0314475	0.054	2094	tags=33%, list=15%, signal=38%
GOBP_LEUKOCYTE_CELL_CELL_ADHESION	GOBP_LEUKOCYTE_CELL_CELL_ADHESION	332	0.442478	2.38833	0.0160643	0.0309885	0.054	2707	tags=38%, list=19%, signal=46%
GOBP_GLIAL_CELL_DEVELOPMENT	GOBP_GLIAL_CELL_DEVELOPMENT	111	0.454359	2.38642	0	0.0308612	0.054	2002	tags=34%, list=14%, signal=40%
GOBP_POSITIVE_REGULATION_OF_TYROSINE_PHOSPHORYLATION_OF_STAT_PROTEIN	GOBP_POSITIVE_REGULATION_OF_TYROSINE_PHOSPHORYLATION_OF_STAT_PROTEIN	36	0.597442	2.38437	0	0.0307161	0.058	1714	tags=44%, list=12%, signal=51%
GOBP_REGULATION_OF_LEUKOCYTE_DEGRANULATION	GOBP_REGULATION_OF_LEUKOCYTE_DEGRANULATION	41	0.60223	2.37865	0.023622	0.0312511	0.061	1659	tags=49%, list=12%, signal=55%
GOBP_POSITIVE_REGULATION_OF_INFLAMMATORY_RESPONSE	GOBP_POSITIVE_REGULATION_OF_INFLAMMATORY_RESPONSE	118	0.52104	2.37788	0.015625	0.0309602	0.062	3458	tags=55%, list=25%, signal=73%
GOBP_POSITIVE_REGULATION_OF_CHEMOTAXIS	GOBP_POSITIVE_REGULATION_OF_CHEMOTAXIS	134	0.51298	2.37286	0.019305	0.0314595	0.065	2414	tags=44%, list=17%, signal=53%
GOBP_REGULATION_OF_PRODUCTION_OF_MOLECULAR_MEDIATOR_OF_IMMUNE_RESPONSE	GOBP_REGULATION_OF_PRODUCTION_OF_MOLECULAR_MEDIATOR_OF_IMMUNE_RESPONSE	165	0.444951	2.37161	0.0160643	0.0312018	0.065	3317	tags=45%, list=24%, signal=59%
GOBP_CELL_SURFACE_PATTERN_RECOGNITION_RECEPTOR_SIGNALING_PATHWAY	GOBP_CELL_SURFACE_PATTERN_RECOGNITION_RECEPTOR_SIGNALING_PATHWAY	55	0.562934	2.36757	0.011811	0.0315869	0.065	3045	tags=56%, list=22%, signal=72%
GOBP_T_CELL_MIGRATION	GOBP_T_CELL_MIGRATION	58	0.578126	2.36184	0.015625	0.0322751	0.065	1534	tags=43%, list=11%, signal=48%
GOBP_T_CELL_MEDIATED_IMMUNITY	GOBP_T_CELL_MEDIATED_IMMUNITY	107	0.466607	2.36176	0.0119284	0.0318773	0.065	1931	tags=36%, list=14%, signal=42%
GOBP_RESPONSE_TO_MOLECULE_OF_BACTERIAL_ORIGIN	GOBP_RESPONSE_TO_MOLECULE_OF_BACTERIAL_ORIGIN	251	0.457146	2.35898	0.0163265	0.0319311	0.065	2024	tags=36%, list=15%, signal=41%
GOBP_ACTIVATION_OF_INNATE_IMMUNE_RESPONSE	GOBP_ACTIVATION_OF_INNATE_IMMUNE_RESPONSE	204	0.465444	2.35326	0.0177515	0.0322355	0.068	3086	tags=45%, list=22%, signal=57%
GOBP_REGULATION_OF_T_CELL_PROLIFERATION	GOBP_REGULATION_OF_T_CELL_PROLIFERATION	154	0.44082	2.35277	0.0154739	0.0318836	0.069	3595	tags=48%, list=26%, signal=64%
GOBP_NEGATIVE_REGULATION_OF_CYTOKINE_PRODUCTION	GOBP_NEGATIVE_REGULATION_OF_CYTOKINE_PRODUCTION	237	0.441373	2.3514	0.0160966	0.0316045	0.069	2781	tags=40%, list=20%, signal=49%
GOBP_CELL_ADHESION_MEDIATED_BY_INTEGRIN	GOBP_CELL_ADHESION_MEDIATED_BY_INTEGRIN	82	0.577667	2.34658	0.0178926	0.0320353	0.07	2327	tags=50%, list=17%, signal=60%
GOBP_DEFENSE_RESPONSE_TO_GRAM_NEGATIVE_BACTERIUM	GOBP_DEFENSE_RESPONSE_TO_GRAM_NEGATIVE_BACTERIUM	45	0.626056	2.34657	0.0154739	0.0316322	0.07	2024	tags=56%, list=15%, signal=65%
GOBP_REGULATION_OF_CELL_ADHESION_MEDIATED_BY_INTEGRIN	GOBP_REGULATION_OF_CELL_ADHESION_MEDIATED_BY_INTEGRIN	44	0.54884	2.34653	0.0173077	0.0312783	0.07	2321	tags=48%, list=17%, signal=57%
GOBP_ENDOTHELIAL_CELL_PROLIFERATION	GOBP_ENDOTHELIAL_CELL_PROLIFERATION	144	0.468545	2.34513	0.0241449	0.031159	0.07	3617	tags=53%, list=26%, signal=71%
GOBP_ZYMOGEN_ACTIVATION	GOBP_ZYMOGEN_ACTIVATION	52	0.607731	2.34483	0.00795229	0.0308434	0.07	2791	tags=63%, list=20%, signal=79%
GOBP_GRANULOCYTE_MIGRATION	GOBP_GRANULOCYTE_MIGRATION	125	0.606957	2.34276	0.015625	0.0308555	0.071	3595	tags=69%, list=26%, signal=92%
GOBP_REGULATION_OF_MYELOID_LEUKOCYTE_MEDIATED_IMMUNITY	GOBP_REGULATION_OF_MYELOID_LEUKOCYTE_MEDIATED_IMMUNITY	53	0.607245	2.34262	0.0197239	0.0304915	0.071	1659	tags=49%, list=12%, signal=55%
GOBP_POSITIVE_REGULATION_OF_ERK1_AND_ERK2_CASCADE	GOBP_POSITIVE_REGULATION_OF_ERK1_AND_ERK2_CASCADE	179	0.469848	2.34223	0.0158103	0.0301596	0.071	3396	tags=47%, list=24%, signal=62%
GOBP_INTERLEUKIN_1_PRODUCTION	GOBP_INTERLEUKIN_1_PRODUCTION	102	0.523223	2.33895	0.0156556	0.0304827	0.077	2760	tags=49%, list=20%, signal=61%
GOBP_T_CELL_ACTIVATION	GOBP_T_CELL_ACTIVATION	470	0.400518	2.33888	0.0159681	0.030194	0.077	1988	tags=28%, list=14%, signal=32%
GOBP_REGULATION_OF_ANTIGEN_RECEPTOR_MEDIATED_SIGNALING_PATHWAY	GOBP_REGULATION_OF_ANTIGEN_RECEPTOR_MEDIATED_SIGNALING_PATHWAY	53	0.516996	2.33633	0.015748	0.0303519	0.077	1971	tags=43%, list=14%, signal=50%
GOBP_PRODUCTION_OF_MOLECULAR_MEDIATOR_OF_IMMUNE_RESPONSE	GOBP_PRODUCTION_OF_MOLECULAR_MEDIATOR_OF_IMMUNE_RESPONSE	229	0.42067	2.33485	0.0160321	0.0302126	0.078	3256	tags=42%, list=23%, signal=54%
GOBP_REGULATION_OF_LEUKOCYTE_CHEMOTAXIS	GOBP_REGULATION_OF_LEUKOCYTE_CHEMOTAXIS	112	0.549925	2.33381	0.0176125	0.0300293	0.079	3244	tags=57%, list=23%, signal=74%
GOBP_INTEGRIN_MEDIATED_SIGNALING_PATHWAY	GOBP_INTEGRIN_MEDIATED_SIGNALING_PATHWAY	90	0.581239	2.33315	0.021611	0.0297939	0.079	3102	tags=60%, list=22%, signal=77%
GOBP_INNATE_IMMUNE_RESPONSE_ACTIVATING_CELL_SURFACE_RECEPTOR_SIGNALING_PATHWAY	GOBP_INNATE_IMMUNE_RESPONSE_ACTIVATING_CELL_SURFACE_RECEPTOR_SIGNALING_PATHWAY	61	0.572322	2.33291	0.0155945	0.0295191	0.079	1859	tags=46%, list=13%, signal=53%
GOBP_REGULATION_OF_T_CELL_MIGRATION	GOBP_REGULATION_OF_T_CELL_MIGRATION	45	0.556901	2.33163	0.0137255	0.0293923	0.079	3743	tags=62%, list=27%, signal=85%
GOBP_CELLULAR_RESPONSE_TO_TYPE_II_INTERFERON	GOBP_CELLULAR_RESPONSE_TO_TYPE_II_INTERFERON	101	0.485426	2.33017	0.0156863	0.029214	0.079	2711	tags=47%, list=19%, signal=57%
GOBP_GRANULOCYTE_ACTIVATION	GOBP_GRANULOCYTE_ACTIVATION	37	0.693182	2.32923	0.00390625	0.0291665	0.079	999	tags=51%, list=7%, signal=55%
GOBP_TAXIS	GOBP_TAXIS	492	0.452623	2.32872	0.0204499	0.0289647	0.079	2531	tags=37%, list=18%, signal=44%
GOBP_LEUKOCYTE_ADHESION_TO_VASCULAR_ENDOTHELIAL_CELL	GOBP_LEUKOCYTE_ADHESION_TO_VASCULAR_ENDOTHELIAL_CELL	44	0.63098	2.32789	0.0235756	0.0288688	0.079	1485	tags=48%, list=11%, signal=53%
GOBP_TOLL_LIKE_RECEPTOR_4_SIGNALING_PATHWAY	GOBP_TOLL_LIKE_RECEPTOR_4_SIGNALING_PATHWAY	43	0.51646	2.32258	0.0114723	0.0296076	0.085	3045	tags=51%, list=22%, signal=65%
GOBP_NEGATIVE_REGULATION_OF_PEPTIDASE_ACTIVITY	GOBP_NEGATIVE_REGULATION_OF_PEPTIDASE_ACTIVITY	168	0.459064	2.32187	0.00397614	0.029394	0.085	2498	tags=40%, list=18%, signal=48%
GOBP_INTERLEUKIN_1_BETA_PRODUCTION	GOBP_INTERLEUKIN_1_BETA_PRODUCTION	86	0.565027	2.3188	0.0214844	0.0294718	0.088	2414	tags=50%, list=17%, signal=60%
GOBP_POSITIVE_REGULATION_OF_INTERLEUKIN_1_PRODUCTION	GOBP_POSITIVE_REGULATION_OF_INTERLEUKIN_1_PRODUCTION	61	0.578859	2.31746	0.0160643	0.0294582	0.088	2707	tags=54%, list=19%, signal=67%
GOBP_REGULATION_OF_BODY_FLUID_LEVELS	GOBP_REGULATION_OF_BODY_FLUID_LEVELS	238	0.430944	2.31654	0.0225873	0.0292647	0.088	3422	tags=44%, list=25%, signal=57%
GOBP_REGULATION_OF_MYELOID_LEUKOCYTE_DIFFERENTIATION	GOBP_REGULATION_OF_MYELOID_LEUKOCYTE_DIFFERENTIATION	119	0.479299	2.31346	0.0241935	0.0294404	0.089	1791	tags=36%, list=13%, signal=41%
GOBP_POSITIVE_REGULATION_OF_ADAPTIVE_IMMUNE_RESPONSE	GOBP_POSITIVE_REGULATION_OF_ADAPTIVE_IMMUNE_RESPONSE	114	0.421794	2.31254	0.0117647	0.0292975	0.089	2024	tags=32%, list=15%, signal=38%
GOBP_POSITIVE_REGULATION_OF_INTERLEUKIN_6_PRODUCTION	GOBP_POSITIVE_REGULATION_OF_INTERLEUKIN_6_PRODUCTION	95	0.49716	2.31241	0.0203666	0.0290623	0.09	2790	tags=47%, list=20%, signal=59%
GOBP_REGULATION_OF_LYMPHOCYTE_MIGRATION	GOBP_REGULATION_OF_LYMPHOCYTE_MIGRATION	58	0.529624	2.30978	0.0175097	0.0291764	0.09	3743	tags=59%, list=27%, signal=80%
GOBP_INNATE_IMMUNE_RESPONSE_ACTIVATING_SIGNALING_PATHWAY	GOBP_INNATE_IMMUNE_RESPONSE_ACTIVATING_SIGNALING_PATHWAY	171	0.447443	2.30686	0.0178571	0.0295248	0.09	2024	tags=35%, list=15%, signal=41%
GOBP_MAST_CELL_ACTIVATION_INVOLVED_IN_IMMUNE_RESPONSE	GOBP_MAST_CELL_ACTIVATION_INVOLVED_IN_IMMUNE_RESPONSE	47	0.617409	2.30218	0.0155642	0.0301946	0.094	2081	tags=53%, list=15%, signal=62%
GOBP_ANGIOGENESIS	GOBP_ANGIOGENESIS	480	0.438247	2.30189	0.0329897	0.0299781	0.094	2527	tags=38%, list=18%, signal=45%
GOBP_POSITIVE_REGULATION_OF_PRODUCTION_OF_MOLECULAR_MEDIATOR_OF_IMMUNE_RESPONSE	GOBP_POSITIVE_REGULATION_OF_PRODUCTION_OF_MOLECULAR_MEDIATOR_OF_IMMUNE_RESPONSE	114	0.444449	2.30091	0.0159046	0.0298384	0.094	2567	tags=39%, list=18%, signal=47%
GOBP_CYTOKINE_MEDIATED_SIGNALING_PATHWAY	GOBP_CYTOKINE_MEDIATED_SIGNALING_PATHWAY	332	0.415504	2.29584	0.0218254	0.0304687	0.099	2454	tags=36%, list=18%, signal=42%
GOBP_LEUKOCYTE_HOMEOSTASIS	GOBP_LEUKOCYTE_HOMEOSTASIS	113	0.472093	2.29442	0.018	0.0304209	0.099	3194	tags=49%, list=23%, signal=63%
GOBP_ASTROCYTE_DEVELOPMENT	GOBP_ASTROCYTE_DEVELOPMENT	33	0.617295	2.2943	0	0.0301651	0.099	2002	tags=52%, list=14%, signal=60%
GOBP_REGULATION_OF_COAGULATION	GOBP_REGULATION_OF_COAGULATION	55	0.552936	2.29366	0.0196078	0.0300654	0.1	3130	tags=60%, list=22%, signal=77%
GOBP_CELLULAR_EXTRAVASATION	GOBP_CELLULAR_EXTRAVASATION	66	0.641133	2.29259	0.0195695	0.0299229	0.1	2414	tags=59%, list=17%, signal=71%
GOBP_NEGATIVE_REGULATION_OF_CELL_ACTIVATION	GOBP_NEGATIVE_REGULATION_OF_CELL_ACTIVATION	181	0.490642	2.29208	0.0301811	0.0298179	0.101	2437	tags=41%, list=17%, signal=50%
GOBP_REGULATION_OF_VIRAL_LIFE_CYCLE	GOBP_REGULATION_OF_VIRAL_LIFE_CYCLE	129	0.465212	2.29179	0.0205339	0.0296277	0.101	2810	tags=41%, list=20%, signal=51%
GOBP_POSITIVE_REGULATION_OF_MONONUCLEAR_CELL_MIGRATION	GOBP_POSITIVE_REGULATION_OF_MONONUCLEAR_CELL_MIGRATION	61	0.53154	2.29164	0.0194932	0.0293809	0.101	3244	tags=56%, list=23%, signal=72%
GOBP_LEUKOCYTE_MEDIATED_CYTOTOXICITY	GOBP_LEUKOCYTE_MEDIATED_CYTOTOXICITY	105	0.513381	2.28966	0.0117188	0.0294743	0.105	2414	tags=45%, list=17%, signal=54%
GOBP_REGULATION_OF_OSTEOCLAST_DIFFERENTIATION	GOBP_REGULATION_OF_OSTEOCLAST_DIFFERENTIATION	68	0.567152	2.28926	0.00795229	0.0292836	0.105	1791	tags=44%, list=13%, signal=50%
GOBP_POSITIVE_REGULATION_OF_LEUKOCYTE_CHEMOTAXIS	GOBP_POSITIVE_REGULATION_OF_LEUKOCYTE_CHEMOTAXIS	88	0.541364	2.28733	0.0194175	0.0293651	0.107	3473	tags=59%, list=25%, signal=78%
GOBP_PLATELET_ACTIVATION	GOBP_PLATELET_ACTIVATION	81	0.5054	2.2834	0.0323232	0.0298255	0.109	2189	tags=42%, list=16%, signal=50%
GOBP_RESPONSE_TO_AMYLOID_BETA	GOBP_RESPONSE_TO_AMYLOID_BETA	34	0.581773	2.2825	0.0155642	0.0298777	0.11	2217	tags=53%, list=16%, signal=63%
GOBP_REGULATION_OF_VIRAL_GENOME_REPLICATION	GOBP_REGULATION_OF_VIRAL_GENOME_REPLICATION	79	0.502644	2.28143	0.0285714	0.0298541	0.11	2446	tags=42%, list=18%, signal=50%
GOBP_REGULATION_OF_MAST_CELL_ACTIVATION_INVOLVED_IN_IMMUNE_RESPONSE	GOBP_REGULATION_OF_MAST_CELL_ACTIVATION_INVOLVED_IN_IMMUNE_RESPONSE	31	0.632066	2.28058	0.0251451	0.0297669	0.11	2081	tags=58%, list=15%, signal=68%
GOBP_CELLULAR_RESPONSE_TO_BIOTIC_STIMULUS	GOBP_CELLULAR_RESPONSE_TO_BIOTIC_STIMULUS	196	0.457202	2.27575	0.0182927	0.0303962	0.112	2414	tags=39%, list=17%, signal=46%
GOBP_RESPONSE_TO_VIRUS	GOBP_RESPONSE_TO_VIRUS	298	0.417418	2.27514	0.0215264	0.0302256	0.112	2790	tags=39%, list=20%, signal=47%
GOBP_POSITIVE_REGULATION_OF_PHAGOCYTOSIS	GOBP_POSITIVE_REGULATION_OF_PHAGOCYTOSIS	69	0.635303	2.27394	0.0139442	0.0302308	0.112	2166	tags=58%, list=16%, signal=68%
GOBP_GRANULOCYTE_CHEMOTAXIS	GOBP_GRANULOCYTE_CHEMOTAXIS	102	0.614334	2.2724	0.0174419	0.0302537	0.112	3595	tags=70%, list=26%, signal=93%
GOBP_SUPEROXIDE_ANION_GENERATION	GOBP_SUPEROXIDE_ANION_GENERATION	35	0.604395	2.27206	0.0162272	0.0300409	0.112	2200	tags=54%, list=16%, signal=64%
GOBP_ERK1_AND_ERK2_CASCADE	GOBP_ERK1_AND_ERK2_CASCADE	283	0.407217	2.27121	0.0202429	0.0300037	0.112	3159	tags=40%, list=23%, signal=51%
GOBP_NEGATIVE_REGULATION_OF_HEMOPOIESIS	GOBP_NEGATIVE_REGULATION_OF_HEMOPOIESIS	98	0.473455	2.26877	0.022541	0.0302483	0.118	2391	tags=38%, list=17%, signal=45%
GOBP_HETEROTYPIC_CELL_CELL_ADHESION	GOBP_HETEROTYPIC_CELL_CELL_ADHESION	41	0.567199	2.26834	0.0102041	0.0300557	0.118	3025	tags=56%, list=22%, signal=71%
GOBP_ACTIVATED_T_CELL_PROLIFERATION	GOBP_ACTIVATED_T_CELL_PROLIFERATION	39	0.543481	2.26444	0.00816326	0.0304703	0.124	2581	tags=49%, list=19%, signal=60%
GOBP_REGULATED_EXOCYTOSIS	GOBP_REGULATED_EXOCYTOSIS	186	0.386663	2.26314	0.020202	0.0305118	0.124	2081	tags=29%, list=15%, signal=34%
GOBP_POSITIVE_REGULATION_OF_PROTEIN_KINASE_B_SIGNALING	GOBP_POSITIVE_REGULATION_OF_PROTEIN_KINASE_B_SIGNALING	99	0.466814	2.26086	0.0165631	0.0307581	0.132	3133	tags=47%, list=22%, signal=61%
GOBP_REGULATION_OF_VIRAL_PROCESS	GOBP_REGULATION_OF_VIRAL_PROCESS	158	0.438553	2.26048	0.0200803	0.0306351	0.132	2631	tags=38%, list=19%, signal=46%
GOBP_POSITIVE_REGULATION_OF_LEUKOCYTE_CELL_CELL_ADHESION	GOBP_POSITIVE_REGULATION_OF_LEUKOCYTE_CELL_CELL_ADHESION	223	0.436522	2.25571	0.016	0.0312046	0.135	2024	tags=33%, list=15%, signal=38%
GOBP_REGULATION_OF_GRANULOCYTE_CHEMOTAXIS	GOBP_REGULATION_OF_GRANULOCYTE_CHEMOTAXIS	52	0.627774	2.25529	0.0172745	0.0310657	0.135	3473	tags=71%, list=25%, signal=94%
GOBP_MACROPHAGE_ACTIVATION	GOBP_MACROPHAGE_ACTIVATION	85	0.496489	2.25298	0.0240964	0.0312682	0.136	1905	tags=40%, list=14%, signal=46%
GOBP_ANTIGEN_PROCESSING_AND_PRESENTATION_OF_PEPTIDE_ANTIGEN	GOBP_ANTIGEN_PROCESSING_AND_PRESENTATION_OF_PEPTIDE_ANTIGEN	53	0.551813	2.25234	0	0.0311652	0.136	2024	tags=47%, list=15%, signal=55%
GOBP_POSITIVE_REGULATION_OF_CELL_ADHESION	GOBP_POSITIVE_REGULATION_OF_CELL_ADHESION	435	0.40977	2.25123	0.0226337	0.0312259	0.141	3224	tags=40%, list=23%, signal=50%
GOBP_REGULATION_OF_LYMPHOCYTE_ACTIVATION	GOBP_REGULATION_OF_LYMPHOCYTE_ACTIVATION	427	0.398361	2.2502	0.0201207	0.0311676	0.141	3203	tags=37%, list=23%, signal=47%
GOBP_REGULATION_OF_T_CELL_MEDIATED_IMMUNITY	GOBP_REGULATION_OF_T_CELL_MEDIATED_IMMUNITY	75	0.449654	2.2499	0.0117188	0.0310065	0.141	1931	tags=35%, list=14%, signal=40%
GOBP_NEGATIVE_REGULATION_OF_RESPONSE_TO_EXTERNAL_STIMULUS	GOBP_NEGATIVE_REGULATION_OF_RESPONSE_TO_EXTERNAL_STIMULUS	328	0.407656	2.24863	0.0160966	0.0310446	0.141	2437	tags=34%, list=17%, signal=41%
GOBP_DETECTION_OF_BIOTIC_STIMULUS	GOBP_DETECTION_OF_BIOTIC_STIMULUS	30	0.726564	2.24643	0.00796813	0.0311395	0.144	1845	tags=63%, list=13%, signal=73%
GOBP_CELLULAR_RESPONSE_TO_INTERLEUKIN_1	GOBP_CELLULAR_RESPONSE_TO_INTERLEUKIN_1	67	0.489017	2.24639	0.0182186	0.030933	0.144	2349	tags=37%, list=17%, signal=45%
GOBP_ANTIGEN_RECEPTOR_MEDIATED_SIGNALING_PATHWAY	GOBP_ANTIGEN_RECEPTOR_MEDIATED_SIGNALING_PATHWAY	136	0.384432	2.24627	0.0144928	0.0307294	0.144	1971	tags=28%, list=14%, signal=32%
GOBP_POSITIVE_REGULATION_OF_LYMPHOCYTE_ACTIVATION	GOBP_POSITIVE_REGULATION_OF_LYMPHOCYTE_ACTIVATION	279	0.399109	2.24519	0.0157791	0.0306985	0.146	3124	tags=37%, list=22%, signal=47%
GOBP_SUPEROXIDE_METABOLIC_PROCESS	GOBP_SUPEROXIDE_METABOLIC_PROCESS	57	0.544281	2.24232	0.0160966	0.0310717	0.152	1476	tags=40%, list=11%, signal=45%
GOBP_LYMPHOCYTE_ACTIVATION_INVOLVED_IN_IMMUNE_RESPONSE	GOBP_LYMPHOCYTE_ACTIVATION_INVOLVED_IN_IMMUNE_RESPONSE	161	0.425532	2.24138	0.0237154	0.0310449	0.152	1988	tags=30%, list=14%, signal=34%
GOBP_NEGATIVE_REGULATION_OF_INNATE_IMMUNE_RESPONSE	GOBP_NEGATIVE_REGULATION_OF_INNATE_IMMUNE_RESPONSE	75	0.500488	2.24092	0.0177866	0.030971	0.152	2781	tags=48%, list=20%, signal=60%
GOBP_POSITIVE_REGULATION_OF_LYMPHOCYTE_MIGRATION	GOBP_POSITIVE_REGULATION_OF_LYMPHOCYTE_MIGRATION	38	0.570264	2.24088	0.0139442	0.0307738	0.152	3244	tags=58%, list=23%, signal=75%
GOBP_REGULATION_OF_BLOOD_PRESSURE	GOBP_REGULATION_OF_BLOOD_PRESSURE	149	0.449483	2.24083	0.0160321	0.0306312	0.152	1828	tags=32%, list=13%, signal=37%
GOBP_NEGATIVE_REGULATION_OF_ENDOPEPTIDASE_ACTIVITY	GOBP_NEGATIVE_REGULATION_OF_ENDOPEPTIDASE_ACTIVITY	133	0.450071	2.24024	0.0176817	0.0305625	0.152	2498	tags=40%, list=18%, signal=48%
GOBP_REGULATION_OF_NEUTROPHIL_MIGRATION	GOBP_REGULATION_OF_NEUTROPHIL_MIGRATION	49	0.640561	2.23706	0.0113208	0.0309381	0.16	2707	tags=65%, list=19%, signal=81%
GOBP_MAST_CELL_ACTIVATION	GOBP_MAST_CELL_ACTIVATION	66	0.665177	2.23589	0.0155945	0.0309583	0.161	2081	tags=61%, list=15%, signal=71%
GOBP_MYELOID_LEUKOCYTE_DIFFERENTIATION	GOBP_MYELOID_LEUKOCYTE_DIFFERENTIATION	228	0.422662	2.23192	0.0325866	0.0315611	0.161	1802	tags=31%, list=13%, signal=35%
GOBP_POSITIVE_REGULATION_OF_LEUKOCYTE_PROLIFERATION	GOBP_POSITIVE_REGULATION_OF_LEUKOCYTE_PROLIFERATION	139	0.478018	2.22887	0.0173745	0.032167	0.165	3124	tags=48%, list=22%, signal=62%
GOBP_MACROPHAGE_MIGRATION	GOBP_MACROPHAGE_MIGRATION	58	0.571534	2.22845	0.0236686	0.0320217	0.165	2922	tags=57%, list=21%, signal=72%
GOBP_HUMORAL_IMMUNE_RESPONSE	GOBP_HUMORAL_IMMUNE_RESPONSE	119	0.545624	2.22797	0.0117647	0.031926	0.165	3017	tags=55%, list=22%, signal=69%
GOBP_MUSCLE_CELL_MIGRATION	GOBP_MUSCLE_CELL_MIGRATION	122	0.459352	2.2276	0.0102459	0.0317892	0.165	3713	tags=52%, list=27%, signal=70%
GOBP_PHAGOCYTOSIS_ENGULFMENT	GOBP_PHAGOCYTOSIS_ENGULFMENT	49	0.608707	2.22616	0.0155039	0.0318436	0.166	1941	tags=51%, list=14%, signal=59%
GOBP_NEGATIVE_REGULATION_OF_LEUKOCYTE_MEDIATED_IMMUNITY	GOBP_NEGATIVE_REGULATION_OF_LEUKOCYTE_MEDIATED_IMMUNITY	53	0.560486	2.22542	0.0277778	0.0317722	0.166	2414	tags=51%, list=17%, signal=61%
GOBP_REGULATION_OF_T_CELL_ACTIVATION	GOBP_REGULATION_OF_T_CELL_ACTIVATION	311	0.392466	2.22508	0.0159046	0.0316397	0.166	3203	tags=37%, list=23%, signal=47%
GOBP_INTERLEUKIN_10_PRODUCTION	GOBP_INTERLEUKIN_10_PRODUCTION	47	0.588423	2.22214	0.0160643	0.0319301	0.167	2024	tags=47%, list=15%, signal=55%
GOBP_REGULATION_OF_B_CELL_ACTIVATION	GOBP_REGULATION_OF_B_CELL_ACTIVATION	117	0.445291	2.22045	0.0244399	0.0320868	0.168	3137	tags=43%, list=23%, signal=55%
GOBP_NEGATIVE_REGULATION_OF_LYMPHOCYTE_ACTIVATION	GOBP_NEGATIVE_REGULATION_OF_LYMPHOCYTE_ACTIVATION	135	0.481801	2.21809	0.0222672	0.032358	0.168	2419	tags=40%, list=17%, signal=48%
GOBP_POSITIVE_REGULATION_OF_PATTERN_RECOGNITION_RECEPTOR_SIGNALING_PATHWAY	GOBP_POSITIVE_REGULATION_OF_PATTERN_RECOGNITION_RECEPTOR_SIGNALING_PATHWAY	45	0.53272	2.21686	0.0160966	0.0324278	0.169	1236	tags=38%, list=9%, signal=41%
GOBP_NEUROINFLAMMATORY_RESPONSE	GOBP_NEUROINFLAMMATORY_RESPONSE	63	0.546084	2.21518	0.03125	0.0326525	0.171	3119	tags=56%, list=22%, signal=71%
GOBP_LEUKOTRIENE_METABOLIC_PROCESS	GOBP_LEUKOTRIENE_METABOLIC_PROCESS	18	0.756438	2.21436	0.00813008	0.0326398	0.171	1004	tags=61%, list=7%, signal=66%
GOBP_NEGATIVE_REGULATION_OF_ENDOTHELIAL_CELL_PROLIFERATION	GOBP_NEGATIVE_REGULATION_OF_ENDOTHELIAL_CELL_PROLIFERATION	38	0.528155	2.21393	0	0.0325419	0.171	3558	tags=66%, list=26%, signal=88%
GOBP_REGULATION_OF_T_CELL_CYTOKINE_PRODUCTION	GOBP_REGULATION_OF_T_CELL_CYTOKINE_PRODUCTION	28	0.54068	2.21374	0.00976562	0.032389	0.171	1644	tags=39%, list=12%, signal=44%
GOBP_RESPONSE_TO_INTERLEUKIN_1	GOBP_RESPONSE_TO_INTERLEUKIN_1	80	0.44376	2.21249	0.012024	0.0324352	0.171	3473	tags=43%, list=25%, signal=56%
GOBP_CALCIUM_MEDIATED_SIGNALING	GOBP_CALCIUM_MEDIATED_SIGNALING	136	0.435433	2.212	0.0199203	0.032312	0.171	2675	tags=40%, list=19%, signal=50%
GOBP_HOMOTYPIC_CELL_CELL_ADHESION	GOBP_HOMOTYPIC_CELL_CELL_ADHESION	72	0.497311	2.21108	0.0206612	0.032279	0.171	1971	tags=38%, list=14%, signal=43%
GOBP_REGULATION_OF_ANTIGEN_PROCESSING_AND_PRESENTATION	GOBP_REGULATION_OF_ANTIGEN_PROCESSING_AND_PRESENTATION	18	0.702098	2.21022	0.0038835	0.0322874	0.171	2707	tags=72%, list=19%, signal=90%
GOBP_NEUTROPHIL_MIGRATION	GOBP_NEUTROPHIL_MIGRATION	103	0.620193	2.20786	0.0155039	0.0326442	0.173	2396	tags=57%, list=17%, signal=69%
GOBP_REGULATION_OF_MACROPHAGE_MIGRATION	GOBP_REGULATION_OF_MACROPHAGE_MIGRATION	42	0.602022	2.20762	0.0159363	0.032505	0.173	2922	tags=60%, list=21%, signal=75%
GOBP_NATURAL_KILLER_CELL_MEDIATED_IMMUNITY	GOBP_NATURAL_KILLER_CELL_MEDIATED_IMMUNITY	53	0.519085	2.20641	0.00795229	0.0326151	0.173	1988	tags=42%, list=14%, signal=48%
GOBP_T_CELL_CYTOKINE_PRODUCTION	GOBP_T_CELL_CYTOKINE_PRODUCTION	37	0.507911	2.20332	0.013834	0.0330562	0.177	1644	tags=38%, list=12%, signal=43%
GOBP_ANTIGEN_PROCESSING_AND_PRESENTATION	GOBP_ANTIGEN_PROCESSING_AND_PRESENTATION	92	0.493702	2.19974	0.011583	0.0335995	0.183	2024	tags=42%, list=15%, signal=49%
GOBP_CELL_RECOGNITION	GOBP_CELL_RECOGNITION	102	0.42848	2.19696	0.0142566	0.03412	0.187	2707	tags=38%, list=19%, signal=47%
GOBP_MEMBRANE_INVAGINATION	GOBP_MEMBRANE_INVAGINATION	66	0.490915	2.19654	0.0175097	0.034043	0.187	3470	tags=52%, list=25%, signal=68%
GOBP_NEGATIVE_REGULATION_OF_CELL_CELL_ADHESION	GOBP_NEGATIVE_REGULATION_OF_CELL_CELL_ADHESION	170	0.417585	2.19535	0.0303644	0.0342141	0.19	3623	tags=45%, list=26%, signal=60%
GOBP_REGULATION_OF_CELL_CELL_ADHESION	GOBP_REGULATION_OF_CELL_CELL_ADHESION	408	0.395383	2.19408	0.0204082	0.0343135	0.192	3972	tags=44%, list=29%, signal=59%
GOBP_TOLL_LIKE_RECEPTOR_2_SIGNALING_PATHWAY	GOBP_TOLL_LIKE_RECEPTOR_2_SIGNALING_PATHWAY	16	0.661792	2.19398	0.0138614	0.0341558	0.192	655	tags=44%, list=5%, signal=46%
GOBP_REGULATION_OF_PEPTIDYL_TYROSINE_PHOSPHORYLATION	GOBP_REGULATION_OF_PEPTIDYL_TYROSINE_PHOSPHORYLATION	223	0.403426	2.19387	0.0205339	0.0340188	0.192	2070	tags=31%, list=15%, signal=36%
GOBP_RESPONSE_TO_FUNGUS	GOBP_RESPONSE_TO_FUNGUS	43	0.630431	2.19305	0.0276134	0.0340863	0.192	2567	tags=63%, list=18%, signal=77%
GOBP_TYPE_II_INTERFERON_PRODUCTION	GOBP_TYPE_II_INTERFERON_PRODUCTION	99	0.500104	2.19121	0.0160643	0.0343143	0.193	2189	tags=39%, list=16%, signal=46%
GOBP_SMOOTH_MUSCLE_CELL_MIGRATION	GOBP_SMOOTH_MUSCLE_CELL_MIGRATION	107	0.470609	2.19062	0.0202429	0.0342717	0.194	3713	tags=53%, list=27%, signal=72%
GOBP_POSITIVE_REGULATION_OF_MAPK_CASCADE	GOBP_POSITIVE_REGULATION_OF_MAPK_CASCADE	429	0.383319	2.18934	0.0565657	0.0341715	0.197	3153	tags=38%, list=23%, signal=47%
GOBP_LIPOPOLYSACCHARIDE_MEDIATED_SIGNALING_PATHWAY	GOBP_LIPOPOLYSACCHARIDE_MEDIATED_SIGNALING_PATHWAY	57	0.540394	2.18938	0.0178218	0.0343452	0.197	3581	tags=61%, list=26%, signal=82%
GOBP_APOPTOTIC_CELL_CLEARANCE	GOBP_APOPTOTIC_CELL_CLEARANCE	38	0.531825	2.18746	0.011811	0.0343519	0.198	3169	tags=58%, list=23%, signal=75%
GOBP_WOUND_HEALING	GOBP_WOUND_HEALING	326	0.4089	2.18706	0.0164271	0.0342874	0.198	3155	tags=40%, list=23%, signal=50%
GOBP_CYTOSOLIC_PATTERN_RECOGNITION_RECEPTOR_SIGNALING_PATHWAY	GOBP_CYTOSOLIC_PATTERN_RECOGNITION_RECEPTOR_SIGNALING_PATHWAY	87	0.455862	2.18611	0.0178926	0.0343385	0.201	3086	tags=44%, list=22%, signal=56%
GOBP_POSITIVE_REGULATION_OF_RESPONSE_TO_WOUNDING	GOBP_POSITIVE_REGULATION_OF_RESPONSE_TO_WOUNDING	66	0.476188	2.18286	0.0159681	0.0348011	0.206	3221	tags=50%, list=23%, signal=65%
GOBP_MONOCYTE_CHEMOTACTIC_PROTEIN_1_PRODUCTION	GOBP_MONOCYTE_CHEMOTACTIC_PROTEIN_1_PRODUCTION	24	0.597005	2.18209	0.0116959	0.0348185	0.206	2675	tags=58%, list=19%, signal=72%
GOBP_MACROPHAGE_CHEMOTAXIS	GOBP_MACROPHAGE_CHEMOTAXIS	38	0.585955	2.18197	0.0218688	0.0347234	0.206	2922	tags=58%, list=21%, signal=73%
GOBP_REGULATION_OF_REGULATED_SECRETORY_PATHWAY	GOBP_REGULATION_OF_REGULATED_SECRETORY_PATHWAY	114	0.388141	2.1807	0.0245399	0.0348568	0.209	2200	tags=32%, list=16%, signal=37%
GOBP_POSITIVE_CHEMOTAXIS	GOBP_POSITIVE_CHEMOTAXIS	41	0.563082	2.18058	0.0123967	0.0347171	0.209	1262	tags=37%, list=9%, signal=40%
GOBP_REGULATION_OF_LEUKOCYTE_DIFFERENTIATION	GOBP_REGULATION_OF_LEUKOCYTE_DIFFERENTIATION	290	0.403692	2.17995	0.0167364	0.0346827	0.21	2391	tags=31%, list=17%, signal=37%
GOBP_NEGATIVE_REGULATION_OF_ADAPTIVE_IMMUNE_RESPONSE	GOBP_NEGATIVE_REGULATION_OF_ADAPTIVE_IMMUNE_RESPONSE	40	0.568947	2.17933	0.0291829	0.0347058	0.21	1971	tags=45%, list=14%, signal=52%
GOBP_PEPTIDYL_TYROSINE_MODIFICATION	GOBP_PEPTIDYL_TYROSINE_MODIFICATION	272	0.399178	2.17859	0.0227273	0.0347132	0.214	2070	tags=31%, list=15%, signal=36%
GOBP_REGULATION_OF_VASCULAR_PERMEABILITY	GOBP_REGULATION_OF_VASCULAR_PERMEABILITY	41	0.591553	2.17655	0.00826446	0.0349494	0.216	2488	tags=54%, list=18%, signal=65%
GOBP_NEGATIVE_REGULATION_OF_DEFENSE_RESPONSE	GOBP_NEGATIVE_REGULATION_OF_DEFENSE_RESPONSE	206	0.400175	2.17619	0.0176817	0.0348699	0.216	1895	tags=31%, list=14%, signal=35%
GOBP_POSITIVE_REGULATION_OF_CELL_CELL_ADHESION	GOBP_POSITIVE_REGULATION_OF_CELL_CELL_ADHESION	266	0.424758	2.17517	0.0262097	0.0349167	0.216	2024	tags=31%, list=15%, signal=36%
GOBP_MONOCYTE_CHEMOTAXIS	GOBP_MONOCYTE_CHEMOTAXIS	45	0.659359	2.17413	0.016	0.0349455	0.218	1262	tags=51%, list=9%, signal=56%
GOBP_POSITIVE_REGULATION_OF_I_KAPPAB_KINASE_NF_KAPPAB_SIGNALING	GOBP_POSITIVE_REGULATION_OF_I_KAPPAB_KINASE_NF_KAPPAB_SIGNALING	117	0.407413	2.17032	0.015625	0.0356241	0.219	2756	tags=38%, list=20%, signal=46%
GOBP_NEGATIVE_REGULATION_OF_VIRAL_PROCESS	GOBP_NEGATIVE_REGULATION_OF_VIRAL_PROCESS	91	0.554197	2.17031	0.0266393	0.0354584	0.219	2631	tags=49%, list=19%, signal=61%
GOBP_OSTEOCLAST_DIFFERENTIATION	GOBP_OSTEOCLAST_DIFFERENTIATION	103	0.486045	2.16895	0.0184426	0.035669	0.226	1791	tags=36%, list=13%, signal=41%
GOBP_NEGATIVE_REGULATION_OF_LEUKOCYTE_CELL_CELL_ADHESION	GOBP_NEGATIVE_REGULATION_OF_LEUKOCYTE_CELL_CELL_ADHESION	118	0.445282	2.16859	0.0184805	0.0355619	0.227	3960	tags=49%, list=28%, signal=68%
GOBP_POSITIVE_REGULATION_OF_ENDOTHELIAL_CELL_PROLIFERATION	GOBP_POSITIVE_REGULATION_OF_ENDOTHELIAL_CELL_PROLIFERATION	89	0.469115	2.16533	0.032	0.0361527	0.229	3462	tags=49%, list=25%, signal=65%
GOBP_POSITIVE_REGULATION_OF_OSTEOCLAST_DIFFERENTIATION	GOBP_POSITIVE_REGULATION_OF_OSTEOCLAST_DIFFERENTIATION	27	0.619955	2.16478	0.00400802	0.0361369	0.229	1696	tags=52%, list=12%, signal=59%
GOBP_CELLULAR_RESPONSE_TO_AMYLOID_BETA	GOBP_CELLULAR_RESPONSE_TO_AMYLOID_BETA	31	0.566415	2.16466	0.0160321	0.0360099	0.229	2217	tags=52%, list=16%, signal=61%
GOBP_NEGATIVE_REGULATION_OF_WOUND_HEALING	GOBP_NEGATIVE_REGULATION_OF_WOUND_HEALING	54	0.490984	2.16323	0.0204918	0.0361251	0.229	1905	tags=41%, list=14%, signal=47%
GOBP_NEGATIVE_REGULATION_OF_EPITHELIAL_CELL_MIGRATION	GOBP_NEGATIVE_REGULATION_OF_EPITHELIAL_CELL_MIGRATION	62	0.483874	2.16195	0.00811359	0.0363329	0.23	3017	tags=47%, list=22%, signal=59%
GOBP_REGULATION_OF_WOUND_HEALING	GOBP_REGULATION_OF_WOUND_HEALING	106	0.448454	2.15771	0.0161616	0.0373879	0.232	3221	tags=47%, list=23%, signal=61%
GOBP_NEGATIVE_REGULATION_OF_LEUKOCYTE_PROLIFERATION	GOBP_NEGATIVE_REGULATION_OF_LEUKOCYTE_PROLIFERATION	77	0.485957	2.15636	0.0365854	0.0375591	0.233	1988	tags=36%, list=14%, signal=42%
GOBP_NEGATIVE_REGULATION_OF_B_CELL_ACTIVATION	GOBP_NEGATIVE_REGULATION_OF_B_CELL_ACTIVATION	31	0.566126	2.15575	0.0174081	0.0375809	0.236	2178	tags=48%, list=16%, signal=57%
GOBP_REGULATION_OF_NITRIC_OXIDE_METABOLIC_PROCESS	GOBP_REGULATION_OF_NITRIC_OXIDE_METABOLIC_PROCESS	61	0.478103	2.15573	0.0273973	0.0374235	0.236	3482	tags=54%, list=25%, signal=72%
GOBP_VASCULAR_PROCESS_IN_CIRCULATORY_SYSTEM	GOBP_VASCULAR_PROCESS_IN_CIRCULATORY_SYSTEM	192	0.418101	2.14933	0.0335968	0.0389429	0.238	3530	tags=43%, list=25%, signal=57%
GOBP_RESPONSE_TO_WOUNDING	GOBP_RESPONSE_TO_WOUNDING	425	0.386347	2.14875	0.0226337	0.0388949	0.242	3155	tags=38%, list=23%, signal=47%
GOBP_NEUTROPHIL_HOMEOSTASIS	GOBP_NEUTROPHIL_HOMEOSTASIS	28	0.616784	2.14825	0.022449	0.0388483	0.242	2189	tags=57%, list=16%, signal=68%
GOBP_DEFENSE_RESPONSE_TO_FUNGUS	GOBP_DEFENSE_RESPONSE_TO_FUNGUS	32	0.619427	2.14741	0.0273973	0.0388667	0.242	1131	tags=47%, list=8%, signal=51%
GOBP_REGULATION_OF_COLLAGEN_METABOLIC_PROCESS	GOBP_REGULATION_OF_COLLAGEN_METABOLIC_PROCESS	53	0.535207	2.14741	0	0.0386984	0.242	3359	tags=55%, list=24%, signal=72%
GOBP_REGULATION_OF_CELL_KILLING	GOBP_REGULATION_OF_CELL_KILLING	89	0.490664	2.14595	0.019084	0.0388943	0.242	1988	tags=40%, list=14%, signal=47%
GOBP_NEGATIVE_REGULATION_OF_INTERLEUKIN_6_PRODUCTION	GOBP_NEGATIVE_REGULATION_OF_INTERLEUKIN_6_PRODUCTION	43	0.638957	2.14552	0.0214425	0.0388527	0.242	2781	tags=67%, list=20%, signal=84%
GOBP_VASCULAR_ENDOTHELIAL_GROWTH_FACTOR_RECEPTOR_SIGNALING_PATHWAY	GOBP_VASCULAR_ENDOTHELIAL_GROWTH_FACTOR_RECEPTOR_SIGNALING_PATHWAY	46	0.537964	2.14493	0.0288066	0.0388107	0.242	1849	tags=43%, list=13%, signal=50%
GOBP_PLATELET_AGGREGATION	GOBP_PLATELET_AGGREGATION	49	0.550163	2.14438	0.0307377	0.0387403	0.243	1971	tags=45%, list=14%, signal=52%
GOBP_COLLAGEN_CATABOLIC_PROCESS	GOBP_COLLAGEN_CATABOLIC_PROCESS	30	0.658271	2.14435	0.0215686	0.0385763	0.243	3563	tags=73%, list=26%, signal=98%
GOBP_MONONUCLEAR_CELL_DIFFERENTIATION	GOBP_MONONUCLEAR_CELL_DIFFERENTIATION	410	0.37069	2.14396	0.026694	0.0385134	0.247	1988	tags=26%, list=14%, signal=29%
GOBP_POSITIVE_REGULATION_OF_HEMOPOIESIS	GOBP_POSITIVE_REGULATION_OF_HEMOPOIESIS	171	0.396304	2.14367	0.0180723	0.0384556	0.247	2205	tags=30%, list=16%, signal=35%
GOBP_POSITIVE_REGULATION_OF_INTERFERON_BETA_PRODUCTION	GOBP_POSITIVE_REGULATION_OF_INTERFERON_BETA_PRODUCTION	46	0.510385	2.1426	0.0200401	0.0386009	0.25	2728	tags=48%, list=20%, signal=59%
GOBP_REGULATION_OF_B_CELL_MEDIATED_IMMUNITY	GOBP_REGULATION_OF_B_CELL_MEDIATED_IMMUNITY	52	0.44979	2.14223	0.0160321	0.038526	0.25	1988	tags=33%, list=14%, signal=38%
GOBP_NEGATIVE_REGULATION_OF_CYTOKINE_PRODUCTION_INVOLVED_IN_INFLAMMATORY_RESPONSE	GOBP_NEGATIVE_REGULATION_OF_CYTOKINE_PRODUCTION_INVOLVED_IN_INFLAMMATORY_RESPONSE	20	0.609229	2.14218	0.00823045	0.0383925	0.25	2338	tags=55%, list=17%, signal=66%
GOBP_REGULATION_OF_PEPTIDASE_ACTIVITY	GOBP_REGULATION_OF_PEPTIDASE_ACTIVITY	330	0.385868	2.14148	0.0121951	0.0384474	0.25	3778	tags=44%, list=27%, signal=59%
GOBP_CYTOKINE_PRODUCTION_INVOLVED_IN_INFLAMMATORY_RESPONSE	GOBP_CYTOKINE_PRODUCTION_INVOLVED_IN_INFLAMMATORY_RESPONSE	52	0.45283	2.14145	0.0244399	0.0382979	0.25	2338	tags=40%, list=17%, signal=48%
GOBP_REGULATION_OF_B_CELL_PROLIFERATION	GOBP_REGULATION_OF_B_CELL_PROLIFERATION	55	0.534983	2.14077	0.0223577	0.0382511	0.25	597	tags=31%, list=4%, signal=32%
GOBP_POSITIVE_REGULATION_OF_TYPE_I_INTERFERON_PRODUCTION	GOBP_POSITIVE_REGULATION_OF_TYPE_I_INTERFERON_PRODUCTION	69	0.463872	2.13946	0.019802	0.0384394	0.25	2522	tags=41%, list=18%, signal=49%
GOBP_POSITIVE_REGULATION_OF_MYELOID_LEUKOCYTE_DIFFERENTIATION	GOBP_POSITIVE_REGULATION_OF_MYELOID_LEUKOCYTE_DIFFERENTIATION	57	0.473307	2.13919	0.0214425	0.0383509	0.25	1696	tags=37%, list=12%, signal=42%
GOBP_ENDOLYSOSOMAL_TOLL_LIKE_RECEPTOR_SIGNALING_PATHWAY	GOBP_ENDOLYSOSOMAL_TOLL_LIKE_RECEPTOR_SIGNALING_PATHWAY	38	0.575443	2.13754	0.0214844	0.0385087	0.25	3086	tags=58%, list=22%, signal=74%
GOBP_ENDOTHELIAL_CELL_MIGRATION	GOBP_ENDOTHELIAL_CELL_MIGRATION	207	0.447679	2.13688	0.0207039	0.0385387	0.25	3558	tags=48%, list=26%, signal=64%
GOBP_NEGATIVE_REGULATION_OF_VIRAL_GENOME_REPLICATION	GOBP_NEGATIVE_REGULATION_OF_VIRAL_GENOME_REPLICATION	52	0.649631	2.1368	0.0199203	0.0384089	0.25	2446	tags=60%, list=18%, signal=72%
GOBP_NEGATIVE_REGULATION_OF_MYELOID_LEUKOCYTE_DIFFERENTIATION	GOBP_NEGATIVE_REGULATION_OF_MYELOID_LEUKOCYTE_DIFFERENTIATION	50	0.536035	2.13675	0.029106	0.038264	0.25	1791	tags=40%, list=13%, signal=46%
GOBP_AMEBOIDAL_TYPE_CELL_MIGRATION	GOBP_AMEBOIDAL_TYPE_CELL_MIGRATION	417	0.413385	2.13546	0.0224949	0.0384103	0.25	3558	tags=44%, list=26%, signal=57%
GOBP_REGULATION_OF_MAST_CELL_ACTIVATION	GOBP_REGULATION_OF_MAST_CELL_ACTIVATION	42	0.660444	2.13545	0.0196464	0.0382582	0.25	2081	tags=62%, list=15%, signal=73%
GOBP_ENDOCARDIAL_CUSHION_MORPHOGENESIS	GOBP_ENDOCARDIAL_CUSHION_MORPHOGENESIS	38	0.542569	2.13471	0	0.0382283	0.25	2795	tags=47%, list=20%, signal=59%
GOBP_TYROSINE_PHOSPHORYLATION_OF_STAT_PROTEIN	GOBP_TYROSINE_PHOSPHORYLATION_OF_STAT_PROTEIN	53	0.45988	2.13406	0.00414938	0.0382538	0.25	1801	tags=34%, list=13%, signal=39%
GOBP_CELL_KILLING	GOBP_CELL_KILLING	150	0.484062	2.13385	0.0157791	0.0381683	0.25	2414	tags=43%, list=17%, signal=51%
GOBP_PROTEIN_PROCESSING	GOBP_PROTEIN_PROCESSING	212	0.396933	2.13379	0.00814664	0.0380559	0.25	5151	tags=58%, list=37%, signal=91%
GOBP_POSITIVE_REGULATION_OF_WOUND_HEALING	GOBP_POSITIVE_REGULATION_OF_WOUND_HEALING	50	0.49218	2.12956	0.0179283	0.0389569	0.251	3221	tags=52%, list=23%, signal=67%
GOBP_NEGATIVE_REGULATION_OF_COAGULATION	GOBP_NEGATIVE_REGULATION_OF_COAGULATION	35	0.599768	2.12882	0.0225873	0.0389122	0.251	1905	tags=54%, list=14%, signal=63%
GOBP_NEGATIVE_REGULATION_OF_LYMPHOCYTE_MEDIATED_IMMUNITY	GOBP_NEGATIVE_REGULATION_OF_LYMPHOCYTE_MEDIATED_IMMUNITY	41	0.542601	2.12879	0.0178571	0.0387783	0.251	1988	tags=46%, list=14%, signal=54%
GOBP_REGULATION_OF_SENSORY_PERCEPTION	GOBP_REGULATION_OF_SENSORY_PERCEPTION	35	0.558424	2.12868	0.01	0.0386773	0.253	1266	tags=37%, list=9%, signal=41%
GOBP_NEGATIVE_REGULATION_OF_ENDOTHELIAL_CELL_MIGRATION	GOBP_NEGATIVE_REGULATION_OF_ENDOTHELIAL_CELL_MIGRATION	47	0.50455	2.12711	0.00808081	0.0388931	0.253	2441	tags=45%, list=18%, signal=54%
GOBP_INTERFERON_ALPHA_PRODUCTION	GOBP_INTERFERON_ALPHA_PRODUCTION	33	0.558322	2.12659	0.00767754	0.0388776	0.253	2522	tags=52%, list=18%, signal=63%
GOBP_CARBOHYDRATE_DERIVATIVE_CATABOLIC_PROCESS	GOBP_CARBOHYDRATE_DERIVATIVE_CATABOLIC_PROCESS	134	0.4653	2.12315	0.0181087	0.0395727	0.254	3359	tags=53%, list=24%, signal=69%
GOBP_POSITIVE_REGULATION_OF_MYELOID_CELL_DIFFERENTIATION	GOBP_POSITIVE_REGULATION_OF_MYELOID_CELL_DIFFERENTIATION	95	0.403019	2.12314	0.0164271	0.0394435	0.254	1696	tags=28%, list=12%, signal=32%
GOBP_POSITIVE_REGULATION_OF_MYELOID_LEUKOCYTE_MEDIATED_IMMUNITY	GOBP_POSITIVE_REGULATION_OF_MYELOID_LEUKOCYTE_MEDIATED_IMMUNITY	21	0.704666	2.12283	0.0177165	0.0393539	0.254	1239	tags=57%, list=9%, signal=63%
GOBP_T_CELL_ACTIVATION_INVOLVED_IN_IMMUNE_RESPONSE	GOBP_T_CELL_ACTIVATION_INVOLVED_IN_IMMUNE_RESPONSE	82	0.480285	2.12271	0.0221328	0.0392103	0.254	1988	tags=34%, list=14%, signal=40%
GOBP_NEGATIVE_REGULATION_OF_TRANSPORTER_ACTIVITY	GOBP_NEGATIVE_REGULATION_OF_TRANSPORTER_ACTIVITY	72	0.435865	2.12148	0.00984252	0.0393275	0.254	3389	tags=50%, list=24%, signal=66%
GOBP_REGULATION_OF_MACROPHAGE_ACTIVATION	GOBP_REGULATION_OF_MACROPHAGE_ACTIVATION	43	0.481691	2.12032	0.0238095	0.0394803	0.256	2684	tags=44%, list=19%, signal=55%
GOBP_HEART_TRABECULA_MORPHOGENESIS	GOBP_HEART_TRABECULA_MORPHOGENESIS	34	0.531435	2.11963	0.00833333	0.0394918	0.258	2795	tags=47%, list=20%, signal=59%
GOBP_REGULATION_OF_MACROPHAGE_CHEMOTAXIS	GOBP_REGULATION_OF_MACROPHAGE_CHEMOTAXIS	27	0.613417	2.1184	0.015873	0.0397067	0.26	2922	tags=59%, list=21%, signal=75%
GOBP_REGULATION_OF_ACTIVATED_T_CELL_PROLIFERATION	GOBP_REGULATION_OF_ACTIVATED_T_CELL_PROLIFERATION	31	0.490435	2.11833	0.00798403	0.0396019	0.26	2581	tags=45%, list=19%, signal=55%
GOBP_SPROUTING_ANGIOGENESIS	GOBP_SPROUTING_ANGIOGENESIS	117	0.44785	2.11753	0.0308642	0.0396456	0.26	2523	tags=39%, list=18%, signal=48%
GOBP_POSITIVE_REGULATION_OF_PEPTIDYL_TYROSINE_PHOSPHORYLATION	GOBP_POSITIVE_REGULATION_OF_PEPTIDYL_TYROSINE_PHOSPHORYLATION	155	0.426935	2.11729	0.0227273	0.0395823	0.26	2070	tags=34%, list=15%, signal=39%
GOBP_NEGATIVE_REGULATION_OF_LOCOMOTION	GOBP_NEGATIVE_REGULATION_OF_LOCOMOTION	312	0.382017	2.11671	0.0263158	0.0395876	0.26	3169	tags=38%, list=23%, signal=48%
GOBP_NEGATIVE_REGULATION_OF_MYELOID_CELL_APOPTOTIC_PROCESS	GOBP_NEGATIVE_REGULATION_OF_MYELOID_CELL_APOPTOTIC_PROCESS	19	0.574442	2.11621	0.01	0.039529	0.26	985	tags=37%, list=7%, signal=40%
GOBP_GLIAL_CELL_ACTIVATION	GOBP_GLIAL_CELL_ACTIVATION	46	0.573422	2.11617	0.0313725	0.0393936	0.26	2684	tags=57%, list=19%, signal=70%
GOBP_B_CELL_ACTIVATION	GOBP_B_CELL_ACTIVATION	226	0.394113	2.11529	0.0323232	0.0393836	0.26	1988	tags=30%, list=14%, signal=34%
GOBP_NEGATIVE_REGULATION_OF_CELL_ADHESION	GOBP_NEGATIVE_REGULATION_OF_CELL_ADHESION	262	0.397345	2.11415	0.045082	0.0396417	0.261	3623	tags=43%, list=26%, signal=57%
GOBP_TYPE_I_INTERFERON_PRODUCTION	GOBP_TYPE_I_INTERFERON_PRODUCTION	109	0.424954	2.11413	0.0183299	0.0395002	0.261	2522	tags=37%, list=18%, signal=44%
GOBP_REGULATION_OF_MYELOID_CELL_DIFFERENTIATION	GOBP_REGULATION_OF_MYELOID_CELL_DIFFERENTIATION	196	0.385215	2.113	0.0231579	0.0396708	0.263	1791	tags=27%, list=13%, signal=30%
GOBP_REGULATION_OF_SYSTEMIC_ARTERIAL_BLOOD_PRESSURE	GOBP_REGULATION_OF_SYSTEMIC_ARTERIAL_BLOOD_PRESSURE	79	0.487387	2.10974	0.00790514	0.0405137	0.268	1828	tags=35%, list=13%, signal=41%
GOBP_NEGATIVE_REGULATION_OF_B_CELL_PROLIFERATION	GOBP_NEGATIVE_REGULATION_OF_B_CELL_PROLIFERATION	16	0.666066	2.10899	0.0156863	0.0405475	0.27	448	tags=44%, list=3%, signal=45%
GOBP_POSITIVE_REGULATION_OF_CELLULAR_EXTRAVASATION	GOBP_POSITIVE_REGULATION_OF_CELLULAR_EXTRAVASATION	21	0.700343	2.10799	0.0238095	0.040611	0.27	2661	tags=71%, list=19%, signal=88%
GOBP_NEGATIVE_REGULATION_OF_HYDROLASE_ACTIVITY	GOBP_NEGATIVE_REGULATION_OF_HYDROLASE_ACTIVITY	259	0.372683	2.10615	0.00806452	0.0409119	0.275	2438	tags=31%, list=17%, signal=37%
GOBP_REGULATION_OF_ENDOTHELIAL_CELL_MIGRATION	GOBP_REGULATION_OF_ENDOTHELIAL_CELL_MIGRATION	159	0.445606	2.10607	0.0224949	0.0408024	0.275	3181	tags=45%, list=23%, signal=57%
GOBP_POSITIVE_REGULATION_OF_MACROPHAGE_ACTIVATION	GOBP_POSITIVE_REGULATION_OF_MACROPHAGE_ACTIVATION	22	0.618809	2.10513	0.0156556	0.0408967	0.276	1905	tags=55%, list=14%, signal=63%
GOBP_REGULATION_OF_RESPONSE_TO_WOUNDING	GOBP_REGULATION_OF_RESPONSE_TO_WOUNDING	141	0.408893	2.10492	0.0223577	0.0407867	0.276	3221	tags=43%, list=23%, signal=55%
GOBP_POSITIVE_REGULATION_OF_NEUTROPHIL_MIGRATION	GOBP_POSITIVE_REGULATION_OF_NEUTROPHIL_MIGRATION	39	0.593258	2.10175	0.0150943	0.0414905	0.281	2707	tags=59%, list=19%, signal=73%
GOBP_POSITIVE_REGULATION_OF_ALPHA_BETA_T_CELL_DIFFERENTIATION	GOBP_POSITIVE_REGULATION_OF_ALPHA_BETA_T_CELL_DIFFERENTIATION	41	0.523782	2.09987	0.0136719	0.0418832	0.286	1172	tags=32%, list=8%, signal=35%
GOBP_EXTERNAL_ENCAPSULATING_STRUCTURE_ORGANIZATION	GOBP_EXTERNAL_ENCAPSULATING_STRUCTURE_ORGANIZATION	264	0.449797	2.09916	0.0691057	0.0417747	0.287	3595	tags=51%, list=26%, signal=67%
GOBP_MYELOID_LEUKOCYTE_CYTOKINE_PRODUCTION	GOBP_MYELOID_LEUKOCYTE_CYTOKINE_PRODUCTION	61	0.490001	2.09967	0.0205761	0.0417903	0.286	4505	tags=64%, list=32%, signal=94%
GOBP_VACUOLAR_LOCALIZATION	GOBP_VACUOLAR_LOCALIZATION	77	0.392657	2.0988	0.0118812	0.0417322	0.287	1659	tags=27%, list=12%, signal=31%
GOBP_REGULATION_OF_CALCIUM_ION_TRANSPORT	GOBP_REGULATION_OF_CALCIUM_ION_TRANSPORT	226	0.391439	2.09869	0.0337972	0.041622	0.287	3412	tags=46%, list=24%, signal=59%
GOBP_G_PROTEIN_COUPLED_RECEPTOR_SIGNALING_PATHWAY	GOBP_G_PROTEIN_COUPLED_RECEPTOR_SIGNALING_PATHWAY	455	0.440353	2.09854	0.0180723	0.0415493	0.287	2547	tags=37%, list=18%, signal=43%
GOBP_POSITIVE_REGULATION_OF_PHOSPHATIDYLINOSITOL_3_KINASE_SIGNALING	GOBP_POSITIVE_REGULATION_OF_PHOSPHATIDYLINOSITOL_3_KINASE_SIGNALING	71	0.488927	2.0981	0.0300601	0.0415473	0.287	1971	tags=38%, list=14%, signal=44%
GOBP_NEGATIVE_REGULATION_OF_CHEMOTAXIS	GOBP_NEGATIVE_REGULATION_OF_CHEMOTAXIS	54	0.554158	2.09575	0.0102669	0.041993	0.291	2376	tags=46%, list=17%, signal=56%
GOBP_REGULATION_OF_PHOSPHATIDYLINOSITOL_3_KINASE_SIGNALING	GOBP_REGULATION_OF_PHOSPHATIDYLINOSITOL_3_KINASE_SIGNALING	94	0.456164	2.09447	0.0221774	0.0422298	0.293	2969	tags=41%, list=21%, signal=52%
GOBP_CHEMOKINE_C_X_C_MOTIF_LIGAND_2_PRODUCTION	GOBP_CHEMOKINE_C_X_C_MOTIF_LIGAND_2_PRODUCTION	23	0.567328	2.09386	0.0119048	0.0421986	0.293	2379	tags=52%, list=17%, signal=63%
GOBP_REGULATION_OF_CELLULAR_EXTRAVASATION	GOBP_REGULATION_OF_CELLULAR_EXTRAVASATION	39	0.659692	2.0931	0.0193798	0.042344	0.295	2661	tags=64%, list=19%, signal=79%
GOBP_IMMUNOGLOBULIN_PRODUCTION	GOBP_IMMUNOGLOBULIN_PRODUCTION	112	0.401075	2.09308	0.0161616	0.0422034	0.295	1988	tags=29%, list=14%, signal=34%
GOBP_LYMPHOCYTE_CHEMOTAXIS	GOBP_LYMPHOCYTE_CHEMOTAXIS	45	0.596624	2.09228	0.0118343	0.0422793	0.295	715	tags=36%, list=5%, signal=37%
GOBP_REGULATION_OF_VASCULAR_ENDOTHELIAL_GROWTH_FACTOR_RECEPTOR_SIGNALING_PATHWAY	GOBP_REGULATION_OF_VASCULAR_ENDOTHELIAL_GROWTH_FACTOR_RECEPTOR_SIGNALING_PATHWAY	29	0.552805	2.09149	0.0181087	0.0423433	0.297	1849	tags=45%, list=13%, signal=52%
GOBP_REGULATION_OF_LEUKOCYTE_ADHESION_TO_VASCULAR_ENDOTHELIAL_CELL	GOBP_REGULATION_OF_LEUKOCYTE_ADHESION_TO_VASCULAR_ENDOTHELIAL_CELL	28	0.607417	2.08881	0.0273973	0.0428228	0.297	1485	tags=46%, list=11%, signal=52%
GOBP_NEGATIVE_REGULATION_OF_CATION_CHANNEL_ACTIVITY	GOBP_NEGATIVE_REGULATION_OF_CATION_CHANNEL_ACTIVITY	35	0.522453	2.08733	0.00959693	0.043093	0.297	3377	tags=60%, list=24%, signal=79%
GOBP_POSITIVE_REGULATION_OF_RESPONSE_TO_CYTOKINE_STIMULUS	GOBP_POSITIVE_REGULATION_OF_RESPONSE_TO_CYTOKINE_STIMULUS	57	0.49669	2.08688	0.0246914	0.0430791	0.297	2506	tags=44%, list=18%, signal=53%
GOBP_MONOCYTE_DIFFERENTIATION	GOBP_MONOCYTE_DIFFERENTIATION	35	0.527704	2.08681	0.0386179	0.0429655	0.299	2400	tags=46%, list=17%, signal=55%
GOBP_NEGATIVE_REGULATION_OF_BLOOD_PRESSURE	GOBP_NEGATIVE_REGULATION_OF_BLOOD_PRESSURE	44	0.52344	2.08638	0.00398406	0.0429336	0.3	1828	tags=36%, list=13%, signal=42%
GOBP_REGULATION_OF_MONOCYTE_CHEMOTAXIS	GOBP_REGULATION_OF_MONOCYTE_CHEMOTAXIS	26	0.665613	2.08507	0.0278884	0.0430986	0.302	1262	tags=54%, list=9%, signal=59%
GOBP_TISSUE_REMODELING	GOBP_TISSUE_REMODELING	171	0.416642	2.08264	0.0570265	0.0435137	0.302	3396	tags=43%, list=24%, signal=56%
GOBP_REACTIVE_NITROGEN_SPECIES_METABOLIC_PROCESS	GOBP_REACTIVE_NITROGEN_SPECIES_METABOLIC_PROCESS	77	0.427212	2.0828	0.0255403	0.043614	0.302	3482	tags=48%, list=25%, signal=64%
GOBP_CARDIAC_CONDUCTION_SYSTEM_DEVELOPMENT	GOBP_CARDIAC_CONDUCTION_SYSTEM_DEVELOPMENT	16	0.604249	2.0819	0	0.0435198	0.304	2401	tags=44%, list=17%, signal=53%
GOBP_POSITIVE_REGULATION_OF_ENDOTHELIAL_CELL_MIGRATION	GOBP_POSITIVE_REGULATION_OF_ENDOTHELIAL_CELL_MIGRATION	105	0.457231	2.08109	0.0330578	0.0436446	0.304	4946	tags=63%, list=36%, signal=97%
GOBP_PHOSPHATIDYLINOSITOL_3_KINASE_SIGNALING	GOBP_PHOSPHATIDYLINOSITOL_3_KINASE_SIGNALING	118	0.417471	2.08069	0.0161616	0.0435979	0.305	2087	tags=32%, list=15%, signal=38%
GOBP_TISSUE_MIGRATION	GOBP_TISSUE_MIGRATION	296	0.430055	2.08014	0.0227743	0.0435703	0.305	3466	tags=45%, list=25%, signal=58%
GOBP_POSITIVE_REGULATION_OF_REGULATED_SECRETORY_PATHWAY	GOBP_POSITIVE_REGULATION_OF_REGULATED_SECRETORY_PATHWAY	43	0.463748	2.07951	0.0377734	0.0436692	0.311	2081	tags=35%, list=15%, signal=41%
GOBP_CELL_JUNCTION_DISASSEMBLY	GOBP_CELL_JUNCTION_DISASSEMBLY	24	0.562334	2.07856	0.0019802	0.0438113	0.319	2414	tags=50%, list=17%, signal=60%
GOBP_TOLL_LIKE_RECEPTOR_3_SIGNALING_PATHWAY	GOBP_TOLL_LIKE_RECEPTOR_3_SIGNALING_PATHWAY	22	0.606477	2.07724	0.0155945	0.0440603	0.319	3086	tags=64%, list=22%, signal=82%
GOBP_POSITIVE_REGULATION_OF_SMOOTH_MUSCLE_CELL_MIGRATION	GOBP_POSITIVE_REGULATION_OF_SMOOTH_MUSCLE_CELL_MIGRATION	61	0.493037	2.07595	0.0316206	0.0442688	0.321	3050	tags=48%, list=22%, signal=61%
GOBP_LYMPH_VESSEL_DEVELOPMENT	GOBP_LYMPH_VESSEL_DEVELOPMENT	31	0.650503	2.07511	0.0146138	0.0443891	0.321	1868	tags=52%, list=13%, signal=59%
GOBP_LEUKOCYTE_ACTIVATION_INVOLVED_IN_INFLAMMATORY_RESPONSE	GOBP_LEUKOCYTE_ACTIVATION_INVOLVED_IN_INFLAMMATORY_RESPONSE	42	0.569306	2.07463	0.0335306	0.0443779	0.321	2684	tags=55%, list=19%, signal=68%
GOBP_REGULATION_OF_EPITHELIAL_CELL_MIGRATION	GOBP_REGULATION_OF_EPITHELIAL_CELL_MIGRATION	223	0.429642	2.07294	0.022449	0.044693	0.327	3229	tags=43%, list=23%, signal=55%
GOBP_NEUTROPHIL_CHEMOTAXIS	GOBP_NEUTROPHIL_CHEMOTAXIS	82	0.650219	2.07137	0.0179283	0.0449939	0.329	1948	tags=56%, list=14%, signal=65%
GOBP_REGULATION_OF_NATURAL_KILLER_CELL_MEDIATED_IMMUNITY	GOBP_REGULATION_OF_NATURAL_KILLER_CELL_MEDIATED_IMMUNITY	35	0.569346	2.07067	0.00806452	0.0451304	0.329	1988	tags=49%, list=14%, signal=57%
GOBP_POSITIVE_REGULATION_OF_B_CELL_MEDIATED_IMMUNITY	GOBP_POSITIVE_REGULATION_OF_B_CELL_MEDIATED_IMMUNITY	37	0.508018	2.07058	0.00813008	0.0450161	0.329	1988	tags=35%, list=14%, signal=41%
GOBP_REGULATION_OF_MEMBRANE_INVAGINATION	GOBP_REGULATION_OF_MEMBRANE_INVAGINATION	19	0.653899	2.06905	0.015873	0.0453545	0.333	961	tags=47%, list=7%, signal=51%
GOBP_MACROPHAGE_CYTOKINE_PRODUCTION	GOBP_MACROPHAGE_CYTOKINE_PRODUCTION	46	0.503756	2.06875	0.030303	0.0453014	0.333	4499	tags=67%, list=32%, signal=99%
GOBP_REGULATION_OF_CALCIUM_MEDIATED_SIGNALING	GOBP_REGULATION_OF_CALCIUM_MEDIATED_SIGNALING	69	0.406546	2.06642	0.0122699	0.0457958	0.336	2675	tags=41%, list=19%, signal=50%
GOBP_LYMPH_VESSEL_MORPHOGENESIS	GOBP_LYMPH_VESSEL_MORPHOGENESIS	23	0.63936	2.06582	0.0144928	0.0458057	0.336	1868	tags=48%, list=13%, signal=55%
GOBP_B_CELL_RECEPTOR_SIGNALING_PATHWAY	GOBP_B_CELL_RECEPTOR_SIGNALING_PATHWAY	45	0.569362	2.06555	0.0257426	0.0457517	0.336	3397	tags=60%, list=24%, signal=79%
GOBP_PROTEIN_KINASE_B_SIGNALING	GOBP_PROTEIN_KINASE_B_SIGNALING	174	0.374062	2.06499	0.0162602	0.0458188	0.336	3153	tags=38%, list=23%, signal=48%
GOBP_NEUTROPHIL_MEDIATED_IMMUNITY	GOBP_NEUTROPHIL_MEDIATED_IMMUNITY	26	0.651433	2.06475	0.01417	0.0457554	0.336	1030	tags=46%, list=7%, signal=50%
GOBP_POSITIVE_REGULATION_OF_CALCIUM_MEDIATED_SIGNALING	GOBP_POSITIVE_REGULATION_OF_CALCIUM_MEDIATED_SIGNALING	35	0.453728	2.06463	0.00814664	0.0457013	0.336	1671	tags=37%, list=12%, signal=42%
GOBP_INTERFERON_BETA_PRODUCTION	GOBP_INTERFERON_BETA_PRODUCTION	65	0.470793	2.06334	0.01875	0.0459415	0.336	2522	tags=40%, list=18%, signal=49%
GOBP_POSITIVE_REGULATION_OF_INTERLEUKIN_10_PRODUCTION	GOBP_POSITIVE_REGULATION_OF_INTERLEUKIN_10_PRODUCTION	32	0.539002	2.06303	0.0180723	0.0458776	0.336	2024	tags=41%, list=15%, signal=47%
GOBP_POSITIVE_REGULATION_OF_PHAGOCYTOSIS_ENGULFMENT	GOBP_POSITIVE_REGULATION_OF_PHAGOCYTOSIS_ENGULFMENT	16	0.627343	2.06128	0.0158103	0.0461867	0.336	961	tags=44%, list=7%, signal=47%
GOBP_REGULATION_OF_ENDOPEPTIDASE_ACTIVITY	GOBP_REGULATION_OF_ENDOPEPTIDASE_ACTIVITY	283	0.374626	2.06076	0.0122699	0.0462154	0.336	4887	tags=53%, list=35%, signal=81%
GOBP_NEGATIVE_REGULATION_OF_TYPE_II_INTERFERON_PRODUCTION	GOBP_NEGATIVE_REGULATION_OF_TYPE_II_INTERFERON_PRODUCTION	29	0.595491	2.06073	0.0148936	0.0460848	0.338	1130	tags=38%, list=8%, signal=41%
GOBP_PHOSPHOLIPASE_C_ACTIVATING_G_PROTEIN_COUPLED_RECEPTOR_SIGNALING_PATHWAY	GOBP_PHOSPHOLIPASE_C_ACTIVATING_G_PROTEIN_COUPLED_RECEPTOR_SIGNALING_PATHWAY	64	0.566492	2.05986	0.027451	0.0461391	0.338	3396	tags=58%, list=24%, signal=76%
GOBP_CIRCULATORY_SYSTEM_PROCESS	GOBP_CIRCULATORY_SYSTEM_PROCESS	437	0.357115	2.05967	0.0362903	0.0460488	0.338	3551	tags=39%, list=25%, signal=51%
GOBP_POSITIVE_REGULATION_OF_MACROPHAGE_MIGRATION	GOBP_POSITIVE_REGULATION_OF_MACROPHAGE_MIGRATION	26	0.671625	2.05862	0.0178218	0.0462187	0.34	2922	tags=73%, list=21%, signal=92%
GOBP_ENDOTHELIUM_DEVELOPMENT	GOBP_ENDOTHELIUM_DEVELOPMENT	125	0.440257	2.05805	0.0389344	0.0462642	0.343	2903	tags=42%, list=21%, signal=53%
GOBP_POSITIVE_REGULATION_OF_MYELOID_LEUKOCYTE_CYTOKINE_PRODUCTION_INVOLVED_IN_IMMUNE_RESPONSE	GOBP_POSITIVE_REGULATION_OF_MYELOID_LEUKOCYTE_CYTOKINE_PRODUCTION_INVOLVED_IN_IMMUNE_RESPONSE	38	0.534275	2.05789	0.022449	0.046181	0.343	3790	tags=63%, list=27%, signal=87%
GOBP_INTERLEUKIN_17_PRODUCTION	GOBP_INTERLEUKIN_17_PRODUCTION	36	0.468834	2.05754	0.0173745	0.046141	0.343	981	tags=31%, list=7%, signal=33%
GOBP_MYOBLAST_FUSION	GOBP_MYOBLAST_FUSION	40	0.544891	2.05649	0.018711	0.0462944	0.346	3203	tags=60%, list=23%, signal=78%
GOBP_ANTIGEN_PROCESSING_AND_PRESENTATION_OF_PEPTIDE_OR_POLYSACCHARIDE_ANTIGEN_VIA_MHC_CLASS_II	GOBP_ANTIGEN_PROCESSING_AND_PRESENTATION_OF_PEPTIDE_OR_POLYSACCHARIDE_ANTIGEN_VIA_MHC_CLASS_II	21	0.705496	2.05547	0	0.0464169	0.346	2379	tags=76%, list=17%, signal=92%
GOBP_CELL_MIGRATION_INVOLVED_IN_HEART_DEVELOPMENT	GOBP_CELL_MIGRATION_INVOLVED_IN_HEART_DEVELOPMENT	18	0.625731	2.05407	0.018711	0.046642	0.347	3396	tags=67%, list=24%, signal=88%
GOBP_RESPIRATORY_BURST	GOBP_RESPIRATORY_BURST	22	0.637197	2.05394	0.0237154	0.0465571	0.347	2675	tags=64%, list=19%, signal=79%
GOBP_SENSORY_PERCEPTION_OF_PAIN	GOBP_SENSORY_PERCEPTION_OF_PAIN	98	0.476805	2.05334	0.0282258	0.0465844	0.347	1998	tags=37%, list=14%, signal=43%
GOBP_MACROPHAGE_DIFFERENTIATION	GOBP_MACROPHAGE_DIFFERENTIATION	52	0.455275	2.0522	0.0302419	0.046765	0.349	1538	tags=33%, list=11%, signal=37%
GOBP_MODULATION_BY_SYMBIONT_OF_ENTRY_INTO_HOST	GOBP_MODULATION_BY_SYMBIONT_OF_ENTRY_INTO_HOST	46	0.452543	2.05071	0.0222672	0.0470266	0.349	2772	tags=41%, list=20%, signal=51%
GOBP_REGULATION_OF_PROTEIN_KINASE_B_SIGNALING	GOBP_REGULATION_OF_PROTEIN_KINASE_B_SIGNALING	146	0.384419	2.05023	0.0165289	0.0469772	0.349	3153	tags=40%, list=23%, signal=51%
GOBP_NEGATIVE_REGULATION_OF_LEUKOCYTE_MIGRATION	GOBP_NEGATIVE_REGULATION_OF_LEUKOCYTE_MIGRATION	42	0.55016	2.0493	0.0198807	0.0470903	0.35	1862	tags=40%, list=13%, signal=47%
GOBP_REGULATION_OF_TUBE_SIZE	GOBP_REGULATION_OF_TUBE_SIZE	141	0.406684	2.04885	0.0478088	0.0470794	0.35	4812	tags=52%, list=35%, signal=78%
GOBP_LYMPHOCYTE_HOMEOSTASIS	GOBP_LYMPHOCYTE_HOMEOSTASIS	75	0.427602	2.04848	0.0289855	0.0470596	0.351	4875	tags=60%, list=35%, signal=92%
GOBP_CELLULAR_RESPONSE_TO_VASCULAR_ENDOTHELIAL_GROWTH_FACTOR_STIMULUS	GOBP_CELLULAR_RESPONSE_TO_VASCULAR_ENDOTHELIAL_GROWTH_FACTOR_STIMULUS	56	0.480158	2.04847	0.0162272	0.0469335	0.351	3412	tags=52%, list=24%, signal=68%
GOBP_TOLL_LIKE_RECEPTOR_SIGNALING_PATHWAY	GOBP_TOLL_LIKE_RECEPTOR_SIGNALING_PATHWAY	60	0.476871	2.04406	0.0418327	0.0480351	0.356	1859	tags=37%, list=13%, signal=42%
GOBP_POSITIVE_REGULATION_OF_CELL_SUBSTRATE_ADHESION	GOBP_POSITIVE_REGULATION_OF_CELL_SUBSTRATE_ADHESION	127	0.403792	2.04311	0.0285132	0.0481686	0.356	3298	tags=43%, list=24%, signal=55%
GOBP_LEUKOCYTE_MIGRATION_INVOLVED_IN_INFLAMMATORY_RESPONSE	GOBP_LEUKOCYTE_MIGRATION_INVOLVED_IN_INFLAMMATORY_RESPONSE	20	0.711334	2.04306	0.00584795	0.0480549	0.356	1236	tags=55%, list=9%, signal=60%
GOBP_COLLAGEN_BIOSYNTHETIC_PROCESS	GOBP_COLLAGEN_BIOSYNTHETIC_PROCESS	53	0.535414	2.04205	0.0104822	0.0482174	0.359	3168	tags=55%, list=23%, signal=71%
GOBP_REGULATION_OF_CD4_POSITIVE_ALPHA_BETA_T_CELL_ACTIVATION	GOBP_REGULATION_OF_CD4_POSITIVE_ALPHA_BETA_T_CELL_ACTIVATION	58	0.461513	2.04044	0.0144033	0.0485108	0.36	3317	tags=45%, list=24%, signal=59%
GOBP_POSITIVE_REGULATION_OF_LEUKOCYTE_DEGRANULATION	GOBP_POSITIVE_REGULATION_OF_LEUKOCYTE_DEGRANULATION	23	0.568801	2.04026	0.0329457	0.0484075	0.36	2081	tags=52%, list=15%, signal=61%
GOBP_NEGATIVE_REGULATION_OF_PROTEOLYSIS	GOBP_NEGATIVE_REGULATION_OF_PROTEOLYSIS	254	0.371648	2.03951	0.00823045	0.0484469	0.362	2437	tags=32%, list=17%, signal=38%
GOBP_REGULATION_OF_BIOLOGICAL_PROCESS_INVOLVED_IN_SYMBIOTIC_INTERACTION	GOBP_REGULATION_OF_BIOLOGICAL_PROCESS_INVOLVED_IN_SYMBIOTIC_INTERACTION	49	0.440079	2.0385	0.0221328	0.0485839	0.362	2772	tags=41%, list=20%, signal=51%
GOBP_VENTRICULAR_CARDIAC_MUSCLE_TISSUE_MORPHOGENESIS	GOBP_VENTRICULAR_CARDIAC_MUSCLE_TISSUE_MORPHOGENESIS	42	0.489416	2.03774	0.0121704	0.0486921	0.363	2795	tags=48%, list=20%, signal=59%
GOBP_REGULATION_OF_GLIAL_CELL_MIGRATION	GOBP_REGULATION_OF_GLIAL_CELL_MIGRATION	24	0.611386	2.03595	0.0275049	0.0491996	0.364	2527	tags=58%, list=18%, signal=71%
GOBP_TISSUE_HOMEOSTASIS	GOBP_TISSUE_HOMEOSTASIS	208	0.355482	2.03558	0.0227273	0.0491532	0.365	2231	tags=28%, list=16%, signal=33%
GOBP_CALCIUM_MEDIATED_SIGNALING_USING_INTRACELLULAR_CALCIUM_SOURCE	GOBP_CALCIUM_MEDIATED_SIGNALING_USING_INTRACELLULAR_CALCIUM_SOURCE	17	0.588643	2.0355	0.0201207	0.0490395	0.365	1279	tags=41%, list=9%, signal=45%
GOBP_REGULATION_OF_HEMOPOIESIS	GOBP_REGULATION_OF_HEMOPOIESIS	370	0.350438	2.03436	0.0517598	0.0490801	0.367	2205	tags=26%, list=16%, signal=30%
GOBP_INTERLEUKIN_2_PRODUCTION	GOBP_INTERLEUKIN_2_PRODUCTION	61	0.427635	2.03541	0.0240481	0.0489236	0.365	1893	tags=31%, list=14%, signal=36%
GOBP_POSITIVE_REGULATION_OF_MACROPHAGE_CHEMOTAXIS	GOBP_POSITIVE_REGULATION_OF_MACROPHAGE_CHEMOTAXIS	20	0.663633	2.03218	0.0235294	0.0495098	0.368	2922	tags=70%, list=21%, signal=88%
GOBP_SYNCYTIUM_FORMATION	GOBP_SYNCYTIUM_FORMATION	55	0.507089	2.03183	0.0289256	0.0494873	0.368	3741	tags=62%, list=27%, signal=84%
GOBP_CELL_MATRIX_ADHESION	GOBP_CELL_MATRIX_ADHESION	207	0.42187	2.03135	0.0331263	0.049436	0.368	3466	tags=45%, list=25%, signal=59%
GOBP_SEQUESTERING_OF_CALCIUM_ION	GOBP_SEQUESTERING_OF_CALCIUM_ION	104	0.442458	2.03072	0.0268041	0.0494646	0.368	4243	tags=55%, list=30%, signal=78%
GOBP_POSITIVE_REGULATION_OF_LEUKOCYTE_ADHESION_TO_VASCULAR_ENDOTHELIAL_CELL	GOBP_POSITIVE_REGULATION_OF_LEUKOCYTE_ADHESION_TO_VASCULAR_ENDOTHELIAL_CELL	21	0.645703	2.03049	0.0335306	0.0494145	0.368	1485	tags=52%, list=11%, signal=59%
GOBP_INTEGRIN_ACTIVATION	GOBP_INTEGRIN_ACTIVATION	24	0.605468	2.0303	0.022	0.0493472	0.368	2488	tags=54%, list=18%, signal=66%
GOBP_REGULATION_OF_I_KAPPAB_KINASE_NF_KAPPAB_SIGNALING	GOBP_REGULATION_OF_I_KAPPAB_KINASE_NF_KAPPAB_SIGNALING	178	0.359995	2.02885	0.024	0.0495534	0.368	2756	tags=33%, list=20%, signal=40%
GOBP_VASCULAR_ENDOTHELIAL_GROWTH_FACTOR_PRODUCTION	GOBP_VASCULAR_ENDOTHELIAL_GROWTH_FACTOR_PRODUCTION	30	0.518658	2.02689	0.0200401	0.0499212	0.368	1481	tags=37%, list=11%, signal=41%
GOBP_VASCULAR_ENDOTHELIAL_GROWTH_FACTOR_SIGNALING_PATHWAY	GOBP_VASCULAR_ENDOTHELIAL_GROWTH_FACTOR_SIGNALING_PATHWAY	38	0.52483	2.02647	0.0247934	0.0499273	0.37	3240	tags=55%, list=23%, signal=72%
GOBP_I_KAPPAB_KINASE_NF_KAPPAB_SIGNALING	GOBP_I_KAPPAB_KINASE_NF_KAPPAB_SIGNALING	217	0.364446	2.02553	0.0283976	0.0500872	0.37	2454	tags=30%, list=18%, signal=36%
GOBP_POSITIVE_REGULATION_OF_CELL_KILLING	GOBP_POSITIVE_REGULATION_OF_CELL_KILLING	61	0.502124	2.02403	0.0215264	0.0504251	0.376	1931	tags=39%, list=14%, signal=45%
GOBP_MATING_BEHAVIOR	GOBP_MATING_BEHAVIOR	33	0.471877	2.02343	0	0.0504558	0.376	2789	tags=36%, list=20%, signal=45%
GOBP_EXOCYTOSIS	GOBP_EXOCYTOSIS	296	0.317511	2.02319	0.0182927	0.0504102	0.376	2081	tags=25%, list=15%, signal=29%
GOBP_GLYCOSPHINGOLIPID_METABOLIC_PROCESS	GOBP_GLYCOSPHINGOLIPID_METABOLIC_PROCESS	46	0.508402	2.02103	0.036	0.0509512	0.378	2992	tags=54%, list=21%, signal=69%
GOBP_RESPONSE_TO_INTERFERON_BETA	GOBP_RESPONSE_TO_INTERFERON_BETA	58	0.631873	2.02006	0.0581395	0.0509481	0.38	2176	tags=60%, list=16%, signal=71%
GOBP_NEGATIVE_REGULATION_OF_ENDOCYTOSIS	GOBP_NEGATIVE_REGULATION_OF_ENDOCYTOSIS	42	0.45197	2.02048	0.0140562	0.0509605	0.38	3595	tags=50%, list=26%, signal=67%
GOBP_RESPONSE_TO_CHEMOKINE	GOBP_RESPONSE_TO_CHEMOKINE	62	0.530375	2.01871	0.0250965	0.0512683	0.38	914	tags=32%, list=7%, signal=34%
GOBP_GAMMA_DELTA_T_CELL_ACTIVATION	GOBP_GAMMA_DELTA_T_CELL_ACTIVATION	18	0.623107	2.01859	0	0.0511611	0.381	1471	tags=39%, list=11%, signal=43%
GOBP_ENDOCARDIAL_CUSHION_FORMATION	GOBP_ENDOCARDIAL_CUSHION_FORMATION	29	0.541711	2.0185	0.00404858	0.0510599	0.381	2795	tags=45%, list=20%, signal=56%
GOBP_NEURON_PROJECTION_REGENERATION	GOBP_NEURON_PROJECTION_REGENERATION	57	0.438442	2.01755	0.0101833	0.0511846	0.383	2096	tags=35%, list=15%, signal=41%
GOBP_BLOOD_VESSEL_ENDOTHELIAL_CELL_PROLIFERATION_INVOLVED_IN_SPROUTING_ANGIOGENESIS	GOBP_BLOOD_VESSEL_ENDOTHELIAL_CELL_PROLIFERATION_INVOLVED_IN_SPROUTING_ANGIOGENESIS	20	0.64217	2.01601	0.0292276	0.0513957	0.386	2441	tags=60%, list=18%, signal=73%
GOBP_REGULATION_OF_T_CELL_RECEPTOR_SIGNALING_PATHWAY	GOBP_REGULATION_OF_T_CELL_RECEPTOR_SIGNALING_PATHWAY	40	0.450859	2.01542	0.0120968	0.0515039	0.386	2545	tags=43%, list=18%, signal=52%
GOBP_ACUTE_INFLAMMATORY_RESPONSE	GOBP_ACUTE_INFLAMMATORY_RESPONSE	69	0.525671	2.01494	0.0333988	0.0514903	0.388	1948	tags=42%, list=14%, signal=49%
GOBP_REGULATION_OF_RELEASE_OF_SEQUESTERED_CALCIUM_ION_INTO_CYTOSOL	GOBP_REGULATION_OF_RELEASE_OF_SEQUESTERED_CALCIUM_ION_INTO_CYTOSOL	68	0.486517	2.01386	0.0241449	0.0516975	0.388	3527	tags=56%, list=25%, signal=74%
GOBP_ASTROCYTE_ACTIVATION	GOBP_ASTROCYTE_ACTIVATION	18	0.606149	2.01377	0.0177866	0.0516122	0.389	2002	tags=56%, list=14%, signal=65%
GOBP_REGULATION_OF_IMMUNOGLOBULIN_PRODUCTION	GOBP_REGULATION_OF_IMMUNOGLOBULIN_PRODUCTION	64	0.408393	2.01312	0.0203252	0.051702	0.389	1988	tags=30%, list=14%, signal=34%
GOBP_ANTIMICROBIAL_HUMORAL_IMMUNE_RESPONSE_MEDIATED_BY_ANTIMICROBIAL_PEPTIDE	GOBP_ANTIMICROBIAL_HUMORAL_IMMUNE_RESPONSE_MEDIATED_BY_ANTIMICROBIAL_PEPTIDE	47	0.542156	2.01182	0.00566038	0.0518729	0.391	3795	tags=60%, list=27%, signal=82%
GOBP_NEGATIVE_REGULATION_OF_RESPONSE_TO_WOUNDING	GOBP_NEGATIVE_REGULATION_OF_RESPONSE_TO_WOUNDING	70	0.430361	2.01165	0.0251572	0.0517844	0.391	1905	tags=34%, list=14%, signal=40%
GOBP_POSITIVE_REGULATION_OF_EPITHELIAL_CELL_MIGRATION	GOBP_POSITIVE_REGULATION_OF_EPITHELIAL_CELL_MIGRATION	151	0.430892	2.01138	0.0286885	0.0517412	0.391	3429	tags=45%, list=25%, signal=59%
GOBP_POSITIVE_REGULATION_OF_MACROPHAGE_CYTOKINE_PRODUCTION	GOBP_POSITIVE_REGULATION_OF_MACROPHAGE_CYTOKINE_PRODUCTION	27	0.55901	2.01102	0.0323232	0.0517087	0.391	3790	tags=67%, list=27%, signal=91%
GOBP_REGULATION_OF_CALCIUM_ION_TRANSMEMBRANE_TRANSPORT	GOBP_REGULATION_OF_CALCIUM_ION_TRANSMEMBRANE_TRANSPORT	156	0.399239	2.01092	0.0336634	0.0516251	0.395	3412	tags=47%, list=24%, signal=62%
GOBP_RENAL_SYSTEM_VASCULATURE_DEVELOPMENT	GOBP_RENAL_SYSTEM_VASCULATURE_DEVELOPMENT	25	0.684547	2.00939	0.0327869	0.0518585	0.396	1160	tags=44%, list=8%, signal=48%
GOBP_CELL_SUBSTRATE_ADHESION	GOBP_CELL_SUBSTRATE_ADHESION	325	0.400296	2.00836	0.0439331	0.0520668	0.396	3466	tags=42%, list=25%, signal=55%
GOBP_POSITIVE_REGULATION_OF_COAGULATION	GOBP_POSITIVE_REGULATION_OF_COAGULATION	22	0.597763	2.00795	0.0175781	0.052023	0.396	3130	tags=68%, list=22%, signal=88%
GOBP_VENTRICULAR_CARDIAC_MUSCLE_TISSUE_DEVELOPMENT	GOBP_VENTRICULAR_CARDIAC_MUSCLE_TISSUE_DEVELOPMENT	50	0.451418	2.00691	0.0120968	0.0521818	0.396	2795	tags=42%, list=20%, signal=52%
GOBP_REGULATION_OF_LIPOPOLYSACCHARIDE_MEDIATED_SIGNALING_PATHWAY	GOBP_REGULATION_OF_LIPOPOLYSACCHARIDE_MEDIATED_SIGNALING_PATHWAY	25	0.574146	2.00462	0.029703	0.0527823	0.398	4505	tags=76%, list=32%, signal=112%
GOBP_NEGATIVE_REGULATION_OF_OSTEOCLAST_DIFFERENTIATION	GOBP_NEGATIVE_REGULATION_OF_OSTEOCLAST_DIFFERENTIATION	30	0.630214	2.00334	0.014	0.0530422	0.398	2391	tags=57%, list=17%, signal=68%
GOBP_NEGATIVE_REGULATION_OF_G_PROTEIN_COUPLED_RECEPTOR_SIGNALING_PATHWAY	GOBP_NEGATIVE_REGULATION_OF_G_PROTEIN_COUPLED_RECEPTOR_SIGNALING_PATHWAY	44	0.493745	2.00308	0.0162602	0.0530127	0.399	2498	tags=41%, list=18%, signal=50%
GOBP_VASCULAR_ASSOCIATED_SMOOTH_MUSCLE_CONTRACTION	GOBP_VASCULAR_ASSOCIATED_SMOOTH_MUSCLE_CONTRACTION	25	0.530236	2.00206	0.021611	0.0531379	0.399	4092	tags=56%, list=29%, signal=79%
GOBP_ACTIVATION_OF_CYSTEINE_TYPE_ENDOPEPTIDASE_ACTIVITY	GOBP_ACTIVATION_OF_CYSTEINE_TYPE_ENDOPEPTIDASE_ACTIVITY	26	0.580891	2.00205	0.0281125	0.0530186	0.399	2658	tags=58%, list=19%, signal=71%
GOBP_NEGATIVE_REGULATION_OF_VASCULATURE_DEVELOPMENT	GOBP_NEGATIVE_REGULATION_OF_VASCULATURE_DEVELOPMENT	95	0.424816	2.00134	0.0456432	0.053117	0.399	1942	tags=31%, list=14%, signal=35%
GOBP_REGULATION_OF_HUMORAL_IMMUNE_RESPONSE	GOBP_REGULATION_OF_HUMORAL_IMMUNE_RESPONSE	34	0.536184	2.00055	0.0321932	0.0532356	0.401	1971	tags=47%, list=14%, signal=55%
GOBP_POSITIVE_REGULATION_OF_MONOCYTE_CHEMOTACTIC_PROTEIN_1_PRODUCTION	GOBP_POSITIVE_REGULATION_OF_MONOCYTE_CHEMOTACTIC_PROTEIN_1_PRODUCTION	16	0.695376	2.00052	0.015748	0.0531173	0.401	2675	tags=69%, list=19%, signal=85%
GOBP_INTERLEUKIN_8_PRODUCTION	GOBP_INTERLEUKIN_8_PRODUCTION	66	0.441676	1.99977	0.0424242	0.0532199	0.401	2522	tags=38%, list=18%, signal=46%
GOBP_REGULATION_OF_SUBSTRATE_ADHESION_DEPENDENT_CELL_SPREADING	GOBP_REGULATION_OF_SUBSTRATE_ADHESION_DEPENDENT_CELL_SPREADING	57	0.46367	1.99936	0	0.0532414	0.403	3466	tags=51%, list=25%, signal=67%
GOBP_REGULATION_OF_INTEGRIN_MEDIATED_SIGNALING_PATHWAY	GOBP_REGULATION_OF_INTEGRIN_MEDIATED_SIGNALING_PATHWAY	19	0.67624	1.99879	0.028169	0.0533658	0.403	2833	tags=74%, list=20%, signal=92%
GOBP_BONE_RESORPTION	GOBP_BONE_RESORPTION	61	0.471656	1.99837	0.0427699	0.0533589	0.403	1818	tags=36%, list=13%, signal=41%
GOBP_REGULATION_OF_VASCULOGENESIS	GOBP_REGULATION_OF_VASCULOGENESIS	16	0.650488	1.99793	0.0117417	0.0533494	0.403	2713	tags=69%, list=19%, signal=85%
GOBP_T_CELL_RECEPTOR_SIGNALING_PATHWAY	GOBP_T_CELL_RECEPTOR_SIGNALING_PATHWAY	104	0.312399	1.99749	0.0121457	0.05335	0.404	1971	tags=23%, list=14%, signal=27%
GOBP_POSITIVE_REGULATION_OF_MAST_CELL_ACTIVATION	GOBP_POSITIVE_REGULATION_OF_MAST_CELL_ACTIVATION	21	0.631591	1.99673	0.011583	0.0535332	0.404	2081	tags=62%, list=15%, signal=73%
GOBP_HETEROPHILIC_CELL_CELL_ADHESION_VIA_PLASMA_MEMBRANE_CELL_ADHESION_MOLECULES	GOBP_HETEROPHILIC_CELL_CELL_ADHESION_VIA_PLASMA_MEMBRANE_CELL_ADHESION_MOLECULES	38	0.565584	1.99648	0.0244399	0.053458	0.407	1906	tags=45%, list=14%, signal=52%
GOBP_VIRAL_GENOME_REPLICATION	GOBP_VIRAL_GENOME_REPLICATION	109	0.405942	1.99547	0.028169	0.0536811	0.407	1785	tags=28%, list=13%, signal=32%
GOBP_INTRACELLULAR_MONOATOMIC_ION_HOMEOSTASIS	GOBP_INTRACELLULAR_MONOATOMIC_ION_HOMEOSTASIS	426	0.320268	1.99399	0.0240481	0.0539945	0.407	6802	tags=64%, list=49%, signal=122%
GOBP_CD4_POSITIVE_ALPHA_BETA_T_CELL_PROLIFERATION	GOBP_CD4_POSITIVE_ALPHA_BETA_T_CELL_PROLIFERATION	22	0.470341	1.99287	0.00394477	0.0542206	0.407	3317	tags=55%, list=24%, signal=71%
GOBP_NEGATIVE_REGULATION_OF_ANTIGEN_RECEPTOR_MEDIATED_SIGNALING_PATHWAY	GOBP_NEGATIVE_REGULATION_OF_ANTIGEN_RECEPTOR_MEDIATED_SIGNALING_PATHWAY	24	0.550176	1.99216	0.0297619	0.0542626	0.407	2376	tags=50%, list=17%, signal=60%
GOBP_B_CELL_DIFFERENTIATION	GOBP_B_CELL_DIFFERENTIATION	119	0.408304	1.99092	0.0545455	0.0543628	0.408	2511	tags=34%, list=18%, signal=42%
GOBP_GLYCOPROTEIN_METABOLIC_PROCESS	GOBP_GLYCOPROTEIN_METABOLIC_PROCESS	306	0.346484	1.99124	0.0186722	0.0544189	0.408	5403	tags=58%, list=39%, signal=92%
GOBP_REGULATION_OF_NEUROINFLAMMATORY_RESPONSE	GOBP_REGULATION_OF_NEUROINFLAMMATORY_RESPONSE	23	0.569428	1.99084	0.024	0.0542548	0.408	1742	tags=43%, list=13%, signal=50%
GOBP_NEGATIVE_REGULATION_OF_RESPONSE_TO_BIOTIC_STIMULUS	GOBP_NEGATIVE_REGULATION_OF_RESPONSE_TO_BIOTIC_STIMULUS	109	0.387229	1.99069	0.0176471	0.0541522	0.408	2176	tags=32%, list=16%, signal=38%
GOBP_CELL_COMMUNICATION_BY_ELECTRICAL_COUPLING	GOBP_CELL_COMMUNICATION_BY_ELECTRICAL_COUPLING	16	0.570507	1.99026	0.0273973	0.0541533	0.408	3086	tags=63%, list=22%, signal=80%
GOBP_EXTRACELLULAR_MATRIX_DISASSEMBLY	GOBP_EXTRACELLULAR_MATRIX_DISASSEMBLY	29	0.569664	1.99008	0.044898	0.0540658	0.409	3751	tags=66%, list=27%, signal=89%
GOBP_REGULATION_OF_MYELOID_CELL_APOPTOTIC_PROCESS	GOBP_REGULATION_OF_MYELOID_CELL_APOPTOTIC_PROCESS	33	0.468936	1.98722	0.00813008	0.0546667	0.409	4578	tags=61%, list=33%, signal=90%
GOBP_POSITIVE_REGULATION_OF_EPITHELIAL_TO_MESENCHYMAL_TRANSITION	GOBP_POSITIVE_REGULATION_OF_EPITHELIAL_TO_MESENCHYMAL_TRANSITION	47	0.468016	1.98657	0.00425532	0.0547216	0.409	3408	tags=49%, list=24%, signal=65%
GOBP_SURFACTANT_HOMEOSTASIS	GOBP_SURFACTANT_HOMEOSTASIS	22	0.605319	1.98471	0.0342052	0.0552224	0.409	2176	tags=50%, list=16%, signal=59%
GOBP_NEGATIVE_REGULATION_OF_NOTCH_SIGNALING_PATHWAY	GOBP_NEGATIVE_REGULATION_OF_NOTCH_SIGNALING_PATHWAY	33	0.490425	1.98418	0.0218254	0.0552518	0.409	2860	tags=45%, list=21%, signal=57%
GOBP_NEGATIVE_REGULATION_OF_CYSTEINE_TYPE_ENDOPEPTIDASE_ACTIVITY	GOBP_NEGATIVE_REGULATION_OF_CYSTEINE_TYPE_ENDOPEPTIDASE_ACTIVITY	79	0.395398	1.9833	0.0414201	0.0553958	0.409	6362	tags=72%, list=46%, signal=132%
GOBP_ENDOCARDIAL_CUSHION_DEVELOPMENT	GOBP_ENDOCARDIAL_CUSHION_DEVELOPMENT	47	0.48061	1.98293	0.0167015	0.0554019	0.413	2795	tags=43%, list=20%, signal=53%
GOBP_DETECTION_OF_EXTERNAL_BIOTIC_STIMULUS	GOBP_DETECTION_OF_EXTERNAL_BIOTIC_STIMULUS	22	0.810655	1.98218	0.00392157	0.0555406	0.413	1845	tags=77%, list=13%, signal=89%
GOBP_ANTIMICROBIAL_HUMORAL_RESPONSE	GOBP_ANTIMICROBIAL_HUMORAL_RESPONSE	64	0.546652	1.98217	0.00579151	0.0554167	0.413	2941	tags=52%, list=21%, signal=65%
GOBP_ASTROCYTE_DIFFERENTIATION	GOBP_ASTROCYTE_DIFFERENTIATION	75	0.390403	1.98196	0.0142566	0.0553375	0.413	2484	tags=33%, list=18%, signal=40%
GOBP_PERICARDIUM_DEVELOPMENT	GOBP_PERICARDIUM_DEVELOPMENT	22	0.610905	1.97978	0.00617284	0.0559757	0.417	1152	tags=36%, list=8%, signal=40%
GOBP_CARDIAC_EPITHELIAL_TO_MESENCHYMAL_TRANSITION	GOBP_CARDIAC_EPITHELIAL_TO_MESENCHYMAL_TRANSITION	35	0.471806	1.97863	0.0263158	0.0561993	0.417	2795	tags=43%, list=20%, signal=53%
GOBP_ENDOCRINE_PROCESS	GOBP_ENDOCRINE_PROCESS	80	0.450231	1.97568	0.0137255	0.0569211	0.419	1934	tags=34%, list=14%, signal=39%
GOBP_NEUTROPHIL_ACTIVATION_INVOLVED_IN_IMMUNE_RESPONSE	GOBP_NEUTROPHIL_ACTIVATION_INVOLVED_IN_IMMUNE_RESPONSE	16	0.817172	1.97555	0	0.0568571	0.419	687	tags=63%, list=5%, signal=66%
GOBP_CD8_POSITIVE_ALPHA_BETA_T_CELL_ACTIVATION	GOBP_CD8_POSITIVE_ALPHA_BETA_T_CELL_ACTIVATION	23	0.607953	1.97548	0.0180723	0.0567483	0.419	1801	tags=39%, list=13%, signal=45%
GOBP_POSITIVE_REGULATION_OF_CYTOSOLIC_CALCIUM_ION_CONCENTRATION	GOBP_POSITIVE_REGULATION_OF_CYTOSOLIC_CALCIUM_ION_CONCENTRATION	140	0.482115	1.97446	0.0427184	0.0569663	0.419	2511	tags=42%, list=18%, signal=51%
GOBP_REGULATION_OF_ALPHA_BETA_T_CELL_ACTIVATION	GOBP_REGULATION_OF_ALPHA_BETA_T_CELL_ACTIVATION	92	0.423807	1.97373	0.0256917	0.0570955	0.419	3132	tags=40%, list=22%, signal=52%
GOBP_REGULATION_OF_SYNCYTIUM_FORMATION_BY_PLASMA_MEMBRANE_FUSION	GOBP_REGULATION_OF_SYNCYTIUM_FORMATION_BY_PLASMA_MEMBRANE_FUSION	27	0.678697	1.97359	0.0100806	0.0570089	0.419	3499	tags=85%, list=25%, signal=114%
GOBP_NEGATIVE_REGULATION_OF_T_CELL_PROLIFERATION	GOBP_NEGATIVE_REGULATION_OF_T_CELL_PROLIFERATION	60	0.422192	1.97344	0.0440882	0.0569441	0.419	3488	tags=43%, list=25%, signal=58%
GOBP_MATURE_B_CELL_DIFFERENTIATION	GOBP_MATURE_B_CELL_DIFFERENTIATION	33	0.528802	1.97221	0.0507099	0.057098	0.422	1848	tags=42%, list=13%, signal=49%
GOBP_REGULATION_OF_POSITIVE_CHEMOTAXIS	GOBP_REGULATION_OF_POSITIVE_CHEMOTAXIS	24	0.549859	1.97329	0.0118343	0.056863	0.419	1262	tags=38%, list=9%, signal=41%
GOBP_POSITIVE_REGULATION_OF_REACTIVE_OXYGEN_SPECIES_BIOSYNTHETIC_PROCESS	GOBP_POSITIVE_REGULATION_OF_REACTIVE_OXYGEN_SPECIES_BIOSYNTHETIC_PROCESS	18	0.563925	1.97174	0.00399202	0.0571224	0.422	1672	tags=39%, list=12%, signal=44%
GOBP_POSITIVE_REGULATION_OF_SUBSTRATE_ADHESION_DEPENDENT_CELL_SPREADING	GOBP_POSITIVE_REGULATION_OF_SUBSTRATE_ADHESION_DEPENDENT_CELL_SPREADING	41	0.487335	1.97125	0.00816326	0.0571434	0.422	3298	tags=51%, list=24%, signal=67%
GOBP_REGULATION_OF_INTEGRIN_ACTIVATION	GOBP_REGULATION_OF_INTEGRIN_ACTIVATION	16	0.679781	1.97119	0.0204499	0.0570356	0.422	1279	tags=50%, list=9%, signal=55%
GOBP_RESPONSE_TO_INTERFERON_ALPHA	GOBP_RESPONSE_TO_INTERFERON_ALPHA	26	0.617006	1.97081	0.0415842	0.0570172	0.422	2189	tags=54%, list=16%, signal=64%
GOBP_CALCIUM_ION_TRANSPORT	GOBP_CALCIUM_ION_TRANSPORT	334	0.351056	1.96961	0.0466531	0.057293	0.424	4058	tags=45%, list=29%, signal=62%
GOBP_SECOND_MESSENGER_MEDIATED_SIGNALING	GOBP_SECOND_MESSENGER_MEDIATED_SIGNALING	210	0.382203	1.9682	0.0542169	0.0574481	0.428	2880	tags=37%, list=21%, signal=46%
GOBP_REGULATION_OF_NEUTROPHIL_CHEMOTAXIS	GOBP_REGULATION_OF_NEUTROPHIL_CHEMOTAXIS	35	0.651994	1.96824	0.019305	0.0575687	0.428	2379	tags=63%, list=17%, signal=76%
GOBP_NEGATIVE_REGULATION_OF_CELL_DEVELOPMENT	GOBP_NEGATIVE_REGULATION_OF_CELL_DEVELOPMENT	260	0.346497	1.96818	0.0410678	0.0573335	0.428	2593	tags=29%, list=19%, signal=35%
GOBP_EATING_BEHAVIOR	GOBP_EATING_BEHAVIOR	25	0.585898	1.96652	0	0.0576941	0.429	1864	tags=44%, list=13%, signal=51%
GOBP_LEUKOCYTE_TETHERING_OR_ROLLING	GOBP_LEUKOCYTE_TETHERING_OR_ROLLING	29	0.671955	1.96644	0.0360721	0.0575868	0.429	2414	tags=62%, list=17%, signal=75%
GOBP_INTERLEUKIN_12_PRODUCTION	GOBP_INTERLEUKIN_12_PRODUCTION	49	0.538528	1.96625	0.029703	0.0575297	0.429	3013	tags=53%, list=22%, signal=67%
GOBP_NEGATIVE_REGULATION_OF_INFLAMMATORY_RESPONSE	GOBP_NEGATIVE_REGULATION_OF_INFLAMMATORY_RESPONSE	113	0.393373	1.96615	0.0364372	0.0574455	0.429	1848	tags=30%, list=13%, signal=34%
GOBP_T_CELL_SELECTION	GOBP_T_CELL_SELECTION	44	0.443806	1.96532	0.0203252	0.0575915	0.429	1988	tags=32%, list=14%, signal=37%
GOBP_POSITIVE_REGULATION_OF_B_CELL_PROLIFERATION	GOBP_POSITIVE_REGULATION_OF_B_CELL_PROLIFERATION	38	0.519102	1.96508	0.0322581	0.0575432	0.431	597	tags=29%, list=4%, signal=30%
GOBP_REGULATION_OF_SYSTEMIC_ARTERIAL_BLOOD_PRESSURE_BY_RENIN_ANGIOTENSIN	GOBP_REGULATION_OF_SYSTEMIC_ARTERIAL_BLOOD_PRESSURE_BY_RENIN_ANGIOTENSIN	22	0.601643	1.96304	0.0172414	0.0581356	0.434	1453	tags=45%, list=10%, signal=51%
GOBP_INORGANIC_ION_HOMEOSTASIS	GOBP_INORGANIC_ION_HOMEOSTASIS	439	0.309327	1.96276	0.0298805	0.0580847	0.434	4976	tags=48%, list=36%, signal=72%
GOBP_LEUKOCYTE_APOPTOTIC_PROCESS	GOBP_LEUKOCYTE_APOPTOTIC_PROCESS	114	0.398371	1.96126	0.01875	0.0583944	0.434	4816	tags=53%, list=35%, signal=80%
GOBP_POSITIVE_REGULATION_OF_CD4_POSITIVE_ALPHA_BETA_T_CELL_ACTIVATION	GOBP_POSITIVE_REGULATION_OF_CD4_POSITIVE_ALPHA_BETA_T_CELL_ACTIVATION	32	0.5382	1.96095	0.0060241	0.0584256	0.434	3317	tags=56%, list=24%, signal=74%
GOBP_ENSHEATHMENT_OF_NEURONS	GOBP_ENSHEATHMENT_OF_NEURONS	148	0.359326	1.95919	0	0.0587584	0.439	1997	tags=29%, list=14%, signal=34%
GOBP_NEGATIVE_REGULATION_OF_VASCULAR_PERMEABILITY	GOBP_NEGATIVE_REGULATION_OF_VASCULAR_PERMEABILITY	20	0.651267	1.95841	0.0362173	0.0588745	0.439	2488	tags=60%, list=18%, signal=73%
GOBP_POSITIVE_REGULATION_OF_EPITHELIAL_CELL_PROLIFERATION	GOBP_POSITIVE_REGULATION_OF_EPITHELIAL_CELL_PROLIFERATION	192	0.373059	1.95708	0.0447154	0.059174	0.44	3862	tags=40%, list=28%, signal=55%
GOBP_NEGATIVE_REGULATION_OF_MYELOID_CELL_DIFFERENTIATION	GOBP_NEGATIVE_REGULATION_OF_MYELOID_CELL_DIFFERENTIATION	84	0.407639	1.95545	0.039666	0.0594897	0.44	1791	tags=27%, list=13%, signal=31%
GOBP_LYMPH_NODE_DEVELOPMENT	GOBP_LYMPH_NODE_DEVELOPMENT	25	0.541426	1.95454	0.0273973	0.0596672	0.44	2341	tags=48%, list=17%, signal=58%
GOBP_INFLAMMATORY_CELL_APOPTOTIC_PROCESS	GOBP_INFLAMMATORY_CELL_APOPTOTIC_PROCESS	22	0.557587	1.95448	0.0181087	0.0595506	0.44	4754	tags=77%, list=34%, signal=117%
GOBP_VASODILATION	GOBP_VASODILATION	51	0.455286	1.95313	0.0200803	0.0598855	0.442	2214	tags=37%, list=16%, signal=44%
GOBP_T_CELL_CHEMOTAXIS	GOBP_T_CELL_CHEMOTAXIS	21	0.543581	1.95278	0.0217822	0.0598866	0.442	3244	tags=52%, list=23%, signal=68%
GOBP_B_CELL_PROLIFERATION	GOBP_B_CELL_PROLIFERATION	69	0.470944	1.9522	0.0479167	0.0599377	0.444	3282	tags=46%, list=24%, signal=60%
GOBP_POSITIVE_REGULATION_OF_REACTIVE_OXYGEN_SPECIES_METABOLIC_PROCESS	GOBP_POSITIVE_REGULATION_OF_REACTIVE_OXYGEN_SPECIES_METABOLIC_PROCESS	64	0.462033	1.95218	0.0247423	0.059817	0.444	2205	tags=39%, list=16%, signal=46%
GOBP_ALPHA_BETA_T_CELL_ACTIVATION	GOBP_ALPHA_BETA_T_CELL_ACTIVATION	146	0.394918	1.95198	0.0476191	0.0597545	0.444	3132	tags=36%, list=22%, signal=46%
GOBP_CALCIUM_ION_HOMEOSTASIS	GOBP_CALCIUM_ION_HOMEOSTASIS	264	0.328709	1.95189	0.0456349	0.0596673	0.445	4147	tags=43%, list=30%, signal=60%
GOBP_REGULATION_OF_METAL_ION_TRANSPORT	GOBP_REGULATION_OF_METAL_ION_TRANSPORT	353	0.333659	1.95172	0.0425101	0.0595981	0.445	3421	tags=40%, list=25%, signal=51%
GOBP_NEGATIVE_REGULATION_OF_REGULATED_SECRETORY_PATHWAY	GOBP_NEGATIVE_REGULATION_OF_REGULATED_SECRETORY_PATHWAY	22	0.583705	1.9517	0.0162602	0.0594811	0.445	2639	tags=50%, list=19%, signal=62%
GOBP_FC_RECEPTOR_MEDIATED_STIMULATORY_SIGNALING_PATHWAY	GOBP_FC_RECEPTOR_MEDIATED_STIMULATORY_SIGNALING_PATHWAY	17	0.675018	1.95129	0.00389105	0.0594739	0.445	1979	tags=65%, list=14%, signal=75%
GOBP_CELLULAR_RESPONSE_TO_INTERFERON_BETA	GOBP_CELLULAR_RESPONSE_TO_INTERFERON_BETA	48	0.607044	1.95045	0.061657	0.0594927	0.445	2765	tags=63%, list=20%, signal=78%
GOBP_NEGATIVE_REGULATION_OF_TRANSPORT	GOBP_NEGATIVE_REGULATION_OF_TRANSPORT	412	0.31231	1.95092	0.0219561	0.0594836	0.445	6122	tags=57%, list=44%, signal=98%
GOBP_CELLULAR_RESPONSE_TO_INTERFERON_ALPHA	GOBP_CELLULAR_RESPONSE_TO_INTERFERON_ALPHA	17	0.593962	1.94956	0.0337302	0.0596433	0.445	2189	tags=47%, list=16%, signal=56%
GOBP_POSITIVE_REGULATION_OF_INTERFERON_ALPHA_PRODUCTION	GOBP_POSITIVE_REGULATION_OF_INTERFERON_ALPHA_PRODUCTION	25	0.53383	1.94871	0.011811	0.059776	0.446	2522	tags=48%, list=18%, signal=59%
GOBP_NEGATIVE_REGULATION_OF_VIRAL_LIFE_CYCLE	GOBP_NEGATIVE_REGULATION_OF_VIRAL_LIFE_CYCLE	28	0.554929	1.94865	0.0335968	0.0596665	0.446	2772	tags=54%, list=20%, signal=67%
GOBP_PROTEIN_KINASE_C_SIGNALING	GOBP_PROTEIN_KINASE_C_SIGNALING	32	0.458359	1.94768	0.0223577	0.0598841	0.446	3025	tags=44%, list=22%, signal=56%
GOBP_POSITIVE_REGULATION_OF_T_CELL_PROLIFERATION	GOBP_POSITIVE_REGULATION_OF_T_CELL_PROLIFERATION	87	0.454057	1.94689	0.0290135	0.059927	0.446	3010	tags=46%, list=22%, signal=58%
GOBP_REGULATION_OF_PHOSPHOLIPASE_ACTIVITY	GOBP_REGULATION_OF_PHOSPHOLIPASE_ACTIVITY	45	0.4589	1.94685	0.0264228	0.0598225	0.446	4741	tags=60%, list=34%, signal=91%
GOBP_ANTIGEN_PROCESSING_AND_PRESENTATION_OF_EXOGENOUS_PEPTIDE_ANTIGEN	GOBP_ANTIGEN_PROCESSING_AND_PRESENTATION_OF_EXOGENOUS_PEPTIDE_ANTIGEN	23	0.648449	1.94577	0.0174419	0.0600028	0.447	2379	tags=65%, list=17%, signal=79%
GOBP_POSITIVE_REGULATION_OF_INTERLEUKIN_8_PRODUCTION	GOBP_POSITIVE_REGULATION_OF_INTERLEUKIN_8_PRODUCTION	52	0.425865	1.9452	0.0507099	0.0599988	0.447	2522	tags=37%, list=18%, signal=44%
GOBP_REGULATION_OF_SYSTEMIC_ARTERIAL_BLOOD_PRESSURE_MEDIATED_BY_A_CHEMICAL_SIGNAL	GOBP_REGULATION_OF_SYSTEMIC_ARTERIAL_BLOOD_PRESSURE_MEDIATED_BY_A_CHEMICAL_SIGNAL	40	0.525168	1.94538	0.0157171	0.060071	0.447	1828	tags=38%, list=13%, signal=43%
GOBP_POSITIVE_REGULATION_OF_SMALL_GTPASE_MEDIATED_SIGNAL_TRANSDUCTION	GOBP_POSITIVE_REGULATION_OF_SMALL_GTPASE_MEDIATED_SIGNAL_TRANSDUCTION	67	0.421719	1.94514	0.045082	0.0599032	0.447	3233	tags=43%, list=23%, signal=56%
GOBP_NEGATIVE_REGULATION_OF_T_CELL_MEDIATED_IMMUNITY	GOBP_NEGATIVE_REGULATION_OF_T_CELL_MEDIATED_IMMUNITY	16	0.647988	1.9443	0.0342742	0.060092	0.447	1883	tags=50%, list=14%, signal=58%
GOBP_NEGATIVE_REGULATION_OF_CYTOKINE_PRODUCTION_INVOLVED_IN_IMMUNE_RESPONSE	GOBP_NEGATIVE_REGULATION_OF_CYTOKINE_PRODUCTION_INVOLVED_IN_IMMUNE_RESPONSE	25	0.529884	1.94407	0.0270833	0.0600241	0.447	2781	tags=52%, list=20%, signal=65%
GOBP_POSITIVE_REGULATION_OF_SYNCYTIUM_FORMATION_BY_PLASMA_MEMBRANE_FUSION	GOBP_POSITIVE_REGULATION_OF_SYNCYTIUM_FORMATION_BY_PLASMA_MEMBRANE_FUSION	20	0.741566	1.94257	0.00795229	0.0603325	0.447	3203	tags=90%, list=23%, signal=117%
GOBP_REGULATION_OF_RECEPTOR_BINDING	GOBP_REGULATION_OF_RECEPTOR_BINDING	20	0.528937	1.94251	0	0.0602202	0.447	1493	tags=40%, list=11%, signal=45%
GOBP_POSITIVE_REGULATION_OF_COLLAGEN_METABOLIC_PROCESS	GOBP_POSITIVE_REGULATION_OF_COLLAGEN_METABOLIC_PROCESS	34	0.533848	1.94087	0.00645161	0.0606788	0.447	3278	tags=53%, list=24%, signal=69%
GOBP_REGULATION_OF_RENAL_SYSTEM_PROCESS	GOBP_REGULATION_OF_RENAL_SYSTEM_PROCESS	34	0.486641	1.94033	0.0311891	0.0607478	0.447	1665	tags=35%, list=12%, signal=40%
GOBP_INOSITOL_LIPID_MEDIATED_SIGNALING	GOBP_INOSITOL_LIPID_MEDIATED_SIGNALING	148	0.396087	1.94012	0.0572597	0.0605916	0.447	2469	tags=32%, list=18%, signal=39%
GOBP_PROTEIN_MATURATION	GOBP_PROTEIN_MATURATION	281	0.3596	1.94032	0.004158	0.0606337	0.447	5180	tags=55%, list=37%, signal=85%
GOBP_POSITIVE_REGULATION_OF_PHOSPHOLIPASE_ACTIVITY	GOBP_POSITIVE_REGULATION_OF_PHOSPHOLIPASE_ACTIVITY	35	0.470217	1.93948	0.0362173	0.0606814	0.447	4741	tags=63%, list=34%, signal=95%
GOBP_MYELOID_CELL_APOPTOTIC_PROCESS	GOBP_MYELOID_CELL_APOPTOTIC_PROCESS	37	0.45969	1.93925	0.0122449	0.0606676	0.447	4578	tags=59%, list=33%, signal=88%
GOBP_POSITIVE_REGULATION_OF_OXIDATIVE_STRESS_INDUCED_CELL_DEATH	GOBP_POSITIVE_REGULATION_OF_OXIDATIVE_STRESS_INDUCED_CELL_DEATH	20	0.505675	1.93879	0.00824742	0.0606692	0.447	482	tags=25%, list=3%, signal=26%
GOBP_MONOATOMIC_ION_HOMEOSTASIS	GOBP_MONOATOMIC_ION_HOMEOSTASIS	499	0.309509	1.93868	0.0320641	0.0605782	0.447	6339	tags=59%, list=45%, signal=105%
GOBP_POSITIVE_REGULATION_OF_B_CELL_ACTIVATION	GOBP_POSITIVE_REGULATION_OF_B_CELL_ACTIVATION	75	0.412833	1.93826	0.0287474	0.0605915	0.447	4332	tags=49%, list=31%, signal=71%
GOBP_REGULATION_OF_MYOBLAST_FUSION	GOBP_REGULATION_OF_MYOBLAST_FUSION	21	0.674618	1.93813	0.0180723	0.0605099	0.447	3203	tags=81%, list=23%, signal=105%
GOBP_REGULATION_OF_NIK_NF_KAPPAB_SIGNALING	GOBP_REGULATION_OF_NIK_NF_KAPPAB_SIGNALING	92	0.368865	1.93741	0.0178218	0.0605884	0.447	5234	tags=55%, list=38%, signal=88%
GOBP_BONE_REMODELING	GOBP_BONE_REMODELING	84	0.440145	1.93638	0.04158	0.0607703	0.448	1818	tags=31%, list=13%, signal=35%
GOBP_POSITIVE_REGULATION_OF_LYMPHOCYTE_CHEMOTAXIS	GOBP_POSITIVE_REGULATION_OF_LYMPHOCYTE_CHEMOTAXIS	17	0.560289	1.93619	0.0178218	0.0607104	0.448	3244	tags=53%, list=23%, signal=69%
GOBP_B_CELL_HOMEOSTASIS	GOBP_B_CELL_HOMEOSTASIS	38	0.477025	1.93257	0.0526316	0.0616597	0.449	5291	tags=71%, list=38%, signal=114%
GOBP_ACTIN_CYTOSKELETON_REORGANIZATION	GOBP_ACTIN_CYTOSKELETON_REORGANIZATION	109	0.404368	1.93279	0.034413	0.0617171	0.449	2533	tags=35%, list=18%, signal=42%
GOBP_POSITIVE_REGULATION_OF_ANTIGEN_RECEPTOR_MEDIATED_SIGNALING_PATHWAY	GOBP_POSITIVE_REGULATION_OF_ANTIGEN_RECEPTOR_MEDIATED_SIGNALING_PATHWAY	24	0.492374	1.93212	0.0158416	0.0617119	0.453	1885	tags=42%, list=14%, signal=48%
GOBP_VASOCONSTRICTION	GOBP_VASOCONSTRICTION	87	0.402046	1.93151	0.0476191	0.0617951	0.453	4164	tags=45%, list=30%, signal=64%
GOBP_ANTIFUNGAL_INNATE_IMMUNE_RESPONSE	GOBP_ANTIFUNGAL_INNATE_IMMUNE_RESPONSE	16	0.740971	1.93075	0.0252918	0.0618853	0.453	945	tags=56%, list=7%, signal=60%
GOBP_RENAL_TUBULAR_SECRETION	GOBP_RENAL_TUBULAR_SECRETION	26	0.516441	1.93056	0.0137795	0.0618342	0.453	2200	tags=42%, list=16%, signal=50%
GOBP_REGULATION_OF_MONOATOMIC_ION_TRANSPORT	GOBP_REGULATION_OF_MONOATOMIC_ION_TRANSPORT	461	0.339408	1.9292	0.0428571	0.0621547	0.454	3430	tags=39%, list=25%, signal=50%
GOBP_NEGATIVE_REGULATION_OF_CHEMOKINE_PRODUCTION	GOBP_NEGATIVE_REGULATION_OF_CHEMOKINE_PRODUCTION	27	0.510935	1.9286	0.0283401	0.0622353	0.454	2330	tags=41%, list=17%, signal=49%
GOBP_PEPTIDE_CROSS_LINKING	GOBP_PEPTIDE_CROSS_LINKING	31	0.63244	1.9283	0.0105932	0.0622491	0.454	3010	tags=65%, list=22%, signal=82%
GOBP_DETECTION_OF_STIMULUS	GOBP_DETECTION_OF_STIMULUS	115	0.422686	1.92797	0.0235294	0.0622192	0.454	2609	tags=39%, list=19%, signal=48%
GOBP_CD4_POSITIVE_ALPHA_BETA_T_CELL_ACTIVATION	GOBP_CD4_POSITIVE_ALPHA_BETA_T_CELL_ACTIVATION	99	0.392871	1.92758	0.030303	0.0622314	0.454	3132	tags=36%, list=22%, signal=47%
GOBP_ANTIBACTERIAL_HUMORAL_RESPONSE	GOBP_ANTIBACTERIAL_HUMORAL_RESPONSE	28	0.57756	1.92679	0.00607287	0.0623654	0.456	2941	tags=54%, list=21%, signal=68%
GOBP_REGULATION_OF_CYSTEINE_TYPE_ENDOPEPTIDASE_ACTIVITY	GOBP_REGULATION_OF_CYSTEINE_TYPE_ENDOPEPTIDASE_ACTIVITY	204	0.350129	1.92594	0.0123457	0.0625051	0.456	4003	tags=44%, list=29%, signal=61%
GOBP_GLUCOSAMINE_CONTAINING_COMPOUND_METABOLIC_PROCESS	GOBP_GLUCOSAMINE_CONTAINING_COMPOUND_METABOLIC_PROCESS	20	0.565292	1.92538	0.028169	0.0626297	0.457	3281	tags=65%, list=24%, signal=85%
GOBP_REGULATION_OF_SYSTEMIC_ARTERIAL_BLOOD_PRESSURE_BY_HORMONE	GOBP_REGULATION_OF_SYSTEMIC_ARTERIAL_BLOOD_PRESSURE_BY_HORMONE	32	0.583243	1.92285	0.0121951	0.063288	0.46	1453	tags=41%, list=10%, signal=45%
GOBP_INTERFERON_MEDIATED_SIGNALING_PATHWAY	GOBP_INTERFERON_MEDIATED_SIGNALING_PATHWAY	65	0.428444	1.92145	0.0304878	0.0636986	0.46	2506	tags=38%, list=18%, signal=47%
GOBP_RECEPTOR_SIGNALING_PATHWAY_VIA_STAT	GOBP_RECEPTOR_SIGNALING_PATHWAY_VIA_STAT	123	0.370302	1.91914	0.0517598	0.0641729	0.46	1988	tags=30%, list=14%, signal=35%
GOBP_CALCIUM_ION_TRANSMEMBRANE_TRANSPORT	GOBP_CALCIUM_ION_TRANSMEMBRANE_TRANSPORT	251	0.346699	1.92025	0.0476191	0.0639192	0.46	4243	tags=46%, list=30%, signal=65%
GOBP_REGULATION_OF_PATTERN_RECOGNITION_RECEPTOR_SIGNALING_PATHWAY	GOBP_REGULATION_OF_PATTERN_RECOGNITION_RECEPTOR_SIGNALING_PATHWAY	93	0.39686	1.91831	0.0261569	0.06433	0.461	1256	tags=26%, list=9%, signal=28%
GOBP_POSITIVE_REGULATION_OF_NITRIC_OXIDE_METABOLIC_PROCESS	GOBP_POSITIVE_REGULATION_OF_NITRIC_OXIDE_METABOLIC_PROCESS	40	0.469908	1.9183	0.0421687	0.0642133	0.461	2147	tags=40%, list=15%, signal=47%
GOBP_POSITIVE_REGULATION_OF_EXTRINSIC_APOPTOTIC_SIGNALING_PATHWAY	GOBP_POSITIVE_REGULATION_OF_EXTRINSIC_APOPTOTIC_SIGNALING_PATHWAY	57	0.42109	1.9174	0.0289256	0.0644079	0.461	5207	tags=63%, list=37%, signal=100%
GOBP_LAMELLIPODIUM_ASSEMBLY	GOBP_LAMELLIPODIUM_ASSEMBLY	68	0.453531	1.91723	0.0185185	0.0643401	0.461	3692	tags=54%, list=27%, signal=74%
GOBP_REGULATION_OF_ACTIN_FILAMENT_BASED_PROCESS	GOBP_REGULATION_OF_ACTIN_FILAMENT_BASED_PROCESS	369	0.348945	1.91574	0.0567951	0.0646189	0.463	4447	tags=46%, list=32%, signal=66%
GOBP_POSITIVE_REGULATION_OF_TYPE_II_INTERFERON_PRODUCTION	GOBP_POSITIVE_REGULATION_OF_TYPE_II_INTERFERON_PRODUCTION	61	0.468461	1.91583	0.0264228	0.0647076	0.463	2178	tags=38%, list=16%, signal=44%
GOBP_IMMUNOGLOBULIN_PRODUCTION_INVOLVED_IN_IMMUNOGLOBULIN_MEDIATED_IMMUNE_RESPONSE	GOBP_IMMUNOGLOBULIN_PRODUCTION_INVOLVED_IN_IMMUNOGLOBULIN_MEDIATED_IMMUNE_RESPONSE	65	0.38416	1.91462	0.0205339	0.0648612	0.463	1988	tags=28%, list=14%, signal=32%
GOBP_POSITIVE_REGULATION_OF_MONOCYTE_CHEMOTAXIS	GOBP_POSITIVE_REGULATION_OF_MONOCYTE_CHEMOTAXIS	18	0.642354	1.9146	0.0396825	0.0647506	0.463	1262	tags=50%, list=9%, signal=55%
GOBP_REGULATION_OF_ACTIN_CYTOSKELETON_REORGANIZATION	GOBP_REGULATION_OF_ACTIN_CYTOSKELETON_REORGANIZATION	41	0.434787	1.91272	0.0401606	0.065227	0.466	2533	tags=39%, list=18%, signal=48%
GOBP_NEGATIVE_REGULATION_OF_TRANSMEMBRANE_TRANSPORT	GOBP_NEGATIVE_REGULATION_OF_TRANSMEMBRANE_TRANSPORT	123	0.371941	1.91241	0.0237624	0.0652553	0.466	6105	tags=65%, list=44%, signal=115%
GOBP_ADENYLATE_CYCLASE_INHIBITING_G_PROTEIN_COUPLED_RECEPTOR_SIGNALING_PATHWAY	GOBP_ADENYLATE_CYCLASE_INHIBITING_G_PROTEIN_COUPLED_RECEPTOR_SIGNALING_PATHWAY	36	0.486851	1.91137	0.076	0.0653389	0.466	3806	tags=64%, list=27%, signal=88%
GOBP_MUSCLE_ORGAN_MORPHOGENESIS	GOBP_MUSCLE_ORGAN_MORPHOGENESIS	76	0.434042	1.91167	0.0391753	0.0653409	0.466	3396	tags=43%, list=24%, signal=57%
GOBP_RESPONSE_TO_ACETYLCHOLINE	GOBP_RESPONSE_TO_ACETYLCHOLINE	31	0.501474	1.90922	0.0282828	0.0659322	0.466	3396	tags=58%, list=24%, signal=77%
GOBP_REGULATION_OF_EXTRACELLULAR_MATRIX_ORGANIZATION	GOBP_REGULATION_OF_EXTRACELLULAR_MATRIX_ORGANIZATION	56	0.455548	1.90836	0.0628931	0.0659369	0.466	3560	tags=52%, list=26%, signal=69%
GOBP_REGULATION_OF_VASOCONSTRICTION	GOBP_REGULATION_OF_VASOCONSTRICTION	70	0.423192	1.90821	0.0504854	0.065889	0.467	4164	tags=47%, list=30%, signal=67%
GOBP_SUBSTRATE_ADHESION_DEPENDENT_CELL_SPREADING	GOBP_SUBSTRATE_ADHESION_DEPENDENT_CELL_SPREADING	100	0.425098	1.90844	0.0327869	0.0660521	0.466	3709	tags=49%, list=27%, signal=66%
GOBP_REGULATION_OF_SUPEROXIDE_ANION_GENERATION	GOBP_REGULATION_OF_SUPEROXIDE_ANION_GENERATION	24	0.549399	1.90631	0.0241449	0.0663747	0.468	2200	tags=50%, list=16%, signal=59%
GOBP_POSITIVE_REGULATION_OF_MYOBLAST_FUSION	GOBP_POSITIVE_REGULATION_OF_MYOBLAST_FUSION	15	0.728508	1.90604	0.008	0.0663491	0.468	3203	tags=87%, list=23%, signal=112%
GOBP_GLIOGENESIS	GOBP_GLIOGENESIS	314	0.31295	1.90571	0.0307377	0.0663357	0.468	1723	tags=23%, list=12%, signal=25%
GOBP_BLOOD_VESSEL_REMODELING	GOBP_BLOOD_VESSEL_REMODELING	56	0.41394	1.90193	0.0683761	0.067337	0.47	3396	tags=46%, list=24%, signal=61%
GOBP_REGULATION_OF_PLATELET_ACTIVATION	GOBP_REGULATION_OF_PLATELET_ACTIVATION	40	0.521995	1.90177	0.0831601	0.067283	0.47	2698	tags=48%, list=19%, signal=59%
GOBP_FC_RECEPTOR_SIGNALING_PATHWAY	GOBP_FC_RECEPTOR_SIGNALING_PATHWAY	16	0.638773	1.902	0.0059761	0.067444	0.47	1959	tags=56%, list=14%, signal=65%
GOBP_ENDOCYTOSIS	GOBP_ENDOCYTOSIS	487	0.334635	1.90141	0.0326531	0.0672989	0.47	3473	tags=37%, list=25%, signal=48%
GOBP_REGULATION_OF_HOMOTYPIC_CELL_CELL_ADHESION	GOBP_REGULATION_OF_HOMOTYPIC_CELL_CELL_ADHESION	35	0.508241	1.90131	0.0390947	0.0672015	0.47	1897	tags=40%, list=14%, signal=46%
GOBP_T_CELL_DIFFERENTIATION	GOBP_T_CELL_DIFFERENTIATION	271	0.335922	1.89869	0.0666667	0.0678991	0.473	1988	tags=22%, list=14%, signal=25%
GOBP_POSITIVE_REGULATION_OF_ACTIN_FILAMENT_BUNDLE_ASSEMBLY	GOBP_POSITIVE_REGULATION_OF_ACTIN_FILAMENT_BUNDLE_ASSEMBLY	63	0.431567	1.90041	0.0378486	0.0673924	0.471	3447	tags=52%, list=25%, signal=69%
GOBP_REGULATION_OF_ALPHA_BETA_T_CELL_DIFFERENTIATION	GOBP_REGULATION_OF_ALPHA_BETA_T_CELL_DIFFERENTIATION	56	0.465507	1.89782	0.0265849	0.0680706	0.476	3010	tags=38%, list=22%, signal=48%
GOBP_REGULATION_OF_LIPASE_ACTIVITY	GOBP_REGULATION_OF_LIPASE_ACTIVITY	60	0.438135	1.89769	0.0163934	0.0680069	0.477	4741	tags=58%, list=34%, signal=88%
GOBP_GLOMERULUS_DEVELOPMENT	GOBP_GLOMERULUS_DEVELOPMENT	62	0.467156	1.89731	0.0887097	0.0678639	0.477	1841	tags=34%, list=13%, signal=39%
GOBP_CARDIAC_MUSCLE_TISSUE_MORPHOGENESIS	GOBP_CARDIAC_MUSCLE_TISSUE_MORPHOGENESIS	58	0.44564	1.89735	0.033195	0.0679795	0.477	2795	tags=41%, list=20%, signal=52%
GOBP_POSITIVE_REGULATION_OF_PROTEIN_DEPOLYMERIZATION	GOBP_POSITIVE_REGULATION_OF_PROTEIN_DEPOLYMERIZATION	15	0.533734	1.89694	0.0167715	0.0679056	0.477	3095	tags=53%, list=22%, signal=68%
GOBP_PROTEIN_AUTOPROCESSING	GOBP_PROTEIN_AUTOPROCESSING	17	0.548914	1.89652	0.00409836	0.0679308	0.477	3211	tags=59%, list=23%, signal=76%
GOBP_GLYCOPROTEIN_BIOSYNTHETIC_PROCESS	GOBP_GLYCOPROTEIN_BIOSYNTHETIC_PROCESS	242	0.321921	1.8964	0.014433	0.067859	0.477	5403	tags=56%, list=39%, signal=90%
GOBP_MAINTENANCE_OF_LOCATION_IN_CELL	GOBP_MAINTENANCE_OF_LOCATION_IN_CELL	195	0.34047	1.89539	0.0628803	0.0680324	0.477	3527	tags=39%, list=25%, signal=51%
GOBP_NEGATIVE_REGULATION_OF_LEUKOCYTE_APOPTOTIC_PROCESS	GOBP_NEGATIVE_REGULATION_OF_LEUKOCYTE_APOPTOTIC_PROCESS	55	0.427123	1.89618	0.0204082	0.0678344	0.477	4753	tags=56%, list=34%, signal=85%
GOBP_REGULATION_OF_SUPEROXIDE_METABOLIC_PROCESS	GOBP_REGULATION_OF_SUPEROXIDE_METABOLIC_PROCESS	30	0.524083	1.895	0.0265306	0.0680222	0.477	2200	tags=47%, list=16%, signal=55%
GOBP_NEGATIVE_REGULATION_OF_DNA_BINDING	GOBP_NEGATIVE_REGULATION_OF_DNA_BINDING	54	0.420995	1.89487	0.012766	0.0679316	0.477	2501	tags=35%, list=18%, signal=43%
GOBP_REGULATION_OF_NLRP3_INFLAMMASOME_COMPLEX_ASSEMBLY	GOBP_REGULATION_OF_NLRP3_INFLAMMASOME_COMPLEX_ASSEMBLY	26	0.510287	1.89458	0.0306748	0.0679082	0.477	586	tags=31%, list=4%, signal=32%
GOBP_POSITIVE_REGULATION_OF_ENDOTHELIAL_CELL_APOPTOTIC_PROCESS	GOBP_POSITIVE_REGULATION_OF_ENDOTHELIAL_CELL_APOPTOTIC_PROCESS	15	0.556756	1.89453	0.0253411	0.0678013	0.477	2898	tags=53%, list=21%, signal=67%
GOBP_VASCULOGENESIS	GOBP_VASCULOGENESIS	81	0.447121	1.89419	0.088843	0.0676582	0.477	2844	tags=43%, list=20%, signal=54%
GOBP_CARDIAC_VENTRICLE_MORPHOGENESIS	GOBP_CARDIAC_VENTRICLE_MORPHOGENESIS	58	0.400223	1.89439	0.0328542	0.0677148	0.477	3017	tags=40%, list=22%, signal=50%
GOBP_POSITIVE_REGULATION_OF_NF_KAPPAB_TRANSCRIPTION_FACTOR_ACTIVITY	GOBP_POSITIVE_REGULATION_OF_NF_KAPPAB_TRANSCRIPTION_FACTOR_ACTIVITY	133	0.34855	1.89372	0.0378486	0.0676847	0.477	5326	tags=54%, list=38%, signal=87%
GOBP_PROTEIN_NITROSYLATION	GOBP_PROTEIN_NITROSYLATION	15	0.538233	1.89347	0.0240481	0.0676474	0.477	1030	tags=27%, list=7%, signal=29%
GOBP_REGULATION_OF_CELL_MIGRATION_INVOLVED_IN_SPROUTING_ANGIOGENESIS	GOBP_REGULATION_OF_CELL_MIGRATION_INVOLVED_IN_SPROUTING_ANGIOGENESIS	38	0.508641	1.89314	0.0351967	0.0676415	0.477	2441	tags=45%, list=18%, signal=54%
GOBP_REGULATION_OF_VESICLE_MEDIATED_TRANSPORT	GOBP_REGULATION_OF_VESICLE_MEDIATED_TRANSPORT	491	0.323074	1.89249	0.0366599	0.0677489	0.477	4238	tags=43%, list=30%, signal=59%
GOBP_LEUKOCYTE_AGGREGATION	GOBP_LEUKOCYTE_AGGREGATION	17	0.688213	1.89233	0.0257937	0.0676834	0.477	2661	tags=71%, list=19%, signal=87%
GOBP_MONOAMINE_TRANSPORT	GOBP_MONOAMINE_TRANSPORT	70	0.45909	1.89216	0.0218254	0.0676211	0.477	3744	tags=47%, list=27%, signal=64%
GOBP_VENTRICULAR_TRABECULA_MYOCARDIUM_MORPHOGENESIS	GOBP_VENTRICULAR_TRABECULA_MYOCARDIUM_MORPHOGENESIS	15	0.636355	1.89194	0.00823045	0.067573	0.477	2795	tags=60%, list=20%, signal=75%
GOBP_T_CELL_MEDIATED_CYTOTOXICITY	GOBP_T_CELL_MEDIATED_CYTOTOXICITY	49	0.448198	1.89142	0.0367505	0.0676499	0.477	2293	tags=41%, list=16%, signal=49%
GOBP_COLLAGEN_FIBRIL_ORGANIZATION	GOBP_COLLAGEN_FIBRIL_ORGANIZATION	55	0.535744	1.89045	0.0880626	0.0677288	0.477	2738	tags=56%, list=20%, signal=70%
GOBP_INFLAMMATORY_RESPONSE_TO_WOUNDING	GOBP_INFLAMMATORY_RESPONSE_TO_WOUNDING	19	0.567066	1.89134	0.0339321	0.067565	0.477	907	tags=37%, list=7%, signal=39%
GOBP_REGULATION_OF_BONE_RESORPTION	GOBP_REGULATION_OF_BONE_RESORPTION	39	0.477965	1.88966	0.0796813	0.0677722	0.479	1696	tags=36%, list=12%, signal=41%
GOBP_NEGATIVE_REGULATION_OF_MONOATOMIC_ION_TRANSMEMBRANE_TRANSPORT	GOBP_NEGATIVE_REGULATION_OF_MONOATOMIC_ION_TRANSMEMBRANE_TRANSPORT	90	0.370391	1.88972	0.0236686	0.0678616	0.479	6029	tags=66%, list=43%, signal=115%
GOBP_POSITIVE_REGULATION_OF_CALCIUM_ION_TRANSPORT	GOBP_POSITIVE_REGULATION_OF_CALCIUM_ION_TRANSPORT	111	0.39633	1.88966	0.0333988	0.0676567	0.479	3396	tags=46%, list=24%, signal=60%
GOBP_NEGATIVE_REGULATION_OF_INTERLEUKIN_2_PRODUCTION	GOBP_NEGATIVE_REGULATION_OF_INTERLEUKIN_2_PRODUCTION	21	0.528107	1.88929	0.0321285	0.067652	0.479	2334	tags=43%, list=17%, signal=51%
GOBP_MYELOID_CELL_DIFFERENTIATION	GOBP_MYELOID_CELL_DIFFERENTIATION	406	0.320588	1.88856	0.0591837	0.0676821	0.479	4042	tags=39%, list=29%, signal=53%
GOBP_REGULATION_OF_INFLAMMATORY_RESPONSE_TO_ANTIGENIC_STIMULUS	GOBP_REGULATION_OF_INFLAMMATORY_RESPONSE_TO_ANTIGENIC_STIMULUS	23	0.542984	1.88859	0.0318725	0.0677867	0.479	630	tags=35%, list=5%, signal=36%
GOBP_REGULATION_OF_LEUKOCYTE_APOPTOTIC_PROCESS	GOBP_REGULATION_OF_LEUKOCYTE_APOPTOTIC_PROCESS	91	0.403756	1.88799	0.026971	0.0677305	0.479	4816	tags=53%, list=35%, signal=80%
GOBP_POSITIVE_REGULATION_OF_GLIAL_CELL_PROLIFERATION	GOBP_POSITIVE_REGULATION_OF_GLIAL_CELL_PROLIFERATION	25	0.459349	1.8872	0.0102669	0.0678903	0.481	3047	tags=48%, list=22%, signal=61%
GOBP_ENTRY_INTO_HOST	GOBP_ENTRY_INTO_HOST	82	0.377347	1.88607	0.0452756	0.0681689	0.481	2772	tags=35%, list=20%, signal=44%
GOBP_REGULATION_OF_ACUTE_INFLAMMATORY_RESPONSE	GOBP_REGULATION_OF_ACUTE_INFLAMMATORY_RESPONSE	32	0.602166	1.88464	0.0358566	0.0684992	0.481	1481	tags=44%, list=11%, signal=49%
GOBP_REGULATION_OF_MONOATOMIC_ION_TRANSMEMBRANE_TRANSPORT	GOBP_REGULATION_OF_MONOATOMIC_ION_TRANSMEMBRANE_TRANSPORT	353	0.345991	1.88427	0.0408163	0.0684954	0.481	3430	tags=40%, list=25%, signal=52%
GOBP_EXOCYTIC_PROCESS	GOBP_EXOCYTIC_PROCESS	80	0.332743	1.8841	0.0347648	0.0684547	0.481	2046	tags=26%, list=15%, signal=31%
GOBP_NEGATIVE_REGULATION_OF_SYSTEMIC_ARTERIAL_BLOOD_PRESSURE	GOBP_NEGATIVE_REGULATION_OF_SYSTEMIC_ARTERIAL_BLOOD_PRESSURE	23	0.494969	1.88398	0.0119048	0.0683983	0.481	1828	tags=35%, list=13%, signal=40%
GOBP_SMOOTH_MUSCLE_CELL_PROLIFERATION	GOBP_SMOOTH_MUSCLE_CELL_PROLIFERATION	173	0.359735	1.88358	0.043299	0.0684513	0.484	3850	tags=43%, list=28%, signal=58%
GOBP_PROTEIN_HYDROXYLATION	GOBP_PROTEIN_HYDROXYLATION	28	0.498832	1.88344	0.00400802	0.068399	0.484	2977	tags=57%, list=21%, signal=73%
GOBP_CALCIUM_ION_TRANSMEMBRANE_IMPORT_INTO_CYTOSOL	GOBP_CALCIUM_ION_TRANSMEMBRANE_IMPORT_INTO_CYTOSOL	146	0.399712	1.883	0.0537849	0.0683225	0.484	4243	tags=50%, list=30%, signal=71%
GOBP_MYD88_DEPENDENT_TOLL_LIKE_RECEPTOR_SIGNALING_PATHWAY	GOBP_MYD88_DEPENDENT_TOLL_LIKE_RECEPTOR_SIGNALING_PATHWAY	18	0.691483	1.883	0.042	0.0684364	0.484	2781	tags=72%, list=20%, signal=90%
GOBP_NEGATIVE_REGULATION_OF_CYSTEINE_TYPE_ENDOPEPTIDASE_ACTIVITY_INVOLVED_IN_APOPTOTIC_PROCESS	GOBP_NEGATIVE_REGULATION_OF_CYSTEINE_TYPE_ENDOPEPTIDASE_ACTIVITY_INVOLVED_IN_APOPTOTIC_PROCESS	65	0.373621	1.88239	0.0139721	0.0684179	0.488	5137	tags=58%, list=37%, signal=92%
GOBP_REGULATION_OF_BLOOD_VESSEL_ENDOTHELIAL_CELL_MIGRATION	GOBP_REGULATION_OF_BLOOD_VESSEL_ENDOTHELIAL_CELL_MIGRATION	89	0.436092	1.88124	0.0523013	0.068554	0.489	3412	tags=46%, list=24%, signal=61%
GOBP_REGULATION_OF_EXOCYTOSIS	GOBP_REGULATION_OF_EXOCYTOSIS	168	0.313118	1.88179	0.0287474	0.0684943	0.489	2081	tags=26%, list=15%, signal=30%
GOBP_REGULATION_OF_ANATOMICAL_STRUCTURE_SIZE	GOBP_REGULATION_OF_ANATOMICAL_STRUCTURE_SIZE	477	0.317202	1.88054	0.0649087	0.0685111	0.489	4499	tags=43%, list=32%, signal=62%
GOBP_NATURAL_KILLER_CELL_ACTIVATION	GOBP_NATURAL_KILLER_CELL_ACTIVATION	71	0.382292	1.88072	0.0340681	0.0685721	0.489	1298	tags=23%, list=9%, signal=25%
GOBP_POSITIVE_REGULATION_OF_CD4_POSITIVE_ALPHA_BETA_T_CELL_DIFFERENTIATION	GOBP_POSITIVE_REGULATION_OF_CD4_POSITIVE_ALPHA_BETA_T_CELL_DIFFERENTIATION	23	0.592749	1.87985	0.0244399	0.0686213	0.489	1172	tags=39%, list=8%, signal=43%
GOBP_AMINOGLYCAN_CATABOLIC_PROCESS	GOBP_AMINOGLYCAN_CATABOLIC_PROCESS	27	0.544087	1.87889	0.0409836	0.0688992	0.489	3278	tags=56%, list=24%, signal=73%
GOBP_CARDIAC_NEURAL_CREST_CELL_DIFFERENTIATION_INVOLVED_IN_HEART_DEVELOPMENT	GOBP_CARDIAC_NEURAL_CREST_CELL_DIFFERENTIATION_INVOLVED_IN_HEART_DEVELOPMENT	18	0.515139	1.87858	0.00642398	0.0688892	0.489	3529	tags=56%, list=25%, signal=74%
GOBP_NEGATIVE_REGULATION_OF_RESPONSE_TO_OXIDATIVE_STRESS	GOBP_NEGATIVE_REGULATION_OF_RESPONSE_TO_OXIDATIVE_STRESS	27	0.478299	1.87792	0.00402414	0.0689802	0.489	3048	tags=52%, list=22%, signal=66%
GOBP_POSITIVE_REGULATION_OF_MONOATOMIC_ION_TRANSPORT	GOBP_POSITIVE_REGULATION_OF_MONOATOMIC_ION_TRANSPORT	207	0.350332	1.87702	0.0418327	0.0692292	0.492	3412	tags=41%, list=24%, signal=54%
GOBP_REGULATION_OF_SMOOTH_MUSCLE_CONTRACTION	GOBP_REGULATION_OF_SMOOTH_MUSCLE_CONTRACTION	54	0.439112	1.87663	0.0484496	0.0692448	0.492	2081	tags=35%, list=15%, signal=41%
GOBP_NEGATIVE_REGULATION_OF_T_CELL_RECEPTOR_SIGNALING_PATHWAY	GOBP_NEGATIVE_REGULATION_OF_T_CELL_RECEPTOR_SIGNALING_PATHWAY	19	0.518983	1.87649	0.0295276	0.0691659	0.492	2376	tags=47%, list=17%, signal=57%
GOBP_MAST_CELL_MIGRATION	GOBP_MAST_CELL_MIGRATION	16	0.580566	1.87634	0.0423892	0.069093	0.492	3935	tags=69%, list=28%, signal=96%
GOBP_INFLAMMASOME_COMPLEX_ASSEMBLY	GOBP_INFLAMMASOME_COMPLEX_ASSEMBLY	30	0.507534	1.87622	0.0321932	0.0690108	0.492	2312	tags=43%, list=17%, signal=52%
GOBP_EOSINOPHIL_MIGRATION	GOBP_EOSINOPHIL_MIGRATION	19	0.74099	1.87432	0	0.0695581	0.492	559	tags=47%, list=4%, signal=49%
GOBP_MONOATOMIC_ANION_HOMEOSTASIS	GOBP_MONOATOMIC_ANION_HOMEOSTASIS	17	0.606279	1.87359	0.0100402	0.069682	0.492	3244	tags=65%, list=23%, signal=84%
GOBP_REGULATION_OF_MONOATOMIC_CATION_TRANSMEMBRANE_TRANSPORT	GOBP_REGULATION_OF_MONOATOMIC_CATION_TRANSMEMBRANE_TRANSPORT	284	0.334081	1.8732	0.0408163	0.0697376	0.492	3421	tags=40%, list=25%, signal=52%
GOBP_POSITIVE_REGULATION_OF_BLOOD_CIRCULATION	GOBP_POSITIVE_REGULATION_OF_BLOOD_CIRCULATION	36	0.503445	1.87306	0.00578035	0.0696725	0.492	2034	tags=36%, list=15%, signal=42%
GOBP_ANTIGEN_PROCESSING_AND_PRESENTATION_OF_EXOGENOUS_ANTIGEN	GOBP_ANTIGEN_PROCESSING_AND_PRESENTATION_OF_EXOGENOUS_ANTIGEN	29	0.559115	1.87277	0.0135135	0.0696344	0.492	1937	tags=48%, list=14%, signal=56%
GOBP_SUPPRESSION_OF_VIRAL_RELEASE_BY_HOST	GOBP_SUPPRESSION_OF_VIRAL_RELEASE_BY_HOST	21	0.483154	1.87185	0.0390625	0.069859	0.492	4147	tags=62%, list=30%, signal=88%
GOBP_RENAL_SYSTEM_PROCESS	GOBP_RENAL_SYSTEM_PROCESS	101	0.399041	1.87034	0.0459082	0.070216	0.494	2200	tags=30%, list=16%, signal=35%
GOBP_RECEPTOR_MEDIATED_ENDOCYTOSIS	GOBP_RECEPTOR_MEDIATED_ENDOCYTOSIS	228	0.340931	1.86989	0.049896	0.0702116	0.494	3086	tags=35%, list=22%, signal=44%
GOBP_NEGATIVE_REGULATION_OF_MONONUCLEAR_CELL_MIGRATION	GOBP_NEGATIVE_REGULATION_OF_MONONUCLEAR_CELL_MIGRATION	18	0.549012	1.86987	0.0221774	0.0701156	0.494	1534	tags=39%, list=11%, signal=44%
GOBP_POSITIVE_REGULATION_OF_GRANULOCYTE_CHEMOTAXIS	GOBP_POSITIVE_REGULATION_OF_GRANULOCYTE_CHEMOTAXIS	28	0.586615	1.86974	0.0439771	0.0700567	0.494	3396	tags=64%, list=24%, signal=85%
GOBP_POSITIVE_REGULATION_OF_SMOOTH_MUSCLE_CELL_PROLIFERATION	GOBP_POSITIVE_REGULATION_OF_SMOOTH_MUSCLE_CELL_PROLIFERATION	103	0.385761	1.86762	0.0695296	0.0706569	0.496	3482	tags=41%, list=25%, signal=54%
GOBP_AMINOGLYCAN_METABOLIC_PROCESS	GOBP_AMINOGLYCAN_METABOLIC_PROCESS	96	0.395523	1.86684	0.0898204	0.0708804	0.496	2539	tags=38%, list=18%, signal=46%
GOBP_GLIAL_CELL_MIGRATION	GOBP_GLIAL_CELL_MIGRATION	64	0.409072	1.86682	0.0528455	0.0707747	0.496	2527	tags=38%, list=18%, signal=46%
GOBP_MATURE_B_CELL_DIFFERENTIATION_INVOLVED_IN_IMMUNE_RESPONSE	GOBP_MATURE_B_CELL_DIFFERENTIATION_INVOLVED_IN_IMMUNE_RESPONSE	25	0.517575	1.86661	0.0557769	0.0707281	0.496	1848	tags=40%, list=13%, signal=46%
GOBP_POSITIVE_REGULATION_OF_RELEASE_OF_SEQUESTERED_CALCIUM_ION_INTO_CYTOSOL	GOBP_POSITIVE_REGULATION_OF_RELEASE_OF_SEQUESTERED_CALCIUM_ION_INTO_CYTOSOL	33	0.47439	1.86865	0.034413	0.0703186	0.496	3396	tags=55%, list=24%, signal=72%
GOBP_ADULT_LOCOMOTORY_BEHAVIOR	GOBP_ADULT_LOCOMOTORY_BEHAVIOR	83	0.33993	1.86531	0.0323887	0.0711151	0.501	2546	tags=33%, list=18%, signal=40%
GOBP_HOMEOSTASIS_OF_NUMBER_OF_CELLS_WITHIN_A_TISSUE	GOBP_HOMEOSTASIS_OF_NUMBER_OF_CELLS_WITHIN_A_TISSUE	39	0.460952	1.86328	0.0270833	0.0716567	0.501	3790	tags=49%, list=27%, signal=67%
GOBP_MUSCLE_CELL_PROLIFERATION	GOBP_MUSCLE_CELL_PROLIFERATION	233	0.339373	1.86293	0.0390144	0.0716468	0.502	3850	tags=41%, list=28%, signal=55%
GOBP_REGULATION_OF_MEMBRANE_PROTEIN_ECTODOMAIN_PROTEOLYSIS	GOBP_REGULATION_OF_MEMBRANE_PROTEIN_ECTODOMAIN_PROTEOLYSIS	20	0.513948	1.8628	0.00412371	0.0715754	0.502	3423	tags=55%, list=25%, signal=73%
GOBP_REGULATION_OF_RHO_PROTEIN_SIGNAL_TRANSDUCTION	GOBP_REGULATION_OF_RHO_PROTEIN_SIGNAL_TRANSDUCTION	80	0.413856	1.86156	0.0710059	0.0717834	0.507	3149	tags=41%, list=23%, signal=53%
GOBP_POSITIVE_REGULATION_OF_INTERLEUKIN_12_PRODUCTION	GOBP_POSITIVE_REGULATION_OF_INTERLEUKIN_12_PRODUCTION	32	0.589424	1.86194	0.0335306	0.0717269	0.507	3013	tags=56%, list=22%, signal=72%
GOBP_TYPE_2_IMMUNE_RESPONSE	GOBP_TYPE_2_IMMUNE_RESPONSE	37	0.451101	1.86155	0.0263158	0.0716737	0.507	4074	tags=51%, list=29%, signal=72%
GOBP_EPITHELIAL_TO_MESENCHYMAL_TRANSITION_INVOLVED_IN_ENDOCARDIAL_CUSHION_FORMATION	GOBP_EPITHELIAL_TO_MESENCHYMAL_TRANSITION_INVOLVED_IN_ENDOCARDIAL_CUSHION_FORMATION	19	0.525198	1.86055	0.033195	0.071888	0.507	2795	tags=47%, list=20%, signal=59%
GOBP_REGULATION_OF_PH	GOBP_REGULATION_OF_PH	83	0.374389	1.86022	0.0332681	0.0718592	0.507	7328	tags=77%, list=53%, signal=162%
GOBP_ARTERY_MORPHOGENESIS	GOBP_ARTERY_MORPHOGENESIS	72	0.42998	1.85859	0.0899796	0.0723048	0.507	2838	tags=38%, list=20%, signal=47%
GOBP_GLYCOSYL_COMPOUND_CATABOLIC_PROCESS	GOBP_GLYCOSYL_COMPOUND_CATABOLIC_PROCESS	24	0.570445	1.85961	0.00195695	0.07199	0.507	3093	tags=63%, list=22%, signal=80%
GOBP_AXON_REGENERATION	GOBP_AXON_REGENERATION	48	0.412797	1.85851	0.0207039	0.07222	0.507	2096	tags=33%, list=15%, signal=39%
GOBP_NEGATIVE_REGULATION_OF_PRODUCTION_OF_MOLECULAR_MEDIATOR_OF_IMMUNE_RESPONSE	GOBP_NEGATIVE_REGULATION_OF_PRODUCTION_OF_MOLECULAR_MEDIATOR_OF_IMMUNE_RESPONSE	35	0.46571	1.85817	0.0421941	0.072224	0.507	3137	tags=49%, list=23%, signal=63%
GOBP_NUCLEOSIDE_CATABOLIC_PROCESS	GOBP_NUCLEOSIDE_CATABOLIC_PROCESS	16	0.619576	1.85808	0	0.0721338	0.507	2926	tags=63%, list=21%, signal=79%
GOBP_POSITIVE_REGULATION_OF_HYDROLASE_ACTIVITY	GOBP_POSITIVE_REGULATION_OF_HYDROLASE_ACTIVITY	477	0.312585	1.85714	0.0589431	0.0723161	0.507	3466	tags=34%, list=25%, signal=43%
GOBP_MYOBLAST_PROLIFERATION	GOBP_MYOBLAST_PROLIFERATION	26	0.513691	1.85727	0.0102669	0.0723706	0.507	2214	tags=38%, list=16%, signal=46%
GOBP_LAMELLIPODIUM_ORGANIZATION	GOBP_LAMELLIPODIUM_ORGANIZATION	85	0.443144	1.85697	0.0185185	0.0722965	0.507	3692	tags=53%, list=27%, signal=72%
GOBP_POSITIVE_REGULATION_OF_ALPHA_BETA_T_CELL_ACTIVATION	GOBP_POSITIVE_REGULATION_OF_ALPHA_BETA_T_CELL_ACTIVATION	62	0.435068	1.85578	0.0318091	0.0725949	0.507	3709	tags=48%, list=27%, signal=66%
GOBP_ADENYLATE_CYCLASE_ACTIVATING_G_PROTEIN_COUPLED_RECEPTOR_SIGNALING_PATHWAY	GOBP_ADENYLATE_CYCLASE_ACTIVATING_G_PROTEIN_COUPLED_RECEPTOR_SIGNALING_PATHWAY	93	0.462227	1.85501	0.0235756	0.0727415	0.507	2547	tags=38%, list=18%, signal=46%
GOBP_REGULATION_OF_LYMPHOCYTE_DIFFERENTIATION	GOBP_REGULATION_OF_LYMPHOCYTE_DIFFERENTIATION	184	0.340324	1.85296	0.0680412	0.0733027	0.507	2707	tags=28%, list=19%, signal=34%
GOBP_TOLERANCE_INDUCTION	GOBP_TOLERANCE_INDUCTION	20	0.580499	1.85436	0.0419162	0.0728717	0.507	3488	tags=65%, list=25%, signal=87%
GOBP_REGULATION_OF_LYMPHOCYTE_CHEMOTAXIS	GOBP_REGULATION_OF_LYMPHOCYTE_CHEMOTAXIS	21	0.500584	1.85221	0.0335968	0.0734825	0.507	3244	tags=48%, list=23%, signal=62%
GOBP_NEGATIVE_REGULATION_OF_PEPTIDYL_TYROSINE_PHOSPHORYLATION	GOBP_NEGATIVE_REGULATION_OF_PEPTIDYL_TYROSINE_PHOSPHORYLATION	54	0.408784	1.85221	0.0411523	0.0733715	0.507	1989	tags=33%, list=14%, signal=39%
GOBP_REGULATION_OF_T_CELL_CHEMOTAXIS	GOBP_REGULATION_OF_T_CELL_CHEMOTAXIS	15	0.538349	1.85207	0.024	0.0733237	0.507	3244	tags=53%, list=23%, signal=69%
GOBP_POSITIVE_REGULATION_OF_LYMPHOCYTE_DIFFERENTIATION	GOBP_POSITIVE_REGULATION_OF_LYMPHOCYTE_DIFFERENTIATION	117	0.362576	1.84973	0.0515464	0.0739441	0.513	3016	tags=32%, list=22%, signal=40%
GOBP_REGULATION_OF_TISSUE_REMODELING	GOBP_REGULATION_OF_TISSUE_REMODELING	69	0.415536	1.84934	0.0795918	0.0739639	0.513	2804	tags=39%, list=20%, signal=49%
GOBP_T_HELPER_1_TYPE_IMMUNE_RESPONSE	GOBP_T_HELPER_1_TYPE_IMMUNE_RESPONSE	41	0.471809	1.85062	0.0219561	0.0737335	0.513	1923	tags=39%, list=14%, signal=45%
GOBP_GLUCOCORTICOID_METABOLIC_PROCESS	GOBP_GLUCOCORTICOID_METABOLIC_PROCESS	17	0.493361	1.84921	0.00392927	0.073904	0.513	102	tags=18%, list=1%, signal=18%
GOBP_RECEPTOR_CLUSTERING	GOBP_RECEPTOR_CLUSTERING	59	0.412872	1.84864	0.0446247	0.073992	0.513	2788	tags=41%, list=20%, signal=51%
GOBP_NEGATIVE_REGULATION_OF_BINDING	GOBP_NEGATIVE_REGULATION_OF_BINDING	157	0.343938	1.84846	0.0165289	0.0739514	0.513	2511	tags=31%, list=18%, signal=37%
GOBP_POSITIVE_REGULATION_OF_CELL_MATRIX_ADHESION	GOBP_POSITIVE_REGULATION_OF_CELL_MATRIX_ADHESION	62	0.396374	1.84841	0.0308642	0.0738523	0.513	3298	tags=44%, list=24%, signal=57%
GOBP_POSITIVE_REGULATION_OF_SUPRAMOLECULAR_FIBER_ORGANIZATION	GOBP_POSITIVE_REGULATION_OF_SUPRAMOLECULAR_FIBER_ORGANIZATION	164	0.363539	1.84768	0.0365854	0.0739859	0.513	3730	tags=44%, list=27%, signal=59%
GOBP_PYROPTOSIS	GOBP_PYROPTOSIS	26	0.69741	1.8473	0.00389864	0.0740261	0.513	2658	tags=73%, list=19%, signal=90%
GOBP_REGULATION_OF_B_CELL_DIFFERENTIATION	GOBP_REGULATION_OF_B_CELL_DIFFERENTIATION	32	0.46776	1.84718	0.041502	0.0739531	0.513	2476	tags=41%, list=18%, signal=49%
GOBP_POSITIVE_REGULATION_OF_RELEASE_OF_CYTOCHROME_C_FROM_MITOCHONDRIA	GOBP_POSITIVE_REGULATION_OF_RELEASE_OF_CYTOCHROME_C_FROM_MITOCHONDRIA	28	0.493518	1.84707	0.0224949	0.0739013	0.513	3378	tags=57%, list=24%, signal=75%
GOBP_OLIGOSACCHARIDE_METABOLIC_PROCESS	GOBP_OLIGOSACCHARIDE_METABOLIC_PROCESS	40	0.459827	1.84682	0.0471311	0.0738717	0.514	3951	tags=58%, list=28%, signal=80%
GOBP_POSITIVE_REGULATION_OF_CYTOKINE_PRODUCTION_INVOLVED_IN_INFLAMMATORY_RESPONSE	GOBP_POSITIVE_REGULATION_OF_CYTOKINE_PRODUCTION_INVOLVED_IN_INFLAMMATORY_RESPONSE	19	0.493789	1.84545	0.032	0.0742817	0.514	945	tags=37%, list=7%, signal=39%
GOBP_ATRIAL_CARDIAC_MUSCLE_TISSUE_DEVELOPMENT	GOBP_ATRIAL_CARDIAC_MUSCLE_TISSUE_DEVELOPMENT	15	0.721616	1.84517	0	0.0742786	0.514	3396	tags=73%, list=24%, signal=97%
GOBP_POSITIVE_REGULATION_OF_VASCULAR_ENDOTHELIAL_GROWTH_FACTOR_PRODUCTION	GOBP_POSITIVE_REGULATION_OF_VASCULAR_ENDOTHELIAL_GROWTH_FACTOR_PRODUCTION	21	0.521008	1.84453	0.0240481	0.0744109	0.514	2081	tags=43%, list=15%, signal=50%
GOBP_POSITIVE_REGULATION_OF_IMMUNOGLOBULIN_PRODUCTION	GOBP_POSITIVE_REGULATION_OF_IMMUNOGLOBULIN_PRODUCTION	44	0.404393	1.844	0.0162272	0.0744876	0.514	1172	tags=23%, list=8%, signal=25%
GOBP_REGULATION_OF_CD8_POSITIVE_ALPHA_BETA_T_CELL_ACTIVATION	GOBP_REGULATION_OF_CD8_POSITIVE_ALPHA_BETA_T_CELL_ACTIVATION	17	0.611244	1.84398	0.0176817	0.0743847	0.514	1801	tags=41%, list=13%, signal=47%
GOBP_REGULATION_OF_BONE_REMODELING	GOBP_REGULATION_OF_BONE_REMODELING	49	0.452619	1.84362	0.0753564	0.0742781	0.515	1740	tags=33%, list=12%, signal=37%
GOBP_MITOCHONDRIAL_DEPOLARIZATION	GOBP_MITOCHONDRIAL_DEPOLARIZATION	21	0.538621	1.84367	0	0.0743736	0.515	4047	tags=71%, list=29%, signal=101%
GOBP_NEGATIVE_REGULATION_OF_MONOATOMIC_ION_TRANSPORT	GOBP_NEGATIVE_REGULATION_OF_MONOATOMIC_ION_TRANSPORT	120	0.340268	1.84357	0.0359281	0.0741897	0.515	5933	tags=60%, list=43%, signal=104%
GOBP_NEGATIVE_REGULATION_OF_NITRIC_OXIDE_METABOLIC_PROCESS	GOBP_NEGATIVE_REGULATION_OF_NITRIC_OXIDE_METABOLIC_PROCESS	16	0.50232	1.84343	0.0304878	0.0741194	0.515	3322	tags=56%, list=24%, signal=74%
GOBP_POSITIVE_REGULATION_OF_CELL_ADHESION_MEDIATED_BY_INTEGRIN	GOBP_POSITIVE_REGULATION_OF_CELL_ADHESION_MEDIATED_BY_INTEGRIN	22	0.584726	1.84327	0.0356436	0.0740655	0.515	2241	tags=50%, list=16%, signal=59%
GOBP_PHAGOCYTOSIS_RECOGNITION	GOBP_PHAGOCYTOSIS_RECOGNITION	24	0.732668	1.84232	0.0121704	0.0743669	0.515	2166	tags=75%, list=16%, signal=89%
GOBP_REGULATION_OF_TRANSMEMBRANE_TRANSPORT	GOBP_REGULATION_OF_TRANSMEMBRANE_TRANSPORT	467	0.31343	1.84188	0.0523139	0.0743153	0.515	3430	tags=37%, list=25%, signal=47%
GOBP_B_CELL_ACTIVATION_INVOLVED_IN_IMMUNE_RESPONSE	GOBP_B_CELL_ACTIVATION_INVOLVED_IN_IMMUNE_RESPONSE	76	0.364671	1.8413	0.0698603	0.0744312	0.515	1988	tags=26%, list=14%, signal=31%
GOBP_REGULATION_OF_CELL_SUBSTRATE_ADHESION	GOBP_REGULATION_OF_CELL_SUBSTRATE_ADHESION	204	0.376085	1.84189	0.0461216	0.0744128	0.515	3224	tags=38%, list=23%, signal=49%
GOBP_REGULATION_OF_NUCLEASE_ACTIVITY	GOBP_REGULATION_OF_NUCLEASE_ACTIVITY	25	0.457313	1.84088	0.0433071	0.074472	0.515	1489	tags=32%, list=11%, signal=36%
GOBP_SMOOTH_MUSCLE_TISSUE_DEVELOPMENT	GOBP_SMOOTH_MUSCLE_TISSUE_DEVELOPMENT	26	0.461315	1.84071	0.0622568	0.0743328	0.515	1780	tags=35%, list=13%, signal=40%
GOBP_ANTIGEN_PROCESSING_AND_PRESENTATION_OF_EXOGENOUS_PEPTIDE_ANTIGEN_VIA_MHC_CLASS_II	GOBP_ANTIGEN_PROCESSING_AND_PRESENTATION_OF_EXOGENOUS_PEPTIDE_ANTIGEN_VIA_MHC_CLASS_II	15	0.730011	1.84077	0.0229446	0.0743965	0.515	2379	tags=80%, list=17%, signal=96%
GOBP_CD4_POSITIVE_ALPHA_BETA_T_CELL_DIFFERENTIATION	GOBP_CD4_POSITIVE_ALPHA_BETA_T_CELL_DIFFERENTIATION	73	0.419636	1.84006	0.0404858	0.0744501	0.515	1988	tags=27%, list=14%, signal=32%
GOBP_REGENERATION	GOBP_REGENERATION	131	0.353094	1.8398	0.0433884	0.0744596	0.517	2214	tags=31%, list=16%, signal=36%
GOBP_MACROPHAGE_ACTIVATION_INVOLVED_IN_IMMUNE_RESPONSE	GOBP_MACROPHAGE_ACTIVATION_INVOLVED_IN_IMMUNE_RESPONSE	17	0.58856	1.83962	0.0330097	0.0744058	0.517	1895	tags=53%, list=14%, signal=61%
GOBP_POSITIVE_REGULATION_OF_SECRETION	GOBP_POSITIVE_REGULATION_OF_SECRETION	308	0.29699	1.83943	0.0284553	0.0743406	0.517	2241	tags=24%, list=16%, signal=28%
GOBP_POSITIVE_REGULATION_OF_LIPASE_ACTIVITY	GOBP_POSITIVE_REGULATION_OF_LIPASE_ACTIVITY	43	0.450925	1.83802	0.0265306	0.0746679	0.52	4965	tags=63%, list=36%, signal=97%
GOBP_HEMATOPOIETIC_STEM_CELL_HOMEOSTASIS	GOBP_HEMATOPOIETIC_STEM_CELL_HOMEOSTASIS	28	0.431384	1.83727	0.0541082	0.0747697	0.52	1531	tags=32%, list=11%, signal=36%
GOBP_POSTSYNAPTIC_SIGNAL_TRANSDUCTION	GOBP_POSTSYNAPTIC_SIGNAL_TRANSDUCTION	44	0.421357	1.83729	0.0227743	0.0748677	0.52	3779	tags=50%, list=27%, signal=68%
GOBP_CELL_MIGRATION_INVOLVED_IN_SPROUTING_ANGIOGENESIS	GOBP_CELL_MIGRATION_INVOLVED_IN_SPROUTING_ANGIOGENESIS	52	0.44862	1.83519	0.045738	0.0753573	0.522	2441	tags=38%, list=18%, signal=46%
GOBP_AORTA_MORPHOGENESIS	GOBP_AORTA_MORPHOGENESIS	35	0.545382	1.83389	0.0632653	0.0756818	0.522	2205	tags=43%, list=16%, signal=51%
GOBP_T_CELL_LINEAGE_COMMITMENT	GOBP_T_CELL_LINEAGE_COMMITMENT	22	0.487348	1.83469	0.0220441	0.0754402	0.522	413	tags=23%, list=3%, signal=23%
GOBP_POSITIVE_REGULATION_OF_MAST_CELL_ACTIVATION_INVOLVED_IN_IMMUNE_RESPONSE	GOBP_POSITIVE_REGULATION_OF_MAST_CELL_ACTIVATION_INVOLVED_IN_IMMUNE_RESPONSE	16	0.575832	1.83368	0.0392927	0.0756302	0.522	2081	tags=56%, list=15%, signal=66%
GOBP_GLIAL_CELL_DIFFERENTIATION	GOBP_GLIAL_CELL_DIFFERENTIATION	224	0.310526	1.83216	0.0245399	0.0761082	0.522	2002	tags=24%, list=14%, signal=28%
GOBP_NEGATIVE_REGULATION_OF_POTASSIUM_ION_TRANSMEMBRANE_TRANSPORTER_ACTIVITY	GOBP_NEGATIVE_REGULATION_OF_POTASSIUM_ION_TRANSMEMBRANE_TRANSPORTER_ACTIVITY	19	0.496029	1.83138	0.0387597	0.0762824	0.522	3244	tags=53%, list=23%, signal=69%
GOBP_PROTEIN_O_LINKED_GLYCOSYLATION	GOBP_PROTEIN_O_LINKED_GLYCOSYLATION	72	0.359364	1.83026	0.0523139	0.0765336	0.523	5403	tags=58%, list=39%, signal=95%
GOBP_AMINO_SUGAR_METABOLIC_PROCESS	GOBP_AMINO_SUGAR_METABOLIC_PROCESS	37	0.505368	1.83086	0.0360721	0.0763639	0.522	3439	tags=59%, list=25%, signal=79%
GOBP_POSITIVE_REGULATION_OF_NERVOUS_SYSTEM_PROCESS	GOBP_POSITIVE_REGULATION_OF_NERVOUS_SYSTEM_PROCESS	41	0.418543	1.82844	0.0123711	0.0772186	0.523	2905	tags=34%, list=21%, signal=43%
GOBP_DETECTION_OF_OTHER_ORGANISM	GOBP_DETECTION_OF_OTHER_ORGANISM	16	0.839419	1.82821	0.00761905	0.0771999	0.523	1519	tags=75%, list=11%, signal=84%
GOBP_POSITIVE_REGULATION_OF_CYTOSKELETON_ORGANIZATION	GOBP_POSITIVE_REGULATION_OF_CYTOSKELETON_ORGANIZATION	185	0.341633	1.82688	0.0585859	0.0775056	0.523	3790	tags=41%, list=27%, signal=56%
GOBP_STEROID_HORMONE_SECRETION	GOBP_STEROID_HORMONE_SECRETION	22	0.492744	1.82755	0.0121212	0.0773398	0.523	1038	tags=32%, list=7%, signal=34%
GOBP_CELL_CELL_RECOGNITION	GOBP_CELL_CELL_RECOGNITION	39	0.402558	1.82597	0.00204499	0.0777248	0.523	5482	tags=64%, list=39%, signal=105%
GOBP_HUMORAL_IMMUNE_RESPONSE_MEDIATED_BY_CIRCULATING_IMMUNOGLOBULIN	GOBP_HUMORAL_IMMUNE_RESPONSE_MEDIATED_BY_CIRCULATING_IMMUNOGLOBULIN	26	0.641353	1.82571	0.0181087	0.0776879	0.523	1971	tags=58%, list=14%, signal=67%
GOBP_POSITIVE_REGULATION_OF_TRANSMEMBRANE_TRANSPORT	GOBP_POSITIVE_REGULATION_OF_TRANSMEMBRANE_TRANSPORT	213	0.323203	1.82507	0.0480962	0.0778476	0.523	3412	tags=38%, list=24%, signal=50%
GOBP_NEGATIVE_REGULATION_OF_LYMPHOCYTE_DIFFERENTIATION	GOBP_NEGATIVE_REGULATION_OF_LYMPHOCYTE_DIFFERENTIATION	47	0.424691	1.82346	0.0505051	0.0782431	0.525	2379	tags=32%, list=17%, signal=38%
GOBP_RESPONSE_TO_PROTOZOAN	GOBP_RESPONSE_TO_PROTOZOAN	32	0.606929	1.82305	0.0701754	0.0782825	0.525	1877	tags=53%, list=13%, signal=61%
GOBP_REGULATION_OF_G_PROTEIN_COUPLED_RECEPTOR_SIGNALING_PATHWAY	GOBP_REGULATION_OF_G_PROTEIN_COUPLED_RECEPTOR_SIGNALING_PATHWAY	104	0.380312	1.825	0.044898	0.0777634	0.523	2498	tags=34%, list=18%, signal=41%
GOBP_POSITIVE_REGULATION_OF_CELL_DEVELOPMENT	GOBP_POSITIVE_REGULATION_OF_CELL_DEVELOPMENT	454	0.300607	1.82011	0.0876827	0.0791839	0.529	2858	tags=28%, list=21%, signal=35%
GOBP_TRABECULA_MORPHOGENESIS	GOBP_TRABECULA_MORPHOGENESIS	52	0.436075	1.82007	0.0703934	0.0790928	0.529	2795	tags=38%, list=20%, signal=48%
GOBP_POSITIVE_REGULATION_OF_PROTEIN_CONTAINING_COMPLEX_DISASSEMBLY	GOBP_POSITIVE_REGULATION_OF_PROTEIN_CONTAINING_COMPLEX_DISASSEMBLY	32	0.437316	1.82037	0.0224949	0.0792008	0.529	3095	tags=47%, list=22%, signal=60%
GOBP_URETER_DEVELOPMENT	GOBP_URETER_DEVELOPMENT	16	0.651089	1.81986	0.0203252	0.0790458	0.529	1615	tags=50%, list=12%, signal=56%
GOBP_RELEASE_OF_CYTOCHROME_C_FROM_MITOCHONDRIA	GOBP_RELEASE_OF_CYTOCHROME_C_FROM_MITOCHONDRIA	62	0.414059	1.81961	0.0121212	0.0790174	0.529	4893	tags=61%, list=35%, signal=94%
GOBP_MICROGLIA_DIFFERENTIATION	GOBP_MICROGLIA_DIFFERENTIATION	15	0.597004	1.81953	0.0307692	0.0789373	0.529	2780	tags=67%, list=20%, signal=83%
GOBP_MORPHOGENESIS_OF_AN_ENDOTHELIUM	GOBP_MORPHOGENESIS_OF_AN_ENDOTHELIUM	20	0.533644	1.81929	0.0324544	0.0789125	0.529	3829	tags=65%, list=27%, signal=90%
GOBP_CHONDROITIN_SULFATE_PROTEOGLYCAN_METABOLIC_PROCESS	GOBP_CHONDROITIN_SULFATE_PROTEOGLYCAN_METABOLIC_PROCESS	34	0.489973	1.818	0.0658915	0.0791945	0.529	2539	tags=47%, list=18%, signal=57%
GOBP_CELLULAR_RESPONSE_TO_LEPTIN_STIMULUS	GOBP_CELLULAR_RESPONSE_TO_LEPTIN_STIMULUS	16	0.537064	1.81912	0	0.0788532	0.529	1353	tags=38%, list=10%, signal=41%
GOBP_DENDRITIC_CELL_CYTOKINE_PRODUCTION	GOBP_DENDRITIC_CELL_CYTOKINE_PRODUCTION	18	0.569097	1.81796	0.0475248	0.0789869	0.529	2567	tags=56%, list=18%, signal=68%
GOBP_AORTIC_VALVE_DEVELOPMENT	GOBP_AORTIC_VALVE_DEVELOPMENT	31	0.528888	1.81687	0.0292887	0.0792894	0.53	3709	tags=55%, list=27%, signal=75%
GOBP_REGULATION_OF_GRANULOCYTE_DIFFERENTIATION	GOBP_REGULATION_OF_GRANULOCYTE_DIFFERENTIATION	17	0.579578	1.8154	0.0721443	0.0797658	0.53	1469	tags=47%, list=11%, signal=53%
GOBP_RESPONSE_TO_TUMOR_CELL	GOBP_RESPONSE_TO_TUMOR_CELL	31	0.408779	1.81499	0.0295858	0.0798332	0.53	2228	tags=35%, list=16%, signal=42%
GOBP_EMBRYO_IMPLANTATION	GOBP_EMBRYO_IMPLANTATION	50	0.355735	1.81473	0.00410678	0.0798337	0.53	2124	tags=26%, list=15%, signal=31%
GOBP_CELL_PROLIFERATION_INVOLVED_IN_KIDNEY_DEVELOPMENT	GOBP_CELL_PROLIFERATION_INVOLVED_IN_KIDNEY_DEVELOPMENT	18	0.633092	1.81357	0.00639659	0.0801971	0.53	1139	tags=33%, list=8%, signal=36%
GOBP_RESPONSE_TO_AXON_INJURY	GOBP_RESPONSE_TO_AXON_INJURY	67	0.365588	1.81326	0.045738	0.0802177	0.53	2905	tags=36%, list=21%, signal=45%
GOBP_REGULATION_OF_EPITHELIAL_CELL_PROLIFERATION	GOBP_REGULATION_OF_EPITHELIAL_CELL_PROLIFERATION	357	0.325207	1.81291	0.0269151	0.0802271	0.53	3754	tags=37%, list=27%, signal=49%
GOBP_POSITIVE_REGULATION_OF_T_CELL_RECEPTOR_SIGNALING_PATHWAY	GOBP_POSITIVE_REGULATION_OF_T_CELL_RECEPTOR_SIGNALING_PATHWAY	16	0.471803	1.81162	0	0.0806746	0.53	5139	tags=75%, list=37%, signal=119%
GOBP_REGULATION_OF_CYSTEINE_TYPE_ENDOPEPTIDASE_ACTIVITY_INVOLVED_IN_APOPTOTIC_PROCESS	GOBP_REGULATION_OF_CYSTEINE_TYPE_ENDOPEPTIDASE_ACTIVITY_INVOLVED_IN_APOPTOTIC_PROCESS	179	0.330249	1.8105	0.00816326	0.0810398	0.53	4866	tags=50%, list=35%, signal=75%
GOBP_NEGATIVE_REGULATION_OF_SECRETION	GOBP_NEGATIVE_REGULATION_OF_SECRETION	160	0.30368	1.80921	0.0244898	0.0815031	0.53	3278	tags=32%, list=24%, signal=41%
GOBP_GANGLIOSIDE_METABOLIC_PROCESS	GOBP_GANGLIOSIDE_METABOLIC_PROCESS	24	0.542042	1.80882	0.0513834	0.0815486	0.53	2992	tags=58%, list=21%, signal=74%
GOBP_PROTEOGLYCAN_METABOLIC_PROCESS	GOBP_PROTEOGLYCAN_METABOLIC_PROCESS	79	0.386307	1.80807	0.0922131	0.0817196	0.53	2118	tags=33%, list=15%, signal=39%
GOBP_POSITIVE_REGULATION_OF_BLOOD_VESSEL_ENDOTHELIAL_CELL_MIGRATION	GOBP_POSITIVE_REGULATION_OF_BLOOD_VESSEL_ENDOTHELIAL_CELL_MIGRATION	55	0.453726	1.80711	0.0804124	0.0819377	0.53	3412	tags=51%, list=24%, signal=67%
GOBP_MULTICELLULAR_ORGANISMAL_RESPONSE_TO_STRESS	GOBP_MULTICELLULAR_ORGANISMAL_RESPONSE_TO_STRESS	69	0.349451	1.80666	0.0758483	0.0819999	0.532	1998	tags=32%, list=14%, signal=37%
GOBP_REGULATION_OF_NATURAL_KILLER_CELL_DIFFERENTIATION	GOBP_REGULATION_OF_NATURAL_KILLER_CELL_DIFFERENTIATION	16	0.535351	1.80618	0.0339321	0.0820711	0.532	2639	tags=44%, list=19%, signal=54%
GOBP_BLOOD_VESSEL_ENDOTHELIAL_CELL_MIGRATION	GOBP_BLOOD_VESSEL_ENDOTHELIAL_CELL_MIGRATION	115	0.402838	1.80606	0.0555556	0.0819995	0.532	3017	tags=40%, list=22%, signal=51%
GOBP_HYDROGEN_PEROXIDE_BIOSYNTHETIC_PROCESS	GOBP_HYDROGEN_PEROXIDE_BIOSYNTHETIC_PROCESS	16	0.574167	1.80571	0.0139442	0.0820197	0.532	1714	tags=44%, list=12%, signal=50%
GOBP_REGULATION_OF_T_HELPER_1_TYPE_IMMUNE_RESPONSE	GOBP_REGULATION_OF_T_HELPER_1_TYPE_IMMUNE_RESPONSE	24	0.603921	1.80489	0.0199601	0.082228	0.532	3010	tags=63%, list=22%, signal=80%
GOBP_ENDOTHELIAL_CELL_APOPTOTIC_PROCESS	GOBP_ENDOTHELIAL_CELL_APOPTOTIC_PROCESS	42	0.436496	1.80487	0.0740741	0.0821193	0.532	1905	tags=36%, list=14%, signal=41%
GOBP_INFLAMMATORY_RESPONSE_TO_ANTIGENIC_STIMULUS	GOBP_INFLAMMATORY_RESPONSE_TO_ANTIGENIC_STIMULUS	49	0.448932	1.80432	0.0306122	0.0822586	0.532	2795	tags=43%, list=20%, signal=53%
GOBP_NEGATIVE_REGULATION_OF_CELL_MIGRATION_INVOLVED_IN_SPROUTING_ANGIOGENESIS	GOBP_NEGATIVE_REGULATION_OF_CELL_MIGRATION_INVOLVED_IN_SPROUTING_ANGIOGENESIS	16	0.536264	1.80343	0	0.0825304	0.532	2441	tags=44%, list=18%, signal=53%
GOBP_POSITIVE_REGULATION_OF_PHOSPHATASE_ACTIVITY	GOBP_POSITIVE_REGULATION_OF_PHOSPHATASE_ACTIVITY	31	0.433288	1.80317	0.0327198	0.0825394	0.532	1133	tags=26%, list=8%, signal=28%
GOBP_POSITIVE_REGULATION_OF_NUCLEOTIDE_BIOSYNTHETIC_PROCESS	GOBP_POSITIVE_REGULATION_OF_NUCLEOTIDE_BIOSYNTHETIC_PROCESS	18	0.478057	1.80295	0.0180723	0.0825117	0.533	4428	tags=61%, list=32%, signal=89%
GOBP_REGULATION_OF_ACTOMYOSIN_STRUCTURE_ORGANIZATION	GOBP_REGULATION_OF_ACTOMYOSIN_STRUCTURE_ORGANIZATION	104	0.369569	1.80259	0.0630081	0.0825694	0.533	3298	tags=42%, list=24%, signal=55%
GOBP_GLYCOSYLATION	GOBP_GLYCOSYLATION	187	0.348035	1.8023	0.00826446	0.0825744	0.533	5403	tags=59%, list=39%, signal=96%
GOBP_DETECTION_OF_STIMULUS_INVOLVED_IN_SENSORY_PERCEPTION_OF_PAIN	GOBP_DETECTION_OF_STIMULUS_INVOLVED_IN_SENSORY_PERCEPTION_OF_PAIN	22	0.529496	1.80174	0.0289256	0.0826673	0.533	1998	tags=41%, list=14%, signal=48%
GOBP_NEGATIVE_REGULATION_OF_EXOCYTOSIS	GOBP_NEGATIVE_REGULATION_OF_EXOCYTOSIS	32	0.438164	1.80053	0.0361446	0.0830428	0.533	3010	tags=41%, list=22%, signal=52%
GOBP_REACTIVE_OXYGEN_SPECIES_METABOLIC_PROCESS	GOBP_REACTIVE_OXYGEN_SPECIES_METABOLIC_PROCESS	198	0.38233	1.79889	0.0124224	0.0835519	0.533	4893	tags=55%, list=35%, signal=83%
GOBP_REGULATION_OF_TOLL_LIKE_RECEPTOR_4_SIGNALING_PATHWAY	GOBP_REGULATION_OF_TOLL_LIKE_RECEPTOR_4_SIGNALING_PATHWAY	21	0.488504	1.79841	0.0367347	0.0836434	0.533	1236	tags=33%, list=9%, signal=37%
GOBP_HOMEOSTASIS_OF_NUMBER_OF_CELLS	GOBP_HOMEOSTASIS_OF_NUMBER_OF_CELLS	328	0.326484	1.79748	0.0186722	0.0839201	0.533	4797	tags=46%, list=34%, signal=68%
GOBP_ALPHA_BETA_T_CELL_DIFFERENTIATION	GOBP_ALPHA_BETA_T_CELL_DIFFERENTIATION	101	0.387861	1.7972	0.0665323	0.083907	0.533	1172	tags=20%, list=8%, signal=21%
GOBP_KERATINOCYTE_MIGRATION	GOBP_KERATINOCYTE_MIGRATION	19	0.511078	1.79554	0.0588235	0.0844965	0.533	2241	tags=42%, list=16%, signal=50%
GOBP_REGULATION_OF_CD4_POSITIVE_ALPHA_BETA_T_CELL_DIFFERENTIATION	GOBP_REGULATION_OF_CD4_POSITIVE_ALPHA_BETA_T_CELL_DIFFERENTIATION	38	0.488219	1.7948	0.043299	0.0846387	0.533	3010	tags=39%, list=22%, signal=50%
GOBP_EPITHELIAL_CELL_PROLIFERATION	GOBP_EPITHELIAL_CELL_PROLIFERATION	422	0.319723	1.79464	0.0289256	0.08459	0.533	3754	tags=36%, list=27%, signal=48%
GOBP_ICOSANOID_BIOSYNTHETIC_PROCESS	GOBP_ICOSANOID_BIOSYNTHETIC_PROCESS	37	0.409461	1.79428	0.0411523	0.0846192	0.533	687	tags=22%, list=5%, signal=23%
GOBP_REGULATION_OF_CELLULAR_PH	GOBP_REGULATION_OF_CELLULAR_PH	71	0.372118	1.79406	0.0275591	0.084603	0.533	7328	tags=77%, list=53%, signal=163%
GOBP_POSITIVE_REGULATION_OF_FIBROBLAST_MIGRATION	GOBP_POSITIVE_REGULATION_OF_FIBROBLAST_MIGRATION	22	0.5414	1.79405	0.0561331	0.0844982	0.533	2788	tags=55%, list=20%, signal=68%
GOBP_MESENCHYME_MORPHOGENESIS	GOBP_MESENCHYME_MORPHOGENESIS	53	0.417382	1.79329	0.0413223	0.0847348	0.533	2795	tags=36%, list=20%, signal=45%
GOBP_POSITIVE_REGULATION_OF_PEPTIDASE_ACTIVITY	GOBP_POSITIVE_REGULATION_OF_PEPTIDASE_ACTIVITY	163	0.361212	1.7928	0.028866	0.0848183	0.533	5660	tags=60%, list=41%, signal=99%
GOBP_REGULATION_OF_TYPE_2_IMMUNE_RESPONSE	GOBP_REGULATION_OF_TYPE_2_IMMUNE_RESPONSE	26	0.479841	1.79231	0.0384615	0.0849066	0.534	3901	tags=54%, list=28%, signal=75%
GOBP_NUCLEOSIDE_MONOPHOSPHATE_CATABOLIC_PROCESS	GOBP_NUCLEOSIDE_MONOPHOSPHATE_CATABOLIC_PROCESS	18	0.528614	1.79102	0.0140281	0.0853203	0.534	3042	tags=56%, list=22%, signal=71%
GOBP_POSITIVE_REGULATION_OF_ACTIN_CYTOSKELETON_REORGANIZATION	GOBP_POSITIVE_REGULATION_OF_ACTIN_CYTOSKELETON_REORGANIZATION	20	0.495074	1.79085	0.0491803	0.0852855	0.534	2891	tags=50%, list=21%, signal=63%
GOBP_ANTIVIRAL_INNATE_IMMUNE_RESPONSE	GOBP_ANTIVIRAL_INNATE_IMMUNE_RESPONSE	23	0.488508	1.79066	0.00970874	0.0852459	0.536	2446	tags=39%, list=18%, signal=47%
GOBP_RENAL_SYSTEM_PROCESS_INVOLVED_IN_REGULATION_OF_SYSTEMIC_ARTERIAL_BLOOD_PRESSURE	GOBP_RENAL_SYSTEM_PROCESS_INVOLVED_IN_REGULATION_OF_SYSTEMIC_ARTERIAL_BLOOD_PRESSURE	22	0.521669	1.78917	0.0181087	0.0857371	0.536	1234	tags=32%, list=9%, signal=35%
GOBP_REGULATION_OF_EXTRINSIC_APOPTOTIC_SIGNALING_PATHWAY_VIA_DEATH_DOMAIN_RECEPTORS	GOBP_REGULATION_OF_EXTRINSIC_APOPTOTIC_SIGNALING_PATHWAY_VIA_DEATH_DOMAIN_RECEPTORS	44	0.414415	1.78886	0.0309278	0.0857496	0.536	3662	tags=50%, list=26%, signal=68%
GOBP_POSITIVE_REGULATION_OF_MONOATOMIC_ION_TRANSMEMBRANE_TRANSPORT	GOBP_POSITIVE_REGULATION_OF_MONOATOMIC_ION_TRANSMEMBRANE_TRANSPORT	156	0.352952	1.78787	0.05	0.0860468	0.537	3396	tags=41%, list=24%, signal=54%
GOBP_STRIATED_MUSCLE_TISSUE_DEVELOPMENT	GOBP_STRIATED_MUSCLE_TISSUE_DEVELOPMENT	250	0.319458	1.78723	0.0602911	0.0861567	0.537	2868	tags=30%, list=21%, signal=37%
GOBP_HEART_PROCESS	GOBP_HEART_PROCESS	204	0.312374	1.78675	0.055336	0.0862133	0.537	3421	tags=35%, list=25%, signal=46%
GOBP_RESPONSE_TO_NICOTINE	GOBP_RESPONSE_TO_NICOTINE	16	0.460509	1.78562	0.0163934	0.0865986	0.537	1453	tags=31%, list=10%, signal=35%
GOBP_AXON_ENSHEATHMENT_IN_CENTRAL_NERVOUS_SYSTEM	GOBP_AXON_ENSHEATHMENT_IN_CENTRAL_NERVOUS_SYSTEM	23	0.496262	1.78561	0.0184049	0.0864888	0.537	1244	tags=35%, list=9%, signal=38%
GOBP_POSITIVE_REGULATION_OF_ENDOPEPTIDASE_ACTIVITY	GOBP_POSITIVE_REGULATION_OF_ENDOPEPTIDASE_ACTIVITY	151	0.357371	1.78513	0.0246914	0.0865526	0.537	5660	tags=59%, list=41%, signal=98%
GOBP_MESENCHYMAL_CELL_MIGRATION	GOBP_MESENCHYMAL_CELL_MIGRATION	57	0.466023	1.78475	0.0854167	0.0866111	0.538	3466	tags=47%, list=25%, signal=63%
GOBP_POSITIVE_REGULATION_OF_INTERLEUKIN_17_PRODUCTION	GOBP_POSITIVE_REGULATION_OF_INTERLEUKIN_17_PRODUCTION	20	0.471745	1.78413	0.0318725	0.0867837	0.538	2698	tags=45%, list=19%, signal=56%
GOBP_POSITIVE_REGULATION_OF_MYOBLAST_PROLIFERATION	GOBP_POSITIVE_REGULATION_OF_MYOBLAST_PROLIFERATION	16	0.533732	1.7838	0.0251046	0.0868041	0.538	1366	tags=31%, list=10%, signal=35%
GOBP_POSITIVE_T_CELL_SELECTION	GOBP_POSITIVE_T_CELL_SELECTION	32	0.412122	1.78243	0.028	0.0872321	0.541	2379	tags=31%, list=17%, signal=38%
GOBP_MEMORY	GOBP_MEMORY	121	0.353004	1.78189	0.0512295	0.0873162	0.541	2684	tags=34%, list=19%, signal=42%
GOBP_NEGATIVE_REGULATION_OF_RESPONSE_TO_REACTIVE_OXYGEN_SPECIES	GOBP_NEGATIVE_REGULATION_OF_RESPONSE_TO_REACTIVE_OXYGEN_SPECIES	21	0.482729	1.7813	0.0138889	0.0874354	0.541	3048	tags=52%, list=22%, signal=67%
GOBP_NITRIC_OXIDE_MEDIATED_SIGNAL_TRANSDUCTION	GOBP_NITRIC_OXIDE_MEDIATED_SIGNAL_TRANSDUCTION	21	0.522695	1.78117	0.0666667	0.0873767	0.541	3335	tags=52%, list=24%, signal=69%
GOBP_NIK_NF_KAPPAB_SIGNALING	GOBP_NIK_NF_KAPPAB_SIGNALING	112	0.332143	1.78071	0.0203252	0.087464	0.541	5234	tags=51%, list=38%, signal=81%
GOBP_AMINE_TRANSPORT	GOBP_AMINE_TRANSPORT	81	0.411492	1.78023	0.0306748	0.087589	0.541	3209	tags=43%, list=23%, signal=56%
GOBP_ENDOTHELIAL_CELL_DEVELOPMENT	GOBP_ENDOTHELIAL_CELL_DEVELOPMENT	64	0.425313	1.77999	0.0724638	0.0875902	0.541	2599	tags=39%, list=19%, signal=48%
GOBP_RESPONSE_TO_PH	GOBP_RESPONSE_TO_PH	31	0.456894	1.77977	0.047817	0.0875607	0.541	3650	tags=45%, list=26%, signal=61%
GOBP_REGULATION_OF_LIPOPROTEIN_PARTICLE_CLEARANCE	GOBP_REGULATION_OF_LIPOPROTEIN_PARTICLE_CLEARANCE	17	0.402409	1.77928	0.00798403	0.087681	0.541	5652	tags=59%, list=41%, signal=99%
GOBP_CHONDROITIN_SULFATE_METABOLIC_PROCESS	GOBP_CHONDROITIN_SULFATE_METABOLIC_PROCESS	28	0.535741	1.77916	0.0859375	0.0875971	0.541	2539	tags=50%, list=18%, signal=61%
GOBP_REPRODUCTIVE_BEHAVIOR	GOBP_REPRODUCTIVE_BEHAVIOR	39	0.39578	1.77896	0.0123711	0.0875735	0.541	2789	tags=31%, list=20%, signal=38%
GOBP_LYMPHOCYTE_COSTIMULATION	GOBP_LYMPHOCYTE_COSTIMULATION	26	0.529977	1.77886	0.0400802	0.0874858	0.541	3541	tags=58%, list=25%, signal=77%
GOBP_T_CELL_APOPTOTIC_PROCESS	GOBP_T_CELL_APOPTOTIC_PROCESS	60	0.392173	1.77884	0.0275424	0.0873823	0.541	4754	tags=50%, list=34%, signal=76%
GOBP_MESENCHYME_DEVELOPMENT	GOBP_MESENCHYME_DEVELOPMENT	259	0.328466	1.77819	0.114823	0.0875853	0.541	3529	tags=34%, list=25%, signal=45%
GOBP_STRESS_FIBER_ASSEMBLY	GOBP_STRESS_FIBER_ASSEMBLY	109	0.375447	1.7781	0.0693878	0.0874978	0.541	3298	tags=43%, list=24%, signal=56%
GOBP_REGULATION_OF_MUSCLE_CONTRACTION	GOBP_REGULATION_OF_MUSCLE_CONTRACTION	138	0.356817	1.77765	0.056338	0.0875433	0.541	4433	tags=48%, list=32%, signal=69%
GOBP_NUCLEOBASE_CONTAINING_SMALL_MOLECULE_CATABOLIC_PROCESS	GOBP_NUCLEOBASE_CONTAINING_SMALL_MOLECULE_CATABOLIC_PROCESS	20	0.546004	1.77727	0.00199203	0.0876259	0.541	2926	tags=55%, list=21%, signal=70%
GOBP_POSITIVE_REGULATION_OF_NATURAL_KILLER_CELL_MEDIATED_IMMUNITY	GOBP_POSITIVE_REGULATION_OF_NATURAL_KILLER_CELL_MEDIATED_IMMUNITY	19	0.577921	1.77698	0.021611	0.087627	0.541	1893	tags=47%, list=14%, signal=55%
GOBP_CATECHOLAMINE_SECRETION	GOBP_CATECHOLAMINE_SECRETION	46	0.457262	1.7768	0.018	0.0876194	0.541	3209	tags=46%, list=23%, signal=59%
GOBP_NEGATIVE_REGULATION_OF_CALCIUM_ION_TRANSMEMBRANE_TRANSPORTER_ACTIVITY	GOBP_NEGATIVE_REGULATION_OF_CALCIUM_ION_TRANSMEMBRANE_TRANSPORTER_ACTIVITY	30	0.451302	1.77437	0.0297619	0.0886508	0.542	2892	tags=50%, list=21%, signal=63%
GOBP_ADENYLATE_CYCLASE_MODULATING_G_PROTEIN_COUPLED_RECEPTOR_SIGNALING_PATHWAY	GOBP_ADENYLATE_CYCLASE_MODULATING_G_PROTEIN_COUPLED_RECEPTOR_SIGNALING_PATHWAY	136	0.411464	1.77404	0.0436508	0.0886888	0.542	2677	tags=36%, list=19%, signal=44%
GOBP_ANDROGEN_METABOLIC_PROCESS	GOBP_ANDROGEN_METABOLIC_PROCESS	20	0.467007	1.77364	0.00986193	0.0887365	0.542	1845	tags=30%, list=13%, signal=35%
GOBP_REGULATION_OF_BLOOD_CIRCULATION	GOBP_REGULATION_OF_BLOOD_CIRCULATION	209	0.339561	1.77353	0.0414201	0.0886801	0.542	2117	tags=27%, list=15%, signal=31%
GOBP_MAINTENANCE_OF_LOCATION	GOBP_MAINTENANCE_OF_LOCATION	297	0.31579	1.77302	0.0244399	0.0887886	0.542	3883	tags=40%, list=28%, signal=54%
GOBP_CATECHOL_CONTAINING_COMPOUND_BIOSYNTHETIC_PROCESS	GOBP_CATECHOL_CONTAINING_COMPOUND_BIOSYNTHETIC_PROCESS	18	0.517984	1.77276	0.0201207	0.0887674	0.542	1621	tags=39%, list=12%, signal=44%
GOBP_REGULATION_OF_NEUROTRANSMITTER_TRANSPORT	GOBP_REGULATION_OF_NEUROTRANSMITTER_TRANSPORT	84	0.290294	1.77262	0.027668	0.088698	0.542	3389	tags=35%, list=24%, signal=45%
GOBP_POSITIVE_REGULATION_OF_NIK_NF_KAPPAB_SIGNALING	GOBP_POSITIVE_REGULATION_OF_NIK_NF_KAPPAB_SIGNALING	64	0.343175	1.77243	0.0207039	0.0886717	0.542	3709	tags=39%, list=27%, signal=53%
GOBP_POSITIVE_REGULATION_OF_MUSCLE_CONTRACTION	GOBP_POSITIVE_REGULATION_OF_MUSCLE_CONTRACTION	41	0.407063	1.77195	0.030426	0.0887307	0.542	3897	tags=46%, list=28%, signal=64%
GOBP_SMOOTH_MUSCLE_CONTRACTION	GOBP_SMOOTH_MUSCLE_CONTRACTION	95	0.390191	1.77173	0.0912621	0.0887029	0.542	2081	tags=32%, list=15%, signal=37%
GOBP_RESPONSE_TO_ESTRADIOL	GOBP_RESPONSE_TO_ESTRADIOL	38	0.36236	1.77137	0.0268595	0.0887365	0.542	1988	tags=29%, list=14%, signal=34%
GOBP_COMPLEMENT_ACTIVATION	GOBP_COMPLEMENT_ACTIVATION	33	0.582443	1.77119	0.0410959	0.0886832	0.542	1666	tags=55%, list=12%, signal=62%
GOBP_NEGATIVE_REGULATION_OF_INTERLEUKIN_1_BETA_PRODUCTION	GOBP_NEGATIVE_REGULATION_OF_INTERLEUKIN_1_BETA_PRODUCTION	22	0.560808	1.7688	0.0284553	0.0895998	0.544	3761	tags=64%, list=27%, signal=87%
GOBP_REGULATION_OF_PLATELET_AGGREGATION	GOBP_REGULATION_OF_PLATELET_AGGREGATION	25	0.529356	1.76822	0.0819672	0.0897369	0.544	2698	tags=48%, list=19%, signal=59%
GOBP_ALPHA_BETA_T_CELL_PROLIFERATION	GOBP_ALPHA_BETA_T_CELL_PROLIFERATION	46	0.431957	1.76795	0.0364372	0.089736	0.544	3494	tags=50%, list=25%, signal=67%
GOBP_NEGATIVE_REGULATION_OF_BLOOD_VESSEL_ENDOTHELIAL_CELL_MIGRATION	GOBP_NEGATIVE_REGULATION_OF_BLOOD_VESSEL_ENDOTHELIAL_CELL_MIGRATION	32	0.452994	1.76638	0.0083682	0.0903187	0.544	3017	tags=44%, list=22%, signal=56%
GOBP_DENDRITIC_CELL_MIGRATION	GOBP_DENDRITIC_CELL_MIGRATION	22	0.472485	1.76628	0.0479042	0.0902487	0.544	800	tags=32%, list=6%, signal=34%
GOBP_CELL_CELL_ADHESION_MEDIATED_BY_INTEGRIN	GOBP_CELL_CELL_ADHESION_MEDIATED_BY_INTEGRIN	17	0.594024	1.76543	0.0311284	0.0905297	0.545	2241	tags=59%, list=16%, signal=70%
GOBP_REGULATION_OF_MEMBRANE_DEPOLARIZATION	GOBP_REGULATION_OF_MEMBRANE_DEPOLARIZATION	42	0.372431	1.76526	0.0673267	0.0905259	0.545	4164	tags=50%, list=30%, signal=71%
GOBP_NEGATIVE_REGULATION_OF_MICROTUBULE_POLYMERIZATION	GOBP_NEGATIVE_REGULATION_OF_MICROTUBULE_POLYMERIZATION	15	0.45167	1.76499	0.0346939	0.0905458	0.545	3683	tags=53%, list=26%, signal=72%
GOBP_NEGATIVE_REGULATION_OF_SMOOTH_MUSCLE_CELL_PROLIFERATION	GOBP_NEGATIVE_REGULATION_OF_SMOOTH_MUSCLE_CELL_PROLIFERATION	62	0.37009	1.76461	0.027668	0.0905835	0.545	3850	tags=47%, list=28%, signal=64%
GOBP_NEGATIVE_REGULATION_OF_CELL_KILLING	GOBP_NEGATIVE_REGULATION_OF_CELL_KILLING	23	0.518484	1.76399	0.043222	0.0907735	0.545	2639	tags=57%, list=19%, signal=70%
GOBP_REGULATION_OF_CELL_SHAPE	GOBP_REGULATION_OF_CELL_SHAPE	133	0.362987	1.76341	0.10883	0.0908844	0.545	4416	tags=47%, list=32%, signal=68%
GOBP_GAP_JUNCTION_ASSEMBLY	GOBP_GAP_JUNCTION_ASSEMBLY	15	0.54095	1.76306	0.0626263	0.0909085	0.545	3086	tags=60%, list=22%, signal=77%
GOBP_ACTIN_FILAMENT_ORGANIZATION	GOBP_ACTIN_FILAMENT_ORGANIZATION	397	0.338004	1.76274	0.0925926	0.0909178	0.545	4447	tags=46%, list=32%, signal=66%
GOBP_REGULATION_OF_SUPRAMOLECULAR_FIBER_ORGANIZATION	GOBP_REGULATION_OF_SUPRAMOLECULAR_FIBER_ORGANIZATION	358	0.328077	1.76226	0.0473251	0.0909939	0.545	4447	tags=46%, list=32%, signal=66%
GOBP_REGULATION_OF_ACTIN_FILAMENT_BUNDLE_ASSEMBLY	GOBP_REGULATION_OF_ACTIN_FILAMENT_BUNDLE_ASSEMBLY	107	0.362317	1.76009	0.0873984	0.0919071	0.548	3298	tags=42%, list=24%, signal=55%
GOBP_GLYCOPROTEIN_CATABOLIC_PROCESS	GOBP_GLYCOPROTEIN_CATABOLIC_PROCESS	29	0.487242	1.75906	0.0671937	0.0923138	0.55	4703	tags=72%, list=34%, signal=109%
GOBP_CELL_FATE_DETERMINATION	GOBP_CELL_FATE_DETERMINATION	26	0.516515	1.75828	0.0211416	0.092559	0.55	1812	tags=35%, list=13%, signal=40%
GOBP_MESENCHYMAL_CELL_DIFFERENTIATION	GOBP_MESENCHYMAL_CELL_DIFFERENTIATION	218	0.328584	1.75671	0.110879	0.0930989	0.553	3529	tags=35%, list=25%, signal=47%
GOBP_POSITIVE_REGULATION_OF_PROTEIN_KINASE_ACTIVITY	GOBP_POSITIVE_REGULATION_OF_PROTEIN_KINASE_ACTIVITY	313	0.306404	1.75628	0.0673469	0.093184	0.553	3805	tags=36%, list=27%, signal=49%
GOBP_SEMI_LUNAR_VALVE_DEVELOPMENT	GOBP_SEMI_LUNAR_VALVE_DEVELOPMENT	37	0.489748	1.75522	0.0822785	0.0934943	0.553	3709	tags=51%, list=27%, signal=70%
GOBP_ORGANIC_HYDROXY_COMPOUND_TRANSPORT	GOBP_ORGANIC_HYDROXY_COMPOUND_TRANSPORT	199	0.321231	1.75359	0.0229167	0.094192	0.553	3209	tags=34%, list=23%, signal=44%
GOBP_MUCOPOLYSACCHARIDE_METABOLIC_PROCESS	GOBP_MUCOPOLYSACCHARIDE_METABOLIC_PROCESS	72	0.400258	1.7534	0.114228	0.0942051	0.556	3482	tags=44%, list=25%, signal=59%
GOBP_REGULATION_OF_ACTIN_FILAMENT_ORGANIZATION	GOBP_REGULATION_OF_ACTIN_FILAMENT_ORGANIZATION	253	0.344476	1.75289	0.0578512	0.0942929	0.557	4447	tags=48%, list=32%, signal=70%
GOBP_NEGATIVE_REGULATION_OF_NERVOUS_SYSTEM_PROCESS	GOBP_NEGATIVE_REGULATION_OF_NERVOUS_SYSTEM_PROCESS	17	0.513971	1.75212	0.0282258	0.0945144	0.558	2453	tags=47%, list=18%, signal=57%
GOBP_NEGATIVE_REGULATION_OF_POTASSIUM_ION_TRANSPORT	GOBP_NEGATIVE_REGULATION_OF_POTASSIUM_ION_TRANSPORT	29	0.418401	1.7521	0.0518962	0.0944016	0.558	1281	tags=28%, list=9%, signal=30%
GOBP_RESPIRATORY_GASEOUS_EXCHANGE_BY_RESPIRATORY_SYSTEM	GOBP_RESPIRATORY_GASEOUS_EXCHANGE_BY_RESPIRATORY_SYSTEM	47	0.374868	1.752	0.0268041	0.0943164	0.558	2105	tags=30%, list=15%, signal=35%
GOBP_POSITIVE_REGULATION_OF_VASOCONSTRICTION	GOBP_POSITIVE_REGULATION_OF_VASOCONSTRICTION	41	0.402458	1.75165	0.0529412	0.0943512	0.558	5321	tags=56%, list=38%, signal=90%
GOBP_NEGATIVE_REGULATION_OF_TYPE_I_INTERFERON_MEDIATED_SIGNALING_PATHWAY	GOBP_NEGATIVE_REGULATION_OF_TYPE_I_INTERFERON_MEDIATED_SIGNALING_PATHWAY	21	0.461567	1.75142	0.0346939	0.0943446	0.558	2176	tags=33%, list=16%, signal=39%
GOBP_COGNITION	GOBP_COGNITION	266	0.292734	1.75087	0.0613497	0.0944513	0.558	3571	tags=36%, list=26%, signal=47%
GOBP_REGULATION_OF_NMDA_RECEPTOR_ACTIVITY	GOBP_REGULATION_OF_NMDA_RECEPTOR_ACTIVITY	19	0.465485	1.75065	0.0334728	0.0944428	0.558	3119	tags=58%, list=22%, signal=74%
GOBP_NEGATIVE_REGULATION_OF_NIK_NF_KAPPAB_SIGNALING	GOBP_NEGATIVE_REGULATION_OF_NIK_NF_KAPPAB_SIGNALING	25	0.435343	1.74944	0.0337972	0.094887	0.558	5139	tags=68%, list=37%, signal=108%
GOBP_MUSCLE_SYSTEM_PROCESS	GOBP_MUSCLE_SYSTEM_PROCESS	371	0.308132	1.74804	0.0818363	0.0954931	0.562	3530	tags=36%, list=25%, signal=47%
GOBP_CARDIAC_CHAMBER_MORPHOGENESIS	GOBP_CARDIAC_CHAMBER_MORPHOGENESIS	117	0.349768	1.74753	0.0941423	0.0956033	0.562	3642	tags=36%, list=26%, signal=48%
GOBP_POSITIVE_REGULATION_OF_APOPTOTIC_SIGNALING_PATHWAY	GOBP_POSITIVE_REGULATION_OF_APOPTOTIC_SIGNALING_PATHWAY	150	0.353493	1.74745	0.026971	0.09552	0.562	5419	tags=57%, list=39%, signal=92%
GOBP_MUSCLE_CONTRACTION	GOBP_MUSCLE_CONTRACTION	264	0.331251	1.7464	0.0813492	0.0958576	0.566	4477	tags=47%, list=32%, signal=68%
GOBP_RELEASE_OF_SEQUESTERED_CALCIUM_ION_INTO_CYTOSOL_BY_ENDOPLASMIC_RETICULUM	GOBP_RELEASE_OF_SEQUESTERED_CALCIUM_ION_INTO_CYTOSOL_BY_ENDOPLASMIC_RETICULUM	24	0.495652	1.7456	0.0443548	0.0961414	0.566	4403	tags=63%, list=32%, signal=91%
GOBP_POSITIVE_REGULATION_OF_CYSTEINE_TYPE_ENDOPEPTIDASE_ACTIVITY_INVOLVED_IN_APOPTOTIC_PROCESS	GOBP_POSITIVE_REGULATION_OF_CYSTEINE_TYPE_ENDOPEPTIDASE_ACTIVITY_INVOLVED_IN_APOPTOTIC_PROCESS	111	0.354631	1.74306	0.00821355	0.097247	0.571	3973	tags=44%, list=29%, signal=61%
GOBP_DETECTION_OF_MECHANICAL_STIMULUS_INVOLVED_IN_SENSORY_PERCEPTION_OF_PAIN	GOBP_DETECTION_OF_MECHANICAL_STIMULUS_INVOLVED_IN_SENSORY_PERCEPTION_OF_PAIN	15	0.573779	1.74296	0.0364372	0.097163	0.571	1998	tags=47%, list=14%, signal=54%
GOBP_REGULATION_OF_SYSTEMIC_ARTERIAL_BLOOD_PRESSURE_BY_CIRCULATORY_RENIN_ANGIOTENSIN	GOBP_REGULATION_OF_SYSTEMIC_ARTERIAL_BLOOD_PRESSURE_BY_CIRCULATORY_RENIN_ANGIOTENSIN	15	0.658326	1.74211	0.0211132	0.0974326	0.571	1030	tags=47%, list=7%, signal=50%
GOBP_NEGATIVE_REGULATION_OF_AXON_EXTENSION	GOBP_NEGATIVE_REGULATION_OF_AXON_EXTENSION	48	0.445158	1.74188	0.039501	0.0974483	0.571	2139	tags=33%, list=15%, signal=39%
GOBP_POSITIVE_REGULATION_OF_CALCIUM_ION_TRANSMEMBRANE_TRANSPORT	GOBP_POSITIVE_REGULATION_OF_CALCIUM_ION_TRANSMEMBRANE_TRANSPORT	82	0.370607	1.74074	0.0577689	0.0978897	0.571	3396	tags=44%, list=24%, signal=58%
GOBP_REGULATION_OF_EXCRETION	GOBP_REGULATION_OF_EXCRETION	21	0.506772	1.74037	0.0252918	0.0979351	0.571	2200	tags=43%, list=16%, signal=51%
GOBP_REGULATION_OF_RELEASE_OF_CYTOCHROME_C_FROM_MITOCHONDRIA	GOBP_REGULATION_OF_RELEASE_OF_CYTOCHROME_C_FROM_MITOCHONDRIA	48	0.419171	1.73972	0.0204082	0.0981098	0.571	6408	tags=77%, list=46%, signal=142%
GOBP_ACUTE_PHASE_RESPONSE	GOBP_ACUTE_PHASE_RESPONSE	26	0.60961	1.7387	0.0216535	0.0985232	0.571	1773	tags=50%, list=13%, signal=57%
GOBP_POSITIVE_REGULATION_OF_KINASE_ACTIVITY	GOBP_POSITIVE_REGULATION_OF_KINASE_ACTIVITY	367	0.306228	1.73772	0.0737705	0.0988335	0.571	3805	tags=36%, list=27%, signal=49%
GOBP_PHAGOSOME_MATURATION	GOBP_PHAGOSOME_MATURATION	28	0.426309	1.7373	0.0697211	0.0988764	0.571	1833	tags=36%, list=13%, signal=41%
GOBP_POSITIVE_REGULATION_OF_G_PROTEIN_COUPLED_RECEPTOR_SIGNALING_PATHWAY	GOBP_POSITIVE_REGULATION_OF_G_PROTEIN_COUPLED_RECEPTOR_SIGNALING_PATHWAY	23	0.459719	1.7371	0.0387755	0.098826	0.571	2472	tags=39%, list=18%, signal=47%
GOBP_RESPONSE_TO_PAIN	GOBP_RESPONSE_TO_PAIN	29	0.498209	1.73634	0.0424242	0.0989641	0.572	2478	tags=52%, list=18%, signal=63%
GOBP_POSITIVE_REGULATION_OF_PROTEIN_MATURATION	GOBP_POSITIVE_REGULATION_OF_PROTEIN_MATURATION	24	0.410294	1.73529	0.0125786	0.0993684	0.574	4684	tags=54%, list=34%, signal=81%
GOBP_POSITIVE_REGULATION_OF_SIGNALING_RECEPTOR_ACTIVITY	GOBP_POSITIVE_REGULATION_OF_SIGNALING_RECEPTOR_ACTIVITY	38	0.374805	1.73463	0.0393375	0.0995025	0.574	3119	tags=42%, list=22%, signal=54%
GOBP_SEQUESTERING_OF_METAL_ION	GOBP_SEQUESTERING_OF_METAL_ION	16	0.494502	1.73323	0.0254902	0.100035	0.574	3010	tags=56%, list=22%, signal=72%
GOBP_REGULATION_OF_PROTEIN_TYROSINE_KINASE_ACTIVITY	GOBP_REGULATION_OF_PROTEIN_TYROSINE_KINASE_ACTIVITY	73	0.345224	1.73245	0.0309278	0.10025	0.575	3086	tags=34%, list=22%, signal=44%
GOBP_REGULATION_OF_PHOSPHOLIPASE_C_ACTIVITY	GOBP_REGULATION_OF_PHOSPHOLIPASE_C_ACTIVITY	24	0.482826	1.73202	0.0695296	0.10032	0.577	2130	tags=38%, list=15%, signal=44%
GOBP_REGULATION_OF_NATURAL_KILLER_CELL_ACTIVATION	GOBP_REGULATION_OF_NATURAL_KILLER_CELL_ACTIVATION	42	0.416819	1.73145	0.06	0.100491	0.577	2189	tags=33%, list=16%, signal=39%
GOBP_NEGATIVE_REGULATION_OF_NEURON_PROJECTION_DEVELOPMENT	GOBP_NEGATIVE_REGULATION_OF_NEURON_PROJECTION_DEVELOPMENT	148	0.318667	1.73135	0.0647182	0.100434	0.577	2139	tags=27%, list=15%, signal=32%
GOBP_NEGATIVE_REGULATION_OF_TOLL_LIKE_RECEPTOR_SIGNALING_PATHWAY	GOBP_NEGATIVE_REGULATION_OF_TOLL_LIKE_RECEPTOR_SIGNALING_PATHWAY	18	0.443099	1.73134	0.055666	0.100317	0.577	927	tags=28%, list=7%, signal=30%
GOBP_POSITIVE_REGULATION_OF_CYTOSOLIC_CALCIUM_ION_CONCENTRATION_INVOLVED_IN_PHOSPHOLIPASE_C_ACTIVATING_G_PROTEIN_COUPLED_SIGNALING_PATHWAY	GOBP_POSITIVE_REGULATION_OF_CYTOSOLIC_CALCIUM_ION_CONCENTRATION_INVOLVED_IN_PHOSPHOLIPASE_C_ACTIVATING_G_PROTEIN_COUPLED_SIGNALING_PATHWAY	23	0.574424	1.73021	0.0667976	0.100707	0.577	3396	tags=61%, list=24%, signal=80%
GOBP_VIRAL_LIFE_CYCLE	GOBP_VIRAL_LIFE_CYCLE	216	0.330683	1.72995	0.0223124	0.100727	0.577	2631	tags=29%, list=19%, signal=35%
GOBP_POSITIVE_REGULATION_OF_T_CELL_MEDIATED_IMMUNITY	GOBP_POSITIVE_REGULATION_OF_T_CELL_MEDIATED_IMMUNITY	54	0.341166	1.7276	0.0340681	0.101657	0.577	1931	tags=28%, list=14%, signal=32%
GOBP_SIGNAL_RELEASE	GOBP_SIGNAL_RELEASE	431	0.262268	1.72728	0.0608519	0.10169	0.579	3427	tags=30%, list=25%, signal=38%
GOBP_GLYCOSYLCERAMIDE_METABOLIC_PROCESS	GOBP_GLYCOSYLCERAMIDE_METABOLIC_PROCESS	15	0.515086	1.72687	0.0180361	0.101784	0.579	2992	tags=53%, list=21%, signal=68%
GOBP_RESPONSE_TO_LEPTIN	GOBP_RESPONSE_TO_LEPTIN	18	0.498857	1.72579	0.00205761	0.102204	0.582	1353	tags=33%, list=10%, signal=37%
GOBP_NOREPINEPHRINE_SECRETION	GOBP_NOREPINEPHRINE_SECRETION	15	0.542618	1.72565	0.0119048	0.102151	0.582	2081	tags=40%, list=15%, signal=47%
GOBP_POSITIVE_REGULATION_OF_DNA_BINDING_TRANSCRIPTION_FACTOR_ACTIVITY	GOBP_POSITIVE_REGULATION_OF_DNA_BINDING_TRANSCRIPTION_FACTOR_ACTIVITY	226	0.301085	1.72534	0.0549898	0.102169	0.583	3773	tags=37%, list=27%, signal=50%
GOBP_NUCLEOTIDE_SUGAR_BIOSYNTHETIC_PROCESS	GOBP_NUCLEOTIDE_SUGAR_BIOSYNTHETIC_PROCESS	16	0.550304	1.72508	0.00782779	0.102191	0.583	4273	tags=81%, list=31%, signal=117%
GOBP_ACTIN_FILAMENT_BUNDLE_ORGANIZATION	GOBP_ACTIN_FILAMENT_BUNDLE_ORGANIZATION	161	0.35289	1.72359	0.107216	0.102785	0.586	3298	tags=40%, list=24%, signal=52%
GOBP_REGULATION_OF_MUSCLE_SYSTEM_PROCESS	GOBP_REGULATION_OF_MUSCLE_SYSTEM_PROCESS	223	0.309279	1.72323	0.08	0.102858	0.587	4949	tags=47%, list=36%, signal=71%
GOBP_ENDOTHELIAL_CELL_CHEMOTAXIS	GOBP_ENDOTHELIAL_CELL_CHEMOTAXIS	27	0.477326	1.72213	0.0481172	0.103273	0.587	2806	tags=44%, list=20%, signal=56%
GOBP_REGULATION_OF_CALCIUM_ION_TRANSPORT_INTO_CYTOSOL	GOBP_REGULATION_OF_CALCIUM_ION_TRANSPORT_INTO_CYTOSOL	15	0.484218	1.72199	0.040856	0.103241	0.588	3790	tags=60%, list=27%, signal=82%
GOBP_REGULATION_OF_OXIDOREDUCTASE_ACTIVITY	GOBP_REGULATION_OF_OXIDOREDUCTASE_ACTIVITY	86	0.317277	1.72085	0.0386965	0.103615	0.589	3623	tags=37%, list=26%, signal=50%
GOBP_RECEPTOR_INTERNALIZATION	GOBP_RECEPTOR_INTERNALIZATION	120	0.351986	1.72082	0.0497925	0.103509	0.589	3155	tags=38%, list=23%, signal=49%
GOBP_RENAL_FILTRATION	GOBP_RENAL_FILTRATION	25	0.455945	1.71928	0.0875	0.104187	0.593	3778	tags=48%, list=27%, signal=66%
GOBP_CELLULAR_RESPONSE_TO_LIPID	GOBP_CELLULAR_RESPONSE_TO_LIPID	418	0.29192	1.71924	0.0368852	0.104096	0.593	2024	tags=22%, list=15%, signal=25%
GOBP_CD8_POSITIVE_ALPHA_BETA_T_CELL_DIFFERENTIATION	GOBP_CD8_POSITIVE_ALPHA_BETA_T_CELL_DIFFERENTIATION	15	0.557372	1.71922	0.0346232	0.10398	0.593	1801	tags=33%, list=13%, signal=38%
GOBP_ANGIOGENESIS_INVOLVED_IN_WOUND_HEALING	GOBP_ANGIOGENESIS_INVOLVED_IN_WOUND_HEALING	24	0.461702	1.71822	0.0554415	0.104324	0.593	2410	tags=38%, list=17%, signal=45%
GOBP_POSITIVE_REGULATION_OF_NITRIC_OXIDE_SYNTHASE_BIOSYNTHETIC_PROCESS	GOBP_POSITIVE_REGULATION_OF_NITRIC_OXIDE_SYNTHASE_BIOSYNTHETIC_PROCESS	19	0.495143	1.71703	0.0518672	0.104793	0.593	2341	tags=42%, list=17%, signal=51%
GOBP_COMPLEMENT_ACTIVATION_CLASSICAL_PATHWAY	GOBP_COMPLEMENT_ACTIVATION_CLASSICAL_PATHWAY	17	0.643111	1.71617	0.0258964	0.10502	0.593	1666	tags=59%, list=12%, signal=67%
GOBP_RESPONSE_TO_TYPE_I_INTERFERON	GOBP_RESPONSE_TO_TYPE_I_INTERFERON	55	0.381839	1.71605	0.0511247	0.104958	0.596	2506	tags=33%, list=18%, signal=40%
GOBP_REGULATION_OF_HORMONE_LEVELS	GOBP_REGULATION_OF_HORMONE_LEVELS	422	0.277111	1.71471	0.0243902	0.105483	0.596	2802	tags=27%, list=20%, signal=32%
GOBP_POSITIVE_REGULATION_OF_EXTRINSIC_APOPTOTIC_SIGNALING_PATHWAY_VIA_DEATH_DOMAIN_RECEPTORS	GOBP_POSITIVE_REGULATION_OF_EXTRINSIC_APOPTOTIC_SIGNALING_PATHWAY_VIA_DEATH_DOMAIN_RECEPTORS	15	0.540652	1.71458	0.0208333	0.105417	0.596	3662	tags=67%, list=26%, signal=90%
GOBP_REGULATION_OF_PROTEIN_MATURATION	GOBP_REGULATION_OF_PROTEIN_MATURATION	61	0.369702	1.71409	0.0539419	0.105547	0.596	5063	tags=54%, list=36%, signal=85%
GOBP_EXTRINSIC_APOPTOTIC_SIGNALING_PATHWAY_VIA_DEATH_DOMAIN_RECEPTORS	GOBP_EXTRINSIC_APOPTOTIC_SIGNALING_PATHWAY_VIA_DEATH_DOMAIN_RECEPTORS	74	0.351399	1.71389	0.0530612	0.105507	0.596	6092	tags=64%, list=44%, signal=112%
GOBP_CELLULAR_RESPONSE_TO_OSMOTIC_STRESS	GOBP_CELLULAR_RESPONSE_TO_OSMOTIC_STRESS	46	0.363517	1.71299	0.041502	0.105829	0.596	3318	tags=41%, list=24%, signal=54%
GOBP_NEGATIVE_REGULATION_OF_AMINE_TRANSPORT	GOBP_NEGATIVE_REGULATION_OF_AMINE_TRANSPORT	26	0.545332	1.71283	0.0244399	0.105815	0.596	2863	tags=46%, list=21%, signal=58%
GOBP_SENSORY_PERCEPTION	GOBP_SENSORY_PERCEPTION	315	0.310891	1.71047	0.0258964	0.106811	0.598	2038	tags=24%, list=15%, signal=28%
GOBP_REGULATION_OF_TOLL_LIKE_RECEPTOR_SIGNALING_PATHWAY	GOBP_REGULATION_OF_TOLL_LIKE_RECEPTOR_SIGNALING_PATHWAY	28	0.415531	1.70905	0.0758755	0.107315	0.598	3013	tags=43%, list=22%, signal=55%
GOBP_TROPHOBLAST_CELL_MIGRATION	GOBP_TROPHOBLAST_CELL_MIGRATION	15	0.463931	1.70792	0	0.10777	0.6	2124	tags=33%, list=15%, signal=39%
GOBP_SENSORY_PERCEPTION_OF_TEMPERATURE_STIMULUS	GOBP_SENSORY_PERCEPTION_OF_TEMPERATURE_STIMULUS	17	0.478705	1.70756	0.0207469	0.107804	0.6	1461	tags=29%, list=10%, signal=33%
GOBP_ESTABLISHMENT_OF_ENDOTHELIAL_BARRIER	GOBP_ESTABLISHMENT_OF_ENDOTHELIAL_BARRIER	48	0.425983	1.70741	0.0922131	0.107761	0.6	1976	tags=35%, list=14%, signal=41%
GOBP_REGULATION_OF_CATION_CHANNEL_ACTIVITY	GOBP_REGULATION_OF_CATION_CHANNEL_ACTIVITY	112	0.327923	1.70732	0.0504032	0.107702	0.6	3396	tags=38%, list=24%, signal=50%
GOBP_POSITIVE_REGULATION_OF_VIRAL_LIFE_CYCLE	GOBP_POSITIVE_REGULATION_OF_VIRAL_LIFE_CYCLE	25	0.3879	1.70732	0.062249	0.107584	0.6	2610	tags=36%, list=19%, signal=44%
GOBP_NEGATIVE_REGULATION_OF_ERK1_AND_ERK2_CASCADE	GOBP_NEGATIVE_REGULATION_OF_ERK1_AND_ERK2_CASCADE	73	0.331632	1.70689	0.0692464	0.107676	0.6	6426	tags=63%, list=46%, signal=116%
GOBP_HEART_VALVE_DEVELOPMENT	GOBP_HEART_VALVE_DEVELOPMENT	61	0.413704	1.70625	0.10251	0.10789	0.603	3463	tags=43%, list=25%, signal=56%
GOBP_BASEMENT_MEMBRANE_ORGANIZATION	GOBP_BASEMENT_MEMBRANE_ORGANIZATION	34	0.499116	1.70584	0.063655	0.107937	0.603	4780	tags=71%, list=34%, signal=107%
GOBP_DENDRITIC_CELL_DIFFERENTIATION	GOBP_DENDRITIC_CELL_DIFFERENTIATION	35	0.529318	1.70548	0.0673267	0.107999	0.603	2795	tags=51%, list=20%, signal=64%
GOBP_RESPONSE_TO_METAL_ION	GOBP_RESPONSE_TO_METAL_ION	232	0.287694	1.70535	0.0230126	0.107931	0.603	3857	tags=39%, list=28%, signal=53%
GOBP_GLYCOSPHINGOLIPID_BIOSYNTHETIC_PROCESS	GOBP_GLYCOSPHINGOLIPID_BIOSYNTHETIC_PROCESS	26	0.508347	1.7053	0.0693878	0.107834	0.603	1961	tags=42%, list=14%, signal=49%
GOBP_NEGATIVE_REGULATION_OF_NATURAL_KILLER_CELL_MEDIATED_IMMUNITY	GOBP_NEGATIVE_REGULATION_OF_NATURAL_KILLER_CELL_MEDIATED_IMMUNITY	16	0.539799	1.70529	0.0219561	0.107718	0.603	2639	tags=56%, list=19%, signal=69%
GOBP_CARDIOCYTE_DIFFERENTIATION	GOBP_CARDIOCYTE_DIFFERENTIATION	172	0.315955	1.70447	0.0910973	0.107962	0.603	2859	tags=28%, list=21%, signal=35%
GOBP_NEGATIVE_REGULATION_OF_OXIDOREDUCTASE_ACTIVITY	GOBP_NEGATIVE_REGULATION_OF_OXIDOREDUCTASE_ACTIVITY	21	0.470623	1.7036	0.042885	0.108257	0.603	4123	tags=57%, list=30%, signal=81%
GOBP_RESPONSE_TO_ZINC_ION	GOBP_RESPONSE_TO_ZINC_ION	21	0.399937	1.70347	0.0100604	0.108197	0.603	3071	tags=43%, list=22%, signal=55%
GOBP_REGULATION_OF_RESPONSE_TO_OXIDATIVE_STRESS	GOBP_REGULATION_OF_RESPONSE_TO_OXIDATIVE_STRESS	90	0.341015	1.70287	0.0287474	0.108341	0.604	3048	tags=36%, list=22%, signal=45%
GOBP_NEGATIVE_REGULATION_OF_POTASSIUM_ION_TRANSMEMBRANE_TRANSPORT	GOBP_NEGATIVE_REGULATION_OF_POTASSIUM_ION_TRANSMEMBRANE_TRANSPORT	23	0.44855	1.70248	0.0576541	0.10838	0.605	3244	tags=48%, list=23%, signal=62%
GOBP_NEGATIVE_REGULATION_OF_BIOMINERAL_TISSUE_DEVELOPMENT	GOBP_NEGATIVE_REGULATION_OF_BIOMINERAL_TISSUE_DEVELOPMENT	19	0.483124	1.70182	0.0638723	0.108604	0.605	4164	tags=58%, list=30%, signal=82%
GOBP_MUSCLE_CELL_DEVELOPMENT	GOBP_MUSCLE_CELL_DEVELOPMENT	202	0.33391	1.70161	0.114108	0.108567	0.605	3462	tags=39%, list=25%, signal=51%
GOBP_NEGATIVE_REGULATION_OF_RECEPTOR_MEDIATED_ENDOCYTOSIS	GOBP_NEGATIVE_REGULATION_OF_RECEPTOR_MEDIATED_ENDOCYTOSIS	24	0.398156	1.70154	0.029703	0.108491	0.605	2946	tags=42%, list=21%, signal=53%
GOBP_REGULATION_OF_MYOBLAST_PROLIFERATION	GOBP_REGULATION_OF_MYOBLAST_PROLIFERATION	21	0.48997	1.70147	0.0424242	0.108416	0.605	2065	tags=33%, list=15%, signal=39%
GOBP_ACTIVATION_OF_PROTEIN_KINASE_B_ACTIVITY	GOBP_ACTIVATION_OF_PROTEIN_KINASE_B_ACTIVITY	21	0.478011	1.70027	0.0307377	0.108839	0.605	3778	tags=57%, list=27%, signal=78%
GOBP_STEROID_CATABOLIC_PROCESS	GOBP_STEROID_CATABOLIC_PROCESS	15	0.553764	1.6992	0.0404624	0.109237	0.606	2593	tags=53%, list=19%, signal=65%
GOBP_REGULATION_OF_LAMELLIPODIUM_ORGANIZATION	GOBP_REGULATION_OF_LAMELLIPODIUM_ORGANIZATION	45	0.451223	1.69914	0.0355649	0.109157	0.606	3608	tags=53%, list=26%, signal=72%
GOBP_POSITIVE_REGULATION_OF_CELL_MIGRATION_INVOLVED_IN_SPROUTING_ANGIOGENESIS	GOBP_POSITIVE_REGULATION_OF_CELL_MIGRATION_INVOLVED_IN_SPROUTING_ANGIOGENESIS	21	0.529111	1.69884	0.0950413	0.10916	0.606	3153	tags=57%, list=23%, signal=74%
GOBP_REGULATION_OF_LAMELLIPODIUM_ASSEMBLY	GOBP_REGULATION_OF_LAMELLIPODIUM_ASSEMBLY	36	0.456701	1.69852	0.0166667	0.109218	0.607	3608	tags=56%, list=26%, signal=75%
GOBP_POSITIVE_REGULATION_OF_HEART_RATE	GOBP_POSITIVE_REGULATION_OF_HEART_RATE	24	0.573739	1.69841	0.00769231	0.109155	0.607	2034	tags=42%, list=15%, signal=49%
GOBP_REGULATION_OF_T_CELL_MEDIATED_CYTOTOXICITY	GOBP_REGULATION_OF_T_CELL_MEDIATED_CYTOTOXICITY	37	0.41783	1.69787	0.0683594	0.109298	0.607	2293	tags=38%, list=16%, signal=45%
GOBP_HEART_VALVE_MORPHOGENESIS	GOBP_HEART_VALVE_MORPHOGENESIS	50	0.423437	1.69776	0.0911017	0.10923	0.607	2205	tags=34%, list=16%, signal=40%
GOBP_DENDRITIC_CELL_CHEMOTAXIS	GOBP_DENDRITIC_CELL_CHEMOTAXIS	15	0.562469	1.69747	0.0543689	0.10925	0.607	800	tags=40%, list=6%, signal=42%
GOBP_POSITIVE_REGULATION_OF_VASCULAR_PERMEABILITY	GOBP_POSITIVE_REGULATION_OF_VASCULAR_PERMEABILITY	18	0.510379	1.69632	0.0411523	0.109719	0.609	2215	tags=44%, list=16%, signal=53%
GOBP_NEGATIVE_REGULATION_OF_INTERLEUKIN_1_PRODUCTION	GOBP_NEGATIVE_REGULATION_OF_INTERLEUKIN_1_PRODUCTION	29	0.480208	1.69629	0.0367347	0.10961	0.609	3778	tags=55%, list=27%, signal=76%
GOBP_NEURON_MATURATION	GOBP_NEURON_MATURATION	49	0.43875	1.6959	0.108384	0.109691	0.609	1742	tags=33%, list=13%, signal=37%
GOBP_SEROTONIN_TRANSPORT	GOBP_SEROTONIN_TRANSPORT	18	0.646077	1.69491	0.0413386	0.110044	0.609	1998	tags=50%, list=14%, signal=58%
GOBP_VASCULAR_ASSOCIATED_SMOOTH_MUSCLE_CELL_PROLIFERATION	GOBP_VASCULAR_ASSOCIATED_SMOOTH_MUSCLE_CELL_PROLIFERATION	72	0.360359	1.6925	0.0704225	0.111165	0.609	7332	tags=79%, list=53%, signal=166%
GOBP_SUBSTRATE_DEPENDENT_CELL_MIGRATION	GOBP_SUBSTRATE_DEPENDENT_CELL_MIGRATION	28	0.458373	1.69183	0.123967	0.111362	0.609	4722	tags=61%, list=34%, signal=92%
GOBP_GLYCOSAMINOGLYCAN_CATABOLIC_PROCESS	GOBP_GLYCOSAMINOGLYCAN_CATABOLIC_PROCESS	23	0.503413	1.69172	0.1	0.111305	0.609	3278	tags=52%, list=24%, signal=68%
GOBP_SECRETION_BY_TISSUE	GOBP_SECRETION_BY_TISSUE	42	0.392769	1.69137	0.0183299	0.111381	0.612	1750	tags=26%, list=13%, signal=30%
GOBP_REGULATION_OF_CELLULAR_RESPONSE_TO_VASCULAR_ENDOTHELIAL_GROWTH_FACTOR_STIMULUS	GOBP_REGULATION_OF_CELLULAR_RESPONSE_TO_VASCULAR_ENDOTHELIAL_GROWTH_FACTOR_STIMULUS	21	0.462111	1.69121	0.0420168	0.111332	0.612	3730	tags=52%, list=27%, signal=71%
GOBP_REGULATION_OF_NITRIC_OXIDE_SYNTHASE_ACTIVITY	GOBP_REGULATION_OF_NITRIC_OXIDE_SYNTHASE_ACTIVITY	31	0.375275	1.69085	0.0476191	0.11139	0.613	1845	tags=29%, list=13%, signal=33%
GOBP_HORMONE_TRANSPORT	GOBP_HORMONE_TRANSPORT	288	0.264536	1.68909	0.0531697	0.112125	0.615	2703	tags=25%, list=19%, signal=30%
GOBP_OLIGODENDROCYTE_DEVELOPMENT	GOBP_OLIGODENDROCYTE_DEVELOPMENT	38	0.364786	1.68859	0.035124	0.112268	0.616	1244	tags=24%, list=9%, signal=26%
GOBP_POSITIVE_REGULATION_OF_RHO_PROTEIN_SIGNAL_TRANSDUCTION	GOBP_POSITIVE_REGULATION_OF_RHO_PROTEIN_SIGNAL_TRANSDUCTION	28	0.474502	1.68661	0.0628803	0.113106	0.616	2498	tags=43%, list=18%, signal=52%
GOBP_RESPONSE_TO_MECHANICAL_STIMULUS	GOBP_RESPONSE_TO_MECHANICAL_STIMULUS	117	0.299013	1.68654	0.0887574	0.113025	0.616	2483	tags=29%, list=18%, signal=35%
GOBP_ENDOCRINE_HORMONE_SECRETION	GOBP_ENDOCRINE_HORMONE_SECRETION	50	0.408525	1.68607	0.0329897	0.113148	0.616	2175	tags=34%, list=16%, signal=40%
GOBP_REGULATION_OF_PLATELET_DERIVED_GROWTH_FACTOR_RECEPTOR_SIGNALING_PATHWAY	GOBP_REGULATION_OF_PLATELET_DERIVED_GROWTH_FACTOR_RECEPTOR_SIGNALING_PATHWAY	23	0.437253	1.68589	0.0798403	0.113131	0.616	3267	tags=48%, list=23%, signal=62%
GOBP_ALPHA_BETA_T_CELL_LINEAGE_COMMITMENT	GOBP_ALPHA_BETA_T_CELL_LINEAGE_COMMITMENT	15	0.536007	1.6858	0.0447471	0.113034	0.616	1988	tags=40%, list=14%, signal=47%
GOBP_EXTRACELLULAR_MATRIX_ASSEMBLY	GOBP_EXTRACELLULAR_MATRIX_ASSEMBLY	41	0.465042	1.68575	0.128631	0.112938	0.616	4893	tags=66%, list=35%, signal=101%
GOBP_PURINE_RIBONUCLEOTIDE_CATABOLIC_PROCESS	GOBP_PURINE_RIBONUCLEOTIDE_CATABOLIC_PROCESS	33	0.450632	1.68555	0.0402414	0.11291	0.616	3335	tags=55%, list=24%, signal=72%
GOBP_MUSCLE_TISSUE_DEVELOPMENT	GOBP_MUSCLE_TISSUE_DEVELOPMENT	417	0.29355	1.68528	0.0829876	0.112901	0.616	3549	tags=35%, list=25%, signal=45%
GOBP_SARCOPLASMIC_RETICULUM_CALCIUM_ION_TRANSPORT	GOBP_SARCOPLASMIC_RETICULUM_CALCIUM_ION_TRANSPORT	30	0.451211	1.68413	0.0482897	0.113306	0.617	4403	tags=60%, list=32%, signal=88%
GOBP_POSITIVE_REGULATION_OF_MUSCLE_CELL_DIFFERENTIATION	GOBP_POSITIVE_REGULATION_OF_MUSCLE_CELL_DIFFERENTIATION	71	0.357345	1.68355	0.0807453	0.1135	0.62	3151	tags=38%, list=23%, signal=49%
GOBP_IRON_ION_TRANSMEMBRANE_TRANSPORT	GOBP_IRON_ION_TRANSMEMBRANE_TRANSPORT	19	0.46114	1.68349	0.0227273	0.113401	0.62	6119	tags=79%, list=44%, signal=141%
GOBP_T_CELL_HOMEOSTASIS	GOBP_T_CELL_HOMEOSTASIS	45	0.388176	1.68183	0.0334728	0.114167	0.621	4208	tags=49%, list=30%, signal=70%
GOBP_ACUTE_INFLAMMATORY_RESPONSE_TO_ANTIGENIC_STIMULUS	GOBP_ACUTE_INFLAMMATORY_RESPONSE_TO_ANTIGENIC_STIMULUS	19	0.575331	1.68182	0.0798403	0.114047	0.621	1948	tags=47%, list=14%, signal=55%
GOBP_BONE_MINERALIZATION	GOBP_BONE_MINERALIZATION	109	0.351007	1.6816	0.0622407	0.114018	0.621	1912	tags=26%, list=14%, signal=30%
GOBP_RHO_PROTEIN_SIGNAL_TRANSDUCTION	GOBP_RHO_PROTEIN_SIGNAL_TRANSDUCTION	126	0.343437	1.68061	0.108652	0.114448	0.624	3149	tags=34%, list=23%, signal=44%
GOBP_G_PROTEIN_COUPLED_RECEPTOR_SIGNALING_PATHWAY_INVOLVED_IN_HEART_PROCESS	GOBP_G_PROTEIN_COUPLED_RECEPTOR_SIGNALING_PATHWAY_INVOLVED_IN_HEART_PROCESS	16	0.476686	1.68015	0.0343434	0.114563	0.624	4092	tags=56%, list=29%, signal=80%
GOBP_PURINE_CONTAINING_COMPOUND_CATABOLIC_PROCESS	GOBP_PURINE_CONTAINING_COMPOUND_CATABOLIC_PROCESS	48	0.421083	1.67945	0.0241935	0.11481	0.624	3042	tags=46%, list=22%, signal=58%
GOBP_STRIATED_MUSCLE_CELL_DIFFERENTIATION	GOBP_STRIATED_MUSCLE_CELL_DIFFERENTIATION	290	0.323586	1.67793	0.0708333	0.115491	0.625	3549	tags=39%, list=25%, signal=51%
GOBP_NEGATIVE_REGULATION_OF_COLLAGEN_METABOLIC_PROCESS	GOBP_NEGATIVE_REGULATION_OF_COLLAGEN_METABOLIC_PROCESS	15	0.506841	1.6774	0.0165975	0.115647	0.625	2081	tags=47%, list=15%, signal=55%
GOBP_NEUROTRANSMITTER_TRANSPORT	GOBP_NEUROTRANSMITTER_TRANSPORT	148	0.262932	1.67738	0.0318091	0.115528	0.625	3252	tags=30%, list=23%, signal=39%
GOBP_POSITIVE_REGULATION_OF_NEURON_PROJECTION_DEVELOPMENT	GOBP_POSITIVE_REGULATION_OF_NEURON_PROJECTION_DEVELOPMENT	207	0.281103	1.67696	0.11134	0.115611	0.625	3742	tags=35%, list=27%, signal=47%
GOBP_T_CELL_DIFFERENTIATION_INVOLVED_IN_IMMUNE_RESPONSE	GOBP_T_CELL_DIFFERENTIATION_INVOLVED_IN_IMMUNE_RESPONSE	59	0.374367	1.67583	0.0899796	0.116103	0.625	1988	tags=25%, list=14%, signal=30%
GOBP_POSITIVE_REGULATION_OF_CATION_TRANSMEMBRANE_TRANSPORT	GOBP_POSITIVE_REGULATION_OF_CATION_TRANSMEMBRANE_TRANSPORT	131	0.329955	1.67582	0.0592885	0.115985	0.625	3396	tags=38%, list=24%, signal=50%
GOBP_CARDIAC_ATRIUM_DEVELOPMENT	GOBP_CARDIAC_ATRIUM_DEVELOPMENT	33	0.475787	1.67546	0.0688259	0.116047	0.625	2666	tags=36%, list=19%, signal=45%
GOBP_ERBB_SIGNALING_PATHWAY	GOBP_ERBB_SIGNALING_PATHWAY	108	0.325772	1.67435	0.103239	0.116503	0.627	3412	tags=36%, list=24%, signal=47%
GOBP_REGULATION_OF_TOLERANCE_INDUCTION	GOBP_REGULATION_OF_TOLERANCE_INDUCTION	15	0.502499	1.67342	0.0459082	0.116848	0.627	3488	tags=53%, list=25%, signal=71%
GOBP_REGULATORY_T_CELL_DIFFERENTIATION	GOBP_REGULATORY_T_CELL_DIFFERENTIATION	32	0.481273	1.67325	0.0570265	0.116795	0.627	2639	tags=41%, list=19%, signal=50%
GOBP_NEGATIVE_REGULATION_OF_SMOOTH_MUSCLE_CELL_MIGRATION	GOBP_NEGATIVE_REGULATION_OF_SMOOTH_MUSCLE_CELL_MIGRATION	36	0.43849	1.67305	0.048583	0.116766	0.627	3850	tags=58%, list=28%, signal=80%
GOBP_REGULATION_OF_RESPONSE_TO_CYTOKINE_STIMULUS	GOBP_REGULATION_OF_RESPONSE_TO_CYTOKINE_STIMULUS	135	0.338498	1.66958	0.0438413	0.118351	0.627	2506	tags=30%, list=18%, signal=36%
GOBP_REGULATION_OF_STEROID_HORMONE_BIOSYNTHETIC_PROCESS	GOBP_REGULATION_OF_STEROID_HORMONE_BIOSYNTHETIC_PROCESS	18	0.466818	1.66952	0.0368098	0.118259	0.627	2520	tags=39%, list=18%, signal=47%
GOBP_STEM_CELL_DEVELOPMENT	GOBP_STEM_CELL_DEVELOPMENT	83	0.360531	1.66829	0.101266	0.118802	0.629	3529	tags=37%, list=25%, signal=50%
GOBP_REGULATION_OF_HEART_CONTRACTION	GOBP_REGULATION_OF_HEART_CONTRACTION	158	0.32867	1.66751	0.059761	0.119042	0.629	3421	tags=36%, list=25%, signal=47%
GOBP_PLASMA_LIPOPROTEIN_PARTICLE_CLEARANCE	GOBP_PLASMA_LIPOPROTEIN_PARTICLE_CLEARANCE	28	0.377744	1.66723	0.0320641	0.119046	0.629	6076	tags=64%, list=44%, signal=114%
GOBP_TRANSEPITHELIAL_TRANSPORT	GOBP_TRANSEPITHELIAL_TRANSPORT	26	0.457887	1.66719	0.044898	0.118944	0.629	2430	tags=38%, list=17%, signal=47%
GOBP_ACTIVATION_OF_CYSTEINE_TYPE_ENDOPEPTIDASE_ACTIVITY_INVOLVED_IN_APOPTOTIC_PROCESS	GOBP_ACTIVATION_OF_CYSTEINE_TYPE_ENDOPEPTIDASE_ACTIVITY_INVOLVED_IN_APOPTOTIC_PROCESS	67	0.355356	1.66664	0.0329897	0.119118	0.629	3761	tags=42%, list=27%, signal=57%
GOBP_IMMUNE_SYSTEM_DEVELOPMENT	GOBP_IMMUNE_SYSTEM_DEVELOPMENT	183	0.282466	1.66571	0.146881	0.119478	0.629	2367	tags=22%, list=17%, signal=27%
GOBP_POSITIVE_REGULATION_OF_BONE_RESORPTION	GOBP_POSITIVE_REGULATION_OF_BONE_RESORPTION	21	0.463542	1.66538	0.0679012	0.119558	0.63	687	tags=24%, list=5%, signal=25%
GOBP_SULFUR_COMPOUND_CATABOLIC_PROCESS	GOBP_SULFUR_COMPOUND_CATABOLIC_PROCESS	29	0.4986	1.6653	0.0443975	0.119473	0.63	3278	tags=55%, list=24%, signal=72%
GOBP_DECIDUALIZATION	GOBP_DECIDUALIZATION	21	0.37572	1.66481	0.0268595	0.119586	0.63	3529	tags=43%, list=25%, signal=57%
GOBP_REGULATION_OF_CARDIAC_MUSCLE_CONTRACTION	GOBP_REGULATION_OF_CARDIAC_MUSCLE_CONTRACTION	61	0.346937	1.66453	0.062753	0.119633	0.63	4949	tags=51%, list=36%, signal=78%
GOBP_NEGATIVE_REGULATION_OF_EXTRINSIC_APOPTOTIC_SIGNALING_PATHWAY_VIA_DEATH_DOMAIN_RECEPTORS	GOBP_NEGATIVE_REGULATION_OF_EXTRINSIC_APOPTOTIC_SIGNALING_PATHWAY_VIA_DEATH_DOMAIN_RECEPTORS	24	0.416659	1.6633	0.0446247	0.120132	0.63	6362	tags=75%, list=46%, signal=138%
GOBP_REGULATION_OF_HORMONE_SECRETION	GOBP_REGULATION_OF_HORMONE_SECRETION	237	0.269236	1.66202	0.0711382	0.120735	0.63	2703	tags=25%, list=19%, signal=31%
GOBP_AXONAL_FASCICULATION	GOBP_AXONAL_FASCICULATION	24	0.461365	1.66179	0.0270833	0.12072	0.63	3104	tags=38%, list=22%, signal=48%
GOBP_NITRIC_OXIDE_SYNTHASE_BIOSYNTHETIC_PROCESS	GOBP_NITRIC_OXIDE_SYNTHASE_BIOSYNTHETIC_PROCESS	26	0.452796	1.66157	0.0329897	0.120709	0.63	2341	tags=38%, list=17%, signal=46%
GOBP_REGULATION_OF_NEURAL_PRECURSOR_CELL_PROLIFERATION	GOBP_REGULATION_OF_NEURAL_PRECURSOR_CELL_PROLIFERATION	99	0.324597	1.66121	0.0746888	0.120776	0.631	2414	tags=27%, list=17%, signal=33%
GOBP_LOW_DENSITY_LIPOPROTEIN_PARTICLE_CLEARANCE	GOBP_LOW_DENSITY_LIPOPROTEIN_PARTICLE_CLEARANCE	18	0.38884	1.66108	0.0306122	0.120737	0.631	6076	tags=67%, list=44%, signal=118%
GOBP_LABYRINTHINE_LAYER_MORPHOGENESIS	GOBP_LABYRINTHINE_LAYER_MORPHOGENESIS	25	0.43567	1.66064	0.0723404	0.120832	0.631	602	tags=16%, list=4%, signal=17%
GOBP_IRON_ION_TRANSPORT	GOBP_IRON_ION_TRANSPORT	45	0.404573	1.66054	0.00627615	0.120766	0.631	6139	tags=67%, list=44%, signal=119%
GOBP_REGULATION_OF_ERBB_SIGNALING_PATHWAY	GOBP_REGULATION_OF_ERBB_SIGNALING_PATHWAY	68	0.326083	1.6604	0.0770791	0.120716	0.631	3302	tags=37%, list=24%, signal=48%
GOBP_REGULATION_OF_PROTEIN_CONTAINING_COMPLEX_ASSEMBLY	GOBP_REGULATION_OF_PROTEIN_CONTAINING_COMPLEX_ASSEMBLY	385	0.295805	1.66038	0.0559006	0.120609	0.631	3730	tags=37%, list=27%, signal=49%
GOBP_POSITIVE_REGULATION_OF_CARDIAC_MUSCLE_CELL_PROLIFERATION	GOBP_POSITIVE_REGULATION_OF_CARDIAC_MUSCLE_CELL_PROLIFERATION	23	0.409421	1.65991	0.0302419	0.12075	0.631	4165	tags=52%, list=30%, signal=74%
GOBP_REGULATION_OF_HYDROGEN_PEROXIDE_METABOLIC_PROCESS	GOBP_REGULATION_OF_HYDROGEN_PEROXIDE_METABOLIC_PROCESS	17	0.487908	1.65989	0.0242424	0.12064	0.631	1714	tags=35%, list=12%, signal=40%
GOBP_NEGATIVE_REGULATION_OF_INTERLEUKIN_17_PRODUCTION	GOBP_NEGATIVE_REGULATION_OF_INTERLEUKIN_17_PRODUCTION	15	0.477444	1.65984	0.0610998	0.120555	0.631	981	tags=33%, list=7%, signal=36%
GOBP_POSITIVE_REGULATION_OF_ORGAN_GROWTH	GOBP_POSITIVE_REGULATION_OF_ORGAN_GROWTH	50	0.353051	1.65979	0.0307377	0.120468	0.631	3017	tags=36%, list=22%, signal=46%
GOBP_POSITIVE_REGULATION_OF_T_CELL_CYTOKINE_PRODUCTION	GOBP_POSITIVE_REGULATION_OF_T_CELL_CYTOKINE_PRODUCTION	19	0.380829	1.65964	0.035124	0.120415	0.631	1644	tags=26%, list=12%, signal=30%
GOBP_NEGATIVE_REGULATION_OF_CALCIUM_ION_TRANSPORT	GOBP_NEGATIVE_REGULATION_OF_CALCIUM_ION_TRANSPORT	62	0.358099	1.65916	0.0731707	0.120565	0.631	3412	tags=42%, list=24%, signal=55%
GOBP_REGULATION_OF_REACTIVE_OXYGEN_SPECIES_METABOLIC_PROCESS	GOBP_REGULATION_OF_REACTIVE_OXYGEN_SPECIES_METABOLIC_PROCESS	138	0.363579	1.65861	0.0207039	0.120732	0.631	4874	tags=51%, list=35%, signal=78%
GOBP_POSITIVE_REGULATION_OF_MYELINATION	GOBP_POSITIVE_REGULATION_OF_MYELINATION	22	0.430522	1.65806	0.0488798	0.12092	0.631	1839	tags=32%, list=13%, signal=37%
GOBP_NEGATIVE_REGULATION_OF_MAPK_CASCADE	GOBP_NEGATIVE_REGULATION_OF_MAPK_CASCADE	169	0.307728	1.65805	0.0389344	0.120802	0.631	3623	tags=34%, list=26%, signal=46%
GOBP_AMIDE_TRANSPORT	GOBP_AMIDE_TRANSPORT	300	0.271541	1.65778	0.0306122	0.120847	0.633	3500	tags=31%, list=25%, signal=40%
GOBP_NEGATIVE_REGULATION_OF_PHAGOCYTOSIS	GOBP_NEGATIVE_REGULATION_OF_PHAGOCYTOSIS	24	0.488311	1.65624	0.0562016	0.121572	0.634	2772	tags=50%, list=20%, signal=62%
GOBP_POSITIVE_REGULATION_OF_HEART_GROWTH	GOBP_POSITIVE_REGULATION_OF_HEART_GROWTH	40	0.346853	1.65593	0.0504032	0.121608	0.634	3017	tags=35%, list=22%, signal=45%
GOBP_RESPONSE_TO_PURINE_CONTAINING_COMPOUND	GOBP_RESPONSE_TO_PURINE_CONTAINING_COMPOUND	94	0.341735	1.65498	0.0681363	0.121939	0.637	2163	tags=28%, list=16%, signal=33%
GOBP_REGULATION_OF_T_CELL_DIFFERENTIATION	GOBP_REGULATION_OF_T_CELL_DIFFERENTIATION	155	0.318865	1.65429	0.128099	0.122195	0.637	2379	tags=23%, list=17%, signal=28%
GOBP_REGULATION_OF_MITOCHONDRIAL_MEMBRANE_POTENTIAL	GOBP_REGULATION_OF_MITOCHONDRIAL_MEMBRANE_POTENTIAL	78	0.388882	1.65228	0.0228216	0.123067	0.637	5557	tags=65%, list=40%, signal=108%
GOBP_REGULATION_OF_PEPTIDE_TRANSPORT	GOBP_REGULATION_OF_PEPTIDE_TRANSPORT	195	0.28165	1.65167	0.0618557	0.123213	0.637	2779	tags=26%, list=20%, signal=32%
GOBP_POSITIVE_REGULATION_OF_LEUKOCYTE_APOPTOTIC_PROCESS	GOBP_POSITIVE_REGULATION_OF_LEUKOCYTE_APOPTOTIC_PROCESS	29	0.419597	1.65136	0.0501044	0.123264	0.637	5323	tags=55%, list=38%, signal=89%
GOBP_POSITIVE_REGULATION_OF_B_CELL_DIFFERENTIATION	GOBP_POSITIVE_REGULATION_OF_B_CELL_DIFFERENTIATION	15	0.528687	1.65125	0.0607843	0.12321	0.637	752	tags=33%, list=5%, signal=35%
GOBP_SINGLE_FERTILIZATION	GOBP_SINGLE_FERTILIZATION	86	0.299539	1.65044	0.0262626	0.123517	0.637	6266	tags=56%, list=45%, signal=101%
GOBP_ENDODERM_FORMATION	GOBP_ENDODERM_FORMATION	30	0.431528	1.65033	0.042735	0.123443	0.637	1617	tags=27%, list=12%, signal=30%
GOBP_MYOTUBE_DIFFERENTIATION	GOBP_MYOTUBE_DIFFERENTIATION	118	0.353847	1.65031	0.0742268	0.123325	0.637	3657	tags=45%, list=26%, signal=60%
GOBP_REGULATION_OF_RECEPTOR_RECYCLING	GOBP_REGULATION_OF_RECEPTOR_RECYCLING	27	0.378637	1.64962	0.0141129	0.123581	0.639	5177	tags=59%, list=37%, signal=94%
GOBP_REGULATION_OF_THE_FORCE_OF_HEART_CONTRACTION	GOBP_REGULATION_OF_THE_FORCE_OF_HEART_CONTRACTION	26	0.436749	1.64945	0.060241	0.123573	0.639	6264	tags=69%, list=45%, signal=126%
GOBP_STEROID_HORMONE_BIOSYNTHETIC_PROCESS	GOBP_STEROID_HORMONE_BIOSYNTHETIC_PROCESS	28	0.438904	1.64896	0.0391753	0.123703	0.639	3599	tags=39%, list=26%, signal=53%
GOBP_POSITIVE_REGULATION_OF_RECEPTOR_RECYCLING	GOBP_POSITIVE_REGULATION_OF_RECEPTOR_RECYCLING	17	0.479799	1.647	0.0464646	0.124563	0.64	2092	tags=47%, list=15%, signal=55%
GOBP_REGULATION_OF_LONG_TERM_SYNAPTIC_POTENTIATION	GOBP_REGULATION_OF_LONG_TERM_SYNAPTIC_POTENTIATION	45	0.34389	1.64689	0.0733591	0.124492	0.64	1693	tags=24%, list=12%, signal=28%
GOBP_SMOOTH_MUSCLE_CELL_DIFFERENTIATION	GOBP_SMOOTH_MUSCLE_CELL_DIFFERENTIATION	73	0.385926	1.6468	0.135699	0.124396	0.64	3396	tags=38%, list=24%, signal=50%
GOBP_REGULATION_OF_CELLULAR_RESPONSE_TO_GROWTH_FACTOR_STIMULUS	GOBP_REGULATION_OF_CELLULAR_RESPONSE_TO_GROWTH_FACTOR_STIMULUS	277	0.279933	1.64585	0.124736	0.124704	0.642	3529	tags=33%, list=25%, signal=44%
GOBP_NEGATIVE_REGULATION_OF_SIGNALING_RECEPTOR_ACTIVITY	GOBP_NEGATIVE_REGULATION_OF_SIGNALING_RECEPTOR_ACTIVITY	29	0.393196	1.6456	0.033195	0.124685	0.642	1989	tags=28%, list=14%, signal=32%
GOBP_VENOUS_BLOOD_VESSEL_DEVELOPMENT	GOBP_VENOUS_BLOOD_VESSEL_DEVELOPMENT	17	0.497542	1.6454	0.113636	0.124682	0.642	1716	tags=35%, list=12%, signal=40%
GOBP_RENAL_SODIUM_EXCRETION	GOBP_RENAL_SODIUM_EXCRETION	20	0.48073	1.6453	0.0361446	0.124608	0.642	2200	tags=40%, list=16%, signal=47%
GOBP_NOREPINEPHRINE_TRANSPORT	GOBP_NOREPINEPHRINE_TRANSPORT	19	0.523954	1.64515	0.0147059	0.124549	0.642	2081	tags=37%, list=15%, signal=43%
GOBP_NEGATIVE_REGULATION_OF_ALPHA_BETA_T_CELL_ACTIVATION	GOBP_NEGATIVE_REGULATION_OF_ALPHA_BETA_T_CELL_ACTIVATION	34	0.439786	1.64511	0.0438413	0.124441	0.642	3132	tags=41%, list=22%, signal=53%
GOBP_CARDIAC_MUSCLE_CELL_DIFFERENTIATION	GOBP_CARDIAC_MUSCLE_CELL_DIFFERENTIATION	136	0.311341	1.64507	0.105809	0.124336	0.642	3050	tags=29%, list=22%, signal=37%
GOBP_REGULATION_OF_TRANSPORTER_ACTIVITY	GOBP_REGULATION_OF_TRANSPORTER_ACTIVITY	236	0.279388	1.64502	0.0730223	0.12424	0.642	3396	tags=36%, list=24%, signal=46%
GOBP_MEMBRANE_PROTEIN_ECTODOMAIN_PROTEOLYSIS	GOBP_MEMBRANE_PROTEIN_ECTODOMAIN_PROTEOLYSIS	41	0.401282	1.6446	0.0283976	0.124291	0.642	5234	tags=63%, list=38%, signal=101%
GOBP_REGULATION_OF_OSTEOBLAST_PROLIFERATION	GOBP_REGULATION_OF_OSTEOBLAST_PROLIFERATION	28	0.451516	1.6442	0.0816327	0.124361	0.643	1912	tags=29%, list=14%, signal=33%
GOBP_POSITIVE_REGULATION_OF_NEURAL_PRECURSOR_CELL_PROLIFERATION	GOBP_POSITIVE_REGULATION_OF_NEURAL_PRECURSOR_CELL_PROLIFERATION	59	0.383166	1.64376	0.117647	0.124444	0.643	2414	tags=31%, list=17%, signal=37%
GOBP_REGULATION_OF_GLUTAMATE_SECRETION	GOBP_REGULATION_OF_GLUTAMATE_SECRETION	16	0.502096	1.64263	0.0411765	0.12487	0.645	3790	tags=56%, list=27%, signal=77%
GOBP_BIOGENIC_AMINE_METABOLIC_PROCESS	GOBP_BIOGENIC_AMINE_METABOLIC_PROCESS	67	0.382306	1.6425	0.0513347	0.124808	0.645	5933	tags=64%, list=43%, signal=111%
GOBP_REGULATION_OF_DEFENSE_RESPONSE_TO_BACTERIUM	GOBP_REGULATION_OF_DEFENSE_RESPONSE_TO_BACTERIUM	21	0.485917	1.64116	0.0352697	0.125332	0.649	2684	tags=43%, list=19%, signal=53%
GOBP_MYELOID_DENDRITIC_CELL_ACTIVATION	GOBP_MYELOID_DENDRITIC_CELL_ACTIVATION	31	0.53305	1.6407	0.105058	0.125423	0.649	2205	tags=45%, list=16%, signal=54%
GOBP_REGULATION_OF_DEFENSE_RESPONSE_TO_VIRUS	GOBP_REGULATION_OF_DEFENSE_RESPONSE_TO_VIRUS	70	0.347411	1.64052	0.0308008	0.125392	0.649	2024	tags=26%, list=15%, signal=30%
GOBP_POSITIVE_REGULATION_OF_PROTEIN_SERINE_THREONINE_KINASE_ACTIVITY	GOBP_POSITIVE_REGULATION_OF_PROTEIN_SERINE_THREONINE_KINASE_ACTIVITY	178	0.305588	1.64024	0.0823045	0.125436	0.649	4505	tags=42%, list=32%, signal=61%
GOBP_REGULATION_OF_LEUKOCYTE_TETHERING_OR_ROLLING	GOBP_REGULATION_OF_LEUKOCYTE_TETHERING_OR_ROLLING	16	0.685854	1.63983	0.0554455	0.125513	0.649	1483	tags=56%, list=11%, signal=63%
GOBP_REGULATION_OF_VOLTAGE_GATED_CALCIUM_CHANNEL_ACTIVITY	GOBP_REGULATION_OF_VOLTAGE_GATED_CALCIUM_CHANNEL_ACTIVITY	31	0.405813	1.6393	0.0755467	0.125701	0.649	4045	tags=55%, list=29%, signal=77%
GOBP_REGULATION_OF_CYTOSKELETON_ORGANIZATION	GOBP_REGULATION_OF_CYTOSKELETON_ORGANIZATION	491	0.3006	1.63923	0.125257	0.125606	0.649	4447	tags=42%, list=32%, signal=59%
GOBP_MUSCLE_CELL_DIFFERENTIATION	GOBP_MUSCLE_CELL_DIFFERENTIATION	396	0.306333	1.63862	0.0935551	0.125824	0.651	3463	tags=35%, list=25%, signal=46%
GOBP_ARTERY_DEVELOPMENT	GOBP_ARTERY_DEVELOPMENT	104	0.367039	1.63843	0.146341	0.125797	0.651	2492	tags=29%, list=18%, signal=35%
GOBP_ACTOMYOSIN_STRUCTURE_ORGANIZATION	GOBP_ACTOMYOSIN_STRUCTURE_ORGANIZATION	194	0.343145	1.63776	0.0963115	0.126032	0.651	3455	tags=41%, list=25%, signal=53%
GOBP_BIOMINERAL_TISSUE_DEVELOPMENT	GOBP_BIOMINERAL_TISSUE_DEVELOPMENT	140	0.337335	1.63692	0.0709812	0.126375	0.651	2114	tags=26%, list=15%, signal=31%
GOBP_POSITIVE_REGULATION_OF_DEFENSE_RESPONSE_TO_VIRUS_BY_HOST	GOBP_POSITIVE_REGULATION_OF_DEFENSE_RESPONSE_TO_VIRUS_BY_HOST	25	0.408146	1.6368	0.0606695	0.126308	0.651	3761	tags=44%, list=27%, signal=60%
GOBP_NEGATIVE_REGULATION_OF_DNA_DAMAGE_RESPONSE_SIGNAL_TRANSDUCTION_BY_P53_CLASS_MEDIATOR	GOBP_NEGATIVE_REGULATION_OF_DNA_DAMAGE_RESPONSE_SIGNAL_TRANSDUCTION_BY_P53_CLASS_MEDIATOR	15	0.438435	1.63647	0.00414079	0.126314	0.651	4631	tags=67%, list=33%, signal=100%
GOBP_LUNG_EPITHELIUM_DEVELOPMENT	GOBP_LUNG_EPITHELIUM_DEVELOPMENT	48	0.353564	1.63612	0.0164609	0.126386	0.651	4249	tags=42%, list=30%, signal=60%
GOBP_AMINE_BIOSYNTHETIC_PROCESS	GOBP_AMINE_BIOSYNTHETIC_PROCESS	29	0.426627	1.63572	0.0363636	0.126487	0.651	1765	tags=34%, list=13%, signal=39%
GOBP_REGULATION_OF_CELL_MATRIX_ADHESION	GOBP_REGULATION_OF_CELL_MATRIX_ADHESION	118	0.355809	1.6352	0.0701031	0.126639	0.651	3570	tags=40%, list=26%, signal=53%
GOBP_POSITIVE_REGULATION_OF_EXOCYTOSIS	GOBP_POSITIVE_REGULATION_OF_EXOCYTOSIS	78	0.3002	1.63307	0.0371134	0.127683	0.653	1740	tags=22%, list=12%, signal=25%
GOBP_REGULATION_OF_ENDOTHELIAL_CELL_DIFFERENTIATION	GOBP_REGULATION_OF_ENDOTHELIAL_CELL_DIFFERENTIATION	38	0.393376	1.63303	0.083503	0.127574	0.653	1692	tags=29%, list=12%, signal=33%
GOBP_HORMONE_BIOSYNTHETIC_PROCESS	GOBP_HORMONE_BIOSYNTHETIC_PROCESS	40	0.389532	1.63282	0.0165289	0.12754	0.654	3599	tags=40%, list=26%, signal=54%
GOBP_REGULATION_OF_CELL_GROWTH_INVOLVED_IN_CARDIAC_MUSCLE_CELL_DEVELOPMENT	GOBP_REGULATION_OF_CELL_GROWTH_INVOLVED_IN_CARDIAC_MUSCLE_CELL_DEVELOPMENT	30	0.388456	1.63248	0.0145228	0.127589	0.654	1366	tags=27%, list=10%, signal=30%
GOBP_CD4_POSITIVE_OR_CD8_POSITIVE_ALPHA_BETA_T_CELL_LINEAGE_COMMITMENT	GOBP_CD4_POSITIVE_OR_CD8_POSITIVE_ALPHA_BETA_T_CELL_LINEAGE_COMMITMENT	16	0.517315	1.63213	0.0529412	0.127665	0.654	1988	tags=38%, list=14%, signal=44%
GOBP_COPULATION	GOBP_COPULATION	17	0.552429	1.6313	0.0309917	0.128005	0.654	3396	tags=47%, list=24%, signal=62%
GOBP_POSITIVE_REGULATION_OF_PHOSPHOPROTEIN_PHOSPHATASE_ACTIVITY	GOBP_POSITIVE_REGULATION_OF_PHOSPHOPROTEIN_PHOSPHATASE_ACTIVITY	18	0.452408	1.63117	0.0722656	0.127956	0.654	1133	tags=28%, list=8%, signal=30%
GOBP_AMINE_METABOLIC_PROCESS	GOBP_AMINE_METABOLIC_PROCESS	79	0.370537	1.63087	0.0603622	0.128011	0.654	5933	tags=62%, list=43%, signal=107%
GOBP_POSITIVE_REGULATION_OF_NLRP3_INFLAMMASOME_COMPLEX_ASSEMBLY	GOBP_POSITIVE_REGULATION_OF_NLRP3_INFLAMMASOME_COMPLEX_ASSEMBLY	18	0.467744	1.63079	0.0526316	0.127943	0.658	1480	tags=33%, list=11%, signal=37%
GOBP_C21_STEROID_HORMONE_BIOSYNTHETIC_PROCESS	GOBP_C21_STEROID_HORMONE_BIOSYNTHETIC_PROCESS	16	0.505405	1.62963	0.0507099	0.128405	0.658	3381	tags=38%, list=24%, signal=49%
GOBP_CATECHOLAMINE_TRANSPORT	GOBP_CATECHOLAMINE_TRANSPORT	55	0.396772	1.62944	0.054326	0.128404	0.66	3209	tags=40%, list=23%, signal=52%
GOBP_EMBRYONIC_DIGESTIVE_TRACT_DEVELOPMENT	GOBP_EMBRYONIC_DIGESTIVE_TRACT_DEVELOPMENT	22	0.49897	1.62943	0.0377359	0.128293	0.66	886	tags=27%, list=6%, signal=29%
GOBP_REGULATION_OF_HEART_RATE	GOBP_REGULATION_OF_HEART_RATE	85	0.408199	1.62908	0.0518234	0.12837	0.66	2084	tags=31%, list=15%, signal=36%
GOBP_CARDIAC_CELL_DEVELOPMENT	GOBP_CARDIAC_CELL_DEVELOPMENT	105	0.321867	1.62889	0.119588	0.128342	0.66	2859	tags=30%, list=21%, signal=38%
GOBP_GLIAL_CELL_PROLIFERATION	GOBP_GLIAL_CELL_PROLIFERATION	67	0.319074	1.62882	0.0639659	0.128252	0.66	1823	tags=25%, list=13%, signal=29%
GOBP_POSITIVE_REGULATION_OF_GLIOGENESIS	GOBP_POSITIVE_REGULATION_OF_GLIOGENESIS	74	0.303571	1.62725	0.0587045	0.128983	0.663	3404	tags=35%, list=24%, signal=46%
GOBP_NUCLEOTIDE_SUGAR_METABOLIC_PROCESS	GOBP_NUCLEOTIDE_SUGAR_METABOLIC_PROCESS	33	0.431728	1.6268	0.0344828	0.12907	0.663	4626	tags=67%, list=33%, signal=100%
GOBP_RESPONSE_TO_HYDROGEN_PEROXIDE	GOBP_RESPONSE_TO_HYDROGEN_PEROXIDE	108	0.330202	1.6262	0.0207039	0.129218	0.663	3601	tags=41%, list=26%, signal=55%
GOBP_ORGAN_OR_TISSUE_SPECIFIC_IMMUNE_RESPONSE	GOBP_ORGAN_OR_TISSUE_SPECIFIC_IMMUNE_RESPONSE	16	0.508614	1.62603	0.054	0.129178	0.663	3390	tags=50%, list=24%, signal=66%
GOBP_REGULATION_OF_NEUROTRANSMITTER_LEVELS	GOBP_REGULATION_OF_NEUROTRANSMITTER_LEVELS	161	0.263651	1.626	0.0340681	0.129069	0.663	3252	tags=30%, list=23%, signal=39%
GOBP_PATHWAY_RESTRICTED_SMAD_PROTEIN_PHOSPHORYLATION	GOBP_PATHWAY_RESTRICTED_SMAD_PROTEIN_PHOSPHORYLATION	51	0.336867	1.6257	0.0966387	0.129122	0.663	2730	tags=33%, list=20%, signal=41%
GOBP_ADAPTATION_OF_SIGNALING_PATHWAY	GOBP_ADAPTATION_OF_SIGNALING_PATHWAY	22	0.47083	1.62559	0.0781893	0.12907	0.663	5321	tags=64%, list=38%, signal=103%
GOBP_POSITIVE_REGULATION_OF_INTERLEUKIN_2_PRODUCTION	GOBP_POSITIVE_REGULATION_OF_INTERLEUKIN_2_PRODUCTION	35	0.360131	1.62545	0.0613861	0.129019	0.663	4403	tags=49%, list=32%, signal=71%
GOBP_HYDROGEN_PEROXIDE_METABOLIC_PROCESS	GOBP_HYDROGEN_PEROXIDE_METABOLIC_PROCESS	39	0.451097	1.62467	0.0766045	0.129327	0.664	4730	tags=64%, list=34%, signal=97%
GOBP_REGULATION_OF_MONOCYTE_DIFFERENTIATION	GOBP_REGULATION_OF_MONOCYTE_DIFFERENTIATION	16	0.498042	1.62374	0.0924025	0.129687	0.665	2379	tags=44%, list=17%, signal=53%
GOBP_KILLING_OF_CELLS_OF_ANOTHER_ORGANISM	GOBP_KILLING_OF_CELLS_OF_ANOTHER_ORGANISM	37	0.504559	1.62365	0.0232558	0.129601	0.665	3795	tags=57%, list=27%, signal=78%
GOBP_NEGATIVE_REGULATION_OF_PROTEIN_CONTAINING_COMPLEX_ASSEMBLY	GOBP_NEGATIVE_REGULATION_OF_PROTEIN_CONTAINING_COMPLEX_ASSEMBLY	137	0.303428	1.62331	0.0206186	0.12968	0.667	4680	tags=47%, list=34%, signal=71%
GOBP_REGULATION_OF_DEFENSE_RESPONSE_TO_VIRUS_BY_HOST	GOBP_REGULATION_OF_DEFENSE_RESPONSE_TO_VIRUS_BY_HOST	34	0.357518	1.62228	0.0737705	0.130116	0.671	2024	tags=26%, list=15%, signal=31%
GOBP_REGULATION_OF_ACTIN_FILAMENT_LENGTH	GOBP_REGULATION_OF_ACTIN_FILAMENT_LENGTH	149	0.337691	1.62117	0.0884774	0.130582	0.671	4447	tags=48%, list=32%, signal=69%
GOBP_REGULATION_OF_URINE_VOLUME	GOBP_REGULATION_OF_URINE_VOLUME	18	0.500701	1.62114	0.0576541	0.130494	0.671	2915	tags=39%, list=21%, signal=49%
GOBP_CELLULAR_RESPONSE_TO_SALT	GOBP_CELLULAR_RESPONSE_TO_SALT	148	0.297945	1.62106	0.0942623	0.130402	0.671	3328	tags=34%, list=24%, signal=44%
GOBP_POSITIVE_REGULATION_OF_ACUTE_INFLAMMATORY_RESPONSE	GOBP_POSITIVE_REGULATION_OF_ACUTE_INFLAMMATORY_RESPONSE	18	0.670961	1.61952	0.0690335	0.131112	0.672	1481	tags=56%, list=11%, signal=62%
GOBP_CELLULAR_RESPONSE_TO_ACID_CHEMICAL	GOBP_CELLULAR_RESPONSE_TO_ACID_CHEMICAL	72	0.345429	1.61878	0.06875	0.131447	0.673	4461	tags=50%, list=32%, signal=73%
GOBP_EPITHELIAL_TUBE_BRANCHING_INVOLVED_IN_LUNG_MORPHOGENESIS	GOBP_EPITHELIAL_TUBE_BRANCHING_INVOLVED_IN_LUNG_MORPHOGENESIS	31	0.401793	1.61839	0.0623701	0.131525	0.674	2285	tags=29%, list=16%, signal=35%
GOBP_EXTRINSIC_APOPTOTIC_SIGNALING_PATHWAY	GOBP_EXTRINSIC_APOPTOTIC_SIGNALING_PATHWAY	212	0.300486	1.61791	0.0580913	0.131738	0.678	5207	tags=49%, list=37%, signal=77%
GOBP_NEGATIVE_REGULATION_OF_TYPE_I_INTERFERON_PRODUCTION	GOBP_NEGATIVE_REGULATION_OF_TYPE_I_INTERFERON_PRODUCTION	29	0.387723	1.61757	0.0689655	0.131837	0.678	2087	tags=31%, list=15%, signal=36%
GOBP_POSITIVE_REGULATION_OF_SMOOTH_MUSCLE_CONTRACTION	GOBP_POSITIVE_REGULATION_OF_SMOOTH_MUSCLE_CONTRACTION	24	0.465706	1.6172	0.0411523	0.131904	0.678	3709	tags=46%, list=27%, signal=62%
GOBP_NEGATIVE_REGULATION_OF_ENDOTHELIAL_CELL_APOPTOTIC_PROCESS	GOBP_NEGATIVE_REGULATION_OF_ENDOTHELIAL_CELL_APOPTOTIC_PROCESS	24	0.459799	1.61714	0.0939457	0.131816	0.678	1848	tags=38%, list=13%, signal=43%
GOBP_MULTI_MULTICELLULAR_ORGANISM_PROCESS	GOBP_MULTI_MULTICELLULAR_ORGANISM_PROCESS	124	0.299864	1.6168	0.0125523	0.131908	0.678	2492	tags=26%, list=18%, signal=31%
GOBP_CELL_CELL_JUNCTION_ASSEMBLY	GOBP_CELL_CELL_JUNCTION_ASSEMBLY	124	0.319566	1.61679	0.0814196	0.131796	0.678	1906	tags=25%, list=14%, signal=29%
GOBP_POSITIVE_REGULATION_OF_OXIDOREDUCTASE_ACTIVITY	GOBP_POSITIVE_REGULATION_OF_OXIDOREDUCTASE_ACTIVITY	53	0.333559	1.61648	0.0483193	0.131847	0.678	4893	tags=51%, list=35%, signal=78%
GOBP_REGULATION_OF_RESPONSE_TO_REACTIVE_OXYGEN_SPECIES	GOBP_REGULATION_OF_RESPONSE_TO_REACTIVE_OXYGEN_SPECIES	37	0.364546	1.6155	0.0691057	0.132255	0.678	3048	tags=38%, list=22%, signal=48%
GOBP_REGULATION_OF_SMALL_GTPASE_MEDIATED_SIGNAL_TRANSDUCTION	GOBP_REGULATION_OF_SMALL_GTPASE_MEDIATED_SIGNAL_TRANSDUCTION	215	0.30744	1.61377	0.174089	0.133103	0.679	3149	tags=32%, list=23%, signal=41%
GOBP_RESPONSE_TO_ORGANOPHOSPHORUS	GOBP_RESPONSE_TO_ORGANOPHOSPHORUS	78	0.344992	1.61357	0.0998004	0.133106	0.679	2163	tags=28%, list=16%, signal=33%
GOBP_EMBRYONIC_PLACENTA_MORPHOGENESIS	GOBP_EMBRYONIC_PLACENTA_MORPHOGENESIS	30	0.417578	1.6134	0.0636943	0.133081	0.68	1146	tags=20%, list=8%, signal=22%
GOBP_RESPONSE_TO_COPPER_ION	GOBP_RESPONSE_TO_COPPER_ION	20	0.415955	1.61253	0.0334646	0.133501	0.687	4893	tags=65%, list=35%, signal=100%
GOBP_POSITIVE_REGULATION_OF_REGULATORY_T_CELL_DIFFERENTIATION	GOBP_POSITIVE_REGULATION_OF_REGULATORY_T_CELL_DIFFERENTIATION	15	0.543137	1.61249	0.0583333	0.133393	0.687	2639	tags=47%, list=19%, signal=58%
GOBP_FIBROBLAST_MIGRATION	GOBP_FIBROBLAST_MIGRATION	65	0.379251	1.61241	0.0441767	0.133323	0.687	4802	tags=57%, list=34%, signal=86%
GOBP_ACTIN_POLYMERIZATION_OR_DEPOLYMERIZATION	GOBP_ACTIN_POLYMERIZATION_OR_DEPOLYMERIZATION	176	0.332944	1.61228	0.128571	0.133266	0.687	4447	tags=46%, list=32%, signal=67%
GOBP_PULMONARY_VALVE_DEVELOPMENT	GOBP_PULMONARY_VALVE_DEVELOPMENT	22	0.475304	1.61196	0.0987654	0.133314	0.687	2034	tags=36%, list=15%, signal=43%
GOBP_BIOLOGICAL_PROCESS_INVOLVED_IN_INTERACTION_WITH_HOST	GOBP_BIOLOGICAL_PROCESS_INVOLVED_IN_INTERACTION_WITH_HOST	134	0.327524	1.61177	0.0243408	0.133265	0.687	2631	tags=31%, list=19%, signal=38%
GOBP_AMYLOID_BETA_CLEARANCE	GOBP_AMYLOID_BETA_CLEARANCE	33	0.379783	1.61136	0.0487805	0.133368	0.687	3013	tags=36%, list=22%, signal=46%
GOBP_NEGATIVE_REGULATION_OF_CELL_JUNCTION_ASSEMBLY	GOBP_NEGATIVE_REGULATION_OF_CELL_JUNCTION_ASSEMBLY	29	0.429168	1.61121	0.0721649	0.133347	0.687	2786	tags=41%, list=20%, signal=52%
GOBP_ACTIN_FILAMENT_POLYMERIZATION	GOBP_ACTIN_FILAMENT_POLYMERIZATION	150	0.333346	1.61102	0.1	0.133352	0.687	4447	tags=47%, list=32%, signal=68%
GOBP_ANTIGEN_PROCESSING_AND_PRESENTATION_OF_PEPTIDE_ANTIGEN_VIA_MHC_CLASS_I	GOBP_ANTIGEN_PROCESSING_AND_PRESENTATION_OF_PEPTIDE_ANTIGEN_VIA_MHC_CLASS_I	35	0.402172	1.61087	0.0869565	0.133323	0.687	1931	tags=31%, list=14%, signal=36%
GOBP_MEMBRANE_PROTEIN_PROTEOLYSIS	GOBP_MEMBRANE_PROTEIN_PROTEOLYSIS	52	0.395972	1.61076	0.0208768	0.133254	0.687	4967	tags=60%, list=36%, signal=92%
GOBP_NEGATIVE_REGULATION_OF_SUPRAMOLECULAR_FIBER_ORGANIZATION	GOBP_NEGATIVE_REGULATION_OF_SUPRAMOLECULAR_FIBER_ORGANIZATION	164	0.295374	1.60987	0.108607	0.133707	0.694	3472	tags=37%, list=25%, signal=48%
GOBP_REGULATION_OF_HORMONE_BIOSYNTHETIC_PROCESS	GOBP_REGULATION_OF_HORMONE_BIOSYNTHETIC_PROCESS	25	0.406468	1.60943	0.0530612	0.133829	0.696	4369	tags=48%, list=31%, signal=70%
GOBP_REGULATION_OF_MACROPHAGE_DIFFERENTIATION	GOBP_REGULATION_OF_MACROPHAGE_DIFFERENTIATION	21	0.402216	1.60923	0.110429	0.133839	0.696	3581	tags=48%, list=26%, signal=64%
GOBP_REGULATION_OF_GTPASE_ACTIVITY	GOBP_REGULATION_OF_GTPASE_ACTIVITY	329	0.275782	1.60884	0.186373	0.133966	0.697	2583	tags=25%, list=19%, signal=30%
GOBP_PHYSIOLOGICAL_CARDIAC_MUSCLE_HYPERTROPHY	GOBP_PHYSIOLOGICAL_CARDIAC_MUSCLE_HYPERTROPHY	42	0.349797	1.60702	0.0515464	0.13485	0.697	1385	tags=24%, list=10%, signal=26%
GOBP_MUSCLE_ORGAN_DEVELOPMENT	GOBP_MUSCLE_ORGAN_DEVELOPMENT	306	0.278509	1.60389	0.156379	0.136567	0.704	3549	tags=35%, list=25%, signal=45%
GOBP_SIGNALING_RECEPTOR_LIGAND_PRECURSOR_PROCESSING	GOBP_SIGNALING_RECEPTOR_LIGAND_PRECURSOR_PROCESSING	24	0.387521	1.60385	0.0632411	0.136459	0.704	5054	tags=63%, list=36%, signal=98%
GOBP_NEURAL_CREST_CELL_DIFFERENTIATION	GOBP_NEURAL_CREST_CELL_DIFFERENTIATION	87	0.32493	1.60375	0.142857	0.136385	0.704	3529	tags=36%, list=25%, signal=47%
GOBP_POSITIVE_REGULATION_OF_EPITHELIAL_CELL_APOPTOTIC_PROCESS	GOBP_POSITIVE_REGULATION_OF_EPITHELIAL_CELL_APOPTOTIC_PROCESS	34	0.392694	1.60371	0.0489796	0.136281	0.704	4814	tags=56%, list=35%, signal=85%
GOBP_REACTIVE_OXYGEN_SPECIES_BIOSYNTHETIC_PROCESS	GOBP_REACTIVE_OXYGEN_SPECIES_BIOSYNTHETIC_PROCESS	49	0.392398	1.60361	0.0247934	0.136224	0.704	1960	tags=29%, list=14%, signal=33%
GOBP_NEGATIVE_REGULATION_OF_PROTEIN_BINDING	GOBP_NEGATIVE_REGULATION_OF_PROTEIN_BINDING	87	0.328817	1.60309	0.0375783	0.136375	0.704	3973	tags=41%, list=29%, signal=58%
GOBP_POSITIVE_REGULATION_OF_TRANSFERASE_ACTIVITY	GOBP_POSITIVE_REGULATION_OF_TRANSFERASE_ACTIVITY	450	0.283273	1.60275	0.0621118	0.136429	0.705	5281	tags=47%, list=38%, signal=73%
GOBP_GLUTAMATE_SECRETION	GOBP_GLUTAMATE_SECRETION	25	0.402406	1.60262	0.0590631	0.136368	0.705	3155	tags=44%, list=23%, signal=57%
GOBP_REGULATION_OF_TYPE_I_INTERFERON_MEDIATED_SIGNALING_PATHWAY	GOBP_REGULATION_OF_TYPE_I_INTERFERON_MEDIATED_SIGNALING_PATHWAY	38	0.368804	1.60196	0.0739958	0.136605	0.705	2506	tags=29%, list=18%, signal=35%
GOBP_RIBONUCLEOTIDE_CATABOLIC_PROCESS	GOBP_RIBONUCLEOTIDE_CATABOLIC_PROCESS	39	0.423963	1.60093	0.0747475	0.137064	0.705	3335	tags=49%, list=24%, signal=64%
GOBP_LONG_TERM_SYNAPTIC_POTENTIATION	GOBP_LONG_TERM_SYNAPTIC_POTENTIATION	83	0.309306	1.60012	0.0854369	0.137398	0.706	3209	tags=33%, list=23%, signal=42%
GOBP_NEGATIVE_REGULATION_OF_AXON_EXTENSION_INVOLVED_IN_AXON_GUIDANCE	GOBP_NEGATIVE_REGULATION_OF_AXON_EXTENSION_INVOLVED_IN_AXON_GUIDANCE	27	0.490084	1.60007	0.10515	0.137306	0.706	2139	tags=37%, list=15%, signal=44%
GOBP_AXON_EXTENSION	GOBP_AXON_EXTENSION	133	0.291496	1.59833	0.15	0.138088	0.709	3570	tags=34%, list=26%, signal=45%
GOBP_PURINE_CONTAINING_COMPOUND_SALVAGE	GOBP_PURINE_CONTAINING_COMPOUND_SALVAGE	22	0.508624	1.59824	0.076	0.138024	0.709	5682	tags=86%, list=41%, signal=146%
GOBP_PHENOL_CONTAINING_COMPOUND_BIOSYNTHETIC_PROCESS	GOBP_PHENOL_CONTAINING_COMPOUND_BIOSYNTHETIC_PROCESS	38	0.431746	1.59768	0.0645833	0.138193	0.71	5336	tags=61%, list=38%, signal=98%
GOBP_POSITIVE_REGULATION_OF_MAP_KINASE_ACTIVITY	GOBP_POSITIVE_REGULATION_OF_MAP_KINASE_ACTIVITY	117	0.319681	1.59709	0.161885	0.138419	0.71	4505	tags=41%, list=32%, signal=60%
GOBP_LOCOMOTORY_BEHAVIOR	GOBP_LOCOMOTORY_BEHAVIOR	186	0.277789	1.59549	0.0828157	0.139239	0.71	2634	tags=28%, list=19%, signal=35%
GOBP_REGULATION_OF_DNA_BINDING_TRANSCRIPTION_FACTOR_ACTIVITY	GOBP_REGULATION_OF_DNA_BINDING_TRANSCRIPTION_FACTOR_ACTIVITY	372	0.270559	1.59522	0.0614754	0.139267	0.71	3979	tags=36%, list=29%, signal=49%
GOBP_ICOSANOID_METABOLIC_PROCESS	GOBP_ICOSANOID_METABOLIC_PROCESS	91	0.359695	1.59392	0.0167364	0.139856	0.711	2492	tags=30%, list=18%, signal=36%
GOBP_POSITIVE_REGULATION_OF_PROTEIN_CONTAINING_COMPLEX_ASSEMBLY	GOBP_POSITIVE_REGULATION_OF_PROTEIN_CONTAINING_COMPLEX_ASSEMBLY	182	0.307128	1.59321	0.0778689	0.140125	0.713	3730	tags=37%, list=27%, signal=50%
GOBP_PROTON_TRANSMEMBRANE_TRANSPORT	GOBP_PROTON_TRANSMEMBRANE_TRANSPORT	78	0.374037	1.59238	0.0539419	0.14049	0.713	7342	tags=78%, list=53%, signal=164%
GOBP_REGULATION_OF_PROTEIN_POLYMERIZATION	GOBP_REGULATION_OF_PROTEIN_POLYMERIZATION	186	0.316487	1.59198	0.0907217	0.14058	0.713	4447	tags=45%, list=32%, signal=65%
GOBP_I_KAPPAB_PHOSPHORYLATION	GOBP_I_KAPPAB_PHOSPHORYLATION	21	0.467626	1.59106	0.0703934	0.140912	0.713	1100	tags=29%, list=8%, signal=31%
GOBP_NEGATIVE_REGULATION_OF_PROTEIN_LOCALIZATION	GOBP_NEGATIVE_REGULATION_OF_PROTEIN_LOCALIZATION	203	0.284835	1.58987	0.0165631	0.141456	0.715	6122	tags=57%, list=44%, signal=100%
GOBP_PEPTIDE_TRANSPORT	GOBP_PEPTIDE_TRANSPORT	240	0.259672	1.58985	0.0635246	0.14134	0.715	2703	tags=24%, list=19%, signal=29%
GOBP_UNSATURATED_FATTY_ACID_BIOSYNTHETIC_PROCESS	GOBP_UNSATURATED_FATTY_ACID_BIOSYNTHETIC_PROCESS	37	0.356878	1.5885	0.0484211	0.142007	0.715	2379	tags=30%, list=17%, signal=36%
GOBP_NEUROMUSCULAR_PROCESS	GOBP_NEUROMUSCULAR_PROCESS	149	0.29401	1.58814	0.160243	0.142049	0.717	2247	tags=26%, list=16%, signal=31%
GOBP_CELLULAR_RESPONSE_TO_REACTIVE_OXYGEN_SPECIES	GOBP_CELLULAR_RESPONSE_TO_REACTIVE_OXYGEN_SPECIES	126	0.329935	1.58772	0.0207039	0.142172	0.718	3554	tags=40%, list=26%, signal=53%
GOBP_POSITIVE_REGULATION_OF_BLOOD_PRESSURE	GOBP_POSITIVE_REGULATION_OF_BLOOD_PRESSURE	36	0.433773	1.58765	0.0805501	0.142071	0.718	6716	tags=75%, list=48%, signal=144%
GOBP_EPIBOLY	GOBP_EPIBOLY	33	0.409913	1.58708	0.0316456	0.1423	0.718	3052	tags=39%, list=22%, signal=50%
GOBP_FOAM_CELL_DIFFERENTIATION	GOBP_FOAM_CELL_DIFFERENTIATION	27	0.340529	1.58695	0.0349794	0.142238	0.718	3499	tags=37%, list=25%, signal=49%
GOBP_VENTRICULAR_CARDIAC_MUSCLE_CELL_DIFFERENTIATION	GOBP_VENTRICULAR_CARDIAC_MUSCLE_CELL_DIFFERENTIATION	15	0.469287	1.58644	0.0865191	0.142394	0.718	3237	tags=47%, list=23%, signal=61%
GOBP_ATRIOVENTRICULAR_VALVE_DEVELOPMENT	GOBP_ATRIOVENTRICULAR_VALVE_DEVELOPMENT	27	0.430508	1.58612	0.122407	0.14248	0.718	3263	tags=44%, list=23%, signal=58%
GOBP_NEURON_DEATH_IN_RESPONSE_TO_OXIDATIVE_STRESS	GOBP_NEURON_DEATH_IN_RESPONSE_TO_OXIDATIVE_STRESS	32	0.397072	1.58479	0.0101833	0.14314	0.72	1049	tags=22%, list=8%, signal=24%
GOBP_HEART_GROWTH	GOBP_HEART_GROWTH	103	0.312861	1.58397	0.0769231	0.1435	0.72	3050	tags=32%, list=22%, signal=41%
GOBP_REGULATION_OF_NEURON_PROJECTION_DEVELOPMENT	GOBP_REGULATION_OF_NEURON_PROJECTION_DEVELOPMENT	496	0.253551	1.58287	0.159184	0.144023	0.72	3530	tags=31%, list=25%, signal=41%
GOBP_NECROTIC_CELL_DEATH	GOBP_NECROTIC_CELL_DEATH	62	0.329507	1.58171	0.0142566	0.144603	0.721	4783	tags=52%, list=34%, signal=78%
GOBP_POSITIVE_REGULATION_OF_SYNAPTIC_TRANSMISSION	GOBP_POSITIVE_REGULATION_OF_SYNAPTIC_TRANSMISSION	138	0.303976	1.58139	0.0634921	0.144665	0.721	3209	tags=31%, list=23%, signal=40%
GOBP_PHENOL_CONTAINING_COMPOUND_METABOLIC_PROCESS	GOBP_PHENOL_CONTAINING_COMPOUND_METABOLIC_PROCESS	79	0.3646	1.58012	0.0699589	0.145271	0.721	4905	tags=49%, list=35%, signal=76%
GOBP_REGULATION_OF_FILOPODIUM_ASSEMBLY	GOBP_REGULATION_OF_FILOPODIUM_ASSEMBLY	51	0.321101	1.58005	0.106	0.145178	0.721	3764	tags=45%, list=27%, signal=62%
GOBP_INTRACELLULAR_PH_REDUCTION	GOBP_INTRACELLULAR_PH_REDUCTION	42	0.381964	1.57989	0.0803213	0.145147	0.721	6469	tags=71%, list=46%, signal=133%
GOBP_REGULATION_OF_AMINO_ACID_TRANSPORT	GOBP_REGULATION_OF_AMINO_ACID_TRANSPORT	39	0.405973	1.57832	0.046748	0.14592	0.725	4003	tags=49%, list=29%, signal=68%
GOBP_REGULATION_OF_CARDIAC_MUSCLE_CELL_ACTION_POTENTIAL	GOBP_REGULATION_OF_CARDIAC_MUSCLE_CELL_ACTION_POTENTIAL	26	0.365556	1.57776	0.0626263	0.14616	0.725	4206	tags=46%, list=30%, signal=66%
GOBP_FEEDING_BEHAVIOR	GOBP_FEEDING_BEHAVIOR	61	0.357225	1.57725	0.0265306	0.14636	0.725	1864	tags=28%, list=13%, signal=32%
GOBP_NEGATIVE_REGULATION_OF_CYTOSOLIC_CALCIUM_ION_CONCENTRATION	GOBP_NEGATIVE_REGULATION_OF_CYTOSOLIC_CALCIUM_ION_CONCENTRATION	17	0.48686	1.57627	0.0724346	0.146809	0.725	4866	tags=71%, list=35%, signal=108%
GOBP_SMALL_GTPASE_MEDIATED_SIGNAL_TRANSDUCTION	GOBP_SMALL_GTPASE_MEDIATED_SIGNAL_TRANSDUCTION	394	0.282656	1.57543	0.153527	0.147199	0.725	3742	tags=35%, list=27%, signal=46%
GOBP_REGULATION_OF_FIBROBLAST_MIGRATION	GOBP_REGULATION_OF_FIBROBLAST_MIGRATION	45	0.389202	1.57482	0.055102	0.147407	0.727	3466	tags=47%, list=25%, signal=62%
GOBP_IMPORT_INTO_CELL	GOBP_IMPORT_INTO_CELL	185	0.293099	1.5747	0.0408998	0.147352	0.727	2405	tags=25%, list=17%, signal=30%
GOBP_ORGAN_GROWTH	GOBP_ORGAN_GROWTH	179	0.297858	1.57329	0.10766	0.148024	0.731	3135	tags=31%, list=23%, signal=39%
GOBP_POSITIVE_REGULATION_OF_HORMONE_SECRETION	GOBP_POSITIVE_REGULATION_OF_HORMONE_SECRETION	137	0.269363	1.57228	0.0791075	0.148462	0.731	3398	tags=31%, list=24%, signal=41%
GOBP_NEGATIVE_REGULATION_OF_CALCIUM_ION_TRANSMEMBRANE_TRANSPORT	GOBP_NEGATIVE_REGULATION_OF_CALCIUM_ION_TRANSMEMBRANE_TRANSPORT	45	0.3683	1.57141	0.0873984	0.148848	0.732	4234	tags=51%, list=30%, signal=73%
GOBP_INOSITOL_PHOSPHATE_BIOSYNTHETIC_PROCESS	GOBP_INOSITOL_PHOSPHATE_BIOSYNTHETIC_PROCESS	26	0.38501	1.57102	0.0699589	0.148917	0.732	1378	tags=23%, list=10%, signal=26%
GOBP_CGMP_MEDIATED_SIGNALING	GOBP_CGMP_MEDIATED_SIGNALING	25	0.533794	1.57087	0.115308	0.148855	0.732	2081	tags=44%, list=15%, signal=52%
GOBP_PLACENTA_DEVELOPMENT	GOBP_PLACENTA_DEVELOPMENT	147	0.277027	1.57046	0.164969	0.148984	0.732	3530	tags=31%, list=25%, signal=41%
GOBP_RETINA_VASCULATURE_DEVELOPMENT_IN_CAMERA_TYPE_EYE	GOBP_RETINA_VASCULATURE_DEVELOPMENT_IN_CAMERA_TYPE_EYE	20	0.484255	1.57018	0.118577	0.149042	0.732	4486	tags=70%, list=32%, signal=103%
GOBP_REGULATION_OF_GLYCOPROTEIN_METABOLIC_PROCESS	GOBP_REGULATION_OF_GLYCOPROTEIN_METABOLIC_PROCESS	42	0.358751	1.57008	0.046748	0.148951	0.732	5330	tags=57%, list=38%, signal=92%
GOBP_T_HELPER_1_CELL_DIFFERENTIATION	GOBP_T_HELPER_1_CELL_DIFFERENTIATION	20	0.435164	1.57008	0.0670732	0.148822	0.732	3010	tags=45%, list=22%, signal=57%
GOBP_LIPOSACCHARIDE_METABOLIC_PROCESS	GOBP_LIPOSACCHARIDE_METABOLIC_PROCESS	87	0.36166	1.56867	0.0456432	0.149455	0.735	3722	tags=45%, list=27%, signal=61%
GOBP_CELL_DEATH_IN_RESPONSE_TO_HYDROGEN_PEROXIDE	GOBP_CELL_DEATH_IN_RESPONSE_TO_HYDROGEN_PEROXIDE	33	0.350725	1.56853	0.0523139	0.149421	0.735	6863	tags=73%, list=49%, signal=143%
GOBP_INTRACELLULAR_IRON_ION_HOMEOSTASIS	GOBP_INTRACELLULAR_IRON_ION_HOMEOSTASIS	55	0.369841	1.56767	0.0566802	0.149862	0.736	5971	tags=64%, list=43%, signal=111%
GOBP_CELLULAR_RESPONSE_TO_HYDROGEN_PEROXIDE	GOBP_CELLULAR_RESPONSE_TO_HYDROGEN_PEROXIDE	83	0.322821	1.56748	0.0286885	0.149826	0.736	3554	tags=40%, list=26%, signal=53%
GOBP_DETECTION_OF_CHEMICAL_STIMULUS	GOBP_DETECTION_OF_CHEMICAL_STIMULUS	32	0.497765	1.5672	0.0996094	0.149887	0.736	1845	tags=44%, list=13%, signal=50%
GOBP_MYELOID_CELL_HOMEOSTASIS	GOBP_MYELOID_CELL_HOMEOSTASIS	187	0.315493	1.56704	0.0167364	0.149849	0.736	4632	tags=44%, list=33%, signal=65%
GOBP_NATURAL_KILLER_CELL_DIFFERENTIATION	GOBP_NATURAL_KILLER_CELL_DIFFERENTIATION	30	0.36153	1.56658	0.0826772	0.15	0.736	2639	tags=30%, list=19%, signal=37%
GOBP_REGULATION_OF_DNA_BINDING	GOBP_REGULATION_OF_DNA_BINDING	120	0.286198	1.56548	0.161826	0.150552	0.739	3463	tags=33%, list=25%, signal=43%
GOBP_PEPTIDYL_TYROSINE_DEPHOSPHORYLATION	GOBP_PEPTIDYL_TYROSINE_DEPHOSPHORYLATION	28	0.4241	1.5652	0.115063	0.150579	0.739	2376	tags=32%, list=17%, signal=39%
GOBP_HEMATOPOIETIC_OR_LYMPHOID_ORGAN_DEVELOPMENT	GOBP_HEMATOPOIETIC_OR_LYMPHOID_ORGAN_DEVELOPMENT	99	0.293693	1.56516	0.162602	0.150465	0.739	2367	tags=23%, list=17%, signal=28%
GOBP_REGULATION_OF_MONOOXYGENASE_ACTIVITY	GOBP_REGULATION_OF_MONOOXYGENASE_ACTIVITY	39	0.322105	1.56497	0.0785124	0.150452	0.739	1845	tags=26%, list=13%, signal=29%
GOBP_REGULATION_OF_SIGNALING_RECEPTOR_ACTIVITY	GOBP_REGULATION_OF_SIGNALING_RECEPTOR_ACTIVITY	106	0.275598	1.56495	0.0512295	0.150345	0.739	3119	tags=32%, list=22%, signal=41%
GOBP_REGULATION_OF_RECEPTOR_CLUSTERING	GOBP_REGULATION_OF_RECEPTOR_CLUSTERING	22	0.424888	1.56477	0.127835	0.15032	0.739	2545	tags=41%, list=18%, signal=50%
GOBP_PLATELET_DERIVED_GROWTH_FACTOR_RECEPTOR_SIGNALING_PATHWAY	GOBP_PLATELET_DERIVED_GROWTH_FACTOR_RECEPTOR_SIGNALING_PATHWAY	62	0.359839	1.56465	0.0997963	0.150244	0.74	3482	tags=39%, list=25%, signal=51%
GOBP_MULTICELLULAR_ORGANISMAL_LEVEL_CHEMICAL_HOMEOSTASIS	GOBP_MULTICELLULAR_ORGANISMAL_LEVEL_CHEMICAL_HOMEOSTASIS	59	0.355749	1.56412	0.102725	0.150428	0.745	2915	tags=34%, list=21%, signal=43%
GOBP_CELL_FATE_COMMITMENT	GOBP_CELL_FATE_COMMITMENT	198	0.293061	1.56389	0.22449	0.150441	0.745	2401	tags=22%, list=17%, signal=26%
GOBP_OSTEOBLAST_PROLIFERATION	GOBP_OSTEOBLAST_PROLIFERATION	34	0.406079	1.56383	0.134969	0.150349	0.745	1912	tags=26%, list=14%, signal=31%
GOBP_REGULATION_OF_EXTRINSIC_APOPTOTIC_SIGNALING_PATHWAY	GOBP_REGULATION_OF_EXTRINSIC_APOPTOTIC_SIGNALING_PATHWAY	149	0.291302	1.56379	0.0956341	0.150255	0.745	4124	tags=40%, list=30%, signal=56%
GOBP_REGULATION_OF_SPROUTING_ANGIOGENESIS	GOBP_REGULATION_OF_SPROUTING_ANGIOGENESIS	36	0.398483	1.56348	0.130802	0.15034	0.745	2050	tags=33%, list=15%, signal=39%
GOBP_POSITIVE_REGULATION_OF_LIPID_KINASE_ACTIVITY	GOBP_POSITIVE_REGULATION_OF_LIPID_KINASE_ACTIVITY	30	0.399721	1.56334	0.156701	0.150295	0.746	3282	tags=43%, list=24%, signal=57%
GOBP_POSITIVE_REGULATION_OF_FILOPODIUM_ASSEMBLY	GOBP_POSITIVE_REGULATION_OF_FILOPODIUM_ASSEMBLY	31	0.371321	1.5615	0.0691057	0.151294	0.748	3169	tags=48%, list=23%, signal=62%
GOBP_POSITIVE_REGULATION_OF_ACTIVATED_T_CELL_PROLIFERATION	GOBP_POSITIVE_REGULATION_OF_ACTIVATED_T_CELL_PROLIFERATION	19	0.382038	1.5608	0.0504032	0.151588	0.748	2581	tags=37%, list=19%, signal=45%
GOBP_MEMBRANE_RAFT_ORGANIZATION	GOBP_MEMBRANE_RAFT_ORGANIZATION	21	0.504538	1.55972	0.040404	0.152171	0.748	3462	tags=62%, list=25%, signal=82%
GOBP_POSITIVE_REGULATION_OF_LAMELLIPODIUM_ORGANIZATION	GOBP_POSITIVE_REGULATION_OF_LAMELLIPODIUM_ORGANIZATION	32	0.439343	1.55971	0.0271399	0.152043	0.748	3489	tags=53%, list=25%, signal=71%
GOBP_CD4_POSITIVE_ALPHA_BETA_T_CELL_CYTOKINE_PRODUCTION	GOBP_CD4_POSITIVE_ALPHA_BETA_T_CELL_CYTOKINE_PRODUCTION	18	0.443137	1.55932	0.0601942	0.1522	0.748	2780	tags=44%, list=20%, signal=55%
GOBP_ACTIVATION_OF_PROTEIN_KINASE_ACTIVITY	GOBP_ACTIVATION_OF_PROTEIN_KINASE_ACTIVITY	83	0.329406	1.55909	0.0804124	0.152208	0.748	5550	tags=51%, list=40%, signal=84%
GOBP_ACTIN_FILAMENT_BASED_MOVEMENT	GOBP_ACTIN_FILAMENT_BASED_MOVEMENT	112	0.31649	1.55884	0.116564	0.15223	0.75	3165	tags=34%, list=23%, signal=44%
GOBP_FIBROBLAST_PROLIFERATION	GOBP_FIBROBLAST_PROLIFERATION	133	0.300217	1.55872	0.144654	0.152165	0.75	4024	tags=38%, list=29%, signal=53%
GOBP_PROTEIN_HOMOOLIGOMERIZATION	GOBP_PROTEIN_HOMOOLIGOMERIZATION	144	0.257741	1.55858	0.0499002	0.152135	0.752	5270	tags=47%, list=38%, signal=74%
GOBP_RAS_PROTEIN_SIGNAL_TRANSDUCTION	GOBP_RAS_PROTEIN_SIGNAL_TRANSDUCTION	309	0.281222	1.55649	0.151139	0.153281	0.758	4533	tags=40%, list=33%, signal=58%
GOBP_IMPORT_ACROSS_PLASMA_MEMBRANE	GOBP_IMPORT_ACROSS_PLASMA_MEMBRANE	149	0.28948	1.55648	0.0576132	0.15316	0.758	5794	tags=50%, list=42%, signal=85%
GOBP_TRANSITION_METAL_ION_TRANSPORT	GOBP_TRANSITION_METAL_ION_TRANSPORT	78	0.338258	1.55592	0.0489362	0.153315	0.758	6256	tags=63%, list=45%, signal=113%
GOBP_DOPAMINE_SECRETION	GOBP_DOPAMINE_SECRETION	25	0.496463	1.55579	0.0879346	0.15328	0.759	3209	tags=52%, list=23%, signal=67%
GOBP_POSITIVE_REGULATION_OF_CYCLASE_ACTIVITY	GOBP_POSITIVE_REGULATION_OF_CYCLASE_ACTIVITY	25	0.399396	1.55507	0.0578842	0.153619	0.761	2537	tags=36%, list=18%, signal=44%
GOBP_POSITIVE_REGULATION_OF_LYASE_ACTIVITY	GOBP_POSITIVE_REGULATION_OF_LYASE_ACTIVITY	25	0.403228	1.55479	0.0738523	0.153683	0.761	2537	tags=36%, list=18%, signal=44%
GOBP_POSITIVE_REGULATION_OF_INTRINSIC_APOPTOTIC_SIGNALING_PATHWAY	GOBP_POSITIVE_REGULATION_OF_INTRINSIC_APOPTOTIC_SIGNALING_PATHWAY	66	0.36657	1.55415	0.0314465	0.153938	0.762	6309	tags=67%, list=45%, signal=121%
GOBP_PULMONARY_VALVE_MORPHOGENESIS	GOBP_PULMONARY_VALVE_MORPHOGENESIS	18	0.511964	1.55256	0.093361	0.154855	0.769	2034	tags=39%, list=15%, signal=45%
GOBP_REGULATION_OF_CALCIUM_ION_IMPORT	GOBP_REGULATION_OF_CALCIUM_ION_IMPORT	27	0.398312	1.55238	0.104723	0.154832	0.769	2147	tags=33%, list=15%, signal=39%
GOBP_REGULATION_OF_NEURON_PROJECTION_REGENERATION	GOBP_REGULATION_OF_NEURON_PROJECTION_REGENERATION	37	0.363469	1.55106	0.117647	0.155506	0.771	2085	tags=32%, list=15%, signal=38%
GOBP_CELLULAR_RESPONSE_TO_METAL_ION	GOBP_CELLULAR_RESPONSE_TO_METAL_ION	132	0.282718	1.55103	0.0729167	0.155411	0.771	3750	tags=38%, list=27%, signal=51%
GOBP_POSITIVE_REGULATION_OF_PATHWAY_RESTRICTED_SMAD_PROTEIN_PHOSPHORYLATION	GOBP_POSITIVE_REGULATION_OF_PATHWAY_RESTRICTED_SMAD_PROTEIN_PHOSPHORYLATION	36	0.335043	1.55067	0.0855397	0.155469	0.771	2670	tags=33%, list=19%, signal=41%
GOBP_REGULATION_OF_EXTENT_OF_CELL_GROWTH	GOBP_REGULATION_OF_EXTENT_OF_CELL_GROWTH	118	0.288365	1.55037	0.202869	0.155497	0.771	2139	tags=24%, list=15%, signal=28%
GOBP_VASCULAR_WOUND_HEALING	GOBP_VASCULAR_WOUND_HEALING	17	0.472939	1.55027	0.102725	0.155429	0.771	1249	tags=29%, list=9%, signal=32%
GOBP_NEGATIVE_REGULATION_OF_CELL_SUBSTRATE_JUNCTION_ORGANIZATION	GOBP_NEGATIVE_REGULATION_OF_CELL_SUBSTRATE_JUNCTION_ORGANIZATION	17	0.470004	1.54973	0.0794297	0.155614	0.772	2476	tags=47%, list=18%, signal=57%
GOBP_AUDITORY_RECEPTOR_CELL_DEVELOPMENT	GOBP_AUDITORY_RECEPTOR_CELL_DEVELOPMENT	19	0.368015	1.54923	0.0684647	0.15585	0.772	4216	tags=47%, list=30%, signal=68%
GOBP_POSITIVE_REGULATION_OF_PROTEIN_LOCALIZATION_TO_MEMBRANE	GOBP_POSITIVE_REGULATION_OF_PROTEIN_LOCALIZATION_TO_MEMBRANE	100	0.313155	1.5489	0.0619835	0.155908	0.772	6470	tags=60%, list=46%, signal=111%
GOBP_ANIMAL_ORGAN_REGENERATION	GOBP_ANIMAL_ORGAN_REGENERATION	21	0.450851	1.54813	0.127835	0.156233	0.772	1988	tags=38%, list=14%, signal=44%
GOBP_POSITIVE_REGULATION_OF_VASCULAR_ASSOCIATED_SMOOTH_MUSCLE_CELL_PROLIFERATION	GOBP_POSITIVE_REGULATION_OF_VASCULAR_ASSOCIATED_SMOOTH_MUSCLE_CELL_PROLIFERATION	39	0.362714	1.54809	0.135246	0.156125	0.772	7171	tags=77%, list=51%, signal=158%
GOBP_NEURON_PROJECTION_EXTENSION_INVOLVED_IN_NEURON_PROJECTION_GUIDANCE	GOBP_NEURON_PROJECTION_EXTENSION_INVOLVED_IN_NEURON_PROJECTION_GUIDANCE	36	0.42639	1.54771	0.167024	0.156206	0.772	2531	tags=36%, list=18%, signal=44%
GOBP_POSITIVE_REGULATION_OF_CELL_SUBSTRATE_JUNCTION_ORGANIZATION	GOBP_POSITIVE_REGULATION_OF_CELL_SUBSTRATE_JUNCTION_ORGANIZATION	34	0.411993	1.54752	0.0560166	0.156197	0.772	3298	tags=47%, list=24%, signal=62%
GOBP_NEGATIVE_REGULATION_OF_MEMBRANE_POTENTIAL	GOBP_NEGATIVE_REGULATION_OF_MEMBRANE_POTENTIAL	15	0.451091	1.54683	0.0207039	0.15652	0.772	4470	tags=60%, list=32%, signal=88%
GOBP_REGULATION_OF_STEROID_BIOSYNTHETIC_PROCESS	GOBP_REGULATION_OF_STEROID_BIOSYNTHETIC_PROCESS	62	0.359573	1.54674	0.00630252	0.156447	0.772	2764	tags=34%, list=20%, signal=42%
GOBP_NEGATIVE_REGULATION_OF_NEURON_APOPTOTIC_PROCESS	GOBP_NEGATIVE_REGULATION_OF_NEURON_APOPTOTIC_PROCESS	170	0.261553	1.54652	0.091858	0.156443	0.772	2858	tags=29%, list=21%, signal=36%
GOBP_POSITIVE_REGULATION_OF_VASCULAR_ASSOCIATED_SMOOTH_MUSCLE_CELL_MIGRATION	GOBP_POSITIVE_REGULATION_OF_VASCULAR_ASSOCIATED_SMOOTH_MUSCLE_CELL_MIGRATION	19	0.454347	1.54613	0.133874	0.15656	0.772	4893	tags=68%, list=35%, signal=105%
GOBP_VENTRICULAR_CARDIAC_MUSCLE_CELL_ACTION_POTENTIAL	GOBP_VENTRICULAR_CARDIAC_MUSCLE_CELL_ACTION_POTENTIAL	26	0.412901	1.54582	0.103175	0.156622	0.772	4206	tags=54%, list=30%, signal=77%
GOBP_POTASSIUM_ION_TRANSMEMBRANE_TRANSPORT	GOBP_POTASSIUM_ION_TRANSMEMBRANE_TRANSPORT	134	0.309681	1.54509	0.0596421	0.156902	0.773	3527	tags=37%, list=25%, signal=48%
GOBP_POSITIVE_REGULATION_OF_EXTRACELLULAR_MATRIX_ORGANIZATION	GOBP_POSITIVE_REGULATION_OF_EXTRACELLULAR_MATRIX_ORGANIZATION	26	0.432974	1.54491	0.092437	0.156878	0.773	4972	tags=62%, list=36%, signal=96%
GOBP_TYPE_II_INTERFERON_MEDIATED_SIGNALING_PATHWAY	GOBP_TYPE_II_INTERFERON_MEDIATED_SIGNALING_PATHWAY	22	0.442811	1.54489	0.0959184	0.15682	0.773	3862	tags=55%, list=28%, signal=75%
GOBP_INORGANIC_ION_IMPORT_ACROSS_PLASMA_MEMBRANE	GOBP_INORGANIC_ION_IMPORT_ACROSS_PLASMA_MEMBRANE	84	0.317511	1.54458	0.0590551	0.156914	0.773	1995	tags=25%, list=14%, signal=29%
GOBP_VASCULAR_ASSOCIATED_SMOOTH_MUSCLE_CELL_DIFFERENTIATION	GOBP_VASCULAR_ASSOCIATED_SMOOTH_MUSCLE_CELL_DIFFERENTIATION	38	0.40583	1.54413	0.171843	0.157069	0.773	3643	tags=42%, list=26%, signal=57%
GOBP_C21_STEROID_HORMONE_METABOLIC_PROCESS	GOBP_C21_STEROID_HORMONE_METABOLIC_PROCESS	28	0.455179	1.5433	0.0540541	0.157412	0.773	3594	tags=39%, list=26%, signal=53%
GOBP_REGULATION_OF_T_CELL_APOPTOTIC_PROCESS	GOBP_REGULATION_OF_T_CELL_APOPTOTIC_PROCESS	43	0.381437	1.54307	0.108787	0.157386	0.773	4074	tags=42%, list=29%, signal=59%
GOBP_PERIPHERAL_NERVOUS_SYSTEM_DEVELOPMENT	GOBP_PERIPHERAL_NERVOUS_SYSTEM_DEVELOPMENT	67	0.305481	1.54267	0.115226	0.157539	0.773	3609	tags=39%, list=26%, signal=52%
GOBP_MATERNAL_PLACENTA_DEVELOPMENT	GOBP_MATERNAL_PLACENTA_DEVELOPMENT	30	0.334283	1.54217	0.0188285	0.15772	0.775	3883	tags=43%, list=28%, signal=60%
GOBP_BODY_FLUID_SECRETION	GOBP_BODY_FLUID_SECRETION	70	0.324512	1.54188	0.0187891	0.157759	0.775	4174	tags=40%, list=30%, signal=57%
GOBP_POSITIVE_REGULATION_OF_MITOCHONDRION_ORGANIZATION	GOBP_POSITIVE_REGULATION_OF_MITOCHONDRION_ORGANIZATION	72	0.356338	1.54168	0.0144628	0.157759	0.775	6425	tags=68%, list=46%, signal=126%
GOBP_POSITIVE_REGULATION_OF_STRIATED_MUSCLE_CELL_DIFFERENTIATION	GOBP_POSITIVE_REGULATION_OF_STRIATED_MUSCLE_CELL_DIFFERENTIATION	49	0.340335	1.5408	0.121399	0.158167	0.775	3151	tags=35%, list=23%, signal=45%
GOBP_GLUTAMINE_FAMILY_AMINO_ACID_CATABOLIC_PROCESS	GOBP_GLUTAMINE_FAMILY_AMINO_ACID_CATABOLIC_PROCESS	20	0.407904	1.54062	0.0567951	0.158149	0.775	5071	tags=60%, list=36%, signal=94%
GOBP_POSITIVE_REGULATION_OF_ENDOCYTOSIS	GOBP_POSITIVE_REGULATION_OF_ENDOCYTOSIS	113	0.339489	1.54023	0.0587002	0.158239	0.775	3267	tags=39%, list=23%, signal=50%
GOBP_INTRACELLULAR_ZINC_ION_HOMEOSTASIS	GOBP_INTRACELLULAR_ZINC_ION_HOMEOSTASIS	25	0.350291	1.54014	0.0769231	0.158169	0.775	8077	tags=80%, list=58%, signal=190%
GOBP_OSSIFICATION	GOBP_OSSIFICATION	344	0.274282	1.53902	0.188525	0.158717	0.777	1480	tags=18%, list=11%, signal=20%
GOBP_EXCRETION	GOBP_EXCRETION	37	0.435417	1.53851	0.0769231	0.158929	0.777	2200	tags=35%, list=16%, signal=42%
GOBP_VIRAL_PROCESS	GOBP_VIRAL_PROCESS	290	0.299497	1.53837	0.0352697	0.158859	0.777	6835	tags=62%, list=49%, signal=119%
GOBP_NEGATIVE_REGULATION_OF_AXONOGENESIS	GOBP_NEGATIVE_REGULATION_OF_AXONOGENESIS	68	0.327032	1.53823	0.147059	0.158818	0.778	2139	tags=26%, list=15%, signal=31%
GOBP_NEURON_DEATH	GOBP_NEURON_DEATH	386	0.262543	1.53731	0.0623701	0.159251	0.779	2546	tags=26%, list=18%, signal=31%
GOBP_DIGESTIVE_SYSTEM_DEVELOPMENT	GOBP_DIGESTIVE_SYSTEM_DEVELOPMENT	102	0.339223	1.53696	0.148707	0.159332	0.779	1366	tags=19%, list=10%, signal=21%
GOBP_ENERGY_HOMEOSTASIS	GOBP_ENERGY_HOMEOSTASIS	41	0.336381	1.53685	0.0540541	0.159263	0.779	5381	tags=56%, list=39%, signal=91%
GOBP_REGULATION_OF_T_HELPER_CELL_DIFFERENTIATION	GOBP_REGULATION_OF_T_HELPER_CELL_DIFFERENTIATION	25	0.42479	1.53661	0.120163	0.159277	0.779	3010	tags=36%, list=22%, signal=46%
GOBP_CELLULAR_RESPONSE_TO_MECHANICAL_STIMULUS	GOBP_CELLULAR_RESPONSE_TO_MECHANICAL_STIMULUS	33	0.366997	1.53641	0.130785	0.159284	0.779	4949	tags=58%, list=36%, signal=89%
GOBP_POSITIVE_REGULATION_OF_CELL_PROJECTION_ORGANIZATION	GOBP_POSITIVE_REGULATION_OF_CELL_PROJECTION_ORGANIZATION	402	0.253034	1.5362	0.17284	0.159255	0.779	3790	tags=34%, list=27%, signal=45%
GOBP_NEGATIVE_REGULATION_OF_STEROID_METABOLIC_PROCESS	GOBP_NEGATIVE_REGULATION_OF_STEROID_METABOLIC_PROCESS	20	0.388326	1.53585	0.0596421	0.159351	0.779	1987	tags=25%, list=14%, signal=29%
GOBP_REGULATION_OF_MORPHOGENESIS_OF_AN_EPITHELIUM	GOBP_REGULATION_OF_MORPHOGENESIS_OF_AN_EPITHELIUM	63	0.344881	1.53567	0.136735	0.159329	0.782	1988	tags=27%, list=14%, signal=31%
GOBP_REGULATION_OF_MAP_KINASE_ACTIVITY	GOBP_REGULATION_OF_MAP_KINASE_ACTIVITY	182	0.29784	1.53431	0.122661	0.16009	0.782	3155	tags=29%, list=23%, signal=37%
GOBP_POSITIVE_REGULATION_OF_SYNAPTIC_TRANSMISSION_GLUTAMATERGIC	GOBP_POSITIVE_REGULATION_OF_SYNAPTIC_TRANSMISSION_GLUTAMATERGIC	25	0.494089	1.53413	0.128906	0.160058	0.782	3155	tags=44%, list=23%, signal=57%
GOBP_REGULATION_OF_MACROPHAGE_DERIVED_FOAM_CELL_DIFFERENTIATION	GOBP_REGULATION_OF_MACROPHAGE_DERIVED_FOAM_CELL_DIFFERENTIATION	21	0.378944	1.53395	0.0759754	0.160061	0.787	3013	tags=38%, list=22%, signal=49%
GOBP_SIGNAL_TRANSDUCTION_IN_ABSENCE_OF_LIGAND	GOBP_SIGNAL_TRANSDUCTION_IN_ABSENCE_OF_LIGAND	70	0.29715	1.53305	0.0850622	0.160494	0.788	4822	tags=44%, list=35%, signal=67%
GOBP_ADULT_BEHAVIOR	GOBP_ADULT_BEHAVIOR	129	0.267797	1.53292	0.0612245	0.160448	0.788	2627	tags=26%, list=19%, signal=32%
GOBP_NEGATIVE_REGULATION_OF_CELL_GROWTH	GOBP_NEGATIVE_REGULATION_OF_CELL_GROWTH	185	0.265492	1.5327	0.147303	0.160447	0.788	3463	tags=29%, list=25%, signal=38%
GOBP_ACROSOME_REACTION	GOBP_ACROSOME_REACTION	20	0.481199	1.53267	0.0393701	0.160337	0.788	2919	tags=40%, list=21%, signal=51%
GOBP_FILOPODIUM_ASSEMBLY	GOBP_FILOPODIUM_ASSEMBLY	68	0.315294	1.53256	0.183505	0.160302	0.788	3764	tags=41%, list=27%, signal=56%
GOBP_POSITIVE_REGULATION_OF_ACTIN_FILAMENT_POLYMERIZATION	GOBP_POSITIVE_REGULATION_OF_ACTIN_FILAMENT_POLYMERIZATION	46	0.353489	1.5324	0.0698152	0.160293	0.789	4667	tags=52%, list=33%, signal=78%
GOBP_DETECTION_OF_MECHANICAL_STIMULUS	GOBP_DETECTION_OF_MECHANICAL_STIMULUS	39	0.382513	1.5308	0.0787402	0.161119	0.789	2437	tags=36%, list=17%, signal=43%
GOBP_REGULATION_OF_LONG_TERM_SYNAPTIC_DEPRESSION	GOBP_REGULATION_OF_LONG_TERM_SYNAPTIC_DEPRESSION	15	0.469623	1.53054	0.109959	0.161127	0.789	1751	tags=40%, list=13%, signal=46%
GOBP_RENAL_ABSORPTION	GOBP_RENAL_ABSORPTION	22	0.449039	1.53032	0.125	0.16111	0.789	1939	tags=32%, list=14%, signal=37%
GOBP_NEGATIVE_REGULATION_OF_VASCULAR_ASSOCIATED_SMOOTH_MUSCLE_CELL_PROLIFERATION	GOBP_NEGATIVE_REGULATION_OF_VASCULAR_ASSOCIATED_SMOOTH_MUSCLE_CELL_PROLIFERATION	32	0.410336	1.52957	0.0661323	0.161372	0.789	7332	tags=88%, list=53%, signal=184%
GOBP_REGULATION_OF_POTASSIUM_ION_TRANSMEMBRANE_TRANSPORTER_ACTIVITY	GOBP_REGULATION_OF_POTASSIUM_ION_TRANSMEMBRANE_TRANSPORTER_ACTIVITY	51	0.318424	1.52909	0.0856574	0.161543	0.79	3369	tags=35%, list=24%, signal=46%
GOBP_REGULATION_OF_ACTION_POTENTIAL	GOBP_REGULATION_OF_ACTION_POTENTIAL	55	0.307372	1.52906	0.0828516	0.161434	0.79	3094	tags=35%, list=22%, signal=44%
GOBP_ENDODERMAL_CELL_DIFFERENTIATION	GOBP_ENDODERMAL_CELL_DIFFERENTIATION	22	0.431845	1.52884	0.127083	0.161455	0.79	1617	tags=32%, list=12%, signal=36%
GOBP_BIOLOGICAL_PROCESS_INVOLVED_IN_SYMBIOTIC_INTERACTION	GOBP_BIOLOGICAL_PROCESS_INVOLVED_IN_SYMBIOTIC_INTERACTION	209	0.303609	1.52851	0.0205761	0.161519	0.79	6827	tags=62%, list=49%, signal=120%
GOBP_LYMPHOCYTE_APOPTOTIC_PROCESS	GOBP_LYMPHOCYTE_APOPTOTIC_PROCESS	81	0.324995	1.52822	0.116525	0.161558	0.792	4816	tags=46%, list=35%, signal=69%
GOBP_BRANCHING_INVOLVED_IN_BLOOD_VESSEL_MORPHOGENESIS	GOBP_BRANCHING_INVOLVED_IN_BLOOD_VESSEL_MORPHOGENESIS	39	0.398096	1.52804	0.176221	0.161534	0.792	2427	tags=33%, list=17%, signal=40%
GOBP_FIBROBLAST_ACTIVATION	GOBP_FIBROBLAST_ACTIVATION	19	0.416177	1.52784	0.0922432	0.161495	0.792	5712	tags=68%, list=41%, signal=116%
GOBP_REGULATION_OF_MEMBRANE_POTENTIAL	GOBP_REGULATION_OF_MEMBRANE_POTENTIAL	336	0.257534	1.52747	0.0961924	0.161558	0.792	3517	tags=33%, list=25%, signal=43%
GOBP_IMMUNE_RESPONSE_TO_TUMOR_CELL	GOBP_IMMUNE_RESPONSE_TO_TUMOR_CELL	20	0.42334	1.52741	0.0642023	0.161487	0.792	1988	tags=35%, list=14%, signal=41%
GOBP_EPITHELIAL_TO_MESENCHYMAL_TRANSITION	GOBP_EPITHELIAL_TO_MESENCHYMAL_TRANSITION	147	0.296964	1.52664	0.158763	0.161856	0.792	4101	tags=37%, list=29%, signal=52%
GOBP_NEGATIVE_REGULATION_OF_LIPID_CATABOLIC_PROCESS	GOBP_NEGATIVE_REGULATION_OF_LIPID_CATABOLIC_PROCESS	24	0.413576	1.52662	0.0910973	0.161739	0.792	3412	tags=46%, list=24%, signal=61%
GOBP_TRANSCYTOSIS	GOBP_TRANSCYTOSIS	17	0.431114	1.52625	0.0407332	0.16184	0.792	5126	tags=65%, list=37%, signal=102%
GOBP_ASSOCIATIVE_LEARNING	GOBP_ASSOCIATIVE_LEARNING	76	0.319159	1.52616	0.13442	0.16176	0.792	4969	tags=50%, list=36%, signal=77%
GOBP_RESPONSE_TO_SALT	GOBP_RESPONSE_TO_SALT	246	0.249025	1.52589	0.129098	0.161753	0.793	3429	tags=32%, list=25%, signal=41%
GOBP_CELL_CELL_ADHESION_VIA_PLASMA_MEMBRANE_ADHESION_MOLECULES	GOBP_CELL_CELL_ADHESION_VIA_PLASMA_MEMBRANE_ADHESION_MOLECULES	149	0.335659	1.52569	0.126819	0.161734	0.793	2272	tags=28%, list=16%, signal=33%
GOBP_NUCLEOSIDE_PHOSPHATE_CATABOLIC_PROCESS	GOBP_NUCLEOSIDE_PHOSPHATE_CATABOLIC_PROCESS	66	0.354769	1.52564	0.104628	0.161632	0.793	3042	tags=38%, list=22%, signal=48%
GOBP_LONG_TERM_SYNAPTIC_DEPRESSION	GOBP_LONG_TERM_SYNAPTIC_DEPRESSION	27	0.36477	1.52511	0.157464	0.161832	0.793	1751	tags=30%, list=13%, signal=34%
GOBP_REGULATION_OF_GLIAL_CELL_PROLIFERATION	GOBP_REGULATION_OF_GLIAL_CELL_PROLIFERATION	46	0.307765	1.52486	0.129979	0.161843	0.793	1823	tags=24%, list=13%, signal=27%
GOBP_REGULATION_OF_TRANSMEMBRANE_RECEPTOR_PROTEIN_SERINE_THREONINE_KINASE_SIGNALING_PATHWAY	GOBP_REGULATION_OF_TRANSMEMBRANE_RECEPTOR_PROTEIN_SERINE_THREONINE_KINASE_SIGNALING_PATHWAY	224	0.265451	1.52471	0.134328	0.161792	0.793	2838	tags=27%, list=20%, signal=34%
GOBP_REGULATION_OF_ENDOTHELIAL_CELL_CHEMOTAXIS	GOBP_REGULATION_OF_ENDOTHELIAL_CELL_CHEMOTAXIS	19	0.469995	1.52441	0.11588	0.161847	0.793	2523	tags=42%, list=18%, signal=51%
GOBP_ARGININE_METABOLIC_PROCESS	GOBP_ARGININE_METABOLIC_PROCESS	16	0.449666	1.52437	0.0609756	0.161731	0.793	5009	tags=63%, list=36%, signal=97%
GOBP_NEGATIVE_REGULATION_OF_CELL_PROJECTION_ORGANIZATION	GOBP_NEGATIVE_REGULATION_OF_CELL_PROJECTION_ORGANIZATION	196	0.271461	1.52419	0.163599	0.161706	0.793	3155	tags=30%, list=23%, signal=38%
GOBP_CARBOHYDRATE_HOMEOSTASIS	GOBP_CARBOHYDRATE_HOMEOSTASIS	219	0.262237	1.52405	0.0371901	0.16165	0.794	7088	tags=60%, list=51%, signal=120%
GOBP_RESPONSE_TO_REACTIVE_OXYGEN_SPECIES	GOBP_RESPONSE_TO_REACTIVE_OXYGEN_SPECIES	167	0.305978	1.52304	0.04158	0.162154	0.794	7381	tags=71%, list=53%, signal=150%
GOBP_REGULATION_OF_MYOBLAST_DIFFERENTIATION	GOBP_REGULATION_OF_MYOBLAST_DIFFERENTIATION	79	0.308094	1.52298	0.108607	0.162058	0.794	4113	tags=39%, list=30%, signal=55%
GOBP_POSITIVE_REGULATION_OF_GTPASE_ACTIVITY	GOBP_POSITIVE_REGULATION_OF_GTPASE_ACTIVITY	238	0.263252	1.52295	0.222904	0.161966	0.796	2812	tags=25%, list=20%, signal=31%
GOBP_DOPAMINE_TRANSPORT	GOBP_DOPAMINE_TRANSPORT	33	0.421661	1.52287	0.100402	0.161885	0.796	3482	tags=45%, list=25%, signal=60%
GOBP_REGULATION_OF_PROTEIN_SERINE_THREONINE_KINASE_ACTIVITY	GOBP_REGULATION_OF_PROTEIN_SERINE_THREONINE_KINASE_ACTIVITY	311	0.285887	1.52245	0.0833333	0.162029	0.796	4101	tags=37%, list=29%, signal=51%
GOBP_REGULATION_OF_REACTIVE_OXYGEN_SPECIES_BIOSYNTHETIC_PROCESS	GOBP_REGULATION_OF_REACTIVE_OXYGEN_SPECIES_BIOSYNTHETIC_PROCESS	41	0.375401	1.52207	0.0388548	0.162139	0.796	4850	tags=51%, list=35%, signal=78%
GOBP_MYELIN_ASSEMBLY	GOBP_MYELIN_ASSEMBLY	25	0.370944	1.52164	0.0861345	0.162255	0.796	1589	tags=28%, list=11%, signal=32%
GOBP_NEURON_CELLULAR_HOMEOSTASIS	GOBP_NEURON_CELLULAR_HOMEOSTASIS	57	0.296554	1.52149	0.0603622	0.162175	0.796	7213	tags=74%, list=52%, signal=152%
GOBP_BRANCHING_MORPHOGENESIS_OF_AN_EPITHELIAL_TUBE	GOBP_BRANCHING_MORPHOGENESIS_OF_AN_EPITHELIAL_TUBE	158	0.297597	1.52104	0.20202	0.162313	0.797	1366	tags=19%, list=10%, signal=21%
GOBP_LONG_CHAIN_FATTY_ACID_BIOSYNTHETIC_PROCESS	GOBP_LONG_CHAIN_FATTY_ACID_BIOSYNTHETIC_PROCESS	22	0.420318	1.52097	0.01875	0.162239	0.797	5356	tags=59%, list=38%, signal=96%
GOBP_RESPONSE_TO_INORGANIC_SUBSTANCE	GOBP_RESPONSE_TO_INORGANIC_SUBSTANCE	394	0.262195	1.52014	0.0375783	0.162691	0.798	3685	tags=35%, list=26%, signal=46%
GOBP_GRANULOCYTE_DIFFERENTIATION	GOBP_GRANULOCYTE_DIFFERENTIATION	37	0.388016	1.51998	0.0706861	0.162664	0.798	1469	tags=27%, list=11%, signal=30%
GOBP_T_HELPER_2_CELL_DIFFERENTIATION	GOBP_T_HELPER_2_CELL_DIFFERENTIATION	16	0.453658	1.51919	0.0843621	0.163051	0.798	4074	tags=50%, list=29%, signal=71%
GOBP_POSITIVE_REGULATION_OF_PEPTIDE_SECRETION	GOBP_POSITIVE_REGULATION_OF_PEPTIDE_SECRETION	108	0.289617	1.51901	0.057732	0.163037	0.798	3398	tags=31%, list=24%, signal=41%
GOBP_EMBRYONIC_PLACENTA_DEVELOPMENT	GOBP_EMBRYONIC_PLACENTA_DEVELOPMENT	94	0.282293	1.51889	0.224242	0.162971	0.798	3530	tags=31%, list=25%, signal=41%
GOBP_WALKING_BEHAVIOR	GOBP_WALKING_BEHAVIOR	37	0.316041	1.51856	0.101626	0.163022	0.799	4024	tags=43%, list=29%, signal=61%
GOBP_REGULATION_OF_BIOMINERAL_TISSUE_DEVELOPMENT	GOBP_REGULATION_OF_BIOMINERAL_TISSUE_DEVELOPMENT	86	0.324721	1.51806	0.125523	0.163231	0.8	2114	tags=26%, list=15%, signal=30%
GOBP_REGULATION_OF_NOTCH_SIGNALING_PATHWAY	GOBP_REGULATION_OF_NOTCH_SIGNALING_PATHWAY	80	0.302387	1.51769	0.130977	0.163348	0.8	2962	tags=31%, list=21%, signal=39%
GOBP_INNERVATION	GOBP_INNERVATION	26	0.410206	1.51743	0.11465	0.163394	0.8	1463	tags=31%, list=11%, signal=34%
GOBP_MATERNAL_PROCESS_INVOLVED_IN_FEMALE_PREGNANCY	GOBP_MATERNAL_PROCESS_INVOLVED_IN_FEMALE_PREGNANCY	42	0.29971	1.51727	0.0204918	0.163356	0.8	3529	tags=36%, list=25%, signal=48%
GOBP_SODIUM_ION_HOMEOSTASIS	GOBP_SODIUM_ION_HOMEOSTASIS	44	0.365447	1.5171	0.0689655	0.163339	0.8	4976	tags=50%, list=36%, signal=78%
GOBP_CARDIAC_SEPTUM_MORPHOGENESIS	GOBP_CARDIAC_SEPTUM_MORPHOGENESIS	69	0.342761	1.51705	0.176715	0.163268	0.8	3642	tags=33%, list=26%, signal=45%
GOBP_FLUID_TRANSPORT	GOBP_FLUID_TRANSPORT	23	0.464366	1.51643	0.137295	0.163484	0.8	4780	tags=61%, list=34%, signal=93%
GOBP_RESPONSE_TO_TRANSFORMING_GROWTH_FACTOR_BETA	GOBP_RESPONSE_TO_TRANSFORMING_GROWTH_FACTOR_BETA	226	0.282086	1.51567	0.126316	0.163859	0.8	3166	tags=31%, list=23%, signal=40%
GOBP_POSITIVE_REGULATION_OF_LONG_TERM_SYNAPTIC_POTENTIATION	GOBP_POSITIVE_REGULATION_OF_LONG_TERM_SYNAPTIC_POTENTIATION	24	0.35856	1.51495	0.0616302	0.164208	0.8	1474	tags=25%, list=11%, signal=28%
GOBP_DICARBOXYLIC_ACID_TRANSPORT	GOBP_DICARBOXYLIC_ACID_TRANSPORT	65	0.312661	1.51456	0.033543	0.164369	0.801	3310	tags=34%, list=24%, signal=44%
GOBP_NEGATIVE_REGULATION_OF_NERVOUS_SYSTEM_DEVELOPMENT	GOBP_NEGATIVE_REGULATION_OF_NERVOUS_SYSTEM_DEVELOPMENT	153	0.267044	1.51393	0.195519	0.164713	0.801	2593	tags=24%, list=19%, signal=29%
GOBP_ACTIN_MEDIATED_CELL_CONTRACTION	GOBP_ACTIN_MEDIATED_CELL_CONTRACTION	86	0.31269	1.51178	0.0873016	0.165975	0.806	3421	tags=37%, list=25%, signal=49%
GOBP_REGULATION_OF_CARDIAC_MUSCLE_CELL_CONTRACTION	GOBP_REGULATION_OF_CARDIAC_MUSCLE_CELL_CONTRACTION	35	0.346366	1.51132	0.139676	0.166119	0.806	6264	tags=60%, list=45%, signal=109%
GOBP_REGULATION_OF_EXECUTION_PHASE_OF_APOPTOSIS	GOBP_REGULATION_OF_EXECUTION_PHASE_OF_APOPTOSIS	19	0.385749	1.51126	0.00828157	0.166035	0.806	372	tags=16%, list=3%, signal=16%
GOBP_NEGATIVE_REGULATION_OF_MEMBRANE_PERMEABILITY	GOBP_NEGATIVE_REGULATION_OF_MEMBRANE_PERMEABILITY	21	0.477651	1.51086	0.0273109	0.166215	0.806	3081	tags=52%, list=22%, signal=67%
GOBP_NEGATIVE_REGULATION_OF_CELL_MATRIX_ADHESION	GOBP_NEGATIVE_REGULATION_OF_CELL_MATRIX_ADHESION	34	0.401574	1.51053	0.067086	0.166282	0.81	3466	tags=44%, list=25%, signal=59%
GOBP_NEGATIVE_REGULATION_OF_SODIUM_ION_TRANSPORT	GOBP_NEGATIVE_REGULATION_OF_SODIUM_ION_TRANSPORT	16	0.418277	1.51017	0.0714286	0.166382	0.81	5749	tags=69%, list=41%, signal=117%
GOBP_REGULATION_OF_SODIUM_ION_TRANSPORT	GOBP_REGULATION_OF_SODIUM_ION_TRANSPORT	85	0.277891	1.50967	0.111789	0.16657	0.815	5837	tags=54%, list=42%, signal=93%
GOBP_REGULATION_OF_NEUROTRANSMITTER_SECRETION	GOBP_REGULATION_OF_NEUROTRANSMITTER_SECRETION	74	0.248055	1.50936	0.0737052	0.166651	0.815	3389	tags=31%, list=24%, signal=41%
GOBP_POSITIVE_REGULATION_OF_PROTEOLYSIS	GOBP_POSITIVE_REGULATION_OF_PROTEOLYSIS	331	0.288048	1.5093	0.0251046	0.166584	0.816	7469	tags=68%, list=54%, signal=144%
GOBP_REGULATION_OF_NERVOUS_SYSTEM_PROCESS	GOBP_REGULATION_OF_NERVOUS_SYSTEM_PROCESS	134	0.313694	1.50922	0.0809717	0.166499	0.816	1943	tags=25%, list=14%, signal=28%
GOBP_LABYRINTHINE_LAYER_BLOOD_VESSEL_DEVELOPMENT	GOBP_LABYRINTHINE_LAYER_BLOOD_VESSEL_DEVELOPMENT	23	0.354839	1.50873	0.104938	0.166705	0.818	3883	tags=48%, list=28%, signal=66%
GOBP_POSITIVE_REGULATION_OF_T_HELPER_CELL_DIFFERENTIATION	GOBP_POSITIVE_REGULATION_OF_T_HELPER_CELL_DIFFERENTIATION	15	0.48947	1.50871	0.0934959	0.166587	0.818	5359	tags=67%, list=38%, signal=108%
GOBP_DIGESTION	GOBP_DIGESTION	74	0.318875	1.5078	0.0661157	0.167031	0.818	1845	tags=22%, list=13%, signal=25%
GOBP_FEMALE_PREGNANCY	GOBP_FEMALE_PREGNANCY	106	0.272448	1.5075	0.014553	0.167118	0.821	3529	tags=31%, list=25%, signal=41%
GOBP_CERAMIDE_CATABOLIC_PROCESS	GOBP_CERAMIDE_CATABOLIC_PROCESS	17	0.50065	1.50716	0.12	0.167187	0.821	2981	tags=59%, list=21%, signal=75%
GOBP_SYNAPTIC_VESICLE_MATURATION	GOBP_SYNAPTIC_VESICLE_MATURATION	26	0.410437	1.50712	0.0710059	0.167073	0.821	7213	tags=85%, list=52%, signal=175%
GOBP_DIACYLGLYCEROL_METABOLIC_PROCESS	GOBP_DIACYLGLYCEROL_METABOLIC_PROCESS	24	0.341566	1.50675	0.0721649	0.167196	0.822	2172	tags=29%, list=16%, signal=34%
GOBP_RESPIRATORY_SYSTEM_DEVELOPMENT	GOBP_RESPIRATORY_SYSTEM_DEVELOPMENT	210	0.27996	1.50652	0.170833	0.167226	0.822	2929	tags=26%, list=21%, signal=33%
GOBP_REGULATION_OF_AXONOGENESIS	GOBP_REGULATION_OF_AXONOGENESIS	170	0.277077	1.50586	0.240816	0.167581	0.822	3530	tags=32%, list=25%, signal=43%
GOBP_LABYRINTHINE_LAYER_DEVELOPMENT	GOBP_LABYRINTHINE_LAYER_DEVELOPMENT	50	0.319766	1.50538	0.0975104	0.16781	0.824	3530	tags=34%, list=25%, signal=45%
GOBP_REGULATION_OF_MEMBRANE_PERMEABILITY	GOBP_REGULATION_OF_MEMBRANE_PERMEABILITY	72	0.356281	1.50363	0	0.168754	0.824	4814	tags=53%, list=35%, signal=80%
GOBP_THYROID_HORMONE_METABOLIC_PROCESS	GOBP_THYROID_HORMONE_METABOLIC_PROCESS	16	0.474897	1.50345	0.0462185	0.168742	0.824	2071	tags=38%, list=15%, signal=44%
GOBP_MOVEMENT_IN_HOST	GOBP_MOVEMENT_IN_HOST	102	0.313557	1.50343	0.0487805	0.168627	0.824	6785	tags=64%, list=49%, signal=123%
GOBP_CELLULAR_METABOLIC_COMPOUND_SALVAGE	GOBP_CELLULAR_METABOLIC_COMPOUND_SALVAGE	31	0.415919	1.50312	0.116935	0.168699	0.824	5682	tags=71%, list=41%, signal=120%
GOBP_REGULATION_OF_ENDOCRINE_PROCESS	GOBP_REGULATION_OF_ENDOCRINE_PROCESS	37	0.389237	1.50286	0.125253	0.168759	0.826	1897	tags=30%, list=14%, signal=34%
GOBP_SODIUM_ION_TRANSPORT	GOBP_SODIUM_ION_TRANSPORT	171	0.275776	1.50269	0.0920245	0.168734	0.826	5178	tags=44%, list=37%, signal=70%
GOBP_NEGATIVE_REGULATION_OF_CELL_SUBSTRATE_ADHESION	GOBP_NEGATIVE_REGULATION_OF_CELL_SUBSTRATE_ADHESION	54	0.364076	1.50047	0.083682	0.17015	0.83	3709	tags=41%, list=27%, signal=55%
GOBP_CARBOHYDRATE_DERIVATIVE_TRANSPORT	GOBP_CARBOHYDRATE_DERIVATIVE_TRANSPORT	59	0.348639	1.50027	0.0854167	0.170136	0.831	5761	tags=59%, list=41%, signal=101%
GOBP_REGULATION_OF_RYANODINE_SENSITIVE_CALCIUM_RELEASE_CHANNEL_ACTIVITY	GOBP_REGULATION_OF_RYANODINE_SENSITIVE_CALCIUM_RELEASE_CHANNEL_ACTIVITY	19	0.448044	1.50002	0.0770751	0.170144	0.832	4807	tags=63%, list=35%, signal=96%
GOBP_NEGATIVE_REGULATION_OF_MUSCLE_CONTRACTION	GOBP_NEGATIVE_REGULATION_OF_MUSCLE_CONTRACTION	29	0.434376	1.49944	0.150713	0.170397	0.832	2084	tags=38%, list=15%, signal=45%
GOBP_NEGATIVE_CHEMOTAXIS	GOBP_NEGATIVE_CHEMOTAXIS	39	0.413651	1.4993	0.2	0.170369	0.832	2531	tags=33%, list=18%, signal=41%
GOBP_REGULATION_OF_CALCIUM_ION_TRANSMEMBRANE_TRANSPORTER_ACTIVITY	GOBP_REGULATION_OF_CALCIUM_ION_TRANSMEMBRANE_TRANSPORTER_ACTIVITY	74	0.294875	1.49816	0.123772	0.170987	0.834	3377	tags=38%, list=24%, signal=50%
GOBP_CELL_JUNCTION_ASSEMBLY	GOBP_CELL_JUNCTION_ASSEMBLY	369	0.259198	1.49761	0.285141	0.171243	0.834	2514	tags=24%, list=18%, signal=29%
GOBP_REGULATION_OF_COMPLEMENT_ACTIVATION	GOBP_REGULATION_OF_COMPLEMENT_ACTIVATION	17	0.512821	1.49746	0.0977597	0.17121	0.834	1481	tags=47%, list=11%, signal=53%
GOBP_REGULATION_OF_STRIATED_MUSCLE_CONTRACTION	GOBP_REGULATION_OF_STRIATED_MUSCLE_CONTRACTION	75	0.303862	1.49729	0.127273	0.171171	0.834	6264	tags=59%, list=45%, signal=106%
GOBP_POSITIVE_REGULATION_OF_ERBB_SIGNALING_PATHWAY	GOBP_POSITIVE_REGULATION_OF_ERBB_SIGNALING_PATHWAY	30	0.363216	1.49699	0.15121	0.171224	0.834	3267	tags=40%, list=23%, signal=52%
GOBP_REGULATION_OF_EPITHELIAL_CELL_APOPTOTIC_PROCESS	GOBP_REGULATION_OF_EPITHELIAL_CELL_APOPTOTIC_PROCESS	89	0.308034	1.49638	0.138365	0.171526	0.836	3778	tags=37%, list=27%, signal=51%
GOBP_EAR_DEVELOPMENT	GOBP_EAR_DEVELOPMENT	189	0.291422	1.49578	0.195918	0.171818	0.837	3777	tags=31%, list=27%, signal=42%
GOBP_CATECHOL_CONTAINING_COMPOUND_METABOLIC_PROCESS	GOBP_CATECHOL_CONTAINING_COMPOUND_METABOLIC_PROCESS	41	0.371798	1.49474	0.129098	0.172306	0.838	3594	tags=41%, list=26%, signal=56%
GOBP_REGULATION_OF_RAC_PROTEIN_SIGNAL_TRANSDUCTION	GOBP_REGULATION_OF_RAC_PROTEIN_SIGNAL_TRANSDUCTION	26	0.371521	1.49463	0.0743802	0.172248	0.839	1559	tags=27%, list=11%, signal=30%
GOBP_HEART_MORPHOGENESIS	GOBP_HEART_MORPHOGENESIS	237	0.284013	1.49441	0.229167	0.172244	0.839	2795	tags=26%, list=20%, signal=32%
GOBP_NEURAL_PRECURSOR_CELL_PROLIFERATION	GOBP_NEURAL_PRECURSOR_CELL_PROLIFERATION	170	0.275782	1.49409	0.22293	0.172339	0.839	4101	tags=35%, list=29%, signal=49%
GOBP_COCHLEA_MORPHOGENESIS	GOBP_COCHLEA_MORPHOGENESIS	23	0.463304	1.49402	0.14876	0.172251	0.839	541	tags=17%, list=4%, signal=18%
GOBP_CELLULAR_RESPONSE_TO_VIRUS	GOBP_CELLULAR_RESPONSE_TO_VIRUS	39	0.340306	1.49374	0.101215	0.172288	0.839	6413	tags=67%, list=46%, signal=123%
GOBP_REGULATION_OF_PROTEIN_KINASE_C_SIGNALING	GOBP_REGULATION_OF_PROTEIN_KINASE_C_SIGNALING	18	0.410748	1.49368	0.0653846	0.172209	0.839	2258	tags=33%, list=16%, signal=40%
GOBP_REGULATION_OF_MONOATOMIC_ANION_TRANSPORT	GOBP_REGULATION_OF_MONOATOMIC_ANION_TRANSPORT	21	0.362297	1.49318	0.0817996	0.172389	0.84	2425	tags=29%, list=17%, signal=35%
GOBP_OLIGOSACCHARIDE_BIOSYNTHETIC_PROCESS	GOBP_OLIGOSACCHARIDE_BIOSYNTHETIC_PROCESS	15	0.477159	1.4927	0.0991735	0.172551	0.842	3722	tags=53%, list=27%, signal=73%
GOBP_PANCREAS_DEVELOPMENT	GOBP_PANCREAS_DEVELOPMENT	51	0.331318	1.49232	0.0605428	0.172646	0.842	1463	tags=18%, list=11%, signal=20%
GOBP_POSITIVE_REGULATION_OF_LAMELLIPODIUM_ASSEMBLY	GOBP_POSITIVE_REGULATION_OF_LAMELLIPODIUM_ASSEMBLY	26	0.433098	1.49213	0.0336842	0.17266	0.845	3489	tags=54%, list=25%, signal=72%
GOBP_CYCLIC_NUCLEOTIDE_METABOLIC_PROCESS	GOBP_CYCLIC_NUCLEOTIDE_METABOLIC_PROCESS	23	0.443546	1.49203	0.144898	0.172587	0.845	2143	tags=39%, list=15%, signal=46%
GOBP_CELLULAR_RESPONSE_TO_CAMP	GOBP_CELLULAR_RESPONSE_TO_CAMP	32	0.369158	1.49195	0.185714	0.172515	0.845	2430	tags=34%, list=17%, signal=42%
GOBP_NEURAL_RETINA_DEVELOPMENT	GOBP_NEURAL_RETINA_DEVELOPMENT	47	0.379085	1.49121	0.101053	0.172851	0.847	1875	tags=26%, list=13%, signal=29%
GOBP_RESPONSE_TO_DSRNA	GOBP_RESPONSE_TO_DSRNA	39	0.38788	1.49095	0.0477178	0.172878	0.847	3790	tags=49%, list=27%, signal=67%
GOBP_REGULATION_OF_CELLULAR_COMPONENT_SIZE	GOBP_REGULATION_OF_CELLULAR_COMPONENT_SIZE	348	0.271495	1.49093	0.126556	0.172757	0.847	3979	tags=37%, list=29%, signal=51%
GOBP_VISUAL_BEHAVIOR	GOBP_VISUAL_BEHAVIOR	52	0.312457	1.4903	0.139165	0.173004	0.848	6276	tags=58%, list=45%, signal=105%
GOBP_POSITIVE_REGULATION_OF_PROTEIN_TARGETING_TO_MEMBRANE	GOBP_POSITIVE_REGULATION_OF_PROTEIN_TARGETING_TO_MEMBRANE	26	0.382395	1.49023	0.0793319	0.172912	0.848	6211	tags=69%, list=45%, signal=125%
GOBP_TRANSMEMBRANE_RECEPTOR_PROTEIN_SERINE_THREONINE_KINASE_SIGNALING_PATHWAY	GOBP_TRANSMEMBRANE_RECEPTOR_PROTEIN_SERINE_THREONINE_KINASE_SIGNALING_PATHWAY	319	0.260927	1.4901	0.158562	0.17287	0.848	3529	tags=31%, list=25%, signal=41%
GOBP_PROSTATE_GLAND_MORPHOGENESIS	GOBP_PROSTATE_GLAND_MORPHOGENESIS	27	0.438132	1.48936	0.112527	0.173131	0.849	1366	tags=22%, list=10%, signal=25%
GOBP_NEGATIVE_REGULATION_OF_MUSCLE_CELL_APOPTOTIC_PROCESS	GOBP_NEGATIVE_REGULATION_OF_MUSCLE_CELL_APOPTOTIC_PROCESS	55	0.335408	1.48926	0.0647182	0.173051	0.849	5285	tags=55%, list=38%, signal=88%
GOBP_REGULATION_OF_MEMBRANE_REPOLARIZATION	GOBP_REGULATION_OF_MEMBRANE_REPOLARIZATION	30	0.369709	1.48867	0.0996016	0.173289	0.849	3421	tags=43%, list=25%, signal=57%
GOBP_REGULATION_OF_ENDOCYTOSIS	GOBP_REGULATION_OF_ENDOCYTOSIS	210	0.281988	1.48862	0.0847108	0.173196	0.849	3423	tags=34%, list=25%, signal=44%
GOBP_POST_TRANSLATIONAL_PROTEIN_TARGETING_TO_ENDOPLASMIC_RETICULUM_MEMBRANE	GOBP_POST_TRANSLATIONAL_PROTEIN_TARGETING_TO_ENDOPLASMIC_RETICULUM_MEMBRANE	19	0.416628	1.48823	0.0184049	0.173326	0.849	7522	tags=89%, list=54%, signal=194%
GOBP_POSITIVE_REGULATION_OF_RESPONSE_TO_ENDOPLASMIC_RETICULUM_STRESS	GOBP_POSITIVE_REGULATION_OF_RESPONSE_TO_ENDOPLASMIC_RETICULUM_STRESS	33	0.405556	1.48818	0.00612245	0.173238	0.849	7256	tags=85%, list=52%, signal=177%
GOBP_MEMBRANE_DEPOLARIZATION	GOBP_MEMBRANE_DEPOLARIZATION	67	0.316194	1.48801	0.142574	0.173224	0.849	4164	tags=45%, list=30%, signal=64%
GOBP_REGULATION_OF_ERYTHROCYTE_DIFFERENTIATION	GOBP_REGULATION_OF_ERYTHROCYTE_DIFFERENTIATION	49	0.346964	1.48707	0.117526	0.173689	0.851	1791	tags=22%, list=13%, signal=26%
GOBP_IRON_ION_HOMEOSTASIS	GOBP_IRON_ION_HOMEOSTASIS	71	0.340241	1.48655	0.0905433	0.173938	0.852	6336	tags=65%, list=45%, signal=118%
GOBP_INTRINSIC_APOPTOTIC_SIGNALING_PATHWAY_IN_RESPONSE_TO_DNA_DAMAGE	GOBP_INTRINSIC_APOPTOTIC_SIGNALING_PATHWAY_IN_RESPONSE_TO_DNA_DAMAGE	109	0.304273	1.48638	0.0914761	0.173937	0.856	4074	tags=39%, list=29%, signal=55%
GOBP_POSITIVE_REGULATION_OF_DEPHOSPHORYLATION	GOBP_POSITIVE_REGULATION_OF_DEPHOSPHORYLATION	57	0.325332	1.48594	0.0729167	0.174088	0.856	1140	tags=19%, list=8%, signal=21%
GOBP_NEGATIVE_REGULATION_OF_PLATELET_ACTIVATION	GOBP_NEGATIVE_REGULATION_OF_PLATELET_ACTIVATION	17	0.461572	1.48579	0.151064	0.174058	0.856	2437	tags=41%, list=17%, signal=50%
GOBP_MORPHOGENESIS_OF_AN_EPITHELIAL_FOLD	GOBP_MORPHOGENESIS_OF_AN_EPITHELIAL_FOLD	24	0.4202	1.48487	0.101626	0.174498	0.857	837	tags=17%, list=6%, signal=18%
GOBP_MONOATOMIC_ANION_TRANSPORT	GOBP_MONOATOMIC_ANION_TRANSPORT	94	0.275468	1.48479	0.0502092	0.174441	0.857	2478	tags=22%, list=18%, signal=27%
GOBP_ANGIOTENSIN_ACTIVATED_SIGNALING_PATHWAY	GOBP_ANGIOTENSIN_ACTIVATED_SIGNALING_PATHWAY	15	0.441851	1.48419	0.0743802	0.1747	0.857	6733	tags=80%, list=48%, signal=155%
GOBP_KERATINIZATION	GOBP_KERATINIZATION	37	0.462413	1.48409	0.177686	0.174685	0.858	1067	tags=27%, list=8%, signal=29%
GOBP_POTASSIUM_ION_TRANSPORT	GOBP_POTASSIUM_ION_TRANSPORT	159	0.277796	1.48273	0.104	0.175481	0.861	3527	tags=33%, list=25%, signal=44%
GOBP_NEGATIVE_REGULATION_OF_PROTEIN_PHOSPHORYLATION	GOBP_NEGATIVE_REGULATION_OF_PROTEIN_PHOSPHORYLATION	313	0.278422	1.48262	0.0582121	0.175445	0.861	3160	tags=31%, list=23%, signal=40%
GOBP_NEGATIVE_REGULATION_OF_ANOIKIS	GOBP_NEGATIVE_REGULATION_OF_ANOIKIS	15	0.449525	1.48243	0.0357143	0.175426	0.861	3533	tags=53%, list=25%, signal=71%
GOBP_HYDROGEN_PEROXIDE_CATABOLIC_PROCESS	GOBP_HYDROGEN_PEROXIDE_CATABOLIC_PROCESS	17	0.496807	1.48196	0.142857	0.175566	0.861	4730	tags=76%, list=34%, signal=116%
GOBP_POSITIVE_REGULATION_OF_PROTEIN_AUTOPHOSPHORYLATION	GOBP_POSITIVE_REGULATION_OF_PROTEIN_AUTOPHOSPHORYLATION	25	0.386344	1.48129	0.162887	0.17589	0.865	1038	tags=20%, list=7%, signal=22%
GOBP_NEGATIVE_REGULATION_OF_PROTEIN_POLYMERIZATION	GOBP_NEGATIVE_REGULATION_OF_PROTEIN_POLYMERIZATION	76	0.307754	1.48108	0.0989474	0.175927	0.865	4447	tags=47%, list=32%, signal=69%
GOBP_REGULATION_OF_HEART_GROWTH	GOBP_REGULATION_OF_HEART_GROWTH	73	0.303916	1.48075	0.0657084	0.176013	0.865	2795	tags=30%, list=20%, signal=38%
GOBP_REGULATION_OF_EPITHELIAL_TO_MESENCHYMAL_TRANSITION	GOBP_REGULATION_OF_EPITHELIAL_TO_MESENCHYMAL_TRANSITION	92	0.312152	1.47972	0.138075	0.176582	0.868	3484	tags=35%, list=25%, signal=46%
GOBP_RESPONSE_TO_ETHANOL	GOBP_RESPONSE_TO_ETHANOL	45	0.348044	1.47919	0.107143	0.176766	0.868	2492	tags=33%, list=18%, signal=40%
GOBP_NUCLEOTIDE_BINDING_DOMAIN_LEUCINE_RICH_REPEAT_CONTAINING_RECEPTOR_SIGNALING_PATHWAY	GOBP_NUCLEOTIDE_BINDING_DOMAIN_LEUCINE_RICH_REPEAT_CONTAINING_RECEPTOR_SIGNALING_PATHWAY	22	0.414757	1.47906	0.0893971	0.176725	0.868	1877	tags=32%, list=13%, signal=37%
GOBP_MYOBLAST_DIFFERENTIATION	GOBP_MYOBLAST_DIFFERENTIATION	110	0.293952	1.47848	0.179381	0.176907	0.868	3744	tags=36%, list=27%, signal=49%
GOBP_AMMONIUM_ION_METABOLIC_PROCESS	GOBP_AMMONIUM_ION_METABOLIC_PROCESS	16	0.416762	1.47841	0.121272	0.176818	0.868	1482	tags=25%, list=11%, signal=28%
GOBP_POSITIVE_REGULATION_OF_MUSCLE_HYPERTROPHY	GOBP_POSITIVE_REGULATION_OF_MUSCLE_HYPERTROPHY	37	0.316867	1.4783	0.0800821	0.176749	0.868	7404	tags=73%, list=53%, signal=155%
GOBP_SENSORY_PERCEPTION_OF_MECHANICAL_STIMULUS	GOBP_SENSORY_PERCEPTION_OF_MECHANICAL_STIMULUS	135	0.288554	1.47828	0.0969072	0.176634	0.868	4387	tags=41%, list=31%, signal=59%
GOBP_NEGATIVE_REGULATION_OF_MYOBLAST_DIFFERENTIATION	GOBP_NEGATIVE_REGULATION_OF_MYOBLAST_DIFFERENTIATION	28	0.397489	1.47752	0.0806452	0.176986	0.87	2252	tags=32%, list=16%, signal=38%
GOBP_REGULATION_OF_CYCLASE_ACTIVITY	GOBP_REGULATION_OF_CYCLASE_ACTIVITY	36	0.3559	1.47749	0.141988	0.176873	0.87	2742	tags=33%, list=20%, signal=41%
GOBP_REGULATION_OF_SYNAPTIC_VESICLE_RECYCLING	GOBP_REGULATION_OF_SYNAPTIC_VESICLE_RECYCLING	32	0.373351	1.47718	0.0777311	0.176958	0.87	3982	tags=50%, list=29%, signal=70%
GOBP_NEPHRON_DEVELOPMENT	GOBP_NEPHRON_DEVELOPMENT	131	0.288812	1.4768	0.232932	0.177089	0.87	1841	tags=21%, list=13%, signal=24%
GOBP_CELLULAR_RESPONSE_TO_CHEMICAL_STRESS	GOBP_CELLULAR_RESPONSE_TO_CHEMICAL_STRESS	299	0.284651	1.47673	0.0248963	0.177003	0.87	3555	tags=35%, list=26%, signal=46%
GOBP_PROTEIN_LOCALIZATION_TO_CELL_SURFACE	GOBP_PROTEIN_LOCALIZATION_TO_CELL_SURFACE	70	0.317252	1.47569	0.0269151	0.177613	0.872	3104	tags=33%, list=22%, signal=42%
GOBP_REGULATION_OF_UBIQUITIN_PROTEIN_LIGASE_ACTIVITY	GOBP_REGULATION_OF_UBIQUITIN_PROTEIN_LIGASE_ACTIVITY	18	0.475648	1.47425	0.0708333	0.178434	0.872	7158	tags=94%, list=51%, signal=194%
GOBP_DETECTION_OF_EXTERNAL_STIMULUS	GOBP_DETECTION_OF_EXTERNAL_STIMULUS	65	0.319863	1.47418	0.0755102	0.178349	0.872	2609	tags=32%, list=19%, signal=40%
GOBP_EXTRACELLULAR_MATRIX_CONSTITUENT_SECRETION	GOBP_EXTRACELLULAR_MATRIX_CONSTITUENT_SECRETION	15	0.430332	1.47312	0.0613497	0.178889	0.872	4972	tags=60%, list=36%, signal=93%
GOBP_REGULATION_OF_NUCLEOTIDE_BIOSYNTHETIC_PROCESS	GOBP_REGULATION_OF_NUCLEOTIDE_BIOSYNTHETIC_PROCESS	31	0.353308	1.47294	0.11245	0.178882	0.872	3530	tags=42%, list=25%, signal=56%
GOBP_NEGATIVE_REGULATION_OF_NEURAL_PRECURSOR_CELL_PROLIFERATION	GOBP_NEGATIVE_REGULATION_OF_NEURAL_PRECURSOR_CELL_PROLIFERATION	27	0.340778	1.47289	0.0497925	0.178798	0.872	2195	tags=26%, list=16%, signal=31%
GOBP_NEGATIVE_REGULATION_OF_NEURON_DEATH	GOBP_NEGATIVE_REGULATION_OF_NEURON_DEATH	229	0.25559	1.4724	0.0774059	0.178974	0.872	2780	tags=28%, list=20%, signal=34%
GOBP_ANATOMICAL_STRUCTURE_MATURATION	GOBP_ANATOMICAL_STRUCTURE_MATURATION	214	0.262374	1.47209	0.196721	0.179055	0.872	3463	tags=31%, list=25%, signal=40%
GOBP_RESPONSE_TO_OSMOTIC_STRESS	GOBP_RESPONSE_TO_OSMOTIC_STRESS	77	0.307086	1.4717	0.110204	0.179188	0.873	3389	tags=36%, list=24%, signal=48%
GOBP_DEVELOPMENTAL_MATURATION	GOBP_DEVELOPMENTAL_MATURATION	278	0.242618	1.47156	0.162887	0.179159	0.873	3463	tags=31%, list=25%, signal=40%
GOBP_NEGATIVE_REGULATION_OF_I_KAPPAB_KINASE_NF_KAPPAB_SIGNALING	GOBP_NEGATIVE_REGULATION_OF_I_KAPPAB_KINASE_NF_KAPPAB_SIGNALING	44	0.297066	1.47104	0.0665281	0.179391	0.873	2087	tags=23%, list=15%, signal=27%
GOBP_CELLULAR_RESPONSE_TO_CARBOHYDRATE_STIMULUS	GOBP_CELLULAR_RESPONSE_TO_CARBOHYDRATE_STIMULUS	125	0.264949	1.47067	0.0574949	0.179498	0.874	7828	tags=67%, list=56%, signal=152%
GOBP_REGULATION_OF_PROTEIN_LOCALIZATION_TO_CELL_SURFACE	GOBP_REGULATION_OF_PROTEIN_LOCALIZATION_TO_CELL_SURFACE	42	0.336553	1.46997	0.00414079	0.179798	0.874	3412	tags=38%, list=24%, signal=50%
GOBP_NEGATIVE_REGULATION_OF_CELLULAR_RESPONSE_TO_GROWTH_FACTOR_STIMULUS	GOBP_NEGATIVE_REGULATION_OF_CELLULAR_RESPONSE_TO_GROWTH_FACTOR_STIMULUS	85	0.306778	1.4699	0.144628	0.179711	0.874	1559	tags=21%, list=11%, signal=24%
GOBP_REGULATION_OF_SYNAPTIC_PLASTICITY	GOBP_REGULATION_OF_SYNAPTIC_PLASTICITY	179	0.262235	1.46918	0.13786	0.180131	0.874	3209	tags=30%, list=23%, signal=39%
GOBP_VENTRICULAR_SEPTUM_MORPHOGENESIS	GOBP_VENTRICULAR_SEPTUM_MORPHOGENESIS	45	0.347498	1.46889	0.203354	0.18014	0.874	3642	tags=36%, list=26%, signal=48%
GOBP_INORGANIC_ANION_TRANSPORT	GOBP_INORGANIC_ANION_TRANSPORT	92	0.276561	1.46814	0.0444915	0.180512	0.878	6046	tags=51%, list=43%, signal=90%
GOBP_REGULATION_OF_VIRAL_INDUCED_CYTOPLASMIC_PATTERN_RECOGNITION_RECEPTOR_SIGNALING_PATHWAY	GOBP_REGULATION_OF_VIRAL_INDUCED_CYTOPLASMIC_PATTERN_RECOGNITION_RECEPTOR_SIGNALING_PATHWAY	47	0.326705	1.46789	0.0606061	0.180573	0.878	1256	tags=21%, list=9%, signal=23%
GOBP_POSITIVE_REGULATION_OF_PROTEIN_POLYUBIQUITINATION	GOBP_POSITIVE_REGULATION_OF_PROTEIN_POLYUBIQUITINATION	16	0.431665	1.46777	0.0868644	0.18053	0.878	4788	tags=56%, list=34%, signal=86%
GOBP_REGULATION_OF_OXIDATIVE_STRESS_INDUCED_CELL_DEATH	GOBP_REGULATION_OF_OXIDATIVE_STRESS_INDUCED_CELL_DEATH	70	0.305103	1.46733	0.0509165	0.180671	0.878	2610	tags=29%, list=19%, signal=35%
GOBP_NEGATIVE_REGULATION_OF_TISSUE_REMODELING	GOBP_NEGATIVE_REGULATION_OF_TISSUE_REMODELING	21	0.38699	1.46721	0.146245	0.180611	0.878	2083	tags=33%, list=15%, signal=39%
GOBP_REGULATION_OF_PHOSPHATIDYLINOSITOL_3_KINASE_ACTIVITY	GOBP_REGULATION_OF_PHOSPHATIDYLINOSITOL_3_KINASE_ACTIVITY	36	0.371126	1.4666	0.170385	0.180909	0.878	3282	tags=39%, list=24%, signal=51%
GOBP_NEGATIVE_REGULATION_OF_PROTEIN_TYROSINE_KINASE_ACTIVITY	GOBP_NEGATIVE_REGULATION_OF_PROTEIN_TYROSINE_KINASE_ACTIVITY	28	0.35236	1.46577	0.0416667	0.181289	0.878	1989	tags=29%, list=14%, signal=33%
GOBP_PSEUDOPODIUM_ORGANIZATION	GOBP_PSEUDOPODIUM_ORGANIZATION	15	0.402753	1.46527	0.0995935	0.181514	0.878	5147	tags=60%, list=37%, signal=95%
GOBP_LOCOMOTORY_EXPLORATION_BEHAVIOR	GOBP_LOCOMOTORY_EXPLORATION_BEHAVIOR	16	0.433254	1.4649	0.104743	0.181608	0.878	6001	tags=75%, list=43%, signal=132%
GOBP_REGULATION_OF_LYASE_ACTIVITY	GOBP_REGULATION_OF_LYASE_ACTIVITY	38	0.345773	1.46489	0.154	0.181485	0.878	6201	tags=58%, list=45%, signal=104%
GOBP_COCHLEA_DEVELOPMENT	GOBP_COCHLEA_DEVELOPMENT	41	0.362535	1.46485	0.200422	0.181377	0.878	831	tags=15%, list=6%, signal=16%
GOBP_PROTEIN_N_LINKED_GLYCOSYLATION_VIA_ASPARAGINE	GOBP_PROTEIN_N_LINKED_GLYCOSYLATION_VIA_ASPARAGINE	16	0.509418	1.46461	0.0855397	0.181385	0.878	5866	tags=88%, list=42%, signal=151%
GOBP_AXON_DEVELOPMENT	GOBP_AXON_DEVELOPMENT	448	0.253984	1.46458	0.245868	0.181282	0.878	3744	tags=31%, list=27%, signal=42%
GOBP_MEMBRANE_FUSION	GOBP_MEMBRANE_FUSION	132	0.282123	1.46433	0.00838574	0.181316	0.878	7125	tags=66%, list=51%, signal=134%
GOBP_REGULATION_OF_ACTIN_FILAMENT_BASED_MOVEMENT	GOBP_REGULATION_OF_ACTIN_FILAMENT_BASED_MOVEMENT	42	0.34511	1.46432	0.148297	0.181206	0.878	6264	tags=60%, list=45%, signal=108%
GOBP_ACIDIC_AMINO_ACID_TRANSPORT	GOBP_ACIDIC_AMINO_ACID_TRANSPORT	47	0.300007	1.46411	0.0329897	0.181184	0.878	3310	tags=34%, list=24%, signal=45%
GOBP_INNER_EAR_MORPHOGENESIS	GOBP_INNER_EAR_MORPHOGENESIS	80	0.339305	1.46407	0.219207	0.181098	0.878	1834	tags=21%, list=13%, signal=24%
GOBP_REGULATION_OF_ERAD_PATHWAY	GOBP_REGULATION_OF_ERAD_PATHWAY	24	0.396796	1.46354	0.0222672	0.181351	0.878	7546	tags=88%, list=54%, signal=191%
GOBP_NEGATIVE_REGULATION_OF_CATECHOLAMINE_SECRETION	GOBP_NEGATIVE_REGULATION_OF_CATECHOLAMINE_SECRETION	15	0.488268	1.46327	0.08	0.181392	0.878	2863	tags=40%, list=21%, signal=50%
GOBP_LONG_TERM_MEMORY	GOBP_LONG_TERM_MEMORY	32	0.32457	1.46192	0.157464	0.182092	0.881	2673	tags=28%, list=19%, signal=35%
GOBP_CELL_MATURATION	GOBP_CELL_MATURATION	148	0.271596	1.46192	0.172199	0.181964	0.881	3463	tags=32%, list=25%, signal=42%
GOBP_RESPIRATORY_SYSTEM_PROCESS	GOBP_RESPIRATORY_SYSTEM_PROCESS	32	0.321401	1.45834	0.082495	0.184246	0.882	1818	tags=25%, list=13%, signal=29%
GOBP_POSITIVE_REGULATION_OF_ALCOHOL_BIOSYNTHETIC_PROCESS	GOBP_POSITIVE_REGULATION_OF_ALCOHOL_BIOSYNTHETIC_PROCESS	23	0.408235	1.45797	0.111562	0.184381	0.882	2523	tags=35%, list=18%, signal=42%
GOBP_NEUROTRANSMITTER_UPTAKE	GOBP_NEUROTRANSMITTER_UPTAKE	22	0.408036	1.45762	0.0561331	0.184468	0.882	3052	tags=36%, list=22%, signal=46%
GOBP_NEGATIVE_REGULATION_OF_INTRACELLULAR_PROTEIN_TRANSPORT	GOBP_NEGATIVE_REGULATION_OF_INTRACELLULAR_PROTEIN_TRANSPORT	42	0.37598	1.45713	0.0587002	0.184667	0.882	5999	tags=67%, list=43%, signal=117%
GOBP_VESICLE_MEDIATED_TRANSPORT_IN_SYNAPSE	GOBP_VESICLE_MEDIATED_TRANSPORT_IN_SYNAPSE	208	0.23687	1.45684	0.0639175	0.18476	0.882	7233	tags=62%, list=52%, signal=126%
GOBP_PEPTIDE_CATABOLIC_PROCESS	GOBP_PEPTIDE_CATABOLIC_PROCESS	21	0.39052	1.45677	0.0807453	0.184677	0.882	5990	tags=71%, list=43%, signal=125%
GOBP_NEGATIVE_REGULATION_OF_NF_KAPPAB_TRANSCRIPTION_FACTOR_ACTIVITY	GOBP_NEGATIVE_REGULATION_OF_NF_KAPPAB_TRANSCRIPTION_FACTOR_ACTIVITY	72	0.289747	1.45675	0.0409836	0.184571	0.882	8186	tags=75%, list=59%, signal=181%
GOBP_AORTA_DEVELOPMENT	GOBP_AORTA_DEVELOPMENT	66	0.372936	1.45673	0.176471	0.18445	0.882	2427	tags=29%, list=17%, signal=35%
GOBP_MORPHOGENESIS_OF_A_BRANCHING_STRUCTURE	GOBP_MORPHOGENESIS_OF_A_BRANCHING_STRUCTURE	205	0.280557	1.45648	0.219207	0.18448	0.882	1366	tags=17%, list=10%, signal=19%
GOBP_DEOXYRIBONUCLEOTIDE_CATABOLIC_PROCESS	GOBP_DEOXYRIBONUCLEOTIDE_CATABOLIC_PROCESS	21	0.43855	1.45633	0.126819	0.184451	0.884	2926	tags=43%, list=21%, signal=54%
GOBP_RUFFLE_ORGANIZATION	GOBP_RUFFLE_ORGANIZATION	54	0.342412	1.45537	0.0679012	0.185024	0.886	5661	tags=57%, list=41%, signal=96%
GOBP_REGULATION_OF_DIGESTIVE_SYSTEM_PROCESS	GOBP_REGULATION_OF_DIGESTIVE_SYSTEM_PROCESS	29	0.370866	1.45505	0.102616	0.185125	0.886	1697	tags=24%, list=12%, signal=27%
GOBP_OLEFINIC_COMPOUND_BIOSYNTHETIC_PROCESS	GOBP_OLEFINIC_COMPOUND_BIOSYNTHETIC_PROCESS	16	0.453365	1.45379	0.133603	0.185826	0.89	3381	tags=38%, list=24%, signal=49%
GOBP_NEGATIVE_REGULATION_OF_SMOOTH_MUSCLE_CONTRACTION	GOBP_NEGATIVE_REGULATION_OF_SMOOTH_MUSCLE_CONTRACTION	19	0.487412	1.45324	0.171371	0.186093	0.89	2081	tags=42%, list=15%, signal=49%
GOBP_VASCULAR_ASSOCIATED_SMOOTH_MUSCLE_CELL_MIGRATION	GOBP_VASCULAR_ASSOCIATED_SMOOTH_MUSCLE_CELL_MIGRATION	35	0.35706	1.45315	0.188259	0.186024	0.89	4893	tags=57%, list=35%, signal=88%
GOBP_REGULATION_OF_MYELINATION	GOBP_REGULATION_OF_MYELINATION	53	0.31647	1.4528	0.0505263	0.186172	0.89	1923	tags=25%, list=14%, signal=28%
GOBP_REGULATION_OF_PROTEIN_AUTOPHOSPHORYLATION	GOBP_REGULATION_OF_PROTEIN_AUTOPHOSPHORYLATION	43	0.317719	1.45224	0.119588	0.18646	0.891	6933	tags=67%, list=50%, signal=134%
GOBP_THYMIC_T_CELL_SELECTION	GOBP_THYMIC_T_CELL_SELECTION	25	0.371142	1.45145	0.0489796	0.186883	0.894	2379	tags=28%, list=17%, signal=34%
GOBP_NEGATIVE_REGULATION_OF_FAT_CELL_DIFFERENTIATION	GOBP_NEGATIVE_REGULATION_OF_FAT_CELL_DIFFERENTIATION	58	0.304819	1.4502	0.196653	0.187588	0.894	3160	tags=33%, list=23%, signal=42%
GOBP_REGULATION_OF_PLASMA_LIPOPROTEIN_PARTICLE_LEVELS	GOBP_REGULATION_OF_PLASMA_LIPOPROTEIN_PARTICLE_LEVELS	51	0.286141	1.45019	0.11691	0.187464	0.894	6076	tags=57%, list=44%, signal=100%
GOBP_POSITIVE_REGULATION_OF_PROTEIN_TYROSINE_KINASE_ACTIVITY	GOBP_POSITIVE_REGULATION_OF_PROTEIN_TYROSINE_KINASE_ACTIVITY	42	0.344155	1.44948	0.147177	0.1878	0.895	3026	tags=33%, list=22%, signal=42%
GOBP_RESPONSE_TO_OXIDATIVE_STRESS	GOBP_RESPONSE_TO_OXIDATIVE_STRESS	360	0.293465	1.44938	0.0125261	0.187746	0.895	7601	tags=71%, list=55%, signal=152%
GOBP_POSITIVE_REGULATION_OF_CELL_DIVISION	GOBP_POSITIVE_REGULATION_OF_CELL_DIVISION	65	0.320081	1.44899	0.186975	0.187876	0.895	3709	tags=35%, list=27%, signal=48%
GOBP_APOPTOTIC_MITOCHONDRIAL_CHANGES	GOBP_APOPTOTIC_MITOCHONDRIAL_CHANGES	111	0.336046	1.44842	0.0541667	0.188183	0.896	5323	tags=59%, list=38%, signal=94%
GOBP_CARDIAC_MUSCLE_CONTRACTION	GOBP_CARDIAC_MUSCLE_CONTRACTION	109	0.287174	1.4484	0.108216	0.188065	0.896	3527	tags=36%, list=25%, signal=48%
GOBP_NEGATIVE_REGULATION_OF_ESTABLISHMENT_OF_PROTEIN_LOCALIZATION	GOBP_NEGATIVE_REGULATION_OF_ESTABLISHMENT_OF_PROTEIN_LOCALIZATION	129	0.259886	1.44811	0.049896	0.188135	0.896	5999	tags=53%, list=43%, signal=93%
GOBP_REGULATION_OF_CYSTEINE_TYPE_ENDOPEPTIDASE_ACTIVITY_INVOLVED_IN_APOPTOTIC_SIGNALING_PATHWAY	GOBP_REGULATION_OF_CYSTEINE_TYPE_ENDOPEPTIDASE_ACTIVITY_INVOLVED_IN_APOPTOTIC_SIGNALING_PATHWAY	15	0.427048	1.44795	0.1417	0.188131	0.896	7062	tags=80%, list=51%, signal=162%
GOBP_NEGATIVE_REGULATION_OF_VOLTAGE_GATED_CALCIUM_CHANNEL_ACTIVITY	GOBP_NEGATIVE_REGULATION_OF_VOLTAGE_GATED_CALCIUM_CHANNEL_ACTIVITY	15	0.43984	1.44787	0.104294	0.188049	0.896	4045	tags=60%, list=29%, signal=84%
GOBP_CARBOHYDRATE_METABOLIC_PROCESS	GOBP_CARBOHYDRATE_METABOLIC_PROCESS	490	0.261526	1.44775	0.0524109	0.188009	0.896	6111	tags=53%, list=44%, signal=92%
GOBP_SEMAPHORIN_PLEXIN_SIGNALING_PATHWAY	GOBP_SEMAPHORIN_PLEXIN_SIGNALING_PATHWAY	44	0.419046	1.44748	0.219149	0.188058	0.896	3396	tags=43%, list=24%, signal=57%
GOBP_NEUROTRANSMITTER_SECRETION	GOBP_NEUROTRANSMITTER_SECRETION	121	0.23432	1.44691	0.113772	0.188333	0.898	3252	tags=29%, list=23%, signal=37%
GOBP_PROTEIN_N_LINKED_GLYCOSYLATION	GOBP_PROTEIN_N_LINKED_GLYCOSYLATION	55	0.397608	1.44664	0.129098	0.188395	0.898	5268	tags=69%, list=38%, signal=111%
GOBP_ENDODERM_DEVELOPMENT	GOBP_ENDODERM_DEVELOPMENT	53	0.328567	1.4465	0.219917	0.188382	0.898	1144	tags=17%, list=8%, signal=18%
GOBP_POSITIVE_REGULATION_OF_NEURON_DEATH	GOBP_POSITIVE_REGULATION_OF_NEURON_DEATH	116	0.286962	1.44548	0.173278	0.188931	0.9	2519	tags=26%, list=18%, signal=31%
GOBP_PURINE_RIBONUCLEOTIDE_SALVAGE	GOBP_PURINE_RIBONUCLEOTIDE_SALVAGE	16	0.50867	1.44493	0.133745	0.189144	0.9	5682	tags=88%, list=41%, signal=148%
GOBP_SCHWANN_CELL_DEVELOPMENT	GOBP_SCHWANN_CELL_DEVELOPMENT	35	0.326695	1.44464	0.101031	0.189212	0.9	1683	tags=26%, list=12%, signal=29%
GOBP_MYELOID_CELL_DEVELOPMENT	GOBP_MYELOID_CELL_DEVELOPMENT	81	0.301173	1.44402	0.14557	0.189496	0.9	4016	tags=37%, list=29%, signal=52%
GOBP_EAR_MORPHOGENESIS	GOBP_EAR_MORPHOGENESIS	100	0.320791	1.44385	0.236515	0.189459	0.9	1834	tags=21%, list=13%, signal=24%
GOBP_REGULATION_OF_WNT_SIGNALING_PATHWAY_PLANAR_CELL_POLARITY_PATHWAY	GOBP_REGULATION_OF_WNT_SIGNALING_PATHWAY_PLANAR_CELL_POLARITY_PATHWAY	15	0.532053	1.44385	0.133333	0.189334	0.9	1139	tags=33%, list=8%, signal=36%
GOBP_ESTABLISHMENT_OF_PROTEIN_LOCALIZATION_TO_ENDOPLASMIC_RETICULUM	GOBP_ESTABLISHMENT_OF_PROTEIN_LOCALIZATION_TO_ENDOPLASMIC_RETICULUM	46	0.428974	1.44364	0.0354331	0.189359	0.9	7522	tags=93%, list=54%, signal=203%
GOBP_SIGNAL_PEPTIDE_PROCESSING	GOBP_SIGNAL_PEPTIDE_PROCESSING	15	0.544109	1.44363	0.13834	0.18923	0.9	4649	tags=80%, list=33%, signal=120%
GOBP_CELLULAR_RESPONSE_TO_CALCIUM_ION	GOBP_CELLULAR_RESPONSE_TO_CALCIUM_ION	64	0.292841	1.4432	0.173913	0.189384	0.9	3650	tags=36%, list=26%, signal=48%
GOBP_REGULATION_OF_MORPHOGENESIS_OF_A_BRANCHING_STRUCTURE	GOBP_REGULATION_OF_MORPHOGENESIS_OF_A_BRANCHING_STRUCTURE	55	0.315523	1.44284	0.148148	0.189508	0.9	2285	tags=25%, list=16%, signal=30%
GOBP_POSITIVE_REGULATION_OF_BEHAVIOR	GOBP_POSITIVE_REGULATION_OF_BEHAVIOR	19	0.327337	1.44247	0.0609756	0.189607	0.9	1731	tags=26%, list=12%, signal=30%
GOBP_NEGATIVE_REGULATION_OF_ORGANIC_ACID_TRANSPORT	GOBP_NEGATIVE_REGULATION_OF_ORGANIC_ACID_TRANSPORT	21	0.435049	1.4424	0.101833	0.189554	0.9	2677	tags=38%, list=19%, signal=47%
GOBP_LUNG_MORPHOGENESIS	GOBP_LUNG_MORPHOGENESIS	56	0.304072	1.44213	0.0868687	0.189672	0.903	5297	tags=45%, list=38%, signal=72%
GOBP_POSITIVE_REGULATION_OF_LYMPHOCYTE_APOPTOTIC_PROCESS	GOBP_POSITIVE_REGULATION_OF_LYMPHOCYTE_APOPTOTIC_PROCESS	18	0.406395	1.44207	0.107066	0.189576	0.903	5323	tags=50%, list=38%, signal=81%
GOBP_TRANSFORMING_GROWTH_FACTOR_BETA_RECEPTOR_SIGNALING_PATHWAY	GOBP_TRANSFORMING_GROWTH_FACTOR_BETA_RECEPTOR_SIGNALING_PATHWAY	186	0.270746	1.44183	0.134172	0.189607	0.903	3529	tags=33%, list=25%, signal=44%
GOBP_CARDIAC_CHAMBER_DEVELOPMENT	GOBP_CARDIAC_CHAMBER_DEVELOPMENT	160	0.273924	1.44178	0.226891	0.189506	0.903	2838	tags=26%, list=20%, signal=32%
GOBP_LIVER_MORPHOGENESIS	GOBP_LIVER_MORPHOGENESIS	28	0.362066	1.44149	0.179012	0.189586	0.903	2523	tags=32%, list=18%, signal=39%
GOBP_OUTFLOW_TRACT_MORPHOGENESIS	GOBP_OUTFLOW_TRACT_MORPHOGENESIS	78	0.328269	1.44132	0.202479	0.189577	0.903	3529	tags=33%, list=25%, signal=44%
GOBP_REGULATION_OF_LYSOSOMAL_LUMEN_PH	GOBP_REGULATION_OF_LYSOSOMAL_LUMEN_PH	20	0.439103	1.44026	0.0684932	0.190144	0.903	7814	tags=95%, list=56%, signal=216%
GOBP_LYTIC_VACUOLE_ORGANIZATION	GOBP_LYTIC_VACUOLE_ORGANIZATION	86	0.331687	1.44002	0.0474227	0.190192	0.903	7861	tags=80%, list=56%, signal=183%
GOBP_REGULATION_OF_ADENYLATE_CYCLASE_ACTIVITY	GOBP_REGULATION_OF_ADENYLATE_CYCLASE_ACTIVITY	28	0.3671	1.43998	0.131417	0.190088	0.903	6128	tags=57%, list=44%, signal=102%
GOBP_PROTEIN_COMPLEX_OLIGOMERIZATION	GOBP_PROTEIN_COMPLEX_OLIGOMERIZATION	203	0.235974	1.43986	0.0515464	0.190049	0.903	5533	tags=46%, list=40%, signal=75%
GOBP_PROSTATE_GLAND_DEVELOPMENT	GOBP_PROSTATE_GLAND_DEVELOPMENT	44	0.35529	1.43955	0.0939457	0.190122	0.903	1588	tags=20%, list=11%, signal=23%
GOBP_REGULATION_OF_SODIUM_ION_TRANSMEMBRANE_TRANSPORTER_ACTIVITY	GOBP_REGULATION_OF_SODIUM_ION_TRANSMEMBRANE_TRANSPORTER_ACTIVITY	49	0.29735	1.43866	0.157685	0.190625	0.903	5330	tags=53%, list=38%, signal=86%
GOBP_AMYLOID_FIBRIL_FORMATION	GOBP_AMYLOID_FIBRIL_FORMATION	26	0.382825	1.43804	0.0689655	0.190875	0.903	6785	tags=81%, list=49%, signal=157%
GOBP_POSITIVE_REGULATION_OF_STRESS_ACTIVATED_PROTEIN_KINASE_SIGNALING_CASCADE	GOBP_POSITIVE_REGULATION_OF_STRESS_ACTIVATED_PROTEIN_KINASE_SIGNALING_CASCADE	116	0.269858	1.43701	0.244856	0.191471	0.903	2899	tags=27%, list=21%, signal=33%
GOBP_PROTEIN_LOCALIZATION_TO_EXTRACELLULAR_REGION	GOBP_PROTEIN_LOCALIZATION_TO_EXTRACELLULAR_REGION	337	0.240168	1.43696	0.0862423	0.191382	0.903	4596	tags=37%, list=33%, signal=54%
GOBP_CELLULAR_RESPONSE_TO_OXIDATIVE_STRESS	GOBP_CELLULAR_RESPONSE_TO_OXIDATIVE_STRESS	247	0.292834	1.43683	0.0208333	0.191312	0.903	7598	tags=70%, list=55%, signal=152%
GOBP_REGULATION_OF_CELL_SIZE	GOBP_REGULATION_OF_CELL_SIZE	189	0.255485	1.43569	0.188912	0.192074	0.904	3979	tags=35%, list=29%, signal=48%
GOBP_RESPONSE_TO_ACID_CHEMICAL	GOBP_RESPONSE_TO_ACID_CHEMICAL	87	0.30189	1.43474	0.0861345	0.192579	0.905	4461	tags=45%, list=32%, signal=66%
GOBP_METANEPHROS_DEVELOPMENT	GOBP_METANEPHROS_DEVELOPMENT	70	0.328974	1.43441	0.190184	0.192663	0.905	1948	tags=23%, list=14%, signal=26%
GOBP_REGULATION_OF_PROTEIN_SECRETION	GOBP_REGULATION_OF_PROTEIN_SECRETION	259	0.237381	1.43437	0.123203	0.192566	0.905	3829	tags=31%, list=27%, signal=42%
GOBP_NEGATIVE_REGULATION_OF_PROTEIN_MATURATION	GOBP_NEGATIVE_REGULATION_OF_PROTEIN_MATURATION	24	0.417486	1.43431	0.168085	0.192484	0.905	3714	tags=50%, list=27%, signal=68%
GOBP_REGULATION_OF_LYMPHOCYTE_APOPTOTIC_PROCESS	GOBP_REGULATION_OF_LYMPHOCYTE_APOPTOTIC_PROCESS	60	0.330835	1.43376	0.140756	0.192703	0.905	4816	tags=45%, list=35%, signal=68%
GOBP_REGULATION_OF_MITOCHONDRION_ORGANIZATION	GOBP_REGULATION_OF_MITOCHONDRION_ORGANIZATION	134	0.31833	1.43308	0.0125261	0.193075	0.905	6425	tags=64%, list=46%, signal=118%
GOBP_RESPONSE_TO_DEXAMETHASONE	GOBP_RESPONSE_TO_DEXAMETHASONE	27	0.351848	1.43302	0.111789	0.192998	0.905	4512	tags=48%, list=32%, signal=71%
GOBP_RECEPTOR_RECYCLING	GOBP_RECEPTOR_RECYCLING	49	0.326439	1.4321	0.0083682	0.193502	0.905	5750	tags=59%, list=41%, signal=100%
GOBP_POSITIVE_REGULATION_OF_MORPHOGENESIS_OF_AN_EPITHELIUM	GOBP_POSITIVE_REGULATION_OF_MORPHOGENESIS_OF_AN_EPITHELIUM	34	0.3917	1.43193	0.115304	0.193476	0.905	1988	tags=29%, list=14%, signal=34%
GOBP_UROGENITAL_SYSTEM_DEVELOPMENT	GOBP_UROGENITAL_SYSTEM_DEVELOPMENT	55	0.345912	1.43162	0.129237	0.193558	0.905	1588	tags=20%, list=11%, signal=22%
GOBP_RESPONSE_TO_CALCIUM_ION	GOBP_RESPONSE_TO_CALCIUM_ION	111	0.24639	1.43092	0.137421	0.193858	0.905	3790	tags=36%, list=27%, signal=49%
GOBP_CONNECTIVE_TISSUE_DEVELOPMENT	GOBP_CONNECTIVE_TISSUE_DEVELOPMENT	243	0.254909	1.43083	0.252567	0.193782	0.905	2479	tags=22%, list=18%, signal=26%
GOBP_RESPONSE_TO_OXYGEN_LEVELS	GOBP_RESPONSE_TO_OXYGEN_LEVELS	220	0.274163	1.43066	0.0461216	0.193769	0.905	4114	tags=38%, list=30%, signal=53%
GOBP_NEGATIVE_REGULATION_OF_DEVELOPMENTAL_GROWTH	GOBP_NEGATIVE_REGULATION_OF_DEVELOPMENTAL_GROWTH	119	0.285323	1.42977	0.223382	0.194215	0.909	3133	tags=27%, list=22%, signal=34%
GOBP_FOREBRAIN_NEURON_DIFFERENTIATION	GOBP_FOREBRAIN_NEURON_DIFFERENTIATION	35	0.3607	1.42952	0.164927	0.194255	0.909	1468	tags=20%, list=11%, signal=22%
GOBP_AMINO_ACID_TRANSPORT	GOBP_AMINO_ACID_TRANSPORT	120	0.276462	1.42951	0.0611814	0.194131	0.909	3310	tags=32%, list=24%, signal=41%
GOBP_EPITHELIAL_CELL_APOPTOTIC_PROCESS	GOBP_EPITHELIAL_CELL_APOPTOTIC_PROCESS	118	0.289839	1.42931	0.151261	0.194134	0.909	4882	tags=46%, list=35%, signal=70%
GOBP_CELL_CELL_JUNCTION_ORGANIZATION	GOBP_CELL_CELL_JUNCTION_ORGANIZATION	180	0.2718	1.4291	0.216495	0.194138	0.909	3744	tags=34%, list=27%, signal=46%
GOBP_BONE_DEVELOPMENT	GOBP_BONE_DEVELOPMENT	218	0.270576	1.42886	0.257928	0.194192	0.909	1594	tags=18%, list=11%, signal=20%
GOBP_REGULATION_OF_PROTEIN_BINDING	GOBP_REGULATION_OF_PROTEIN_BINDING	201	0.268356	1.42815	0.114345	0.194562	0.909	6542	tags=57%, list=47%, signal=105%
GOBP_REGULATION_OF_ARP2_3_COMPLEX_MEDIATED_ACTIN_NUCLEATION	GOBP_REGULATION_OF_ARP2_3_COMPLEX_MEDIATED_ACTIN_NUCLEATION	25	0.349538	1.42735	0.0384615	0.194948	0.909	4406	tags=48%, list=32%, signal=70%
GOBP_REGULATION_OF_HETEROTYPIC_CELL_CELL_ADHESION	GOBP_REGULATION_OF_HETEROTYPIC_CELL_CELL_ADHESION	16	0.423828	1.42704	0.153191	0.195044	0.909	3025	tags=50%, list=22%, signal=64%
GOBP_CELLULAR_RESPONSE_TO_LIPOPROTEIN_PARTICLE_STIMULUS	GOBP_CELLULAR_RESPONSE_TO_LIPOPROTEIN_PARTICLE_STIMULUS	33	0.38457	1.42694	0.11976	0.19499	0.909	3901	tags=48%, list=28%, signal=67%
GOBP_REGULATION_OF_MUSCLE_CELL_DIFFERENTIATION	GOBP_REGULATION_OF_MUSCLE_CELL_DIFFERENTIATION	144	0.272397	1.42647	0.141079	0.195203	0.909	3151	tags=29%, list=23%, signal=37%
GOBP_REGULATION_OF_CELL_SUBSTRATE_JUNCTION_ORGANIZATION	GOBP_REGULATION_OF_CELL_SUBSTRATE_JUNCTION_ORGANIZATION	69	0.351131	1.42579	0.123203	0.195564	0.911	3570	tags=42%, list=26%, signal=56%
GOBP_FATTY_ACID_TRANSPORT	GOBP_FATTY_ACID_TRANSPORT	78	0.280457	1.42546	0.0824742	0.19568	0.911	3790	tags=36%, list=27%, signal=49%
GOBP_NEGATIVE_REGULATION_OF_CD4_POSITIVE_ALPHA_BETA_T_CELL_ACTIVATION	GOBP_NEGATIVE_REGULATION_OF_CD4_POSITIVE_ALPHA_BETA_T_CELL_ACTIVATION	28	0.395662	1.42505	0.141328	0.195839	0.911	3132	tags=39%, list=22%, signal=51%
GOBP_METANEPHRIC_NEPHRON_DEVELOPMENT	GOBP_METANEPHRIC_NEPHRON_DEVELOPMENT	28	0.390881	1.42498	0.128631	0.195745	0.911	1615	tags=25%, list=12%, signal=28%
GOBP_POSITIVE_REGULATION_OF_MITOTIC_NUCLEAR_DIVISION	GOBP_POSITIVE_REGULATION_OF_MITOTIC_NUCLEAR_DIVISION	37	0.296039	1.42486	0.128049	0.195703	0.911	4581	tags=43%, list=33%, signal=64%
GOBP_NEGATIVE_REGULATION_OF_NECROTIC_CELL_DEATH	GOBP_NEGATIVE_REGULATION_OF_NECROTIC_CELL_DEATH	24	0.362998	1.42432	0.0446247	0.195943	0.913	7381	tags=83%, list=53%, signal=177%
GOBP_RESPONSE_TO_ATP	GOBP_RESPONSE_TO_ATP	28	0.356679	1.42359	0.11946	0.196281	0.914	1481	tags=25%, list=11%, signal=28%
GOBP_POSITIVE_REGULATION_OF_SYSTEMIC_ARTERIAL_BLOOD_PRESSURE	GOBP_POSITIVE_REGULATION_OF_SYSTEMIC_ARTERIAL_BLOOD_PRESSURE	17	0.466299	1.42316	0.138067	0.196474	0.914	1030	tags=29%, list=7%, signal=32%
GOBP_REGULATION_OF_PROTEIN_TARGETING	GOBP_REGULATION_OF_PROTEIN_TARGETING	47	0.349857	1.42269	0.0209644	0.196692	0.914	6408	tags=68%, list=46%, signal=126%
GOBP_CELL_COMMUNICATION_INVOLVED_IN_CARDIAC_CONDUCTION	GOBP_CELL_COMMUNICATION_INVOLVED_IN_CARDIAC_CONDUCTION	37	0.378095	1.42224	0.130522	0.19689	0.914	3094	tags=38%, list=22%, signal=49%
GOBP_RESPONSE_TO_GROWTH_HORMONE	GOBP_RESPONSE_TO_GROWTH_HORMONE	16	0.448321	1.42163	0.00617284	0.197193	0.914	6753	tags=81%, list=48%, signal=157%
GOBP_LIPOPROTEIN_LOCALIZATION	GOBP_LIPOPROTEIN_LOCALIZATION	17	0.401379	1.42128	0.0921569	0.197299	0.914	3297	tags=41%, list=24%, signal=54%
GOBP_REGULATION_OF_CALCIUM_ION_DEPENDENT_EXOCYTOSIS	GOBP_REGULATION_OF_CALCIUM_ION_DEPENDENT_EXOCYTOSIS	34	0.3739	1.42083	0.16632	0.197437	0.914	4219	tags=44%, list=30%, signal=63%
GOBP_REGULATION_OF_ODONTOGENESIS	GOBP_REGULATION_OF_ODONTOGENESIS	17	0.476065	1.42079	0.160825	0.197333	0.914	2083	tags=29%, list=15%, signal=35%
GOBP_CARBOHYDRATE_TRANSPORT	GOBP_CARBOHYDRATE_TRANSPORT	127	0.281084	1.42078	0.0794979	0.197208	0.914	5505	tags=50%, list=40%, signal=83%
GOBP_NEGATIVE_REGULATION_OF_HOMOTYPIC_CELL_CELL_ADHESION	GOBP_NEGATIVE_REGULATION_OF_HOMOTYPIC_CELL_CELL_ADHESION	18	0.402969	1.42032	0.169772	0.197426	0.914	2437	tags=39%, list=17%, signal=47%
GOBP_PEPTIDYL_PROLINE_MODIFICATION	GOBP_PEPTIDYL_PROLINE_MODIFICATION	39	0.323449	1.4202	0.125523	0.197383	0.914	6931	tags=69%, list=50%, signal=137%
GOBP_REGULATION_OF_SMOOTH_MUSCLE_CELL_DIFFERENTIATION	GOBP_REGULATION_OF_SMOOTH_MUSCLE_CELL_DIFFERENTIATION	30	0.351127	1.42	0.190184	0.197397	0.914	4486	tags=47%, list=32%, signal=69%
GOBP_CELL_DEATH_IN_RESPONSE_TO_OXIDATIVE_STRESS	GOBP_CELL_DEATH_IN_RESPONSE_TO_OXIDATIVE_STRESS	90	0.299794	1.41963	0.0517598	0.197537	0.914	7332	tags=70%, list=53%, signal=147%
GOBP_POSITIVE_REGULATION_OF_FIBROBLAST_PROLIFERATION	GOBP_POSITIVE_REGULATION_OF_FIBROBLAST_PROLIFERATION	69	0.291115	1.41926	0.223629	0.197684	0.914	3789	tags=35%, list=27%, signal=48%
GOBP_REGULATION_OF_OSSIFICATION	GOBP_REGULATION_OF_OSSIFICATION	116	0.276859	1.41924	0.228283	0.197562	0.914	2114	tags=22%, list=15%, signal=25%
GOBP_VACUOLAR_ACIDIFICATION	GOBP_VACUOLAR_ACIDIFICATION	25	0.408742	1.41856	0.0567515	0.197888	0.918	6790	tags=84%, list=49%, signal=164%
GOBP_CALCIUM_ION_TRANSPORT_INTO_CYTOSOL	GOBP_CALCIUM_ION_TRANSPORT_INTO_CYTOSOL	23	0.384561	1.41715	0.118609	0.198742	0.922	3790	tags=43%, list=27%, signal=60%
GOBP_GLAND_MORPHOGENESIS	GOBP_GLAND_MORPHOGENESIS	130	0.310066	1.41715	0.251586	0.198613	0.922	2523	tags=25%, list=18%, signal=31%
GOBP_REGULATION_OF_ENDOCYTIC_RECYCLING	GOBP_REGULATION_OF_ENDOCYTIC_RECYCLING	19	0.356053	1.4152	0.0731183	0.199899	0.923	2957	tags=42%, list=21%, signal=53%
GOBP_PROTEIN_KINASE_C_ACTIVATING_G_PROTEIN_COUPLED_RECEPTOR_SIGNALING_PATHWAY	GOBP_PROTEIN_KINASE_C_ACTIVATING_G_PROTEIN_COUPLED_RECEPTOR_SIGNALING_PATHWAY	18	0.42749	1.41514	0.109756	0.199826	0.923	3396	tags=44%, list=24%, signal=59%
GOBP_PROTEIN_POLYMERIZATION	GOBP_PROTEIN_POLYMERIZATION	253	0.267817	1.41436	0.157025	0.2002	0.923	4447	tags=40%, list=32%, signal=58%
GOBP_REGULATION_OF_SYNAPTIC_VESICLE_ENDOCYTOSIS	GOBP_REGULATION_OF_SYNAPTIC_VESICLE_ENDOCYTOSIS	25	0.39753	1.41385	0.10124	0.200418	0.924	3982	tags=52%, list=29%, signal=73%
GOBP_REGULATION_OF_NEURON_MIGRATION	GOBP_REGULATION_OF_NEURON_MIGRATION	44	0.352231	1.41345	0.205285	0.200594	0.924	2085	tags=27%, list=15%, signal=32%
GOBP_CELLULAR_RESPONSE_TO_INORGANIC_SUBSTANCE	GOBP_CELLULAR_RESPONSE_TO_INORGANIC_SUBSTANCE	151	0.253995	1.41281	0.126294	0.200941	0.926	3650	tags=34%, list=26%, signal=46%
GOBP_RESPONSE_TO_DECREASED_OXYGEN_LEVELS	GOBP_RESPONSE_TO_DECREASED_OXYGEN_LEVELS	202	0.267984	1.41277	0.0440252	0.200832	0.926	3086	tags=30%, list=22%, signal=38%
GOBP_CLATHRIN_COAT_ASSEMBLY	GOBP_CLATHRIN_COAT_ASSEMBLY	15	0.482329	1.41269	0.0491803	0.200792	0.926	6238	tags=80%, list=45%, signal=145%
GOBP_REGULATION_OF_CELL_MORPHOGENESIS	GOBP_REGULATION_OF_CELL_MORPHOGENESIS	251	0.255799	1.4111	0.249485	0.20174	0.926	3764	tags=32%, list=27%, signal=43%
GOBP_LIPID_EXPORT_FROM_CELL	GOBP_LIPID_EXPORT_FROM_CELL	44	0.302538	1.4109	0.102296	0.201747	0.926	1481	tags=20%, list=11%, signal=23%
GOBP_ORGANELLE_MEMBRANE_FUSION	GOBP_ORGANELLE_MEMBRANE_FUSION	109	0.300261	1.41068	0.0227743	0.201782	0.926	7106	tags=68%, list=51%, signal=137%
GOBP_POSITIVE_REGULATION_OF_ERAD_PATHWAY	GOBP_POSITIVE_REGULATION_OF_ERAD_PATHWAY	18	0.400105	1.41051	0.0484848	0.201786	0.926	7155	tags=83%, list=51%, signal=171%
GOBP_GLUTAMINE_FAMILY_AMINO_ACID_METABOLIC_PROCESS	GOBP_GLUTAMINE_FAMILY_AMINO_ACID_METABOLIC_PROCESS	55	0.348011	1.41045	0.162447	0.201696	0.926	5869	tags=60%, list=42%, signal=103%
GOBP_REGULATION_OF_STRESS_ACTIVATED_PROTEIN_KINASE_SIGNALING_CASCADE	GOBP_REGULATION_OF_STRESS_ACTIVATED_PROTEIN_KINASE_SIGNALING_CASCADE	183	0.252809	1.41023	0.180498	0.201728	0.926	4812	tags=39%, list=35%, signal=59%
GOBP_POSITIVE_REGULATION_OF_CELLULAR_RESPONSE_TO_TRANSFORMING_GROWTH_FACTOR_BETA_STIMULUS	GOBP_POSITIVE_REGULATION_OF_CELLULAR_RESPONSE_TO_TRANSFORMING_GROWTH_FACTOR_BETA_STIMULUS	31	0.367903	1.41022	0.143737	0.201603	0.926	3529	tags=42%, list=25%, signal=56%
GOBP_NEGATIVE_REGULATION_OF_REPRODUCTIVE_PROCESS	GOBP_NEGATIVE_REGULATION_OF_REPRODUCTIVE_PROCESS	50	0.285363	1.40992	0.122807	0.201742	0.926	2616	tags=26%, list=19%, signal=32%
GOBP_T_HELPER_17_TYPE_IMMUNE_RESPONSE	GOBP_T_HELPER_17_TYPE_IMMUNE_RESPONSE	34	0.366938	1.40966	0.172269	0.201784	0.926	4466	tags=44%, list=32%, signal=65%
GOBP_DETECTION_OF_MECHANICAL_STIMULUS_INVOLVED_IN_SENSORY_PERCEPTION	GOBP_DETECTION_OF_MECHANICAL_STIMULUS_INVOLVED_IN_SENSORY_PERCEPTION	29	0.385832	1.40965	0.120083	0.20166	0.926	2437	tags=34%, list=17%, signal=42%
GOBP_ACTIN_FILAMENT_SEVERING	GOBP_ACTIN_FILAMENT_SEVERING	16	0.396048	1.40919	0.085595	0.201863	0.928	4349	tags=56%, list=31%, signal=82%
GOBP_DOPAMINE_METABOLIC_PROCESS	GOBP_DOPAMINE_METABOLIC_PROCESS	31	0.38267	1.40884	0.153846	0.201984	0.928	5561	tags=58%, list=40%, signal=96%
GOBP_RESPONSE_TO_OXYGEN_RADICAL	GOBP_RESPONSE_TO_OXYGEN_RADICAL	22	0.405839	1.40844	0.110879	0.202108	0.928	5377	tags=64%, list=39%, signal=103%
GOBP_ARP2_3_COMPLEX_MEDIATED_ACTIN_NUCLEATION	GOBP_ARP2_3_COMPLEX_MEDIATED_ACTIN_NUCLEATION	38	0.372417	1.40751	0.028866	0.202646	0.928	4419	tags=53%, list=32%, signal=77%
GOBP_STRIATED_MUSCLE_CONTRACTION	GOBP_STRIATED_MUSCLE_CONTRACTION	148	0.291499	1.40704	0.198381	0.202823	0.928	6131	tags=57%, list=44%, signal=101%
GOBP_REGULATION_OF_PROTEIN_LOCALIZATION_TO_PLASMA_MEMBRANE	GOBP_REGULATION_OF_PROTEIN_LOCALIZATION_TO_PLASMA_MEMBRANE	105	0.317266	1.40693	0.0273684	0.202785	0.93	6483	tags=64%, list=47%, signal=118%
GOBP_OLFACTORY_LOBE_DEVELOPMENT	GOBP_OLFACTORY_LOBE_DEVELOPMENT	33	0.350371	1.40674	0.192797	0.202778	0.93	1742	tags=21%, list=13%, signal=24%
GOBP_REGULATION_OF_PROTEIN_TARGETING_TO_MEMBRANE	GOBP_REGULATION_OF_PROTEIN_TARGETING_TO_MEMBRANE	31	0.354657	1.40569	0.0748441	0.203471	0.931	6211	tags=65%, list=45%, signal=116%
GOBP_POSITIVE_REGULATION_OF_PROTEIN_SECRETION	GOBP_POSITIVE_REGULATION_OF_PROTEIN_SECRETION	147	0.262888	1.40495	0.0927835	0.203893	0.934	6628	tags=56%, list=48%, signal=105%
GOBP_REGULATION_OF_RESPIRATORY_GASEOUS_EXCHANGE	GOBP_REGULATION_OF_RESPIRATORY_GASEOUS_EXCHANGE	15	0.408556	1.40437	0.0981964	0.204148	0.934	1621	tags=27%, list=12%, signal=30%
GOBP_PLASMA_MEMBRANE_ORGANIZATION	GOBP_PLASMA_MEMBRANE_ORGANIZATION	134	0.254387	1.40428	0.12395	0.204083	0.934	3462	tags=33%, list=25%, signal=43%
GOBP_STRIATED_MUSCLE_CELL_APOPTOTIC_PROCESS	GOBP_STRIATED_MUSCLE_CELL_APOPTOTIC_PROCESS	61	0.333032	1.40369	0.0810811	0.20438	0.936	7517	tags=77%, list=54%, signal=167%
GOBP_REGULATION_OF_INSULIN_LIKE_GROWTH_FACTOR_RECEPTOR_SIGNALING_PATHWAY	GOBP_REGULATION_OF_INSULIN_LIKE_GROWTH_FACTOR_RECEPTOR_SIGNALING_PATHWAY	19	0.38686	1.40271	0.0826446	0.204906	0.938	2846	tags=37%, list=20%, signal=46%
GOBP_PHAGOLYSOSOME_ASSEMBLY	GOBP_PHAGOLYSOSOME_ASSEMBLY	16	0.3957	1.40262	0.106	0.204863	0.938	6339	tags=75%, list=45%, signal=137%
GOBP_NEGATIVE_REGULATION_OF_EPITHELIAL_CELL_PROLIFERATION	GOBP_NEGATIVE_REGULATION_OF_EPITHELIAL_CELL_PROLIFERATION	143	0.264626	1.4024	0.0588235	0.204891	0.938	3754	tags=34%, list=27%, signal=46%
GOBP_CELLULAR_OXIDANT_DETOXIFICATION	GOBP_CELLULAR_OXIDANT_DETOXIFICATION	26	0.41276	1.40182	0.0737705	0.205167	0.938	7332	tags=88%, list=53%, signal=186%
GOBP_REGULATION_OF_BONE_MINERALIZATION	GOBP_REGULATION_OF_BONE_MINERALIZATION	73	0.30033	1.40155	0.153684	0.205214	0.938	2114	tags=23%, list=15%, signal=27%
GOBP_REGULATION_OF_ALCOHOL_BIOSYNTHETIC_PROCESS	GOBP_REGULATION_OF_ALCOHOL_BIOSYNTHETIC_PROCESS	41	0.348195	1.40143	0.10883	0.205165	0.938	3381	tags=34%, list=24%, signal=45%
GOBP_REGULATION_OF_NECROTIC_CELL_DEATH	GOBP_REGULATION_OF_NECROTIC_CELL_DEATH	40	0.316799	1.40103	0.0612245	0.2053	0.938	3289	tags=40%, list=24%, signal=52%
GOBP_ACTIN_NUCLEATION	GOBP_ACTIN_NUCLEATION	49	0.350857	1.40055	0.0390144	0.205592	0.939	4447	tags=49%, list=32%, signal=72%
GOBP_NEGATIVE_REGULATION_OF_RESPONSE_TO_CYTOKINE_STIMULUS	GOBP_NEGATIVE_REGULATION_OF_RESPONSE_TO_CYTOKINE_STIMULUS	66	0.303592	1.40007	0.0977597	0.205772	0.939	3894	tags=36%, list=28%, signal=50%
GOBP_POSTSYNAPTIC_MEMBRANE_ORGANIZATION	GOBP_POSTSYNAPTIC_MEMBRANE_ORGANIZATION	43	0.34421	1.3999	0.175983	0.205761	0.939	2627	tags=33%, list=19%, signal=40%
GOBP_REGULATION_OF_BINDING	GOBP_REGULATION_OF_BINDING	368	0.245778	1.39937	0.162162	0.206015	0.942	4560	tags=39%, list=33%, signal=56%
GOBP_AUTONOMIC_NERVOUS_SYSTEM_DEVELOPMENT	GOBP_AUTONOMIC_NERVOUS_SYSTEM_DEVELOPMENT	37	0.402222	1.39919	0.191753	0.206012	0.942	1730	tags=24%, list=12%, signal=28%
GOBP_REGULATION_OF_SODIUM_ION_TRANSMEMBRANE_TRANSPORT	GOBP_REGULATION_OF_SODIUM_ION_TRANSMEMBRANE_TRANSPORT	59	0.276191	1.39863	0.166667	0.206297	0.942	5764	tags=54%, list=41%, signal=92%
GOBP_LUNG_ALVEOLUS_DEVELOPMENT	GOBP_LUNG_ALVEOLUS_DEVELOPMENT	58	0.292772	1.39824	0.166667	0.206451	0.942	2105	tags=24%, list=15%, signal=28%
GOBP_POSITIVE_REGULATION_OF_NEUROTRANSMITTER_TRANSPORT	GOBP_POSITIVE_REGULATION_OF_NEUROTRANSMITTER_TRANSPORT	17	0.357488	1.39784	0.0719844	0.206614	0.942	3155	tags=35%, list=23%, signal=46%
GOBP_CARBOHYDRATE_CATABOLIC_PROCESS	GOBP_CARBOHYDRATE_CATABOLIC_PROCESS	141	0.300529	1.39716	0.111579	0.206977	0.942	6232	tags=60%, list=45%, signal=108%
GOBP_EPITHELIAL_CELL_CELL_ADHESION	GOBP_EPITHELIAL_CELL_CELL_ADHESION	16	0.431601	1.39712	0.175732	0.206881	0.942	3643	tags=44%, list=26%, signal=59%
GOBP_REGULATION_OF_CELL_GROWTH	GOBP_REGULATION_OF_CELL_GROWTH	395	0.234001	1.39673	0.165272	0.207006	0.942	3761	tags=31%, list=27%, signal=41%
GOBP_OLIGODENDROCYTE_DIFFERENTIATION	GOBP_OLIGODENDROCYTE_DIFFERENTIATION	96	0.252191	1.39667	0.145749	0.206922	0.942	1988	tags=20%, list=14%, signal=23%
GOBP_REGULATION_OF_AMINE_METABOLIC_PROCESS	GOBP_REGULATION_OF_AMINE_METABOLIC_PROCESS	28	0.363062	1.39663	0.157576	0.206812	0.942	6339	tags=64%, list=45%, signal=118%
GOBP_POSITIVE_REGULATION_OF_TRANSMEMBRANE_RECEPTOR_PROTEIN_SERINE_THREONINE_KINASE_SIGNALING_PATHWAY	GOBP_POSITIVE_REGULATION_OF_TRANSMEMBRANE_RECEPTOR_PROTEIN_SERINE_THREONINE_KINASE_SIGNALING_PATHWAY	97	0.269458	1.39659	0.193416	0.206722	0.942	3149	tags=31%, list=23%, signal=40%
GOBP_CELL_GROWTH	GOBP_CELL_GROWTH	477	0.225504	1.39652	0.211934	0.206637	0.942	3825	tags=31%, list=27%, signal=41%
GOBP_WATER_HOMEOSTASIS	GOBP_WATER_HOMEOSTASIS	23	0.378801	1.39647	0.127883	0.206543	0.942	6671	tags=70%, list=48%, signal=133%
GOBP_PEPTIDE_HORMONE_PROCESSING	GOBP_PEPTIDE_HORMONE_PROCESSING	18	0.349839	1.39559	0.102616	0.207112	0.942	5054	tags=61%, list=36%, signal=96%
GOBP_TRANSMISSION_OF_NERVE_IMPULSE	GOBP_TRANSMISSION_OF_NERVE_IMPULSE	55	0.35436	1.39545	0.113772	0.207069	0.942	2905	tags=36%, list=21%, signal=46%
GOBP_REGULATION_OF_PROTEIN_LOCALIZATION_TO_MEMBRANE	GOBP_REGULATION_OF_PROTEIN_LOCALIZATION_TO_MEMBRANE	183	0.287805	1.39497	0.0524109	0.207237	0.942	5865	tags=54%, list=42%, signal=92%
GOBP_ORGANELLE_FUSION	GOBP_ORGANELLE_FUSION	143	0.306079	1.39478	0.03125	0.207232	0.942	8132	tags=78%, list=58%, signal=185%
GOBP_NEGATIVE_REGULATION_OF_ACTIN_FILAMENT_BUNDLE_ASSEMBLY	GOBP_NEGATIVE_REGULATION_OF_ACTIN_FILAMENT_BUNDLE_ASSEMBLY	37	0.361274	1.39454	0.19877	0.207281	0.942	3229	tags=41%, list=23%, signal=53%
GOBP_NEURON_APOPTOTIC_PROCESS	GOBP_NEURON_APOPTOTIC_PROCESS	287	0.234782	1.39437	0.129167	0.207272	0.942	2780	tags=25%, list=20%, signal=31%
GOBP_EXPLORATION_BEHAVIOR	GOBP_EXPLORATION_BEHAVIOR	27	0.354434	1.39351	0.151951	0.207779	0.942	1943	tags=30%, list=14%, signal=34%
GOBP_CELLULAR_COMPONENT_ASSEMBLY_INVOLVED_IN_MORPHOGENESIS	GOBP_CELLULAR_COMPONENT_ASSEMBLY_INVOLVED_IN_MORPHOGENESIS	111	0.273017	1.39331	0.221996	0.207815	0.942	3102	tags=32%, list=22%, signal=41%
GOBP_REGULATION_OF_LONG_TERM_NEURONAL_SYNAPTIC_PLASTICITY	GOBP_REGULATION_OF_LONG_TERM_NEURONAL_SYNAPTIC_PLASTICITY	28	0.342151	1.39256	0.143434	0.208173	0.942	6413	tags=75%, list=46%, signal=139%
GOBP_SPERM_EGG_RECOGNITION	GOBP_SPERM_EGG_RECOGNITION	24	0.403166	1.39188	0.120902	0.20855	0.942	5786	tags=71%, list=42%, signal=121%
GOBP_REGULATION_OF_NERVOUS_SYSTEM_DEVELOPMENT	GOBP_REGULATION_OF_NERVOUS_SYSTEM_DEVELOPMENT	477	0.227248	1.39187	0.270661	0.208426	0.942	2858	tags=24%, list=21%, signal=29%
GOBP_CALCIUM_DEPENDENT_CELL_CELL_ADHESION_VIA_PLASMA_MEMBRANE_CELL_ADHESION_MOLECULES	GOBP_CALCIUM_DEPENDENT_CELL_CELL_ADHESION_VIA_PLASMA_MEMBRANE_CELL_ADHESION_MOLECULES	24	0.41843	1.39165	0.169355	0.208466	0.942	1906	tags=38%, list=14%, signal=43%
GOBP_NEGATIVE_REGULATION_OF_PROTEIN_LOCALIZATION_TO_MEMBRANE	GOBP_NEGATIVE_REGULATION_OF_PROTEIN_LOCALIZATION_TO_MEMBRANE	32	0.388859	1.39137	0.0886076	0.208545	0.942	5828	tags=69%, list=42%, signal=118%
GOBP_AGING	GOBP_AGING	61	0.300866	1.39126	0.0666667	0.208476	0.942	4403	tags=46%, list=32%, signal=67%
GOBP_TISSUE_REGENERATION	GOBP_TISSUE_REGENERATION	54	0.318003	1.39094	0.0712788	0.208598	0.942	5786	tags=56%, list=42%, signal=95%
GOBP_HORMONE_METABOLIC_PROCESS	GOBP_HORMONE_METABOLIC_PROCESS	149	0.298858	1.39083	0.119247	0.208545	0.942	2802	tags=28%, list=20%, signal=35%
GOBP_POSITIVE_REGULATION_OF_ESTABLISHMENT_OF_PROTEIN_LOCALIZATION	GOBP_POSITIVE_REGULATION_OF_ESTABLISHMENT_OF_PROTEIN_LOCALIZATION	304	0.270777	1.39069	0.0146138	0.208494	0.942	6339	tags=56%, list=45%, signal=100%
GOBP_NEGATIVE_REGULATION_OF_PROTEIN_LOCALIZATION_TO_CELL_PERIPHERY	GOBP_NEGATIVE_REGULATION_OF_PROTEIN_LOCALIZATION_TO_CELL_PERIPHERY	26	0.39523	1.39058	0.045929	0.208426	0.942	5706	tags=69%, list=41%, signal=117%
GOBP_INTERLEUKIN_4_PRODUCTION	GOBP_INTERLEUKIN_4_PRODUCTION	26	0.380304	1.39023	0.162162	0.208538	0.942	3132	tags=35%, list=22%, signal=45%
GOBP_RENAL_SYSTEM_DEVELOPMENT	GOBP_RENAL_SYSTEM_DEVELOPMENT	290	0.254087	1.38997	0.267748	0.208601	0.942	3160	tags=26%, list=23%, signal=33%
GOBP_POSITIVE_REGULATION_OF_ADENYLATE_CYCLASE_ACTIVITY	GOBP_POSITIVE_REGULATION_OF_ADENYLATE_CYCLASE_ACTIVITY	17	0.392096	1.3899	0.135524	0.208518	0.942	2537	tags=35%, list=18%, signal=43%
GOBP_CELLULAR_RESPONSE_TO_OXYGEN_RADICAL	GOBP_CELLULAR_RESPONSE_TO_OXYGEN_RADICAL	18	0.422476	1.38985	0.106122	0.208419	0.942	1051	tags=28%, list=8%, signal=30%
GOBP_STRIATED_MUSCLE_CELL_DEVELOPMENT	GOBP_STRIATED_MUSCLE_CELL_DEVELOPMENT	64	0.363204	1.38976	0.228106	0.208353	0.942	4643	tags=55%, list=33%, signal=82%
GOBP_NUCLEOTIDE_SALVAGE	GOBP_NUCLEOTIDE_SALVAGE	23	0.422839	1.38913	0.158436	0.208613	0.942	5682	tags=74%, list=41%, signal=125%
GOBP_NEGATIVE_REGULATION_OF_INTRACELLULAR_SIGNAL_TRANSDUCTION	GOBP_NEGATIVE_REGULATION_OF_INTRACELLULAR_SIGNAL_TRANSDUCTION	488	0.245555	1.38783	0.0644491	0.20941	0.942	4696	tags=39%, list=34%, signal=57%
GOBP_REGULATION_OF_REPRODUCTIVE_PROCESS	GOBP_REGULATION_OF_REPRODUCTIVE_PROCESS	143	0.244469	1.38655	0.204082	0.210183	0.942	3335	tags=28%, list=24%, signal=36%
GOBP_HIPPOCAMPUS_DEVELOPMENT	GOBP_HIPPOCAMPUS_DEVELOPMENT	59	0.271097	1.38459	0.157787	0.211644	0.944	1441	tags=17%, list=10%, signal=19%
GOBP_REGULATION_OF_APOPTOTIC_SIGNALING_PATHWAY	GOBP_REGULATION_OF_APOPTOTIC_SIGNALING_PATHWAY	373	0.26001	1.38431	0.0439331	0.211716	0.944	4874	tags=43%, list=35%, signal=65%
GOBP_NEGATIVE_REGULATION_OF_PROTEIN_IMPORT_INTO_NUCLEUS	GOBP_NEGATIVE_REGULATION_OF_PROTEIN_IMPORT_INTO_NUCLEUS	16	0.397093	1.38368	0.045929	0.212028	0.944	5470	tags=63%, list=39%, signal=103%
GOBP_TRABECULA_FORMATION	GOBP_TRABECULA_FORMATION	26	0.396579	1.38351	0.179916	0.212014	0.944	2730	tags=38%, list=20%, signal=48%
GOBP_REGULATION_OF_NEUROGENESIS	GOBP_REGULATION_OF_NEUROGENESIS	406	0.224927	1.38349	0.281633	0.211895	0.944	2858	tags=24%, list=21%, signal=29%
GOBP_REGULATION_OF_HORMONE_METABOLIC_PROCESS	GOBP_REGULATION_OF_HORMONE_METABOLIC_PROCESS	36	0.337569	1.38301	0.0724638	0.212099	0.944	5003	tags=47%, list=36%, signal=73%
GOBP_GLUTAMATE_METABOLIC_PROCESS	GOBP_GLUTAMATE_METABOLIC_PROCESS	22	0.418689	1.38223	0.137421	0.212494	0.944	5712	tags=68%, list=41%, signal=115%
GOBP_STARTLE_RESPONSE	GOBP_STARTLE_RESPONSE	22	0.417654	1.38008	0.161793	0.213979	0.944	6155	tags=59%, list=44%, signal=106%
GOBP_COPPER_ION_TRANSPORT	GOBP_COPPER_ION_TRANSPORT	15	0.434257	1.37984	0.136821	0.213976	0.944	6761	tags=80%, list=49%, signal=155%
GOBP_CARDIAC_MYOFIBRIL_ASSEMBLY	GOBP_CARDIAC_MYOFIBRIL_ASSEMBLY	17	0.415408	1.37971	0.165975	0.213965	0.944	2486	tags=35%, list=18%, signal=43%
GOBP_NEGATIVE_REGULATION_OF_GLUCOSE_TRANSMEMBRANE_TRANSPORT	GOBP_NEGATIVE_REGULATION_OF_GLUCOSE_TRANSMEMBRANE_TRANSPORT	24	0.362319	1.37968	0.163561	0.213846	0.944	6105	tags=58%, list=44%, signal=104%
GOBP_CALCIUM_ION_IMPORT_ACROSS_PLASMA_MEMBRANE	GOBP_CALCIUM_ION_IMPORT_ACROSS_PLASMA_MEMBRANE	29	0.385877	1.37868	0.14902	0.214423	0.944	1818	tags=31%, list=13%, signal=36%
GOBP_HYALURONAN_METABOLIC_PROCESS	GOBP_HYALURONAN_METABOLIC_PROCESS	30	0.36278	1.37724	0.19833	0.215401	0.945	4486	tags=50%, list=32%, signal=74%
GOBP_POSITIVE_REGULATION_OF_ORGANIC_ACID_TRANSPORT	GOBP_POSITIVE_REGULATION_OF_ORGANIC_ACID_TRANSPORT	42	0.310592	1.37712	0.125	0.215357	0.945	5319	tags=52%, list=38%, signal=84%
GOBP_INTRACELLULAR_RECEPTOR_SIGNALING_PATHWAY	GOBP_INTRACELLULAR_RECEPTOR_SIGNALING_PATHWAY	229	0.254379	1.37645	0.112266	0.215749	0.946	3117	tags=26%, list=22%, signal=33%
GOBP_NEGATIVE_REGULATION_OF_OXIDATIVE_STRESS_INDUCED_CELL_DEATH	GOBP_NEGATIVE_REGULATION_OF_OXIDATIVE_STRESS_INDUCED_CELL_DEATH	45	0.310399	1.3764	0.0934959	0.215661	0.948	7332	tags=76%, list=53%, signal=159%
GOBP_POSITIVE_REGULATION_OF_CELLULAR_COMPONENT_BIOGENESIS	GOBP_POSITIVE_REGULATION_OF_CELLULAR_COMPONENT_BIOGENESIS	466	0.240351	1.37626	0.222917	0.215629	0.948	5399	tags=44%, list=39%, signal=70%
GOBP_POSITIVE_REGULATION_OF_AMINO_ACID_TRANSPORT	GOBP_POSITIVE_REGULATION_OF_AMINO_ACID_TRANSPORT	23	0.372672	1.37615	0.14257	0.215576	0.948	4003	tags=48%, list=29%, signal=67%
GOBP_RESPONSE_TO_RETINOIC_ACID	GOBP_RESPONSE_TO_RETINOIC_ACID	68	0.274068	1.37586	0.168421	0.215618	0.948	1212	tags=18%, list=9%, signal=19%
GOBP_REGULATION_OF_ORGAN_GROWTH	GOBP_REGULATION_OF_ORGAN_GROWTH	99	0.277448	1.37432	0.136082	0.216688	0.952	3135	tags=30%, list=23%, signal=39%
GOBP_SKELETAL_MUSCLE_TISSUE_REGENERATION	GOBP_SKELETAL_MUSCLE_TISSUE_REGENERATION	39	0.325035	1.37385	0.118393	0.216867	0.952	5786	tags=59%, list=42%, signal=101%
GOBP_REGULATION_OF_STRIATED_MUSCLE_CELL_DIFFERENTIATION	GOBP_REGULATION_OF_STRIATED_MUSCLE_CELL_DIFFERENTIATION	93	0.280079	1.37307	0.119497	0.217365	0.952	3151	tags=29%, list=23%, signal=37%
GOBP_SYNAPTIC_TRANSMISSION_DOPAMINERGIC	GOBP_SYNAPTIC_TRANSMISSION_DOPAMINERGIC	21	0.398991	1.37282	0.12753	0.217476	0.952	1458	tags=29%, list=10%, signal=32%
GOBP_NEGATIVE_REGULATION_OF_PROTEIN_SERINE_THREONINE_KINASE_ACTIVITY	GOBP_NEGATIVE_REGULATION_OF_PROTEIN_SERINE_THREONINE_KINASE_ACTIVITY	101	0.302957	1.37237	0.0376569	0.217656	0.952	2846	tags=28%, list=20%, signal=35%
GOBP_REGULATION_OF_ASTROCYTE_DIFFERENTIATION	GOBP_REGULATION_OF_ASTROCYTE_DIFFERENTIATION	31	0.303448	1.37233	0.176471	0.217551	0.952	2858	tags=32%, list=21%, signal=40%
GOBP_RETINA_DEVELOPMENT_IN_CAMERA_TYPE_EYE	GOBP_RETINA_DEVELOPMENT_IN_CAMERA_TYPE_EYE	115	0.29437	1.37158	0.227368	0.218005	0.952	4184	tags=37%, list=30%, signal=52%
GOBP_REGULATION_OF_MITOCHONDRIAL_MEMBRANE_PERMEABILITY	GOBP_REGULATION_OF_MITOCHONDRIAL_MEMBRANE_PERMEABILITY	59	0.338001	1.37085	0.0503145	0.218391	0.953	4814	tags=53%, list=35%, signal=80%
GOBP_SARCOMERE_ORGANIZATION	GOBP_SARCOMERE_ORGANIZATION	43	0.387157	1.37079	0.236842	0.218295	0.953	5414	tags=65%, list=39%, signal=106%
GOBP_RESPONSE_TO_HYDROPEROXIDE	GOBP_RESPONSE_TO_HYDROPEROXIDE	15	0.378852	1.37021	0.12115	0.218636	0.953	3013	tags=40%, list=22%, signal=51%
GOBP_DIGESTIVE_TRACT_MORPHOGENESIS	GOBP_DIGESTIVE_TRACT_MORPHOGENESIS	41	0.38017	1.36936	0.220339	0.21912	0.953	932	tags=17%, list=7%, signal=18%
GOBP_ANTIGEN_PROCESSING_AND_PRESENTATION_OF_ENDOGENOUS_ANTIGEN	GOBP_ANTIGEN_PROCESSING_AND_PRESENTATION_OF_ENDOGENOUS_ANTIGEN	27	0.379581	1.36918	0.170874	0.219118	0.953	6139	tags=67%, list=44%, signal=119%
GOBP_REGULATION_OF_CELLULAR_RESPONSE_TO_TRANSFORMING_GROWTH_FACTOR_BETA_STIMULUS	GOBP_REGULATION_OF_CELLULAR_RESPONSE_TO_TRANSFORMING_GROWTH_FACTOR_BETA_STIMULUS	128	0.256926	1.36912	0.127615	0.219021	0.953	2051	tags=23%, list=15%, signal=26%
GOBP_NEGATIVE_REGULATION_OF_T_CELL_APOPTOTIC_PROCESS	GOBP_NEGATIVE_REGULATION_OF_T_CELL_APOPTOTIC_PROCESS	25	0.381648	1.36905	0.136842	0.218955	0.953	4074	tags=44%, list=29%, signal=62%
GOBP_REGULATION_OF_INTERLEUKIN_4_PRODUCTION	GOBP_REGULATION_OF_INTERLEUKIN_4_PRODUCTION	23	0.402697	1.3683	0.13617	0.219364	0.953	1803	tags=26%, list=13%, signal=30%
GOBP_NEGATIVE_REGULATION_OF_GROWTH	GOBP_NEGATIVE_REGULATION_OF_GROWTH	237	0.239744	1.36816	0.247379	0.219335	0.953	3810	tags=29%, list=27%, signal=39%
GOBP_SKELETAL_SYSTEM_DEVELOPMENT	GOBP_SKELETAL_SYSTEM_DEVELOPMENT	463	0.236608	1.36811	0.296066	0.219235	0.953	1995	tags=18%, list=14%, signal=20%
GOBP_MELANIN_METABOLIC_PROCESS	GOBP_MELANIN_METABOLIC_PROCESS	23	0.419645	1.36734	0.196468	0.219712	0.954	5812	tags=61%, list=42%, signal=104%
GOBP_NEGATIVE_REGULATION_OF_CALCIUM_MEDIATED_SIGNALING	GOBP_NEGATIVE_REGULATION_OF_CALCIUM_MEDIATED_SIGNALING	19	0.367325	1.3669	0.182186	0.219906	0.954	2594	tags=37%, list=19%, signal=45%
GOBP_FERTILIZATION	GOBP_FERTILIZATION	112	0.220968	1.36648	0.073922	0.220071	0.954	6359	tags=51%, list=46%, signal=93%
GOBP_CELL_VOLUME_HOMEOSTASIS	GOBP_CELL_VOLUME_HOMEOSTASIS	25	0.33409	1.36613	0.105368	0.220251	0.96	7541	tags=80%, list=54%, signal=174%
GOBP_POSITIVE_REGULATION_OF_NEURON_MIGRATION	GOBP_POSITIVE_REGULATION_OF_NEURON_MIGRATION	22	0.412867	1.36506	0.229474	0.220895	0.96	2085	tags=27%, list=15%, signal=32%
GOBP_CHONDROCYTE_PROLIFERATION	GOBP_CHONDROCYTE_PROLIFERATION	18	0.464058	1.36479	0.178947	0.220971	0.96	3573	tags=44%, list=26%, signal=60%
GOBP_MORPHOGENESIS_OF_AN_EPITHELIAL_BUD	GOBP_MORPHOGENESIS_OF_AN_EPITHELIAL_BUD	16	0.446013	1.36427	0.15222	0.221245	0.96	837	tags=19%, list=6%, signal=20%
GOBP_REGULATION_OF_HEPATOCYTE_PROLIFERATION	GOBP_REGULATION_OF_HEPATOCYTE_PROLIFERATION	20	0.393017	1.36377	0.154812	0.221456	0.96	2523	tags=40%, list=18%, signal=49%
GOBP_REGULATION_OF_CARDIAC_MUSCLE_CELL_PROLIFERATION	GOBP_REGULATION_OF_CARDIAC_MUSCLE_CELL_PROLIFERATION	40	0.30313	1.3622	0.15121	0.22257	0.96	4165	tags=43%, list=30%, signal=60%
GOBP_PURINE_NUCLEOTIDE_TRANSPORT	GOBP_PURINE_NUCLEOTIDE_TRANSPORT	20	0.384301	1.36146	0.134172	0.222994	0.96	5761	tags=65%, list=41%, signal=111%
GOBP_CELLULAR_RESPONSE_TO_CADMIUM_ION	GOBP_CELLULAR_RESPONSE_TO_CADMIUM_ION	19	0.35179	1.36115	0.064257	0.223083	0.96	791	tags=21%, list=6%, signal=22%
GOBP_NEGATIVE_REGULATION_OF_FIBROBLAST_PROLIFERATION	GOBP_NEGATIVE_REGULATION_OF_FIBROBLAST_PROLIFERATION	41	0.302785	1.3607	0.140496	0.223245	0.96	3623	tags=34%, list=26%, signal=46%
GOBP_SENSORY_ORGAN_MORPHOGENESIS	GOBP_SENSORY_ORGAN_MORPHOGENESIS	221	0.27229	1.36025	0.259414	0.22353	0.963	3751	tags=30%, list=27%, signal=40%
GOBP_POSITIVE_REGULATION_OF_ORGANELLE_ORGANIZATION	GOBP_POSITIVE_REGULATION_OF_ORGANELLE_ORGANIZATION	487	0.238467	1.35879	0.195426	0.224437	0.963	4866	tags=41%, list=35%, signal=61%
GOBP_SPHINGOLIPID_METABOLIC_PROCESS	GOBP_SPHINGOLIPID_METABOLIC_PROCESS	129	0.312655	1.35698	0.117155	0.225664	0.963	3790	tags=40%, list=27%, signal=54%
GOBP_POSITIVE_REGULATION_OF_CELLULAR_RESPONSE_TO_INSULIN_STIMULUS	GOBP_POSITIVE_REGULATION_OF_CELLULAR_RESPONSE_TO_INSULIN_STIMULUS	33	0.356789	1.35684	0.0354167	0.225641	0.963	5750	tags=64%, list=41%, signal=108%
GOBP_REGULATION_OF_POTASSIUM_ION_TRANSMEMBRANE_TRANSPORT	GOBP_REGULATION_OF_POTASSIUM_ION_TRANSMEMBRANE_TRANSPORT	72	0.269789	1.35604	0.144869	0.22615	0.963	6029	tags=54%, list=43%, signal=95%
GOBP_POSITIVE_REGULATION_OF_AMINE_TRANSPORT	GOBP_POSITIVE_REGULATION_OF_AMINE_TRANSPORT	35	0.31976	1.35497	0.15213	0.226914	0.964	5321	tags=51%, list=38%, signal=83%
GOBP_REGULATION_OF_CELL_JUNCTION_ASSEMBLY	GOBP_REGULATION_OF_CELL_JUNCTION_ASSEMBLY	198	0.250262	1.35466	0.310204	0.227049	0.964	3865	tags=32%, list=28%, signal=44%
GOBP_NEGATIVE_REGULATION_OF_MAP_KINASE_ACTIVITY	GOBP_NEGATIVE_REGULATION_OF_MAP_KINASE_ACTIVITY	58	0.310277	1.35409	0.0560166	0.227322	0.964	3086	tags=29%, list=22%, signal=37%
GOBP_REGULATION_OF_INSULIN_SECRETION	GOBP_REGULATION_OF_INSULIN_SECRETION	166	0.233475	1.35376	0.16318	0.22749	0.964	2779	tags=23%, list=20%, signal=29%
GOBP_NEGATIVE_REGULATION_OF_SYNAPTIC_TRANSMISSION	GOBP_NEGATIVE_REGULATION_OF_SYNAPTIC_TRANSMISSION	49	0.295327	1.3535	0.198783	0.227516	0.964	2905	tags=33%, list=21%, signal=41%
GOBP_INTRACELLULAR_GLUCOSE_HOMEOSTASIS	GOBP_INTRACELLULAR_GLUCOSE_HOMEOSTASIS	130	0.241279	1.35264	0.12115	0.227996	0.965	7828	tags=64%, list=56%, signal=144%
GOBP_NOTCH_SIGNALING_PATHWAY	GOBP_NOTCH_SIGNALING_PATHWAY	155	0.246658	1.35263	0.229814	0.227867	0.965	2962	tags=27%, list=21%, signal=34%
GOBP_REGULATION_OF_ORGANIC_ACID_TRANSPORT	GOBP_REGULATION_OF_ORGANIC_ACID_TRANSPORT	71	0.298886	1.35224	0.14959	0.228054	0.967	5445	tags=51%, list=39%, signal=83%
GOBP_REGULATION_OF_ACTIN_NUCLEATION	GOBP_REGULATION_OF_ACTIN_NUCLEATION	32	0.321913	1.35076	0.0718686	0.229161	0.967	4406	tags=44%, list=32%, signal=64%
GOBP_PINOCYTOSIS	GOBP_PINOCYTOSIS	22	0.411304	1.34977	0.0726141	0.229816	0.968	4966	tags=64%, list=36%, signal=99%
GOBP_EXPORT_ACROSS_PLASMA_MEMBRANE	GOBP_EXPORT_ACROSS_PLASMA_MEMBRANE	52	0.289293	1.34947	0.124016	0.229915	0.968	5764	tags=58%, list=41%, signal=98%
GOBP_RESPONSE_TO_ALCOHOL	GOBP_RESPONSE_TO_ALCOHOL	126	0.254269	1.34935	0.118012	0.229866	0.968	3412	tags=30%, list=24%, signal=40%
GOBP_REGULATION_OF_P38MAPK_CASCADE	GOBP_REGULATION_OF_P38MAPK_CASCADE	38	0.318552	1.34934	0.22449	0.229738	0.968	1839	tags=21%, list=13%, signal=24%
GOBP_POSITIVE_REGULATION_OF_NUCLEOTIDE_METABOLIC_PROCESS	GOBP_POSITIVE_REGULATION_OF_NUCLEOTIDE_METABOLIC_PROCESS	38	0.306306	1.34873	0.236111	0.230104	0.968	6111	tags=58%, list=44%, signal=103%
GOBP_RESPONSE_TO_ANGIOTENSIN	GOBP_RESPONSE_TO_ANGIOTENSIN	23	0.375717	1.34748	0.0788382	0.23103	0.968	7598	tags=83%, list=55%, signal=181%
GOBP_MORPHOGENESIS_OF_AN_EPITHELIUM	GOBP_MORPHOGENESIS_OF_AN_EPITHELIUM	496	0.245401	1.34694	0.3125	0.231311	0.968	3169	tags=25%, list=23%, signal=31%
GOBP_NEGATIVE_REGULATION_OF_PHOSPHORUS_METABOLIC_PROCESS	GOBP_NEGATIVE_REGULATION_OF_PHOSPHORUS_METABOLIC_PROCESS	408	0.251179	1.34669	0.131799	0.231382	0.968	3973	tags=35%, list=29%, signal=47%
GOBP_SYNAPTIC_VESICLE_EXOCYTOSIS	GOBP_SYNAPTIC_VESICLE_EXOCYTOSIS	81	0.220449	1.34645	0.204868	0.231426	0.968	3389	tags=30%, list=24%, signal=39%
GOBP_REGULATION_OF_POTASSIUM_ION_TRANSPORT	GOBP_REGULATION_OF_POTASSIUM_ION_TRANSPORT	84	0.263867	1.34617	0.176591	0.231493	0.968	2085	tags=23%, list=15%, signal=26%
GOBP_MYOBLAST_MIGRATION	GOBP_MYOBLAST_MIGRATION	15	0.367958	1.34595	0.147844	0.231549	0.968	3453	tags=40%, list=25%, signal=53%
GOBP_INTRINSIC_APOPTOTIC_SIGNALING_PATHWAY	GOBP_INTRINSIC_APOPTOTIC_SIGNALING_PATHWAY	297	0.261132	1.34513	0.0377359	0.232002	0.968	4089	tags=37%, list=29%, signal=51%
GOBP_CERAMIDE_METABOLIC_PROCESS	GOBP_CERAMIDE_METABOLIC_PROCESS	89	0.320736	1.34484	0.163866	0.232094	0.968	3159	tags=35%, list=23%, signal=45%
GOBP_NECROPTOTIC_PROCESS	GOBP_NECROPTOTIC_PROCESS	36	0.336054	1.34463	0.0270833	0.232116	0.968	7381	tags=78%, list=53%, signal=165%
GOBP_REGULATION_OF_INTRINSIC_APOPTOTIC_SIGNALING_PATHWAY_IN_RESPONSE_TO_DNA_DAMAGE	GOBP_REGULATION_OF_INTRINSIC_APOPTOTIC_SIGNALING_PATHWAY_IN_RESPONSE_TO_DNA_DAMAGE	38	0.318485	1.3445	0.114583	0.23209	0.968	4505	tags=47%, list=32%, signal=70%
GOBP_POSITIVE_REGULATION_OF_CELLULAR_RESPIRATION	GOBP_POSITIVE_REGULATION_OF_CELLULAR_RESPIRATION	21	0.377072	1.34443	0.176101	0.23199	0.968	6408	tags=67%, list=46%, signal=123%
GOBP_DNA_CATABOLIC_PROCESS	GOBP_DNA_CATABOLIC_PROCESS	29	0.342619	1.34426	0.120332	0.231988	0.968	3957	tags=45%, list=28%, signal=62%
GOBP_NEURON_RECOGNITION	GOBP_NEURON_RECOGNITION	38	0.326267	1.34395	0.190574	0.232105	0.968	2658	tags=26%, list=19%, signal=32%
GOBP_RETINA_MORPHOGENESIS_IN_CAMERA_TYPE_EYE	GOBP_RETINA_MORPHOGENESIS_IN_CAMERA_TYPE_EYE	47	0.354716	1.34377	0.178197	0.232123	0.968	2469	tags=28%, list=18%, signal=34%
GOBP_CARTILAGE_DEVELOPMENT_INVOLVED_IN_ENDOCHONDRAL_BONE_MORPHOGENESIS	GOBP_CARTILAGE_DEVELOPMENT_INVOLVED_IN_ENDOCHONDRAL_BONE_MORPHOGENESIS	30	0.340989	1.34302	0.241736	0.232591	0.968	4780	tags=43%, list=34%, signal=66%
GOBP_MESENCHYMAL_CELL_PROLIFERATION	GOBP_MESENCHYMAL_CELL_PROLIFERATION	47	0.308426	1.34272	0.212551	0.232704	0.968	2547	tags=26%, list=18%, signal=31%
GOBP_CELLULAR_RESPONSE_TO_TOXIC_SUBSTANCE	GOBP_CELLULAR_RESPONSE_TO_TOXIC_SUBSTANCE	52	0.343907	1.34132	0.269939	0.233697	0.968	7332	tags=73%, list=53%, signal=154%
GOBP_REFLEX	GOBP_REFLEX	19	0.381361	1.34119	0.124224	0.233649	0.968	1813	tags=21%, list=13%, signal=24%
GOBP_RESPONSE_TO_ISCHEMIA	GOBP_RESPONSE_TO_ISCHEMIA	43	0.272153	1.34117	0.202105	0.233527	0.968	3717	tags=35%, list=27%, signal=47%
GOBP_POSITIVE_REGULATION_OF_NITRIC_OXIDE_SYNTHASE_ACTIVITY	GOBP_POSITIVE_REGULATION_OF_NITRIC_OXIDE_SYNTHASE_ACTIVITY	16	0.334527	1.34112	0.142857	0.233432	0.968	1845	tags=25%, list=13%, signal=29%
GOBP_MAINTENANCE_OF_PROTEIN_LOCATION	GOBP_MAINTENANCE_OF_PROTEIN_LOCATION	96	0.284452	1.33962	0.0847108	0.234485	0.969	3883	tags=40%, list=28%, signal=55%
GOBP_POSITIVE_REGULATION_OF_PROTEIN_LOCALIZATION	GOBP_POSITIVE_REGULATION_OF_PROTEIN_LOCALIZATION	452	0.243276	1.33957	0.0893971	0.234387	0.969	6548	tags=54%, list=47%, signal=99%
GOBP_NEGATIVE_REGULATION_OF_HORMONE_SECRETION	GOBP_NEGATIVE_REGULATION_OF_HORMONE_SECRETION	74	0.26446	1.33858	0.123482	0.235062	0.969	1987	tags=20%, list=14%, signal=24%
GOBP_PROGRAMMED_CELL_DEATH_INVOLVED_IN_CELL_DEVELOPMENT	GOBP_PROGRAMMED_CELL_DEATH_INVOLVED_IN_CELL_DEVELOPMENT	21	0.305797	1.33847	0.142857	0.235031	0.969	4671	tags=52%, list=34%, signal=79%
GOBP_SECONDARY_METABOLIC_PROCESS	GOBP_SECONDARY_METABOLIC_PROCESS	42	0.340884	1.33754	0.186722	0.235696	0.969	5300	tags=57%, list=38%, signal=92%
GOBP_NEGATIVE_REGULATION_OF_KINASE_ACTIVITY	GOBP_NEGATIVE_REGULATION_OF_KINASE_ACTIVITY	208	0.262219	1.33742	0.0606695	0.235651	0.969	3623	tags=33%, list=26%, signal=44%
GOBP_POSITIVE_REGULATION_OF_PROTEIN_POLYMERIZATION	GOBP_POSITIVE_REGULATION_OF_PROTEIN_POLYMERIZATION	81	0.27643	1.33685	0.220619	0.235887	0.969	4447	tags=41%, list=32%, signal=59%
GOBP_ECTODERMAL_PLACODE_DEVELOPMENT	GOBP_ECTODERMAL_PLACODE_DEVELOPMENT	15	0.380292	1.33634	0.176349	0.236216	0.975	1160	tags=20%, list=8%, signal=22%
GOBP_TIGHT_JUNCTION_ORGANIZATION	GOBP_TIGHT_JUNCTION_ORGANIZATION	71	0.276303	1.335	0.178794	0.237139	0.975	1327	tags=17%, list=10%, signal=19%
GOBP_RESPONSE_TO_CAMP	GOBP_RESPONSE_TO_CAMP	45	0.314636	1.33463	0.190377	0.23731	0.975	2430	tags=29%, list=17%, signal=35%
GOBP_REGULATION_OF_LIPID_KINASE_ACTIVITY	GOBP_REGULATION_OF_LIPID_KINASE_ACTIVITY	47	0.311294	1.3346	0.247967	0.237187	0.975	3463	tags=36%, list=25%, signal=48%
GOBP_FATTY_ACID_DERIVATIVE_BIOSYNTHETIC_PROCESS	GOBP_FATTY_ACID_DERIVATIVE_BIOSYNTHETIC_PROCESS	17	0.416087	1.33435	0.160079	0.237271	0.975	2364	tags=35%, list=17%, signal=42%
GOBP_POSITIVE_REGULATION_OF_RECEPTOR_INTERNALIZATION	GOBP_POSITIVE_REGULATION_OF_RECEPTOR_INTERNALIZATION	29	0.341104	1.33427	0.177453	0.237204	0.975	3155	tags=38%, list=23%, signal=49%
GOBP_REGULATION_OF_MUSCLE_ADAPTATION	GOBP_REGULATION_OF_MUSCLE_ADAPTATION	93	0.278678	1.33346	0.18711	0.23769	0.975	6333	tags=55%, list=45%, signal=100%
GOBP_POSITIVE_REGULATION_OF_PROTEIN_DEPHOSPHORYLATION	GOBP_POSITIVE_REGULATION_OF_PROTEIN_DEPHOSPHORYLATION	42	0.312505	1.33343	0.164271	0.237577	0.975	1140	tags=19%, list=8%, signal=21%
GOBP_POSITIVE_REGULATION_OF_TRANSPORTER_ACTIVITY	GOBP_POSITIVE_REGULATION_OF_TRANSPORTER_ACTIVITY	108	0.256448	1.3333	0.25	0.237526	0.975	3396	tags=33%, list=24%, signal=44%
GOBP_PEPTIDYL_TYROSINE_AUTOPHOSPHORYLATION	GOBP_PEPTIDYL_TYROSINE_AUTOPHOSPHORYLATION	22	0.38009	1.33271	0.238866	0.237842	0.975	3473	tags=41%, list=25%, signal=54%
GOBP_TOXIN_TRANSPORT	GOBP_TOXIN_TRANSPORT	35	0.379036	1.3327	0.0649895	0.23772	0.975	5937	tags=69%, list=43%, signal=119%
GOBP_MOTOR_NEURON_AXON_GUIDANCE	GOBP_MOTOR_NEURON_AXON_GUIDANCE	29	0.367911	1.33263	0.171717	0.23763	0.975	1663	tags=28%, list=12%, signal=31%
GOBP_REGULATION_OF_B_CELL_APOPTOTIC_PROCESS	GOBP_REGULATION_OF_B_CELL_APOPTOTIC_PROCESS	18	0.395939	1.33225	0.0993789	0.237797	0.975	6451	tags=72%, list=46%, signal=134%
GOBP_SODIUM_ION_TRANSMEMBRANE_TRANSPORT	GOBP_SODIUM_ION_TRANSMEMBRANE_TRANSPORT	114	0.254128	1.33168	0.159274	0.238149	0.975	5178	tags=42%, list=37%, signal=66%
GOBP_SYNAPTIC_TRANSMISSION_GABAERGIC	GOBP_SYNAPTIC_TRANSMISSION_GABAERGIC	42	0.299003	1.33162	0.155136	0.238051	0.975	1813	tags=24%, list=13%, signal=27%
GOBP_PLACENTA_BLOOD_VESSEL_DEVELOPMENT	GOBP_PLACENTA_BLOOD_VESSEL_DEVELOPMENT	33	0.298452	1.33133	0.235052	0.238138	0.977	3883	tags=42%, list=28%, signal=59%
GOBP_CELL_DIFFERENTIATION_IN_HINDBRAIN	GOBP_CELL_DIFFERENTIATION_IN_HINDBRAIN	19	0.35548	1.33128	0.224319	0.238032	0.977	3190	tags=32%, list=23%, signal=41%
GOBP_MUSCLE_ADAPTATION	GOBP_MUSCLE_ADAPTATION	114	0.274233	1.33058	0.18125	0.238453	0.978	6871	tags=59%, list=49%, signal=115%
GOBP_EPITHELIAL_CELL_DIFFERENTIATION_INVOLVED_IN_KIDNEY_DEVELOPMENT	GOBP_EPITHELIAL_CELL_DIFFERENTIATION_INVOLVED_IN_KIDNEY_DEVELOPMENT	33	0.327602	1.3302	0.23444	0.238631	0.978	802	tags=18%, list=6%, signal=19%
GOBP_REGULATION_OF_DEVELOPMENTAL_GROWTH	GOBP_REGULATION_OF_DEVELOPMENTAL_GROWTH	335	0.222626	1.32997	0.279261	0.238668	0.978	3642	tags=28%, list=26%, signal=37%
GOBP_PROTEIN_TARGETING_TO_MEMBRANE	GOBP_PROTEIN_TARGETING_TO_MEMBRANE	108	0.289215	1.32959	0.0774059	0.238831	0.978	7799	tags=73%, list=56%, signal=165%
GOBP_CALCIUM_ION_REGULATED_EXOCYTOSIS	GOBP_CALCIUM_ION_REGULATED_EXOCYTOSIS	50	0.285725	1.32817	0.186	0.239783	0.981	6279	tags=52%, list=45%, signal=94%
GOBP_REGULATION_OF_RECEPTOR_SIGNALING_PATHWAY_VIA_STAT	GOBP_REGULATION_OF_RECEPTOR_SIGNALING_PATHWAY_VIA_STAT	72	0.271882	1.32793	0.241525	0.239863	0.981	1988	tags=24%, list=14%, signal=27%
GOBP_HEAT_GENERATION	GOBP_HEAT_GENERATION	19	0.476622	1.32791	0.113725	0.239748	0.981	1818	tags=32%, list=13%, signal=36%
GOBP_MUSCLE_HYPERTROPHY	GOBP_MUSCLE_HYPERTROPHY	99	0.267701	1.32749	0.160825	0.239938	0.981	4937	tags=42%, list=35%, signal=65%
GOBP_ENDOPLASMIC_RETICULUM_CALCIUM_ION_HOMEOSTASIS	GOBP_ENDOPLASMIC_RETICULUM_CALCIUM_ION_HOMEOSTASIS	28	0.400249	1.32649	0.081761	0.240637	0.981	6792	tags=79%, list=49%, signal=153%
GOBP_EMBRYONIC_PATTERN_SPECIFICATION	GOBP_EMBRYONIC_PATTERN_SPECIFICATION	54	0.312548	1.32637	0.28481	0.240599	0.981	1423	tags=15%, list=10%, signal=16%
GOBP_RESPONSE_TO_CARBOHYDRATE	GOBP_RESPONSE_TO_CARBOHYDRATE	166	0.221581	1.32636	0.129363	0.240464	0.981	6122	tags=49%, list=44%, signal=87%
GOBP_POSITIVE_REGULATION_OF_AXON_EXTENSION	GOBP_POSITIVE_REGULATION_OF_AXON_EXTENSION	51	0.288496	1.3263	0.270161	0.240366	0.981	2002	tags=25%, list=14%, signal=30%
GOBP_MEMBRANE_LIPID_CATABOLIC_PROCESS	GOBP_MEMBRANE_LIPID_CATABOLIC_PROCESS	29	0.387747	1.32608	0.154489	0.240401	0.981	3611	tags=52%, list=26%, signal=70%
GOBP_CELLULAR_RESPONSE_TO_RETINOIC_ACID	GOBP_CELLULAR_RESPONSE_TO_RETINOIC_ACID	35	0.284917	1.32557	0.18125	0.240686	0.981	1074	tags=17%, list=8%, signal=19%
GOBP_NEGATIVE_REGULATION_OF_DNA_BINDING_TRANSCRIPTION_FACTOR_ACTIVITY	GOBP_NEGATIVE_REGULATION_OF_DNA_BINDING_TRANSCRIPTION_FACTOR_ACTIVITY	149	0.255595	1.32551	0.039501	0.240596	0.981	4501	tags=40%, list=32%, signal=59%
GOBP_INTRACELLULAR_SODIUM_ION_HOMEOSTASIS	GOBP_INTRACELLULAR_SODIUM_ION_HOMEOSTASIS	23	0.392791	1.32448	0.154639	0.241313	0.981	519	tags=17%, list=4%, signal=18%
GOBP_HEPATIC_STELLATE_CELL_ACTIVATION	GOBP_HEPATIC_STELLATE_CELL_ACTIVATION	15	0.394556	1.3242	0.198718	0.241398	0.981	5712	tags=67%, list=41%, signal=113%
GOBP_BONE_CELL_DEVELOPMENT	GOBP_BONE_CELL_DEVELOPMENT	37	0.351484	1.3231	0.24	0.242164	0.981	2085	tags=27%, list=15%, signal=32%
GOBP_CALCIUM_ION_IMPORT	GOBP_CALCIUM_ION_IMPORT	46	0.307519	1.32308	0.184584	0.242038	0.981	2147	tags=28%, list=15%, signal=33%
GOBP_RUFFLE_ASSEMBLY	GOBP_RUFFLE_ASSEMBLY	42	0.330821	1.32234	0.0495868	0.242528	0.981	7026	tags=69%, list=50%, signal=139%
GOBP_GENITALIA_DEVELOPMENT	GOBP_GENITALIA_DEVELOPMENT	32	0.305229	1.32234	0.202899	0.24239	0.981	2511	tags=25%, list=18%, signal=30%
GOBP_RHYTHMIC_BEHAVIOR	GOBP_RHYTHMIC_BEHAVIOR	41	0.293775	1.32217	0.163708	0.242391	0.981	1455	tags=17%, list=10%, signal=19%
GOBP_NEGATIVE_REGULATION_OF_INTRACELLULAR_TRANSPORT	GOBP_NEGATIVE_REGULATION_OF_INTRACELLULAR_TRANSPORT	59	0.303705	1.32191	0.102725	0.242437	0.981	5999	tags=59%, list=43%, signal=104%
GOBP_POSITIVE_REGULATION_OF_BONE_MINERALIZATION	GOBP_POSITIVE_REGULATION_OF_BONE_MINERALIZATION	44	0.325544	1.32183	0.180672	0.242362	0.981	2114	tags=25%, list=15%, signal=29%
GOBP_INSULIN_SECRETION_INVOLVED_IN_CELLULAR_RESPONSE_TO_GLUCOSE_STIMULUS	GOBP_INSULIN_SECRETION_INVOLVED_IN_CELLULAR_RESPONSE_TO_GLUCOSE_STIMULUS	74	0.244504	1.32157	0.18896	0.24242	0.981	7828	tags=65%, list=56%, signal=147%
GOBP_NEGATIVE_REGULATION_OF_STRIATED_MUSCLE_CELL_APOPTOTIC_PROCESS	GOBP_NEGATIVE_REGULATION_OF_STRIATED_MUSCLE_CELL_APOPTOTIC_PROCESS	35	0.310807	1.32143	0.139004	0.242451	0.981	7431	tags=74%, list=53%, signal=159%
GOBP_INOSITOL_PHOSPHATE_MEDIATED_SIGNALING	GOBP_INOSITOL_PHOSPHATE_MEDIATED_SIGNALING	46	0.303707	1.32108	0.238806	0.242587	0.981	3266	tags=35%, list=23%, signal=45%
GOBP_LAMELLIPODIUM_MORPHOGENESIS	GOBP_LAMELLIPODIUM_MORPHOGENESIS	15	0.443527	1.32099	0.161491	0.24252	0.981	4594	tags=60%, list=33%, signal=89%
GOBP_BONE_GROWTH	GOBP_BONE_GROWTH	31	0.344403	1.3209	0.221757	0.24245	0.981	4780	tags=45%, list=34%, signal=69%
GOBP_PROTEIN_KINASE_A_SIGNALING	GOBP_PROTEIN_KINASE_A_SIGNALING	27	0.353687	1.32	0.206897	0.243007	0.981	6066	tags=63%, list=44%, signal=111%
GOBP_ANTIGEN_PROCESSING_AND_PRESENTATION_VIA_MHC_CLASS_IB	GOBP_ANTIGEN_PROCESSING_AND_PRESENTATION_VIA_MHC_CLASS_IB	24	0.357163	1.31903	0.20198	0.243695	0.981	1931	tags=29%, list=14%, signal=34%
GOBP_REGULATION_OF_CARDIAC_MUSCLE_CELL_MEMBRANE_REPOLARIZATION	GOBP_REGULATION_OF_CARDIAC_MUSCLE_CELL_MEMBRANE_REPOLARIZATION	22	0.406462	1.31843	0.167331	0.244022	0.981	3421	tags=50%, list=25%, signal=66%
GOBP_EPITHELIAL_CELL_MORPHOGENESIS	GOBP_EPITHELIAL_CELL_MORPHOGENESIS	39	0.352044	1.31832	0.250509	0.243976	0.981	3169	tags=31%, list=23%, signal=40%
GOBP_REGULATION_OF_SYNAPTIC_TRANSMISSION_GABAERGIC	GOBP_REGULATION_OF_SYNAPTIC_TRANSMISSION_GABAERGIC	30	0.34904	1.31818	0.14135	0.243977	0.981	1523	tags=27%, list=11%, signal=30%
GOBP_REGULATION_OF_FATTY_ACID_TRANSPORT	GOBP_REGULATION_OF_FATTY_ACID_TRANSPORT	30	0.306031	1.3181	0.133333	0.243896	0.981	5445	tags=53%, list=39%, signal=87%
GOBP_IMP_METABOLIC_PROCESS	GOBP_IMP_METABOLIC_PROCESS	21	0.417489	1.31787	0.169492	0.243962	0.981	5682	tags=71%, list=41%, signal=120%
GOBP_DEVELOPMENTAL_PIGMENTATION	GOBP_DEVELOPMENTAL_PIGMENTATION	48	0.287335	1.31779	0.242915	0.243903	0.981	8127	tags=69%, list=58%, signal=164%
GOBP_KERATINOCYTE_DIFFERENTIATION	GOBP_KERATINOCYTE_DIFFERENTIATION	120	0.30992	1.31734	0.253669	0.244137	0.981	3076	tags=27%, list=22%, signal=34%
GOBP_T_HELPER_17_CELL_DIFFERENTIATION	GOBP_T_HELPER_17_CELL_DIFFERENTIATION	19	0.405519	1.3167	0.219512	0.24456	0.981	413	tags=16%, list=3%, signal=16%
GOBP_HEMATOPOIETIC_PROGENITOR_CELL_DIFFERENTIATION	GOBP_HEMATOPOIETIC_PROGENITOR_CELL_DIFFERENTIATION	145	0.256656	1.3166	0.22869	0.244508	0.981	2504	tags=21%, list=18%, signal=26%
GOBP_FOREBRAIN_CELL_MIGRATION	GOBP_FOREBRAIN_CELL_MIGRATION	57	0.260998	1.31646	0.175365	0.244455	0.981	1742	tags=21%, list=13%, signal=24%
GOBP_PROTEIN_LOCALIZATION_TO_ENDOPLASMIC_RETICULUM	GOBP_PROTEIN_LOCALIZATION_TO_ENDOPLASMIC_RETICULUM	72	0.365729	1.31638	0.135417	0.244378	0.981	7522	tags=83%, list=54%, signal=180%
GOBP_PROTEIN_CONTAINING_COMPLEX_REMODELING	GOBP_PROTEIN_CONTAINING_COMPLEX_REMODELING	18	0.323751	1.31625	0.169811	0.244378	0.981	1962	tags=28%, list=14%, signal=32%
GOBP_CARDIAC_MUSCLE_CELL_ACTION_POTENTIAL	GOBP_CARDIAC_MUSCLE_CELL_ACTION_POTENTIAL	53	0.294028	1.31578	0.193676	0.244649	0.981	3421	tags=36%, list=25%, signal=47%
GOBP_NEGATIVE_REGULATION_OF_STRIATED_MUSCLE_CELL_DIFFERENTIATION	GOBP_NEGATIVE_REGULATION_OF_STRIATED_MUSCLE_CELL_DIFFERENTIATION	39	0.309215	1.31537	0.141667	0.244876	0.981	2838	tags=28%, list=20%, signal=35%
GOBP_SYNAPTIC_TRANSMISSION_GLUTAMATERGIC	GOBP_SYNAPTIC_TRANSMISSION_GLUTAMATERGIC	72	0.275563	1.31528	0.186747	0.244828	0.981	3155	tags=32%, list=23%, signal=41%
GOBP_REGULATION_OF_SECONDARY_METABOLIC_PROCESS	GOBP_REGULATION_OF_SECONDARY_METABOLIC_PROCESS	15	0.419672	1.31513	0.221757	0.244795	0.981	5300	tags=60%, list=38%, signal=97%
GOBP_REGULATION_OF_MYOTUBE_DIFFERENTIATION	GOBP_REGULATION_OF_MYOTUBE_DIFFERENTIATION	42	0.333875	1.31505	0.238901	0.244714	0.981	3151	tags=36%, list=23%, signal=46%
GOBP_REGULATION_OF_T_HELPER_17_TYPE_IMMUNE_RESPONSE	GOBP_REGULATION_OF_T_HELPER_17_TYPE_IMMUNE_RESPONSE	21	0.393824	1.31429	0.220165	0.245221	0.981	3494	tags=38%, list=25%, signal=51%
GOBP_POSITIVE_REGULATION_OF_RECEPTOR_SIGNALING_PATHWAY_VIA_STAT	GOBP_POSITIVE_REGULATION_OF_RECEPTOR_SIGNALING_PATHWAY_VIA_STAT	34	0.335689	1.31337	0.192067	0.245862	0.981	3819	tags=41%, list=27%, signal=57%
GOBP_STRESS_ACTIVATED_PROTEIN_KINASE_SIGNALING_CASCADE	GOBP_STRESS_ACTIVATED_PROTEIN_KINASE_SIGNALING_CASCADE	226	0.236151	1.31309	0.207469	0.245958	0.981	4866	tags=38%, list=35%, signal=58%
GOBP_EMBRYONIC_EYE_MORPHOGENESIS	GOBP_EMBRYONIC_EYE_MORPHOGENESIS	27	0.333112	1.31231	0.21097	0.246428	0.981	1509	tags=19%, list=11%, signal=21%
GOBP_REGULATION_OF_GLIOGENESIS	GOBP_REGULATION_OF_GLIOGENESIS	112	0.230912	1.31163	0.240741	0.246848	0.981	2858	tags=26%, list=21%, signal=32%
GOBP_REGULATION_OF_INTRACELLULAR_PROTEIN_TRANSPORT	GOBP_REGULATION_OF_INTRACELLULAR_PROTEIN_TRANSPORT	205	0.276453	1.31079	0.0167715	0.247419	0.981	6800	tags=60%, list=49%, signal=115%
GOBP_RESPONSE_TO_DIETARY_EXCESS	GOBP_RESPONSE_TO_DIETARY_EXCESS	27	0.311687	1.3093	0.216867	0.248475	0.984	3430	tags=33%, list=25%, signal=44%
GOBP_MAINTENANCE_OF_SYNAPSE_STRUCTURE	GOBP_MAINTENANCE_OF_SYNAPSE_STRUCTURE	18	0.347428	1.30861	0.204255	0.248861	0.984	4642	tags=50%, list=33%, signal=75%
GOBP_RESPONSE_TO_PROSTAGLANDIN	GOBP_RESPONSE_TO_PROSTAGLANDIN	18	0.336562	1.3085	0.190945	0.248807	0.984	1037	tags=22%, list=7%, signal=24%
GOBP_NEGATIVE_REGULATION_OF_EPITHELIAL_CELL_APOPTOTIC_PROCESS	GOBP_NEGATIVE_REGULATION_OF_EPITHELIAL_CELL_APOPTOTIC_PROCESS	52	0.296351	1.30832	0.289583	0.248818	0.984	3778	tags=35%, list=27%, signal=47%
GOBP_CELL_REDOX_HOMEOSTASIS	GOBP_CELL_REDOX_HOMEOSTASIS	30	0.385833	1.30813	0.0985325	0.248835	0.984	7547	tags=87%, list=54%, signal=189%
GOBP_POSITIVE_REGULATION_OF_MYOTUBE_DIFFERENTIATION	GOBP_POSITIVE_REGULATION_OF_MYOTUBE_DIFFERENTIATION	15	0.439839	1.30782	0.201646	0.248962	0.984	3507	tags=53%, list=25%, signal=71%
GOBP_SYNAPTIC_VESICLE_RECYCLING	GOBP_SYNAPTIC_VESICLE_RECYCLING	76	0.272745	1.30742	0.221519	0.249181	0.984	7085	tags=64%, list=51%, signal=130%
GOBP_POSITIVE_REGULATION_OF_MACROPHAGE_DIFFERENTIATION	GOBP_POSITIVE_REGULATION_OF_MACROPHAGE_DIFFERENTIATION	15	0.376795	1.30741	0.199187	0.249045	0.984	3581	tags=47%, list=26%, signal=63%
GOBP_NEGATIVE_REGULATION_OF_MULTICELLULAR_ORGANISM_GROWTH	GOBP_NEGATIVE_REGULATION_OF_MULTICELLULAR_ORGANISM_GROWTH	15	0.419196	1.30736	0.161359	0.248963	0.984	1879	tags=27%, list=13%, signal=31%
GOBP_CARDIAC_VENTRICLE_DEVELOPMENT	GOBP_CARDIAC_VENTRICLE_DEVELOPMENT	117	0.247394	1.30628	0.302277	0.249686	0.984	4014	tags=32%, list=29%, signal=45%
GOBP_CERAMIDE_BIOSYNTHETIC_PROCESS	GOBP_CERAMIDE_BIOSYNTHETIC_PROCESS	62	0.320633	1.30597	0.17437	0.249852	0.984	3790	tags=37%, list=27%, signal=51%
GOBP_LYMPHOID_PROGENITOR_CELL_DIFFERENTIATION	GOBP_LYMPHOID_PROGENITOR_CELL_DIFFERENTIATION	23	0.301883	1.30547	0.192149	0.250099	0.984	3643	tags=30%, list=26%, signal=41%
GOBP_NEGATIVE_REGULATION_OF_ERBB_SIGNALING_PATHWAY	GOBP_NEGATIVE_REGULATION_OF_ERBB_SIGNALING_PATHWAY	28	0.342512	1.30528	0.115942	0.250144	0.984	2953	tags=36%, list=21%, signal=45%
GOBP_EMBRYONIC_ORGAN_DEVELOPMENT	GOBP_EMBRYONIC_ORGAN_DEVELOPMENT	404	0.224643	1.3045	0.333333	0.250695	0.984	3643	tags=26%, list=26%, signal=34%
GOBP_PROGRAMMED_NECROTIC_CELL_DEATH	GOBP_PROGRAMMED_NECROTIC_CELL_DEATH	46	0.299063	1.30449	0.113131	0.250564	0.984	5207	tags=52%, list=37%, signal=83%
GOBP_NEGATIVE_REGULATION_OF_NUCLEOTIDE_METABOLIC_PROCESS	GOBP_NEGATIVE_REGULATION_OF_NUCLEOTIDE_METABOLIC_PROCESS	27	0.32972	1.30404	0.164557	0.250758	0.984	4986	tags=48%, list=36%, signal=75%
GOBP_CLATHRIN_DEPENDENT_ENDOCYTOSIS	GOBP_CLATHRIN_DEPENDENT_ENDOCYTOSIS	46	0.312802	1.30386	0.1893	0.250784	0.984	3267	tags=37%, list=23%, signal=48%
GOBP_APICAL_JUNCTION_ASSEMBLY	GOBP_APICAL_JUNCTION_ASSEMBLY	67	0.290498	1.3035	0.17484	0.250941	0.984	1327	tags=18%, list=10%, signal=20%
GOBP_REGULATION_OF_DNA_DAMAGE_RESPONSE_SIGNAL_TRANSDUCTION_BY_P53_CLASS_MEDIATOR	GOBP_REGULATION_OF_DNA_DAMAGE_RESPONSE_SIGNAL_TRANSDUCTION_BY_P53_CLASS_MEDIATOR	36	0.321656	1.30279	0.102083	0.251324	0.984	4650	tags=50%, list=33%, signal=75%
GOBP_PROTEIN_HETEROOLIGOMERIZATION	GOBP_PROTEIN_HETEROOLIGOMERIZATION	20	0.326624	1.30266	0.161157	0.251284	0.984	8083	tags=80%, list=58%, signal=190%
GOBP_CELL_DIFFERENTIATION_INVOLVED_IN_KIDNEY_DEVELOPMENT	GOBP_CELL_DIFFERENTIATION_INVOLVED_IN_KIDNEY_DEVELOPMENT	41	0.312749	1.30264	0.268443	0.251156	0.984	1836	tags=22%, list=13%, signal=25%
GOBP_PROTEIN_LOCALIZATION_TO_PLASMA_MEMBRANE	GOBP_PROTEIN_LOCALIZATION_TO_PLASMA_MEMBRANE	277	0.258858	1.30249	0.0314465	0.251117	0.984	6616	tags=58%, list=47%, signal=108%
GOBP_PRESYNAPTIC_ENDOCYTOSIS	GOBP_PRESYNAPTIC_ENDOCYTOSIS	69	0.278384	1.30203	0.225053	0.251373	0.984	7085	tags=65%, list=51%, signal=132%
GOBP_RESPONSE_TO_SALT_STRESS	GOBP_RESPONSE_TO_SALT_STRESS	21	0.349663	1.30196	0.195426	0.251301	0.984	5326	tags=57%, list=38%, signal=92%
GOBP_CORONARY_VASCULATURE_MORPHOGENESIS	GOBP_CORONARY_VASCULATURE_MORPHOGENESIS	25	0.346956	1.30189	0.218814	0.251218	0.984	2824	tags=36%, list=20%, signal=45%
GOBP_RESPONSE_TO_TESTOSTERONE	GOBP_RESPONSE_TO_TESTOSTERONE	15	0.372719	1.30187	0.156379	0.251102	0.984	7273	tags=80%, list=52%, signal=167%
GOBP_DETECTION_OF_STIMULUS_INVOLVED_IN_SENSORY_PERCEPTION	GOBP_DETECTION_OF_STIMULUS_INVOLVED_IN_SENSORY_PERCEPTION	53	0.337286	1.30148	0.162055	0.251313	0.984	2016	tags=28%, list=14%, signal=33%
GOBP_CYCLIC_NUCLEOTIDE_MEDIATED_SIGNALING	GOBP_CYCLIC_NUCLEOTIDE_MEDIATED_SIGNALING	62	0.295332	1.30107	0.226	0.251565	0.984	3013	tags=31%, list=22%, signal=39%
GOBP_REGULATION_OF_TRANS_SYNAPTIC_SIGNALING	GOBP_REGULATION_OF_TRANS_SYNAPTIC_SIGNALING	426	0.210879	1.29958	0.20122	0.252647	0.986	3267	tags=27%, list=23%, signal=34%
GOBP_ANIMAL_ORGAN_MATURATION	GOBP_ANIMAL_ORGAN_MATURATION	31	0.308663	1.29935	0.227176	0.25269	0.987	1366	tags=19%, list=10%, signal=21%
GOBP_CELLULAR_RESPONSE_TO_GLUCOSE_STARVATION	GOBP_CELLULAR_RESPONSE_TO_GLUCOSE_STARVATION	51	0.290915	1.29926	0.139004	0.252623	0.987	906	tags=16%, list=7%, signal=17%
GOBP_POSITIVE_REGULATION_OF_DEVELOPMENTAL_GROWTH	GOBP_POSITIVE_REGULATION_OF_DEVELOPMENTAL_GROWTH	177	0.22514	1.2992	0.287169	0.252558	0.987	2319	tags=20%, list=17%, signal=24%
GOBP_SYNAPSE_ORGANIZATION	GOBP_SYNAPSE_ORGANIZATION	432	0.220151	1.29823	0.303093	0.253248	0.987	3777	tags=31%, list=27%, signal=41%
GOBP_BRANCHING_INVOLVED_IN_SALIVARY_GLAND_MORPHOGENESIS	GOBP_BRANCHING_INVOLVED_IN_SALIVARY_GLAND_MORPHOGENESIS	23	0.363562	1.29805	0.236287	0.253257	0.987	4486	tags=43%, list=32%, signal=64%
GOBP_TELENCEPHALON_DEVELOPMENT	GOBP_TELENCEPHALON_DEVELOPMENT	204	0.209474	1.29781	0.301848	0.253318	0.987	4524	tags=34%, list=32%, signal=49%
GOBP_REGULATION_OF_PHOSPHOPROTEIN_PHOSPHATASE_ACTIVITY	GOBP_REGULATION_OF_PHOSPHOPROTEIN_PHOSPHATASE_ACTIVITY	46	0.273191	1.29718	0.187629	0.253787	0.987	2594	tags=26%, list=19%, signal=32%
GOBP_SENSORY_ORGAN_DEVELOPMENT	GOBP_SENSORY_ORGAN_DEVELOPMENT	454	0.229212	1.29683	0.304703	0.253978	0.987	2318	tags=19%, list=17%, signal=22%
GOBP_MYELOID_DENDRITIC_CELL_DIFFERENTIATION	GOBP_MYELOID_DENDRITIC_CELL_DIFFERENTIATION	20	0.424875	1.29678	0.245136	0.253878	0.987	3154	tags=45%, list=23%, signal=58%
GOBP_POSITIVE_REGULATION_OF_RECEPTOR_MEDIATED_ENDOCYTOSIS	GOBP_POSITIVE_REGULATION_OF_RECEPTOR_MEDIATED_ENDOCYTOSIS	54	0.296139	1.29663	0.236515	0.25386	0.987	7460	tags=72%, list=54%, signal=155%
GOBP_RESPONSE_TO_AUDITORY_STIMULUS	GOBP_RESPONSE_TO_AUDITORY_STIMULUS	18	0.34999	1.29656	0.18	0.253764	0.987	2627	tags=33%, list=19%, signal=41%
GOBP_NEGATIVE_REGULATION_OF_INSULIN_SECRETION_INVOLVED_IN_CELLULAR_RESPONSE_TO_GLUCOSE_STIMULUS	GOBP_NEGATIVE_REGULATION_OF_INSULIN_SECRETION_INVOLVED_IN_CELLULAR_RESPONSE_TO_GLUCOSE_STIMULUS	16	0.328113	1.29612	0.156673	0.254016	0.987	7828	tags=88%, list=56%, signal=199%
GOBP_ACTION_POTENTIAL	GOBP_ACTION_POTENTIAL	113	0.273752	1.29547	0.193613	0.254377	0.987	3094	tags=32%, list=22%, signal=41%
GOBP_CHLORIDE_TRANSPORT	GOBP_CHLORIDE_TRANSPORT	62	0.257148	1.29484	0.168399	0.25474	0.987	3582	tags=29%, list=26%, signal=39%
GOBP_INSULIN_SECRETION	GOBP_INSULIN_SECRETION	188	0.217406	1.29471	0.209016	0.254697	0.987	3337	tags=26%, list=24%, signal=34%
GOBP_POLYSACCHARIDE_CATABOLIC_PROCESS	GOBP_POLYSACCHARIDE_CATABOLIC_PROCESS	25	0.346721	1.29464	0.259109	0.254655	0.987	6683	tags=72%, list=48%, signal=138%
GOBP_TEMPERATURE_HOMEOSTASIS	GOBP_TEMPERATURE_HOMEOSTASIS	166	0.256441	1.29446	0.155136	0.254658	0.987	1849	tags=19%, list=13%, signal=21%
GOBP_RESPONSE_TO_TOXIC_SUBSTANCE	GOBP_RESPONSE_TO_TOXIC_SUBSTANCE	107	0.273782	1.2939	0.231092	0.254955	0.987	2513	tags=27%, list=18%, signal=33%
GOBP_RESPONSE_TO_NITRIC_OXIDE	GOBP_RESPONSE_TO_NITRIC_OXIDE	15	0.344948	1.29343	0.163968	0.255241	0.987	9006	tags=93%, list=65%, signal=264%
GOBP_INTERLEUKIN_1_MEDIATED_SIGNALING_PATHWAY	GOBP_INTERLEUKIN_1_MEDIATED_SIGNALING_PATHWAY	22	0.346079	1.29318	0.228216	0.255261	0.987	3473	tags=41%, list=25%, signal=54%
GOBP_POSITIVE_REGULATION_OF_NATURAL_KILLER_CELL_ACTIVATION	GOBP_POSITIVE_REGULATION_OF_NATURAL_KILLER_CELL_ACTIVATION	27	0.30361	1.29312	0.192698	0.255171	0.987	3778	tags=41%, list=27%, signal=56%
GOBP_REPRODUCTIVE_SYSTEM_DEVELOPMENT	GOBP_REPRODUCTIVE_SYSTEM_DEVELOPMENT	229	0.220211	1.29299	0.276596	0.255148	0.987	1615	tags=14%, list=12%, signal=16%
GOBP_RESPONSE_TO_XENOBIOTIC_STIMULUS	GOBP_RESPONSE_TO_XENOBIOTIC_STIMULUS	220	0.255566	1.29177	0.121593	0.256001	0.987	2635	tags=24%, list=19%, signal=29%
GOBP_NUCLEOTIDE_TRANSPORT	GOBP_NUCLEOTIDE_TRANSPORT	24	0.353967	1.29154	0.261954	0.256057	0.987	5761	tags=63%, list=41%, signal=106%
GOBP_REGULATION_OF_AMYLOID_FIBRIL_FORMATION	GOBP_REGULATION_OF_AMYLOID_FIBRIL_FORMATION	15	0.378435	1.29104	0.185714	0.256342	0.987	5234	tags=67%, list=38%, signal=107%
GOBP_PROSTANOID_METABOLIC_PROCESS	GOBP_PROSTANOID_METABOLIC_PROCESS	48	0.286773	1.29081	0.156701	0.256414	0.987	3623	tags=35%, list=26%, signal=48%
GOBP_MITOCHONDRIAL_ELECTRON_TRANSPORT_CYTOCHROME_C_TO_OXYGEN	GOBP_MITOCHONDRIAL_ELECTRON_TRANSPORT_CYTOCHROME_C_TO_OXYGEN	15	0.571442	1.29044	0.237624	0.256577	0.987	4702	tags=87%, list=34%, signal=131%
GOBP_NEGATIVE_REGULATION_OF_TRANSFERASE_ACTIVITY	GOBP_NEGATIVE_REGULATION_OF_TRANSFERASE_ACTIVITY	245	0.252852	1.28984	0.0648536	0.256945	0.987	7865	tags=67%, list=56%, signal=152%
GOBP_REGULATION_OF_VACUOLE_ORGANIZATION	GOBP_REGULATION_OF_VACUOLE_ORGANIZATION	45	0.341783	1.28965	0.0496894	0.256962	0.987	7782	tags=82%, list=56%, signal=186%
GOBP_ORGANIC_ANION_TRANSPORT	GOBP_ORGANIC_ANION_TRANSPORT	285	0.245306	1.28946	0.155136	0.256958	0.987	4042	tags=34%, list=29%, signal=47%
GOBP_BIOLOGICAL_PROCESS_INVOLVED_IN_INTERACTION_WITH_SYMBIONT	GOBP_BIOLOGICAL_PROCESS_INVOLVED_IN_INTERACTION_WITH_SYMBIONT	84	0.293136	1.28927	0.0293501	0.256972	0.987	7437	tags=67%, list=53%, signal=142%
GOBP_REGULATION_OF_CYCLIN_DEPENDENT_PROTEIN_KINASE_ACTIVITY	GOBP_REGULATION_OF_CYCLIN_DEPENDENT_PROTEIN_KINASE_ACTIVITY	67	0.288797	1.28892	0.198745	0.257121	0.987	7258	tags=63%, list=52%, signal=130%
GOBP_CAMERA_TYPE_EYE_PHOTORECEPTOR_CELL_DIFFERENTIATION	GOBP_CAMERA_TYPE_EYE_PHOTORECEPTOR_CELL_DIFFERENTIATION	24	0.379292	1.2886	0.227743	0.257247	0.987	4388	tags=42%, list=31%, signal=61%
GOBP_REGULATION_OF_ENDOTHELIAL_CELL_DEVELOPMENT	GOBP_REGULATION_OF_ENDOTHELIAL_CELL_DEVELOPMENT	17	0.401382	1.28857	0.197917	0.257123	0.987	1481	tags=29%, list=11%, signal=33%
GOBP_CELL_SUBSTRATE_JUNCTION_ORGANIZATION	GOBP_CELL_SUBSTRATE_JUNCTION_ORGANIZATION	104	0.315233	1.28734	0.238589	0.258173	0.987	3570	tags=38%, list=26%, signal=50%
GOBP_BINDING_OF_SPERM_TO_ZONA_PELLUCIDA	GOBP_BINDING_OF_SPERM_TO_ZONA_PELLUCIDA	20	0.405725	1.28625	0.181443	0.25896	0.987	5482	tags=70%, list=39%, signal=115%
GOBP_MORPHOGENESIS_OF_AN_EPITHELIAL_SHEET	GOBP_MORPHOGENESIS_OF_AN_EPITHELIAL_SHEET	57	0.31283	1.28492	0.247335	0.259914	0.987	3052	tags=28%, list=22%, signal=36%
GOBP_POSITIVE_REGULATION_OF_REPRODUCTIVE_PROCESS	GOBP_POSITIVE_REGULATION_OF_REPRODUCTIVE_PROCESS	69	0.27464	1.2849	0.272349	0.25979	0.987	3529	tags=30%, list=25%, signal=41%
GOBP_CELLULAR_RESPONSE_TO_XENOBIOTIC_STIMULUS	GOBP_CELLULAR_RESPONSE_TO_XENOBIOTIC_STIMULUS	110	0.272606	1.28484	0.194969	0.259706	0.987	4008	tags=35%, list=29%, signal=48%
GOBP_CELLULAR_RESPONSE_TO_DSRNA	GOBP_CELLULAR_RESPONSE_TO_DSRNA	19	0.370839	1.28419	0.176221	0.260095	0.987	3790	tags=47%, list=27%, signal=65%
GOBP_PROSTANOID_BIOSYNTHETIC_PROCESS	GOBP_PROSTANOID_BIOSYNTHETIC_PROCESS	28	0.309221	1.28411	0.172557	0.260034	0.987	2379	tags=25%, list=17%, signal=30%
GOBP_NEGATIVE_REGULATION_OF_RHO_PROTEIN_SIGNAL_TRANSDUCTION	GOBP_NEGATIVE_REGULATION_OF_RHO_PROTEIN_SIGNAL_TRANSDUCTION	25	0.335656	1.28286	0.246914	0.260993	0.987	4340	tags=40%, list=31%, signal=58%
GOBP_NEGATIVE_REGULATION_OF_EPITHELIAL_CELL_DIFFERENTIATION	GOBP_NEGATIVE_REGULATION_OF_EPITHELIAL_CELL_DIFFERENTIATION	45	0.311369	1.28246	0.261147	0.261191	0.987	852	tags=16%, list=6%, signal=17%
GOBP_FOCAL_ADHESION_ASSEMBLY	GOBP_FOCAL_ADHESION_ASSEMBLY	86	0.313429	1.28227	0.224742	0.261231	0.987	3570	tags=38%, list=26%, signal=51%
GOBP_ORGANIC_ACID_TRANSPORT	GOBP_ORGANIC_ACID_TRANSPORT	243	0.239788	1.28027	0.142558	0.262855	0.987	3412	tags=30%, list=24%, signal=39%
GOBP_REGULATION_OF_MICROTUBULE_POLYMERIZATION_OR_DEPOLYMERIZATION	GOBP_REGULATION_OF_MICROTUBULE_POLYMERIZATION_OR_DEPOLYMERIZATION	85	0.252836	1.28018	0.300207	0.262813	0.987	3683	tags=33%, list=26%, signal=45%
GOBP_PLASMA_MEMBRANE_REPAIR	GOBP_PLASMA_MEMBRANE_REPAIR	29	0.359609	1.27959	0.081761	0.263137	0.987	6805	tags=76%, list=49%, signal=148%
GOBP_RESPONSE_TO_HEAT	GOBP_RESPONSE_TO_HEAT	85	0.250906	1.27931	0.158996	0.263198	0.987	6808	tags=62%, list=49%, signal=121%
GOBP_NEGATIVE_REGULATION_OF_PROGRAMMED_NECROTIC_CELL_DEATH	GOBP_NEGATIVE_REGULATION_OF_PROGRAMMED_NECROTIC_CELL_DEATH	18	0.353217	1.27888	0.085595	0.263458	0.987	7381	tags=83%, list=53%, signal=177%
GOBP_EXTRACELLULAR_VESICLE_BIOGENESIS	GOBP_EXTRACELLULAR_VESICLE_BIOGENESIS	24	0.394851	1.27883	0.133056	0.263394	0.987	7884	tags=88%, list=57%, signal=201%
GOBP_PURINE_NUCLEOBASE_METABOLIC_PROCESS	GOBP_PURINE_NUCLEOBASE_METABOLIC_PROCESS	21	0.404754	1.27859	0.198745	0.263459	0.987	2926	tags=43%, list=21%, signal=54%
GOBP_SYNAPTIC_VESICLE_LUMEN_ACIDIFICATION	GOBP_SYNAPTIC_VESICLE_LUMEN_ACIDIFICATION	17	0.440919	1.27858	0.163743	0.263324	0.987	7213	tags=94%, list=52%, signal=195%
GOBP_EYE_MORPHOGENESIS	GOBP_EYE_MORPHOGENESIS	128	0.265369	1.27857	0.261954	0.263185	0.987	3684	tags=30%, list=26%, signal=41%
GOBP_POSITIVE_REGULATION_OF_NERVOUS_SYSTEM_DEVELOPMENT	GOBP_POSITIVE_REGULATION_OF_NERVOUS_SYSTEM_DEVELOPMENT	303	0.219128	1.27732	0.311715	0.264177	0.988	2858	tags=24%, list=21%, signal=30%
GOBP_REGULATION_OF_CELL_PROJECTION_ASSEMBLY	GOBP_REGULATION_OF_CELL_PROJECTION_ASSEMBLY	183	0.219638	1.27727	0.297959	0.264083	0.988	5154	tags=43%, list=37%, signal=67%
GOBP_REGULATION_OF_INTRINSIC_APOPTOTIC_SIGNALING_PATHWAY	GOBP_REGULATION_OF_INTRINSIC_APOPTOTIC_SIGNALING_PATHWAY	168	0.262432	1.27694	0.0712788	0.264264	0.988	6702	tags=60%, list=48%, signal=114%
GOBP_GLYCOLIPID_BIOSYNTHETIC_PROCESS	GOBP_GLYCOLIPID_BIOSYNTHETIC_PROCESS	62	0.310042	1.27653	0.26556	0.264492	0.988	4093	tags=42%, list=29%, signal=59%
GOBP_LIMBIC_SYSTEM_DEVELOPMENT	GOBP_LIMBIC_SYSTEM_DEVELOPMENT	78	0.243459	1.27649	0.230769	0.264388	0.988	1441	tags=15%, list=10%, signal=17%
GOBP_NEGATIVE_REGULATION_OF_PROTEIN_LOCALIZATION_TO_NUCLEUS	GOBP_NEGATIVE_REGULATION_OF_PROTEIN_LOCALIZATION_TO_NUCLEUS	37	0.276198	1.27619	0.155279	0.264533	0.988	5470	tags=49%, list=39%, signal=80%
GOBP_CYTOPLASMIC_SEQUESTERING_OF_PROTEIN	GOBP_CYTOPLASMIC_SEQUESTERING_OF_PROTEIN	21	0.376864	1.27557	0.103093	0.264894	0.988	3064	tags=48%, list=22%, signal=61%
GOBP_POSITIVE_REGULATION_OF_NEURON_DIFFERENTIATION	GOBP_POSITIVE_REGULATION_OF_NEURON_DIFFERENTIATION	73	0.259257	1.27513	0.276553	0.26513	0.988	4101	tags=38%, list=29%, signal=54%
GOBP_REGULATION_OF_RESPONSE_TO_OSMOTIC_STRESS	GOBP_REGULATION_OF_RESPONSE_TO_OSMOTIC_STRESS	15	0.379947	1.2744	0.207661	0.265641	0.988	6339	tags=73%, list=45%, signal=134%
GOBP_NEGATIVE_REGULATION_OF_COLD_INDUCED_THERMOGENESIS	GOBP_NEGATIVE_REGULATION_OF_COLD_INDUCED_THERMOGENESIS	47	0.278945	1.27382	0.178197	0.265935	0.988	4967	tags=45%, list=36%, signal=69%
GOBP_REGULATION_OF_ESTABLISHMENT_OF_PLANAR_POLARITY	GOBP_REGULATION_OF_ESTABLISHMENT_OF_PLANAR_POLARITY	38	0.333138	1.27269	0.286611	0.266856	0.988	1139	tags=16%, list=8%, signal=17%
GOBP_CELLULAR_RESPONSE_TO_EXTERNAL_STIMULUS	GOBP_CELLULAR_RESPONSE_TO_EXTERNAL_STIMULUS	247	0.24174	1.27257	0.0964361	0.266839	0.989	7101	tags=59%, list=51%, signal=118%
GOBP_ENDOCHONDRAL_BONE_MORPHOGENESIS	GOBP_ENDOCHONDRAL_BONE_MORPHOGENESIS	57	0.282169	1.27239	0.284232	0.266871	0.989	7016	tags=54%, list=50%, signal=109%
GOBP_RIBONUCLEOSIDE_MONOPHOSPHATE_BIOSYNTHETIC_PROCESS	GOBP_RIBONUCLEOSIDE_MONOPHOSPHATE_BIOSYNTHETIC_PROCESS	32	0.370577	1.27163	0.258799	0.267383	0.989	5740	tags=66%, list=41%, signal=111%
GOBP_AMINOGLYCAN_BIOSYNTHETIC_PROCESS	GOBP_AMINOGLYCAN_BIOSYNTHETIC_PROCESS	52	0.278256	1.27089	0.226804	0.267914	0.989	5069	tags=50%, list=36%, signal=78%
GOBP_POSITIVE_REGULATION_OF_NEUROGENESIS	GOBP_POSITIVE_REGULATION_OF_NEUROGENESIS	267	0.222819	1.27068	0.29375	0.267976	0.989	2858	tags=25%, list=21%, signal=31%
GOBP_REGULATION_OF_UBIQUITIN_PROTEIN_TRANSFERASE_ACTIVITY	GOBP_REGULATION_OF_UBIQUITIN_PROTEIN_TRANSFERASE_ACTIVITY	47	0.347176	1.2704	0.144958	0.268061	0.989	7229	tags=79%, list=52%, signal=163%
GOBP_PODOSOME_ASSEMBLY	GOBP_PODOSOME_ASSEMBLY	20	0.361376	1.27029	0.240326	0.268011	0.989	1991	tags=30%, list=14%, signal=35%
GOBP_HOMOPHILIC_CELL_ADHESION_VIA_PLASMA_MEMBRANE_ADHESION_MOLECULES	GOBP_HOMOPHILIC_CELL_ADHESION_VIA_PLASMA_MEMBRANE_ADHESION_MOLECULES	76	0.336076	1.27007	0.255814	0.268098	0.989	2272	tags=28%, list=16%, signal=33%
GOBP_SKELETAL_MUSCLE_ORGAN_DEVELOPMENT	GOBP_SKELETAL_MUSCLE_ORGAN_DEVELOPMENT	180	0.241477	1.27002	0.284519	0.268003	0.989	3709	tags=36%, list=27%, signal=48%
GOBP_ONE_CARBON_COMPOUND_TRANSPORT	GOBP_ONE_CARBON_COMPOUND_TRANSPORT	25	0.443441	1.26983	0.201681	0.268019	0.989	4768	tags=52%, list=34%, signal=79%
GOBP_REGULATION_OF_PHOSPHATASE_ACTIVITY	GOBP_REGULATION_OF_PHOSPHATASE_ACTIVITY	69	0.250268	1.26952	0.210417	0.268174	0.989	5634	tags=46%, list=40%, signal=77%
GOBP_SCF_DEPENDENT_PROTEASOMAL_UBIQUITIN_DEPENDENT_PROTEIN_CATABOLIC_PROCESS	GOBP_SCF_DEPENDENT_PROTEASOMAL_UBIQUITIN_DEPENDENT_PROTEIN_CATABOLIC_PROCESS	45	0.293682	1.26941	0.221074	0.268132	0.989	7175	tags=69%, list=52%, signal=142%
GOBP_NEGATIVE_REGULATION_OF_TRANSMEMBRANE_RECEPTOR_PROTEIN_SERINE_THREONINE_KINASE_SIGNALING_PATHWAY	GOBP_NEGATIVE_REGULATION_OF_TRANSMEMBRANE_RECEPTOR_PROTEIN_SERINE_THREONINE_KINASE_SIGNALING_PATHWAY	123	0.231947	1.26925	0.183932	0.26814	0.989	2826	tags=24%, list=20%, signal=30%
GOBP_CELL_SURFACE_RECEPTOR_SIGNALING_PATHWAY_INVOLVED_IN_HEART_DEVELOPMENT	GOBP_CELL_SURFACE_RECEPTOR_SIGNALING_PATHWAY_INVOLVED_IN_HEART_DEVELOPMENT	26	0.369816	1.26881	0.247423	0.268324	0.989	2034	tags=23%, list=15%, signal=27%
GOBP_REGULATION_OF_SMAD_PROTEIN_SIGNAL_TRANSDUCTION	GOBP_REGULATION_OF_SMAD_PROTEIN_SIGNAL_TRANSDUCTION	29	0.279205	1.26865	0.16	0.2683	0.989	3166	tags=34%, list=23%, signal=45%
GOBP_RAC_PROTEIN_SIGNAL_TRANSDUCTION	GOBP_RAC_PROTEIN_SIGNAL_TRANSDUCTION	49	0.297997	1.26851	0.221294	0.268296	0.989	4499	tags=41%, list=32%, signal=60%
GOBP_ERAD_PATHWAY	GOBP_ERAD_PATHWAY	99	0.341388	1.268	0.262195	0.268558	0.989	8026	tags=86%, list=58%, signal=201%
GOBP_NEGATIVE_REGULATION_OF_RELEASE_OF_CYTOCHROME_C_FROM_MITOCHONDRIA	GOBP_NEGATIVE_REGULATION_OF_RELEASE_OF_CYTOCHROME_C_FROM_MITOCHONDRIA	21	0.37218	1.26588	0.201646	0.270395	0.989	6228	tags=71%, list=45%, signal=129%
GOBP_METANEPHRIC_EPITHELIUM_DEVELOPMENT	GOBP_METANEPHRIC_EPITHELIUM_DEVELOPMENT	17	0.337649	1.26571	0.226804	0.270386	0.989	5985	tags=59%, list=43%, signal=103%
GOBP_LIPID_LOCALIZATION	GOBP_LIPID_LOCALIZATION	363	0.21842	1.26552	0.163866	0.270407	0.989	3099	tags=26%, list=22%, signal=33%
GOBP_POSITIVE_REGULATION_OF_PLASMA_MEMBRANE_BOUNDED_CELL_PROJECTION_ASSEMBLY	GOBP_POSITIVE_REGULATION_OF_PLASMA_MEMBRANE_BOUNDED_CELL_PROJECTION_ASSEMBLY	103	0.237728	1.26505	0.226216	0.270696	0.989	5011	tags=46%, list=36%, signal=71%
GOBP_GMP_METABOLIC_PROCESS	GOBP_GMP_METABOLIC_PROCESS	22	0.407909	1.26453	0.22449	0.270993	0.989	6871	tags=82%, list=49%, signal=161%
GOBP_NUCLEOBASE_METABOLIC_PROCESS	GOBP_NUCLEOBASE_METABOLIC_PROCESS	35	0.340478	1.26394	0.259494	0.271447	0.989	2987	tags=37%, list=21%, signal=47%
GOBP_CELL_DIFFERENTIATION_IN_SPINAL_CORD	GOBP_CELL_DIFFERENTIATION_IN_SPINAL_CORD	32	0.350555	1.26382	0.270213	0.271402	0.989	1813	tags=19%, list=13%, signal=22%
GOBP_NEGATIVE_REGULATION_OF_PROTEIN_SECRETION	GOBP_NEGATIVE_REGULATION_OF_PROTEIN_SECRETION	72	0.229229	1.26343	0.231884	0.271586	0.99	3729	tags=32%, list=27%, signal=43%
GOBP_PROTEIN_FOLDING	GOBP_PROTEIN_FOLDING	150	0.333411	1.26301	0.196687	0.27182	0.99	8388	tags=88%, list=60%, signal=219%
GOBP_EPITHELIAL_CELL_DEVELOPMENT	GOBP_EPITHELIAL_CELL_DEVELOPMENT	192	0.267005	1.26235	0.340956	0.272226	0.99	3404	tags=29%, list=24%, signal=37%
GOBP_MEMBRANE_REPOLARIZATION	GOBP_MEMBRANE_REPOLARIZATION	38	0.29216	1.26221	0.204365	0.272207	0.99	1325	tags=21%, list=10%, signal=23%
GOBP_REGULATION_OF_AMYLOID_BETA_CLEARANCE	GOBP_REGULATION_OF_AMYLOID_BETA_CLEARANCE	15	0.31757	1.26191	0.15493	0.272312	0.99	6419	tags=67%, list=46%, signal=123%
GOBP_RESPONSE_TO_FATTY_ACID	GOBP_RESPONSE_TO_FATTY_ACID	29	0.333123	1.26174	0.208768	0.272298	0.99	1806	tags=24%, list=13%, signal=28%
GOBP_REGULATION_OF_LIPID_CATABOLIC_PROCESS	GOBP_REGULATION_OF_LIPID_CATABOLIC_PROCESS	53	0.299824	1.2614	0.261954	0.272449	0.99	3412	tags=36%, list=24%, signal=47%
GOBP_REGULATION_OF_GENERATION_OF_PRECURSOR_METABOLITES_AND_ENERGY	GOBP_REGULATION_OF_GENERATION_OF_PRECURSOR_METABOLITES_AND_ENERGY	137	0.253279	1.26131	0.247899	0.272398	0.99	6111	tags=53%, list=44%, signal=94%
GOBP_POSITIVE_REGULATION_OF_CELL_JUNCTION_ASSEMBLY	GOBP_POSITIVE_REGULATION_OF_CELL_JUNCTION_ASSEMBLY	94	0.26228	1.26122	0.298755	0.272342	0.99	3389	tags=31%, list=24%, signal=40%
GOBP_POSITIVE_REGULATION_OF_OSSIFICATION	GOBP_POSITIVE_REGULATION_OF_OSSIFICATION	56	0.300853	1.26097	0.263948	0.272448	0.99	2114	tags=21%, list=15%, signal=25%
GOBP_CELLULAR_RESPONSE_TO_ABIOTIC_STIMULUS	GOBP_CELLULAR_RESPONSE_TO_ABIOTIC_STIMULUS	262	0.219204	1.26043	0.208333	0.27281	0.99	6362	tags=48%, list=46%, signal=87%
GOBP_PROTEIN_AUTOPHOSPHORYLATION	GOBP_PROTEIN_AUTOPHOSPHORYLATION	219	0.240651	1.26026	0.270325	0.272829	0.99	8206	tags=68%, list=59%, signal=162%
GOBP_GLUTAMINE_METABOLIC_PROCESS	GOBP_GLUTAMINE_METABOLIC_PROCESS	20	0.368995	1.25994	0.240084	0.272956	0.99	5869	tags=65%, list=42%, signal=112%
GOBP_CORONARY_VASCULATURE_DEVELOPMENT	GOBP_CORONARY_VASCULATURE_DEVELOPMENT	63	0.289458	1.25993	0.300412	0.272813	0.99	2838	tags=29%, list=20%, signal=36%
GOBP_POTASSIUM_ION_HOMEOSTASIS	GOBP_POTASSIUM_ION_HOMEOSTASIS	23	0.347465	1.25981	0.222449	0.272761	0.99	5764	tags=57%, list=41%, signal=96%
GOBP_NEURON_FATE_COMMITMENT	GOBP_NEURON_FATE_COMMITMENT	49	0.293612	1.25964	0.290456	0.272775	0.99	2401	tags=22%, list=17%, signal=27%
GOBP_RETINAL_GANGLION_CELL_AXON_GUIDANCE	GOBP_RETINAL_GANGLION_CELL_AXON_GUIDANCE	16	0.442713	1.25946	0.177243	0.272788	0.99	1781	tags=38%, list=13%, signal=43%
GOBP_RECEPTOR_METABOLIC_PROCESS	GOBP_RECEPTOR_METABOLIC_PROCESS	78	0.280644	1.25925	0.0356394	0.27284	0.99	5976	tags=55%, list=43%, signal=96%
GOBP_CARBOHYDRATE_TRANSMEMBRANE_TRANSPORT	GOBP_CARBOHYDRATE_TRANSMEMBRANE_TRANSPORT	105	0.265784	1.25889	0.168421	0.273065	0.99	5445	tags=48%, list=39%, signal=78%
GOBP_REGULATION_OF_PROTEIN_POLYUBIQUITINATION	GOBP_REGULATION_OF_PROTEIN_POLYUBIQUITINATION	27	0.317918	1.25872	0.0840336	0.273098	0.99	4245	tags=44%, list=30%, signal=64%
GOBP_REGULATION_OF_CATECHOLAMINE_METABOLIC_PROCESS	GOBP_REGULATION_OF_CATECHOLAMINE_METABOLIC_PROCESS	18	0.367182	1.25866	0.233068	0.272998	0.99	5933	tags=61%, list=43%, signal=106%
GOBP_RESPONSE_TO_PEPTIDE	GOBP_RESPONSE_TO_PEPTIDE	372	0.259239	1.2582	0.0958333	0.273296	0.99	6821	tags=58%, list=49%, signal=111%
GOBP_REGULATION_OF_JNK_CASCADE	GOBP_REGULATION_OF_JNK_CASCADE	131	0.232647	1.25741	0.2875	0.27392	0.99	2995	tags=25%, list=21%, signal=32%
GOBP_CARDIAC_MUSCLE_CELL_CONTRACTION	GOBP_CARDIAC_MUSCLE_CELL_CONTRACTION	62	0.285469	1.25693	0.236253	0.274202	0.99	3421	tags=35%, list=25%, signal=47%
GOBP_AMYLOID_BETA_METABOLIC_PROCESS	GOBP_AMYLOID_BETA_METABOLIC_PROCESS	50	0.291665	1.25595	0.142562	0.274883	0.99	6323	tags=64%, list=45%, signal=117%
GOBP_REGULATION_OF_AMINO_ACID_TRANSMEMBRANE_TRANSPORT	GOBP_REGULATION_OF_AMINO_ACID_TRANSMEMBRANE_TRANSPORT	17	0.416912	1.25509	0.248447	0.275577	0.99	4663	tags=59%, list=33%, signal=88%
GOBP_POSITIVE_REGULATION_OF_ANIMAL_ORGAN_MORPHOGENESIS	GOBP_POSITIVE_REGULATION_OF_ANIMAL_ORGAN_MORPHOGENESIS	32	0.332216	1.25465	0.285417	0.275818	0.99	3396	tags=38%, list=24%, signal=49%
GOBP_POSITIVE_REGULATION_OF_GLYCOPROTEIN_METABOLIC_PROCESS	GOBP_POSITIVE_REGULATION_OF_GLYCOPROTEIN_METABOLIC_PROCESS	24	0.308829	1.25362	0.220619	0.276562	0.99	5330	tags=50%, list=38%, signal=81%
GOBP_BEHAVIORAL_RESPONSE_TO_PAIN	GOBP_BEHAVIORAL_RESPONSE_TO_PAIN	21	0.39434	1.25352	0.213307	0.276526	0.99	2478	tags=48%, list=18%, signal=58%
GOBP_VENTRICULAR_CARDIAC_MUSCLE_CELL_MEMBRANE_REPOLARIZATION	GOBP_VENTRICULAR_CARDIAC_MUSCLE_CELL_MEMBRANE_REPOLARIZATION	21	0.3891	1.25335	0.218935	0.27655	0.99	1281	tags=29%, list=9%, signal=31%
GOBP_MUCUS_SECRETION	GOBP_MUCUS_SECRETION	18	0.36154	1.25308	0.226069	0.276628	0.99	5092	tags=50%, list=37%, signal=79%
GOBP_PIGMENT_METABOLIC_PROCESS	GOBP_PIGMENT_METABOLIC_PROCESS	61	0.305441	1.25211	0.262097	0.277373	0.99	5812	tags=54%, list=42%, signal=92%
GOBP_NEGATIVE_REGULATION_OF_PROTEIN_MODIFICATION_PROCESS	GOBP_NEGATIVE_REGULATION_OF_PROTEIN_MODIFICATION_PROCESS	454	0.239528	1.25202	0.115063	0.277296	0.99	8079	tags=68%, list=58%, signal=156%
GOBP_POSITIVE_REGULATION_OF_INTRACELLULAR_PROTEIN_TRANSPORT	GOBP_POSITIVE_REGULATION_OF_INTRACELLULAR_PROTEIN_TRANSPORT	135	0.263395	1.25194	0.0880503	0.277239	0.99	6800	tags=59%, list=49%, signal=115%
GOBP_ENDOSOME_TO_LYSOSOME_TRANSPORT	GOBP_ENDOSOME_TO_LYSOSOME_TRANSPORT	64	0.338837	1.25159	0.141372	0.277426	0.99	7861	tags=83%, list=56%, signal=189%
GOBP_POSITIVE_REGULATION_OF_JNK_CASCADE	GOBP_POSITIVE_REGULATION_OF_JNK_CASCADE	85	0.248769	1.25157	0.306748	0.277293	0.99	2872	tags=25%, list=21%, signal=31%
GOBP_REGULATION_OF_EXTRINSIC_APOPTOTIC_SIGNALING_PATHWAY_IN_ABSENCE_OF_LIGAND	GOBP_REGULATION_OF_EXTRINSIC_APOPTOTIC_SIGNALING_PATHWAY_IN_ABSENCE_OF_LIGAND	42	0.244498	1.25113	0.235656	0.277554	0.99	4679	tags=40%, list=34%, signal=61%
GOBP_RESPONSE_TO_MURAMYL_DIPEPTIDE	GOBP_RESPONSE_TO_MURAMYL_DIPEPTIDE	19	0.389415	1.25093	0.23494	0.277577	0.99	1991	tags=32%, list=14%, signal=37%
GOBP_DEVELOPMENTAL_CELL_GROWTH	GOBP_DEVELOPMENTAL_CELL_GROWTH	252	0.215208	1.25091	0.325052	0.277456	0.99	3825	tags=29%, list=27%, signal=40%
GOBP_T_CELL_DIFFERENTIATION_IN_THYMUS	GOBP_T_CELL_DIFFERENTIATION_IN_THYMUS	93	0.221556	1.2509	0.298137	0.277313	0.99	1883	tags=15%, list=14%, signal=17%
GOBP_REGULATION_OF_KETONE_BIOSYNTHETIC_PROCESS	GOBP_REGULATION_OF_KETONE_BIOSYNTHETIC_PROCESS	16	0.400291	1.24997	0.231884	0.278055	0.99	4229	tags=38%, list=30%, signal=54%
GOBP_NEGATIVE_REGULATION_OF_LYMPHOCYTE_APOPTOTIC_PROCESS	GOBP_NEGATIVE_REGULATION_OF_LYMPHOCYTE_APOPTOTIC_PROCESS	35	0.31626	1.24918	0.195789	0.278679	0.99	4753	tags=46%, list=34%, signal=69%
GOBP_WOUND_HEALING_SPREADING_OF_EPIDERMAL_CELLS	GOBP_WOUND_HEALING_SPREADING_OF_EPIDERMAL_CELLS	19	0.360937	1.24829	0.25	0.279335	0.99	3026	tags=32%, list=22%, signal=40%
GOBP_POSITIVE_REGULATION_OF_CYCLIN_DEPENDENT_PROTEIN_KINASE_ACTIVITY	GOBP_POSITIVE_REGULATION_OF_CYCLIN_DEPENDENT_PROTEIN_KINASE_ACTIVITY	24	0.290348	1.24789	0.249497	0.27956	0.99	7227	tags=63%, list=52%, signal=130%
GOBP_REGULATION_OF_TYPE_B_PANCREATIC_CELL_PROLIFERATION	GOBP_REGULATION_OF_TYPE_B_PANCREATIC_CELL_PROLIFERATION	16	0.374704	1.24703	0.185417	0.280195	0.99	1989	tags=31%, list=14%, signal=36%
GOBP_POSITIVE_REGULATION_OF_STEROID_BIOSYNTHETIC_PROCESS	GOBP_POSITIVE_REGULATION_OF_STEROID_BIOSYNTHETIC_PROCESS	22	0.373206	1.24627	0.166667	0.280661	0.99	2764	tags=41%, list=20%, signal=51%
GOBP_BARBED_END_ACTIN_FILAMENT_CAPPING	GOBP_BARBED_END_ACTIN_FILAMENT_CAPPING	23	0.349978	1.24613	0.153846	0.280674	0.99	7026	tags=78%, list=50%, signal=158%
GOBP_CELL_PROJECTION_ASSEMBLY	GOBP_CELL_PROJECTION_ASSEMBLY	466	0.190839	1.24606	0.317719	0.280642	0.99	3719	tags=27%, list=27%, signal=36%
GOBP_REGULATION_OF_MUSCLE_HYPERTROPHY	GOBP_REGULATION_OF_MUSCLE_HYPERTROPHY	72	0.272505	1.24585	0.158996	0.280688	0.99	7404	tags=65%, list=53%, signal=139%
GOBP_POST_ANAL_TAIL_MORPHOGENESIS	GOBP_POST_ANAL_TAIL_MORPHOGENESIS	21	0.356133	1.24577	0.273292	0.280599	0.99	831	tags=14%, list=6%, signal=15%
GOBP_NEURON_PROJECTION_ARBORIZATION	GOBP_NEURON_PROJECTION_ARBORIZATION	25	0.364961	1.24522	0.283333	0.280939	0.992	1943	tags=24%, list=14%, signal=28%
GOBP_RELAXATION_OF_MUSCLE	GOBP_RELAXATION_OF_MUSCLE	36	0.305809	1.24519	0.242171	0.280828	0.992	7095	tags=64%, list=51%, signal=130%
GOBP_JNK_CASCADE	GOBP_JNK_CASCADE	153	0.231409	1.24479	0.288703	0.281044	0.992	2872	tags=24%, list=21%, signal=30%
GOBP_LEARNING	GOBP_LEARNING	125	0.225635	1.24479	0.259109	0.280901	0.992	2905	tags=28%, list=21%, signal=35%
GOBP_SODIUM_ION_IMPORT_ACROSS_PLASMA_MEMBRANE	GOBP_SODIUM_ION_IMPORT_ACROSS_PLASMA_MEMBRANE	17	0.44678	1.24473	0.20284	0.280808	0.992	1821	tags=29%, list=13%, signal=34%
GOBP_CENTRAL_NERVOUS_SYSTEM_NEURON_DEVELOPMENT	GOBP_CENTRAL_NERVOUS_SYSTEM_NEURON_DEVELOPMENT	80	0.23902	1.24417	0.327161	0.281134	0.992	3437	tags=28%, list=25%, signal=36%
GOBP_CHOLESTEROL_STORAGE	GOBP_CHOLESTEROL_STORAGE	17	0.367078	1.24403	0.256729	0.281126	0.992	3013	tags=41%, list=22%, signal=52%
GOBP_REGULATION_OF_NEUROBLAST_PROLIFERATION	GOBP_REGULATION_OF_NEUROBLAST_PROLIFERATION	41	0.286908	1.24394	0.305085	0.281101	0.992	2414	tags=24%, list=17%, signal=29%
GOBP_POSITIVE_REGULATION_OF_ALPHA_BETA_T_CELL_PROLIFERATION	GOBP_POSITIVE_REGULATION_OF_ALPHA_BETA_T_CELL_PROLIFERATION	25	0.404243	1.24323	0.239919	0.281572	0.992	3494	tags=52%, list=25%, signal=69%
GOBP_REGULATION_OF_ATP_BIOSYNTHETIC_PROCESS	GOBP_REGULATION_OF_ATP_BIOSYNTHETIC_PROCESS	21	0.350391	1.24314	0.155602	0.281515	0.992	5922	tags=62%, list=43%, signal=108%
GOBP_VASCULAR_ENDOTHELIAL_CELL_PROLIFERATION	GOBP_VASCULAR_ENDOTHELIAL_CELL_PROLIFERATION	26	0.317017	1.2431	0.272349	0.281446	0.992	1929	tags=31%, list=14%, signal=36%
GOBP_POSITIVE_REGULATION_OF_ERYTHROCYTE_DIFFERENTIATION	GOBP_POSITIVE_REGULATION_OF_ERYTHROCYTE_DIFFERENTIATION	29	0.330828	1.24303	0.179916	0.28135	0.992	1485	tags=21%, list=11%, signal=23%
GOBP_CELLULAR_POLYSACCHARIDE_CATABOLIC_PROCESS	GOBP_CELLULAR_POLYSACCHARIDE_CATABOLIC_PROCESS	23	0.341339	1.24181	0.287169	0.282319	0.992	6683	tags=74%, list=48%, signal=142%
GOBP_GLIAL_CELL_APOPTOTIC_PROCESS	GOBP_GLIAL_CELL_APOPTOTIC_PROCESS	18	0.333107	1.24121	0.159509	0.282765	0.992	3778	tags=44%, list=27%, signal=61%
GOBP_CARTILAGE_DEVELOPMENT	GOBP_CARTILAGE_DEVELOPMENT	175	0.23719	1.24046	0.299376	0.283263	0.992	2367	tags=21%, list=17%, signal=24%
GOBP_VESICLE_DOCKING	GOBP_VESICLE_DOCKING	57	0.270444	1.24027	0.164583	0.283291	0.992	7271	tags=65%, list=52%, signal=135%
GOBP_NEUROTROPHIN_SIGNALING_PATHWAY	GOBP_NEUROTROPHIN_SIGNALING_PATHWAY	40	0.236851	1.23998	0.235656	0.283447	0.992	3742	tags=33%, list=27%, signal=44%
GOBP_RESPONSE_TO_KETONE	GOBP_RESPONSE_TO_KETONE	117	0.232854	1.23989	0.0985325	0.283387	0.992	6276	tags=50%, list=45%, signal=91%
GOBP_CHAPERONE_MEDIATED_PROTEIN_FOLDING	GOBP_CHAPERONE_MEDIATED_PROTEIN_FOLDING	60	0.348156	1.23936	0.1625	0.283732	0.992	7235	tags=80%, list=52%, signal=166%
GOBP_NEGATIVE_REGULATION_OF_LIPID_TRANSPORT	GOBP_NEGATIVE_REGULATION_OF_LIPID_TRANSPORT	28	0.304791	1.23893	0.238659	0.283972	0.992	6820	tags=64%, list=49%, signal=126%
GOBP_POSITIVE_REGULATION_OF_UBIQUITIN_PROTEIN_TRANSFERASE_ACTIVITY	GOBP_POSITIVE_REGULATION_OF_UBIQUITIN_PROTEIN_TRANSFERASE_ACTIVITY	26	0.355855	1.2388	0.128099	0.28393	0.992	7618	tags=85%, list=55%, signal=186%
GOBP_SULFUR_COMPOUND_TRANSPORT	GOBP_SULFUR_COMPOUND_TRANSPORT	31	0.325391	1.2369	0.186975	0.285506	0.993	6098	tags=61%, list=44%, signal=109%
GOBP_REGULATION_OF_RUFFLE_ASSEMBLY	GOBP_REGULATION_OF_RUFFLE_ASSEMBLY	26	0.326739	1.2366	0.149378	0.285645	0.994	7347	tags=73%, list=53%, signal=154%
GOBP_RIG_I_SIGNALING_PATHWAY	GOBP_RIG_I_SIGNALING_PATHWAY	25	0.33428	1.23639	0.115854	0.285694	0.994	7379	tags=76%, list=53%, signal=161%
GOBP_RESPONSE_TO_ENDOPLASMIC_RETICULUM_STRESS	GOBP_RESPONSE_TO_ENDOPLASMIC_RETICULUM_STRESS	235	0.298882	1.23595	0.113208	0.286001	0.994	7070	tags=69%, list=51%, signal=138%
GOBP_MUSCLE_CELL_CELLULAR_HOMEOSTASIS	GOBP_MUSCLE_CELL_CELLULAR_HOMEOSTASIS	26	0.345411	1.23578	0.281437	0.285997	0.994	4822	tags=54%, list=35%, signal=82%
GOBP_POSITIVE_REGULATION_OF_MITOCHONDRIAL_FISSION	GOBP_POSITIVE_REGULATION_OF_MITOCHONDRIAL_FISSION	20	0.373109	1.23567	0.163522	0.28595	0.994	6865	tags=80%, list=49%, signal=157%
GOBP_RIBONUCLEOSIDE_METABOLIC_PROCESS	GOBP_RIBONUCLEOSIDE_METABOLIC_PROCESS	26	0.348185	1.23555	0.272549	0.285909	0.994	3305	tags=42%, list=24%, signal=55%
GOBP_REGULATION_OF_ANIMAL_ORGAN_MORPHOGENESIS	GOBP_REGULATION_OF_ANIMAL_ORGAN_MORPHOGENESIS	106	0.261798	1.23537	0.347368	0.285915	0.994	2083	tags=19%, list=15%, signal=22%
GOBP_PIGMENTATION	GOBP_PIGMENTATION	102	0.231445	1.23536	0.316017	0.285787	0.994	7590	tags=61%, list=54%, signal=133%
GOBP_NEGATIVE_REGULATION_OF_BLOOD_CIRCULATION	GOBP_NEGATIVE_REGULATION_OF_BLOOD_CIRCULATION	23	0.327761	1.23478	0.202105	0.286141	0.994	5321	tags=52%, list=38%, signal=84%
GOBP_CHONDROITIN_SULFATE_PROTEOGLYCAN_BIOSYNTHETIC_PROCESS	GOBP_CHONDROITIN_SULFATE_PROTEOGLYCAN_BIOSYNTHETIC_PROCESS	19	0.357965	1.23445	0.256863	0.286325	0.994	2539	tags=37%, list=18%, signal=45%
GOBP_SEGMENT_SPECIFICATION	GOBP_SEGMENT_SPECIFICATION	18	0.357228	1.23428	0.249489	0.286318	0.994	1791	tags=22%, list=13%, signal=25%
GOBP_CARDIAC_CONDUCTION	GOBP_CARDIAC_CONDUCTION	59	0.307331	1.23389	0.219959	0.28654	0.994	3094	tags=32%, list=22%, signal=41%
GOBP_POSITIVE_REGULATION_OF_INSULIN_SECRETION_INVOLVED_IN_CELLULAR_RESPONSE_TO_GLUCOSE_STIMULUS	GOBP_POSITIVE_REGULATION_OF_INSULIN_SECRETION_INVOLVED_IN_CELLULAR_RESPONSE_TO_GLUCOSE_STIMULUS	36	0.277304	1.23283	0.190871	0.287448	0.994	7256	tags=64%, list=52%, signal=133%
GOBP_RAB_PROTEIN_SIGNAL_TRANSDUCTION	GOBP_RAB_PROTEIN_SIGNAL_TRANSDUCTION	15	0.333931	1.23227	0.195473	0.287763	0.994	6712	tags=73%, list=48%, signal=141%
GOBP_NEUTRAL_AMINO_ACID_TRANSPORT	GOBP_NEUTRAL_AMINO_ACID_TRANSPORT	43	0.310565	1.23192	0.240741	0.287958	0.994	3500	tags=35%, list=25%, signal=46%
GOBP_DETOXIFICATION	GOBP_DETOXIFICATION	58	0.321406	1.23163	0.311065	0.288069	0.994	7332	tags=72%, list=53%, signal=152%
GOBP_NEURON_PROJECTION_EXTENSION	GOBP_NEURON_PROJECTION_EXTENSION	185	0.222461	1.2314	0.310838	0.288136	0.994	3614	tags=29%, list=26%, signal=38%
GOBP_ACYLGLYCEROL_HOMEOSTASIS	GOBP_ACYLGLYCEROL_HOMEOSTASIS	25	0.321027	1.23124	0.282609	0.288119	0.994	3676	tags=36%, list=26%, signal=49%
GOBP_HYPEROSMOTIC_RESPONSE	GOBP_HYPEROSMOTIC_RESPONSE	16	0.403874	1.23062	0.248473	0.288549	0.994	5728	tags=69%, list=41%, signal=117%
GOBP_REGULATION_OF_MICROTUBULE_POLYMERIZATION	GOBP_REGULATION_OF_MICROTUBULE_POLYMERIZATION	55	0.269014	1.23058	0.267368	0.288435	0.994	4446	tags=38%, list=32%, signal=56%
GOBP_SCHWANN_CELL_DIFFERENTIATION	GOBP_SCHWANN_CELL_DIFFERENTIATION	42	0.272522	1.22988	0.21281	0.288935	0.994	1683	tags=21%, list=12%, signal=24%
GOBP_AMELOGENESIS	GOBP_AMELOGENESIS	17	0.364515	1.22908	0.301455	0.289495	0.994	1988	tags=24%, list=14%, signal=27%
GOBP_MULTICELLULAR_ORGANISMAL_LEVEL_IRON_ION_HOMEOSTASIS	GOBP_MULTICELLULAR_ORGANISMAL_LEVEL_IRON_ION_HOMEOSTASIS	19	0.340037	1.22899	0.146392	0.28943	0.994	7332	tags=79%, list=53%, signal=166%
GOBP_RESPONSE_TO_CATECHOLAMINE	GOBP_RESPONSE_TO_CATECHOLAMINE	50	0.23813	1.22899	0.223361	0.289293	0.994	6116	tags=56%, list=44%, signal=99%
GOBP_EPITHELIAL_TUBE_MORPHOGENESIS	GOBP_EPITHELIAL_TUBE_MORPHOGENESIS	332	0.230764	1.22868	0.359833	0.289402	0.994	1716	tags=16%, list=12%, signal=18%
GOBP_NEGATIVE_REGULATION_OF_TRANSFORMING_GROWTH_FACTOR_BETA_RECEPTOR_SIGNALING_PATHWAY	GOBP_NEGATIVE_REGULATION_OF_TRANSFORMING_GROWTH_FACTOR_BETA_RECEPTOR_SIGNALING_PATHWAY	86	0.229501	1.22853	0.204255	0.289381	0.994	7307	tags=62%, list=52%, signal=129%
GOBP_RETINAL_ROD_CELL_DIFFERENTIATION	GOBP_RETINAL_ROD_CELL_DIFFERENTIATION	16	0.393986	1.22798	0.215933	0.289717	0.994	2469	tags=31%, list=18%, signal=38%
GOBP_ATP_METABOLIC_PROCESS	GOBP_ATP_METABOLIC_PROCESS	196	0.326402	1.22741	0.322105	0.290036	0.994	6597	tags=70%, list=47%, signal=131%
GOBP_PLATELET_MORPHOGENESIS	GOBP_PLATELET_MORPHOGENESIS	20	0.328471	1.22738	0.259259	0.28992	0.994	3403	tags=40%, list=24%, signal=53%
GOBP_FAT_CELL_DIFFERENTIATION	GOBP_FAT_CELL_DIFFERENTIATION	245	0.242305	1.22613	0.249476	0.290913	0.994	3160	tags=27%, list=23%, signal=34%
GOBP_POSITIVE_REGULATION_OF_INTERLEUKIN_4_PRODUCTION	GOBP_POSITIVE_REGULATION_OF_INTERLEUKIN_4_PRODUCTION	18	0.377069	1.22567	0.237996	0.29115	0.994	1803	tags=28%, list=13%, signal=32%
GOBP_PROTEOGLYCAN_BIOSYNTHETIC_PROCESS	GOBP_PROTEOGLYCAN_BIOSYNTHETIC_PROCESS	50	0.253318	1.22559	0.251534	0.291083	0.994	2118	tags=24%, list=15%, signal=28%
GOBP_AMINO_ACID_TRANSMEMBRANE_TRANSPORT	GOBP_AMINO_ACID_TRANSMEMBRANE_TRANSPORT	70	0.270397	1.22489	0.237895	0.291564	0.994	3500	tags=31%, list=25%, signal=42%
GOBP_SLEEP	GOBP_SLEEP	21	0.384805	1.22458	0.185484	0.291711	0.994	2181	tags=29%, list=16%, signal=34%
GOBP_NEGATIVE_REGULATION_OF_UBIQUITIN_PROTEIN_TRANSFERASE_ACTIVITY	GOBP_NEGATIVE_REGULATION_OF_UBIQUITIN_PROTEIN_TRANSFERASE_ACTIVITY	19	0.392903	1.22451	0.227468	0.291648	0.994	7158	tags=84%, list=51%, signal=173%
[truncated: 1,601 more rows]
